# Supplementary material for: Weighted gene co-expression network analysis identifies important modules and hub genes involved in the regulation of breast muscle yield in broilers
Source: PubMed Central journal article supplement (PMC11366510; doi:10.5713/ab.23.0548), 2024-04-25
Supplement: ab-23-0548-Supplementary-Table-1.pdf [file ab-23-0548-Supplementary-Table-1.pdf]

**Table S1. Body weight for 147 experiment birds at the market age of 50 d.**

| Sample     | Body weight (g) |
|------------|-----------------|
| Brolier 1  | 1756.6          |
| Brolier 2  | 1882.4          |
| Brolier 3  | 2025.1          |
| Brolier 4  | 1940.5          |
| Brolier 5  | 1827.3          |
| Brolier 6  | 1947.0          |
| Brolier 7  | 2066.4          |
| Brolier 8  | 1933.5          |
| Brolier 9  | 2087.1          |
| Brolier 10 | 1712.8          |
| Brolier 11 | 1729.3          |
| Brolier 12 | 1968.2          |
| Brolier 13 | 1766.3          |
| Brolier 14 | 1951.8          |
| Brolier 15 | 1970.7          |
| Brolier 16 | 1870.5          |
| Brolier 17 | 2019.6          |
| Brolier 18 | 1818.9          |
| Brolier 19 | 1922.9          |
| Brolier 20 | 2069.3          |
| Brolier 21 | 2082.5          |
| Brolier 22 | 1821.7          |
| Brolier 23 | 1820.4          |
| Brolier 24 | 1922.9          |
| Brolier 25 | 2078.6          |
| Brolier 26 | 2081.6          |
| Brolier 27 | 1886.9          |
| Brolier 28 | 1968.2          |
| Brolier 29 | 1837.7          |
| Brolier 30 | 1814.8          |
| Brolier 31 | 1937.4          |
| Brolier 32 | 1920.7          |
| Brolier 33 | 2092.5          |
| Brolier 34 | 1760.5          |
| Brolier 35 | 2060.0          |
| Brolier 36 | 1835.4          |
| Brolier 37 | 2067.8          |
| Brolier 38 | 1988.7          |
| Brolier 39 | 1916.1          |
| Brolier 40 | 2083.4          |
| Brolier 41 | 1902.9          |
| Brolier 42 | 1886.0          |
| Brolier 43 | 1701.6          |
| Brolier 44 | 2004.0          |
| Brolier 45 | 2026.8          |
| Brolier 46 | 2078.7          |
| Brolier 47 | 1808.7          |
| Brolier 48 | 1998.8          |
| Brolier 49 | 1902.9          |
| Brolier 50 | 1813.6          |
| Brolier 51 | 1918.8          |
| Brolier 52 | 1926.6          |
| Brolier 53 | 2044.4          |
| Brolier 54 | 1805.1          |

|             |        |
|-------------|--------|
| Brolier 55  | 1968.9 |
| Brolier 56  | 1787.2 |
| Brolier 57  | 1995.6 |
| Brolier 58  | 1722.8 |
| Brolier 59  | 2029.8 |
| Brolier 60  | 1961.9 |
| Brolier 61  | 1982.5 |
| Brolier 62  | 2049.5 |
| Brolier 63  | 1844.5 |
| Brolier 64  | 1972.1 |
| Brolier 65  | 2006.9 |
| Brolier 66  | 1899.7 |
| Brolier 67  | 2028.6 |
| Brolier 68  | 1813.9 |
| Brolier 69  | 1729.0 |
| Brolier 70  | 1839.9 |
| Brolier 71  | 2092.9 |
| Brolier 72  | 1761.1 |
| Brolier 73  | 1799.2 |
| Brolier 74  | 1846.9 |
| Brolier 75  | 1969.1 |
| Brolier 76  | 2049.4 |
| Brolier 77  | 1826.6 |
| Brolier 78  | 1835.6 |
| Brolier 79  | 1798.8 |
| Brolier 80  | 1859.5 |
| Brolier 81  | 1948.2 |
| Brolier 82  | 1995.6 |
| Brolier 83  | 2053.5 |
| Brolier 84  | 1884.2 |
| Brolier 85  | 1933.4 |
| Brolier 86  | 1795.1 |
| Brolier 87  | 1781.8 |
| Brolier 88  | 1879.2 |
| Brolier 89  | 1847.7 |
| Brolier 90  | 2065.0 |
| Brolier 91  | 1758.9 |
| Brolier 92  | 2087.1 |
| Brolier 93  | 2000.0 |
| Brolier 94  | 2028.0 |
| Brolier 95  | 1809.0 |
| Brolier 96  | 1869.4 |
| Brolier 97  | 1727.1 |
| Brolier 98  | 1800.0 |
| Brolier 99  | 1989.4 |
| Brolier 100 | 1890.1 |
| Brolier 101 | 1824.6 |
| Brolier 102 | 1892.6 |
| Brolier 103 | 2061.2 |
| Brolier 104 | 1904.4 |
| Brolier 105 | 2011.6 |
| Brolier 106 | 2043.9 |
| Brolier 107 | 1944.5 |
| Brolier 108 | 1688.6 |
| Brolier 109 | 1985.1 |
| Brolier 110 | 2083.5 |

|             |        |
|-------------|--------|
| Brolier 111 | 1874.6 |
| Brolier 112 | 1718.5 |
| Brolier 113 | 1810.1 |
| Brolier 114 | 1985.2 |
| Brolier 115 | 2100.1 |
| Brolier 116 | 1894.7 |
| Brolier 117 | 1720.0 |
| Brolier 118 | 1902.9 |
| Brolier 119 | 1769.2 |
| Brolier 120 | 1926.1 |
| Brolier 121 | 2004.5 |
| Brolier 122 | 1798.2 |
| Brolier 123 | 1843.5 |
| Brolier 124 | 2018.6 |
| Brolier 125 | 1770.1 |
| Brolier 126 | 1765.4 |
| Brolier 127 | 1788.1 |
| Brolier 128 | 1898.7 |
| Brolier 129 | 1974.3 |
| Brolier 130 | 1761.3 |
| Brolier 131 | 1827.7 |
| Brolier 132 | 1765.3 |
| Brolier 133 | 1757.5 |
| Brolier 134 | 1849.4 |
| Brolier 135 | 2075.8 |
| Brolier 136 | 1886.8 |
| Brolier 137 | 1739.5 |
| Brolier 138 | 1719.9 |
| Brolier 139 | 1746.5 |
| Brolier 140 | 1844.4 |
| Brolier 141 | 1759.8 |
| Brolier 142 | 1750.7 |
| Brolier 143 | 1966.5 |
| Brolier 144 | 1764.5 |
| Brolier 145 | 1780.9 |
| Brolier 146 | 1827.4 |
| Brolier 147 | 2027.1 |
