# Supplementary material for: Weighted gene co-expression network analysis identifies important modules and hub genes involved in the regulation of breast muscle yield in broilers
Source: PubMed Central journal article supplement (PMC11366510; doi:10.5713/ab.23.0548), 2024-04-25
Supplement: ab-23-0548-Supplementary-Table-2.pdf [file ab-23-0548-Supplementary-Table-2.pdf]

**Table S2. The breast muscle yield and body weight for the 18 selected 817 broilers.**

| Sample ID | Breast muscle yield (%) | Body weight (g) |
|-----------|-------------------------|-----------------|
| T01       | 20.52                   | 2069.3          |
| T02       | 18.75                   | 1795.1          |
| T03       | 19.93                   | 1902.9          |
| T04       | 18.33                   | 1844.5          |
| T05       | 19.28                   | 1870.5          |
| T06       | 19.15                   | 1874.6          |
| T07       | 18.55                   | 1882.4          |
| T08       | 20.28                   | 2043.9          |
| T09       | 17.74                   | 1805.1          |
| T10       | 19.72                   | 1920.7          |
| T17       | 18.81                   | 1933.4          |
| T18       | 19.11                   | 1948.2          |
| T19       | 18.35                   | 1769.2          |
| T20       | 19.94                   | 1985.1          |
| T21       | 18.71                   | 1894.7          |
| T22       | 19.14                   | 2061.2          |
| T23       | 18.97                   | 1968.2          |
| T24       | 20.77                   | 2087.1          |
