# Supplementary material for: Weighted gene co-expression network analysis identifies important modules and hub genes involved in the regulation of breast muscle yield in broilers
Source: PubMed Central journal article supplement (PMC11366510; doi:10.5713/ab.23.0548), 2024-04-25
Supplement: ab-23-0548-Supplementary-Table-3.pdf [file ab-23-0548-Supplementary-Table-3.pdf]

**Table S3. qPCR primers for the six hub genes.**

| <b>Gene Name</b> | <b>Sequence of primer(5'-3')</b> | <b>Product scize (bp)</b> |
|------------------|----------------------------------|---------------------------|
| TPM1             | tgaggaagagttggatcggg             | 213                       |
|                  | gccacctcttcatacttgcg             |                           |
| CAV3             | acctcaccgtcagcaagta              | 246                       |
|                  | aacctgacgttactgcaga              |                           |
| MYF6             | aagaggcggaggagaaatga             | 160                       |
|                  | ggtggtctgtgggtcaaac              |                           |
| CFL2             | tcatgaaatctcgagctc               | 226                       |
|                  | caaacatgtccccagtga               |                           |
| DLX3             | ggaaaccaagaagatccgc              | 204                       |
|                  | cgcggttctgtagagcttc              |                           |
| SH3RF2           | actcgacctggctttctga              | 161                       |
|                  | agtccttgctgtgctctcat             |                           |
| GAPDH            | ctacacacggacacttcaag             | 244                       |
|                  | acaaacatgggggcatcag              |                           |
