# Supplementary material for: Weighted gene co-expression network analysis identifies important modules and hub genes involved in the regulation of breast muscle yield in broilers
Source: PubMed Central journal article supplement (PMC11366510; doi:10.5713/ab.23.0548), 2024-04-25
Supplement: ab-23-0548-Supplementary-Table-4.pdf [file ab-23-0548-Supplementary-Table-4.pdf]

**Table S4. Summary of RNA-seq data.**

| Sample ID | Obtained Reads | Obtained Base(bp) | Q20(%) | Q30(%) | Mapped ratio | Expressed Gene Numbers |
|-----------|----------------|-------------------|--------|--------|--------------|------------------------|
| T01       | 22,398,081     | 6,590,708,822     | 99.23  | 96.95  | 0.8507       | 15447                  |
| T02       | 26,474,502     | 7,917,689,566     | 97.16  | 95.37  | 0.855        | 16316                  |
| T03       | 23,722,541     | 7,093,886,418     | 98.13  | 94.92  | 0.85         | 15754                  |
| T04       | 25,428,440     | 7,591,598,618     | 98.21  | 95.29  | 0.8692       | 16997                  |
| T05       | 23,348,002     | 6,983,154,724     | 98.3   | 95.5   | 0.8582       | 16136                  |
| T06       | 23,971,663     | 7,165,810,160     | 98.16  | 95.19  | 0.8498       | 16670                  |
| T07       | 24,846,611     | 7,429,548,126     | 98.29  | 95.48  | 0.8425       | 15305                  |
| T08       | 26,272,074     | 7,857,050,174     | 98.28  | 95.45  | 0.8566       | 16705                  |
| T09       | 25,759,409     | 7,688,277,382     | 98.37  | 95.58  | 0.8617       | 16635                  |
| T10       | 24,278,097     | 7,255,658,700     | 98.27  | 95.37  | 0.8628       | 16758                  |
| T17       | 19,782,100     | 5,905,567,802     | 98.04  | 94.41  | 0.93914372   | 17188                  |
| T18       | 23,840,259     | 7,131,208,736     | 97.36  | 92.75  | 0.93692517   | 17272                  |
| T19       | 24,932,030     | 7,455,643,004     | 97.76  | 93.85  | 0.93257957   | 17430                  |
| T20       | 27,508,474     | 8,221,256,254     | 97.68  | 93.75  | 0.93303511   | 17817                  |
| T21       | 22,378,894     | 6,685,088,132     | 97.55  | 93.37  | 0.93574809   | 17402                  |
| T22       | 27,522,043     | 8,200,374,676     | 97.7   | 93.83  | 0.93281403   | 17707                  |
| T23       | 22,676,648     | 6,789,175,820     | 97.85  | 94.01  | 0.94066911   | 17591                  |
| T24       | 20,904,521     | 6,245,592,412     | 97.38  | 92.94  | 0.93140144   | 17208                  |
