# Supplementary material for: Weighted gene co-expression network analysis identifies important modules and hub genes involved in the regulation of breast muscle yield in broilers
Source: PubMed Central journal article supplement (PMC11366510; doi:10.5713/ab.23.0548), 2024-04-25
Supplement: ab-23-0548-Supplementary-Table-5.pdf [file ab-23-0548-Supplementary-Table-5.pdf]

**Table S5. Functional enrichment analysis of the genes in the turquoise module.**

| Category | Term description                                                                   | Term ID    | Adjusted p value |
|----------|------------------------------------------------------------------------------------|------------|------------------|
| GO:MF    | protein binding                                                                    | GO:0005515 | 6.43E-48         |
| GO:MF    | catalytic activity                                                                 | GO:0003824 | 6.84E-33         |
| GO:MF    | binding                                                                            | GO:0005488 | 1.01E-30         |
| GO:MF    | enzyme binding                                                                     | GO:0019899 | 3.26E-17         |
| GO:MF    | transferase activity                                                               | GO:0016740 | 6.49E-14         |
| GO:MF    | nucleoside phosphate binding                                                       | GO:1901265 | 1.74E-12         |
| GO:MF    | nucleotide binding                                                                 | GO:0000166 | 1.74E-12         |
| GO:MF    | identical protein binding                                                          | GO:0042802 | 3.86E-12         |
| GO:MF    | ion binding                                                                        | GO:0043167 | 1.03E-11         |
| GO:MF    | anion binding                                                                      | GO:0043168 | 2.78E-11         |
| GO:MF    | carbohydrate derivative binding                                                    | GO:0097367 | 3.06E-11         |
| GO:MF    | small molecule binding                                                             | GO:0036094 | 8.57E-11         |
| GO:MF    | purine nucleotide binding                                                          | GO:0017076 | 8.57E-11         |
| GO:MF    | ribonucleotide binding                                                             | GO:0032553 | 1.44E-09         |
| GO:MF    | catalytic activity, acting on a protein                                            | GO:0140096 | 1.63E-09         |
| GO:MF    | purine ribonucleoside triphosphate binding                                         | GO:0035639 | 1.85E-09         |
| GO:MF    | adenyl nucleotide binding                                                          | GO:0030554 | 2.40E-09         |
| GO:MF    | purine ribonucleotide binding                                                      | GO:0032555 | 4.59E-09         |
| GO:MF    | phosphatase activity                                                               | GO:0016791 | 6.25E-08         |
| GO:MF    | adenyl ribonucleotide binding                                                      | GO:0032559 | 1.23E-07         |
| GO:MF    | ATP binding                                                                        | GO:0005524 | 1.23E-07         |
| GO:MF    | protein kinase binding                                                             | GO:0019901 | 1.99E-07         |
| GO:MF    | oxidoreductase activity                                                            | GO:0016491 | 3.31E-07         |
| GO:MF    | protein-containing complex binding                                                 | GO:0044877 | 4.90E-07         |
| GO:MF    | kinase binding                                                                     | GO:0019900 | 6.09E-07         |
| GO:MF    | enzyme regulator activity                                                          | GO:0030234 | 9.94E-07         |
| GO:MF    | phosphoprotein phosphatase activity                                                | GO:0004721 | 1.92E-06         |
| GO:MF    | cytoskeletal protein binding                                                       | GO:0008092 | 2.14E-06         |
| GO:MF    | phosphoric ester hydrolase activity                                                | GO:0042578 | 1.77E-05         |
| GO:MF    | acyltransferase activity                                                           | GO:0016746 | 2.51E-05         |
| GO:MF    | protein domain specific binding                                                    | GO:0019904 | 4.50E-05         |
| GO:MF    | phosphotransferase activity, alcohol group as acceptor                             | GO:0016773 | 5.77E-05         |
| GO:MF    | hydrolase activity, acting on acid anhydrides                                      | GO:0016817 | 6.37E-05         |
| GO:MF    | hydrolase activity, acting on acid anhydrides, in phosphorus-containing anhydrides | GO:0016818 | 6.90E-05         |
| GO:MF    | protein homodimerization activity                                                  | GO:0042803 | 8.91E-05         |
| GO:MF    | pyrophosphatase activity                                                           | GO:0016462 | 9.05E-05         |
| GO:MF    | ribonucleoside triphosphate phosphatase activity                                   | GO:0017111 | 0.0001422        |
| GO:MF    | protein serine/threonine kinase activity                                           | GO:0004674 | 0.0001684        |
| GO:MF    | kinase activity                                                                    | GO:0016301 | 0.0003395        |
| GO:MF    | ATP-dependent activity                                                             | GO:0140657 | 0.0003755        |
| GO:MF    | protein kinase activity                                                            | GO:0004672 | 0.0005199        |
| GO:MF    | nucleoside-triphosphatase regulator activity                                       | GO:0060589 | 0.0005346        |
| GO:MF    | GTPase regulator activity                                                          | GO:0030695 | 0.0008505        |
| GO:MF    | transferase activity, transferring phosphorus-containing groups                    | GO:0016772 | 0.0008505        |
| GO:MF    | protein tyrosine/serine/threonine phosphatase activity                             | GO:0008138 | 0.0015209        |
| GO:MF    | protein dimerization activity                                                      | GO:0046983 | 0.0018046        |
| GO:MF    | aminoacyltransferase activity                                                      | GO:0016755 | 0.0018181        |
| GO:MF    | histone binding                                                                    | GO:0042393 | 0.0018889        |
| GO:MF    | guanyl-nucleotide exchange factor activity                                         | GO:0005085 | 0.0024827        |
| GO:MF    | ubiquitin-like protein transferase activity                                        | GO:0019787 | 0.0027675        |
| GO:MF    | protein-macromolecule adaptor activity                                             | GO:0030674 | 0.0037102        |

|       |                                                                                       |            |           |
|-------|---------------------------------------------------------------------------------------|------------|-----------|
| GO:MF | cell adhesion molecule binding                                                        | GO:0050839 | 0.0037102 |
| GO:MF | phosphatase binding                                                                   | GO:0019902 | 0.0037837 |
| GO:MF | translation regulator activity, nucleic acid binding                                  | GO:0090079 | 0.0038054 |
| GO:MF | modification-dependent protein binding                                                | GO:0140030 | 0.0038054 |
| GO:MF | oxidoreductase activity, acting on CH-OH group of donors                              | GO:0016614 | 0.0039328 |
| GO:MF | enzyme activator activity                                                             | GO:0008047 | 0.0040782 |
| GO:MF | transcription coregulator activity                                                    | GO:0003712 | 0.0045546 |
| GO:MF | magnesium ion binding                                                                 | GO:0000287 | 0.0048959 |
| GO:MF | ATP hydrolysis activity                                                               | GO:0016887 | 0.0048959 |
| GO:MF | protein tyrosine phosphatase activity                                                 | GO:0004725 | 0.0051425 |
| GO:MF | transcription factor binding                                                          | GO:0008134 | 0.0064557 |
| GO:MF | histone modifying activity                                                            | GO:0140993 | 0.0088561 |
| GO:MF | ubiquitin-protein transferase activity                                                | GO:0004842 | 0.0089203 |
| GO:MF | actin binding                                                                         | GO:0003779 | 0.0098505 |
| GO:MF | flavin adenine dinucleotide binding                                                   | GO:0050660 | 0.0105634 |
| GO:MF | molecular adaptor activity                                                            | GO:0060090 | 0.0105634 |
| GO:MF | DNA-binding transcription factor binding                                              | GO:0140297 | 0.0119819 |
| GO:MF | oxidoreductase activity, acting on the CH-OH group of donors, NAD or NADP as acceptor | GO:0016616 | 0.0140014 |
| GO:MF | hydrolase activity                                                                    | GO:0016787 | 0.0229192 |
| GO:MF | translation regulator activity                                                        | GO:0045182 | 0.0236966 |
| GO:MF | cation binding                                                                        | GO:0043169 | 0.0236966 |
| GO:MF | ubiquitin-like protein ligase activity                                                | GO:0061659 | 0.0236966 |
| GO:MF | ubiquitin protein ligase activity                                                     | GO:0061630 | 0.0236966 |
| GO:MF | metal ion binding                                                                     | GO:0046872 | 0.0236966 |
| GO:MF | translation factor activity, RNA binding                                              | GO:0008135 | 0.0246867 |
| GO:MF | protease binding                                                                      | GO:0002020 | 0.0308363 |
| GO:MF | primary active transmembrane transporter activity                                     | GO:0015399 | 0.0332428 |
| GO:MF | protein heterodimerization activity                                                   | GO:0046982 | 0.0348961 |
| GO:MF | translation initiation factor activity                                                | GO:0003743 | 0.0348961 |
| GO:MF | active transmembrane transporter activity                                             | GO:0022804 | 0.0350347 |
| GO:MF | telomeric DNA binding                                                                 | GO:0042162 | 0.0410808 |
| GO:MF | ribonucleoprotein complex binding                                                     | GO:0043021 | 0.0422236 |
| GO:MF | ubiquitin-like protein binding                                                        | GO:0032182 | 0.0468246 |
| GO:MF | protein serine/threonine phosphatase activity                                         | GO:0004722 | 0.0468246 |
| GO:MF | iron-sulfur cluster binding                                                           | GO:0051536 | 0.0468246 |
| GO:MF | metal cluster binding                                                                 | GO:0051540 | 0.0468246 |
| GO:MF | carbohydrate derivative transmembrane transporter activity                            | GO:1901505 | 0.0491267 |
| GO:BP | organonitrogen compound metabolic process                                             | GO:1901564 | 4.50E-46  |
| GO:BP | protein metabolic process                                                             | GO:0019538 | 4.89E-39  |
| GO:BP | macromolecule modification                                                            | GO:0043412 | 6.09E-36  |
| GO:BP | protein modification process                                                          | GO:0036211 | 6.29E-32  |
| GO:BP | positive regulation of biological process                                             | GO:0048518 | 1.11E-26  |
| GO:BP | response to stress                                                                    | GO:0006950 | 4.82E-24  |
| GO:BP | catabolic process                                                                     | GO:0009056 | 1.09E-21  |
| GO:BP | positive regulation of cellular process                                               | GO:0048522 | 5.09E-21  |
| GO:BP | cellular localization                                                                 | GO:0051641 | 2.63E-20  |
| GO:BP | regulation of protein metabolic process                                               | GO:0051246 | 1.31E-19  |
| GO:BP | localization                                                                          | GO:0051179 | 1.62E-19  |
| GO:BP | intracellular signal transduction                                                     | GO:0035556 | 2.14E-19  |
| GO:BP | regulation of response to stimulus                                                    | GO:0048583 | 2.92E-19  |
| GO:BP | phosphorus metabolic process                                                          | GO:0006793 | 1.08E-17  |
| GO:BP | phosphate-containing compound metabolic process                                       | GO:0006796 | 1.74E-17  |
| GO:BP | organic substance catabolic process                                                   | GO:1901575 | 7.86E-17  |
| GO:BP | cellular response to stress                                                           | GO:0033554 | 1.22E-16  |
| GO:BP | macromolecule localization                                                            | GO:0033036 | 1.27E-16  |

|       |                                                            |            |          |
|-------|------------------------------------------------------------|------------|----------|
| GO:BP | primary metabolic process                                  | GO:0044238 | 1.98E-16 |
| GO:BP | regulation of cellular component organization              | GO:0051128 | 4.41E-16 |
| GO:BP | cellular macromolecule localization                        | GO:0070727 | 5.26E-16 |
| GO:BP | cellular component organization or biogenesis              | GO:0071840 | 6.61E-16 |
| GO:BP | protein localization                                       | GO:0008104 | 8.61E-16 |
| GO:BP | amide metabolic process                                    | GO:0043603 | 2.68E-15 |
| GO:BP | intracellular transport                                    | GO:0046907 | 4.00E-15 |
| GO:BP | positive regulation of molecular function                  | GO:0044093 | 5.43E-15 |
| GO:BP | positive regulation of metabolic process                   | GO:0009893 | 6.35E-15 |
| GO:BP | establishment of localization                              | GO:0051234 | 1.57E-14 |
| GO:BP | regulation of molecular function                           | GO:0065009 | 2.26E-14 |
| GO:BP | transport                                                  | GO:0006810 | 2.65E-14 |
| GO:BP | macromolecule catabolic process                            | GO:0009057 | 6.16E-14 |
| GO:BP | nitrogen compound metabolic process                        | GO:0006807 | 7.16E-14 |
| GO:BP | organonitrogen compound catabolic process                  | GO:1901565 | 1.34E-13 |
| GO:BP | cellular component organization                            | GO:0016043 | 2.17E-13 |
| GO:BP | cellular response to chemical stimulus                     | GO:0070887 | 2.19E-13 |
| GO:BP | small molecule metabolic process                           | GO:0044281 | 3.42E-13 |
| GO:BP | establishment of localization in cell                      | GO:0051649 | 3.42E-13 |
| GO:BP | response to chemical                                       | GO:0042221 | 4.74E-13 |
| GO:BP | regulation of primary metabolic process                    | GO:0080090 | 8.45E-13 |
| GO:BP | regulation of intracellular signal transduction            | GO:1902531 | 9.34E-13 |
| GO:BP | organonitrogen compound biosynthetic process               | GO:1901566 | 1.27E-12 |
| GO:BP | peptide metabolic process                                  | GO:0006518 | 1.38E-12 |
| GO:BP | response to external stimulus                              | GO:0009605 | 1.79E-12 |
| GO:BP | amide biosynthetic process                                 | GO:0043604 | 2.19E-12 |
| GO:BP | positive regulation of macromolecule metabolic process     | GO:0010604 | 2.54E-12 |
| GO:BP | immune system process                                      | GO:0002376 | 3.96E-12 |
| GO:BP | regulation of nitrogen compound metabolic process          | GO:0051171 | 6.19E-12 |
| GO:BP | regulation of catalytic activity                           | GO:0050790 | 6.84E-12 |
| GO:BP | regulation of response to stress                           | GO:0080134 | 1.03E-11 |
| GO:BP | establishment of protein localization                      | GO:0045184 | 2.36E-11 |
| GO:BP | negative regulation of response to stimulus                | GO:0048585 | 2.36E-11 |
| GO:BP | positive regulation of cellular metabolic process          | GO:0031325 | 2.79E-11 |
| GO:BP | locomotion                                                 | GO:0040011 | 2.97E-11 |
| GO:BP | positive regulation of nitrogen compound metabolic process | GO:0051173 | 3.60E-11 |
| GO:BP | protein transport                                          | GO:0015031 | 4.09E-11 |
| GO:BP | regulation of cell motility                                | GO:2000145 | 4.80E-11 |
| GO:BP | cellular catabolic process                                 | GO:0044248 | 4.98E-11 |
| GO:BP | cell death                                                 | GO:0008219 | 5.23E-11 |
| GO:BP | protein catabolic process                                  | GO:0030163 | 5.44E-11 |
| GO:BP | positive regulation of protein metabolic process           | GO:0051247 | 5.46E-11 |
| GO:BP | programmed cell death                                      | GO:0012501 | 5.57E-11 |
| GO:BP | regulation of signal transduction                          | GO:0009966 | 6.37E-11 |
| GO:BP | negative regulation of intracellular signal transduction   | GO:1902532 | 6.73E-11 |
| GO:BP | regulation of immune system process                        | GO:0002682 | 6.73E-11 |
| GO:BP | positive regulation of response to stimulus                | GO:0048584 | 6.73E-11 |
| GO:BP | positive regulation of catalytic activity                  | GO:0043085 | 6.73E-11 |
| GO:BP | response to organic substance                              | GO:0010033 | 7.35E-11 |
| GO:BP | phosphorylation                                            | GO:0016310 | 7.36E-11 |
| GO:BP | regulation of cell migration                               | GO:0030334 | 1.00E-10 |
| GO:BP | peptide biosynthetic process                               | GO:0043043 | 1.20E-10 |
| GO:BP | regulation of protein modification process                 | GO:0031399 | 1.22E-10 |
| GO:BP | apoptotic process                                          | GO:0006915 | 2.44E-10 |
| GO:BP | response to other organism                                 | GO:0051707 | 2.44E-10 |
| GO:BP | response to biotic stimulus                                | GO:0009607 | 2.44E-10 |

|       |                                                                           |            |          |
|-------|---------------------------------------------------------------------------|------------|----------|
| GO:BP | proteolysis involved in protein catabolic process                         | GO:0051603 | 2.46E-10 |
| GO:BP | biological process involved in interspecies interaction between organisms | GO:0044419 | 2.62E-10 |
| GO:BP | nitrogen compound transport                                               | GO:0071705 | 2.79E-10 |
| GO:BP | protein phosphorylation                                                   | GO:0006468 | 3.24E-10 |
| GO:BP | organic substance transport                                               | GO:0071702 | 3.38E-10 |
| GO:BP | response to external biotic stimulus                                      | GO:0043207 | 3.94E-10 |
| GO:BP | post-translational protein modification                                   | GO:0043687 | 4.05E-10 |
| GO:BP | translation                                                               | GO:0006412 | 4.14E-10 |
| GO:BP | cellular component biogenesis                                             | GO:0044085 | 4.80E-10 |
| GO:BP | regulation of locomotion                                                  | GO:0040012 | 5.25E-10 |
| GO:BP | positive regulation of immune system process                              | GO:0002684 | 6.14E-10 |
| GO:BP | regulation of catabolic process                                           | GO:0009894 | 6.22E-10 |
| GO:BP | metabolic process                                                         | GO:0008152 | 7.36E-10 |
| GO:BP | developmental process                                                     | GO:0032502 | 7.49E-10 |
| GO:BP | regulation of multicellular organismal process                            | GO:0051239 | 1.04E-09 |
| GO:BP | modification-dependent macromolecule catabolic process                    | GO:0043632 | 1.52E-09 |
| GO:BP | regulation of developmental process                                       | GO:0050793 | 1.54E-09 |
| GO:BP | immune response                                                           | GO:0006955 | 1.78E-09 |
| GO:BP | modification-dependent protein catabolic process                          | GO:0019941 | 2.30E-09 |
| GO:BP | anatomical structure development                                          | GO:0048856 | 2.82E-09 |
| GO:BP | regulation of response to external stimulus                               | GO:0032101 | 3.03E-09 |
| GO:BP | ubiquitin-dependent protein catabolic process                             | GO:0006511 | 3.03E-09 |
| GO:BP | organic acid metabolic process                                            | GO:0006082 | 4.48E-09 |
| GO:BP | mitochondrion organization                                                | GO:0007005 | 4.70E-09 |
| GO:BP | regulation of immune response                                             | GO:0050776 | 4.79E-09 |
| GO:BP | regulation of cellular localization                                       | GO:0060341 | 5.63E-09 |
| GO:BP | dephosphorylation                                                         | GO:0016311 | 5.68E-09 |
| GO:BP | oxoacid metabolic process                                                 | GO:0043436 | 6.35E-09 |
| GO:BP | cellular response to organic substance                                    | GO:0071310 | 7.62E-09 |
| GO:BP | negative regulation of nitrogen compound metabolic process                | GO:0051172 | 9.03E-09 |
| GO:BP | defense response to other organism                                        | GO:0098542 | 9.29E-09 |
| GO:BP | negative regulation of signal transduction                                | GO:0009968 | 1.13E-08 |
| GO:BP | positive regulation of locomotion                                         | GO:0040017 | 1.13E-08 |
| GO:BP | regulation of protein serine/threonine kinase activity                    | GO:0071900 | 1.26E-08 |
| GO:BP | regulation of signaling                                                   | GO:0023051 | 1.37E-08 |
| GO:BP | vesicle-mediated transport                                                | GO:0016192 | 1.38E-08 |
| GO:BP | protein dephosphorylation                                                 | GO:0006470 | 1.45E-08 |
| GO:BP | carboxylic acid metabolic process                                         | GO:0019752 | 1.45E-08 |
| GO:BP | positive regulation of cell migration                                     | GO:0030335 | 2.04E-08 |
| GO:BP | positive regulation of cellular component organization                    | GO:0051130 | 2.06E-08 |
| GO:BP | cell motility                                                             | GO:0048870 | 2.22E-08 |
| GO:BP | regulation of cell communication                                          | GO:0010646 | 2.47E-08 |
| GO:BP | cell migration                                                            | GO:0016477 | 2.72E-08 |
| GO:BP | positive regulation of cell motility                                      | GO:2000147 | 3.07E-08 |
| GO:BP | negative regulation of protein metabolic process                          | GO:0051248 | 3.63E-08 |
| GO:BP | hemopoiesis                                                               | GO:0030097 | 4.01E-08 |
| GO:BP | negative regulation of biological process                                 | GO:0048519 | 4.20E-08 |
| GO:BP | regulation of phosphorus metabolic process                                | GO:0051174 | 4.44E-08 |
| GO:BP | regulation of phosphate metabolic process                                 | GO:0019220 | 4.93E-08 |
| GO:BP | regulation of localization                                                | GO:0032879 | 5.83E-08 |
| GO:BP | protein modification by small protein conjugation or removal              | GO:0070647 | 5.98E-08 |
| GO:BP | intracellular protein transport                                           | GO:0006886 | 6.28E-08 |
| GO:BP | cell surface receptor signaling pathway                                   | GO:0007166 | 7.70E-08 |
| GO:BP | protein localization to organelle                                         | GO:0033365 | 1.11E-07 |
| GO:BP | regulation of organelle organization                                      | GO:0033043 | 1.21E-07 |

|       |                                                                    |            |          |
|-------|--------------------------------------------------------------------|------------|----------|
| GO:BP | DNA damage response                                                | GO:0006974 | 1.33E-07 |
| GO:BP | regulation of amide metabolic process                              | GO:0034248 | 1.34E-07 |
| GO:BP | regulation of protein localization                                 | GO:0032880 | 1.34E-07 |
| GO:BP | negative regulation of signaling                                   | GO:0023057 | 1.45E-07 |
| GO:BP | regulation of cellular component biogenesis                        | GO:0044087 | 1.53E-07 |
| GO:BP | cellular component assembly                                        | GO:0022607 | 1.66E-07 |
| GO:BP | cell differentiation                                               | GO:0030154 | 1.80E-07 |
| GO:BP | cellular developmental process                                     | GO:0048869 | 1.80E-07 |
| GO:BP | organelle organization                                             | GO:0006996 | 2.08E-07 |
| GO:BP | cell adhesion                                                      | GO:0007155 | 2.25E-07 |
| GO:BP | protein modification by small protein conjugation                  | GO:0032446 | 2.25E-07 |
| GO:BP | proteasomal protein catabolic process                              | GO:0010498 | 2.57E-07 |
| GO:BP | regulation of programmed cell death                                | GO:0043067 | 2.88E-07 |
| GO:BP | negative regulation of cell communication                          | GO:0010648 | 3.62E-07 |
| GO:BP | regulation of phosphorylation                                      | GO:0042325 | 4.27E-07 |
| GO:BP | negative regulation of cellular process                            | GO:0048523 | 4.46E-07 |
| GO:BP | cellular lipid metabolic process                                   | GO:0044255 | 4.46E-07 |
| GO:BP | cell activation                                                    | GO:0001775 | 5.14E-07 |
| GO:BP | actin filament-based process                                       | GO:0030029 | 6.49E-07 |
| GO:BP | regulation of transferase activity                                 | GO:0051338 | 7.00E-07 |
| GO:BP | positive regulation of hydrolase activity                          | GO:0051345 | 7.51E-07 |
| GO:BP | positive regulation of catabolic process                           | GO:0009896 | 7.89E-07 |
| GO:BP | positive regulation of response to external stimulus               | GO:0032103 | 1.00E-06 |
| GO:BP | regulation of proteolysis                                          | GO:0030162 | 1.04E-06 |
| GO:BP | positive regulation of immune response                             | GO:0050778 | 1.12E-06 |
| GO:BP | ameboidal-type cell migration                                      | GO:0001667 | 1.14E-06 |
| GO:BP | immune response-regulating cell surface receptor signaling         | GO:0002768 | 1.16E-06 |
| GO:BP | regulation of kinase activity                                      | GO:0043549 | 1.22E-06 |
| GO:BP | response to oxygen-containing compound                             | GO:1901700 | 1.23E-06 |
| GO:BP | regulation of apoptotic process                                    | GO:0042981 | 1.25E-06 |
| GO:BP | defense response                                                   | GO:0006952 | 1.34E-06 |
| GO:BP | carbohydrate metabolic process                                     | GO:0005975 | 1.49E-06 |
| GO:BP | regulation of protein phosphorylation                              | GO:0001932 | 1.51E-06 |
| GO:BP | actin cytoskeleton organization                                    | GO:0030036 | 1.63E-06 |
| GO:BP | activation of immune response                                      | GO:0002253 | 1.69E-06 |
| GO:BP | proteasome-mediated ubiquitin-dependent protein catabolic process  | GO:0043161 | 1.87E-06 |
| GO:BP | regulation of cell adhesion                                        | GO:0030155 | 1.90E-06 |
| GO:BP | negative regulation of molecular function                          | GO:0044092 | 1.90E-06 |
| GO:BP | carbohydrate derivative metabolic process                          | GO:1901135 | 2.05E-06 |
| GO:BP | lipid metabolic process                                            | GO:0006629 | 2.14E-06 |
| GO:BP | protein maturation                                                 | GO:0051604 | 2.37E-06 |
| GO:BP | epithelial cell migration                                          | GO:0010631 | 2.40E-06 |
| GO:BP | immune response-activating cell surface receptor signaling pathway | GO:0002429 | 2.40E-06 |
| GO:BP | regulation of protein kinase activity                              | GO:0045859 | 2.74E-06 |
| GO:BP | regulation of hydrolase activity                                   | GO:0051336 | 2.92E-06 |
| GO:BP | organic substance metabolic process                                | GO:0071704 | 2.93E-06 |
| GO:BP | regulation of cellular catabolic process                           | GO:0031329 | 3.07E-06 |
| GO:BP | regulation of MAPK cascade                                         | GO:0043408 | 3.13E-06 |
| GO:BP | MAPK cascade                                                       | GO:0000165 | 3.55E-06 |
| GO:BP | leukocyte activation                                               | GO:0045321 | 3.57E-06 |
| GO:BP | regulation of cellular response to stress                          | GO:0080135 | 3.74E-06 |
| GO:BP | generation of precursor metabolites and energy                     | GO:0006091 | 3.74E-06 |
| GO:BP | tissue migration                                                   | GO:0090130 | 3.86E-06 |
| GO:BP | cellular metabolic process                                         | GO:0044237 | 4.01E-06 |
| GO:BP | regulation of biological quality                                   | GO:0065008 | 4.49E-06 |
| GO:BP | protein ubiquitination                                             | GO:0016567 | 4.49E-06 |

|       |                                                                 |            |          |
|-------|-----------------------------------------------------------------|------------|----------|
| GO:BP | myeloid cell differentiation                                    | GO:0030099 | 4.62E-06 |
| GO:BP | regulation of intracellular transport                           | GO:0032386 | 4.62E-06 |
| GO:BP | regulation of defense response                                  | GO:0031347 | 5.03E-06 |
| GO:BP | epithelium migration                                            | GO:0090132 | 5.16E-06 |
| GO:BP | regulation of protein-containing complex assembly               | GO:0043254 | 7.12E-06 |
| GO:BP | immune response-regulating signaling pathway                    | GO:0002764 | 7.15E-06 |
| GO:BP | positive regulation of protein serine/threonine kinase activity | GO:0071902 | 7.21E-06 |
| GO:BP | protein-DNA complex organization                                | GO:0071824 | 7.22E-06 |
| GO:BP | immune effector process                                         | GO:0002252 | 7.67E-06 |
| GO:BP | response to cytokine                                            | GO:0034097 | 8.50E-06 |
| GO:BP | cellular nitrogen compound biosynthetic process                 | GO:0044271 | 9.28E-06 |
| GO:BP | regulation of translation                                       | GO:0006417 | 9.39E-06 |
| GO:BP | cellular response to oxygen-containing compound                 | GO:1901701 | 9.68E-06 |
| GO:BP | apoptotic signaling pathway                                     | GO:0097190 | 9.72E-06 |
| GO:BP | regulation of cell differentiation                              | GO:0045595 | 1.07E-05 |
| GO:BP | chromatin organization                                          | GO:0006325 | 1.08E-05 |
| GO:BP | positive regulation of biosynthetic process                     | GO:0009891 | 1.26E-05 |
| GO:BP | protein-containing complex organization                         | GO:0043933 | 1.52E-05 |
| GO:BP | cytokine production                                             | GO:0001816 | 1.53E-05 |
| GO:BP | immune response-activating signaling pathway                    | GO:0002757 | 1.71E-05 |
| GO:BP | positive regulation of proteolysis                              | GO:0045862 | 1.73E-05 |
| GO:BP | multicellular organismal process                                | GO:0032501 | 2.04E-05 |
| GO:BP | positive regulation of cellular biosynthetic process            | GO:0031328 | 2.11E-05 |
| GO:BP | endocytosis                                                     | GO:0006897 | 2.15E-05 |
| GO:BP | circulatory system development                                  | GO:0072359 | 2.15E-05 |
| GO:BP | regulation of cell population proliferation                     | GO:0042127 | 2.25E-05 |
| GO:BP | actin filament organization                                     | GO:0007015 | 2.38E-05 |
| GO:BP | response to lipid                                               | GO:0033993 | 2.60E-05 |
| GO:BP | regulation of cytokine production                               | GO:0001817 | 2.72E-05 |
| GO:BP | positive regulation of cell adhesion                            | GO:0045785 | 2.74E-05 |
| GO:BP | positive regulation of protein modification process             | GO:0031401 | 2.76E-05 |
| GO:BP | process utilizing autophagic mechanism                          | GO:0061919 | 2.76E-05 |
| GO:BP | autophagy                                                       | GO:0006914 | 2.76E-05 |
| GO:BP | cell cycle                                                      | GO:0007049 | 2.76E-05 |
| GO:BP | muscle structure development                                    | GO:0061061 | 2.99E-05 |
| GO:BP | regulation of actin cytoskeleton organization                   | GO:0032956 | 3.05E-05 |
| GO:BP | muscle cell differentiation                                     | GO:0042692 | 3.33E-05 |
| GO:BP | chromatin remodeling                                            | GO:0006338 | 3.38E-05 |
| GO:BP | supramolecular fiber organization                               | GO:0097435 | 3.40E-05 |
| GO:BP | negative regulation of protein modification process             | GO:0031400 | 3.45E-05 |
| GO:BP | small molecule catabolic process                                | GO:0044282 | 3.50E-05 |
| GO:BP | homeostatic process                                             | GO:0042592 | 3.59E-05 |
| GO:BP | membrane organization                                           | GO:0061024 | 3.80E-05 |
| GO:BP | enzyme-linked receptor protein signaling pathway                | GO:0007167 | 3.93E-05 |
| GO:BP | alcohol metabolic process                                       | GO:0006066 | 4.64E-05 |
| GO:BP | regulation of transport                                         | GO:0051049 | 4.75E-05 |
| GO:BP | regulation of epithelial cell migration                         | GO:0010632 | 5.04E-05 |
| GO:BP | peptidyl-amino acid modification                                | GO:0018193 | 5.25E-05 |
| GO:BP | tissue development                                              | GO:0009888 | 5.25E-05 |
| GO:BP | positive regulation of macromolecule biosynthetic process       | GO:0010557 | 5.25E-05 |
| GO:BP | regulation of MAP kinase activity                               | GO:0043405 | 5.28E-05 |
| GO:BP | innate immune response                                          | GO:0045087 | 5.30E-05 |
| GO:BP | regulation of actin filament-based process                      | GO:0032970 | 5.69E-05 |
| GO:BP | regulation of actin filament organization                       | GO:0110053 | 5.76E-05 |
| GO:BP | lipid biosynthetic process                                      | GO:0008610 | 5.76E-05 |
| GO:BP | regulation of cell cycle                                        | GO:0051726 | 5.76E-05 |

|       |                                                          |            |           |
|-------|----------------------------------------------------------|------------|-----------|
| GO:BP | regulation of cell activation                            | GO:0050865 | 5.78E-05  |
| GO:BP | response to oxidative stress                             | GO:0006979 | 5.78E-05  |
| GO:BP | ncRNA processing                                         | GO:0034470 | 6.06E-05  |
| GO:BP | proteolysis                                              | GO:0006508 | 6.58E-05  |
| GO:BP | nuclear transport                                        | GO:0051169 | 6.86E-05  |
| GO:BP | monocarboxylic acid metabolic process                    | GO:0032787 | 7.27E-05  |
| GO:BP | positive regulation of gene expression                   | GO:0010628 | 7.38E-05  |
| GO:BP | nucleocytoplasmic transport                              | GO:0006913 | 7.90E-05  |
| GO:BP | regulation of metabolic process                          | GO:0019222 | 8.07E-05  |
| GO:BP | cell population proliferation                            | GO:0008283 | 8.20E-05  |
| GO:BP | oxidative phosphorylation                                | GO:0006119 | 8.52E-05  |
| GO:BP | regulation of multicellular organismal development       | GO:2000026 | 8.87E-05  |
| GO:BP | response to abiotic stimulus                             | GO:0009628 | 9.24E-05  |
| GO:BP | vasculature development                                  | GO:0001944 | 9.27E-05  |
| GO:BP | cellular response to cytokine stimulus                   | GO:0071345 | 9.47E-05  |
| GO:BP | lymphocyte activation                                    | GO:0046649 | 9.65E-05  |
| GO:BP | aerobic respiration                                      | GO:0009060 | 0.0001117 |
| GO:BP | multicellular organism development                       | GO:0007275 | 0.0001132 |
| GO:BP | cell development                                         | GO:0048468 | 0.0001163 |
| GO:BP | ncRNA metabolic process                                  | GO:0034660 | 0.0001202 |
| GO:BP | actomyosin structure organization                        | GO:0031032 | 0.0001279 |
| GO:BP | cellular response to biotic stimulus                     | GO:0071216 | 0.0001386 |
| GO:BP | positive regulation of phosphorus metabolic process      | GO:0010562 | 0.0001453 |
| GO:BP | positive regulation of phosphate metabolic process       | GO:0045937 | 0.0001453 |
| GO:BP | response to molecule of bacterial origin                 | GO:0002237 | 0.0001509 |
| GO:BP | cellular respiration                                     | GO:0045333 | 0.0001522 |
| GO:BP | electron transport chain                                 | GO:0022900 | 0.0001698 |
| GO:BP | regulation of supramolecular fiber organization          | GO:1902903 | 0.0001805 |
| GO:BP | phagocytosis                                             | GO:0006909 | 0.000182  |
| GO:BP | regulation of leukocyte activation                       | GO:0002694 | 0.0002033 |
| GO:BP | glycoprotein metabolic process                           | GO:0009100 | 0.0002072 |
| GO:BP | positive regulation of protein localization              | GO:1903829 | 0.0002073 |
| GO:BP | regulation of lipid metabolic process                    | GO:0019216 | 0.0002073 |
| GO:BP | sulfur compound metabolic process                        | GO:0006790 | 0.0002148 |
| GO:BP | negative regulation of response to external stimulus     | GO:0032102 | 0.000218  |
| GO:BP | production of molecular mediator of immune response      | GO:0002440 | 0.000218  |
| GO:BP | signal transduction in response to DNA damage            | GO:0042770 | 0.000218  |
| GO:BP | anatomical structure formation involved in morphogenesis | GO:0048646 | 0.0002342 |
| GO:BP | regulation of establishment of protein localization      | GO:0070201 | 0.0002484 |
| GO:BP | myeloid leukocyte differentiation                        | GO:0002573 | 0.0002536 |
| GO:BP | negative regulation of MAPK cascade                      | GO:0043409 | 0.0002567 |
| GO:BP | establishment of protein localization to organelle       | GO:0072594 | 0.0002721 |
| GO:BP | small molecule biosynthetic process                      | GO:0044283 | 0.0002839 |
| GO:BP | leukocyte differentiation                                | GO:0002521 | 0.0002844 |
| GO:BP | positive regulation of defense response                  | GO:0031349 | 0.0003004 |
| GO:BP | regulation of immune effector process                    | GO:0002697 | 0.0003031 |
| GO:BP | hematopoietic progenitor cell differentiation            | GO:0002244 | 0.0003048 |
| GO:BP | negative regulation of multicellular organismal process  | GO:0051241 | 0.0003149 |
| GO:BP | positive regulation of cellular catabolic process        | GO:0031331 | 0.000317  |
| GO:BP | regulation of autophagy                                  | GO:0010506 | 0.0003193 |
| GO:BP | blood vessel development                                 | GO:0001568 | 0.0003357 |
| GO:BP | positive regulation of signal transduction               | GO:0009967 | 0.000353  |
| GO:BP | positive regulation of intracellular signal transduction | GO:1902533 | 0.0003649 |
| GO:BP | positive regulation of transferase activity              | GO:0051347 | 0.0003844 |
| GO:BP | response to lipopolysaccharide                           | GO:0032496 | 0.0003955 |
| GO:BP | growth                                                   | GO:0040007 | 0.0004033 |

|       |                                                                   |            |           |
|-------|-------------------------------------------------------------------|------------|-----------|
| GO:BP | small GTPase mediated signal transduction                         | GO:0007264 | 0.0004615 |
| GO:BP | glycerophospholipid metabolic process                             | GO:0006650 | 0.0004622 |
| GO:BP | protein localization to nucleus                                   | GO:0034504 | 0.0004693 |
| GO:BP | regulation of protein transport                                   | GO:0051223 | 0.0004693 |
| GO:BP | cell-substrate adhesion                                           | GO:0031589 | 0.0004693 |
| GO:BP | regulation of anatomical structure morphogenesis                  | GO:0022603 | 0.0004714 |
| GO:BP | positive regulation of cellular component biogenesis              | GO:0044089 | 0.0004782 |
| GO:BP | angiogenesis                                                      | GO:0001525 | 0.0004782 |
| GO:BP | positive regulation of kinase activity                            | GO:0033674 | 0.000491  |
| GO:BP | positive regulation of transport                                  | GO:0051050 | 0.0005144 |
| GO:BP | cell cycle process                                                | GO:0022402 | 0.0005215 |
| GO:BP | cellular response to lipid                                        | GO:0071396 | 0.0005611 |
| GO:BP | import into cell                                                  | GO:0098657 | 0.0005783 |
| GO:BP | response to endogenous stimulus                                   | GO:0009719 | 0.0005879 |
| GO:BP | regulation of ERK1 and ERK2 cascade                               | GO:0070372 | 0.0005886 |
| GO:BP | response to bacterium                                             | GO:0009617 | 0.0006016 |
| GO:BP | antigen receptor-mediated signaling pathway                       | GO:0050851 | 0.0006018 |
| GO:BP | endothelial cell migration                                        | GO:0043542 | 0.0006117 |
| GO:BP | localization within membrane                                      | GO:0051668 | 0.0006398 |
| GO:BP | positive regulation of cell population proliferation              | GO:0008284 | 0.0006723 |
| GO:BP | positive regulation of cytokine production                        | GO:0001819 | 0.0007014 |
| GO:BP | blood vessel morphogenesis                                        | GO:0048514 | 0.0007089 |
| GO:BP | regulation of production of molecular mediator of immune response | GO:0002700 | 0.0007144 |
| GO:BP | cellular response to endogenous stimulus                          | GO:0071495 | 0.0007847 |
| GO:BP | regulation of protein binding                                     | GO:0043393 | 0.000813  |
| GO:BP | positive regulation of cell activation                            | GO:0050867 | 0.0008511 |
| GO:BP | negative regulation of cell motility                              | GO:2000146 | 0.0008511 |
| GO:BP | negative regulation of cellular component organization            | GO:0051129 | 0.0008511 |
| GO:BP | energy derivation by oxidation of organic compounds               | GO:0015980 | 0.0008762 |
| GO:BP | tube development                                                  | GO:0035295 | 0.0008762 |
| GO:BP | regulation of response to biotic stimulus                         | GO:0002831 | 0.0009324 |
| GO:BP | muscle cell development                                           | GO:0055001 | 0.0009346 |
| GO:BP | regulation of binding                                             | GO:0051098 | 0.0009669 |
| GO:BP | transmembrane receptor protein tyrosine kinase signaling pathway  | GO:0007169 | 0.0009974 |
| GO:BP | positive regulation of phosphorylation                            | GO:0042327 | 0.0010027 |
| GO:BP | regulation of cell cycle process                                  | GO:0010564 | 0.0010027 |
| GO:BP | myoblast differentiation                                          | GO:0045445 | 0.0010583 |
| GO:BP | Ras protein signal transduction                                   | GO:0007265 | 0.0011299 |
| GO:BP | negative regulation of locomotion                                 | GO:0040013 | 0.0011329 |
| GO:BP | cellular response to molecule of bacterial origin                 | GO:0071219 | 0.0011678 |
| GO:BP | regulation of ubiquitin-dependent protein catabolic process       | GO:2000058 | 0.0011771 |
| GO:BP | inflammatory response                                             | GO:0006954 | 0.0012097 |
| GO:BP | DNA repair                                                        | GO:0006281 | 0.0012526 |
| GO:BP | cellular response to oxidative stress                             | GO:0034599 | 0.0012665 |
| GO:BP | organophosphate metabolic process                                 | GO:0019637 | 0.0012665 |
| GO:BP | respiratory electron transport chain                              | GO:0022904 | 0.0012714 |
| GO:BP | regulation of protein catabolic process                           | GO:0042176 | 0.0012714 |
| GO:BP | ERK1 and ERK2 cascade                                             | GO:0070371 | 0.0012724 |
| GO:BP | positive regulation of organelle organization                     | GO:0010638 | 0.001319  |
| GO:BP | ATP synthesis coupled electron transport                          | GO:0042773 | 0.001319  |
| GO:BP | negative regulation of programmed cell death                      | GO:0043069 | 0.0013929 |
| GO:BP | leukocyte mediated immunity                                       | GO:0002443 | 0.0014069 |
| GO:BP | regulation of endothelial cell migration                          | GO:0010594 | 0.0014141 |
| GO:BP | fatty acid metabolic process                                      | GO:0006631 | 0.0014219 |
| GO:BP | positive regulation of protein kinase activity                    | GO:0045860 | 0.0014262 |
| GO:BP | regulation of intracellular protein transport                     | GO:0033157 | 0.0014346 |



|       |                                                                                                                           |            |           |
|-------|---------------------------------------------------------------------------------------------------------------------------|------------|-----------|
| GO:BP | positive regulation of cell-cell adhesion                                                                                 | GO:0022409 | 0.0014366 |
| GO:BP | striated muscle cell differentiation                                                                                      | GO:0051146 | 0.001479  |
| GO:BP | regulation of endopeptidase activity                                                                                      | GO:0052548 | 0.001479  |
| GO:BP | positive regulation of nucleobase-containing compound metabolic process                                                   | GO:0045935 | 0.0015721 |
| GO:BP | organophosphate ester transport                                                                                           | GO:0015748 | 0.0015759 |
| GO:BP | regulation of proteolysis involved in protein catabolic process                                                           | GO:1903050 | 0.0015951 |
| GO:BP | cellular response to lipopolysaccharide                                                                                   | GO:0071222 | 0.0016132 |
| GO:BP | negative regulation of developmental process                                                                              | GO:0051093 | 0.0016265 |
| GO:BP | positive regulation of programmed cell death                                                                              | GO:0043068 | 0.0016293 |
| GO:BP | regulation of cytoskeleton organization                                                                                   | GO:0051493 | 0.0018038 |
| GO:BP | macroautophagy                                                                                                            | GO:0016236 | 0.0018038 |
| GO:BP | positive regulation of leukocyte activation                                                                               | GO:0002696 | 0.0018054 |
| GO:BP | negative regulation of protein serine/threonine kinase activity                                                           | GO:0071901 | 0.0018054 |
| GO:BP | lymphocyte mediated immunity                                                                                              | GO:0002449 | 0.0018054 |
| GO:BP | response to endoplasmic reticulum stress                                                                                  | GO:0034976 | 0.0018054 |
| GO:BP | positive regulation of apoptotic process                                                                                  | GO:0043065 | 0.0018054 |
| GO:BP | glycosylation                                                                                                             | GO:0070085 | 0.0018054 |
| GO:BP | leukocyte migration                                                                                                       | GO:0050900 | 0.0018082 |
| GO:BP | glycoprotein biosynthetic process                                                                                         | GO:0009101 | 0.0018146 |
| GO:BP | negative regulation of protein-containing complex assembly                                                                | GO:0031333 | 0.0018964 |
| GO:BP | receptor metabolic process                                                                                                | GO:0043112 | 0.0019104 |
| GO:BP | mitochondrial ATP synthesis coupled electron transport                                                                    | GO:0042775 | 0.0019104 |
| GO:BP | actin filament bundle organization                                                                                        | GO:0061572 | 0.0019775 |
| GO:BP | negative regulation of cell migration                                                                                     | GO:0030336 | 0.0020456 |
| GO:BP | carbohydrate derivative biosynthetic process                                                                              | GO:1901137 | 0.0020667 |
| GO:BP | positive regulation of ERK1 and ERK2 cascade                                                                              | GO:0070374 | 0.0021531 |
| GO:BP | tube morphogenesis                                                                                                        | GO:0035239 | 0.0021868 |
| GO:BP | membrane protein proteolysis                                                                                              | GO:0033619 | 0.0022425 |
| GO:BP | activation of GTPase activity                                                                                             | GO:0090630 | 0.0022425 |
| GO:BP | response to UV                                                                                                            | GO:0009411 | 0.0023059 |
| GO:BP | positive regulation of supramolecular fiber organization                                                                  | GO:1902905 | 0.0023059 |
| GO:BP | regulation of protein dephosphorylation                                                                                   | GO:0035304 | 0.0023274 |
| GO:BP | ribosome biogenesis                                                                                                       | GO:0042254 | 0.0023337 |
| GO:BP | positive regulation of multicellular organismal process                                                                   | GO:0051240 | 0.0023574 |
| GO:BP | response to stimulus                                                                                                      | GO:0050896 | 0.0023574 |
| GO:BP | positive regulation of protein phosphorylation                                                                            | GO:0001934 | 0.002376  |
| GO:BP | regulation of cellular component size                                                                                     | GO:0032535 | 0.0023992 |
| GO:BP | methylation                                                                                                               | GO:0032259 | 0.0024451 |
| GO:BP | regulation of growth                                                                                                      | GO:0040008 | 0.0024451 |
| GO:BP | regulation of protein polymerization                                                                                      | GO:0032271 | 0.0024497 |
| GO:BP | adaptive immune response based on somatic recombination of immune receptors built from immunoglobulin superfamily domains | GO:0002460 | 0.0024614 |
| GO:BP | positive regulation of MAP kinase activity                                                                                | GO:0043406 | 0.0024733 |
| GO:BP | negative regulation of apoptotic process                                                                                  | GO:0043066 | 0.0024942 |
| GO:BP | actin filament bundle assembly                                                                                            | GO:0051017 | 0.0026543 |
| GO:BP | negative regulation of phosphorus metabolic process                                                                       | GO:0010563 | 0.0026802 |
| GO:BP | negative regulation of phosphate metabolic process                                                                        | GO:0045936 | 0.0026802 |
| GO:BP | intrinsic apoptotic signaling pathway                                                                                     | GO:0097193 | 0.0026918 |
| GO:BP | regulation of angiogenesis                                                                                                | GO:0045765 | 0.0027361 |
| GO:BP | regulation of innate immune response                                                                                      | GO:0045088 | 0.0027361 |
| GO:BP | positive regulation of intracellular transport                                                                            | GO:0032388 | 0.0027427 |
| GO:BP | negative regulation of nucleobase-containing compound metabolic process                                                   | GO:0045934 | 0.0027427 |
| GO:BP | positive regulation of endopeptidase activity                                                                             | GO:0010950 | 0.0028542 |
| GO:BP | anatomical structure morphogenesis                                                                                        | GO:0009653 | 0.0028542 |

|       |                                                               |            |           |
|-------|---------------------------------------------------------------|------------|-----------|
| GO:BP | positive regulation of innate immune response                 | GO:0045089 | 0.0028772 |
| GO:BP | positive regulation of developmental process                  | GO:0051094 | 0.002911  |
| GO:BP | T cell receptor signaling pathway                             | GO:0050852 | 0.002911  |
| GO:BP | phospholipid transport                                        | GO:0015914 | 0.002911  |
| GO:BP | positive regulation of GTPase activity                        | GO:0043547 | 0.0029775 |
| GO:BP | aminoglycan metabolic process                                 | GO:0006022 | 0.0029948 |
| GO:BP | protein glycosylation                                         | GO:0006486 | 0.0030567 |
| GO:BP | macromolecule glycosylation                                   | GO:0043413 | 0.0030567 |
| GO:BP | monosaccharide metabolic process                              | GO:0005996 | 0.0030567 |
| GO:BP | positive regulation of protein catabolic process              | GO:0045732 | 0.0030583 |
| GO:BP | response to oxygen levels                                     | GO:0070482 | 0.0030583 |
| GO:BP | regulation of cysteine-type endopeptidase activity            | GO:2000116 | 0.0031369 |
| GO:BP | cell-matrix adhesion                                          | GO:0007160 | 0.0031369 |
| GO:BP | positive regulation of immune effector process                | GO:0002699 | 0.0031766 |
| GO:BP | RNA modification                                              | GO:0009451 | 0.0031766 |
| GO:BP | glycerolipid metabolic process                                | GO:0046486 | 0.0032203 |
| GO:BP | mononuclear cell differentiation                              | GO:1903131 | 0.0032203 |
| GO:BP | signal transduction by p53 class mediator                     | GO:0072331 | 0.0032664 |
| GO:BP | negative regulation of defense response                       | GO:0031348 | 0.0033451 |
| GO:BP | regulation of hemopoiesis                                     | GO:1903706 | 0.0034128 |
| GO:BP | macromolecule methylation                                     | GO:0043414 | 0.0034321 |
| GO:BP | positive regulation of response to biotic stimulus            | GO:0002833 | 0.0034443 |
| GO:BP | positive regulation of peptidase activity                     | GO:0010952 | 0.0034715 |
| GO:BP | regulation of cytokine production involved in immune response | GO:0002718 | 0.0035965 |
| GO:BP | cytokine production involved in immune response               | GO:0002367 | 0.0035965 |
| GO:BP | positive regulation of establishment of protein localization  | GO:1904951 | 0.003742  |
| GO:BP | positive regulation of protein transport                      | GO:0051222 | 0.0038696 |
| GO:BP | regulation of lymphocyte activation                           | GO:0051249 | 0.0039728 |
| GO:BP | cytoplasmic translation                                       | GO:0002181 | 0.0040873 |
| GO:BP | mitotic cell cycle process                                    | GO:1903047 | 0.0041397 |
| GO:BP | endosomal transport                                           | GO:0016197 | 0.0041397 |
| GO:BP | regulation of vasculature development                         | GO:1901342 | 0.0041397 |
| GO:BP | regulation of dephosphorylation                               | GO:0035303 | 0.0041875 |
| GO:BP | wound healing                                                 | GO:0042060 | 0.0043561 |
| GO:BP | endomembrane system organization                              | GO:0010256 | 0.0044506 |
| GO:BP | response to wounding                                          | GO:0009611 | 0.004624  |
| GO:BP | cellular homeostasis                                          | GO:0019725 | 0.0048635 |
| GO:BP | retrograde transport, endosome to Golgi                       | GO:0042147 | 0.0048828 |
| GO:BP | positive regulation of epithelial cell migration              | GO:0010634 | 0.0048942 |
| GO:BP | Rho protein signal transduction                               | GO:0007266 | 0.0049829 |
| GO:BP | maintenance of location                                       | GO:0051235 | 0.0050512 |
| GO:BP | mitochondrial membrane organization                           | GO:0007006 | 0.0052537 |
| GO:BP | phospholipid metabolic process                                | GO:0006644 | 0.0053016 |
| GO:BP | positive regulation of signaling                              | GO:0023056 | 0.0054618 |
| GO:BP | regulation of actin polymerization or depolymerization        | GO:0008064 | 0.0055061 |
| GO:BP | regulation of actin filament length                           | GO:0030832 | 0.0055061 |
| GO:BP | extracellular structure organization                          | GO:0043062 | 0.0056324 |
| GO:BP | actin polymerization or depolymerization                      | GO:0008154 | 0.0056324 |
| GO:BP | external encapsulating structure organization                 | GO:0045229 | 0.0056324 |
| GO:BP | translational initiation                                      | GO:0006413 | 0.0056324 |
| GO:BP | regulation of chromosome organization                         | GO:0033044 | 0.0056742 |
| GO:BP | regulation of protein stability                               | GO:0031647 | 0.0057371 |
| GO:BP | mitotic cell cycle                                            | GO:0000278 | 0.0059008 |
| GO:BP | cell growth                                                   | GO:0016049 | 0.0059008 |
| GO:BP | non-membrane-bounded organelle assembly                       | GO:0140694 | 0.0059008 |
| GO:BP | aerobic electron transport chain                              | GO:0019646 | 0.0059043 |

|       |                                                                            |            |           |
|-------|----------------------------------------------------------------------------|------------|-----------|
| GO:BP | protein polymerization                                                     | GO:0051258 | 0.0059521 |
| GO:BP | transcription by RNA polymerase III                                        | GO:0006383 | 0.0061684 |
| GO:BP | positive regulation of dephosphorylation                                   | GO:0035306 | 0.0061684 |
| GO:BP | apoptotic mitochondrial changes                                            | GO:0008637 | 0.0062183 |
| GO:BP | extracellular matrix organization                                          | GO:0030198 | 0.006252  |
| GO:BP | response to radiation                                                      | GO:0009314 | 0.0063581 |
| GO:BP | positive regulation of lymphocyte activation                               | GO:0051251 | 0.006366  |
| GO:BP | positive regulation of MAPK cascade                                        | GO:0043410 | 0.006442  |
| GO:BP | negative regulation of immune system process                               | GO:0002683 | 0.0065108 |
| GO:BP | glycosaminoglycan metabolic process                                        | GO:0030203 | 0.0065108 |
| GO:BP | chromosome organization                                                    | GO:0051276 | 0.0065108 |
| GO:BP | organelle localization                                                     | GO:0051640 | 0.0067539 |
| GO:BP | mucopolysaccharide metabolic process                                       | GO:1903510 | 0.0067726 |
| GO:BP | negative regulation of catalytic activity                                  | GO:0043086 | 0.0069053 |
| GO:BP | positive regulation of cell communication                                  | GO:0010647 | 0.0070131 |
| GO:BP | multicellular organismal-level homeostasis                                 | GO:0048871 | 0.0070204 |
| GO:BP | regulation of cell growth                                                  | GO:0001558 | 0.0070582 |
| GO:BP | skeletal muscle tissue development                                         | GO:0007519 | 0.0071535 |
| GO:BP | protein autophosphorylation                                                | GO:0046777 | 0.0071535 |
| GO:BP | regulation of proteasomal ubiquitin-dependent protein catabolic            | GO:0032434 | 0.007229  |
| GO:BP | negative regulation of RNA biosynthetic process                            | GO:1902679 | 0.007229  |
| GO:BP | protein localization to membrane                                           | GO:0072657 | 0.00725   |
| GO:BP | regulation of Ras protein signal transduction                              | GO:0046578 | 0.00725   |
| GO:BP | myeloid leukocyte migration                                                | GO:0097529 | 0.00725   |
| GO:BP | negative regulation of amide metabolic process                             | GO:0034249 | 0.007518  |
| GO:BP | mitochondrial transport                                                    | GO:0006839 | 0.0075493 |
| GO:BP | protein processing                                                         | GO:0016485 | 0.0075871 |
| GO:BP | cell cycle phase transition                                                | GO:0044770 | 0.0076886 |
| GO:BP | regulation of cellular metabolic process                                   | GO:0031323 | 0.0077303 |
| GO:BP | cell chemotaxis                                                            | GO:0060326 | 0.0077303 |
| GO:BP | taxis                                                                      | GO:0042330 | 0.0078981 |
| GO:BP | positive regulation of production of molecular mediator of immune response | GO:0002702 | 0.0078981 |
| GO:BP | regulation of cell-matrix adhesion                                         | GO:0001952 | 0.0078981 |
| GO:BP | regulation of mitochondrion organization                                   | GO:0010821 | 0.0080138 |
| GO:BP | positive regulation of autophagy                                           | GO:0010508 | 0.0084001 |
| GO:BP | regulation of macromolecule metabolic process                              | GO:0060255 | 0.0084684 |
| GO:BP | regulation of proteasomal protein catabolic process                        | GO:0061136 | 0.0084914 |
| GO:BP | platelet-derived growth factor receptor signaling pathway                  | GO:0048008 | 0.0084914 |
| GO:BP | negative regulation of DNA-templated transcription                         | GO:0045892 | 0.0085924 |
| GO:BP | regulation of DNA metabolic process                                        | GO:0051052 | 0.0087044 |
| GO:BP | B cell mediated immunity                                                   | GO:0019724 | 0.0087162 |
| GO:BP | phosphatidylinositol metabolic process                                     | GO:0046488 | 0.0088969 |
| GO:BP | regulation of small GTPase mediated signal transduction                    | GO:0051056 | 0.0091103 |
| GO:BP | regulation of inflammatory response                                        | GO:0050727 | 0.0091815 |
| GO:BP | sterol metabolic process                                                   | GO:0016125 | 0.0092948 |
| GO:BP | tRNA processing                                                            | GO:0008033 | 0.0095779 |
| GO:BP | carboxylic acid catabolic process                                          | GO:0046395 | 0.0095779 |
| GO:BP | regulation of myeloid cell differentiation                                 | GO:0045637 | 0.0095779 |
| GO:BP | chemotaxis                                                                 | GO:0006935 | 0.0095779 |
| GO:BP | regulation of leukocyte mediated immunity                                  | GO:0002703 | 0.0095779 |
| GO:BP | organic acid catabolic process                                             | GO:0016054 | 0.0095779 |
| GO:BP | import into nucleus                                                        | GO:0051170 | 0.0095779 |
| GO:BP | cellular response to chemical stress                                       | GO:0062197 | 0.009653  |
| GO:BP | negative regulation of catabolic process                                   | GO:0009895 | 0.0096781 |
| GO:BP | skeletal muscle organ development                                          | GO:0060538 | 0.0100578 |

|       |                                                                           |            |           |
|-------|---------------------------------------------------------------------------|------------|-----------|
| GO:BP | coagulation                                                               | GO:0050817 | 0.0100578 |
| GO:BP | mitochondrial respiratory chain complex I assembly                        | GO:0032981 | 0.0101597 |
| GO:BP | cellular response to oxygen levels                                        | GO:0071453 | 0.0101597 |
| GO:BP | NADH dehydrogenase complex assembly                                       | GO:0010257 | 0.0101597 |
| GO:BP | regulation of cell-cell adhesion                                          | GO:0022407 | 0.0102096 |
| GO:BP | immunoglobulin mediated immune response                                   | GO:0016064 | 0.0103014 |
| GO:BP | leukocyte chemotaxis                                                      | GO:0030595 | 0.0103896 |
| GO:BP | positive regulation of leukocyte cell-cell adhesion                       | GO:1903039 | 0.0103896 |
| GO:BP | nucleobase-containing compound transport                                  | GO:0015931 | 0.0103896 |
| GO:BP | regulation of actin filament polymerization                               | GO:0030833 | 0.0106322 |
| GO:BP | positive regulation of intracellular protein transport                    | GO:0090316 | 0.0106322 |
| GO:BP | response to growth factor                                                 | GO:0070848 | 0.01066   |
| GO:BP | positive regulation of RNA metabolic process                              | GO:0051254 | 0.01066   |
| GO:BP | actin filament polymerization                                             | GO:0030041 | 0.0108625 |
| GO:BP | myeloid leukocyte cytokine production                                     | GO:0061082 | 0.011109  |
| GO:BP | membrane invagination                                                     | GO:0010324 | 0.011109  |
| GO:BP | activation of innate immune response                                      | GO:0002218 | 0.0111935 |
| GO:BP | lipid modification                                                        | GO:0030258 | 0.0113057 |
| GO:BP | cellular response to growth factor stimulus                               | GO:0071363 | 0.0115053 |
| GO:BP | cellular response to external stimulus                                    | GO:0071496 | 0.011576  |
| GO:BP | regulation of GTPase activity                                             | GO:0043087 | 0.0116956 |
| GO:BP | negative regulation of RNA metabolic process                              | GO:0051253 | 0.0116956 |
| GO:BP | endothelium development                                                   | GO:0003158 | 0.0116956 |
| GO:BP | protein localization to plasma membrane                                   | GO:0072659 | 0.0116956 |
| GO:BP | positive regulation of T cell proliferation                               | GO:0042102 | 0.0121473 |
| GO:BP | positive regulation of cytokine production involved in immune             | GO:0002720 | 0.0121473 |
| GO:BP | positive regulation of cysteine-type endopeptidase activity               | GO:2001056 | 0.0122487 |
| GO:BP | TOR signaling                                                             | GO:0031929 | 0.0124377 |
| GO:BP | cell cycle checkpoint signaling                                           | GO:0000075 | 0.0128508 |
| GO:BP | regulation of peptidase activity                                          | GO:0052547 | 0.01286   |
| GO:BP | negative regulation of protein phosphorylation                            | GO:0001933 | 0.0129959 |
| GO:BP | phospholipid biosynthetic process                                         | GO:0008654 | 0.013013  |
| GO:BP | regulation of cell development                                            | GO:0060284 | 0.0131008 |
| GO:BP | fat cell differentiation                                                  | GO:0045444 | 0.013387  |
| GO:BP | negative regulation of transferase activity                               | GO:0051348 | 0.013387  |
| GO:BP | regulation of cell-substrate adhesion                                     | GO:0010810 | 0.0135317 |
| GO:BP | innate immune response activating cell surface receptor signaling pathway | GO:0002220 | 0.0135349 |
| GO:BP | regulation of phosphoprotein phosphatase activity                         | GO:0043666 | 0.0135349 |
| GO:BP | response to organonitrogen compound                                       | GO:0010243 | 0.0135349 |
| GO:BP | membrane protein ectodomain proteolysis                                   | GO:0006509 | 0.0135349 |
| GO:BP | phosphatidylinositol 3-kinase/protein kinase B signal transduction        | GO:0043491 | 0.0136064 |
| GO:BP | response to decreased oxygen levels                                       | GO:0036293 | 0.0136064 |
| GO:BP | response to organic cyclic compound                                       | GO:0014070 | 0.0136842 |
| GO:BP | response to reactive oxygen species                                       | GO:0000302 | 0.0137612 |
| GO:BP | myeloid leukocyte activation                                              | GO:0002274 | 0.0137612 |
| GO:BP | protein import into nucleus                                               | GO:0006606 | 0.0141277 |
| GO:BP | homeostasis of number of cells                                            | GO:0048872 | 0.0142167 |
| GO:BP | blood coagulation                                                         | GO:0007596 | 0.0143945 |
| GO:BP | regulation of endocytosis                                                 | GO:0030100 | 0.0144203 |
| GO:BP | protein transmembrane transport                                           | GO:0071806 | 0.0144891 |
| GO:BP | regulation of anatomical structure size                                   | GO:0090066 | 0.0145386 |
| GO:BP | B cell activation involved in immune response                             | GO:0002312 | 0.0149741 |
| GO:BP | rRNA processing                                                           | GO:0006364 | 0.0150917 |
| GO:BP | cytoskeleton-dependent intracellular transport                            | GO:0030705 | 0.0150917 |
| GO:BP | negative regulation of phosphorylation                                    | GO:0042326 | 0.0155454 |

|       |                                                                                  |            |           |
|-------|----------------------------------------------------------------------------------|------------|-----------|
| GO:BP | contractile actin filament bundle assembly                                       | GO:0030038 | 0.0156057 |
| GO:BP | stress fiber assembly                                                            | GO:0043149 | 0.0156057 |
| GO:BP | positive regulation of endocytosis                                               | GO:0045807 | 0.0156057 |
| GO:BP | positive regulation of amide metabolic process                                   | GO:0034250 | 0.0156468 |
| GO:BP | positive regulation of T cell activation                                         | GO:0050870 | 0.0156468 |
| GO:BP | regulation of cysteine-type endopeptidase activity involved in apoptotic process | GO:0043281 | 0.0162961 |
| GO:BP | regulation of cell cycle phase transition                                        | GO:1901987 | 0.0164468 |
| GO:BP | endothelial cell differentiation                                                 | GO:0045446 | 0.0169839 |
| GO:BP | cholesterol metabolic process                                                    | GO:0008203 | 0.0169839 |
| GO:BP | organelle assembly                                                               | GO:0070925 | 0.0176201 |
| GO:BP | T cell activation                                                                | GO:0042110 | 0.0176321 |
| GO:BP | RNA methylation                                                                  | GO:0001510 | 0.0176554 |
| GO:BP | DNA-templated transcription elongation                                           | GO:0006354 | 0.0176554 |
| GO:BP | negative regulation of cell cycle                                                | GO:0045786 | 0.0178257 |
| GO:BP | canonical NF-kappaB signal transduction                                          | GO:0007249 | 0.0181072 |
| GO:BP | DNA damage checkpoint signaling                                                  | GO:0000077 | 0.0181881 |
| GO:BP | aromatic compound catabolic process                                              | GO:0019439 | 0.0182619 |
| GO:BP | chemical homeostasis                                                             | GO:0048878 | 0.0182702 |
| GO:BP | cytokine-mediated signaling pathway                                              | GO:0019221 | 0.018625  |
| GO:BP | response to salt                                                                 | GO:1902074 | 0.0188038 |
| GO:BP | hexose metabolic process                                                         | GO:0019318 | 0.0190478 |
| GO:BP | positive regulation of cell differentiation                                      | GO:0045597 | 0.0196321 |
| GO:BP | response to hypoxia                                                              | GO:0001666 | 0.019634  |
| GO:BP | regulation of protein ubiquitination                                             | GO:0031396 | 0.0196755 |
| GO:BP | regulation of cell morphogenesis                                                 | GO:0022604 | 0.0196755 |
| GO:BP | cell surface pattern recognition receptor signaling pathway                      | GO:0002752 | 0.0204019 |
| GO:BP | cell surface toll-like receptor signaling pathway                                | GO:0140895 | 0.0204019 |
| GO:BP | rRNA metabolic process                                                           | GO:0016072 | 0.0206008 |
| GO:BP | sterol homeostasis                                                               | GO:0055092 | 0.020746  |
| GO:BP | in utero embryonic development                                                   | GO:0001701 | 0.020746  |
| GO:BP | cholesterol homeostasis                                                          | GO:0042632 | 0.020746  |
| GO:BP | regulation of leukocyte differentiation                                          | GO:1902105 | 0.0207706 |
| GO:BP | cellular response to radiation                                                   | GO:0071478 | 0.0207706 |
| GO:BP | response to nitrogen compound                                                    | GO:1901698 | 0.0207706 |
| GO:BP | positive regulation of protein-containing complex assembly                       | GO:0031334 | 0.0207706 |
| GO:BP | organic hydroxy compound metabolic process                                       | GO:1901615 | 0.0207706 |
| GO:BP | regulation of vesicle-mediated transport                                         | GO:0060627 | 0.0214585 |
| GO:BP | response to ionizing radiation                                                   | GO:0010212 | 0.0214585 |
| GO:BP | regulation of viral process                                                      | GO:0050792 | 0.0214585 |
| GO:BP | protein-containing complex assembly                                              | GO:0065003 | 0.0219012 |
| GO:BP | hemostasis                                                                       | GO:0007599 | 0.0219517 |
| GO:BP | positive regulation of DNA-templated transcription                               | GO:0045893 | 0.0219783 |
| GO:BP | cellular nitrogen compound catabolic process                                     | GO:0044270 | 0.0219945 |
| GO:BP | positive regulation of RNA biosynthetic process                                  | GO:1902680 | 0.0220076 |
| GO:BP | response to inorganic substance                                                  | GO:0010035 | 0.0227859 |
| GO:BP | organic cyclic compound catabolic process                                        | GO:1901361 | 0.0229164 |
| GO:BP | tRNA modification                                                                | GO:0006400 | 0.0229491 |
| GO:BP | leukocyte cell-cell adhesion                                                     | GO:0007159 | 0.0232859 |
| GO:BP | mesenchymal cell differentiation                                                 | GO:0048762 | 0.0232859 |
| GO:BP | Golgi vesicle transport                                                          | GO:0048193 | 0.0233483 |
| GO:BP | innate immune response-activating signaling pathway                              | GO:0002758 | 0.0237622 |
| GO:BP | activation of cysteine-type endopeptidase activity involved in apoptotic process | GO:0006919 | 0.0239033 |
| GO:BP | regulation of Rho protein signal transduction                                    | GO:0035023 | 0.0239033 |
| GO:BP | response to type II interferon                                                   | GO:0034341 | 0.0241835 |

|       |                                                                  |            |           |
|-------|------------------------------------------------------------------|------------|-----------|
| GO:BP | blood vessel endothelial cell migration                          | GO:0043534 | 0.0245346 |
| GO:BP | positive regulation of phagocytosis                              | GO:0050766 | 0.0247357 |
| GO:BP | multicellular organismal movement                                | GO:0050879 | 0.0247357 |
| GO:BP | regulation of nucleobase-containing compound metabolic process   | GO:0019219 | 0.0249094 |
| GO:BP | positive regulation of small GTPase mediated signal transduction | GO:0051057 | 0.0250739 |
| GO:BP | maintenance of location in cell                                  | GO:0051651 | 0.0267406 |
| GO:BP | pattern recognition receptor signaling pathway                   | GO:0002221 | 0.0267406 |
| GO:BP | regulation of post-translational protein modification            | GO:1901873 | 0.0274809 |
| GO:BP | positive regulation of cell cycle                                | GO:0045787 | 0.0278928 |
| GO:BP | cytosolic transport                                              | GO:0016482 | 0.028     |
| GO:BP | sphingolipid biosynthetic process                                | GO:0030148 | 0.0282668 |
| GO:BP | regulation of macroautophagy                                     | GO:0016241 | 0.0282779 |
| GO:BP | regulation of lipid biosynthetic process                         | GO:0046890 | 0.0282779 |
| GO:BP | regulation of leukocyte migration                                | GO:0002685 | 0.0282779 |
| GO:BP | DNA integrity checkpoint signaling                               | GO:0031570 | 0.0285345 |
| GO:BP | organic acid biosynthetic process                                | GO:0016053 | 0.0287324 |
| GO:BP | regulation of T cell activation                                  | GO:0050863 | 0.0287557 |
| GO:BP | negative regulation of cell differentiation                      | GO:0045596 | 0.0289146 |
| GO:BP | glycerophospholipid biosynthetic process                         | GO:0046474 | 0.0289151 |
| GO:BP | organophosphate biosynthetic process                             | GO:0090407 | 0.0295922 |
| GO:BP | protein localization to cell periphery                           | GO:1990778 | 0.0297011 |
| GO:BP | regulation of myoblast differentiation                           | GO:0045661 | 0.0303423 |
| GO:BP | musculoskeletal movement                                         | GO:0050881 | 0.0304273 |
| GO:BP | water-soluble vitamin metabolic process                          | GO:0006767 | 0.0304273 |
| GO:BP | positive regulation of reactive oxygen species metabolic process | GO:2000379 | 0.0304273 |
| GO:BP | nucleobase-containing small molecule metabolic process           | GO:0055086 | 0.0306077 |
| GO:BP | system development                                               | GO:0048731 | 0.030875  |
| GO:BP | negative regulation of gene expression, epigenetic               | GO:0045814 | 0.030875  |
| GO:BP | regulation of viral life cycle                                   | GO:1903900 | 0.030875  |
| GO:BP | regulation of protein localization to cell periphery             | GO:1904375 | 0.030875  |
| GO:BP | alpha-beta T cell activation                                     | GO:0046631 | 0.030875  |
| GO:BP | lipid homeostasis                                                | GO:0055088 | 0.030875  |
| GO:BP | negative regulation of cytokine production                       | GO:0001818 | 0.030875  |
| GO:BP | cell activation involved in immune response                      | GO:0002263 | 0.030875  |
| GO:BP | negative regulation of translation                               | GO:0017148 | 0.0309518 |
| GO:BP | stress-activated protein kinase signaling cascade                | GO:0031098 | 0.0310866 |
| GO:BP | T cell proliferation                                             | GO:0042098 | 0.0315788 |
| GO:BP | negative regulation of inflammatory response                     | GO:0050728 | 0.0318931 |
| GO:BP | secondary alcohol metabolic process                              | GO:1902652 | 0.0319577 |
| GO:BP | negative regulation of protein kinase activity                   | GO:0006469 | 0.0319577 |
| GO:BP | negative regulation of post-translational protein modification   | GO:1901874 | 0.0319577 |
| GO:BP | regulation of actin filament bundle assembly                     | GO:0032231 | 0.0319577 |
| GO:BP | mitochondrial respiratory chain complex assembly                 | GO:0033108 | 0.0319577 |
| GO:BP | regulation of cell shape                                         | GO:0008360 | 0.0321971 |
| GO:BP | lymphocyte differentiation                                       | GO:0030098 | 0.0326479 |
| GO:BP | heterochromatin organization                                     | GO:0070828 | 0.0329025 |
| GO:BP | sphingolipid metabolic process                                   | GO:0006665 | 0.0331025 |
| GO:BP | DNA damage response, signal transduction by p53 class mediator   | GO:0030330 | 0.0331025 |
| GO:BP | protein N-linked glycosylation                                   | GO:0006487 | 0.0331025 |
| GO:BP | cellular response to nitrogen compound                           | GO:1901699 | 0.033165  |
| GO:BP | extrinsic apoptotic signaling pathway                            | GO:0097191 | 0.0333282 |
| GO:BP | tRNA metabolic process                                           | GO:0006399 | 0.0333282 |
| GO:BP | negative regulation of kinase activity                           | GO:0033673 | 0.0333282 |
| GO:BP | regulation of mitotic cell cycle                                 | GO:0007346 | 0.0333317 |
| GO:BP | chromosome segregation                                           | GO:0007059 | 0.033675  |
| GO:BP | heterocycle catabolic process                                    | GO:0046700 | 0.0338867 |

|       |                                                                                           |            |           |
|-------|-------------------------------------------------------------------------------------------|------------|-----------|
| GO:BP | regulation of protein modification by small protein conjugation or removal                | GO:1903320 | 0.0342947 |
| GO:BP | T cell differentiation                                                                    | GO:0030217 | 0.0342947 |
| GO:BP | protein targeting                                                                         | GO:0006605 | 0.0343047 |
| GO:BP | positive regulation of protein binding                                                    | GO:0032092 | 0.0354923 |
| GO:BP | receptor recycling                                                                        | GO:0001881 | 0.0354923 |
| GO:BP | intracellular protein transmembrane transport                                             | GO:0065002 | 0.0354923 |
| GO:BP | positive regulation of proteolysis involved in protein catabolic                          | GO:1903052 | 0.0360095 |
| GO:BP | xenobiotic metabolic process                                                              | GO:0006805 | 0.036389  |
| GO:BP | plasma membrane invagination                                                              | GO:0099024 | 0.036389  |
| GO:BP | toll-like receptor 4 signaling pathway                                                    | GO:0034142 | 0.036389  |
| GO:BP | positive regulation of protein dephosphorylation                                          | GO:0035307 | 0.036389  |
| GO:BP | regulation of lymphocyte mediated immunity                                                | GO:0002706 | 0.0364895 |
| GO:BP | positive regulation of ubiquitin-dependent protein catabolic process                      | GO:2000060 | 0.0364895 |
| GO:BP | positive regulation of cysteine-type endopeptidase activity involved in apoptotic process | GO:0043280 | 0.0365184 |
| GO:BP | nucleobase-containing compound catabolic process                                          | GO:0034655 | 0.0371623 |
| GO:BP | carbohydrate catabolic process                                                            | GO:0016052 | 0.0372169 |
| GO:BP | vesicle-mediated transport to the plasma membrane                                         | GO:0098876 | 0.0372169 |
| GO:BP | regulation of leukocyte cell-cell adhesion                                                | GO:1903037 | 0.0372719 |
| GO:BP | carboxylic acid biosynthetic process                                                      | GO:0046394 | 0.0372719 |
| GO:BP | leukocyte activation involved in immune response                                          | GO:0002366 | 0.0372719 |
| GO:BP | response to transforming growth factor beta                                               | GO:0071559 | 0.0375079 |
| GO:BP | response to heat                                                                          | GO:0009408 | 0.0379019 |
| GO:BP | positive regulation of binding                                                            | GO:0051099 | 0.0382011 |
| GO:BP | cell-cell adhesion                                                                        | GO:0098609 | 0.0384128 |
| GO:BP | regulation of phagocytosis                                                                | GO:0050764 | 0.0385468 |
| GO:BP | negative regulation of autophagy                                                          | GO:0010507 | 0.0385468 |
| GO:BP | cardiocyte differentiation                                                                | GO:0035051 | 0.0390325 |
| GO:BP | epigenetic regulation of gene expression                                                  | GO:0040029 | 0.0393272 |
| GO:BP | cellular ketone metabolic process                                                         | GO:0042180 | 0.0403469 |
| GO:BP | regulation of DNA-binding transcription factor activity                                   | GO:0051090 | 0.0405447 |
| GO:BP | mitotic nuclear division                                                                  | GO:0140014 | 0.0406588 |
| GO:BP | positive regulation of NF-kappaB transcription factor activity                            | GO:0051092 | 0.0406699 |
| GO:BP | T cell differentiation in thymus                                                          | GO:0033077 | 0.0407115 |
| GO:BP | stem cell differentiation                                                                 | GO:0048863 | 0.0412155 |
| GO:BP | epithelium development                                                                    | GO:0060429 | 0.0412155 |
| GO:BP | receptor-mediated endocytosis                                                             | GO:0006898 | 0.0412155 |
| GO:BP | steroid metabolic process                                                                 | GO:0008202 | 0.0412155 |
| GO:BP | membrane lipid metabolic process                                                          | GO:0006643 | 0.0414236 |
| GO:BP | regulation of actomyosin structure organization                                           | GO:0110020 | 0.0416795 |
| GO:BP | transport along microtubule                                                               | GO:0010970 | 0.0417543 |
| GO:BP | endothelial cell development                                                              | GO:0001885 | 0.0418599 |
| GO:BP | mitochondrial transmembrane transport                                                     | GO:1990542 | 0.0418599 |
| GO:BP | cellular response to organic cyclic compound                                              | GO:0071407 | 0.0426185 |
| GO:BP | regulation of stress-activated protein kinase signaling cascade                           | GO:0070302 | 0.0439196 |
| GO:BP | skeletal muscle fiber development                                                         | GO:0048741 | 0.0440378 |
| GO:BP | semaphorin-plexin signaling pathway                                                       | GO:0071526 | 0.0440378 |
| GO:BP | mitochondrial electron transport, NADH to ubiquinone                                      | GO:0006120 | 0.0440378 |
| GO:BP | lymphocyte migration                                                                      | GO:0072676 | 0.044052  |
| GO:BP | nuclear-transcribed mRNA catabolic process                                                | GO:0000956 | 0.044052  |
| GO:BP | mRNA catabolic process                                                                    | GO:0006402 | 0.0454611 |
| GO:BP | RNA catabolic process                                                                     | GO:0006401 | 0.0454611 |
| GO:BP | epithelial cell development                                                               | GO:0002064 | 0.0456334 |
| GO:BP | cellular response to nutrient levels                                                      | GO:0031669 | 0.0456334 |
| GO:BP | amino acid metabolic process                                                              | GO:0006520 | 0.0463839 |

|       |                                                               |            |           |
|-------|---------------------------------------------------------------|------------|-----------|
| GO:BP | developmental growth                                          | GO:0048589 | 0.047493  |
| GO:BP | positive regulation of proteasomal protein catabolic process  | GO:1901800 | 0.0475984 |
| GO:BP | regulation of nucleocytoplasmic transport                     | GO:0046822 | 0.0475984 |
| GO:BP | B cell activation                                             | GO:0042113 | 0.0498112 |
| GO:BP | double-strand break repair                                    | GO:0006302 | 0.0499808 |
| GO:CC | cytoplasm                                                     | GO:0005737 | 1.42E-142 |
| GO:CC | intracellular anatomical structure                            | GO:0005622 | 6.42E-67  |
| GO:CC | intracellular membrane-bounded organelle                      | GO:0043231 | 2.01E-65  |
| GO:CC | membrane-bounded organelle                                    | GO:0043227 | 1.42E-64  |
| GO:CC | cytosol                                                       | GO:0005829 | 2.17E-39  |
| GO:CC | intracellular organelle                                       | GO:0043229 | 5.79E-38  |
| GO:CC | organelle                                                     | GO:0043226 | 9.50E-35  |
| GO:CC | nucleoplasm                                                   | GO:0005654 | 9.02E-33  |
| GO:CC | cellular anatomical entity                                    | GO:0110165 | 1.02E-31  |
| GO:CC | endomembrane system                                           | GO:0012505 | 2.28E-31  |
| GO:CC | membrane-enclosed lumen                                       | GO:0031974 | 3.21E-26  |
| GO:CC | organelle lumen                                               | GO:0043233 | 3.21E-26  |
| GO:CC | intracellular organelle lumen                                 | GO:0070013 | 3.21E-26  |
| GO:CC | catalytic complex                                             | GO:1902494 | 3.97E-25  |
| GO:CC | organelle membrane                                            | GO:0031090 | 1.33E-22  |
| GO:CC | nuclear lumen                                                 | GO:0031981 | 2.68E-21  |
| GO:CC | mitochondrion                                                 | GO:0005739 | 3.84E-19  |
| GO:CC | Golgi apparatus                                               | GO:0005794 | 3.78E-18  |
| GO:CC | endoplasmic reticulum                                         | GO:0005783 | 3.41E-14  |
| GO:CC | intracellular protein-containing complex                      | GO:0140535 | 4.13E-13  |
| GO:CC | protein-containing complex                                    | GO:0032991 | 5.78E-13  |
| GO:CC | organelle envelope                                            | GO:0031967 | 7.43E-13  |
| GO:CC | envelope                                                      | GO:0031975 | 7.43E-13  |
| GO:CC | nucleus                                                       | GO:0005634 | 1.28E-12  |
| GO:CC | mitochondrial envelope                                        | GO:0005740 | 2.70E-11  |
| GO:CC | mitochondrial membrane                                        | GO:0031966 | 2.51E-10  |
| GO:CC | organelle subcompartment                                      | GO:0031984 | 2.63E-10  |
| GO:CC | actin cytoskeleton                                            | GO:0015629 | 1.42E-09  |
| GO:CC | mitochondrial protein-containing complex                      | GO:0098798 | 6.36E-09  |
| GO:CC | transferase complex                                           | GO:1990234 | 3.29E-08  |
| GO:CC | mitochondrial inner membrane                                  | GO:0005743 | 4.45E-08  |
| GO:CC | bounding membrane of organelle                                | GO:0098588 | 6.46E-08  |
| GO:CC | endoplasmic reticulum subcompartment                          | GO:0098827 | 8.08E-08  |
| GO:CC | nuclear outer membrane-endoplasmic reticulum membrane network | GO:0042175 | 8.17E-08  |
| GO:CC | endoplasmic reticulum membrane                                | GO:0005789 | 8.17E-08  |
| GO:CC | vesicle                                                       | GO:0031982 | 4.41E-07  |
| GO:CC | organelle inner membrane                                      | GO:0019866 | 9.55E-07  |
| GO:CC | nuclear body                                                  | GO:0016604 | 1.49E-06  |
| GO:CC | endosome                                                      | GO:0005768 | 2.12E-06  |
| GO:CC | Golgi membrane                                                | GO:0000139 | 2.14E-06  |
| GO:CC | cytoplasmic vesicle                                           | GO:0031410 | 2.14E-06  |
| GO:CC | plasma membrane                                               | GO:0005886 | 2.14E-06  |
| GO:CC | cell periphery                                                | GO:0071944 | 2.48E-06  |
| GO:CC | intracellular vesicle                                         | GO:0097708 | 3.45E-06  |
| GO:CC | inner mitochondrial membrane protein complex                  | GO:0098800 | 5.87E-06  |
| GO:CC | sarcomere                                                     | GO:0030017 | 1.00E-05  |
| GO:CC | ribosomal subunit                                             | GO:0044391 | 1.37E-05  |
| GO:CC | chromosome                                                    | GO:0005694 | 1.69E-05  |
| GO:CC | perinuclear region of cytoplasm                               | GO:0048471 | 2.29E-05  |
| GO:CC | nuclear speck                                                 | GO:0016607 | 2.64E-05  |
| GO:CC | contractile fiber                                             | GO:0043292 | 5.83E-05  |



|       |                                       |            |           |
|-------|---------------------------------------|------------|-----------|
| GO:CC | membrane protein complex              | GO:0098796 | 5.83E-05  |
| GO:CC | ubiquitin ligase complex              | GO:0000151 | 7.44E-05  |
| GO:CC | cell surface                          | GO:0009986 | 8.42E-05  |
| GO:CC | myofibril                             | GO:0030016 | 0.0001166 |
| GO:CC | spliceosomal complex                  | GO:0005681 | 0.0001295 |
| GO:CC | vacuole                               | GO:0005773 | 0.0001419 |
| GO:CC | side of membrane                      | GO:0098552 | 0.0002207 |
| GO:CC | lysosome                              | GO:0005764 | 0.0003539 |
| GO:CC | microtubule cytoskeleton              | GO:0015630 | 0.0003539 |
| GO:CC | lytic vacuole                         | GO:0000323 | 0.0003539 |
| GO:CC | mitochondrial matrix                  | GO:0005759 | 0.0004625 |
| GO:CC | chromatin                             | GO:0000785 | 0.0005243 |
| GO:CC | I band                                | GO:0031674 | 0.0005596 |
| GO:CC | endopeptidase complex                 | GO:1905369 | 0.0005621 |
| GO:CC | cytosolic ribosome                    | GO:0022626 | 0.0006768 |
| GO:CC | protein-DNA complex                   | GO:0032993 | 0.0006773 |
| GO:CC | small ribosomal subunit               | GO:0015935 | 0.0007625 |
| GO:CC | peptidase complex                     | GO:1905368 | 0.0010415 |
| GO:CC | nuclear membrane                      | GO:0031965 | 0.0010415 |
| GO:CC | cytoplasmic ribonucleoprotein granule | GO:0036464 | 0.0010449 |
| GO:CC | ribonucleoprotein granule             | GO:0035770 | 0.001124  |
| GO:CC | microtubule organizing center         | GO:0005815 | 0.001174  |
| GO:CC | focal adhesion                        | GO:0005925 | 0.0013426 |
| GO:CC | cell-substrate junction               | GO:0030055 | 0.0013696 |
| GO:CC | centrosome                            | GO:0005813 | 0.0013738 |
| GO:CC | Z disc                                | GO:0030018 | 0.00252   |
| GO:CC | endosome membrane                     | GO:0010008 | 0.0025539 |
| GO:CC | nuclear envelope                      | GO:0005635 | 0.0030185 |
| GO:CC | membrane raft                         | GO:0045121 | 0.0032503 |
| GO:CC | membrane microdomain                  | GO:0098857 | 0.0032503 |
| GO:CC | U2-type spliceosomal complex          | GO:0005684 | 0.0039857 |
| GO:CC | respiratory chain complex             | GO:0098803 | 0.0039857 |
| GO:CC | early endosome                        | GO:0005769 | 0.0040337 |
| GO:CC | proteasome complex                    | GO:0000502 | 0.0040337 |
| GO:CC | oxidoreductase complex                | GO:1990204 | 0.0040934 |
| GO:CC | peroxisome                            | GO:0005777 | 0.0056656 |
| GO:CC | microbody                             | GO:0042579 | 0.0056656 |
| GO:CC | external side of plasma membrane      | GO:0009897 | 0.006335  |
| GO:CC | respirasome                           | GO:0070469 | 0.0078965 |
| GO:CC | Golgi apparatus subcompartment        | GO:0098791 | 0.0086171 |
| GO:CC | lamellipodium                         | GO:0030027 | 0.0105525 |
| GO:CC | large ribosomal subunit               | GO:0015934 | 0.0126157 |
| GO:CC | cortical actin cytoskeleton           | GO:0030864 | 0.0133284 |
| GO:CC | organellar ribosome                   | GO:0000313 | 0.0133284 |
| GO:CC | mitochondrial ribosome                | GO:0005761 | 0.0133284 |
| GO:CC | spindle                               | GO:0005819 | 0.0133284 |
| GO:CC | ATPase complex                        | GO:1904949 | 0.0148187 |
| GO:CC | catalytic step 2 spliceosome          | GO:0071013 | 0.0148187 |
| GO:CC | mitochondrial respirasome             | GO:0005746 | 0.0148187 |
| GO:CC | cell leading edge                     | GO:0031252 | 0.015122  |
| GO:CC | myosin complex                        | GO:0016459 | 0.0223729 |
| GO:CC | cytoplasmic vesicle membrane          | GO:0030659 | 0.0233471 |
| GO:CC | cullin-RING ubiquitin ligase complex  | GO:0031461 | 0.0233603 |
| GO:CC | Cul4-RING E3 ubiquitin ligase complex | GO:0080008 | 0.0234965 |
| GO:CC | mitotic spindle                       | GO:0072686 | 0.0240015 |
| GO:CC | sarcolemma                            | GO:0042383 | 0.0240015 |

|       |                                                      |            |           |
|-------|------------------------------------------------------|------------|-----------|
| GO:CC | respiratory chain complex I                          | GO:0045271 | 0.0276796 |
| GO:CC | NADH dehydrogenase complex                           | GO:0030964 | 0.0276796 |
| GO:CC | mitochondrial respiratory chain complex I            | GO:0005747 | 0.0276796 |
| GO:CC | vesicle membrane                                     | GO:0012506 | 0.0334816 |
| GO:CC | mitochondrial outer membrane                         | GO:0005741 | 0.0337262 |
| GO:CC | anchoring junction                                   | GO:0070161 | 0.0339589 |
| GO:CC | endoplasmic reticulum-Golgi intermediate compartment | GO:0005793 | 0.0348282 |
| GO:CC | cytosolic small ribosomal subunit                    | GO:0022627 | 0.0348282 |
| GO:CC | recycling endosome                                   | GO:0055037 | 0.0348282 |
| GO:CC | chromosomal region                                   | GO:0098687 | 0.0420025 |
| GO:CC | SWI/SNF superfamily-type complex                     | GO:0070603 | 0.0445528 |
| GO:CC | outer membrane                                       | GO:0019867 | 0.0466654 |
| GO:CC | organelle outer membrane                             | GO:0031968 | 0.0466654 |
| GO:CC | heterochromatin                                      | GO:0000792 | 0.0480823 |
