# Supplementary material for: Weighted gene co-expression network analysis identifies important modules and hub genes involved in the regulation of breast muscle yield in broilers
Source: PubMed Central journal article supplement (PMC11366510; doi:10.5713/ab.23.0548), 2024-04-25
Supplement: ab-23-0548-Supplementary-Table-6.pdf [file ab-23-0548-Supplementary-Table-6.pdf]

**Table S6. Functional enrichment analysis of the genes in the skyblue3 module.**

| <b>Category</b> | <b>Term description</b> | <b>Term ID</b> | <b>Adjusted p value</b> | <b>Genes</b>                                             |
|-----------------|-------------------------|----------------|-------------------------|----------------------------------------------------------|
| GO:BP           | motile cilium assembly  | GO:0044458     | 0.015767706             | ENSGALG00010004386,ENSGALG00010007861,ENSGALG00010007862 |
