# Supplementary material for: Weighted gene co-expression network analysis identifies important modules and hub genes involved in the regulation of breast muscle yield in broilers
Source: PubMed Central journal article supplement (PMC11366510; doi:10.5713/ab.23.0548), 2024-04-25
Supplement: ab-23-0548-Supplementary-Table-7.pdf [file ab-23-0548-Supplementary-Table-7.pdf]

**Table S7.The |KME| value of each gene in the turquoise and skyblue3 modules.**

| <b>Gene ID</b>     | <b>kME MM.turquoise</b> | <b>kME MM.skyblue3</b> |
|--------------------|-------------------------|------------------------|
| ENSGALG00010000003 | 0.67713786              | 0.268869005            |
| ENSGALG00010000005 | 0.182435892             | 0.111675254            |
| ENSGALG00010000007 | 0.701844933             | 0.157349005            |
| ENSGALG00010000008 | 0.684526008             | 0.242677865            |
| ENSGALG00010000009 | 0.803826811             | 0.238213257            |
| ENSGALG00010000011 | 0.648049638             | 0.125438727            |
| ENSGALG00010000012 | 0.172212679             | 0.138142629            |
| ENSGALG00010000013 | 0.121598278             | 0.093596252            |
| ENSGALG00010000014 | 0.240397531             | 0.022084896            |
| ENSGALG00010000015 | 0.066079265             | 0.176921541            |
| ENSGALG00010000016 | 0.745184821             | 0.194745892            |
| ENSGALG00010000017 | 0.643016394             | 0.079652908            |
| ENSGALG00010000018 | 0.682282424             | 0.12175719             |
| ENSGALG00010000019 | 0.224779305             | 0.192921885            |
| ENSGALG00010000020 | 0.692641058             | 0.120689171            |
| ENSGALG00010000022 | 0.57900545              | 0.110834363            |
| ENSGALG00010000023 | 0.842137933             | 0.178854668            |
| ENSGALG00010000024 | 0.83613675              | 0.206106559            |
| ENSGALG00010000026 | 0.834068365             | 0.209176272            |
| ENSGALG00010000028 | 0.757054671             | 0.140089859            |
| ENSGALG00010000029 | 0.775204873             | 0.136692049            |
| ENSGALG00010000033 | 0.804706882             | 0.178964005            |
| ENSGALG00010000034 | 0.806636092             | 0.202310047            |
| ENSGALG00010000035 | 0.675810485             | 0.003512569            |
| ENSGALG00010000036 | 0.864362727             | 0.210032607            |
| ENSGALG00010000037 | 0.646262723             | 0.254353035            |
| ENSGALG00010000038 | 0.800739856             | 0.273352761            |
| ENSGALG00010000039 | 0.946311036             | 0.292453163            |
| ENSGALG00010000042 | 0.782584922             | 0.248525703            |
| ENSGALG00010000043 | 0.538937469             | 0.101483349            |
| ENSGALG00010000044 | 0.983924335             | 0.315610705            |
| ENSGALG00010000045 | 0.73303003              | 0.093595803            |
| ENSGALG00010000046 | 0.097915723             | 0.015123708            |
| ENSGALG00010000047 | 0.901331555             | 0.20643188             |
| ENSGALG00010000048 | 0.993780774             | 0.351032165            |
| ENSGALG00010000049 | 0.961209591             | 0.391094849            |
| ENSGALG00010000050 | 0.478907053             | 0.08575067             |
| ENSGALG00010000051 | 0.341385833             | 0.036099822            |
| ENSGALG00010000052 | 0.79627951              | 0.393446169            |
| ENSGALG00010000053 | 0.494773155             | 0.269681888            |
| ENSGALG00010000054 | 0.934613678             | 0.347151254            |
| ENSGALG00010000055 | 0.348137151             | 0.079483386            |
| ENSGALG00010000056 | 0.862541337             | 0.15130898             |
| ENSGALG00010000058 | 0.393916642             | 0.109133222            |
| ENSGALG00010000059 | 0.892840085             | 0.21548811             |
| ENSGALG00010000060 | 0.939446462             | 0.303469055            |
| ENSGALG00010000061 | 0.938597236             | 0.432841745            |
| ENSGALG00010000062 | 0.182883847             | 0.160858452            |
| ENSGALG00010000063 | 0.900819619             | 0.310191486            |
| ENSGALG00010000065 | 0.506539912             | 0.043309882            |
| ENSGALG00010000066 | 0.586929648             | 0.232480561            |
| ENSGALG00010000068 | 0.371201294             | 0.154460096            |
| ENSGALG00010000069 | 0.985074172             | 0.314422848            |
| ENSGALG00010000070 | 0.460865763             | 0.02165537             |

|                    |             |             |
|--------------------|-------------|-------------|
| ENSGALG00010000071 | 0.318121149 | 0.063067284 |
| ENSGALG00010000072 | 0.840375586 | 0.098305482 |
| ENSGALG00010000073 | 0.082576983 | 0.333392741 |
| ENSGALG00010000074 | 0.482188149 | 0.036709511 |
| ENSGALG00010000075 | 0.304017794 | 0.009211689 |
| ENSGALG00010000076 | 0.680266948 | 0.217810446 |
| ENSGALG00010000078 | 0.62186167  | 0.337567599 |
| ENSGALG00010000081 | 0.99737335  | 0.312977789 |
| ENSGALG00010000082 | 0.867423816 | 0.424618736 |
| ENSGALG00010000084 | 0.299215241 | 0.118879997 |
| ENSGALG00010000085 | 0.585306333 | 0.033479025 |
| ENSGALG00010000086 | 0.059605451 | 0.275867318 |
| ENSGALG00010000087 | 0.327901033 | 0.065172461 |
| ENSGALG00010000088 | 0.805560626 | 0.209291854 |
| ENSGALG00010000089 | 0.813731633 | 0.573335529 |
| ENSGALG00010000090 | 0.088282936 | 0.168883153 |
| ENSGALG00010000091 | 0.338822945 | 0.131496438 |
| ENSGALG00010000092 | 0.969156581 | 0.303084956 |
| ENSGALG00010000093 | 0.671240355 | 0.212128494 |
| ENSGALG00010000094 | 0.201400243 | 0.317586472 |
| ENSGALG00010000095 | 0.244019886 | 0.18555773  |
| ENSGALG00010000096 | 0.218808132 | 0.266049458 |
| ENSGALG00010000098 | 0.062106651 | 0.249684857 |
| ENSGALG00010000099 | 0.022812732 | 0.098563748 |
| ENSGALG00010000100 | 0.279607186 | 0.137322857 |
| ENSGALG00010000101 | 0.280441633 | 0.389997873 |
| ENSGALG00010000102 | 0.046953014 | 0.356333913 |
| ENSGALG00010000103 | 0.621730248 | 0.342123731 |
| ENSGALG00010000104 | 0.066574794 | 0.150135049 |
| ENSGALG00010000105 | 0.792226181 | 0.027901748 |
| ENSGALG00010000106 | 0.39454732  | 0.069859099 |
| ENSGALG00010000107 | 0.098724135 | 0.186773211 |
| ENSGALG00010000108 | 0.383538676 | 0.331753084 |
| ENSGALG00010000109 | 0.175825467 | 0.099421526 |
| ENSGALG00010000110 | 0.379524334 | 0.186886972 |
| ENSGALG00010000111 | 0.397706705 | 0.359896341 |
| ENSGALG00010000112 | 0.264486095 | 0.170965971 |
| ENSGALG00010000113 | 0.19148267  | 0.031974627 |
| ENSGALG00010000114 | 0.283168602 | 0.205384802 |
| ENSGALG00010000116 | 0.534486748 | 0.534472143 |
| ENSGALG00010000117 | 0.090280663 | 0.190361202 |
| ENSGALG00010000119 | 0.1981871   | 0.0876879   |
| ENSGALG00010000120 | 0.086362913 | 0.230559941 |
| ENSGALG00010000121 | 0.554522606 | 0.222465351 |
| ENSGALG00010000122 | 0.201958335 | 0.258758598 |
| ENSGALG00010000123 | 0.470005901 | 0.319750703 |
| ENSGALG00010000124 | 0.302843886 | 0.39866435  |
| ENSGALG00010000125 | 0.588613125 | 0.393640326 |
| ENSGALG00010000126 | 0.950876764 | 0.314298462 |
| ENSGALG00010000127 | 0.935269127 | 0.407157222 |
| ENSGALG00010000129 | 0.61017249  | 0.176261391 |
| ENSGALG00010000130 | 0.044822307 | 0.068184874 |
| ENSGALG00010000132 | 0.385848762 | 0.189101471 |
| ENSGALG00010000133 | 0.947554712 | 0.350858375 |
| ENSGALG00010000134 | 0.968246621 | 0.282973321 |
| ENSGALG00010000135 | 0.959211403 | 0.315325082 |

|                    |             |             |
|--------------------|-------------|-------------|
| ENSGALG00010000137 | 0.842033829 | 0.561701762 |
| ENSGALG00010000138 | 0.779177303 | 0.183853187 |
| ENSGALG00010000139 | 0.020868334 | 0.340711942 |
| ENSGALG00010000140 | 0.730189687 | 0.179209526 |
| ENSGALG00010000141 | 0.890773417 | 0.332502139 |
| ENSGALG00010000142 | 0.549070007 | 0.106267265 |
| ENSGALG00010000143 | 0.876868821 | 0.381793433 |
| ENSGALG00010000145 | 0.841891243 | 0.284419506 |
| ENSGALG00010000146 | 0.073990821 | 0.033900297 |
| ENSGALG00010000147 | 0.621842521 | 0.246890789 |
| ENSGALG00010000148 | 0.749289356 | 0.464781896 |
| ENSGALG00010000149 | 0.89723681  | 0.253136365 |
| ENSGALG00010000150 | 0.981303167 | 0.317835606 |
| ENSGALG00010000151 | 0.952695574 | 0.31473792  |
| ENSGALG00010000152 | 0.724232064 | 0.148590177 |
| ENSGALG00010000153 | 0.998344957 | 0.33341863  |
| ENSGALG00010000155 | 0.916616961 | 0.433283083 |
| ENSGALG00010000156 | 0.219928655 | 0.14384675  |
| ENSGALG00010000160 | 0.394327047 | 0.133628127 |
| ENSGALG00010000161 | 0.267602661 | 0.383260926 |
| ENSGALG00010000163 | 0.409436406 | 0.157934013 |
| ENSGALG00010000165 | 0.177578803 | 0.344296519 |
| ENSGALG00010000166 | 0.947942718 | 0.320109688 |
| ENSGALG00010000168 | 0.016918137 | 0.111182187 |
| ENSGALG00010000169 | 0.72526171  | 0.268993078 |
| ENSGALG00010000170 | 0.633549698 | 0.078623057 |
| ENSGALG00010000171 | 0.944412875 | 0.218348315 |
| ENSGALG00010000173 | 0.98710556  | 0.291826512 |
| ENSGALG00010000174 | 0.823200439 | 0.163955708 |
| ENSGALG00010000175 | 0.282754916 | 0.323313762 |
| ENSGALG00010000176 | 0.345519434 | 0.151812649 |
| ENSGALG00010000177 | 0.894020103 | 0.219313866 |
| ENSGALG00010000178 | 0.38813597  | 0.156768404 |
| ENSGALG00010000179 | 0.900929472 | 0.248380947 |
| ENSGALG00010000180 | 0.193820404 | 0.329577812 |
| ENSGALG00010000181 | 0.120830886 | 0.22671206  |
| ENSGALG00010000183 | 0.562325151 | 0.27845489  |
| ENSGALG00010000185 | 0.265558089 | 0.028821141 |
| ENSGALG00010000186 | 0.975063698 | 0.342381411 |
| ENSGALG00010000187 | 0.181784172 | 0.269566066 |
| ENSGALG00010000189 | 0.500124249 | 0.384696218 |
| ENSGALG00010000191 | 0.654347541 | 0.346957861 |
| ENSGALG00010000192 | 0.032664121 | 0.12367773  |
| ENSGALG00010000193 | 0.332381325 | 0.155868563 |
| ENSGALG00010000194 | 0.847600602 | 0.3646619   |
| ENSGALG00010000195 | 0.85905845  | 0.343014695 |
| ENSGALG00010000197 | 0.025104256 | 0.066609323 |
| ENSGALG00010000198 | 0.271315151 | 0.244987657 |
| ENSGALG00010000199 | 0.426881079 | 0.044800078 |
| ENSGALG00010000200 | 0.178760711 | 0.066310067 |
| ENSGALG00010000201 | 0.277566769 | 0.107857127 |
| ENSGALG00010000202 | 0.975167672 | 0.237285493 |
| ENSGALG00010000205 | 0.541129824 | 0.152683563 |
| ENSGALG00010000206 | 0.159298216 | 0.098116394 |
| ENSGALG00010000210 | 0.740110011 | 0.066156881 |
| ENSGALG00010000215 | 0.533229281 | 0.314863703 |

|                    |             |             |
|--------------------|-------------|-------------|
| ENSGALG00010000216 | 0.008963608 | 0.336983718 |
| ENSGALG00010000217 | 0.216693802 | 0.023288188 |
| ENSGALG00010000218 | 0.292519347 | 0.251059971 |
| ENSGALG00010000219 | 0.357310469 | 0.002025275 |
| ENSGALG00010000220 | 0.311429086 | 0.017150986 |
| ENSGALG00010000221 | 0.902789763 | 0.335253742 |
| ENSGALG00010000222 | 0.474234478 | 0.079151133 |
| ENSGALG00010000223 | 0.625245231 | 0.202124994 |
| ENSGALG00010000224 | 0.986808581 | 0.320707628 |
| ENSGALG00010000225 | 0.208208723 | 0.078478438 |
| ENSGALG00010000226 | 0.890126749 | 0.35918507  |
| ENSGALG00010000227 | 0.872729957 | 0.321594645 |
| ENSGALG00010000228 | 0.007149054 | 0.442043105 |
| ENSGALG00010000229 | 0.738339183 | 0.287860154 |
| ENSGALG00010000230 | 0.130352148 | 0.101811912 |
| ENSGALG00010000231 | 0.906263036 | 0.326996238 |
| ENSGALG00010000232 | 0.946182075 | 0.266611573 |
| ENSGALG00010000233 | 0.957159178 | 0.34873544  |
| ENSGALG00010000235 | 0.866956868 | 0.177786896 |
| ENSGALG00010000236 | 0.800700993 | 0.321681539 |
| ENSGALG00010000238 | 0.103188554 | 0.180603966 |
| ENSGALG00010000241 | 0.154561313 | 0.365560538 |
| ENSGALG00010000242 | 0.951333566 | 0.308757107 |
| ENSGALG00010000244 | 0.586125024 | 0.199277277 |
| ENSGALG00010000247 | 0.947766353 | 0.35586602  |
| ENSGALG00010000248 | 0.383549736 | 0.180028334 |
| ENSGALG00010000254 | 0.479323659 | 0.118157845 |
| ENSGALG00010000255 | 0.988523079 | 0.323807244 |
| ENSGALG00010000256 | 0.496903148 | 0.147876642 |
| ENSGALG00010000258 | 0.285272007 | 0.109169955 |
| ENSGALG00010000261 | 0.621305532 | 0.078798209 |
| ENSGALG00010000263 | 0.869613551 | 0.127901101 |
| ENSGALG00010000266 | 0.048522101 | 0.113076891 |
| ENSGALG00010000267 | 0.947895777 | 0.268612047 |
| ENSGALG00010000269 | 0.436114363 | 0.157360596 |
| ENSGALG00010000271 | 0.607836476 | 0.446182268 |
| ENSGALG00010000272 | 0.644490714 | 0.514098843 |
| ENSGALG00010000273 | 0.302436477 | 0.152549183 |
| ENSGALG00010000277 | 0.555340376 | 0.12165401  |
| ENSGALG00010000279 | 0.642919184 | 0.306092605 |
| ENSGALG00010000280 | 0.795596161 | 0.067331988 |
| ENSGALG00010000281 | 0.93547088  | 0.351570104 |
| ENSGALG00010000283 | 0.589405713 | 0.26145117  |
| ENSGALG00010000284 | 0.750980331 | 0.317828426 |
| ENSGALG00010000285 | 0.984818432 | 0.328978033 |
| ENSGALG00010000286 | 0.917316202 | 0.257099718 |
| ENSGALG00010000287 | 0.145814573 | 0.11618022  |
| ENSGALG00010000288 | 0.556835512 | 0.005107816 |
| ENSGALG00010000289 | 0.921269203 | 0.297905093 |
| ENSGALG00010000291 | 0.795524011 | 0.290629895 |
| ENSGALG00010000292 | 0.095740687 | 0.357179994 |
| ENSGALG00010000293 | 0.744980138 | 0.166477753 |
| ENSGALG00010000294 | 0.701978184 | 0.014254704 |
| ENSGALG00010000295 | 0.913605083 | 0.340117613 |
| ENSGALG00010000297 | 0.694260876 | 0.338915472 |
| ENSGALG00010000298 | 0.906331397 | 0.38917595  |

|                    |             |             |
|--------------------|-------------|-------------|
| ENSGALG00010000300 | 0.64029768  | 0.244040708 |
| ENSGALG00010000301 | 0.978568254 | 0.350169096 |
| ENSGALG00010000302 | 0.628657002 | 0.314299243 |
| ENSGALG00010000303 | 0.763141582 | 0.154461705 |
| ENSGALG00010000304 | 0.297090418 | 0.136289521 |
| ENSGALG00010000305 | 0.520987419 | 0.162604164 |
| ENSGALG00010000306 | 0.738765512 | 0.202968517 |
| ENSGALG00010000307 | 0.917166395 | 0.314454344 |
| ENSGALG00010000308 | 0.631444371 | 0.068901316 |
| ENSGALG00010000310 | 0.636982726 | 0.319093774 |
| ENSGALG00010000312 | 0.0178609   | 0.012529185 |
| ENSGALG00010000314 | 0.531008016 | 0.230390244 |
| ENSGALG00010000315 | 0.260516212 | 0.164924477 |
| ENSGALG00010000316 | 0.51727901  | 0.272491674 |
| ENSGALG00010000317 | 0.49081902  | 0.149174245 |
| ENSGALG00010000320 | 0.406311723 | 0.009117756 |
| ENSGALG00010000321 | 0.239043905 | 0.151562739 |
| ENSGALG00010000323 | 0.848915605 | 0.223748466 |
| ENSGALG00010000324 | 0.286582928 | 0.136904406 |
| ENSGALG00010000325 | 0.104724503 | 0.169287249 |
| ENSGALG00010000327 | 0.245700908 | 0.010899108 |
| ENSGALG00010000328 | 0.149638706 | 0.188230914 |
| ENSGALG00010000331 | 0.830320193 | 0.308847496 |
| ENSGALG00010000333 | 0.267089704 | 0.089862198 |
| ENSGALG00010000334 | 0.409436406 | 0.157934013 |
| ENSGALG00010000335 | 0.30082842  | 0.188633163 |
| ENSGALG00010000337 | 0.132246131 | 0.188493184 |
| ENSGALG00010000338 | 0.679494568 | 0.206807442 |
| ENSGALG00010000340 | 0.93490093  | 0.357239034 |
| ENSGALG00010000341 | 0.331326123 | 0.219257781 |
| ENSGALG00010000342 | 0.245700908 | 0.010899108 |
| ENSGALG00010000344 | 0.074387989 | 0.096852877 |
| ENSGALG00010000346 | 0.902883484 | 0.342295803 |
| ENSGALG00010000347 | 0.383605605 | 0.025332023 |
| ENSGALG00010000349 | 0.88785872  | 0.281688769 |
| ENSGALG00010000350 | 0.909077042 | 0.275152935 |
| ENSGALG00010000351 | 0.721190767 | 0.277840767 |
| ENSGALG00010000353 | 0.973269824 | 0.28516072  |
| ENSGALG00010000356 | 0.969525401 | 0.342239339 |
| ENSGALG00010000357 | 0.458831118 | 0.263412792 |
| ENSGALG00010000359 | 0.138718324 | 0.153188062 |
| ENSGALG00010000360 | 0.210180491 | 0.104336086 |
| ENSGALG00010000361 | 0.36853544  | 0.277846699 |
| ENSGALG00010000362 | 0.893683345 | 0.142865183 |
| ENSGALG00010000363 | 0.590613907 | 0.163920133 |
| ENSGALG00010000364 | 0.217147198 | 0.137739361 |
| ENSGALG00010000365 | 0.491926949 | 0.015334533 |
| ENSGALG00010000366 | 0.802488844 | 0.21909053  |
| ENSGALG00010000367 | 0.211037562 | 0.03617017  |
| ENSGALG00010000368 | 0.503243231 | 0.114904165 |
| ENSGALG00010000370 | 0.264239718 | 0.073427965 |
| ENSGALG00010000371 | 0.700413249 | 0.371073562 |
| ENSGALG00010000372 | 0.750875156 | 0.17447336  |
| ENSGALG00010000373 | 0.194179602 | 0.152508466 |
| ENSGALG00010000374 | 0.145483169 | 0.072714909 |
| ENSGALG00010000375 | 0.196287929 | 0.062576308 |

|                    |             |             |
|--------------------|-------------|-------------|
| ENSGALG00010000376 | 0.819868533 | 0.451972218 |
| ENSGALG00010000377 | 0.69685578  | 0.126793557 |
| ENSGALG00010000378 | 0.435073584 | 0.297152464 |
| ENSGALG00010000381 | 0.283316707 | 0.15918372  |
| ENSGALG00010000382 | 0.02585932  | 0.368605526 |
| ENSGALG00010000383 | 0.394927857 | 0.119113854 |
| ENSGALG00010000384 | 0.003386147 | 0.100344536 |
| ENSGALG00010000386 | 0.37760366  | 0.406892287 |
| ENSGALG00010000387 | 0.336071976 | 0.150227555 |
| ENSGALG00010000388 | 0.936179    | 0.231019826 |
| ENSGALG00010000389 | 0.327120709 | 0.228008616 |
| ENSGALG00010000390 | 0.124380843 | 0.190094924 |
| ENSGALG00010000391 | 0.221145033 | 0.188575242 |
| ENSGALG00010000392 | 0.105124449 | 0.249309416 |
| ENSGALG00010000393 | 0.181816966 | 0.434706795 |
| ENSGALG00010000395 | 0.926451303 | 0.238654121 |
| ENSGALG00010000396 | 0.129117615 | 0.180464336 |
| ENSGALG00010000397 | 0.120945868 | 0.062169713 |
| ENSGALG00010000398 | 0.170088117 | 0.205267558 |
| ENSGALG00010000399 | 0.310605471 | 0.070195065 |
| ENSGALG00010000400 | 0.934884133 | 0.233501688 |
| ENSGALG00010000401 | 0.166483129 | 0.280094128 |
| ENSGALG00010000402 | 0.579422546 | 0.139894527 |
| ENSGALG00010000403 | 0.326732486 | 0.465221416 |
| ENSGALG00010000404 | 0.392961713 | 0.112028159 |
| ENSGALG00010000405 | 0.330907906 | 0.058726588 |
| ENSGALG00010000406 | 0.862346384 | 0.298607036 |
| ENSGALG00010000407 | 0.981577317 | 0.351764558 |
| ENSGALG00010000408 | 0.994157083 | 0.357701998 |
| ENSGALG00010000409 | 0.979343569 | 0.417914862 |
| ENSGALG00010000410 | 0.982203399 | 0.419672132 |
| ENSGALG00010000411 | 0.37194389  | 0.094802596 |
| ENSGALG00010000412 | 0.295395629 | 0.203024862 |
| ENSGALG00010000413 | 0.579554629 | 0.139138574 |
| ENSGALG00010000414 | 0.21207558  | 0.182396415 |
| ENSGALG00010000415 | 0.093638077 | 0.188510707 |
| ENSGALG00010000416 | 0.247065276 | 0.177173488 |
| ENSGALG00010000417 | 0.394271748 | 0.144488011 |
| ENSGALG00010000418 | 0.262023223 | 0.070344809 |
| ENSGALG00010000419 | 0.020037043 | 0.234563583 |
| ENSGALG00010000420 | 0.257730745 | 0.073942076 |
| ENSGALG00010000421 | 0.25876306  | 0.010094137 |
| ENSGALG00010000422 | 0.299300116 | 0.20482601  |
| ENSGALG00010000423 | 0.947251556 | 0.42230018  |
| ENSGALG00010000424 | 0.055997904 | 0.195716958 |
| ENSGALG00010000426 | 0.407111757 | 0.409525857 |
| ENSGALG00010000427 | 0.734063942 | 0.178410706 |
| ENSGALG00010000428 | 0.826874641 | 0.155150376 |
| ENSGALG00010000429 | 0.608997345 | 0.112876731 |
| ENSGALG00010000431 | 0.768778609 | 0.256134465 |
| ENSGALG00010000432 | 0.976031569 | 0.292008297 |
| ENSGALG00010000433 | 0.02076408  | 0.146491622 |
| ENSGALG00010000434 | 0.929227567 | 0.286441968 |
| ENSGALG00010000435 | 0.020579242 | 0.106743297 |
| ENSGALG00010000436 | 0.904642271 | 0.525530322 |
| ENSGALG00010000440 | 0.083780209 | 0.084706185 |

|                    |             |             |
|--------------------|-------------|-------------|
| ENSGALG00010000441 | 0.086400909 | 0.181501363 |
| ENSGALG00010000442 | 0.587983253 | 0.04387958  |
| ENSGALG00010000443 | 0.955297529 | 0.266418482 |
| ENSGALG00010000444 | 0.841062506 | 0.178553184 |
| ENSGALG00010000445 | 0.981660531 | 0.330554344 |
| ENSGALG00010000446 | 0.549665779 | 0.171936703 |
| ENSGALG00010000447 | 0.994611335 | 0.336856003 |
| ENSGALG00010000448 | 0.873148724 | 0.291868435 |
| ENSGALG00010000449 | 0.990953737 | 0.2879844   |
| ENSGALG00010000450 | 0.45035876  | 0.008357521 |
| ENSGALG00010000451 | 0.675363589 | 0.215639766 |
| ENSGALG00010000452 | 0.992784145 | 0.32360379  |
| ENSGALG00010000453 | 0.988518243 | 0.309959801 |
| ENSGALG00010000454 | 0.106855453 | 0.091596959 |
| ENSGALG00010000456 | 0.157698299 | 0.38525341  |
| ENSGALG00010000457 | 0.812853405 | 0.100064124 |
| ENSGALG00010000458 | 0.872786117 | 0.239301454 |
| ENSGALG00010000460 | 0.104853295 | 0.446721456 |
| ENSGALG00010000462 | 0.304885028 | 0.17446583  |
| ENSGALG00010000463 | 0.266137114 | 0.107784983 |
| ENSGALG00010000465 | 0.966901785 | 0.306579129 |
| ENSGALG00010000466 | 0.655902536 | 0.297707628 |
| ENSGALG00010000467 | 0.802220433 | 0.20054285  |
| ENSGALG00010000468 | 0.935655336 | 0.280926199 |
| ENSGALG00010000469 | 0.963861279 | 0.305313985 |
| ENSGALG00010000470 | 0.42337818  | 0.012651876 |
| ENSGALG00010000471 | 0.031643804 | 0.167181631 |
| ENSGALG00010000472 | 0.481888728 | 0.178304379 |
| ENSGALG00010000473 | 0.081664875 | 0.26323161  |
| ENSGALG00010000474 | 0.594153712 | 0.200501789 |
| ENSGALG00010000475 | 0.345897105 | 0.036045218 |
| ENSGALG00010000476 | 0.996625865 | 0.33136723  |
| ENSGALG00010000477 | 0.091350892 | 0.530184218 |
| ENSGALG00010000478 | 0.587188482 | 0.373477545 |
| ENSGALG00010000479 | 0.974714037 | 0.316770077 |
| ENSGALG00010000480 | 0.448350069 | 0.332222985 |
| ENSGALG00010000481 | 0.388181886 | 0.168275567 |
| ENSGALG00010000483 | 0.862150391 | 0.115535851 |
| ENSGALG00010000484 | 0.854753159 | 0.354059398 |
| ENSGALG00010000485 | 0.950650414 | 0.327233782 |
| ENSGALG00010000486 | 0.610919343 | 0.023020787 |
| ENSGALG00010000491 | 0.91990148  | 0.297954191 |
| ENSGALG00010000495 | 0.231623601 | 0.005768907 |
| ENSGALG00010000496 | 0.382977183 | 0.103780214 |
| ENSGALG00010000498 | 0.77724314  | 0.257618414 |
| ENSGALG00010000501 | 0.963680723 | 0.260893718 |
| ENSGALG00010000505 | 0.654906861 | 0.226263439 |
| ENSGALG00010000506 | 0.966460017 | 0.382171684 |
| ENSGALG00010000507 | 0.888058054 | 0.330235254 |
| ENSGALG00010000508 | 0.687477304 | 0.003186649 |
| ENSGALG00010000510 | 0.142384954 | 0.051077075 |
| ENSGALG00010000511 | 0.842492527 | 0.406411063 |
| ENSGALG00010000516 | 0.578343939 | 0.29409458  |
| ENSGALG00010000517 | 0.319320077 | 0.024051854 |
| ENSGALG00010000521 | 0.245167    | 0.188148786 |
| ENSGALG00010000522 | 0.172310245 | 0.136743136 |

|                    |             |             |
|--------------------|-------------|-------------|
| ENSGALG00010000523 | 0.400778541 | 0.133797302 |
| ENSGALG00010000525 | 0.432580607 | 0.042291542 |
| ENSGALG00010000526 | 0.444346554 | 0.082214018 |
| ENSGALG00010000527 | 0.134995584 | 0.230697158 |
| ENSGALG00010000529 | 0.942965842 | 0.227664188 |
| ENSGALG00010000532 | 0.899563695 | 0.277536084 |
| ENSGALG00010000535 | 0.076380867 | 0.061149184 |
| ENSGALG00010000539 | 0.181706745 | 0.341650625 |
| ENSGALG00010000541 | 0.402821949 | 0.052686556 |
| ENSGALG00010000542 | 0.38788653  | 0.126003537 |
| ENSGALG00010000543 | 0.468895336 | 0.175379239 |
| ENSGALG00010000544 | 0.645202228 | 0.147673453 |
| ENSGALG00010000546 | 0.36047432  | 0.318888467 |
| ENSGALG00010000547 | 0.022250526 | 0.036379144 |
| ENSGALG00010000548 | 0.646170342 | 0.255506712 |
| ENSGALG00010000549 | 0.247124405 | 0.247622785 |
| ENSGALG00010000551 | 0.828964063 | 0.302895954 |
| ENSGALG00010000552 | 0.373994933 | 0.108284034 |
| ENSGALG00010000553 | 0.579206564 | 0.312995359 |
| ENSGALG00010000554 | 0.02302955  | 0.390011841 |
| ENSGALG00010000555 | 0.96316624  | 0.29587699  |
| ENSGALG00010000556 | 0.537607893 | 0.079681093 |
| ENSGALG00010000558 | 0.116253797 | 0.491843798 |
| ENSGALG00010000559 | 0.318187606 | 0.085406555 |
| ENSGALG00010000560 | 0.154632309 | 0.150717431 |
| ENSGALG00010000561 | 0.183612595 | 0.133653163 |
| ENSGALG00010000562 | 0.920879064 | 0.347307606 |
| ENSGALG00010000563 | 0.271882331 | 0.119653794 |
| ENSGALG00010000564 | 0.847269166 | 0.254778181 |
| ENSGALG00010000565 | 0.995454723 | 0.336726983 |
| ENSGALG00010000566 | 0.156792161 | 0.045135206 |
| ENSGALG00010000567 | 0.627687297 | 0.307967408 |
| ENSGALG00010000569 | 0.762342016 | 0.455683707 |
| ENSGALG00010000570 | 0.845653022 | 0.469071604 |
| ENSGALG00010000571 | 0.996197235 | 0.335893911 |
| ENSGALG00010000573 | 0.048271294 | 0.126898884 |
| ENSGALG00010000574 | 0.987751774 | 0.318694309 |
| ENSGALG00010000575 | 0.68788406  | 0.48094575  |
| ENSGALG00010000576 | 0.91562357  | 0.35018049  |
| ENSGALG00010000577 | 0.952236147 | 0.417337059 |
| ENSGALG00010000578 | 0.978639218 | 0.375669165 |
| ENSGALG00010000579 | 0.338966875 | 0.12816707  |
| ENSGALG00010000580 | 0.584384538 | 0.399805396 |
| ENSGALG00010000581 | 0.959991064 | 0.342699077 |
| ENSGALG00010000582 | 0.368780246 | 0.322100778 |
| ENSGALG00010000583 | 0.699233973 | 0.270054963 |
| ENSGALG00010000584 | 0.774122689 | 0.271761379 |
| ENSGALG00010000585 | 0.627414789 | 0.093589425 |
| ENSGALG00010000586 | 0.978122079 | 0.315587741 |
| ENSGALG00010000587 | 0.419870392 | 0.128064503 |
| ENSGALG00010000588 | 0.453020425 | 0.011538766 |
| ENSGALG00010000589 | 0.967576976 | 0.384485686 |
| ENSGALG00010000590 | 0.345147794 | 0.041702059 |
| ENSGALG00010000591 | 0.988126694 | 0.325331186 |
| ENSGALG00010000592 | 0.238895258 | 0.16534526  |
| ENSGALG00010000593 | 0.366069181 | 0.002907495 |



|                    |             |             |
|--------------------|-------------|-------------|
| ENSGALG00010000595 | 0.98332239  | 0.306634277 |
| ENSGALG00010000596 | 0.69236614  | 0.184504914 |
| ENSGALG00010000598 | 0.520253554 | 0.153938583 |
| ENSGALG00010000599 | 0.936747728 | 0.289864132 |
| ENSGALG00010000601 | 0.737347657 | 0.289061616 |
| ENSGALG00010000602 | 0.172936343 | 0.218353208 |
| ENSGALG00010000603 | 0.927067408 | 0.370554232 |
| ENSGALG00010000604 | 0.568660448 | 0.208043299 |
| ENSGALG00010000605 | 0.394820712 | 0.156611869 |
| ENSGALG00010000606 | 0.972092281 | 0.359653839 |
| ENSGALG00010000607 | 0.469617399 | 0.231538221 |
| ENSGALG00010000608 | 0.38169401  | 0.076457517 |
| ENSGALG00010000610 | 0.91907321  | 0.368014744 |
| ENSGALG00010000612 | 0.699501891 | 0.009452877 |
| ENSGALG00010000613 | 0.952384794 | 0.286378448 |
| ENSGALG00010000614 | 0.962570492 | 0.33738805  |
| ENSGALG00010000615 | 0.520826681 | 0.140755019 |
| ENSGALG00010000616 | 0.947548247 | 0.283580689 |
| ENSGALG00010000618 | 0.61067623  | 0.283350381 |
| ENSGALG00010000619 | 0.633441073 | 0.0489143   |
| ENSGALG00010000620 | 0.161040694 | 0.079968341 |
| ENSGALG00010000621 | 0.238320357 | 0.103958319 |
| ENSGALG00010000622 | 0.277566769 | 0.107857127 |
| ENSGALG00010000623 | 0.681903637 | 0.203417202 |
| ENSGALG00010000625 | 0.605768311 | 0.322652733 |
| ENSGALG00010000626 | 0.147937611 | 0.156140405 |
| ENSGALG00010000627 | 0.363762424 | 0.166941682 |
| ENSGALG00010000628 | 0.609129013 | 0.204497595 |
| ENSGALG00010000629 | 0.104271551 | 0.170685281 |
| ENSGALG00010000630 | 0.461217267 | 0.267499101 |
| ENSGALG00010000632 | 0.48488446  | 0.171836785 |
| ENSGALG00010000633 | 0.090903431 | 0.151998548 |
| ENSGALG00010000634 | 0.055432623 | 0.187407906 |
| ENSGALG00010000635 | 0.550509161 | 0.62058635  |
| ENSGALG00010000636 | 0.848234789 | 0.106807088 |
| ENSGALG00010000637 | 0.264239718 | 0.073427965 |
| ENSGALG00010000638 | 0.362492797 | 0.140212263 |
| ENSGALG00010000639 | 0.9921548   | 0.341279475 |
| ENSGALG00010000641 | 0.645531399 | 0.358268489 |
| ENSGALG00010000642 | 0.394927857 | 0.119113854 |
| ENSGALG00010000643 | 0.810898687 | 0.323100391 |
| ENSGALG00010000645 | 0.812790402 | 0.337156886 |
| ENSGALG00010000646 | 0.506904213 | 0.179461729 |
| ENSGALG00010000647 | 0.246020753 | 0.082628377 |
| ENSGALG00010000648 | 0.06499139  | 0.167344773 |
| ENSGALG00010000649 | 0.66200691  | 0.187107001 |
| ENSGALG00010000650 | 0.954937182 | 0.272482388 |
| ENSGALG00010000651 | 0.194016078 | 0.270879469 |
| ENSGALG00010000652 | 0.907867796 | 0.261489786 |
| ENSGALG00010000653 | 0.709300923 | 0.184755225 |
| ENSGALG00010000654 | 0.123086793 | 0.031111915 |
| ENSGALG00010000655 | 0.635952182 | 0.2006274   |
| ENSGALG00010000656 | 0.36303177  | 0.201320994 |
| ENSGALG00010000657 | 0.010732765 | 0.321159117 |
| ENSGALG00010000658 | 0.392973346 | 0.181481667 |
| ENSGALG00010000659 | 0.124919692 | 0.361760437 |

|                    |             |             |
|--------------------|-------------|-------------|
| ENSGALG00010000660 | 0.886873885 | 0.228665282 |
| ENSGALG00010000661 | 0.377563732 | 0.136077675 |
| ENSGALG00010000662 | 0.041905319 | 0.297804681 |
| ENSGALG00010000663 | 0.833589651 | 0.216340671 |
| ENSGALG00010000665 | 0.503056376 | 0.168109625 |
| ENSGALG00010000666 | 0.907833861 | 0.545986759 |
| ENSGALG00010000668 | 0.456082258 | 0.383423111 |
| ENSGALG00010000670 | 0.683297727 | 0.223694371 |
| ENSGALG00010000672 | 0.691711392 | 0.12319543  |
| ENSGALG00010000673 | 0.925187651 | 0.282651358 |
| ENSGALG00010000674 | 0.3363146   | 0.047049133 |
| ENSGALG00010000675 | 0.265558089 | 0.028821141 |
| ENSGALG00010000676 | 0.474010947 | 0.158763591 |
| ENSGALG00010000677 | 0.070583826 | 0.069304593 |
| ENSGALG00010000680 | 0.335041244 | 0.010885792 |
| ENSGALG00010000681 | 0.603034965 | 0.234890225 |
| ENSGALG00010000682 | 0.200570274 | 0.091667991 |
| ENSGALG00010000683 | 0.366667574 | 0.096374266 |
| ENSGALG00010000684 | 0.895010567 | 0.307481518 |
| ENSGALG00010000685 | 0.423755986 | 0.0644898   |
| ENSGALG00010000686 | 0.401391482 | 0.190857678 |
| ENSGALG00010000687 | 0.952854261 | 0.182320509 |
| ENSGALG00010000688 | 0.098229179 | 0.16563049  |
| ENSGALG00010000689 | 0.489118905 | 0.163768703 |
| ENSGALG00010000691 | 0.00263811  | 0.1342553   |
| ENSGALG00010000692 | 0.392414199 | 0.075936062 |
| ENSGALG00010000693 | 0.279930061 | 0.000456945 |
| ENSGALG00010000694 | 0.653508364 | 0.261197252 |
| ENSGALG00010000695 | 0.235007016 | 0.520920843 |
| ENSGALG00010000696 | 0.650081836 | 0.429237283 |
| ENSGALG00010000697 | 0.001993906 | 0.209044184 |
| ENSGALG00010000698 | 0.794320313 | 0.014161132 |
| ENSGALG00010000699 | 0.693939385 | 0.191447831 |
| ENSGALG00010000700 | 0.374802591 | 0.002966083 |
| ENSGALG00010000701 | 0.953655601 | 0.324813406 |
| ENSGALG00010000702 | 0.980102167 | 0.370022222 |
| ENSGALG00010000703 | 0.050698842 | 0.088610378 |
| ENSGALG00010000704 | 0.864352457 | 0.221195396 |
| ENSGALG00010000705 | 0.509223733 | 0.351645918 |
| ENSGALG00010000706 | 0.830040398 | 0.514864209 |
| ENSGALG00010000707 | 0.839849843 | 0.375525844 |
| ENSGALG00010000708 | 0.736365326 | 0.25891245  |
| ENSGALG00010000709 | 0.591457269 | 0.165820057 |
| ENSGALG00010000710 | 0.381323895 | 0.041653817 |
| ENSGALG00010000711 | 0.916667487 | 0.409667527 |
| ENSGALG00010000712 | 0.423159897 | 0.191787992 |
| ENSGALG00010000713 | 0.09124281  | 0.217585266 |
| ENSGALG00010000714 | 0.841964859 | 0.256076579 |
| ENSGALG00010000715 | 0.939832413 | 0.293353973 |
| ENSGALG00010000716 | 0.323935392 | 0.212341937 |
| ENSGALG00010000717 | 0.895809952 | 0.237590858 |
| ENSGALG00010000718 | 0.934240912 | 0.342755097 |
| ENSGALG00010000719 | 0.327987687 | 0.332338387 |
| ENSGALG00010000720 | 0.215414603 | 0.451410557 |
| ENSGALG00010000721 | 0.771005388 | 0.227462791 |
| ENSGALG00010000722 | 0.878191403 | 0.328095899 |

|                    |             |             |
|--------------------|-------------|-------------|
| ENSGALG00010000724 | 0.683246317 | 0.3846186   |
| ENSGALG00010000725 | 0.096642349 | 0.170010693 |
| ENSGALG00010000726 | 0.394352978 | 0.05219725  |
| ENSGALG00010000727 | 0.18791545  | 0.20047248  |
| ENSGALG00010000728 | 0.748904135 | 0.01633287  |
| ENSGALG00010000729 | 0.988579983 | 0.295415102 |
| ENSGALG00010000730 | 0.98262122  | 0.319541835 |
| ENSGALG00010000731 | 0.413156623 | 0.241050245 |
| ENSGALG00010000732 | 0.971065157 | 0.240358523 |
| ENSGALG00010000733 | 0.28037105  | 0.288808031 |
| ENSGALG00010000734 | 0.002467781 | 0.131919472 |
| ENSGALG00010000735 | 0.183058837 | 0.21641214  |
| ENSGALG00010000736 | 0.216529159 | 0.327121921 |
| ENSGALG00010000737 | 0.55909867  | 0.071277594 |
| ENSGALG00010000738 | 0.474047136 | 0.223221435 |
| ENSGALG00010000739 | 0.090150977 | 0.176974358 |
| ENSGALG00010000740 | 0.001499613 | 0.020129532 |
| ENSGALG00010000741 | 0.918487194 | 0.21398698  |
| ENSGALG00010000742 | 0.228746555 | 0.269680954 |
| ENSGALG00010000743 | 0.105284843 | 0.087359016 |
| ENSGALG00010000747 | 0.119904406 | 0.120665854 |
| ENSGALG00010000749 | 0.267969515 | 0.064590254 |
| ENSGALG00010000752 | 0.565140368 | 0.394231307 |
| ENSGALG00010000753 | 0.935042601 | 0.334738667 |
| ENSGALG00010000754 | 0.436859213 | 0.199712895 |
| ENSGALG00010000757 | 0.687047095 | 0.266755815 |
| ENSGALG00010000760 | 0.164483416 | 0.131728253 |
| ENSGALG00010000761 | 0.385573219 | 0.076032555 |
| ENSGALG00010000762 | 0.571882506 | 0.23817288  |
| ENSGALG00010000763 | 0.752228981 | 0.272323458 |
| ENSGALG00010000764 | 0.333467635 | 0.061370204 |
| ENSGALG00010000765 | 0.357418515 | 0.3009244   |
| ENSGALG00010000766 | 0.270369431 | 0.254012424 |
| ENSGALG00010000767 | 0.021016026 | 0.035635705 |
| ENSGALG00010000768 | 0.342776031 | 0.19828406  |
| ENSGALG00010000769 | 0.187514554 | 0.108479243 |
| ENSGALG00010000770 | 0.448184476 | 0.318943786 |
| ENSGALG00010000771 | 0.218242443 | 0.279314896 |
| ENSGALG00010000772 | 0.41855963  | 0.337359746 |
| ENSGALG00010000773 | 0.270451009 | 0.090541667 |
| ENSGALG00010000775 | 0.080735793 | 0.202761572 |
| ENSGALG00010000776 | 0.11902281  | 0.267794419 |
| ENSGALG00010000777 | 0.443230845 | 0.225509934 |
| ENSGALG00010000778 | 0.395713962 | 0.527203642 |
| ENSGALG00010000779 | 0.181629153 | 0.250726705 |
| ENSGALG00010000780 | 0.694181203 | 0.238394251 |
| ENSGALG00010000782 | 0.013327512 | 0.129304962 |
| ENSGALG00010000783 | 0.985088462 | 0.307624023 |
| ENSGALG00010000784 | 0.267583265 | 0.007934867 |
| ENSGALG00010000785 | 0.957077405 | 0.2943191   |
| ENSGALG00010000786 | 0.253334176 | 0.063564968 |
| ENSGALG00010000787 | 0.738086028 | 0.211845171 |
| ENSGALG00010000788 | 0.978999678 | 0.288883258 |
| ENSGALG00010000789 | 0.589056809 | 0.166178418 |
| ENSGALG00010000790 | 0.61776749  | 0.066831929 |
| ENSGALG00010000791 | 0.948156337 | 0.36479823  |

|                    |             |             |
|--------------------|-------------|-------------|
| ENSGALG00010000792 | 0.058386062 | 0.157650156 |
| ENSGALG00010000794 | 0.962668202 | 0.317810165 |
| ENSGALG00010000795 | 0.383069479 | 0.028024677 |
| ENSGALG00010000796 | 0.08412472  | 0.338155568 |
| ENSGALG00010000797 | 0.914767631 | 0.315076671 |
| ENSGALG00010000798 | 0.83534366  | 0.330258398 |
| ENSGALG00010000799 | 0.887222562 | 0.14227093  |
| ENSGALG00010000800 | 0.635587301 | 0.175884052 |
| ENSGALG00010000802 | 0.751996763 | 0.214813174 |
| ENSGALG00010000803 | 0.85590894  | 0.236252842 |
| ENSGALG00010000805 | 0.809138616 | 0.352042082 |
| ENSGALG00010000806 | 0.84383152  | 0.27422129  |
| ENSGALG00010000807 | 0.213840248 | 0.093335179 |
| ENSGALG00010000808 | 0.391148148 | 0.524511369 |
| ENSGALG00010000810 | 0.259533627 | 0.028380018 |
| ENSGALG00010000811 | 0.399285785 | 0.689270568 |
| ENSGALG00010000812 | 0.513031935 | 0.256367961 |
| ENSGALG00010000813 | 0.677221529 | 0.379329006 |
| ENSGALG00010000814 | 0.709874932 | 0.187981738 |
| ENSGALG00010000815 | 0.599776341 | 0.336749576 |
| ENSGALG00010000816 | 0.973445917 | 0.274384755 |
| ENSGALG00010000817 | 0.929520217 | 0.333808601 |
| ENSGALG00010000818 | 0.887661321 | 0.402140917 |
| ENSGALG00010000819 | 0.685234164 | 0.065584393 |
| ENSGALG00010000820 | 0.960827382 | 0.32180376  |
| ENSGALG00010000821 | 0.930974551 | 0.400783587 |
| ENSGALG00010000822 | 0.976024795 | 0.32163849  |
| ENSGALG00010000823 | 0.050286675 | 0.151020351 |
| ENSGALG00010000829 | 0.277566769 | 0.107857127 |
| ENSGALG00010000835 | 0.381352663 | 0.078374659 |
| ENSGALG00010000841 | 0.208201679 | 0.079142709 |
| ENSGALG00010000843 | 0.94501108  | 0.379866654 |
| ENSGALG00010000853 | 0.85802413  | 0.048866103 |
| ENSGALG00010000855 | 0.306689429 | 0.364030294 |
| ENSGALG00010000857 | 0.969540988 | 0.204086831 |
| ENSGALG00010000858 | 0.433078375 | 0.306178743 |
| ENSGALG00010000859 | 0.47819073  | 0.311726557 |
| ENSGALG00010000861 | 0.246497798 | 0.036590263 |
| ENSGALG00010000863 | 0.986492888 | 0.341331791 |
| ENSGALG00010000864 | 0.925402156 | 0.30812881  |
| ENSGALG00010000865 | 0.344387678 | 0.20026329  |
| ENSGALG00010000867 | 0.162997499 | 0.208257899 |
| ENSGALG00010000868 | 0.557336628 | 0.180668759 |
| ENSGALG00010000869 | 0.947530632 | 0.370796365 |
| ENSGALG00010000870 | 0.851128126 | 0.159591544 |
| ENSGALG00010000872 | 0.352609914 | 0.106490996 |
| ENSGALG00010000873 | 0.61122215  | 0.089160859 |
| ENSGALG00010000874 | 0.39155441  | 0.07460765  |
| ENSGALG00010000880 | 0.796328458 | 0.249156219 |
| ENSGALG00010000885 | 0.768051054 | 0.23400839  |
| ENSGALG00010000887 | 0.648259535 | 0.169506222 |
| ENSGALG00010000888 | 0.500902519 | 0.568238169 |
| ENSGALG00010000896 | 0.38480368  | 0.180523942 |
| ENSGALG00010000897 | 0.748632226 | 0.08912014  |
| ENSGALG00010000901 | 0.251162536 | 0.205519984 |
| ENSGALG00010000902 | 0.264239718 | 0.073427965 |

|                    |             |             |
|--------------------|-------------|-------------|
| ENSGALG00010000909 | 0.350862304 | 0.103149209 |
| ENSGALG00010000911 | 0.231348001 | 0.150820468 |
| ENSGALG00010000913 | 0.671374452 | 0.272693857 |
| ENSGALG00010000914 | 0.113066118 | 0.064825726 |
| ENSGALG00010000916 | 0.758940101 | 0.235566598 |
| ENSGALG00010000923 | 0.082559758 | 0.13783377  |
| ENSGALG00010000925 | 0.203991683 | 0.058221925 |
| ENSGALG00010000926 | 0.563723727 | 0.482133449 |
| ENSGALG00010000935 | 0.388773945 | 0.124549697 |
| ENSGALG00010000936 | 0.297449338 | 0.622836754 |
| ENSGALG00010000939 | 0.520878278 | 0.20346952  |
| ENSGALG00010000941 | 0.491335246 | 0.181035858 |
| ENSGALG00010000945 | 0.577297802 | 0.200688425 |
| ENSGALG00010000949 | 0.738186813 | 0.250919862 |
| ENSGALG00010000950 | 0.667960762 | 0.235327929 |
| ENSGALG00010000952 | 0.271701261 | 0.072417625 |
| ENSGALG00010000953 | 0.591738803 | 0.1859785   |
| ENSGALG00010000955 | 0.012059079 | 0.093716972 |
| ENSGALG00010000959 | 0.440461385 | 0.381737937 |
| ENSGALG00010000962 | 0.005772544 | 0.38822656  |
| ENSGALG00010000963 | 0.167414966 | 0.046468263 |
| ENSGALG00010000966 | 0.249038452 | 0.000989663 |
| ENSGALG00010000971 | 0.269800455 | 0.283735606 |
| ENSGALG00010000985 | 0.189240572 | 0.04996112  |
| ENSGALG00010000987 | 0.493098418 | 0.178919939 |
| ENSGALG00010000988 | 0.396343306 | 0.152518913 |
| ENSGALG00010000990 | 0.189240572 | 0.04996112  |
| ENSGALG00010001001 | 0.190478359 | 0.148106019 |
| ENSGALG00010001005 | 0.386311561 | 0.13402198  |
| ENSGALG00010001013 | 0.44902746  | 0.081626457 |
| ENSGALG00010001027 | 0.231046558 | 0.260485545 |
| ENSGALG00010001032 | 0.586685326 | 0.215239956 |
| ENSGALG00010001033 | 0.184279383 | 0.116835035 |
| ENSGALG00010001049 | 0.964957502 | 0.320023008 |
| ENSGALG00010001050 | 0.928214275 | 0.301063528 |
| ENSGALG00010001051 | 0.917612333 | 0.282314381 |
| ENSGALG00010001053 | 0.968750363 | 0.381529902 |
| ENSGALG00010001055 | 0.583232869 | 0.362586675 |
| ENSGALG00010001056 | 0.261823381 | 0.37057578  |
| ENSGALG00010001057 | 0.737446774 | 0.179382874 |
| ENSGALG00010001058 | 0.733811594 | 0.184568221 |
| ENSGALG00010001059 | 0.175265693 | 0.184386624 |
| ENSGALG00010001060 | 0.545321161 | 0.160014083 |
| ENSGALG00010001061 | 0.716206608 | 0.272267913 |
| ENSGALG00010001064 | 0.127700027 | 0.11783144  |
| ENSGALG00010001065 | 0.801903936 | 0.503358997 |
| ENSGALG00010001066 | 0.991502638 | 0.282822076 |
| ENSGALG00010001067 | 0.223002124 | 0.106656109 |
| ENSGALG00010001069 | 0.435970087 | 0.291087418 |
| ENSGALG00010001070 | 0.294089512 | 0.008747479 |
| ENSGALG00010001074 | 0.787700821 | 0.291581586 |
| ENSGALG00010001075 | 0.109616876 | 0.103395309 |
| ENSGALG00010001080 | 0.297090418 | 0.136289521 |
| ENSGALG00010001081 | 0.687101185 | 0.371520664 |
| ENSGALG00010001082 | 0.990239058 | 0.279211778 |
| ENSGALG00010001083 | 0.009812001 | 0.5166245   |

|                    |             |             |
|--------------------|-------------|-------------|
| ENSGALG00010001085 | 0.972513256 | 0.412092035 |
| ENSGALG00010001086 | 0.219386918 | 0.079388121 |
| ENSGALG00010001088 | 0.233289764 | 0.110817619 |
| ENSGALG00010001098 | 0.026681103 | 0.120260695 |
| ENSGALG00010001101 | 0.120169729 | 0.149706176 |
| ENSGALG00010001104 | 0.984698301 | 0.301299835 |
| ENSGALG00010001111 | 0.389170958 | 0.354003212 |
| ENSGALG00010001112 | 0.813303316 | 0.41847683  |
| ENSGALG00010001113 | 0.271659883 | 0.230327378 |
| ENSGALG00010001114 | 0.02590484  | 0.138054293 |
| ENSGALG00010001115 | 0.275961505 | 0.301638601 |
| ENSGALG00010001116 | 0.948769618 | 0.300248965 |
| ENSGALG00010001117 | 0.919682693 | 0.299868713 |
| ENSGALG00010001118 | 0.922378407 | 0.134939957 |
| ENSGALG00010001119 | 0.076976416 | 0.286338669 |
| ENSGALG00010001120 | 0.051606007 | 0.145348651 |
| ENSGALG00010001121 | 0.943740601 | 0.273213395 |
| ENSGALG00010001122 | 0.482236926 | 0.097115734 |
| ENSGALG00010001123 | 0.967295573 | 0.353427806 |
| ENSGALG00010001124 | 0.687048326 | 0.281688812 |
| ENSGALG00010001125 | 0.935719244 | 0.26379196  |
| ENSGALG00010001126 | 0.175696376 | 0.006120429 |
| ENSGALG00010001127 | 0.784856492 | 0.30519224  |
| ENSGALG00010001128 | 0.520193903 | 0.118130497 |
| ENSGALG00010001129 | 0.992061614 | 0.316685058 |
| ENSGALG00010001130 | 0.495892281 | 0.20079274  |
| ENSGALG00010001131 | 0.914622952 | 0.30794593  |
| ENSGALG00010001132 | 0.951861344 | 0.291800479 |
| ENSGALG00010001133 | 0.521356491 | 0.170676861 |
| ENSGALG00010001134 | 0.622284656 | 0.403731657 |
| ENSGALG00010001135 | 0.991581021 | 0.312692434 |
| ENSGALG00010001136 | 0.925553306 | 0.324176354 |
| ENSGALG00010001138 | 0.66307778  | 0.209719503 |
| ENSGALG00010001140 | 0.97684698  | 0.254646761 |
| ENSGALG00010001141 | 0.398911711 | 0.183310111 |
| ENSGALG00010001142 | 0.919772349 | 0.234360435 |
| ENSGALG00010001143 | 0.884412236 | 0.19602128  |
| ENSGALG00010001144 | 0.972399666 | 0.342414652 |
| ENSGALG00010001145 | 0.946759492 | 0.383228112 |
| ENSGALG00010001146 | 0.923377753 | 0.293317784 |
| ENSGALG00010001147 | 0.472042878 | 0.207071835 |
| ENSGALG00010001148 | 0.357613792 | 0.16703301  |
| ENSGALG00010001149 | 0.984192496 | 0.293131814 |
| ENSGALG00010001150 | 0.957904527 | 0.172242387 |
| ENSGALG00010001151 | 0.934982943 | 0.366997894 |
| ENSGALG00010001152 | 0.949067357 | 0.318923599 |
| ENSGALG00010001153 | 0.879765785 | 0.381299079 |
| ENSGALG00010001154 | 0.81530522  | 0.338921279 |
| ENSGALG00010001155 | 0.989072425 | 0.313753156 |
| ENSGALG00010001156 | 0.865912654 | 0.445440567 |
| ENSGALG00010001157 | 0.796191704 | 0.300757405 |
| ENSGALG00010001158 | 0.837310052 | 0.30043804  |
| ENSGALG00010001159 | 0.898002633 | 0.074854126 |
| ENSGALG00010001160 | 0.645521039 | 0.356239991 |
| ENSGALG00010001161 | 0.970128527 | 0.287721437 |
| ENSGALG00010001162 | 0.616859806 | 0.535510285 |

|                    |             |             |
|--------------------|-------------|-------------|
| ENSGALG00010001163 | 0.149813559 | 0.047275671 |
| ENSGALG00010001164 | 0.984780592 | 0.299141616 |
| ENSGALG00010001165 | 0.051337923 | 0.170540381 |
| ENSGALG00010001166 | 0.77299726  | 0.351863144 |
| ENSGALG00010001167 | 0.731530095 | 0.285063838 |
| ENSGALG00010001168 | 0.206156519 | 0.119397962 |
| ENSGALG00010001169 | 0.095978937 | 0.110042855 |
| ENSGALG00010001170 | 0.428211648 | 0.32117406  |
| ENSGALG00010001171 | 0.900067449 | 0.276225049 |
| ENSGALG00010001172 | 0.881246719 | 0.43027212  |
| ENSGALG00010001173 | 0.179652839 | 0.133643202 |
| ENSGALG00010001174 | 0.808875597 | 0.222068899 |
| ENSGALG00010001176 | 0.46947767  | 0.201570798 |
| ENSGALG00010001177 | 0.927056218 | 0.448417871 |
| ENSGALG00010001178 | 0.933129166 | 0.296842992 |
| ENSGALG00010001179 | 0.929988047 | 0.233337476 |
| ENSGALG00010001180 | 0.785641965 | 0.478364753 |
| ENSGALG00010001181 | 0.878230584 | 0.340578104 |
| ENSGALG00010001182 | 0.394044966 | 0.350180127 |
| ENSGALG00010001183 | 0.978500661 | 0.293623614 |
| ENSGALG00010001185 | 0.944866864 | 0.322406173 |
| ENSGALG00010001187 | 0.168153459 | 0.063314642 |
| ENSGALG00010001188 | 0.517374795 | 0.018986273 |
| ENSGALG00010001190 | 0.505222578 | 0.245276513 |
| ENSGALG00010001191 | 0.932180426 | 0.300261367 |
| ENSGALG00010001192 | 0.990768009 | 0.288191265 |
| ENSGALG00010001193 | 0.832068688 | 0.314031777 |
| ENSGALG00010001194 | 0.748544357 | 0.509322413 |
| ENSGALG00010001195 | 0.910082858 | 0.234165412 |
| ENSGALG00010001196 | 0.992926457 | 0.328846159 |
| ENSGALG00010001197 | 0.647607752 | 0.184440023 |
| ENSGALG00010001198 | 0.704130601 | 0.258710142 |
| ENSGALG00010001199 | 0.914571589 | 0.266624582 |
| ENSGALG00010001200 | 0.984622378 | 0.304188605 |
| ENSGALG00010001201 | 0.538280579 | 0.247935763 |
| ENSGALG00010001202 | 0.71454387  | 0.209812007 |
| ENSGALG00010001203 | 0.838745523 | 0.360706925 |
| ENSGALG00010001204 | 0.828688091 | 0.429624782 |
| ENSGALG00010001205 | 0.922323525 | 0.349362271 |
| ENSGALG00010001206 | 0.981154768 | 0.258110575 |
| ENSGALG00010001208 | 0.857665541 | 0.276486299 |
| ENSGALG00010001209 | 0.302736334 | 0.117713433 |
| ENSGALG00010001210 | 0.188953919 | 0.226739868 |
| ENSGALG00010001212 | 0.134103264 | 0.157215272 |
| ENSGALG00010001213 | 0.781688004 | 0.317418976 |
| ENSGALG00010001214 | 0.456594099 | 0.21572423  |
| ENSGALG00010001216 | 0.350713899 | 0.089775552 |
| ENSGALG00010001218 | 0.846562874 | 0.344173492 |
| ENSGALG00010001219 | 0.985792121 | 0.269022672 |
| ENSGALG00010001220 | 0.959152049 | 0.383048598 |
| ENSGALG00010001221 | 0.904407802 | 0.217282962 |
| ENSGALG00010001222 | 0.879958089 | 0.505924045 |
| ENSGALG00010001224 | 0.629624    | 0.351573056 |
| ENSGALG00010001225 | 0.663540002 | 0.354328783 |
| ENSGALG00010001226 | 0.98257608  | 0.241769331 |
| ENSGALG00010001228 | 0.327558125 | 0.093845166 |

|                    |             |             |
|--------------------|-------------|-------------|
| ENSGALG00010001229 | 0.138201654 | 0.2107437   |
| ENSGALG00010001230 | 0.718794654 | 0.207387275 |
| ENSGALG00010001231 | 0.779570166 | 0.181427586 |
| ENSGALG00010001232 | 0.994750348 | 0.330891367 |
| ENSGALG00010001233 | 0.66877584  | 0.174349239 |
| ENSGALG00010001234 | 0.124155238 | 0.206242682 |
| ENSGALG00010001235 | 0.578022969 | 0.186966325 |
| ENSGALG00010001236 | 0.089535689 | 0.238912045 |
| ENSGALG00010001237 | 0.636415415 | 0.183588997 |
| ENSGALG00010001238 | 0.991766889 | 0.30523938  |
| ENSGALG00010001239 | 0.698597704 | 0.095188817 |
| ENSGALG00010001242 | 0.495248153 | 0.172088977 |
| ENSGALG00010001244 | 0.096102445 | 0.254986452 |
| ENSGALG00010001245 | 0.800180114 | 0.166228461 |
| ENSGALG00010001248 | 0.385849847 | 0.039478853 |
| ENSGALG00010001249 | 0.734534758 | 0.118691464 |
| ENSGALG00010001251 | 0.702543597 | 0.430212373 |
| ENSGALG00010001252 | 0.972945002 | 0.337721692 |
| ENSGALG00010001253 | 0.398890409 | 0.187679725 |
| ENSGALG00010001254 | 0.946694623 | 0.271518618 |
| ENSGALG00010001258 | 0.544803247 | 0.003101316 |
| ENSGALG00010001262 | 0.970369423 | 0.371720378 |
| ENSGALG00010001264 | 0.937252582 | 0.15030668  |
| ENSGALG00010001265 | 0.885396882 | 0.297019726 |
| ENSGALG00010001267 | 0.926123366 | 0.30904842  |
| ENSGALG00010001268 | 0.389213719 | 0.196872086 |
| ENSGALG00010001270 | 0.985331603 | 0.313435589 |
| ENSGALG00010001271 | 0.977539417 | 0.312090724 |
| ENSGALG00010001273 | 0.381702061 | 0.247063428 |
| ENSGALG00010001274 | 0.097086638 | 0.340317564 |
| ENSGALG00010001276 | 0.335584327 | 0.130874902 |
| ENSGALG00010001277 | 0.869303144 | 0.266645962 |
| ENSGALG00010001279 | 0.982528745 | 0.300940182 |
| ENSGALG00010001281 | 0.59905298  | 0.161305222 |
| ENSGALG00010001283 | 0.916802651 | 0.35288319  |
| ENSGALG00010001285 | 0.920085173 | 0.307635774 |
| ENSGALG00010001286 | 0.005805532 | 0.058084496 |
| ENSGALG00010001287 | 0.441547902 | 0.047460264 |
| ENSGALG00010001288 | 0.886113925 | 0.296275427 |
| ENSGALG00010001289 | 0.731831344 | 0.173624593 |
| ENSGALG00010001291 | 0.97366064  | 0.319977699 |
| ENSGALG00010001292 | 0.818457597 | 0.417622859 |
| ENSGALG00010001294 | 0.010206714 | 0.093552912 |
| ENSGALG00010001295 | 0.117267781 | 0.261824861 |
| ENSGALG00010001297 | 0.285828431 | 0.622258824 |
| ENSGALG00010001298 | 0.828083783 | 0.617238526 |
| ENSGALG00010001300 | 0.801717418 | 0.027042427 |
| ENSGALG00010001301 | 0.982051018 | 0.273447279 |
| ENSGALG00010001302 | 0.270451009 | 0.090541667 |
| ENSGALG00010001304 | 0.188246224 | 0.038506068 |
| ENSGALG00010001305 | 0.732573064 | 0.332200565 |
| ENSGALG00010001306 | 0.164830975 | 0.437922329 |
| ENSGALG00010001307 | 0.662098907 | 0.008618864 |
| ENSGALG00010001308 | 0.980799884 | 0.292671151 |
| ENSGALG00010001309 | 0.823920396 | 0.444695425 |
| ENSGALG00010001310 | 0.890005788 | 0.260834519 |



|                    |             |             |
|--------------------|-------------|-------------|
| ENSGALG00010001311 | 0.480772329 | 0.183615671 |
| ENSGALG00010001313 | 0.553111895 | 0.352845955 |
| ENSGALG00010001318 | 0.487599556 | 0.252036288 |
| ENSGALG00010001319 | 0.231178716 | 0.152554667 |
| ENSGALG00010001320 | 0.930349368 | 0.256774094 |
| ENSGALG00010001321 | 0.498819913 | 0.248903727 |
| ENSGALG00010001322 | 0.830183703 | 0.398343795 |
| ENSGALG00010001323 | 0.65984337  | 0.200693038 |
| ENSGALG00010001325 | 0.625907938 | 0.218461345 |
| ENSGALG00010001327 | 0.925473388 | 0.263999823 |
| ENSGALG00010001328 | 0.909973808 | 0.329331783 |
| ENSGALG00010001330 | 0.718194095 | 0.22608778  |
| ENSGALG00010001331 | 0.800243761 | 0.312317286 |
| ENSGALG00010001333 | 0.410004785 | 0.039327832 |
| ENSGALG00010001334 | 0.967086644 | 0.395370252 |
| ENSGALG00010001335 | 0.341050152 | 0.388294636 |
| ENSGALG00010001338 | 0.256828349 | 0.119064955 |
| ENSGALG00010001340 | 0.366810591 | 0.293049106 |
| ENSGALG00010001341 | 0.465301817 | 0.194135365 |
| ENSGALG00010001342 | 0.023279831 | 0.134374301 |
| ENSGALG00010001343 | 0.636788244 | 0.187733018 |
| ENSGALG00010001345 | 0.388181886 | 0.168275567 |
| ENSGALG00010001346 | 0.324607775 | 0.333271277 |
| ENSGALG00010001347 | 0.993282669 | 0.342037897 |
| ENSGALG00010001349 | 0.638479388 | 0.429419475 |
| ENSGALG00010001350 | 0.716773391 | 0.094512372 |
| ENSGALG00010001351 | 0.996806728 | 0.329945704 |
| ENSGALG00010001352 | 0.782925301 | 0.203341705 |
| ENSGALG00010001353 | 0.979720931 | 0.30880498  |
| ENSGALG00010001355 | 0.374500718 | 0.179369714 |
| ENSGALG00010001356 | 0.277566769 | 0.107857127 |
| ENSGALG00010001357 | 0.718275528 | 0.237906344 |
| ENSGALG00010001358 | 0.062582014 | 0.03532597  |
| ENSGALG00010001359 | 0.284539265 | 0.23921182  |
| ENSGALG00010001360 | 0.578677231 | 0.222015005 |
| ENSGALG00010001361 | 0.654232866 | 0.229730979 |
| ENSGALG00010001363 | 0.919719389 | 0.32436915  |
| ENSGALG00010001364 | 0.923156164 | 0.309833899 |
| ENSGALG00010001365 | 0.440319304 | 0.047504119 |
| ENSGALG00010001366 | 0.307350977 | 0.089221936 |
| ENSGALG00010001367 | 0.253296461 | 0.15039664  |
| ENSGALG00010001368 | 0.802456047 | 0.196400888 |
| ENSGALG00010001369 | 0.547426952 | 0.40627332  |
| ENSGALG00010001371 | 0.436203673 | 0.194694662 |
| ENSGALG00010001372 | 0.738431394 | 0.730462124 |
| ENSGALG00010001373 | 0.98415855  | 0.381033985 |
| ENSGALG00010001374 | 0.265558089 | 0.028821141 |
| ENSGALG00010001375 | 0.703548476 | 0.449087711 |
| ENSGALG00010001376 | 0.707302773 | 0.061365446 |
| ENSGALG00010001377 | 0.28880012  | 0.418789177 |
| ENSGALG00010001378 | 0.659867928 | 0.022906883 |
| ENSGALG00010001380 | 0.766937672 | 0.280414555 |
| ENSGALG00010001381 | 0.341280867 | 0.461612355 |
| ENSGALG00010001382 | 0.932050963 | 0.354779087 |
| ENSGALG00010001384 | 0.422989801 | 0.19893951  |
| ENSGALG00010001385 | 0.951012258 | 0.336988458 |

|                    |             |             |
|--------------------|-------------|-------------|
| ENSGALG00010001386 | 0.056923469 | 0.063015847 |
| ENSGALG00010001387 | 0.035158038 | 0.119871525 |
| ENSGALG00010001388 | 0.713874085 | 0.401948637 |
| ENSGALG00010001390 | 0.903862835 | 0.409230518 |
| ENSGALG00010001395 | 0.820475903 | 0.331735209 |
| ENSGALG00010001397 | 0.016651787 | 0.116556206 |
| ENSGALG00010001398 | 0.950289177 | 0.38445702  |
| ENSGALG00010001400 | 0.93933928  | 0.223920235 |
| ENSGALG00010001401 | 0.262922434 | 0.138601464 |
| ENSGALG00010001402 | 0.956883142 | 0.245549636 |
| ENSGALG00010001404 | 0.021308589 | 0.164876077 |
| ENSGALG00010001406 | 0.423518038 | 0.111172615 |
| ENSGALG00010001407 | 0.984126133 | 0.324823941 |
| ENSGALG00010001410 | 0.40135901  | 0.158038591 |
| ENSGALG00010001411 | 0.942478125 | 0.294988164 |
| ENSGALG00010001412 | 0.501234631 | 0.063163522 |
| ENSGALG00010001414 | 0.666347626 | 0.443521705 |
| ENSGALG00010001415 | 0.972938853 | 0.240063339 |
| ENSGALG00010001416 | 0.248995672 | 0.13018674  |
| ENSGALG00010001418 | 0.846371061 | 0.419319896 |
| ENSGALG00010001419 | 0.225118777 | 0.607085928 |
| ENSGALG00010001420 | 0.490141705 | 0.21869336  |
| ENSGALG00010001422 | 0.914809266 | 0.159317897 |
| ENSGALG00010001423 | 0.944134983 | 0.270737734 |
| ENSGALG00010001425 | 0.677356602 | 0.04046161  |
| ENSGALG00010001426 | 0.96613022  | 0.243951491 |
| ENSGALG00010001427 | 0.997103776 | 0.320865225 |
| ENSGALG00010001429 | 0.949815082 | 0.3912454   |
| ENSGALG00010001432 | 0.42236827  | 0.123421679 |
| ENSGALG00010001435 | 0.10546932  | 0.463318278 |
| ENSGALG00010001436 | 0.987530324 | 0.265391071 |
| ENSGALG00010001437 | 0.647799221 | 0.250577497 |
| ENSGALG00010001440 | 0.977680392 | 0.375539164 |
| ENSGALG00010001441 | 0.937396715 | 0.310301761 |
| ENSGALG00010001442 | 0.939767268 | 0.303763435 |
| ENSGALG00010001443 | 0.128324049 | 0.114818801 |
| ENSGALG00010001445 | 0.393302098 | 0.14073727  |
| ENSGALG00010001447 | 0.550217361 | 0.243867474 |
| ENSGALG00010001448 | 0.282305083 | 0.450438657 |
| ENSGALG00010001450 | 0.465585317 | 0.380861732 |
| ENSGALG00010001451 | 0.399452143 | 0.144662594 |
| ENSGALG00010001453 | 0.239238081 | 0.080377374 |
| ENSGALG00010001454 | 0.936983561 | 0.308704061 |
| ENSGALG00010001456 | 0.218666623 | 0.042118554 |
| ENSGALG00010001457 | 0.868109943 | 0.430085416 |
| ENSGALG00010001458 | 0.833577834 | 0.413733418 |
| ENSGALG00010001460 | 0.951218696 | 0.298060856 |
| ENSGALG00010001461 | 0.973075746 | 0.327390069 |
| ENSGALG00010001462 | 0.830949376 | 0.180358492 |
| ENSGALG00010001463 | 0.379228237 | 0.241303646 |
| ENSGALG00010001465 | 0.981201705 | 0.29451684  |
| ENSGALG00010001466 | 0.895565745 | 0.39630577  |
| ENSGALG00010001468 | 0.956028122 | 0.386065616 |
| ENSGALG00010001469 | 0.966142136 | 0.169205395 |
| ENSGALG00010001470 | 0.185453987 | 0.140651822 |
| ENSGALG00010001471 | 0.843460539 | 0.406809018 |

|                    |             |             |
|--------------------|-------------|-------------|
| ENSGALG00010001475 | 0.290506567 | 0.103490682 |
| ENSGALG00010001476 | 0.436601883 | 0.293204036 |
| ENSGALG00010001477 | 0.694033419 | 0.420663464 |
| ENSGALG00010001479 | 0.937190815 | 0.313391446 |
| ENSGALG00010001480 | 0.403848943 | 0.500569498 |
| ENSGALG00010001482 | 0.905495585 | 0.390399175 |
| ENSGALG00010001483 | 0.77288074  | 0.28072602  |
| ENSGALG00010001486 | 0.320368116 | 0.565662666 |
| ENSGALG00010001487 | 0.700081473 | 0.342546251 |
| ENSGALG00010001488 | 0.298217676 | 0.010575877 |
| ENSGALG00010001491 | 0.967793297 | 0.347921802 |
| ENSGALG00010001492 | 0.150508738 | 0.088614097 |
| ENSGALG00010001493 | 0.002319943 | 0.47043011  |
| ENSGALG00010001495 | 0.95650391  | 0.424737896 |
| ENSGALG00010001496 | 0.980469216 | 0.332062559 |
| ENSGALG00010001497 | 0.920410126 | 0.418410465 |
| ENSGALG00010001499 | 0.598022336 | 0.232241162 |
| ENSGALG00010001501 | 0.97743339  | 0.286296564 |
| ENSGALG00010001504 | 0.14369534  | 0.072015335 |
| ENSGALG00010001505 | 0.876580963 | 0.302289175 |
| ENSGALG00010001506 | 0.533176119 | 0.090786783 |
| ENSGALG00010001507 | 0.865638367 | 0.159465725 |
| ENSGALG00010001508 | 0.037941496 | 0.119350675 |
| ENSGALG00010001510 | 0.600551781 | 0.137480743 |
| ENSGALG00010001511 | 0.582080219 | 0.174219582 |
| ENSGALG00010001512 | 0.97350601  | 0.300087721 |
| ENSGALG00010001513 | 0.551966622 | 0.181572207 |
| ENSGALG00010001514 | 0.996378251 | 0.326298221 |
| ENSGALG00010001516 | 0.640524801 | 0.048921745 |
| ENSGALG00010001517 | 0.974767214 | 0.35562217  |
| ENSGALG00010001518 | 0.965400208 | 0.332704703 |
| ENSGALG00010001519 | 0.324368703 | 0.149815344 |
| ENSGALG00010001520 | 0.153460003 | 0.294851523 |
| ENSGALG00010001521 | 0.899899607 | 0.311711377 |
| ENSGALG00010001524 | 0.984055507 | 0.33961461  |
| ENSGALG00010001525 | 0.909570625 | 0.225743789 |
| ENSGALG00010001526 | 0.989343726 | 0.327832331 |
| ENSGALG00010001527 | 0.443102846 | 0.18234284  |
| ENSGALG00010001528 | 0.335807076 | 0.117362214 |
| ENSGALG00010001529 | 0.910854377 | 0.295168809 |
| ENSGALG00010001531 | 0.411821802 | 0.235910741 |
| ENSGALG00010001532 | 0.915059177 | 0.23622365  |
| ENSGALG00010001533 | 0.668797069 | 0.320495311 |
| ENSGALG00010001534 | 0.843200893 | 0.417165944 |
| ENSGALG00010001535 | 0.116542343 | 0.132380464 |
| ENSGALG00010001536 | 0.076005904 | 0.271008244 |
| ENSGALG00010001537 | 0.86772009  | 0.204589202 |
| ENSGALG00010001538 | 0.120761508 | 0.175560081 |
| ENSGALG00010001540 | 0.934490807 | 0.267615286 |
| ENSGALG00010001541 | 0.584861539 | 0.203315769 |
| ENSGALG00010001542 | 0.948103249 | 0.243272543 |
| ENSGALG00010001543 | 0.964750735 | 0.362011687 |
| ENSGALG00010001545 | 0.583103108 | 0.191823962 |
| ENSGALG00010001546 | 0.915532377 | 0.39636128  |
| ENSGALG00010001547 | 0.963460076 | 0.33578262  |
| ENSGALG00010001548 | 0.352313449 | 0.307693974 |

|                    |             |             |
|--------------------|-------------|-------------|
| ENSGALG00010001551 | 0.988946626 | 0.336486925 |
| ENSGALG00010001552 | 0.028270611 | 0.072037719 |
| ENSGALG00010001553 | 0.252661814 | 0.074787931 |
| ENSGALG00010001554 | 0.519587055 | 0.236739008 |
| ENSGALG00010001556 | 0.673586903 | 0.232079701 |
| ENSGALG00010001557 | 0.986750629 | 0.305576355 |
| ENSGALG00010001558 | 0.344496224 | 0.336183711 |
| ENSGALG00010001559 | 0.950416345 | 0.35954184  |
| ENSGALG00010001560 | 0.462436136 | 0.24773472  |
| ENSGALG00010001561 | 0.703258159 | 0.254663502 |
| ENSGALG00010001563 | 0.387473629 | 0.117811347 |
| ENSGALG00010001565 | 0.349705454 | 0.096072153 |
| ENSGALG00010001567 | 0.540232484 | 0.245057796 |
| ENSGALG00010001570 | 0.551027924 | 0.276687238 |
| ENSGALG00010001573 | 0.48775796  | 0.189318879 |
| ENSGALG00010001574 | 0.1147801   | 0.220113731 |
| ENSGALG00010001575 | 0.858340807 | 0.271859779 |
| ENSGALG00010001576 | 0.392894344 | 0.133607003 |
| ENSGALG00010001577 | 0.295661329 | 0.120963357 |
| ENSGALG00010001578 | 0.968720989 | 0.340570977 |
| ENSGALG00010001579 | 0.374872911 | 0.136540542 |
| ENSGALG00010001580 | 0.288795251 | 0.418569519 |
| ENSGALG00010001581 | 0.062239627 | 0.209982906 |
| ENSGALG00010001582 | 0.277566769 | 0.107857127 |
| ENSGALG00010001583 | 0.022148785 | 0.104742673 |
| ENSGALG00010001584 | 0.82482813  | 0.129304612 |
| ENSGALG00010001585 | 0.661841721 | 0.017064297 |
| ENSGALG00010001586 | 0.59501695  | 0.415542455 |
| ENSGALG00010001587 | 0.100271802 | 0.218393156 |
| ENSGALG00010001588 | 0.603726241 | 0.120235869 |
| ENSGALG00010001590 | 0.527596017 | 0.10475464  |
| ENSGALG00010001592 | 0.135367345 | 0.125686785 |
| ENSGALG00010001593 | 0.937578499 | 0.464484255 |
| ENSGALG00010001594 | 0.728516285 | 0.466525655 |
| ENSGALG00010001595 | 0.682827949 | 0.390350763 |
| ENSGALG00010001597 | 0.973219567 | 0.376141658 |
| ENSGALG00010001598 | 0.143204296 | 0.159562468 |
| ENSGALG00010001599 | 0.851379433 | 0.245586073 |
| ENSGALG00010001600 | 0.279119344 | 0.061522979 |
| ENSGALG00010001604 | 0.982650827 | 0.303196378 |
| ENSGALG00010001605 | 0.359400241 | 0.191093242 |
| ENSGALG00010001606 | 0.431195439 | 0.220837769 |
| ENSGALG00010001607 | 0.379394869 | 0.170237467 |
| ENSGALG00010001609 | 0.38485223  | 0.180377061 |
| ENSGALG00010001610 | 0.479828286 | 0.188515705 |
| ENSGALG00010001611 | 0.764324375 | 0.021834869 |
| ENSGALG00010001612 | 0.992457233 | 0.341522387 |
| ENSGALG00010001614 | 0.974457935 | 0.328911337 |
| ENSGALG00010001616 | 0.886163884 | 0.316312033 |
| ENSGALG00010001617 | 0.757975382 | 0.582841337 |
| ENSGALG00010001618 | 0.926583983 | 0.25451735  |
| ENSGALG00010001619 | 0.723661709 | 0.22067569  |
| ENSGALG00010001620 | 0.862107596 | 0.436447512 |
| ENSGALG00010001621 | 0.503281868 | 0.463210458 |
| ENSGALG00010001622 | 0.438124912 | 0.15068347  |
| ENSGALG00010001624 | 0.307131788 | 0.322787596 |

|                    |             |             |
|--------------------|-------------|-------------|
| ENSGALG00010001625 | 0.475781087 | 0.149245505 |
| ENSGALG00010001627 | 0.362859878 | 0.378888076 |
| ENSGALG00010001628 | 0.94006089  | 0.205803618 |
| ENSGALG00010001631 | 0.360541296 | 0.175664672 |
| ENSGALG00010001632 | 0.07617994  | 0.020712389 |
| ENSGALG00010001633 | 0.800513891 | 0.380052578 |
| ENSGALG00010001635 | 0.828194899 | 0.249673442 |
| ENSGALG00010001639 | 0.776995608 | 0.146484686 |
| ENSGALG00010001640 | 0.890955123 | 0.251690966 |
| ENSGALG00010001642 | 0.912000165 | 0.393563357 |
| ENSGALG00010001647 | 0.810441135 | 0.256062754 |
| ENSGALG00010001648 | 0.871939945 | 0.274022325 |
| ENSGALG00010001649 | 0.692090679 | 0.001025962 |
| ENSGALG00010001652 | 0.852191898 | 0.275451212 |
| ENSGALG00010001653 | 0.36238761  | 0.287206834 |
| ENSGALG00010001654 | 0.939415852 | 0.324840722 |
| ENSGALG00010001657 | 0.940079655 | 0.42791466  |
| ENSGALG00010001660 | 0.193165979 | 0.245970706 |
| ENSGALG00010001661 | 0.825576724 | 0.251015792 |
| ENSGALG00010001662 | 0.416210059 | 0.33118846  |
| ENSGALG00010001665 | 0.745571439 | 0.341027931 |
| ENSGALG00010001666 | 0.515759654 | 0.229055281 |
| ENSGALG00010001667 | 0.285272007 | 0.109169955 |
| ENSGALG00010001668 | 0.635424353 | 0.089695518 |
| ENSGALG00010001670 | 0.805296009 | 0.409494313 |
| ENSGALG00010001671 | 0.251051216 | 0.208832212 |
| ENSGALG00010001672 | 0.837539475 | 0.392119044 |
| ENSGALG00010001673 | 0.648023922 | 0.193727678 |
| ENSGALG00010001674 | 0.841272945 | 0.341116862 |
| ENSGALG00010001675 | 0.302191238 | 0.175836158 |
| ENSGALG00010001677 | 0.941041319 | 0.182213826 |
| ENSGALG00010001678 | 0.932075194 | 0.227871096 |
| ENSGALG00010001679 | 0.485498341 | 0.186576831 |
| ENSGALG00010001680 | 0.708369168 | 0.2761317   |
| ENSGALG00010001681 | 0.446890226 | 0.274959567 |
| ENSGALG00010001682 | 0.150765673 | 0.087775298 |
| ENSGALG00010001686 | 0.912578149 | 0.354163694 |
| ENSGALG00010001688 | 0.495218022 | 0.330308758 |
| ENSGALG00010001689 | 0.910508735 | 0.394436243 |
| ENSGALG00010001691 | 0.671928996 | 0.151950439 |
| ENSGALG00010001692 | 0.979615338 | 0.313388132 |
| ENSGALG00010001693 | 0.952768298 | 0.360028852 |
| ENSGALG00010001694 | 0.734375216 | 0.283745957 |
| ENSGALG00010001695 | 0.88867006  | 0.309414059 |
| ENSGALG00010001696 | 0.722939931 | 0.322783248 |
| ENSGALG00010001697 | 0.354771856 | 0.344581578 |
| ENSGALG00010001698 | 0.943465414 | 0.349919751 |
| ENSGALG00010001699 | 0.993535924 | 0.317787881 |
| ENSGALG00010001700 | 0.673997719 | 0.125152105 |
| ENSGALG00010001701 | 0.964644636 | 0.401155254 |
| ENSGALG00010001702 | 0.861956278 | 0.133756866 |
| ENSGALG00010001704 | 0.549089704 | 0.364964556 |
| ENSGALG00010001705 | 0.856256999 | 0.13039973  |
| ENSGALG00010001706 | 0.707221888 | 0.13986217  |
| ENSGALG00010001707 | 0.964718515 | 0.304769688 |
| ENSGALG00010001708 | 0.972037516 | 0.364517096 |

|                    |             |             |
|--------------------|-------------|-------------|
| ENSGALG00010001709 | 0.405797923 | 0.13200104  |
| ENSGALG00010001710 | 0.323348566 | 0.152618716 |
| ENSGALG00010001711 | 0.909743307 | 0.26401307  |
| ENSGALG00010001712 | 0.378005361 | 0.094833287 |
| ENSGALG00010001713 | 0.808420242 | 0.21748494  |
| ENSGALG00010001714 | 0.214067262 | 0.182518297 |
| ENSGALG00010001715 | 0.33593534  | 0.034995438 |
| ENSGALG00010001716 | 0.974845051 | 0.401855212 |
| ENSGALG00010001717 | 0.363526723 | 0.21641949  |
| ENSGALG00010001721 | 0.026180415 | 0.285752017 |
| ENSGALG00010001725 | 0.896404801 | 0.305936477 |
| ENSGALG00010001726 | 0.241229294 | 0.225366445 |
| ENSGALG00010001727 | 0.010813399 | 0.280237107 |
| ENSGALG00010001728 | 0.870943999 | 0.440839015 |
| ENSGALG00010001729 | 0.82124044  | 0.344783346 |
| ENSGALG00010001730 | 0.37615561  | 0.112727925 |
| ENSGALG00010001731 | 0.961785686 | 0.229114516 |
| ENSGALG00010001732 | 0.971071441 | 0.351708641 |
| ENSGALG00010001737 | 0.311656077 | 0.221682868 |
| ENSGALG00010001738 | 0.01352735  | 0.075448972 |
| ENSGALG00010001741 | 0.963582256 | 0.356998252 |
| ENSGALG00010001743 | 0.409436406 | 0.157934013 |
| ENSGALG00010001744 | 0.088450995 | 0.244414017 |
| ENSGALG00010001745 | 0.770875414 | 0.081221572 |
| ENSGALG00010001746 | 0.374556039 | 0.35122871  |
| ENSGALG00010001749 | 0.981221649 | 0.29927475  |
| ENSGALG00010001750 | 0.487891197 | 0.181703046 |
| ENSGALG00010001751 | 0.291720498 | 0.524744722 |
| ENSGALG00010001752 | 0.680094122 | 0.172491979 |
| ENSGALG00010001753 | 0.18307392  | 0.158560056 |
| ENSGALG00010001754 | 0.501120352 | 0.469491098 |
| ENSGALG00010001756 | 0.550202827 | 0.227020267 |
| ENSGALG00010001758 | 0.275935626 | 0.291669028 |
| ENSGALG00010001759 | 0.972237252 | 0.27605888  |
| ENSGALG00010001760 | 0.854979333 | 0.315243439 |
| ENSGALG00010001761 | 0.984237129 | 0.32799955  |
| ENSGALG00010001763 | 0.769133784 | 0.401167732 |
| ENSGALG00010001764 | 0.635288662 | 0.483721836 |
| ENSGALG00010001766 | 0.16589826  | 0.352067461 |
| ENSGALG00010001767 | 0.922869859 | 0.295352968 |
| ENSGALG00010001770 | 0.4312115   | 0.482861159 |
| ENSGALG00010001771 | 0.478884847 | 0.1712237   |
| ENSGALG00010001773 | 0.58584331  | 0.36400428  |
| ENSGALG00010001774 | 0.90801579  | 0.263089581 |
| ENSGALG00010001776 | 0.103343486 | 0.250529151 |
| ENSGALG00010001778 | 0.821416762 | 0.259999518 |
| ENSGALG00010001779 | 0.404737955 | 0.305913177 |
| ENSGALG00010001780 | 0.891664271 | 0.426914304 |
| ENSGALG00010001783 | 0.564502616 | 0.289504862 |
| ENSGALG00010001784 | 0.886486237 | 0.333825804 |
| ENSGALG00010001785 | 0.78822063  | 0.319292664 |
| ENSGALG00010001786 | 0.940612577 | 0.409160378 |
| ENSGALG00010001788 | 0.577839928 | 0.068787042 |
| ENSGALG00010001790 | 0.544042159 | 0.159165608 |
| ENSGALG00010001793 | 0.385138438 | 0.009820524 |
| ENSGALG00010001795 | 0.503202112 | 0.014344819 |

|                    |             |             |
|--------------------|-------------|-------------|
| ENSGALG00010001796 | 0.872331453 | 0.289622813 |
| ENSGALG00010001797 | 0.82389983  | 0.114835583 |
| ENSGALG00010001798 | 0.955149841 | 0.327488856 |
| ENSGALG00010001800 | 0.745877095 | 0.03402381  |
| ENSGALG00010001801 | 0.893646174 | 0.302276342 |
| ENSGALG00010001803 | 0.541415505 | 0.293197477 |
| ENSGALG00010001805 | 0.781475409 | 0.31255792  |
| ENSGALG00010001807 | 0.908742489 | 0.350500704 |
| ENSGALG00010001808 | 0.172683158 | 0.184448338 |
| ENSGALG00010001810 | 0.551973915 | 0.149221827 |
| ENSGALG00010001811 | 0.087945553 | 0.216678174 |
| ENSGALG00010001813 | 0.954711468 | 0.280990883 |
| ENSGALG00010001816 | 0.236644512 | 0.207965177 |
| ENSGALG00010001817 | 0.942321868 | 0.245376179 |
| ENSGALG00010001819 | 0.977462427 | 0.360767814 |
| ENSGALG00010001820 | 0.980082317 | 0.361287591 |
| ENSGALG00010001822 | 0.575462371 | 0.392747094 |
| ENSGALG00010001823 | 0.786144707 | 0.150797324 |
| ENSGALG00010001825 | 0.980921806 | 0.305017738 |
| ENSGALG00010001826 | 0.986686707 | 0.337345562 |
| ENSGALG00010001827 | 0.408991391 | 0.672076699 |
| ENSGALG00010001828 | 0.029558715 | 0.175619474 |
| ENSGALG00010001829 | 0.936881613 | 0.2689309   |
| ENSGALG00010001831 | 0.9659007   | 0.387049342 |
| ENSGALG00010001832 | 0.825871495 | 0.326009906 |
| ENSGALG00010001834 | 0.928915895 | 0.231797775 |
| ENSGALG00010001835 | 0.965812898 | 0.344837357 |
| ENSGALG00010001836 | 0.937403621 | 0.387642225 |
| ENSGALG00010001837 | 0.854152913 | 0.417501817 |
| ENSGALG00010001838 | 0.668381074 | 0.272484221 |
| ENSGALG00010001839 | 0.90167706  | 0.245486679 |
| ENSGALG00010001840 | 0.988388444 | 0.347292261 |
| ENSGALG00010001841 | 0.373495264 | 0.061911944 |
| ENSGALG00010001843 | 0.657803866 | 0.043446347 |
| ENSGALG00010001844 | 0.997502673 | 0.317290205 |
| ENSGALG00010001845 | 0.08717748  | 0.048138178 |
| ENSGALG00010001847 | 0.836220923 | 0.297835668 |
| ENSGALG00010001848 | 0.984842721 | 0.33762884  |
| ENSGALG00010001849 | 0.847502995 | 0.34513911  |
| ENSGALG00010001850 | 0.983403019 | 0.326427979 |
| ENSGALG00010001852 | 0.845528298 | 0.452423048 |
| ENSGALG00010001853 | 0.975342956 | 0.28807058  |
| ENSGALG00010001854 | 0.007468921 | 0.055443459 |
| ENSGALG00010001856 | 0.836956887 | 0.362685347 |
| ENSGALG00010001857 | 0.968045577 | 0.260525733 |
| ENSGALG00010001858 | 0.960473038 | 0.39879441  |
| ENSGALG00010001860 | 0.620160965 | 0.449254878 |
| ENSGALG00010001861 | 0.304038276 | 0.266354292 |
| ENSGALG00010001862 | 0.100071103 | 0.311755764 |
| ENSGALG00010001863 | 0.285272007 | 0.109169955 |
| ENSGALG00010001864 | 0.661088705 | 0.014476613 |
| ENSGALG00010001865 | 0.974707685 | 0.242396243 |
| ENSGALG00010001866 | 0.487863067 | 0.025362473 |
| ENSGALG00010001868 | 0.961852445 | 0.300861672 |
| ENSGALG00010001869 | 0.911395835 | 0.246146443 |
| ENSGALG00010001870 | 0.967441795 | 0.380176804 |

|                    |             |             |
|--------------------|-------------|-------------|
| ENSGALG00010001871 | 0.100221071 | 0.412892211 |
| ENSGALG00010001873 | 0.861763995 | 0.23517105  |
| ENSGALG00010001874 | 0.264239718 | 0.073427965 |
| ENSGALG00010001875 | 0.164245645 | 0.108932726 |
| ENSGALG00010001877 | 0.605460878 | 0.333927968 |
| ENSGALG00010001878 | 0.94486034  | 0.441580577 |
| ENSGALG00010001879 | 0.921923207 | 0.394595507 |
| ENSGALG00010001880 | 0.990681278 | 0.324144034 |
| ENSGALG00010001882 | 0.903959733 | 0.220689775 |
| ENSGALG00010001883 | 0.878064936 | 0.277692422 |
| ENSGALG00010001885 | 0.98458861  | 0.336543573 |
| ENSGALG00010001886 | 0.822447073 | 0.486037751 |
| ENSGALG00010001888 | 0.750800179 | 0.220743785 |
| ENSGALG00010001889 | 0.898150811 | 0.077434428 |
| ENSGALG00010001890 | 0.992707465 | 0.328531774 |
| ENSGALG00010001892 | 0.993166635 | 0.285330988 |
| ENSGALG00010001895 | 0.926931098 | 0.324491785 |
| ENSGALG00010001896 | 0.755778039 | 0.223682771 |
| ENSGALG00010001897 | 0.917448919 | 0.348090338 |
| ENSGALG00010001898 | 0.318961828 | 0.271158231 |
| ENSGALG00010001899 | 0.129676067 | 0.379278408 |
| ENSGALG00010001901 | 0.986940333 | 0.305065123 |
| ENSGALG00010001902 | 0.807440863 | 0.269679152 |
| ENSGALG00010001903 | 0.00850065  | 0.008840407 |
| ENSGALG00010001905 | 0.474453227 | 0.175126822 |
| ENSGALG00010001906 | 0.973321884 | 0.238608264 |
| ENSGALG00010001907 | 0.033649171 | 0.058721699 |
| ENSGALG00010001908 | 0.561309596 | 0.161144458 |
| ENSGALG00010001910 | 0.601743001 | 0.109459527 |
| ENSGALG00010001911 | 0.757177548 | 0.462132434 |
| ENSGALG00010001912 | 0.965539185 | 0.311766398 |
| ENSGALG00010001914 | 0.282061563 | 0.23673287  |
| ENSGALG00010001915 | 0.381917902 | 0.392874494 |
| ENSGALG00010001916 | 0.200570274 | 0.091667991 |
| ENSGALG00010001918 | 0.984103032 | 0.325585941 |
| ENSGALG00010001921 | 0.158695787 | 0.17776753  |
| ENSGALG00010001923 | 0.087051516 | 0.293845625 |
| ENSGALG00010001925 | 0.231437858 | 0.180950134 |
| ENSGALG00010001928 | 0.95913538  | 0.40318912  |
| ENSGALG00010001929 | 0.51789724  | 0.195712684 |
| ENSGALG00010001932 | 0.270451009 | 0.090541667 |
| ENSGALG00010001933 | 0.269161007 | 0.003152763 |
| ENSGALG00010001934 | 0.656286915 | 0.222562807 |
| ENSGALG00010001935 | 0.408724021 | 0.189326644 |
| ENSGALG00010001936 | 0.564772984 | 0.130483595 |
| ENSGALG00010001937 | 0.447022056 | 0.214365905 |
| ENSGALG00010001938 | 0.908835778 | 0.510353715 |
| ENSGALG00010001940 | 0.743566916 | 0.315618966 |
| ENSGALG00010001941 | 0.583501426 | 0.242446184 |
| ENSGALG00010001947 | 0.326544472 | 0.228845279 |
| ENSGALG00010001948 | 0.633787179 | 0.394036387 |
| ENSGALG00010001952 | 0.937218546 | 0.374932901 |
| ENSGALG00010001957 | 0.955927125 | 0.324326143 |
| ENSGALG00010001958 | 0.750575146 | 0.195324776 |
| ENSGALG00010001961 | 0.794714643 | 0.313849589 |
| ENSGALG00010001966 | 0.296387604 | 0.201163796 |



|                    |             |             |
|--------------------|-------------|-------------|
| ENSGALG00010001967 | 0.569846666 | 0.268256926 |
| ENSGALG00010001969 | 0.886698255 | 0.304745097 |
| ENSGALG00010001971 | 0.996073752 | 0.314944997 |
| ENSGALG00010001972 | 0.687468578 | 0.261006717 |
| ENSGALG00010001974 | 0.595074433 | 0.242627304 |
| ENSGALG00010001976 | 0.960203016 | 0.237115596 |
| ENSGALG00010001982 | 0.962599659 | 0.363708127 |
| ENSGALG00010001983 | 0.420589752 | 0.19582821  |
| ENSGALG00010001985 | 0.399453749 | 0.144668892 |
| ENSGALG00010001987 | 0.918058442 | 0.334574514 |
| ENSGALG00010001991 | 0.978315368 | 0.322462291 |
| ENSGALG00010001994 | 0.024265609 | 0.001469158 |
| ENSGALG00010001995 | 0.608952549 | 0.112868405 |
| ENSGALG00010001997 | 0.874045216 | 0.468522623 |
| ENSGALG00010001998 | 0.391612505 | 0.15490595  |
| ENSGALG00010001999 | 0.287998705 | 0.327203319 |
| ENSGALG00010002001 | 0.466434729 | 0.173009248 |
| ENSGALG00010002002 | 0.576113547 | 0.127580867 |
| ENSGALG00010002003 | 0.371720349 | 0.297047526 |
| ENSGALG00010002005 | 0.64813848  | 0.139257113 |
| ENSGALG00010002006 | 0.927659011 | 0.247504842 |
| ENSGALG00010002011 | 0.015799617 | 0.33126237  |
| ENSGALG00010002012 | 0.119609481 | 0.128738958 |
| ENSGALG00010002013 | 0.98891557  | 0.347238662 |
| ENSGALG00010002015 | 0.977479543 | 0.30286779  |
| ENSGALG00010002016 | 0.256828349 | 0.119064955 |
| ENSGALG00010002017 | 0.787248049 | 0.229353503 |
| ENSGALG00010002019 | 0.179605246 | 0.330783199 |
| ENSGALG00010002022 | 0.001482199 | 0.141923802 |
| ENSGALG00010002023 | 0.961856308 | 0.30679047  |
| ENSGALG00010002024 | 0.984007534 | 0.325094127 |
| ENSGALG00010002027 | 0.988449513 | 0.339751757 |
| ENSGALG00010002031 | 0.123809512 | 0.225781273 |
| ENSGALG00010002032 | 0.266137114 | 0.107784983 |
| ENSGALG00010002033 | 0.750300665 | 0.372604994 |
| ENSGALG00010002034 | 0.601758652 | 0.109944628 |
| ENSGALG00010002035 | 0.502118462 | 0.332717279 |
| ENSGALG00010002036 | 0.639658693 | 0.412252286 |
| ENSGALG00010002039 | 0.920364582 | 0.366939472 |
| ENSGALG00010002040 | 0.262922434 | 0.138601464 |
| ENSGALG00010002041 | 0.990963849 | 0.353009736 |
| ENSGALG00010002043 | 0.262922434 | 0.138601464 |
| ENSGALG00010002045 | 0.596787529 | 0.130584084 |
| ENSGALG00010002046 | 0.958424938 | 0.244257041 |
| ENSGALG00010002053 | 0.270451009 | 0.090541667 |
| ENSGALG00010002054 | 0.870869653 | 0.336132441 |
| ENSGALG00010002056 | 0.195381024 | 0.080851447 |
| ENSGALG00010002058 | 0.36047204  | 0.134977804 |
| ENSGALG00010002060 | 0.920184343 | 0.294891757 |
| ENSGALG00010002062 | 0.924010136 | 0.362654966 |
| ENSGALG00010002063 | 0.193734992 | 0.177459015 |
| ENSGALG00010002065 | 0.41048686  | 0.009984217 |
| ENSGALG00010002067 | 0.364871524 | 0.123582396 |
| ENSGALG00010002068 | 0.235630588 | 0.132393411 |
| ENSGALG00010002072 | 0.911476469 | 0.262402167 |
| ENSGALG00010002077 | 0.286555462 | 0.078819245 |

|                    |             |             |
|--------------------|-------------|-------------|
| ENSGALG00010002079 | 0.998279143 | 0.336234355 |
| ENSGALG00010002084 | 0.974199586 | 0.32731906  |
| ENSGALG00010002087 | 0.178616917 | 0.180857114 |
| ENSGALG00010002088 | 0.535201006 | 0.247188657 |
| ENSGALG00010002090 | 0.903262855 | 0.425614721 |
| ENSGALG00010002091 | 0.285272007 | 0.109169955 |
| ENSGALG00010002092 | 0.034019991 | 0.100937458 |
| ENSGALG00010002096 | 0.349930392 | 0.50024929  |
| ENSGALG00010002097 | 0.688904084 | 0.548530308 |
| ENSGALG00010002098 | 0.833964872 | 0.261780622 |
| ENSGALG00010002100 | 0.977459802 | 0.311983929 |
| ENSGALG00010002101 | 0.155022075 | 0.203417013 |
| ENSGALG00010002102 | 0.855267399 | 0.291276986 |
| ENSGALG00010002105 | 0.317817399 | 0.302086383 |
| ENSGALG00010002106 | 0.26027575  | 0.046300471 |
| ENSGALG00010002107 | 0.820836269 | 0.334211338 |
| ENSGALG00010002111 | 0.558566182 | 0.190569919 |
| ENSGALG00010002112 | 0.807907065 | 0.266517914 |
| ENSGALG00010002115 | 0.412926743 | 0.131655581 |
| ENSGALG00010002116 | 0.66841915  | 0.277631832 |
| ENSGALG00010002117 | 0.221294806 | 0.149665226 |
| ENSGALG00010002118 | 0.79492547  | 0.343593845 |
| ENSGALG00010002122 | 0.312470885 | 0.570353048 |
| ENSGALG00010002126 | 0.963133114 | 0.357270411 |
| ENSGALG00010002129 | 0.399426914 | 0.178230835 |
| ENSGALG00010002131 | 0.250946664 | 0.19344305  |
| ENSGALG00010002134 | 0.924202636 | 0.225355732 |
| ENSGALG00010002135 | 0.980372099 | 0.280412341 |
| ENSGALG00010002136 | 0.017490827 | 0.103523428 |
| ENSGALG00010002137 | 0.920415746 | 0.26491614  |
| ENSGALG00010002138 | 0.935809807 | 0.197887315 |
| ENSGALG00010002139 | 0.387818129 | 0.081671798 |
| ENSGALG00010002140 | 0.300082404 | 0.333976218 |
| ENSGALG00010002142 | 0.840976609 | 0.291194717 |
| ENSGALG00010002143 | 0.417426328 | 0.086497625 |
| ENSGALG00010002145 | 0.379083402 | 0.207745045 |
| ENSGALG00010002146 | 0.937506555 | 0.234066966 |
| ENSGALG00010002148 | 0.963240937 | 0.294170194 |
| ENSGALG00010002149 | 0.841892451 | 0.368264097 |
| ENSGALG00010002150 | 0.974137068 | 0.299355199 |
| ENSGALG00010002153 | 0.331971497 | 0.045379539 |
| ENSGALG00010002154 | 0.448057352 | 0.358463963 |
| ENSGALG00010002155 | 0.32196029  | 0.050029141 |
| ENSGALG00010002156 | 0.893453353 | 0.200582769 |
| ENSGALG00010002157 | 0.243306597 | 0.037543053 |
| ENSGALG00010002158 | 0.910665853 | 0.353970553 |
| ENSGALG00010002159 | 0.913825897 | 0.296802372 |
| ENSGALG00010002160 | 0.796113835 | 0.268415382 |
| ENSGALG00010002161 | 0.552718574 | 0.177327382 |
| ENSGALG00010002162 | 0.487268559 | 0.180261519 |
| ENSGALG00010002163 | 0.050617734 | 0.096533567 |
| ENSGALG00010002165 | 0.815355117 | 0.389309432 |
| ENSGALG00010002166 | 0.004293511 | 0.153198801 |
| ENSGALG00010002167 | 0.265558089 | 0.028821141 |
| ENSGALG00010002171 | 0.284475392 | 0.383854323 |
| ENSGALG00010002173 | 0.35061144  | 0.226205545 |

|                    |             |             |
|--------------------|-------------|-------------|
| ENSGALG00010002174 | 0.631184483 | 0.291887293 |
| ENSGALG00010002175 | 0.036009037 | 0.278514501 |
| ENSGALG00010002176 | 0.663505605 | 0.376624786 |
| ENSGALG00010002177 | 0.83957327  | 0.415685877 |
| ENSGALG00010002179 | 0.11121658  | 0.144637997 |
| ENSGALG00010002181 | 0.594785611 | 0.158473488 |
| ENSGALG00010002185 | 0.206080138 | 0.254112363 |
| ENSGALG00010002186 | 0.965078447 | 0.266865386 |
| ENSGALG00010002187 | 0.684292802 | 0.275619159 |
| ENSGALG00010002188 | 0.832477341 | 0.28742483  |
| ENSGALG00010002191 | 0.131862928 | 0.144483832 |
| ENSGALG00010002192 | 0.977970476 | 0.389163571 |
| ENSGALG00010002193 | 0.013536418 | 0.091863354 |
| ENSGALG00010002194 | 0.976054342 | 0.275593113 |
| ENSGALG00010002196 | 0.746921051 | 0.010823814 |
| ENSGALG00010002197 | 0.967678454 | 0.320388359 |
| ENSGALG00010002199 | 0.40785333  | 0.157127562 |
| ENSGALG00010002200 | 0.960697932 | 0.271426871 |
| ENSGALG00010002202 | 0.897395274 | 0.187043309 |
| ENSGALG00010002203 | 0.235630588 | 0.132393411 |
| ENSGALG00010002204 | 0.359249748 | 0.523045056 |
| ENSGALG00010002205 | 0.378848707 | 0.137590461 |
| ENSGALG00010002206 | 0.915008195 | 0.154977911 |
| ENSGALG00010002207 | 0.522750984 | 0.288998508 |
| ENSGALG00010002208 | 0.956191986 | 0.319042847 |
| ENSGALG00010002211 | 0.975853164 | 0.313823341 |
| ENSGALG00010002213 | 0.264239718 | 0.073427965 |
| ENSGALG00010002215 | 0.05248968  | 0.311555691 |
| ENSGALG00010002219 | 0.332441466 | 0.000632524 |
| ENSGALG00010002220 | 0.392749996 | 0.129686126 |
| ENSGALG00010002225 | 0.972774838 | 0.262065753 |
| ENSGALG00010002226 | 0.545906426 | 0.115022971 |
| ENSGALG00010002227 | 0.372048872 | 0.145150327 |
| ENSGALG00010002229 | 0.334462638 | 0.171008572 |
| ENSGALG00010002231 | 0.968389065 | 0.296951638 |
| ENSGALG00010002232 | 0.201512115 | 0.188537209 |
| ENSGALG00010002235 | 0.966381803 | 0.360506061 |
| ENSGALG00010002237 | 0.871457344 | 0.266855614 |
| ENSGALG00010002238 | 0.234648381 | 0.205315189 |
| ENSGALG00010002239 | 0.988688185 | 0.335082269 |
| ENSGALG00010002242 | 0.729204817 | 0.22567151  |
| ENSGALG00010002243 | 0.61833817  | 0.140594786 |
| ENSGALG00010002247 | 0.963281966 | 0.282022851 |
| ENSGALG00010002249 | 0.064441818 | 0.209223326 |
| ENSGALG00010002250 | 0.490643133 | 0.120773411 |
| ENSGALG00010002251 | 0.968472082 | 0.195980758 |
| ENSGALG00010002252 | 0.308758304 | 0.100827364 |
| ENSGALG00010002253 | 0.981863495 | 0.315641213 |
| ENSGALG00010002254 | 0.929203839 | 0.326197059 |
| ENSGALG00010002255 | 0.404167701 | 0.144831306 |
| ENSGALG00010002257 | 0.401639624 | 0.101384476 |
| ENSGALG00010002259 | 0.841979688 | 0.115649868 |
| ENSGALG00010002260 | 0.829235643 | 0.461410663 |
| ENSGALG00010002261 | 0.981291432 | 0.358477627 |
| ENSGALG00010002263 | 0.083875835 | 0.089201779 |
| ENSGALG00010002269 | 0.482041472 | 0.068104602 |

|                    |             |             |
|--------------------|-------------|-------------|
| ENSGALG00010002270 | 0.432089303 | 0.112386283 |
| ENSGALG00010002271 | 0.953948707 | 0.366179693 |
| ENSGALG00010002272 | 0.013536418 | 0.091863354 |
| ENSGALG00010002274 | 0.781782082 | 0.150063433 |
| ENSGALG00010002275 | 0.460756806 | 0.123465737 |
| ENSGALG00010002277 | 0.771558499 | 0.126067366 |
| ENSGALG00010002278 | 0.791631678 | 0.347553326 |
| ENSGALG00010002280 | 0.854528827 | 0.240573047 |
| ENSGALG00010002281 | 0.523785584 | 0.37428227  |
| ENSGALG00010002282 | 0.878326268 | 0.273846912 |
| ENSGALG00010002284 | 0.207029721 | 0.157390351 |
| ENSGALG00010002285 | 0.981283397 | 0.376850882 |
| ENSGALG00010002286 | 0.410453886 | 0.411345105 |
| ENSGALG00010002288 | 0.881235023 | 0.410091685 |
| ENSGALG00010002290 | 0.922039554 | 0.428214604 |
| ENSGALG00010002291 | 0.79817682  | 0.220025111 |
| ENSGALG00010002292 | 0.266137114 | 0.107784983 |
| ENSGALG00010002293 | 0.20322794  | 0.04483825  |
| ENSGALG00010002294 | 0.410372274 | 0.054570367 |
| ENSGALG00010002295 | 0.420623441 | 0.236251635 |
| ENSGALG00010002297 | 0.329906659 | 0.052658091 |
| ENSGALG00010002298 | 0.319246163 | 0.029179991 |
| ENSGALG00010002299 | 0.470913161 | 0.146489572 |
| ENSGALG00010002303 | 0.269007545 | 0.141697266 |
| ENSGALG00010002304 | 0.55470103  | 0.21617295  |
| ENSGALG00010002307 | 0.089145506 | 0.104599052 |
| ENSGALG00010002308 | 0.81350012  | 0.200696867 |
| ENSGALG00010002309 | 0.984130856 | 0.363286487 |
| ENSGALG00010002310 | 0.82405586  | 0.314913743 |
| ENSGALG00010002311 | 0.068507877 | 0.183989296 |
| ENSGALG00010002312 | 0.814999364 | 0.413627874 |
| ENSGALG00010002314 | 0.265558089 | 0.028821141 |
| ENSGALG00010002315 | 0.419325205 | 0.386495332 |
| ENSGALG00010002318 | 0.195642099 | 0.201239282 |
| ENSGALG00010002322 | 0.404293546 | 0.305645222 |
| ENSGALG00010002324 | 0.007420952 | 0.120965845 |
| ENSGALG00010002328 | 0.808165789 | 0.126141729 |
| ENSGALG00010002329 | 0.376641041 | 0.343763671 |
| ENSGALG00010002330 | 0.648195409 | 0.41241721  |
| ENSGALG00010002331 | 0.116533458 | 0.349735986 |
| ENSGALG00010002332 | 0.405979644 | 0.432394487 |
| ENSGALG00010002333 | 0.83870193  | 0.284339411 |
| ENSGALG00010002334 | 0.870389854 | 0.185179678 |
| ENSGALG00010002335 | 0.987730943 | 0.400027166 |
| ENSGALG00010002336 | 0.312883485 | 0.180249285 |
| ENSGALG00010002337 | 0.037470672 | 0.184159142 |
| ENSGALG00010002338 | 0.982019403 | 0.408089306 |
| ENSGALG00010002339 | 0.546813749 | 0.329813676 |
| ENSGALG00010002340 | 0.464885443 | 0.178568748 |
| ENSGALG00010002341 | 0.970848915 | 0.283811486 |
| ENSGALG00010002342 | 0.992994184 | 0.314984031 |
| ENSGALG00010002343 | 0.946602163 | 0.23496604  |
| ENSGALG00010002344 | 0.271701261 | 0.072417625 |
| ENSGALG00010002345 | 0.6568966   | 0.196937671 |
| ENSGALG00010002346 | 0.497430348 | 0.269146535 |
| ENSGALG00010002347 | 0.881412428 | 0.433580416 |

|                    |             |             |
|--------------------|-------------|-------------|
| ENSGALG00010002348 | 0.54918003  | 0.340428897 |
| ENSGALG00010002349 | 0.66265891  | 0.076203495 |
| ENSGALG00010002350 | 0.007673762 | 0.024982282 |
| ENSGALG00010002351 | 0.236432957 | 0.223877779 |
| ENSGALG00010002352 | 0.622179368 | 0.264594319 |
| ENSGALG00010002353 | 0.526467769 | 0.288638189 |
| ENSGALG00010002354 | 0.20150931  | 0.117569843 |
| ENSGALG00010002355 | 0.935521746 | 0.251158205 |
| ENSGALG00010002356 | 0.757756127 | 0.2999707   |
| ENSGALG00010002357 | 0.937962693 | 0.260327998 |
| ENSGALG00010002358 | 0.733257125 | 0.26569355  |
| ENSGALG00010002359 | 0.915087417 | 0.276591313 |
| ENSGALG00010002360 | 0.845872958 | 0.37995274  |
| ENSGALG00010002361 | 0.939857001 | 0.369748718 |
| ENSGALG00010002362 | 0.146806367 | 0.489290217 |
| ENSGALG00010002364 | 0.989998402 | 0.38272385  |
| ENSGALG00010002365 | 0.987267893 | 0.35276476  |
| ENSGALG00010002366 | 0.806419697 | 0.092386917 |
| ENSGALG00010002368 | 0.922752508 | 0.365251738 |
| ENSGALG00010002369 | 0.72116223  | 0.081001222 |
| ENSGALG00010002370 | 0.029378696 | 0.074475345 |
| ENSGALG00010002371 | 0.994751126 | 0.319619551 |
| ENSGALG00010002372 | 0.37567732  | 0.265265869 |
| ENSGALG00010002373 | 0.289500909 | 0.136137638 |
| ENSGALG00010002374 | 0.979462808 | 0.324138768 |
| ENSGALG00010002375 | 0.541434491 | 0.784661634 |
| ENSGALG00010002376 | 0.878989566 | 0.335994526 |
| ENSGALG00010002377 | 0.921964238 | 0.394114084 |
| ENSGALG00010002378 | 0.629554137 | 0.009240489 |
| ENSGALG00010002379 | 0.00111261  | 0.287462778 |
| ENSGALG00010002380 | 0.94048042  | 0.444354167 |
| ENSGALG00010002381 | 0.962015934 | 0.239305225 |
| ENSGALG00010002382 | 0.435769736 | 0.009700538 |
| ENSGALG00010002383 | 0.682525544 | 0.455637758 |
| ENSGALG00010002384 | 0.351344784 | 0.143255986 |
| ENSGALG00010002385 | 0.962191819 | 0.295832921 |
| ENSGALG00010002386 | 0.258099818 | 0.199697    |
| ENSGALG00010002387 | 0.849461369 | 0.082731173 |
| ENSGALG00010002388 | 0.903419374 | 0.157467723 |
| ENSGALG00010002389 | 0.139907236 | 0.0013802   |
| ENSGALG00010002391 | 0.852551265 | 0.351981951 |
| ENSGALG00010002392 | 0.950756384 | 0.409657786 |
| ENSGALG00010002393 | 0.986132545 | 0.3319394   |
| ENSGALG00010002395 | 0.984517438 | 0.329817898 |
| ENSGALG00010002396 | 0.101370942 | 0.065971534 |
| ENSGALG00010002397 | 0.556270843 | 0.259490072 |
| ENSGALG00010002398 | 0.075277146 | 0.41885664  |
| ENSGALG00010002399 | 0.279300361 | 0.104446866 |
| ENSGALG00010002400 | 0.327339808 | 0.258875108 |
| ENSGALG00010002401 | 0.873381245 | 0.134993275 |
| ENSGALG00010002402 | 0.165747177 | 0.147615287 |
| ENSGALG00010002403 | 0.817550119 | 0.138408616 |
| ENSGALG00010002404 | 0.927240254 | 0.231391258 |
| ENSGALG00010002405 | 0.818190503 | 0.431149568 |
| ENSGALG00010002406 | 0.330385536 | 0.265643889 |
| ENSGALG00010002407 | 0.109582889 | 0.331216082 |

|                    |             |             |
|--------------------|-------------|-------------|
| ENSGALG00010002408 | 0.399639503 | 0.273436609 |
| ENSGALG00010002409 | 0.858670336 | 0.348960999 |
| ENSGALG00010002410 | 0.87470675  | 0.405178391 |
| ENSGALG00010002411 | 0.544494716 | 0.016119427 |
| ENSGALG00010002413 | 0.939530492 | 0.241914034 |
| ENSGALG00010002414 | 0.347516663 | 0.024277913 |
| ENSGALG00010002416 | 0.966197547 | 0.380983443 |
| ENSGALG00010002417 | 0.268039933 | 0.265604527 |
| ENSGALG00010002418 | 0.553929708 | 0.045602183 |
| ENSGALG00010002419 | 0.94792226  | 0.386722065 |
| ENSGALG00010002420 | 0.271701261 | 0.072417625 |
| ENSGALG00010002421 | 0.377217408 | 0.077348101 |
| ENSGALG00010002422 | 0.673520653 | 0.258768313 |
| ENSGALG00010002423 | 0.26221985  | 0.169429033 |
| ENSGALG00010002424 | 0.944718644 | 0.32217825  |
| ENSGALG00010002425 | 0.975269595 | 0.376700932 |
| ENSGALG00010002426 | 0.048532643 | 0.007975711 |
| ENSGALG00010002427 | 0.568091387 | 0.301122608 |
| ENSGALG00010002428 | 0.800928272 | 0.341502302 |
| ENSGALG00010002429 | 0.562464518 | 0.203919215 |
| ENSGALG00010002430 | 0.984187021 | 0.303509453 |
| ENSGALG00010002431 | 0.894497211 | 0.20551621  |
| ENSGALG00010002432 | 0.379870409 | 0.007626282 |
| ENSGALG00010002433 | 0.854188547 | 0.276192734 |
| ENSGALG00010002434 | 0.977066946 | 0.295676463 |
| ENSGALG00010002435 | 0.993944509 | 0.340708021 |
| ENSGALG00010002436 | 0.22972462  | 0.267744745 |
| ENSGALG00010002437 | 0.273637011 | 0.154650996 |
| ENSGALG00010002438 | 0.569636624 | 0.091692577 |
| ENSGALG00010002439 | 0.849959777 | 0.198065964 |
| ENSGALG00010002440 | 0.951119588 | 0.308529672 |
| ENSGALG00010002441 | 0.244131471 | 0.249991568 |
| ENSGALG00010002442 | 0.296802117 | 0.049266998 |
| ENSGALG00010002443 | 0.746706235 | 0.185213419 |
| ENSGALG00010002444 | 0.726320069 | 0.078836282 |
| ENSGALG00010002445 | 0.955524188 | 0.372202695 |
| ENSGALG00010002446 | 0.638384901 | 0.001965816 |
| ENSGALG00010002447 | 0.765710835 | 0.012769636 |
| ENSGALG00010002448 | 0.346743652 | 0.121805224 |
| ENSGALG00010002449 | 0.87390924  | 0.174633544 |
| ENSGALG00010002450 | 0.001253957 | 0.226044501 |
| ENSGALG00010002451 | 0.211604673 | 0.150221027 |
| ENSGALG00010002453 | 0.441743725 | 0.521469948 |
| ENSGALG00010002454 | 0.86642296  | 0.409841965 |
| ENSGALG00010002455 | 0.796606791 | 0.141745318 |
| ENSGALG00010002456 | 0.388899421 | 0.120062276 |
| ENSGALG00010002457 | 0.093327267 | 0.035470014 |
| ENSGALG00010002458 | 0.986168127 | 0.288264235 |
| ENSGALG00010002459 | 0.513826869 | 0.146371947 |
| ENSGALG00010002460 | 0.990649136 | 0.336642969 |
| ENSGALG00010002461 | 0.967977958 | 0.328576842 |
| ENSGALG00010002462 | 0.804243719 | 0.169200784 |
| ENSGALG00010002463 | 0.519849624 | 0.088950182 |
| ENSGALG00010002464 | 0.525941386 | 0.092177103 |
| ENSGALG00010002465 | 0.971630941 | 0.344893196 |
| ENSGALG00010002466 | 0.971232383 | 0.282005213 |

|                    |             |             |
|--------------------|-------------|-------------|
| ENSGALG00010002467 | 0.826683508 | 0.163189772 |
| ENSGALG00010002468 | 0.109265555 | 0.056672294 |
| ENSGALG00010002470 | 0.761699184 | 0.312249899 |
| ENSGALG00010002471 | 0.127500065 | 0.038712491 |
| ENSGALG00010002472 | 0.980961522 | 0.305522222 |
| ENSGALG00010002473 | 0.321159034 | 0.382612349 |
| ENSGALG00010002474 | 0.926733333 | 0.300303624 |
| ENSGALG00010002475 | 0.746926439 | 0.074301467 |
| ENSGALG00010002476 | 0.396723331 | 0.068539048 |
| ENSGALG00010002478 | 0.215333569 | 0.131764311 |
| ENSGALG00010002481 | 0.243549737 | 0.139892922 |
| ENSGALG00010002482 | 0.360647091 | 0.259347684 |
| ENSGALG00010002483 | 0.886229716 | 0.305511434 |
| ENSGALG00010002484 | 0.924855759 | 0.40111544  |
| ENSGALG00010002485 | 0.944885358 | 0.389285791 |
| ENSGALG00010002487 | 0.812958172 | 0.103583696 |
| ENSGALG00010002491 | 0.301310019 | 0.334117489 |
| ENSGALG00010002492 | 0.901679399 | 0.306371713 |
| ENSGALG00010002493 | 0.587695198 | 0.121793753 |
| ENSGALG00010002494 | 0.013254443 | 0.189524565 |
| ENSGALG00010002495 | 0.373446581 | 0.117589412 |
| ENSGALG00010002496 | 0.505026024 | 0.219416157 |
| ENSGALG00010002497 | 0.452161949 | 0.056599887 |
| ENSGALG00010002498 | 0.264239718 | 0.073427965 |
| ENSGALG00010002500 | 0.837498197 | 0.397635092 |
| ENSGALG00010002501 | 0.941076251 | 0.233095693 |
| ENSGALG00010002503 | 0.525432077 | 0.328586149 |
| ENSGALG00010002504 | 0.947816851 | 0.272717015 |
| ENSGALG00010002507 | 0.514385928 | 0.068384281 |
| ENSGALG00010002511 | 0.507605255 | 0.000207829 |
| ENSGALG00010002512 | 0.954727106 | 0.28627579  |
| ENSGALG00010002513 | 0.987629156 | 0.385431264 |
| ENSGALG00010002518 | 0.817655668 | 0.416578256 |
| ENSGALG00010002520 | 0.7256483   | 0.102078649 |
| ENSGALG00010002522 | 0.943366769 | 0.394613358 |
| ENSGALG00010002523 | 0.983262658 | 0.348233078 |
| ENSGALG00010002525 | 0.623949504 | 0.305339076 |
| ENSGALG00010002526 | 0.976744457 | 0.331648369 |
| ENSGALG00010002527 | 0.906565876 | 0.331794818 |
| ENSGALG00010002528 | 0.910976106 | 0.301691782 |
| ENSGALG00010002529 | 0.438779362 | 0.196437292 |
| ENSGALG00010002530 | 0.610628981 | 0.303084537 |
| ENSGALG00010002531 | 0.382713001 | 0.71925729  |
| ENSGALG00010002532 | 0.292362493 | 0.105019933 |
| ENSGALG00010002533 | 0.402134739 | 0.158601814 |
| ENSGALG00010002535 | 0.216433634 | 0.680598293 |
| ENSGALG00010002536 | 0.785873165 | 0.213352519 |
| ENSGALG00010002537 | 0.290365752 | 0.580915876 |
| ENSGALG00010002539 | 0.82283447  | 0.225386718 |
| ENSGALG00010002540 | 0.586480106 | 0.2100934   |
| ENSGALG00010002541 | 0.843507467 | 0.144176543 |
| ENSGALG00010002543 | 0.982549855 | 0.343026867 |
| ENSGALG00010002544 | 0.271311783 | 0.10889103  |
| ENSGALG00010002546 | 0.96515111  | 0.316880546 |
| ENSGALG00010002547 | 0.761726917 | 0.037184173 |
| ENSGALG00010002550 | 0.409801916 | 0.308826204 |

|                    |             |             |
|--------------------|-------------|-------------|
| ENSGALG00010002551 | 0.559085956 | 0.500134161 |
| ENSGALG00010002553 | 0.607736483 | 0.516102329 |
| ENSGALG00010002554 | 0.978666747 | 0.376230245 |
| ENSGALG00010002556 | 0.883766133 | 0.36095683  |
| ENSGALG00010002557 | 0.4854601   | 0.302175003 |
| ENSGALG00010002559 | 0.471333085 | 0.16661648  |
| ENSGALG00010002561 | 0.810365224 | 0.249143162 |
| ENSGALG00010002563 | 0.713249995 | 0.125533509 |
| ENSGALG00010002565 | 0.952554929 | 0.220290927 |
| ENSGALG00010002566 | 0.864815577 | 0.185604576 |
| ENSGALG00010002567 | 0.24148808  | 0.516815743 |
| ENSGALG00010002569 | 0.053398513 | 0.653005504 |
| ENSGALG00010002570 | 0.92074244  | 0.227887537 |
| ENSGALG00010002571 | 0.745830978 | 0.211749186 |
| ENSGALG00010002572 | 0.591517896 | 0.522424853 |
| ENSGALG00010002573 | 0.816745632 | 0.142673975 |
| ENSGALG00010002575 | 0.785573964 | 0.311367318 |
| ENSGALG00010002576 | 0.348083767 | 0.433107477 |
| ENSGALG00010002577 | 0.134335152 | 0.013225701 |
| ENSGALG00010002578 | 0.426258376 | 0.053454122 |
| ENSGALG00010002579 | 0.622043971 | 0.195421409 |
| ENSGALG00010002580 | 0.052478779 | 0.171591946 |
| ENSGALG00010002581 | 0.06666648  | 0.306647492 |
| ENSGALG00010002582 | 0.99660158  | 0.34273536  |
| ENSGALG00010002584 | 0.687510332 | 0.437407259 |
| ENSGALG00010002585 | 0.593073102 | 0.287060952 |
| ENSGALG00010002586 | 0.775283986 | 0.294009529 |
| ENSGALG00010002587 | 0.842438936 | 0.08544142  |
| ENSGALG00010002588 | 0.864803051 | 0.253398894 |
| ENSGALG00010002589 | 0.348658701 | 0.351293902 |
| ENSGALG00010002590 | 0.834407264 | 0.045623602 |
| ENSGALG00010002591 | 0.770610577 | 0.117572362 |
| ENSGALG00010002592 | 0.308514388 | 0.237056647 |
| ENSGALG00010002595 | 0.264239718 | 0.073427965 |
| ENSGALG00010002596 | 0.370777081 | 0.136486549 |
| ENSGALG00010002597 | 0.761883842 | 0.226463848 |
| ENSGALG00010002598 | 0.849081232 | 0.325485809 |
| ENSGALG00010002599 | 0.132526512 | 0.141072167 |
| ENSGALG00010002600 | 0.786218138 | 0.29346218  |
| ENSGALG00010002601 | 0.987507296 | 0.339380013 |
| ENSGALG00010002603 | 0.592872182 | 0.000555661 |
| ENSGALG00010002604 | 0.468156893 | 0.024688016 |
| ENSGALG00010002605 | 0.897861522 | 0.142743458 |
| ENSGALG00010002606 | 0.591244658 | 0.256270192 |
| ENSGALG00010002608 | 0.168760106 | 0.013448821 |
| ENSGALG00010002609 | 0.938421906 | 0.261421442 |
| ENSGALG00010002611 | 0.252875981 | 0.081393995 |
| ENSGALG00010002612 | 0.994398855 | 0.316285402 |
| ENSGALG00010002613 | 0.832557548 | 0.42056262  |
| ENSGALG00010002614 | 0.226604935 | 0.047815008 |
| ENSGALG00010002616 | 0.600821256 | 0.129690324 |
| ENSGALG00010002617 | 0.834801906 | 0.378750325 |
| ENSGALG00010002618 | 0.766394885 | 0.189504672 |
| ENSGALG00010002619 | 0.832297565 | 0.19961566  |
| ENSGALG00010002621 | 0.832799435 | 0.310171368 |
| ENSGALG00010002622 | 0.860134182 | 0.411581648 |



|                    |             |             |
|--------------------|-------------|-------------|
| ENSGALG00010002623 | 0.988168784 | 0.34738914  |
| ENSGALG00010002624 | 0.798170236 | 0.127850966 |
| ENSGALG00010002625 | 0.867022457 | 0.407691782 |
| ENSGALG00010002626 | 0.021573164 | 0.027978749 |
| ENSGALG00010002627 | 0.969006675 | 0.343020729 |
| ENSGALG00010002628 | 0.961988424 | 0.365979351 |
| ENSGALG00010002629 | 0.976540787 | 0.383142424 |
| ENSGALG00010002630 | 0.200570274 | 0.091667991 |
| ENSGALG00010002631 | 0.396365709 | 0.157137627 |
| ENSGALG00010002632 | 0.975789749 | 0.300951433 |
| ENSGALG00010002633 | 0.914201219 | 0.391265466 |
| ENSGALG00010002634 | 0.94412954  | 0.40166593  |
| ENSGALG00010002635 | 0.584985124 | 0.125300598 |
| ENSGALG00010002636 | 0.784076848 | 0.286908227 |
| ENSGALG00010002637 | 0.128456369 | 0.294809833 |
| ENSGALG00010002638 | 0.09567427  | 0.090373318 |
| ENSGALG00010002640 | 0.208550923 | 0.676301294 |
| ENSGALG00010002641 | 0.367503232 | 0.093310735 |
| ENSGALG00010002643 | 0.38913966  | 0.311292364 |
| ENSGALG00010002644 | 0.734858781 | 0.049428576 |
| ENSGALG00010002646 | 0.542147947 | 0.023183849 |
| ENSGALG00010002647 | 0.981785971 | 0.272291201 |
| ENSGALG00010002649 | 0.662011727 | 0.25769865  |
| ENSGALG00010002650 | 0.1051832   | 0.08542629  |
| ENSGALG00010002651 | 0.058197908 | 0.203222062 |
| ENSGALG00010002652 | 0.251163168 | 0.06689371  |
| ENSGALG00010002653 | 0.940120982 | 0.115733884 |
| ENSGALG00010002654 | 0.27428151  | 0.347212613 |
| ENSGALG00010002655 | 0.948305061 | 0.338631972 |
| ENSGALG00010002656 | 0.210161188 | 0.078991138 |
| ENSGALG00010002657 | 0.235630588 | 0.132393411 |
| ENSGALG00010002658 | 0.97805512  | 0.333123565 |
| ENSGALG00010002659 | 0.40135901  | 0.158038591 |
| ENSGALG00010002661 | 0.892018324 | 0.401479067 |
| ENSGALG00010002662 | 0.188404905 | 0.00721247  |
| ENSGALG00010002663 | 0.158426212 | 0.147582862 |
| ENSGALG00010002664 | 0.908910103 | 0.151799814 |
| ENSGALG00010002666 | 0.844113614 | 0.262859143 |
| ENSGALG00010002667 | 0.995221774 | 0.335999421 |
| ENSGALG00010002668 | 0.018485516 | 0.005043303 |
| ENSGALG00010002669 | 0.899584903 | 0.246510372 |
| ENSGALG00010002671 | 0.917528577 | 0.16190009  |
| ENSGALG00010002673 | 0.948304103 | 0.432005085 |
| ENSGALG00010002676 | 0.503222906 | 0.103611778 |
| ENSGALG00010002677 | 0.515294759 | 0.296742286 |
| ENSGALG00010002678 | 0.984389628 | 0.321496412 |
| ENSGALG00010002679 | 0.711348852 | 0.238315284 |
| ENSGALG00010002680 | 0.689010494 | 0.046739699 |
| ENSGALG00010002681 | 0.645875683 | 0.181812107 |
| ENSGALG00010002682 | 0.935281818 | 0.284039443 |
| ENSGALG00010002685 | 0.895649539 | 0.304949716 |
| ENSGALG00010002688 | 0.385889159 | 0.436525088 |
| ENSGALG00010002689 | 0.909515111 | 0.387601969 |
| ENSGALG00010002693 | 0.927987726 | 0.367371735 |
| ENSGALG00010002694 | 0.089670069 | 0.175722502 |
| ENSGALG00010002695 | 0.693152292 | 0.192497857 |

|                    |             |             |
|--------------------|-------------|-------------|
| ENSGALG00010002700 | 0.907690254 | 0.401399344 |
| ENSGALG00010002701 | 0.013536418 | 0.091863354 |
| ENSGALG00010002702 | 0.514763036 | 0.546902705 |
| ENSGALG00010002703 | 0.97936662  | 0.284018576 |
| ENSGALG00010002704 | 0.988398549 | 0.371435111 |
| ENSGALG00010002705 | 0.969325867 | 0.398920039 |
| ENSGALG00010002706 | 0.978999387 | 0.301042744 |
| ENSGALG00010002707 | 0.512479956 | 0.002186191 |
| ENSGALG00010002708 | 0.698499931 | 0.563935604 |
| ENSGALG00010002709 | 0.616577629 | 0.266600516 |
| ENSGALG00010002711 | 0.665471944 | 0.209041478 |
| ENSGALG00010002712 | 0.941779316 | 0.424316691 |
| ENSGALG00010002713 | 0.980798879 | 0.29252487  |
| ENSGALG00010002714 | 0.942342294 | 0.277452427 |
| ENSGALG00010002716 | 0.917246188 | 0.245395192 |
| ENSGALG00010002718 | 0.806663257 | 0.25075505  |
| ENSGALG00010002722 | 0.942800182 | 0.318929477 |
| ENSGALG00010002723 | 0.081960713 | 0.054317503 |
| ENSGALG00010002724 | 0.265558089 | 0.028821141 |
| ENSGALG00010002725 | 0.961884516 | 0.315741108 |
| ENSGALG00010002727 | 0.405710703 | 0.256827649 |
| ENSGALG00010002728 | 0.963633881 | 0.266322551 |
| ENSGALG00010002729 | 0.050115024 | 0.155140157 |
| ENSGALG00010002730 | 0.961373189 | 0.224244191 |
| ENSGALG00010002732 | 0.061812619 | 0.144281832 |
| ENSGALG00010002733 | 0.664116795 | 0.064144743 |
| ENSGALG00010002737 | 0.384831073 | 0.205747021 |
| ENSGALG00010002738 | 0.553196658 | 0.142295553 |
| ENSGALG00010002739 | 0.284227058 | 0.103920777 |
| ENSGALG00010002740 | 0.597098814 | 0.038813846 |
| ENSGALG00010002741 | 0.188503634 | 0.036622052 |
| ENSGALG00010002742 | 0.079922276 | 0.124331003 |
| ENSGALG00010002743 | 0.321362185 | 0.385493124 |
| ENSGALG00010002746 | 0.097253698 | 0.391639402 |
| ENSGALG00010002747 | 0.218604483 | 0.59786529  |
| ENSGALG00010002750 | 0.817627166 | 0.130611257 |
| ENSGALG00010002752 | 0.972027803 | 0.294590017 |
| ENSGALG00010002753 | 0.79032313  | 0.624994439 |
| ENSGALG00010002754 | 0.423548628 | 0.274867707 |
| ENSGALG00010002756 | 0.979643725 | 0.333733693 |
| ENSGALG00010002758 | 0.489921907 | 0.173810043 |
| ENSGALG00010002760 | 0.908423175 | 0.156626554 |
| ENSGALG00010002762 | 0.646585239 | 0.354940791 |
| ENSGALG00010002763 | 0.985776839 | 0.319294611 |
| ENSGALG00010002765 | 0.987072451 | 0.365734253 |
| ENSGALG00010002766 | 0.914860215 | 0.2082568   |
| ENSGALG00010002767 | 0.958757267 | 0.399259527 |
| ENSGALG00010002768 | 0.787171397 | 0.538873536 |
| ENSGALG00010002774 | 0.990232382 | 0.354145301 |
| ENSGALG00010002775 | 0.129381518 | 0.340333232 |
| ENSGALG00010002777 | 0.226728902 | 0.299204319 |
| ENSGALG00010002778 | 0.015410241 | 0.296645041 |
| ENSGALG00010002779 | 0.974641964 | 0.380419443 |
| ENSGALG00010002781 | 0.935081051 | 0.293169562 |
| ENSGALG00010002782 | 0.905563743 | 0.28963167  |
| ENSGALG00010002783 | 0.547459666 | 0.147704667 |

|                    |             |             |
|--------------------|-------------|-------------|
| ENSGALG00010002784 | 0.817501527 | 0.309279627 |
| ENSGALG00010002785 | 0.445272576 | 0.129016816 |
| ENSGALG00010002786 | 0.497040156 | 0.153304647 |
| ENSGALG00010002787 | 0.808403104 | 0.383330073 |
| ENSGALG00010002788 | 0.989858915 | 0.313439297 |
| ENSGALG00010002789 | 0.536497008 | 0.270657586 |
| ENSGALG00010002790 | 0.717602907 | 0.039521565 |
| ENSGALG00010002792 | 0.924073034 | 0.337488594 |
| ENSGALG00010002795 | 0.813272739 | 0.382047568 |
| ENSGALG00010002796 | 0.64519392  | 0.342000698 |
| ENSGALG00010002798 | 0.738267709 | 0.11789362  |
| ENSGALG00010002800 | 0.672318269 | 0.371935094 |
| ENSGALG00010002801 | 0.123399186 | 0.153791139 |
| ENSGALG00010002803 | 0.160453813 | 0.049889016 |
| ENSGALG00010002805 | 0.781338966 | 0.259011695 |
| ENSGALG00010002807 | 0.468137186 | 0.074174055 |
| ENSGALG00010002808 | 0.679381855 | 0.141389924 |
| ENSGALG00010002809 | 0.651000185 | 0.177137896 |
| ENSGALG00010002810 | 0.273136127 | 0.096156459 |
| ENSGALG00010002812 | 0.077726789 | 0.139500592 |
| ENSGALG00010002814 | 0.807851342 | 0.471808017 |
| ENSGALG00010002816 | 0.3740819   | 0.203837355 |
| ENSGALG00010002817 | 0.977707071 | 0.302488857 |
| ENSGALG00010002819 | 0.637887274 | 0.096111047 |
| ENSGALG00010002821 | 0.948606912 | 0.333173773 |
| ENSGALG00010002822 | 0.559695398 | 0.225424885 |
| ENSGALG00010002825 | 0.955981058 | 0.428515922 |
| ENSGALG00010002827 | 0.802380691 | 0.238740324 |
| ENSGALG00010002830 | 0.737181229 | 0.237131313 |
| ENSGALG00010002832 | 0.089586703 | 0.079373167 |
| ENSGALG00010002833 | 0.532342495 | 0.19563974  |
| ENSGALG00010002834 | 0.617521292 | 0.118097216 |
| ENSGALG00010002835 | 0.974440928 | 0.303915591 |
| ENSGALG00010002837 | 0.887372354 | 0.245444565 |
| ENSGALG00010002838 | 0.966231797 | 0.363958387 |
| ENSGALG00010002840 | 0.921029481 | 0.2903661   |
| ENSGALG00010002841 | 0.034342762 | 0.247942561 |
| ENSGALG00010002842 | 0.368847025 | 0.001815083 |
| ENSGALG00010002844 | 0.18653258  | 0.177497954 |
| ENSGALG00010002846 | 0.067693333 | 0.482957797 |
| ENSGALG00010002847 | 0.018301635 | 0.519548151 |
| ENSGALG00010002848 | 0.963487809 | 0.327363036 |
| ENSGALG00010002849 | 0.215564187 | 0.055310278 |
| ENSGALG00010002850 | 0.484546415 | 0.13932145  |
| ENSGALG00010002852 | 0.363332073 | 0.116301156 |
| ENSGALG00010002853 | 0.299914809 | 0.159203077 |
| ENSGALG00010002855 | 0.934951684 | 0.313402512 |
| ENSGALG00010002856 | 0.583360324 | 0.010464357 |
| ENSGALG00010002857 | 0.907740721 | 0.121127844 |
| ENSGALG00010002858 | 0.090929485 | 0.127903745 |
| ENSGALG00010002860 | 0.909438875 | 0.382931244 |
| ENSGALG00010002862 | 0.034784375 | 0.127082974 |
| ENSGALG00010002863 | 0.634105514 | 0.067200761 |
| ENSGALG00010002864 | 0.543976329 | 0.101285266 |
| ENSGALG00010002865 | 0.319320077 | 0.024051854 |
| ENSGALG00010002866 | 0.949012625 | 0.342950128 |

|                    |             |             |
|--------------------|-------------|-------------|
| ENSGALG00010002867 | 0.336495107 | 0.02005805  |
| ENSGALG00010002868 | 0.154749196 | 0.053544849 |
| ENSGALG00010002870 | 0.988771347 | 0.372066371 |
| ENSGALG00010002871 | 0.972456741 | 0.281995985 |
| ENSGALG00010002872 | 0.02545792  | 0.169929005 |
| ENSGALG00010002874 | 0.321350164 | 0.307712971 |
| ENSGALG00010002875 | 0.599752179 | 0.216695548 |
| ENSGALG00010002876 | 0.399453749 | 0.144668892 |
| ENSGALG00010002878 | 0.990041938 | 0.34967244  |
| ENSGALG00010002879 | 0.08290626  | 0.315697545 |
| ENSGALG00010002880 | 0.713284886 | 0.276050439 |
| ENSGALG00010002881 | 0.984528091 | 0.333212714 |
| ENSGALG00010002882 | 0.328403153 | 0.064477768 |
| ENSGALG00010002883 | 0.865969641 | 0.20661609  |
| ENSGALG00010002884 | 0.944603563 | 0.313006779 |
| ENSGALG00010002885 | 0.776917659 | 0.289278976 |
| ENSGALG00010002886 | 0.962354179 | 0.331749342 |
| ENSGALG00010002888 | 0.872640908 | 0.387452838 |
| ENSGALG00010002891 | 0.488583769 | 0.130802663 |
| ENSGALG00010002894 | 0.780387628 | 0.097965825 |
| ENSGALG00010002895 | 0.541729153 | 0.26832461  |
| ENSGALG00010002896 | 0.299137823 | 0.17686552  |
| ENSGALG00010002897 | 0.931414189 | 0.421330955 |
| ENSGALG00010002898 | 0.459182356 | 0.057010776 |
| ENSGALG00010002899 | 0.54500619  | 0.237306784 |
| ENSGALG00010002900 | 0.215989685 | 0.133491664 |
| ENSGALG00010002902 | 0.417686966 | 0.030069739 |
| ENSGALG00010002903 | 0.374329203 | 0.223226042 |
| ENSGALG00010002904 | 0.867695087 | 0.307694231 |
| ENSGALG00010002906 | 0.535734581 | 0.256996225 |
| ENSGALG00010002907 | 0.036463635 | 0.400420927 |
| ENSGALG00010002908 | 0.951212916 | 0.322436714 |
| ENSGALG00010002909 | 0.867748891 | 0.284006757 |
| ENSGALG00010002910 | 0.007866985 | 0.178290013 |
| ENSGALG00010002911 | 0.707555847 | 0.029984673 |
| ENSGALG00010002912 | 0.609874666 | 0.305357225 |
| ENSGALG00010002913 | 0.9147753   | 0.287018165 |
| ENSGALG00010002914 | 0.961857327 | 0.303227608 |
| ENSGALG00010002915 | 0.561986621 | 0.201759229 |
| ENSGALG00010002916 | 0.937706168 | 0.294043772 |
| ENSGALG00010002917 | 0.873729623 | 0.274242787 |
| ENSGALG00010002918 | 0.964797923 | 0.249936301 |
| ENSGALG00010002919 | 0.921404978 | 0.23887909  |
| ENSGALG00010002920 | 0.713222425 | 0.199940403 |
| ENSGALG00010002921 | 0.942949372 | 0.441491969 |
| ENSGALG00010002922 | 0.977456033 | 0.293173964 |
| ENSGALG00010002923 | 0.757976084 | 0.366250395 |
| ENSGALG00010002924 | 0.534017986 | 0.220747753 |
| ENSGALG00010002925 | 0.959037204 | 0.421181984 |
| ENSGALG00010002926 | 0.254111924 | 0.543691091 |
| ENSGALG00010002927 | 0.302352116 | 0.144221977 |
| ENSGALG00010002928 | 0.990082963 | 0.332064354 |
| ENSGALG00010002929 | 0.782079651 | 0.264437072 |
| ENSGALG00010002930 | 0.094420733 | 0.114438224 |
| ENSGALG00010002931 | 0.400778541 | 0.133797302 |
| ENSGALG00010002934 | 0.264239718 | 0.073427965 |

|                    |             |             |
|--------------------|-------------|-------------|
| ENSGALG00010002935 | 0.753183599 | 0.250138541 |
| ENSGALG00010002937 | 0.832117103 | 0.118128938 |
| ENSGALG00010002939 | 0.319804591 | 0.225079114 |
| ENSGALG00010002940 | 0.898236788 | 0.370087183 |
| ENSGALG00010002941 | 0.052836869 | 0.101827534 |
| ENSGALG00010002942 | 0.321208885 | 0.180627958 |
| ENSGALG00010002943 | 0.953350271 | 0.269412889 |
| ENSGALG00010002946 | 0.949813977 | 0.31152286  |
| ENSGALG00010002947 | 0.159309019 | 0.102716807 |
| ENSGALG00010002949 | 0.0093646   | 0.159193652 |
| ENSGALG00010002950 | 0.819412691 | 0.123162726 |
| ENSGALG00010002951 | 0.350516363 | 0.140397923 |
| ENSGALG00010002952 | 0.671851489 | 0.007396482 |
| ENSGALG00010002953 | 0.996900958 | 0.340224508 |
| ENSGALG00010002954 | 0.545711454 | 0.129888083 |
| ENSGALG00010002955 | 0.936569118 | 0.255610602 |
| ENSGALG00010002956 | 0.596206285 | 0.315116623 |
| ENSGALG00010002957 | 0.71589222  | 0.112283395 |
| ENSGALG00010002958 | 0.729192722 | 0.516375274 |
| ENSGALG00010002960 | 0.358360697 | 0.034853537 |
| ENSGALG00010002962 | 0.895310695 | 0.170926509 |
| ENSGALG00010002963 | 0.21177891  | 0.172575124 |
| ENSGALG00010002964 | 0.484974795 | 0.209787014 |
| ENSGALG00010002965 | 0.967378968 | 0.398331504 |
| ENSGALG00010002966 | 0.451442752 | 0.192821405 |
| ENSGALG00010002967 | 0.745841062 | 0.087621869 |
| ENSGALG00010002968 | 0.399665645 | 0.210283168 |
| ENSGALG00010002969 | 0.724204835 | 0.243191962 |
| ENSGALG00010002970 | 0.255071857 | 0.134385033 |
| ENSGALG00010002972 | 0.860730098 | 0.22872842  |
| ENSGALG00010002978 | 0.92335593  | 0.305091371 |
| ENSGALG00010002979 | 0.185245082 | 0.005210771 |
| ENSGALG00010002981 | 0.160561999 | 0.124937733 |
| ENSGALG00010002982 | 0.864825664 | 0.259042923 |
| ENSGALG00010002983 | 0.945615056 | 0.250106254 |
| ENSGALG00010002984 | 0.532832538 | 0.603240541 |
| ENSGALG00010002985 | 0.323600332 | 0.046971225 |
| ENSGALG00010002986 | 0.26745999  | 0.014614436 |
| ENSGALG00010002987 | 0.598501561 | 0.054000852 |
| ENSGALG00010002988 | 0.037762284 | 0.090313054 |
| ENSGALG00010002991 | 0.456794173 | 0.004444862 |
| ENSGALG00010002992 | 0.922965896 | 0.167925537 |
| ENSGALG00010002994 | 0.792162307 | 0.340634752 |
| ENSGALG00010002995 | 0.891087512 | 0.159067386 |
| ENSGALG00010002998 | 0.537793187 | 0.161957436 |
| ENSGALG00010002999 | 0.941766916 | 0.226596194 |
| ENSGALG00010003000 | 0.38718504  | 0.101838932 |
| ENSGALG00010003001 | 0.242149378 | 0.155084306 |
| ENSGALG00010003002 | 0.991133936 | 0.373243097 |
| ENSGALG00010003004 | 0.288049102 | 0.27865616  |
| ENSGALG00010003006 | 0.975831192 | 0.377226411 |
| ENSGALG00010003007 | 0.069815925 | 0.44175828  |
| ENSGALG00010003009 | 0.943620939 | 0.179341028 |
| ENSGALG00010003011 | 0.37552597  | 0.101692059 |
| ENSGALG00010003017 | 0.813954693 | 0.222560812 |
| ENSGALG00010003019 | 0.412897535 | 0.161739506 |

|                    |             |             |
|--------------------|-------------|-------------|
| ENSGALG00010003022 | 0.183416587 | 0.000803411 |
| ENSGALG00010003023 | 0.110231669 | 0.044134076 |
| ENSGALG00010003024 | 0.983960408 | 0.308732372 |
| ENSGALG00010003025 | 0.989741908 | 0.317412066 |
| ENSGALG00010003026 | 0.50022725  | 0.538831074 |
| ENSGALG00010003027 | 0.961367841 | 0.202644343 |
| ENSGALG00010003030 | 0.937048066 | 0.371432484 |
| ENSGALG00010003032 | 0.271701261 | 0.072417625 |
| ENSGALG00010003033 | 0.813832316 | 0.595639535 |
| ENSGALG00010003034 | 0.191738216 | 0.124332771 |
| ENSGALG00010003035 | 0.921086254 | 0.291902831 |
| ENSGALG00010003038 | 0.219386918 | 0.079388121 |
| ENSGALG00010003039 | 0.303566744 | 0.121227958 |
| ENSGALG00010003041 | 0.691381674 | 0.153691098 |
| ENSGALG00010003042 | 0.688538247 | 0.022173363 |
| ENSGALG00010003043 | 0.009429422 | 0.134618735 |
| ENSGALG00010003046 | 0.504215335 | 0.238231603 |
| ENSGALG00010003047 | 0.720528183 | 0.116255236 |
| ENSGALG00010003048 | 0.682490442 | 0.054721849 |
| ENSGALG00010003050 | 0.285272007 | 0.109169955 |
| ENSGALG00010003051 | 0.57153765  | 0.230500456 |
| ENSGALG00010003052 | 0.815654755 | 0.204954565 |
| ENSGALG00010003053 | 0.101700264 | 0.526058573 |
| ENSGALG00010003055 | 0.099618978 | 0.16833127  |
| ENSGALG00010003056 | 0.18041281  | 0.185292443 |
| ENSGALG00010003057 | 0.974545804 | 0.34135965  |
| ENSGALG00010003058 | 0.676282879 | 0.072104425 |
| ENSGALG00010003060 | 0.372757682 | 0.112441993 |
| ENSGALG00010003061 | 0.72534336  | 0.267283627 |
| ENSGALG00010003062 | 0.266137114 | 0.107784983 |
| ENSGALG00010003063 | 0.990080096 | 0.322621179 |
| ENSGALG00010003064 | 0.932020919 | 0.249173441 |
| ENSGALG00010003065 | 0.586577347 | 0.171538282 |
| ENSGALG00010003066 | 0.933131159 | 0.347543741 |
| ENSGALG00010003068 | 0.847771351 | 0.312947041 |
| ENSGALG00010003072 | 0.960972546 | 0.379418149 |
| ENSGALG00010003074 | 0.96483777  | 0.359845559 |
| ENSGALG00010003076 | 0.780930904 | 0.154271074 |
| ENSGALG00010003077 | 0.817815656 | 0.237338784 |
| ENSGALG00010003081 | 0.900450899 | 0.417253874 |
| ENSGALG00010003085 | 0.219191757 | 0.127418001 |
| ENSGALG00010003086 | 0.767182415 | 0.542373845 |
| ENSGALG00010003087 | 0.912045536 | 0.304668672 |
| ENSGALG00010003088 | 0.270451009 | 0.090541667 |
| ENSGALG00010003090 | 0.755446653 | 0.231492813 |
| ENSGALG00010003092 | 0.689563715 | 0.075413306 |
| ENSGALG00010003094 | 0.471665946 | 0.176475399 |
| ENSGALG00010003095 | 0.380790704 | 0.180335707 |
| ENSGALG00010003096 | 0.676111699 | 0.174305163 |
| ENSGALG00010003097 | 0.951481504 | 0.366024207 |
| ENSGALG00010003098 | 0.264239718 | 0.073427965 |
| ENSGALG00010003099 | 0.661315985 | 0.179947302 |
| ENSGALG00010003101 | 0.906775458 | 0.39687163  |
| ENSGALG00010003103 | 0.952992579 | 0.245502991 |
| ENSGALG00010003106 | 0.349255737 | 0.188021623 |
| ENSGALG00010003107 | 0.952353317 | 0.328629512 |

|                    |             |             |
|--------------------|-------------|-------------|
| ENSGALG00010003108 | 0.7805579   | 0.365261529 |
| ENSGALG00010003109 | 0.913006122 | 0.277664833 |
| ENSGALG00010003110 | 0.489750186 | 0.263946287 |
| ENSGALG00010003112 | 0.10155689  | 0.50610192  |
| ENSGALG00010003113 | 0.865000985 | 0.201608268 |
| ENSGALG00010003114 | 0.800912961 | 0.305090895 |
| ENSGALG00010003115 | 0.77160143  | 0.435012841 |
| ENSGALG00010003116 | 0.020861923 | 0.205362832 |
| ENSGALG00010003117 | 0.749331414 | 0.167521098 |
| ENSGALG00010003118 | 0.434455961 | 0.132085964 |
| ENSGALG00010003119 | 0.511408405 | 0.012979867 |
| ENSGALG00010003120 | 0.547247472 | 0.165556652 |
| ENSGALG00010003121 | 0.728974195 | 0.031258108 |
| ENSGALG00010003123 | 0.85554152  | 0.465113482 |
| ENSGALG00010003125 | 0.923319886 | 0.274722881 |
| ENSGALG00010003126 | 0.490923073 | 0.051478983 |
| ENSGALG00010003127 | 0.365045337 | 0.128150973 |
| ENSGALG00010003129 | 0.215173257 | 0.178900514 |
| ENSGALG00010003131 | 0.873993448 | 0.379844842 |
| ENSGALG00010003132 | 0.241134268 | 0.06465488  |
| ENSGALG00010003133 | 0.88983497  | 0.335762871 |
| ENSGALG00010003135 | 0.265558089 | 0.028821141 |
| ENSGALG00010003136 | 0.316258174 | 0.031049574 |
| ENSGALG00010003137 | 0.187514554 | 0.108479243 |
| ENSGALG00010003138 | 0.006224473 | 0.058042069 |
| ENSGALG00010003143 | 0.046413968 | 0.122175326 |
| ENSGALG00010003149 | 0.747415456 | 0.023654901 |
| ENSGALG00010003151 | 0.266137114 | 0.107784983 |
| ENSGALG00010003152 | 0.636062063 | 0.156426084 |
| ENSGALG00010003154 | 0.97547725  | 0.284058693 |
| ENSGALG00010003155 | 0.777949766 | 0.36334837  |
| ENSGALG00010003156 | 0.545913933 | 0.06323652  |
| ENSGALG00010003157 | 0.085533546 | 0.570832887 |
| ENSGALG00010003158 | 0.907973109 | 0.249789549 |
| ENSGALG00010003159 | 0.737387895 | 0.498559729 |
| ENSGALG00010003160 | 0.967125728 | 0.429513891 |
| ENSGALG00010003162 | 0.863118987 | 0.449258859 |
| ENSGALG00010003163 | 0.208550923 | 0.676301294 |
| ENSGALG00010003164 | 0.993088402 | 0.318836368 |
| ENSGALG00010003165 | 0.923705558 | 0.346973918 |
| ENSGALG00010003166 | 0.978616624 | 0.351780888 |
| ENSGALG00010003167 | 0.037255754 | 0.308963048 |
| ENSGALG00010003168 | 0.97569587  | 0.362390606 |
| ENSGALG00010003169 | 0.957341758 | 0.244315185 |
| ENSGALG00010003170 | 0.9935769   | 0.352003003 |
| ENSGALG00010003171 | 0.91697749  | 0.251240507 |
| ENSGALG00010003174 | 0.861355018 | 0.386942891 |
| ENSGALG00010003176 | 0.640322856 | 0.30207015  |
| ENSGALG00010003177 | 0.640215088 | 0.389449192 |
| ENSGALG00010003178 | 0.106650467 | 0.0179704   |
| ENSGALG00010003179 | 0.266137114 | 0.107784983 |
| ENSGALG00010003180 | 0.086603746 | 0.007818119 |
| ENSGALG00010003182 | 0.208711821 | 0.162017834 |
| ENSGALG00010003183 | 0.990440602 | 0.277214332 |
| ENSGALG00010003184 | 0.779254915 | 0.300873577 |
| ENSGALG00010003186 | 0.295532074 | 0.393206655 |

|                    |             |             |
|--------------------|-------------|-------------|
| ENSGALG00010003187 | 0.918674657 | 0.311547716 |
| ENSGALG00010003188 | 0.329744371 | 0.371370966 |
| ENSGALG00010003189 | 0.625370326 | 0.072954359 |
| ENSGALG00010003190 | 0.691174322 | 0.229633288 |
| ENSGALG00010003191 | 0.481659976 | 0.058084051 |
| ENSGALG00010003192 | 0.926310782 | 0.230371501 |
| ENSGALG00010003193 | 0.909146878 | 0.325098423 |
| ENSGALG00010003195 | 0.938550513 | 0.396098473 |
| ENSGALG00010003197 | 0.351308294 | 0.32074392  |
| ENSGALG00010003198 | 0.407585146 | 0.214208593 |
| ENSGALG00010003199 | 0.100912843 | 0.096197224 |
| ENSGALG00010003201 | 0.948193452 | 0.309002621 |
| ENSGALG00010003202 | 0.954735225 | 0.319530713 |
| ENSGALG00010003204 | 0.904232232 | 0.394148731 |
| ENSGALG00010003205 | 0.956721201 | 0.354657318 |
| ENSGALG00010003206 | 0.996779326 | 0.33513556  |
| ENSGALG00010003207 | 0.211482089 | 0.284909679 |
| ENSGALG00010003208 | 0.441756036 | 0.067921577 |
| ENSGALG00010003210 | 0.967543608 | 0.307940798 |
| ENSGALG00010003211 | 0.351196368 | 0.200359655 |
| ENSGALG00010003212 | 0.858522707 | 0.122304598 |
| ENSGALG00010003214 | 0.951121673 | 0.275677421 |
| ENSGALG00010003215 | 0.083169178 | 0.101477029 |
| ENSGALG00010003217 | 0.723269845 | 0.43280934  |
| ENSGALG00010003218 | 0.986736667 | 0.264253779 |
| ENSGALG00010003219 | 0.371352104 | 0.142693329 |
| ENSGALG00010003220 | 0.960592322 | 0.376491187 |
| ENSGALG00010003222 | 0.858514907 | 0.094675802 |
| ENSGALG00010003223 | 0.951964032 | 0.306792046 |
| ENSGALG00010003225 | 0.955572748 | 0.268416834 |
| ENSGALG00010003226 | 0.378529261 | 0.203754877 |
| ENSGALG00010003227 | 0.779604253 | 0.022854952 |
| ENSGALG00010003228 | 0.388919998 | 0.28043621  |
| ENSGALG00010003229 | 0.905181014 | 0.355437018 |
| ENSGALG00010003230 | 0.535583716 | 0.241999674 |
| ENSGALG00010003231 | 0.77202336  | 0.300389658 |
| ENSGALG00010003234 | 0.539557773 | 0.044261676 |
| ENSGALG00010003237 | 0.834154027 | 0.289944839 |
| ENSGALG00010003238 | 0.529678578 | 0.216292576 |
| ENSGALG00010003239 | 0.89506619  | 0.272042447 |
| ENSGALG00010003240 | 0.90368163  | 0.347748439 |
| ENSGALG00010003241 | 0.608592208 | 0.092638622 |
| ENSGALG00010003242 | 0.860571815 | 0.486502047 |
| ENSGALG00010003243 | 0.943521832 | 0.314453042 |
| ENSGALG00010003245 | 0.422096609 | 0.146671079 |
| ENSGALG00010003246 | 0.66345725  | 0.175709534 |
| ENSGALG00010003247 | 0.729456255 | 0.287735768 |
| ENSGALG00010003248 | 0.965505788 | 0.295513128 |
| ENSGALG00010003249 | 0.134903132 | 0.266293164 |
| ENSGALG00010003250 | 0.635798482 | 0.167682344 |
| ENSGALG00010003251 | 0.930619498 | 0.349340272 |
| ENSGALG00010003252 | 0.09088815  | 0.213622299 |
| ENSGALG00010003253 | 0.783877527 | 0.418191224 |
| ENSGALG00010003254 | 0.517575552 | 0.102288255 |
| ENSGALG00010003255 | 0.940824884 | 0.375258765 |
| ENSGALG00010003259 | 0.861804702 | 0.19253104  |



|                    |             |             |
|--------------------|-------------|-------------|
| ENSGALG00010003260 | 0.745703627 | 0.043894129 |
| ENSGALG00010003261 | 0.851141409 | 0.300300292 |
| ENSGALG00010003262 | 0.452004334 | 0.318131111 |
| ENSGALG00010003264 | 0.018022442 | 0.059184271 |
| ENSGALG00010003266 | 0.208550923 | 0.676301294 |
| ENSGALG00010003268 | 0.144281563 | 0.451596598 |
| ENSGALG00010003269 | 0.17090271  | 0.105936578 |
| ENSGALG00010003271 | 0.899297913 | 0.291269664 |
| ENSGALG00010003272 | 0.407989348 | 0.226340472 |
| ENSGALG00010003273 | 0.951067143 | 0.385954433 |
| ENSGALG00010003274 | 0.413555737 | 0.082037797 |
| ENSGALG00010003275 | 0.825045118 | 0.341005756 |
| ENSGALG00010003276 | 0.877871796 | 0.33285196  |
| ENSGALG00010003278 | 0.988797014 | 0.339081359 |
| ENSGALG00010003279 | 0.928969476 | 0.386660928 |
| ENSGALG00010003280 | 0.93259041  | 0.216102722 |
| ENSGALG00010003283 | 0.28441977  | 0.17808526  |
| ENSGALG00010003287 | 0.088975161 | 0.146877788 |
| ENSGALG00010003288 | 0.184512425 | 0.164683615 |
| ENSGALG00010003289 | 0.879225924 | 0.365397017 |
| ENSGALG00010003290 | 0.726501539 | 0.240442693 |
| ENSGALG00010003291 | 0.625052083 | 0.345113977 |
| ENSGALG00010003292 | 0.991586612 | 0.328544888 |
| ENSGALG00010003295 | 0.92267673  | 0.273614234 |
| ENSGALG00010003296 | 0.398908642 | 0.182257139 |
| ENSGALG00010003297 | 0.265481862 | 0.322207991 |
| ENSGALG00010003298 | 0.55108881  | 0.524673942 |
| ENSGALG00010003299 | 0.992049793 | 0.324825389 |
| ENSGALG00010003300 | 0.976806815 | 0.327583062 |
| ENSGALG00010003302 | 0.710524716 | 0.386123802 |
| ENSGALG00010003303 | 0.114550871 | 0.411449492 |
| ENSGALG00010003304 | 0.267959468 | 0.18114852  |
| ENSGALG00010003305 | 0.7706991   | 0.266550858 |
| ENSGALG00010003306 | 0.44601038  | 0.147757387 |
| ENSGALG00010003307 | 0.939943216 | 0.415976004 |
| ENSGALG00010003308 | 0.928996765 | 0.389153541 |
| ENSGALG00010003309 | 0.40289019  | 0.168989184 |
| ENSGALG00010003310 | 0.116964672 | 0.301144361 |
| ENSGALG00010003312 | 0.619369934 | 0.464396294 |
| ENSGALG00010003315 | 0.341344272 | 0.335570742 |
| ENSGALG00010003317 | 0.900717649 | 0.2723442   |
| ENSGALG00010003319 | 0.014423969 | 0.094604939 |
| ENSGALG00010003320 | 0.189240572 | 0.04996112  |
| ENSGALG00010003321 | 0.530572456 | 0.079071089 |
| ENSGALG00010003322 | 0.927113283 | 0.286709003 |
| ENSGALG00010003323 | 0.74873922  | 0.117733026 |
| ENSGALG00010003325 | 0.333291256 | 0.229057711 |
| ENSGALG00010003326 | 0.262922434 | 0.138601464 |
| ENSGALG00010003330 | 0.967186807 | 0.392194328 |
| ENSGALG00010003331 | 0.9581695   | 0.37832599  |
| ENSGALG00010003339 | 0.299741029 | 0.074474613 |
| ENSGALG00010003342 | 0.555518849 | 0.233941357 |
| ENSGALG00010003343 | 0.64373379  | 0.198888235 |
| ENSGALG00010003344 | 0.560978829 | 0.242248637 |
| ENSGALG00010003345 | 0.90743012  | 0.334058611 |
| ENSGALG00010003347 | 0.620793401 | 0.13696321  |

|                    |             |             |
|--------------------|-------------|-------------|
| ENSGALG00010003348 | 0.801453869 | 0.084057909 |
| ENSGALG00010003350 | 0.835666955 | 0.317206634 |
| ENSGALG00010003352 | 0.931579292 | 0.328480555 |
| ENSGALG00010003353 | 0.498442246 | 0.209516228 |
| ENSGALG00010003355 | 0.384865276 | 0.180497163 |
| ENSGALG00010003358 | 0.866124314 | 0.392408015 |
| ENSGALG00010003363 | 0.248210599 | 0.171476859 |
| ENSGALG00010003364 | 0.622918014 | 0.150976809 |
| ENSGALG00010003366 | 0.395752072 | 0.195088037 |
| ENSGALG00010003367 | 0.364661545 | 0.023442498 |
| ENSGALG00010003368 | 0.679893291 | 0.327883078 |
| ENSGALG00010003369 | 0.73486278  | 0.176490025 |
| ENSGALG00010003370 | 0.485030426 | 0.2000668   |
| ENSGALG00010003371 | 0.222929393 | 0.121601676 |
| ENSGALG00010003372 | 0.108149065 | 0.085747997 |
| ENSGALG00010003373 | 0.498400664 | 0.50680211  |
| ENSGALG00010003374 | 0.583259982 | 0.585376227 |
| ENSGALG00010003375 | 0.895998636 | 0.327739174 |
| ENSGALG00010003378 | 0.291530067 | 0.097635261 |
| ENSGALG00010003379 | 0.077669352 | 0.09831719  |
| ENSGALG00010003382 | 0.95165418  | 0.225206141 |
| ENSGALG00010003383 | 0.915095327 | 0.369716856 |
| ENSGALG00010003384 | 0.162255913 | 0.050717563 |
| ENSGALG00010003386 | 0.298505865 | 0.422939515 |
| ENSGALG00010003388 | 0.731703062 | 0.433402021 |
| ENSGALG00010003389 | 0.355837172 | 0.200776487 |
| ENSGALG00010003391 | 0.386299037 | 0.252195982 |
| ENSGALG00010003392 | 0.357358991 | 0.136196478 |
| ENSGALG00010003393 | 0.870511781 | 0.056146624 |
| ENSGALG00010003394 | 0.978619318 | 0.265392973 |
| ENSGALG00010003397 | 0.568771776 | 0.282422625 |
| ENSGALG00010003400 | 0.984612528 | 0.31267959  |
| ENSGALG00010003402 | 0.569177905 | 0.260291683 |
| ENSGALG00010003403 | 0.869640651 | 0.246512396 |
| ENSGALG00010003404 | 0.284225216 | 0.103866786 |
| ENSGALG00010003405 | 0.271522808 | 0.294558867 |
| ENSGALG00010003406 | 0.971467796 | 0.398709394 |
| ENSGALG00010003407 | 0.218042719 | 0.172896263 |
| ENSGALG00010003408 | 0.026966462 | 0.158284821 |
| ENSGALG00010003412 | 0.901750372 | 0.229371015 |
| ENSGALG00010003413 | 0.565562602 | 0.199452658 |
| ENSGALG00010003415 | 0.280762285 | 0.221260328 |
| ENSGALG00010003416 | 0.277566769 | 0.107857127 |
| ENSGALG00010003419 | 0.179259662 | 0.209057242 |
| ENSGALG00010003421 | 0.264239718 | 0.073427965 |
| ENSGALG00010003422 | 0.386050996 | 0.14466628  |
| ENSGALG00010003423 | 0.282976025 | 0.145658897 |
| ENSGALG00010003428 | 0.595406142 | 0.197447668 |
| ENSGALG00010003429 | 0.345957381 | 0.377989906 |
| ENSGALG00010003431 | 0.684365232 | 0.05876826  |
| ENSGALG00010003432 | 0.935106485 | 0.15690481  |
| ENSGALG00010003434 | 0.243326925 | 0.091719824 |
| ENSGALG00010003437 | 0.666786482 | 0.072034928 |
| ENSGALG00010003438 | 0.433619983 | 0.397964641 |
| ENSGALG00010003439 | 0.979751919 | 0.390219881 |
| ENSGALG00010003441 | 0.743633063 | 0.300548019 |

|                    |             |             |
|--------------------|-------------|-------------|
| ENSGALG00010003442 | 0.161824623 | 0.050157963 |
| ENSGALG00010003444 | 0.567820428 | 0.173537088 |
| ENSGALG00010003445 | 0.75078083  | 0.221899468 |
| ENSGALG00010003446 | 0.435556311 | 0.320315436 |
| ENSGALG00010003447 | 0.895715995 | 0.278352729 |
| ENSGALG00010003448 | 0.973007341 | 0.337147778 |
| ENSGALG00010003449 | 0.77221778  | 0.140201459 |
| ENSGALG00010003451 | 0.884230452 | 0.273144268 |
| ENSGALG00010003452 | 0.669829352 | 0.02350625  |
| ENSGALG00010003454 | 0.921512683 | 0.253925153 |
| ENSGALG00010003455 | 0.877570749 | 0.370238298 |
| ENSGALG00010003456 | 0.968249193 | 0.26905128  |
| ENSGALG00010003457 | 0.340035978 | 0.184426891 |
| ENSGALG00010003458 | 0.258128488 | 0.262877821 |
| ENSGALG00010003459 | 0.530374864 | 0.12556435  |
| ENSGALG00010003461 | 0.882311852 | 0.330385353 |
| ENSGALG00010003462 | 0.526680875 | 0.329544002 |
| ENSGALG00010003463 | 0.982686196 | 0.304429578 |
| ENSGALG00010003464 | 0.612438115 | 0.091226236 |
| ENSGALG00010003466 | 0.643705295 | 0.065322629 |
| ENSGALG00010003468 | 0.095284118 | 0.469054078 |
| ENSGALG00010003469 | 0.035158038 | 0.119871525 |
| ENSGALG00010003470 | 0.980133249 | 0.281862488 |
| ENSGALG00010003471 | 0.612651951 | 0.328358215 |
| ENSGALG00010003472 | 0.906749147 | 0.260175874 |
| ENSGALG00010003473 | 0.938662212 | 0.1653475   |
| ENSGALG00010003474 | 0.63341263  | 0.242974946 |
| ENSGALG00010003475 | 0.398518281 | 0.225017969 |
| ENSGALG00010003476 | 0.349184898 | 0.351999142 |
| ENSGALG00010003477 | 0.410090651 | 0.015209216 |
| ENSGALG00010003478 | 0.989054802 | 0.315843295 |
| ENSGALG00010003479 | 0.191718042 | 0.209764603 |
| ENSGALG00010003481 | 0.42029357  | 0.05696234  |
| ENSGALG00010003482 | 0.414089516 | 0.075029542 |
| ENSGALG00010003483 | 0.227513041 | 0.26806072  |
| ENSGALG00010003484 | 0.3637525   | 0.159288563 |
| ENSGALG00010003485 | 0.840067072 | 0.413811957 |
| ENSGALG00010003486 | 0.271701261 | 0.072417625 |
| ENSGALG00010003487 | 0.308758304 | 0.100827364 |
| ENSGALG00010003489 | 0.70946041  | 0.5603584   |
| ENSGALG00010003493 | 0.943278967 | 0.342946143 |
| ENSGALG00010003494 | 0.271701261 | 0.072417625 |
| ENSGALG00010003495 | 0.562927339 | 0.083208267 |
| ENSGALG00010003496 | 0.366667574 | 0.096374266 |
| ENSGALG00010003498 | 0.545077606 | 0.000787856 |
| ENSGALG00010003499 | 0.845903973 | 0.289650688 |
| ENSGALG00010003500 | 0.474087893 | 0.045382483 |
| ENSGALG00010003503 | 0.480347077 | 0.208770509 |
| ENSGALG00010003505 | 0.767492577 | 0.103815419 |
| ENSGALG00010003506 | 0.724055013 | 0.072856124 |
| ENSGALG00010003507 | 0.890913526 | 0.302434554 |
| ENSGALG00010003509 | 0.792208591 | 0.575786037 |
| ENSGALG00010003511 | 0.772697729 | 0.035620265 |
| ENSGALG00010003512 | 0.856535228 | 0.367339157 |
| ENSGALG00010003513 | 0.416448651 | 0.410231292 |
| ENSGALG00010003515 | 0.553818657 | 0.306975281 |

|                    |             |             |
|--------------------|-------------|-------------|
| ENSGALG00010003516 | 0.677344975 | 0.297625833 |
| ENSGALG00010003517 | 0.866134698 | 0.184801696 |
| ENSGALG00010003518 | 0.967693306 | 0.334376198 |
| ENSGALG00010003519 | 0.54623158  | 0.193385731 |
| ENSGALG00010003520 | 0.476448648 | 0.301148952 |
| ENSGALG00010003522 | 0.905514678 | 0.392048707 |
| ENSGALG00010003523 | 0.990113085 | 0.300859823 |
| ENSGALG00010003525 | 0.607408374 | 0.239024614 |
| ENSGALG00010003528 | 0.069237868 | 0.091618427 |
| ENSGALG00010003531 | 0.030464363 | 0.054912662 |
| ENSGALG00010003535 | 0.442790485 | 0.317590288 |
| ENSGALG00010003539 | 0.725594986 | 0.271940912 |
| ENSGALG00010003541 | 0.540698392 | 0.068927106 |
| ENSGALG00010003542 | 0.495183892 | 0.066100648 |
| ENSGALG00010003543 | 0.9337097   | 0.328157923 |
| ENSGALG00010003547 | 0.601195446 | 0.297188712 |
| ENSGALG00010003550 | 0.836547624 | 0.161741682 |
| ENSGALG00010003551 | 0.474173002 | 0.19716725  |
| ENSGALG00010003552 | 0.044378794 | 0.339771304 |
| ENSGALG00010003555 | 0.308301889 | 0.170345784 |
| ENSGALG00010003556 | 0.539889122 | 0.103003819 |
| ENSGALG00010003558 | 0.985262493 | 0.338918116 |
| ENSGALG00010003559 | 0.009812001 | 0.5166245   |
| ENSGALG00010003560 | 0.76727397  | 0.26541017  |
| ENSGALG00010003564 | 0.289526293 | 0.199376796 |
| ENSGALG00010003567 | 0.03285381  | 0.446229691 |
| ENSGALG00010003569 | 0.235630588 | 0.132393411 |
| ENSGALG00010003571 | 0.885703583 | 0.263787864 |
| ENSGALG00010003573 | 0.336296695 | 0.157126423 |
| ENSGALG00010003577 | 0.395556858 | 0.102965232 |
| ENSGALG00010003581 | 0.053679082 | 0.152566612 |
| ENSGALG00010003582 | 0.991907943 | 0.285945047 |
| ENSGALG00010003583 | 0.86778449  | 0.456869931 |
| ENSGALG00010003585 | 0.643075543 | 0.232657338 |
| ENSGALG00010003586 | 0.187514554 | 0.108479243 |
| ENSGALG00010003589 | 0.883523569 | 0.411295598 |
| ENSGALG00010003591 | 0.587353234 | 0.226044568 |
| ENSGALG00010003595 | 0.117694755 | 0.383805242 |
| ENSGALG00010003596 | 0.908052265 | 0.44227001  |
| ENSGALG00010003597 | 0.58239358  | 0.240887491 |
| ENSGALG00010003600 | 0.315496541 | 0.220943394 |
| ENSGALG00010003601 | 0.404216238 | 0.144864446 |
| ENSGALG00010003603 | 0.381415582 | 0.158761082 |
| ENSGALG00010003604 | 0.334308133 | 0.197241689 |
| ENSGALG00010003606 | 0.689838987 | 0.096135982 |
| ENSGALG00010003610 | 0.496123135 | 0.059822433 |
| ENSGALG00010003611 | 0.075427953 | 0.252942273 |
| ENSGALG00010003615 | 0.373811017 | 0.102306018 |
| ENSGALG00010003616 | 0.844209099 | 0.191912409 |
| ENSGALG00010003617 | 0.82877473  | 0.428538338 |
| ENSGALG00010003618 | 0.849325621 | 0.236493937 |
| ENSGALG00010003619 | 0.99263052  | 0.372167721 |
| ENSGALG00010003627 | 0.418853559 | 0.255119119 |
| ENSGALG00010003629 | 0.662322138 | 0.093784319 |
| ENSGALG00010003631 | 0.285272007 | 0.109169955 |
| ENSGALG00010003632 | 0.472893374 | 0.124519532 |

|                    |             |             |
|--------------------|-------------|-------------|
| ENSGALG00010003633 | 0.874628978 | 0.049126022 |
| ENSGALG00010003634 | 0.961751717 | 0.454254215 |
| ENSGALG00010003639 | 0.421908167 | 0.090398445 |
| ENSGALG00010003641 | 0.265338374 | 0.113300876 |
| ENSGALG00010003642 | 0.794658173 | 0.012865267 |
| ENSGALG00010003646 | 0.345622816 | 0.144937494 |
| ENSGALG00010003647 | 0.663877396 | 0.284968529 |
| ENSGALG00010003652 | 0.832309419 | 0.29497811  |
| ENSGALG00010003656 | 0.955212678 | 0.160723665 |
| ENSGALG00010003659 | 0.467248351 | 0.003156925 |
| ENSGALG00010003660 | 0.601717212 | 0.323463603 |
| ENSGALG00010003662 | 0.305732779 | 0.28673228  |
| ENSGALG00010003663 | 0.936007033 | 0.105639193 |
| ENSGALG00010003664 | 0.325327998 | 0.037399662 |
| ENSGALG00010003665 | 0.970020923 | 0.262880879 |
| ENSGALG00010003666 | 0.984071952 | 0.376305979 |
| ENSGALG00010003668 | 0.745910226 | 0.212745565 |
| ENSGALG00010003669 | 0.333095414 | 0.134815547 |
| ENSGALG00010003670 | 0.203991683 | 0.058221925 |
| ENSGALG00010003671 | 0.546775682 | 0.073560151 |
| ENSGALG00010003674 | 0.031609767 | 0.078395419 |
| ENSGALG00010003676 | 0.980343157 | 0.349226762 |
| ENSGALG00010003677 | 0.264239718 | 0.073427965 |
| ENSGALG00010003678 | 0.337896669 | 0.259230612 |
| ENSGALG00010003679 | 0.109342752 | 0.277812353 |
| ENSGALG00010003680 | 0.928092902 | 0.32832635  |
| ENSGALG00010003681 | 0.802117468 | 0.288164114 |
| ENSGALG00010003682 | 0.397516991 | 0.125566479 |
| ENSGALG00010003683 | 0.613259095 | 0.20316246  |
| ENSGALG00010003684 | 0.216433634 | 0.680598293 |
| ENSGALG00010003686 | 0.1806966   | 0.412338801 |
| ENSGALG00010003688 | 0.058767    | 0.066578089 |
| ENSGALG00010003689 | 0.364871524 | 0.123582396 |
| ENSGALG00010003691 | 0.403879276 | 0.057889159 |
| ENSGALG00010003692 | 0.050334666 | 0.261114476 |
| ENSGALG00010003693 | 0.151745883 | 0.013042855 |
| ENSGALG00010003695 | 0.963794281 | 0.314590462 |
| ENSGALG00010003698 | 0.740711035 | 0.327199718 |
| ENSGALG00010003700 | 0.534871678 | 0.341380531 |
| ENSGALG00010003701 | 0.845611439 | 0.254967113 |
| ENSGALG00010003702 | 0.112003557 | 0.251178953 |
| ENSGALG00010003703 | 0.590175    | 0.335121021 |
| ENSGALG00010003704 | 0.938494263 | 0.421116966 |
| ENSGALG00010003705 | 0.940155994 | 0.371214651 |
| ENSGALG00010003706 | 0.623359778 | 0.17818241  |
| ENSGALG00010003707 | 0.482768793 | 0.331455444 |
| ENSGALG00010003712 | 0.800238416 | 0.337330986 |
| ENSGALG00010003713 | 0.957916368 | 0.418772429 |
| ENSGALG00010003714 | 0.449308097 | 0.005700852 |
| ENSGALG00010003715 | 0.513720473 | 0.212256414 |
| ENSGALG00010003716 | 0.118666793 | 0.432641873 |
| ENSGALG00010003717 | 0.930211006 | 0.288941534 |
| ENSGALG00010003718 | 0.720805487 | 0.323692607 |
| ENSGALG00010003719 | 0.057573501 | 0.14967922  |
| ENSGALG00010003720 | 0.180551543 | 0.226519768 |
| ENSGALG00010003721 | 0.091660648 | 0.263774691 |

|                    |             |             |
|--------------------|-------------|-------------|
| ENSGALG00010003722 | 0.41016831  | 0.221865089 |
| ENSGALG00010003723 | 0.661457835 | 0.272298077 |
| ENSGALG00010003724 | 0.904703366 | 0.308172809 |
| ENSGALG00010003725 | 0.606644321 | 0.004445315 |
| ENSGALG00010003726 | 0.989556861 | 0.333102143 |
| ENSGALG00010003727 | 0.93218123  | 0.232380256 |
| ENSGALG00010003728 | 0.635167172 | 0.286355746 |
| ENSGALG00010003729 | 0.767558412 | 0.25193485  |
| ENSGALG00010003730 | 0.517678123 | 0.1475315   |
| ENSGALG00010003731 | 0.055330196 | 0.271475439 |
| ENSGALG00010003732 | 0.543769497 | 0.24197464  |
| ENSGALG00010003733 | 0.221289906 | 0.258940391 |
| ENSGALG00010003734 | 0.917206458 | 0.154695552 |
| ENSGALG00010003736 | 0.377046878 | 0.298393455 |
| ENSGALG00010003737 | 0.470861304 | 0.051290929 |
| ENSGALG00010003738 | 0.215461258 | 0.191543784 |
| ENSGALG00010003739 | 0.52593984  | 0.155196339 |
| ENSGALG00010003740 | 0.679093913 | 0.158265774 |
| ENSGALG00010003742 | 0.651452626 | 0.226706596 |
| ENSGALG00010003743 | 0.796172359 | 0.083345939 |
| ENSGALG00010003744 | 0.291391904 | 0.136533702 |
| ENSGALG00010003745 | 0.407193203 | 0.187860213 |
| ENSGALG00010003746 | 0.704846956 | 0.14275699  |
| ENSGALG00010003748 | 0.270451009 | 0.090541667 |
| ENSGALG00010003749 | 0.75704988  | 0.57139259  |
| ENSGALG00010003750 | 0.997426663 | 0.33614887  |
| ENSGALG00010003751 | 0.39155441  | 0.07460765  |
| ENSGALG00010003753 | 0.965372443 | 0.306983052 |
| ENSGALG00010003754 | 0.972848047 | 0.416219372 |
| ENSGALG00010003755 | 0.871187049 | 0.220924192 |
| ENSGALG00010003756 | 0.474268348 | 0.43463797  |
| ENSGALG00010003757 | 0.545743575 | 0.172584057 |
| ENSGALG00010003758 | 0.948464723 | 0.150552026 |
| ENSGALG00010003759 | 0.264239718 | 0.073427965 |
| ENSGALG00010003760 | 0.249651824 | 0.095925253 |
| ENSGALG00010003761 | 0.975613863 | 0.246535295 |
| ENSGALG00010003762 | 0.980762475 | 0.337611014 |
| ENSGALG00010003763 | 0.056816994 | 0.074976849 |
| ENSGALG00010003764 | 0.930531628 | 0.331936806 |
| ENSGALG00010003765 | 0.917650638 | 0.198631761 |
| ENSGALG00010003766 | 0.781510113 | 0.318030064 |
| ENSGALG00010003767 | 0.261145848 | 0.037777787 |
| ENSGALG00010003768 | 0.546358234 | 0.136643049 |
| ENSGALG00010003769 | 0.562958499 | 0.028674529 |
| ENSGALG00010003770 | 0.147647715 | 0.061176691 |
| ENSGALG00010003771 | 0.044367189 | 0.300494749 |
| ENSGALG00010003772 | 0.380946785 | 0.181642936 |
| ENSGALG00010003773 | 0.098617306 | 0.195747229 |
| ENSGALG00010003774 | 0.90450863  | 0.285568639 |
| ENSGALG00010003775 | 0.861392241 | 0.231321253 |
| ENSGALG00010003776 | 0.922070107 | 0.281517367 |
| ENSGALG00010003777 | 0.394367059 | 0.123226926 |
| ENSGALG00010003778 | 0.274903919 | 0.104782153 |
| ENSGALG00010003779 | 0.008043983 | 0.110635211 |
| ENSGALG00010003781 | 0.449716953 | 0.054005331 |
| ENSGALG00010003783 | 0.519706477 | 0.040584863 |

|                    |             |             |
|--------------------|-------------|-------------|
| ENSGALG00010003784 | 0.895282301 | 0.209866027 |
| ENSGALG00010003785 | 0.193201469 | 0.214500937 |
| ENSGALG00010003786 | 0.118498134 | 0.255318368 |
| ENSGALG00010003787 | 0.920466763 | 0.277765167 |
| ENSGALG00010003788 | 0.307782724 | 0.120262487 |
| ENSGALG00010003789 | 0.383975425 | 0.311146784 |
| ENSGALG00010003790 | 0.989781018 | 0.300986304 |
| ENSGALG00010003791 | 0.777754481 | 0.093726757 |
| ENSGALG00010003792 | 0.631794336 | 0.225727293 |
| ENSGALG00010003793 | 0.604029498 | 0.302561221 |
| ENSGALG00010003794 | 0.230413829 | 0.265058991 |
| ENSGALG00010003795 | 0.988215125 | 0.303431202 |
| ENSGALG00010003796 | 0.177336903 | 0.109240256 |
| ENSGALG00010003797 | 0.97964055  | 0.325554325 |
| ENSGALG00010003798 | 0.396668506 | 0.181671381 |
| ENSGALG00010003799 | 0.199172908 | 0.188012133 |
| ENSGALG00010003800 | 0.583204113 | 0.200288107 |
| ENSGALG00010003801 | 0.798079253 | 0.281626084 |
| ENSGALG00010003803 | 0.847319142 | 0.338104071 |
| ENSGALG00010003804 | 0.713060647 | 0.403592649 |
| ENSGALG00010003806 | 0.974965209 | 0.340084703 |
| ENSGALG00010003807 | 0.79901806  | 0.406597191 |
| ENSGALG00010003808 | 0.873063608 | 0.246724875 |
| ENSGALG00010003809 | 0.723141333 | 0.2315194   |
| ENSGALG00010003810 | 0.989865776 | 0.297555757 |
| ENSGALG00010003811 | 0.996054664 | 0.33456763  |
| ENSGALG00010003812 | 0.612489052 | 0.426648321 |
| ENSGALG00010003813 | 0.18428844  | 0.34935688  |
| ENSGALG00010003814 | 0.592826421 | 0.462936843 |
| ENSGALG00010003815 | 0.890536073 | 0.456834226 |
| ENSGALG00010003816 | 0.878667234 | 0.493541792 |
| ENSGALG00010003817 | 0.554842987 | 0.330429702 |
| ENSGALG00010003818 | 0.837723911 | 0.367287562 |
| ENSGALG00010003819 | 0.699905242 | 0.107513339 |
| ENSGALG00010003820 | 0.435733688 | 0.052192253 |
| ENSGALG00010003821 | 0.179192807 | 0.011314274 |
| ENSGALG00010003822 | 0.672276415 | 0.441193988 |
| ENSGALG00010003823 | 0.935567815 | 0.283806526 |
| ENSGALG00010003824 | 0.5872904   | 0.383302272 |
| ENSGALG00010003825 | 0.604721454 | 0.205554982 |
| ENSGALG00010003826 | 0.627594356 | 0.053571447 |
| ENSGALG00010003827 | 0.497941643 | 0.295494368 |
| ENSGALG00010003828 | 0.633188691 | 0.367388327 |
| ENSGALG00010003829 | 0.844393352 | 0.328961286 |
| ENSGALG00010003830 | 0.347224266 | 0.058576525 |
| ENSGALG00010003831 | 0.911689961 | 0.252679173 |
| ENSGALG00010003832 | 0.963463941 | 0.211376003 |
| ENSGALG00010003833 | 0.030970995 | 0.234027066 |
| ENSGALG00010003834 | 0.176855442 | 0.203885196 |
| ENSGALG00010003835 | 0.962467558 | 0.265241084 |
| ENSGALG00010003836 | 0.8997595   | 0.270241643 |
| ENSGALG00010003837 | 0.129945308 | 0.012445902 |
| ENSGALG00010003838 | 0.08008411  | 0.183424084 |
| ENSGALG00010003839 | 0.947170988 | 0.299618485 |
| ENSGALG00010003841 | 0.948585486 | 0.339566238 |
| ENSGALG00010003842 | 0.688847734 | 0.124493083 |

|                    |             |             |
|--------------------|-------------|-------------|
| ENSGALG00010003843 | 0.132479459 | 0.195113064 |
| ENSGALG00010003844 | 0.788254132 | 0.424731953 |
| ENSGALG00010003845 | 0.985758225 | 0.314697236 |
| ENSGALG00010003847 | 0.956098346 | 0.333772581 |
| ENSGALG00010003848 | 0.677611343 | 0.23432597  |
| ENSGALG00010003849 | 0.235630588 | 0.132393411 |
| ENSGALG00010003850 | 0.915384716 | 0.180784202 |
| ENSGALG00010003851 | 0.742281021 | 0.134307293 |
| ENSGALG00010003852 | 0.868133069 | 0.340568128 |
| ENSGALG00010003853 | 0.656991224 | 0.125946268 |
| ENSGALG00010003854 | 0.892396902 | 0.361507009 |
| ENSGALG00010003855 | 0.839479689 | 0.46890711  |
| ENSGALG00010003856 | 0.771136536 | 0.289018104 |
| ENSGALG00010003858 | 0.991669304 | 0.344768352 |
| ENSGALG00010003860 | 0.881212834 | 0.238643819 |
| ENSGALG00010003861 | 0.939946764 | 0.338994599 |
| ENSGALG00010003862 | 0.983996694 | 0.334826707 |
| ENSGALG00010003863 | 0.1074886   | 0.261268043 |
| ENSGALG00010003864 | 0.325830509 | 0.254423033 |
| ENSGALG00010003865 | 0.943448117 | 0.314515995 |
| ENSGALG00010003868 | 0.138168917 | 0.103922961 |
| ENSGALG00010003869 | 0.750258674 | 0.043346671 |
| ENSGALG00010003870 | 0.633827119 | 0.066062913 |
| ENSGALG00010003871 | 0.722946434 | 0.167617145 |
| ENSGALG00010003872 | 0.222387642 | 0.257917365 |
| ENSGALG00010003874 | 0.981804526 | 0.378524019 |
| ENSGALG00010003875 | 0.778328958 | 0.089619346 |
| ENSGALG00010003877 | 0.23788527  | 0.002817365 |
| ENSGALG00010003878 | 0.83377193  | 0.27262198  |
| ENSGALG00010003879 | 0.932164517 | 0.151749942 |
| ENSGALG00010003882 | 0.885255909 | 0.07160147  |
| ENSGALG00010003883 | 0.059020822 | 0.180345661 |
| ENSGALG00010003884 | 0.453005608 | 0.1015344   |
| ENSGALG00010003887 | 0.84160079  | 0.117422789 |
| ENSGALG00010003889 | 0.877934909 | 0.160939603 |
| ENSGALG00010003890 | 0.742491293 | 0.247659545 |
| ENSGALG00010003893 | 0.465092004 | 0.15227717  |
| ENSGALG00010003894 | 0.982112202 | 0.271533705 |
| ENSGALG00010003895 | 0.865390641 | 0.040395729 |
| ENSGALG00010003896 | 0.949813013 | 0.283777756 |
| ENSGALG00010003897 | 0.817520907 | 0.212586914 |
| ENSGALG00010003898 | 0.884639865 | 0.267782455 |
| ENSGALG00010003899 | 0.081094107 | 0.149632189 |
| ENSGALG00010003900 | 0.912480796 | 0.252478551 |
| ENSGALG00010003902 | 0.953737407 | 0.364543375 |
| ENSGALG00010003903 | 0.986133114 | 0.36452548  |
| ENSGALG00010003909 | 0.557727677 | 0.08580001  |
| ENSGALG00010003910 | 0.911399123 | 0.349760719 |
| ENSGALG00010003913 | 0.965178233 | 0.295662895 |
| ENSGALG00010003914 | 0.915951999 | 0.262287165 |
| ENSGALG00010003915 | 0.623832624 | 0.104322821 |
| ENSGALG00010003918 | 0.534759157 | 0.65242646  |
| ENSGALG00010003920 | 0.804037518 | 0.34928034  |
| ENSGALG00010003921 | 0.406978523 | 0.109363757 |
| ENSGALG00010003922 | 0.245700908 | 0.010899108 |
| ENSGALG00010003923 | 0.654813399 | 0.194817717 |



|                    |             |             |
|--------------------|-------------|-------------|
| ENSGALG00010003924 | 0.150803076 | 0.13717728  |
| ENSGALG00010003925 | 0.899993121 | 0.176827636 |
| ENSGALG00010003928 | 0.960732877 | 0.297270655 |
| ENSGALG00010003929 | 0.520559197 | 0.207634232 |
| ENSGALG00010003932 | 0.453713345 | 0.091608454 |
| ENSGALG00010003933 | 0.972079829 | 0.404884564 |
| ENSGALG00010003935 | 0.521491133 | 0.242330835 |
| ENSGALG00010003937 | 0.900350235 | 0.397562657 |
| ENSGALG00010003939 | 0.335553126 | 0.154693383 |
| ENSGALG00010003940 | 0.778920323 | 0.345226129 |
| ENSGALG00010003941 | 0.929827556 | 0.37439592  |
| ENSGALG00010003943 | 0.946158543 | 0.316220288 |
| ENSGALG00010003944 | 0.698163581 | 0.293680279 |
| ENSGALG00010003945 | 0.023281626 | 0.151646943 |
| ENSGALG00010003948 | 0.206871925 | 0.248714914 |
| ENSGALG00010003950 | 0.877692685 | 0.293741007 |
| ENSGALG00010003951 | 0.475975319 | 0.223012701 |
| ENSGALG00010003953 | 0.80126755  | 0.144447442 |
| ENSGALG00010003956 | 0.275073634 | 0.137563663 |
| ENSGALG00010003958 | 0.979470773 | 0.219741293 |
| ENSGALG00010003959 | 0.40407931  | 0.24317184  |
| ENSGALG00010003960 | 0.957374533 | 0.270754325 |
| ENSGALG00010003961 | 0.141302448 | 0.094724793 |
| ENSGALG00010003962 | 0.893912084 | 0.192900538 |
| ENSGALG00010003963 | 0.110625341 | 0.160302958 |
| ENSGALG00010003965 | 0.657173864 | 0.21254842  |
| ENSGALG00010003968 | 0.935094158 | 0.382582172 |
| ENSGALG00010003972 | 0.991868279 | 0.348348043 |
| ENSGALG00010003977 | 0.971992644 | 0.239696401 |
| ENSGALG00010003978 | 0.981950885 | 0.343187228 |
| ENSGALG00010003980 | 0.965461805 | 0.284195894 |
| ENSGALG00010003981 | 0.989987189 | 0.327497146 |
| ENSGALG00010003982 | 0.958162658 | 0.322308687 |
| ENSGALG00010003985 | 0.92769978  | 0.272875568 |
| ENSGALG00010003986 | 0.892062425 | 0.422349681 |
| ENSGALG00010003987 | 0.050201373 | 0.155932479 |
| ENSGALG00010003988 | 0.27861604  | 0.105617638 |
| ENSGALG00010003990 | 0.253183748 | 0.134355641 |
| ENSGALG00010003993 | 0.968800742 | 0.279965467 |
| ENSGALG00010003994 | 0.990056966 | 0.35181895  |
| ENSGALG00010003995 | 0.63034915  | 0.550089121 |
| ENSGALG00010004000 | 0.889140674 | 0.237009667 |
| ENSGALG00010004001 | 0.95616087  | 0.254235744 |
| ENSGALG00010004002 | 0.918378169 | 0.334004687 |
| ENSGALG00010004003 | 0.115651573 | 0.417972781 |
| ENSGALG00010004006 | 0.322445922 | 0.072805369 |
| ENSGALG00010004007 | 0.642708686 | 0.32576823  |
| ENSGALG00010004012 | 0.700122013 | 0.409428423 |
| ENSGALG00010004013 | 0.814699905 | 0.268479074 |
| ENSGALG00010004015 | 0.492523084 | 0.200387707 |
| ENSGALG00010004016 | 0.312353223 | 0.206595394 |
| ENSGALG00010004018 | 0.904016202 | 0.217971197 |
| ENSGALG00010004023 | 0.404886942 | 0.037874908 |
| ENSGALG00010004024 | 0.33836361  | 0.307557996 |
| ENSGALG00010004029 | 0.89457251  | 0.240099769 |
| ENSGALG00010004033 | 0.646046785 | 0.199598976 |

|                    |             |             |
|--------------------|-------------|-------------|
| ENSGALG00010004034 | 0.959816009 | 0.268626716 |
| ENSGALG00010004035 | 0.941853178 | 0.145220012 |
| ENSGALG00010004037 | 0.100664681 | 0.185461778 |
| ENSGALG00010004038 | 0.951539002 | 0.247116423 |
| ENSGALG00010004039 | 0.889312088 | 0.249666283 |
| ENSGALG00010004040 | 0.906108257 | 0.356570558 |
| ENSGALG00010004041 | 0.613586786 | 0.490913623 |
| ENSGALG00010004042 | 0.003319633 | 0.247171187 |
| ENSGALG00010004043 | 0.874683009 | 0.283537396 |
| ENSGALG00010004044 | 0.957979406 | 0.392582104 |
| ENSGALG00010004045 | 0.099916924 | 0.144054513 |
| ENSGALG00010004046 | 0.853286345 | 0.322695462 |
| ENSGALG00010004047 | 0.620044465 | 0.585199781 |
| ENSGALG00010004049 | 0.94936813  | 0.308259442 |
| ENSGALG00010004050 | 0.782674801 | 0.245504622 |
| ENSGALG00010004053 | 0.832676558 | 0.100459625 |
| ENSGALG00010004054 | 0.683421265 | 0.158627862 |
| ENSGALG00010004055 | 0.979486664 | 0.317777577 |
| ENSGALG00010004056 | 0.565771866 | 0.245462375 |
| ENSGALG00010004057 | 0.566698674 | 0.003569204 |
| ENSGALG00010004058 | 0.980009722 | 0.275506464 |
| ENSGALG00010004060 | 0.8928937   | 0.466827156 |
| ENSGALG00010004061 | 0.288492687 | 0.199597344 |
| ENSGALG00010004063 | 0.834049516 | 0.3997365   |
| ENSGALG00010004064 | 0.882132116 | 0.136183696 |
| ENSGALG00010004065 | 0.380773522 | 0.245009732 |
| ENSGALG00010004066 | 0.159710197 | 0.212441481 |
| ENSGALG00010004067 | 0.05558615  | 0.124683193 |
| ENSGALG00010004069 | 0.277566769 | 0.107857127 |
| ENSGALG00010004070 | 0.993079359 | 0.277628816 |
| ENSGALG00010004071 | 0.186300686 | 0.087818217 |
| ENSGALG00010004072 | 0.984515914 | 0.277000683 |
| ENSGALG00010004073 | 0.085497345 | 0.472198778 |
| ENSGALG00010004074 | 0.288966659 | 0.013641522 |
| ENSGALG00010004076 | 0.969229377 | 0.255829973 |
| ENSGALG00010004077 | 0.845716191 | 0.413583645 |
| ENSGALG00010004079 | 0.964674124 | 0.364424618 |
| ENSGALG00010004080 | 0.045361648 | 0.071024779 |
| ENSGALG00010004081 | 0.952912584 | 0.331259905 |
| ENSGALG00010004082 | 0.531046089 | 0.375217916 |
| ENSGALG00010004083 | 0.868968726 | 0.271345486 |
| ENSGALG00010004085 | 0.203724337 | 0.054897037 |
| ENSGALG00010004086 | 0.67034786  | 0.254645971 |
| ENSGALG00010004087 | 0.96440984  | 0.292846054 |
| ENSGALG00010004088 | 0.85424739  | 0.334690658 |
| ENSGALG00010004089 | 0.380163374 | 0.082113198 |
| ENSGALG00010004090 | 0.381744995 | 0.351846763 |
| ENSGALG00010004091 | 0.345111395 | 0.412515077 |
| ENSGALG00010004092 | 0.977789549 | 0.238396099 |
| ENSGALG00010004093 | 0.845566009 | 0.196639482 |
| ENSGALG00010004094 | 0.322075766 | 0.335418656 |
| ENSGALG00010004095 | 0.817714286 | 0.401848322 |
| ENSGALG00010004096 | 0.776546685 | 0.228552278 |
| ENSGALG00010004097 | 0.12300267  | 0.12002686  |
| ENSGALG00010004098 | 0.697318972 | 0.131723542 |
| ENSGALG00010004099 | 0.952723909 | 0.307352854 |

|                    |             |             |
|--------------------|-------------|-------------|
| ENSGALG00010004100 | 0.005753495 | 0.103741412 |
| ENSGALG00010004101 | 0.856858643 | 0.207748003 |
| ENSGALG00010004102 | 0.90839725  | 0.248821285 |
| ENSGALG00010004103 | 0.739067945 | 0.393355781 |
| ENSGALG00010004104 | 0.89227608  | 0.354853732 |
| ENSGALG00010004105 | 0.869073256 | 0.154611531 |
| ENSGALG00010004106 | 0.091979775 | 0.34528311  |
| ENSGALG00010004107 | 0.917406213 | 0.181274347 |
| ENSGALG00010004108 | 0.060018443 | 0.226151612 |
| ENSGALG00010004109 | 0.925540569 | 0.188499205 |
| ENSGALG00010004110 | 0.604139568 | 0.273819251 |
| ENSGALG00010004111 | 0.928218748 | 0.224689437 |
| ENSGALG00010004112 | 0.386067924 | 0.133174077 |
| ENSGALG00010004113 | 0.940473626 | 0.492324477 |
| ENSGALG00010004114 | 0.211714813 | 0.010861468 |
| ENSGALG00010004116 | 0.929838842 | 0.48625635  |
| ENSGALG00010004117 | 0.975311557 | 0.354035778 |
| ENSGALG00010004118 | 0.388404098 | 0.148641621 |
| ENSGALG00010004119 | 0.976091634 | 0.304503233 |
| ENSGALG00010004120 | 0.561728293 | 0.147037025 |
| ENSGALG00010004121 | 0.405797923 | 0.13200104  |
| ENSGALG00010004122 | 0.98939801  | 0.335212139 |
| ENSGALG00010004123 | 0.689283107 | 0.451525122 |
| ENSGALG00010004125 | 0.441086231 | 0.184475956 |
| ENSGALG00010004127 | 0.256116925 | 0.391633556 |
| ENSGALG00010004128 | 0.838732592 | 0.34842756  |
| ENSGALG00010004130 | 0.372796048 | 0.167811456 |
| ENSGALG00010004131 | 0.974705074 | 0.37361409  |
| ENSGALG00010004132 | 0.378986826 | 0.110289096 |
| ENSGALG00010004133 | 0.474701096 | 0.332010266 |
| ENSGALG00010004135 | 0.730954181 | 0.450018784 |
| ENSGALG00010004137 | 0.971912178 | 0.410492033 |
| ENSGALG00010004138 | 0.758870699 | 0.24764207  |
| ENSGALG00010004139 | 0.874899766 | 0.318465679 |
| ENSGALG00010004140 | 0.0712284   | 0.18890371  |
| ENSGALG00010004141 | 0.993861479 | 0.312699508 |
| ENSGALG00010004142 | 0.950221625 | 0.413538937 |
| ENSGALG00010004143 | 0.246513322 | 0.52174039  |
| ENSGALG00010004144 | 0.643017503 | 0.266201275 |
| ENSGALG00010004145 | 0.222104581 | 0.140461329 |
| ENSGALG00010004146 | 0.806816675 | 0.12756736  |
| ENSGALG00010004147 | 0.645584134 | 0.140144021 |
| ENSGALG00010004148 | 0.983287391 | 0.379693709 |
| ENSGALG00010004149 | 0.836699109 | 0.115060666 |
| ENSGALG00010004150 | 0.415966549 | 0.08338041  |
| ENSGALG00010004153 | 0.395556858 | 0.102965232 |
| ENSGALG00010004154 | 0.991926992 | 0.365790842 |
| ENSGALG00010004158 | 0.867850541 | 0.298852548 |
| ENSGALG00010004164 | 0.146555911 | 0.157925269 |
| ENSGALG00010004172 | 0.959698094 | 0.377436985 |
| ENSGALG00010004173 | 0.347516458 | 0.258228165 |
| ENSGALG00010004175 | 0.624742806 | 0.253038781 |
| ENSGALG00010004177 | 0.090916672 | 0.240216732 |
| ENSGALG00010004178 | 0.358543526 | 0.309448517 |
| ENSGALG00010004181 | 0.266170488 | 0.124364713 |
| ENSGALG00010004187 | 0.536295729 | 0.072845589 |

|                    |             |             |
|--------------------|-------------|-------------|
| ENSGALG00010004188 | 0.958609039 | 0.440565962 |
| ENSGALG00010004191 | 0.946977769 | 0.238202463 |
| ENSGALG00010004194 | 0.685856161 | 0.217612417 |
| ENSGALG00010004195 | 0.024689244 | 0.135282994 |
| ENSGALG00010004196 | 0.231926346 | 0.072157719 |
| ENSGALG00010004198 | 0.63360744  | 0.200830109 |
| ENSGALG00010004200 | 0.991102315 | 0.294805624 |
| ENSGALG00010004205 | 0.789702425 | 0.297026419 |
| ENSGALG00010004207 | 0.940258786 | 0.317716632 |
| ENSGALG00010004210 | 0.973344992 | 0.339058211 |
| ENSGALG00010004211 | 0.623714681 | 0.234046778 |
| ENSGALG00010004212 | 0.916960579 | 0.318002425 |
| ENSGALG00010004214 | 0.92495405  | 0.286657307 |
| ENSGALG00010004215 | 0.587757021 | 0.290944479 |
| ENSGALG00010004216 | 0.013621403 | 0.107361756 |
| ENSGALG00010004217 | 0.725075443 | 0.123624506 |
| ENSGALG00010004218 | 0.308758304 | 0.100827364 |
| ENSGALG00010004219 | 0.977569792 | 0.271626546 |
| ENSGALG00010004220 | 0.744265555 | 0.312222766 |
| ENSGALG00010004222 | 0.933003449 | 0.302459091 |
| ENSGALG00010004224 | 0.837916944 | 0.083674994 |
| ENSGALG00010004225 | 0.786181435 | 0.174719434 |
| ENSGALG00010004226 | 0.815440663 | 0.275570708 |
| ENSGALG00010004227 | 0.38718504  | 0.101838932 |
| ENSGALG00010004228 | 0.775502472 | 0.277690292 |
| ENSGALG00010004229 | 0.298140893 | 0.421788492 |
| ENSGALG00010004230 | 0.753540761 | 0.141641531 |
| ENSGALG00010004231 | 0.032786322 | 0.295792709 |
| ENSGALG00010004233 | 0.503873384 | 0.044646797 |
| ENSGALG00010004234 | 0.185981752 | 0.184718158 |
| ENSGALG00010004235 | 0.475012278 | 0.125191971 |
| ENSGALG00010004236 | 0.771418329 | 0.545654507 |
| ENSGALG00010004237 | 0.960635256 | 0.294780671 |
| ENSGALG00010004238 | 0.945484797 | 0.421568336 |
| ENSGALG00010004240 | 0.951113432 | 0.364599428 |
| ENSGALG00010004241 | 0.686027652 | 0.005468117 |
| ENSGALG00010004242 | 0.532441947 | 0.022821239 |
| ENSGALG00010004243 | 0.894650645 | 0.334089358 |
| ENSGALG00010004244 | 0.931366373 | 0.378108825 |
| ENSGALG00010004245 | 0.583833838 | 0.056791646 |
| ENSGALG00010004246 | 0.014014488 | 0.111917686 |
| ENSGALG00010004247 | 0.975507486 | 0.36260265  |
| ENSGALG00010004248 | 0.932005912 | 0.304848007 |
| ENSGALG00010004249 | 0.955776692 | 0.28174915  |
| ENSGALG00010004250 | 0.855854409 | 0.425399177 |
| ENSGALG00010004251 | 0.124678997 | 0.242349635 |
| ENSGALG00010004252 | 0.486367749 | 0.198114684 |
| ENSGALG00010004253 | 0.65128621  | 0.199550355 |
| ENSGALG00010004254 | 0.192356465 | 0.148868047 |
| ENSGALG00010004255 | 0.918763608 | 0.305593632 |
| ENSGALG00010004256 | 0.052213134 | 0.383781291 |
| ENSGALG00010004257 | 0.213884327 | 0.139873272 |
| ENSGALG00010004258 | 0.029558715 | 0.175619474 |
| ENSGALG00010004259 | 0.129682451 | 0.227988131 |
| ENSGALG00010004262 | 0.866284219 | 0.332098216 |
| ENSGALG00010004263 | 0.050115024 | 0.155140157 |

|                    |             |             |
|--------------------|-------------|-------------|
| ENSGALG00010004264 | 0.873793944 | 0.291929929 |
| ENSGALG00010004265 | 0.177104338 | 0.168490618 |
| ENSGALG00010004266 | 0.479020464 | 0.125675697 |
| ENSGALG00010004267 | 0.687868856 | 0.215664403 |
| ENSGALG00010004273 | 0.235630588 | 0.132393411 |
| ENSGALG00010004274 | 0.175678469 | 0.139522726 |
| ENSGALG00010004276 | 0.37526789  | 0.118093036 |
| ENSGALG00010004277 | 0.269042686 | 0.038441503 |
| ENSGALG00010004278 | 0.265558089 | 0.028821141 |
| ENSGALG00010004281 | 0.992190474 | 0.381087979 |
| ENSGALG00010004282 | 0.326265175 | 0.058327135 |
| ENSGALG00010004283 | 0.125090114 | 0.111434688 |
| ENSGALG00010004284 | 0.256828349 | 0.119064955 |
| ENSGALG00010004285 | 0.665769453 | 0.688691875 |
| ENSGALG00010004286 | 0.685218381 | 0.010397705 |
| ENSGALG00010004289 | 0.907283266 | 0.319906363 |
| ENSGALG00010004290 | 0.109305411 | 0.156099278 |
| ENSGALG00010004291 | 0.130760297 | 0.361243107 |
| ENSGALG00010004292 | 0.364530168 | 0.264515588 |
| ENSGALG00010004294 | 0.385953062 | 0.133261917 |
| ENSGALG00010004295 | 0.811814499 | 0.021035032 |
| ENSGALG00010004297 | 0.896032109 | 0.291607287 |
| ENSGALG00010004298 | 0.275822561 | 0.000152595 |
| ENSGALG00010004299 | 0.652384329 | 0.239956491 |
| ENSGALG00010004300 | 0.953642571 | 0.421090256 |
| ENSGALG00010004302 | 0.90738798  | 0.231358393 |
| ENSGALG00010004303 | 0.041713203 | 0.225464311 |
| ENSGALG00010004306 | 0.4319912   | 0.400197792 |
| ENSGALG00010004307 | 0.954101002 | 0.333036028 |
| ENSGALG00010004308 | 0.981835463 | 0.294971641 |
| ENSGALG00010004309 | 0.738306623 | 0.150597065 |
| ENSGALG00010004310 | 0.32399311  | 0.10716461  |
| ENSGALG00010004311 | 0.386956996 | 0.157865948 |
| ENSGALG00010004312 | 0.993918594 | 0.326295671 |
| ENSGALG00010004315 | 0.974322193 | 0.340622356 |
| ENSGALG00010004319 | 0.948981794 | 0.455189355 |
| ENSGALG00010004320 | 0.208550923 | 0.676301294 |
| ENSGALG00010004321 | 0.663508677 | 0.074227487 |
| ENSGALG00010004323 | 0.348621627 | 0.000326195 |
| ENSGALG00010004325 | 0.975591933 | 0.372880167 |
| ENSGALG00010004327 | 0.374184405 | 0.202787171 |
| ENSGALG00010004329 | 0.967397923 | 0.387209943 |
| ENSGALG00010004330 | 0.893223227 | 0.294491502 |
| ENSGALG00010004332 | 0.241128174 | 0.111231046 |
| ENSGALG00010004333 | 0.806789083 | 0.342495903 |
| ENSGALG00010004334 | 0.665685852 | 0.015438297 |
| ENSGALG00010004336 | 0.427652329 | 0.27389309  |
| ENSGALG00010004337 | 0.231780554 | 0.428571759 |
| ENSGALG00010004338 | 0.996794393 | 0.341971921 |
| ENSGALG00010004339 | 0.961988949 | 0.317465135 |
| ENSGALG00010004340 | 0.354441585 | 0.107132351 |
| ENSGALG00010004341 | 0.957586307 | 0.353601483 |
| ENSGALG00010004342 | 0.884798979 | 0.290451455 |
| ENSGALG00010004343 | 0.271701261 | 0.072417625 |
| ENSGALG00010004344 | 0.36547348  | 0.429694444 |
| ENSGALG00010004345 | 0.036941359 | 0.214921564 |

|                    |             |             |
|--------------------|-------------|-------------|
| ENSGALG00010004346 | 0.809192697 | 0.096092871 |
| ENSGALG00010004347 | 0.381608622 | 0.094262957 |
| ENSGALG00010004350 | 0.985498437 | 0.362886719 |
| ENSGALG00010004352 | 0.960062853 | 0.360268974 |
| ENSGALG00010004355 | 0.826357033 | 0.196928215 |
| ENSGALG00010004356 | 0.914800735 | 0.39309395  |
| ENSGALG00010004358 | 0.997439569 | 0.336634972 |
| ENSGALG00010004359 | 0.462738032 | 0.210802015 |
| ENSGALG00010004360 | 0.973607436 | 0.25832629  |
| ENSGALG00010004361 | 0.969675962 | 0.313782975 |
| ENSGALG00010004362 | 0.965388485 | 0.295113479 |
| ENSGALG00010004365 | 0.900172878 | 0.135317697 |
| ENSGALG00010004366 | 0.951142732 | 0.189801964 |
| ENSGALG00010004367 | 0.890987101 | 0.220065815 |
| ENSGALG00010004368 | 0.544336427 | 0.433881138 |
| ENSGALG00010004369 | 0.985632176 | 0.31850648  |
| ENSGALG00010004370 | 0.500456633 | 0.427121612 |
| ENSGALG00010004371 | 0.271701261 | 0.072417625 |
| ENSGALG00010004372 | 0.901896318 | 0.228600778 |
| ENSGALG00010004373 | 0.703869739 | 0.25001071  |
| ENSGALG00010004374 | 0.994008927 | 0.289436661 |
| ENSGALG00010004375 | 0.9259514   | 0.344312065 |
| ENSGALG00010004377 | 0.142229601 | 0.306073777 |
| ENSGALG00010004378 | 0.908570601 | 0.306849998 |
| ENSGALG00010004379 | 0.936118221 | 0.434606086 |
| ENSGALG00010004380 | 0.743544755 | 0.265340948 |
| ENSGALG00010004381 | 0.579504438 | 0.216516835 |
| ENSGALG00010004383 | 0.101554226 | 0.031780779 |
| ENSGALG00010004384 | 0.732875385 | 0.401540658 |
| ENSGALG00010004385 | 0.950181238 | 0.272340606 |
| ENSGALG00010004386 | 0.215016821 | 0.656254954 |
| ENSGALG00010004389 | 0.662000453 | 0.484069336 |
| ENSGALG00010004390 | 0.707753611 | 0.332523576 |
| ENSGALG00010004391 | 0.797315779 | 0.310061245 |
| ENSGALG00010004393 | 0.965917185 | 0.290459572 |
| ENSGALG00010004394 | 0.97704112  | 0.267523228 |
| ENSGALG00010004395 | 0.088124561 | 0.110100763 |
| ENSGALG00010004396 | 0.155528963 | 0.172652865 |
| ENSGALG00010004397 | 0.011764112 | 0.292420853 |
| ENSGALG00010004398 | 0.375877828 | 0.164310454 |
| ENSGALG00010004399 | 0.429516227 | 0.258559703 |
| ENSGALG00010004401 | 0.928767383 | 0.30737365  |
| ENSGALG00010004402 | 0.529797453 | 0.211877086 |
| ENSGALG00010004403 | 0.346799595 | 0.356949556 |
| ENSGALG00010004404 | 0.08439784  | 0.025665108 |
| ENSGALG00010004405 | 0.317823624 | 0.156280464 |
| ENSGALG00010004406 | 0.401175792 | 0.16717388  |
| ENSGALG00010004408 | 0.642027213 | 0.216126921 |
| ENSGALG00010004409 | 0.96660642  | 0.287229646 |
| ENSGALG00010004410 | 0.30914455  | 0.175530498 |
| ENSGALG00010004411 | 0.08503538  | 0.178477399 |
| ENSGALG00010004412 | 0.615674699 | 0.439391383 |
| ENSGALG00010004414 | 0.886318323 | 0.226148055 |
| ENSGALG00010004415 | 0.317468071 | 0.452961925 |
| ENSGALG00010004416 | 0.950106756 | 0.258467902 |
| ENSGALG00010004420 | 0.98878789  | 0.366265351 |

|                    |             |             |
|--------------------|-------------|-------------|
| ENSGALG00010004421 | 0.386697888 | 0.064543587 |
| ENSGALG00010004423 | 0.419908233 | 0.231814228 |
| ENSGALG00010004424 | 0.947095633 | 0.273672457 |
| ENSGALG00010004425 | 0.535882048 | 0.255153776 |
| ENSGALG00010004429 | 0.270477661 | 0.284383882 |
| ENSGALG00010004430 | 0.96386548  | 0.13126068  |
| ENSGALG00010004431 | 0.278069745 | 0.045734197 |
| ENSGALG00010004433 | 0.988913185 | 0.287386645 |
| ENSGALG00010004434 | 0.471178857 | 0.26205905  |
| ENSGALG00010004435 | 0.49355053  | 0.315912394 |
| ENSGALG00010004436 | 0.912428814 | 0.25294061  |
| ENSGALG00010004440 | 0.754555321 | 0.198634895 |
| ENSGALG00010004442 | 0.672425042 | 0.315775436 |
| ENSGALG00010004443 | 0.878329548 | 0.382883831 |
| ENSGALG00010004445 | 0.308758304 | 0.100827364 |
| ENSGALG00010004446 | 0.970559955 | 0.330375727 |
| ENSGALG00010004448 | 0.498047487 | 0.145770051 |
| ENSGALG00010004450 | 0.724757197 | 0.262841037 |
| ENSGALG00010004451 | 0.715604329 | 0.132001737 |
| ENSGALG00010004454 | 0.937125838 | 0.2013426   |
| ENSGALG00010004457 | 0.967012251 | 0.304240096 |
| ENSGALG00010004458 | 0.432712051 | 0.240393627 |
| ENSGALG00010004459 | 0.3514537   | 0.11239814  |
| ENSGALG00010004460 | 0.423188015 | 0.175642895 |
| ENSGALG00010004461 | 0.311997177 | 0.424590371 |
| ENSGALG00010004464 | 0.011199134 | 0.012807924 |
| ENSGALG00010004468 | 0.572158844 | 0.115115362 |
| ENSGALG00010004469 | 0.497323542 | 0.331011367 |
| ENSGALG00010004471 | 0.958136266 | 0.265598891 |
| ENSGALG00010004472 | 0.816900919 | 0.434255754 |
| ENSGALG00010004473 | 0.080894863 | 0.117718561 |
| ENSGALG00010004475 | 0.37304904  | 0.131841775 |
| ENSGALG00010004476 | 0.830552503 | 0.292184903 |
| ENSGALG00010004477 | 0.757163865 | 0.287950576 |
| ENSGALG00010004479 | 0.981413323 | 0.34374178  |
| ENSGALG00010004480 | 0.81581572  | 0.380788717 |
| ENSGALG00010004481 | 0.952626584 | 0.388552216 |
| ENSGALG00010004482 | 0.381415582 | 0.158761082 |
| ENSGALG00010004483 | 0.971449555 | 0.32802348  |
| ENSGALG00010004484 | 0.658641828 | 0.228999741 |
| ENSGALG00010004485 | 0.520017927 | 0.21386933  |
| ENSGALG00010004487 | 0.038549738 | 0.188924109 |
| ENSGALG00010004489 | 0.290585849 | 0.181199568 |
| ENSGALG00010004490 | 0.462840333 | 0.205813513 |
| ENSGALG00010004491 | 0.463754168 | 0.204317474 |
| ENSGALG00010004493 | 0.763710142 | 0.316121718 |
| ENSGALG00010004494 | 0.847790247 | 0.262638451 |
| ENSGALG00010004495 | 0.00340322  | 0.129953815 |
| ENSGALG00010004500 | 0.73526713  | 0.416206303 |
| ENSGALG00010004501 | 0.068247438 | 0.000551906 |
| ENSGALG00010004502 | 0.092853389 | 0.297573914 |
| ENSGALG00010004503 | 0.878576843 | 0.360954336 |
| ENSGALG00010004504 | 0.102433888 | 0.23864989  |
| ENSGALG00010004505 | 0.744371734 | 0.379945891 |
| ENSGALG00010004507 | 0.846411908 | 0.200597657 |
| ENSGALG00010004515 | 0.882002823 | 0.211912416 |

|                    |             |             |
|--------------------|-------------|-------------|
| ENSGALG00010004516 | 0.051606007 | 0.145348651 |
| ENSGALG00010004517 | 0.576319221 | 0.158794173 |
| ENSGALG00010004518 | 0.271701261 | 0.072417625 |
| ENSGALG00010004519 | 0.660194314 | 0.194854869 |
| ENSGALG00010004520 | 0.924795988 | 0.365815313 |
| ENSGALG00010004522 | 0.567535793 | 0.413092912 |
| ENSGALG00010004523 | 0.223970335 | 0.243417213 |
| ENSGALG00010004526 | 0.400778541 | 0.133797302 |
| ENSGALG00010004529 | 0.040094268 | 0.172408119 |
| ENSGALG00010004531 | 0.34252533  | 0.15605685  |
| ENSGALG00010004532 | 0.516018781 | 0.228055565 |
| ENSGALG00010004533 | 0.870264494 | 0.128340214 |
| ENSGALG00010004534 | 0.983786091 | 0.34739939  |
| ENSGALG00010004535 | 0.702419035 | 0.158415985 |
| ENSGALG00010004540 | 0.363991468 | 0.139814047 |
| ENSGALG00010004541 | 0.441865379 | 0.009139954 |
| ENSGALG00010004542 | 0.723909742 | 0.248490033 |
| ENSGALG00010004545 | 0.899488356 | 0.255914027 |
| ENSGALG00010004553 | 0.818839796 | 0.57464036  |
| ENSGALG00010004557 | 0.11282631  | 0.084691498 |
| ENSGALG00010004560 | 0.654108892 | 0.354796412 |
| ENSGALG00010004565 | 0.510606625 | 0.153783548 |
| ENSGALG00010004568 | 0.927489998 | 0.320566179 |
| ENSGALG00010004569 | 0.904652302 | 0.335606483 |
| ENSGALG00010004570 | 0.226056695 | 0.179342739 |
| ENSGALG00010004571 | 0.872857878 | 0.397698183 |
| ENSGALG00010004573 | 0.356238393 | 0.010999432 |
| ENSGALG00010004576 | 0.748200524 | 0.452451694 |
| ENSGALG00010004577 | 0.280209824 | 0.199653512 |
| ENSGALG00010004580 | 0.935431558 | 0.143575214 |
| ENSGALG00010004581 | 0.856636139 | 0.269821069 |
| ENSGALG00010004583 | 0.73602374  | 0.358662131 |
| ENSGALG00010004584 | 0.921060058 | 0.2420016   |
| ENSGALG00010004586 | 0.923099229 | 0.302798848 |
| ENSGALG00010004588 | 0.85405856  | 0.21417799  |
| ENSGALG00010004590 | 0.977412567 | 0.327874391 |
| ENSGALG00010004591 | 0.923463919 | 0.381841782 |
| ENSGALG00010004592 | 0.708962086 | 0.252221856 |
| ENSGALG00010004596 | 0.088955713 | 0.448530809 |
| ENSGALG00010004598 | 0.87041214  | 0.287145573 |
| ENSGALG00010004601 | 0.929564558 | 0.355721044 |
| ENSGALG00010004602 | 0.505952072 | 0.18883251  |
| ENSGALG00010004609 | 0.661980792 | 0.10617632  |
| ENSGALG00010004610 | 0.517646171 | 0.313291294 |
| ENSGALG00010004616 | 0.900276977 | 0.289150828 |
| ENSGALG00010004618 | 0.043111913 | 0.249018414 |
| ENSGALG00010004621 | 0.264239718 | 0.073427965 |
| ENSGALG00010004622 | 0.993587118 | 0.324655808 |
| ENSGALG00010004623 | 0.070284017 | 0.040336485 |
| ENSGALG00010004624 | 0.890595953 | 0.320988067 |
| ENSGALG00010004626 | 0.475051411 | 0.142786434 |
| ENSGALG00010004630 | 0.994566457 | 0.317846355 |
| ENSGALG00010004633 | 0.364245733 | 0.168369964 |
| ENSGALG00010004634 | 0.399453749 | 0.144668892 |
| ENSGALG00010004635 | 0.208500176 | 0.144881495 |
| ENSGALG00010004636 | 0.277566769 | 0.107857127 |



|                    |             |             |
|--------------------|-------------|-------------|
| ENSGALG00010004637 | 0.530443077 | 0.465483656 |
| ENSGALG00010004638 | 0.151405028 | 0.085694576 |
| ENSGALG00010004639 | 0.909827413 | 0.291663546 |
| ENSGALG00010004641 | 0.709929504 | 0.403922975 |
| ENSGALG00010004642 | 0.368270834 | 0.170752567 |
| ENSGALG00010004646 | 0.271701261 | 0.072417625 |
| ENSGALG00010004647 | 0.339444113 | 0.045741665 |
| ENSGALG00010004648 | 0.262545058 | 0.073484319 |
| ENSGALG00010004649 | 0.387155025 | 0.291685884 |
| ENSGALG00010004650 | 0.897418666 | 0.361547126 |
| ENSGALG00010004652 | 0.181138151 | 0.171220136 |
| ENSGALG00010004654 | 0.264239718 | 0.073427965 |
| ENSGALG00010004657 | 0.185549637 | 0.123776305 |
| ENSGALG00010004659 | 0.364245733 | 0.168369964 |
| ENSGALG00010004660 | 0.088650565 | 0.468351546 |
| ENSGALG00010004662 | 0.75630823  | 0.360073678 |
| ENSGALG00010004663 | 0.675189524 | 0.084247767 |
| ENSGALG00010004664 | 0.038961094 | 0.119686046 |
| ENSGALG00010004665 | 0.401569976 | 0.281035686 |
| ENSGALG00010004666 | 0.780343713 | 0.170786351 |
| ENSGALG00010004668 | 0.049695518 | 0.521447482 |
| ENSGALG00010004669 | 0.118694066 | 0.37588779  |
| ENSGALG00010004671 | 0.742903863 | 0.433905727 |
| ENSGALG00010004673 | 0.637585412 | 0.197218434 |
| ENSGALG00010004680 | 0.395418784 | 0.135316935 |
| ENSGALG00010004683 | 0.277566769 | 0.107857127 |
| ENSGALG00010004684 | 0.575627026 | 0.199190278 |
| ENSGALG00010004685 | 0.285272007 | 0.109169955 |
| ENSGALG00010004689 | 0.908668209 | 0.263675772 |
| ENSGALG00010004692 | 0.950152517 | 0.403361498 |
| ENSGALG00010004697 | 0.618548594 | 0.22482835  |
| ENSGALG00010004699 | 0.745933174 | 0.0392723   |
| ENSGALG00010004701 | 0.02879719  | 0.282610319 |
| ENSGALG00010004703 | 0.375545622 | 0.141397116 |
| ENSGALG00010004705 | 0.833285377 | 0.367239529 |
| ENSGALG00010004707 | 0.859795954 | 0.363470565 |
| ENSGALG00010004708 | 0.935404948 | 0.309928764 |
| ENSGALG00010004709 | 0.386114539 | 0.074004299 |
| ENSGALG00010004710 | 0.941084566 | 0.33822774  |
| ENSGALG00010004712 | 0.856258556 | 0.383672845 |
| ENSGALG00010004713 | 0.81967241  | 0.277528982 |
| ENSGALG00010004715 | 0.275093156 | 0.383411042 |
| ENSGALG00010004716 | 0.982442006 | 0.325474449 |
| ENSGALG00010004717 | 0.596983259 | 0.052639989 |
| ENSGALG00010004718 | 0.081670579 | 0.231183566 |
| ENSGALG00010004720 | 0.605417913 | 0.333161908 |
| ENSGALG00010004721 | 0.939600532 | 0.34819623  |
| ENSGALG00010004724 | 0.739666223 | 0.514459896 |
| ENSGALG00010004726 | 0.367899555 | 0.330436197 |
| ENSGALG00010004728 | 0.507856316 | 0.163760728 |
| ENSGALG00010004729 | 0.913758773 | 0.239412297 |
| ENSGALG00010004730 | 0.967938833 | 0.414685036 |
| ENSGALG00010004732 | 0.189240572 | 0.04996112  |
| ENSGALG00010004733 | 0.355639478 | 0.141537604 |
| ENSGALG00010004734 | 0.533644827 | 0.034888331 |
| ENSGALG00010004735 | 0.86252429  | 0.214727333 |

|                    |             |             |
|--------------------|-------------|-------------|
| ENSGALG00010004736 | 0.991355538 | 0.329084154 |
| ENSGALG00010004739 | 0.983990465 | 0.345829694 |
| ENSGALG00010004740 | 0.569092242 | 0.181950755 |
| ENSGALG00010004742 | 0.09934493  | 0.325628778 |
| ENSGALG00010004743 | 0.393763142 | 0.088137251 |
| ENSGALG00010004746 | 0.992049528 | 0.270596109 |
| ENSGALG00010004748 | 0.475501392 | 0.010269959 |
| ENSGALG00010004750 | 0.983113144 | 0.310827114 |
| ENSGALG00010004751 | 0.382874261 | 0.352083209 |
| ENSGALG00010004754 | 0.969405063 | 0.302954927 |
| ENSGALG00010004755 | 0.753529858 | 0.299875871 |
| ENSGALG00010004757 | 0.96877833  | 0.392038425 |
| ENSGALG00010004758 | 0.939174809 | 0.406465948 |
| ENSGALG00010004760 | 0.634381475 | 0.042774462 |
| ENSGALG00010004761 | 0.844352294 | 0.288641855 |
| ENSGALG00010004762 | 0.911782835 | 0.310370462 |
| ENSGALG00010004763 | 0.378612439 | 0.180485529 |
| ENSGALG00010004765 | 0.988773662 | 0.318576119 |
| ENSGALG00010004767 | 0.386307259 | 0.413341954 |
| ENSGALG00010004769 | 0.762325169 | 0.575760665 |
| ENSGALG00010004774 | 0.393096753 | 0.36166642  |
| ENSGALG00010004776 | 0.911177055 | 0.309104183 |
| ENSGALG00010004777 | 0.645578878 | 0.378101968 |
| ENSGALG00010004778 | 0.491856686 | 0.179680942 |
| ENSGALG00010004780 | 0.029461136 | 0.132198366 |
| ENSGALG00010004781 | 0.57929413  | 0.249388221 |
| ENSGALG00010004783 | 0.937137434 | 0.294641788 |
| ENSGALG00010004784 | 0.002187182 | 0.311210729 |
| ENSGALG00010004787 | 0.774395014 | 0.185759952 |
| ENSGALG00010004788 | 0.954068916 | 0.27465051  |
| ENSGALG00010004789 | 0.310254517 | 0.364263923 |
| ENSGALG00010004791 | 0.643299644 | 0.21790878  |
| ENSGALG00010004792 | 0.915650246 | 0.263526142 |
| ENSGALG00010004793 | 0.816913162 | 0.367312251 |
| ENSGALG00010004795 | 0.122274331 | 0.457072726 |
| ENSGALG00010004798 | 0.973372856 | 0.364484527 |
| ENSGALG00010004800 | 0.932177074 | 0.334059763 |
| ENSGALG00010004803 | 0.921414892 | 0.411337426 |
| ENSGALG00010004808 | 0.937753373 | 0.232201223 |
| ENSGALG00010004809 | 0.603384276 | 0.269293483 |
| ENSGALG00010004813 | 0.208550923 | 0.676301294 |
| ENSGALG00010004814 | 0.957656159 | 0.32259993  |
| ENSGALG00010004815 | 0.245771723 | 0.02202522  |
| ENSGALG00010004816 | 0.560372776 | 0.165713112 |
| ENSGALG00010004818 | 0.92775089  | 0.305666183 |
| ENSGALG00010004820 | 0.822944788 | 0.266446326 |
| ENSGALG00010004824 | 0.910859896 | 0.329287482 |
| ENSGALG00010004828 | 0.975535688 | 0.344298272 |
| ENSGALG00010004829 | 0.267742878 | 0.132359092 |
| ENSGALG00010004831 | 0.415822078 | 0.214975165 |
| ENSGALG00010004832 | 0.760803066 | 0.251351027 |
| ENSGALG00010004833 | 0.736122136 | 0.251358793 |
| ENSGALG00010004834 | 0.379796638 | 0.33436092  |
| ENSGALG00010004835 | 0.965680842 | 0.430444218 |
| ENSGALG00010004836 | 0.856075252 | 0.288784831 |
| ENSGALG00010004837 | 0.855041461 | 0.184331768 |

|                    |             |             |
|--------------------|-------------|-------------|
| ENSGALG00010004839 | 0.931237283 | 0.384158608 |
| ENSGALG00010004841 | 0.894670559 | 0.43901988  |
| ENSGALG00010004842 | 0.858967155 | 0.285108319 |
| ENSGALG00010004843 | 0.558290571 | 0.053294879 |
| ENSGALG00010004844 | 0.863534948 | 0.178735436 |
| ENSGALG00010004846 | 0.238704914 | 0.066047917 |
| ENSGALG00010004847 | 0.761399226 | 0.248579497 |
| ENSGALG00010004851 | 0.37671603  | 0.150307264 |
| ENSGALG00010004852 | 0.989418546 | 0.3373045   |
| ENSGALG00010004854 | 0.840682177 | 0.274339409 |
| ENSGALG00010004855 | 0.740127227 | 0.295417344 |
| ENSGALG00010004856 | 0.831553397 | 0.258450872 |
| ENSGALG00010004857 | 0.374383337 | 0.346057116 |
| ENSGALG00010004858 | 0.050564    | 0.120729262 |
| ENSGALG00010004859 | 0.808393394 | 0.181571408 |
| ENSGALG00010004860 | 0.311930858 | 0.122131344 |
| ENSGALG00010004861 | 0.237451044 | 0.160483973 |
| ENSGALG00010004862 | 0.074340167 | 0.008928453 |
| ENSGALG00010004863 | 0.3167141   | 0.302101562 |
| ENSGALG00010004866 | 0.930371337 | 0.329722789 |
| ENSGALG00010004868 | 0.05361597  | 0.266519371 |
| ENSGALG00010004869 | 0.153528447 | 0.240772581 |
| ENSGALG00010004871 | 0.717240925 | 0.301798695 |
| ENSGALG00010004872 | 0.925222232 | 0.292633125 |
| ENSGALG00010004873 | 0.482970746 | 0.244510928 |
| ENSGALG00010004874 | 0.229904968 | 0.381618699 |
| ENSGALG00010004875 | 0.271701261 | 0.072417625 |
| ENSGALG00010004876 | 0.258739835 | 0.239614589 |
| ENSGALG00010004878 | 0.311995916 | 0.42508406  |
| ENSGALG00010004879 | 0.234714087 | 0.219627023 |
| ENSGALG00010004880 | 0.890792008 | 0.352935255 |
| ENSGALG00010004881 | 0.939244184 | 0.284123868 |
| ENSGALG00010004883 | 0.653093499 | 0.304242418 |
| ENSGALG00010004885 | 0.203991683 | 0.058221925 |
| ENSGALG00010004887 | 0.93586907  | 0.52519552  |
| ENSGALG00010004888 | 0.997037599 | 0.336646308 |
| ENSGALG00010004890 | 0.906185018 | 0.30707695  |
| ENSGALG00010004891 | 0.067227222 | 0.000474485 |
| ENSGALG00010004892 | 0.358494397 | 0.321372695 |
| ENSGALG00010004893 | 0.126006572 | 0.365736207 |
| ENSGALG00010004896 | 0.577076245 | 0.263203216 |
| ENSGALG00010004898 | 0.003906436 | 0.050339809 |
| ENSGALG00010004899 | 0.566172846 | 0.49794575  |
| ENSGALG00010004901 | 0.916078023 | 0.251222185 |
| ENSGALG00010004902 | 0.856245945 | 0.186019443 |
| ENSGALG00010004903 | 0.846923093 | 0.346510892 |
| ENSGALG00010004906 | 0.271113979 | 0.203747319 |
| ENSGALG00010004907 | 0.327852322 | 0.09993466  |
| ENSGALG00010004908 | 0.529627058 | 0.254444218 |
| ENSGALG00010004909 | 0.216838333 | 0.540217534 |
| ENSGALG00010004911 | 0.399452143 | 0.144662594 |
| ENSGALG00010004915 | 0.24652834  | 0.309853164 |
| ENSGALG00010004917 | 0.787656112 | 0.437959878 |
| ENSGALG00010004919 | 0.394927857 | 0.119113854 |
| ENSGALG00010004920 | 0.264239718 | 0.073427965 |
| ENSGALG00010004921 | 0.996196805 | 0.305145258 |

|                    |             |             |
|--------------------|-------------|-------------|
| ENSGALG00010004924 | 0.642980539 | 0.389350874 |
| ENSGALG00010004925 | 0.271701261 | 0.072417625 |
| ENSGALG00010004926 | 0.271701261 | 0.072417625 |
| ENSGALG00010004927 | 0.60024376  | 0.074081407 |
| ENSGALG00010004928 | 0.933657176 | 0.345674375 |
| ENSGALG00010004929 | 0.951776428 | 0.309618052 |
| ENSGALG00010004931 | 0.385129618 | 0.120226607 |
| ENSGALG00010004932 | 0.032597739 | 0.058748633 |
| ENSGALG00010004933 | 0.944024122 | 0.419793051 |
| ENSGALG00010004934 | 0.818248647 | 0.22639127  |
| ENSGALG00010004935 | 0.908226595 | 0.26366675  |
| ENSGALG00010004936 | 0.018241221 | 0.116736502 |
| ENSGALG00010004938 | 0.861185719 | 0.452206362 |
| ENSGALG00010004939 | 0.443606845 | 0.247535095 |
| ENSGALG00010004942 | 0.073376936 | 0.164024345 |
| ENSGALG00010004943 | 0.118295041 | 0.169720193 |
| ENSGALG00010004944 | 0.908882761 | 0.20738007  |
| ENSGALG00010004946 | 0.828447396 | 0.241713177 |
| ENSGALG00010004948 | 0.105093336 | 0.322143658 |
| ENSGALG00010004949 | 0.571762237 | 0.305823579 |
| ENSGALG00010004950 | 0.922611571 | 0.251471642 |
| ENSGALG00010004951 | 0.973126459 | 0.242330548 |
| ENSGALG00010004952 | 0.686365482 | 0.430508287 |
| ENSGALG00010004955 | 0.843102097 | 0.281963975 |
| ENSGALG00010004956 | 0.842077321 | 0.397341619 |
| ENSGALG00010004957 | 0.031419822 | 0.159167307 |
| ENSGALG00010004958 | 0.293752397 | 0.302284688 |
| ENSGALG00010004962 | 0.986346974 | 0.330662035 |
| ENSGALG00010004963 | 0.523545303 | 0.124025053 |
| ENSGALG00010004964 | 0.81670734  | 0.237078319 |
| ENSGALG00010004965 | 0.239731232 | 0.049282697 |
| ENSGALG00010004966 | 0.595934187 | 0.436428829 |
| ENSGALG00010004967 | 0.810743814 | 0.206359339 |
| ENSGALG00010004968 | 0.787025525 | 0.05344297  |
| ENSGALG00010004969 | 0.92261686  | 0.467579159 |
| ENSGALG00010004970 | 0.361049494 | 0.315369367 |
| ENSGALG00010004971 | 0.796308999 | 0.229562668 |
| ENSGALG00010004972 | 0.53673469  | 0.060369424 |
| ENSGALG00010004973 | 0.996181356 | 0.333693407 |
| ENSGALG00010004974 | 0.757864363 | 0.368526941 |
| ENSGALG00010004975 | 0.513938491 | 0.007833986 |
| ENSGALG00010004976 | 0.97148374  | 0.301343358 |
| ENSGALG00010004977 | 0.412486142 | 0.321031476 |
| ENSGALG00010004978 | 0.196680351 | 0.261371719 |
| ENSGALG00010004979 | 0.489227462 | 0.026969251 |
| ENSGALG00010004980 | 0.735529463 | 0.420582325 |
| ENSGALG00010004981 | 0.982863234 | 0.26959325  |
| ENSGALG00010004983 | 0.071781537 | 0.333510976 |
| ENSGALG00010004984 | 0.383211517 | 0.152712488 |
| ENSGALG00010004985 | 0.992020783 | 0.333477536 |
| ENSGALG00010004987 | 0.961333202 | 0.319989039 |
| ENSGALG00010004988 | 0.709040204 | 0.366823496 |
| ENSGALG00010004990 | 0.997217498 | 0.336662203 |
| ENSGALG00010004991 | 0.883963596 | 0.050849823 |
| ENSGALG00010004992 | 0.061980386 | 0.117694959 |
| ENSGALG00010004993 | 0.954988449 | 0.40018935  |

|                    |             |             |
|--------------------|-------------|-------------|
| ENSGALG00010004994 | 0.89238695  | 0.440526844 |
| ENSGALG00010004995 | 0.99607337  | 0.338921295 |
| ENSGALG00010004996 | 0.766602281 | 0.454341536 |
| ENSGALG00010004997 | 0.655034237 | 0.042143801 |
| ENSGALG00010004998 | 0.538004959 | 0.596853774 |
| ENSGALG00010004999 | 0.772772995 | 0.057488562 |
| ENSGALG00010005000 | 0.311289807 | 0.13851383  |
| ENSGALG00010005001 | 0.281356228 | 0.317815845 |
| ENSGALG00010005003 | 0.993738475 | 0.354357431 |
| ENSGALG00010005004 | 0.953793137 | 0.263312174 |
| ENSGALG00010005005 | 0.924803138 | 0.433028778 |
| ENSGALG00010005007 | 0.988024161 | 0.335906241 |
| ENSGALG00010005008 | 0.991070715 | 0.331391362 |
| ENSGALG00010005010 | 0.681734411 | 0.106947156 |
| ENSGALG00010005011 | 0.992811915 | 0.334879594 |
| ENSGALG00010005012 | 0.935840413 | 0.485688418 |
| ENSGALG00010005014 | 0.885498839 | 0.277619359 |
| ENSGALG00010005015 | 0.496115786 | 0.179724563 |
| ENSGALG00010005016 | 0.64812744  | 0.359031893 |
| ENSGALG00010005017 | 0.97367585  | 0.311226714 |
| ENSGALG00010005023 | 0.894642931 | 0.374615869 |
| ENSGALG00010005025 | 0.934824696 | 0.211328396 |
| ENSGALG00010005026 | 0.097303109 | 0.158797063 |
| ENSGALG00010005027 | 0.919409889 | 0.122358973 |
| ENSGALG00010005029 | 0.538324164 | 0.069879147 |
| ENSGALG00010005030 | 0.389066621 | 0.118811063 |
| ENSGALG00010005033 | 0.935742131 | 0.28400458  |
| ENSGALG00010005035 | 0.834628519 | 0.137963931 |
| ENSGALG00010005037 | 0.900098572 | 0.296460547 |
| ENSGALG00010005038 | 0.64505398  | 0.386211765 |
| ENSGALG00010005039 | 0.218741569 | 0.190475163 |
| ENSGALG00010005042 | 0.948730135 | 0.406132192 |
| ENSGALG00010005043 | 0.281734348 | 0.241069156 |
| ENSGALG00010005044 | 0.314454044 | 0.050770401 |
| ENSGALG00010005045 | 0.912342748 | 0.284645539 |
| ENSGALG00010005047 | 0.368754444 | 0.215037581 |
| ENSGALG00010005048 | 0.989044477 | 0.299126591 |
| ENSGALG00010005049 | 0.729577131 | 0.462289025 |
| ENSGALG00010005054 | 0.36961805  | 0.141256136 |
| ENSGALG00010005055 | 0.309655755 | 0.987979031 |
| ENSGALG00010005056 | 0.461412531 | 0.359038832 |
| ENSGALG00010005057 | 0.965453324 | 0.217362051 |
| ENSGALG00010005059 | 0.318125278 | 0.24495276  |
| ENSGALG00010005060 | 0.945844433 | 0.256429957 |
| ENSGALG00010005065 | 0.288981502 | 0.129643301 |
| ENSGALG00010005066 | 0.208550923 | 0.676301294 |
| ENSGALG00010005067 | 0.879798351 | 0.411142898 |
| ENSGALG00010005068 | 0.03905123  | 0.19025897  |
| ENSGALG00010005070 | 0.993638264 | 0.340949363 |
| ENSGALG00010005071 | 0.474937178 | 0.127997944 |
| ENSGALG00010005074 | 0.232556738 | 0.155960133 |
| ENSGALG00010005075 | 0.992582522 | 0.329129347 |
| ENSGALG00010005077 | 0.942846699 | 0.231466575 |
| ENSGALG00010005078 | 0.725649145 | 0.03548861  |
| ENSGALG00010005081 | 0.968865038 | 0.313976076 |
| ENSGALG00010005082 | 0.623533981 | 0.141022664 |

|                    |             |             |
|--------------------|-------------|-------------|
| ENSGALG00010005087 | 0.816709826 | 0.361366931 |
| ENSGALG00010005089 | 0.469200733 | 0.033817945 |
| ENSGALG00010005091 | 0.377042884 | 0.132366957 |
| ENSGALG00010005092 | 0.972842589 | 0.298999635 |
| ENSGALG00010005094 | 0.92050264  | 0.3524121   |
| ENSGALG00010005098 | 0.051606007 | 0.145348651 |
| ENSGALG00010005102 | 0.080299204 | 0.172274854 |
| ENSGALG00010005104 | 0.965263158 | 0.291604322 |
| ENSGALG00010005105 | 0.763720975 | 0.239294538 |
| ENSGALG00010005107 | 0.858849377 | 0.239827177 |
| ENSGALG00010005109 | 0.944184347 | 0.330036581 |
| ENSGALG00010005110 | 0.466796891 | 0.167433006 |
| ENSGALG00010005111 | 0.949626526 | 0.471235323 |
| ENSGALG00010005114 | 0.972829538 | 0.310834753 |
| ENSGALG00010005116 | 0.505026024 | 0.219416157 |
| ENSGALG00010005118 | 0.922385647 | 0.212460167 |
| ENSGALG00010005119 | 0.865117782 | 0.376592824 |
| ENSGALG00010005120 | 0.485483307 | 0.218572055 |
| ENSGALG00010005122 | 0.431214145 | 0.153450729 |
| ENSGALG00010005123 | 0.981835078 | 0.329742962 |
| ENSGALG00010005124 | 0.389047419 | 0.16978754  |
| ENSGALG00010005125 | 0.445399567 | 0.012857239 |
| ENSGALG00010005126 | 0.886881923 | 0.395489898 |
| ENSGALG00010005127 | 0.976861834 | 0.283390849 |
| ENSGALG00010005128 | 0.39144912  | 0.115895902 |
| ENSGALG00010005130 | 0.522993441 | 0.138952057 |
| ENSGALG00010005131 | 0.972573222 | 0.260859511 |
| ENSGALG00010005132 | 0.704071035 | 0.263464689 |
| ENSGALG00010005140 | 0.901394401 | 0.297012513 |
| ENSGALG00010005141 | 0.172449586 | 0.077272984 |
| ENSGALG00010005143 | 0.762131146 | 0.027792577 |
| ENSGALG00010005145 | 0.984470688 | 0.328458763 |
| ENSGALG00010005146 | 0.959895761 | 0.291419781 |
| ENSGALG00010005148 | 0.82917662  | 0.523740647 |
| ENSGALG00010005149 | 0.003921305 | 0.249095559 |
| ENSGALG00010005150 | 0.566867179 | 0.335817644 |
| ENSGALG00010005151 | 0.378022522 | 0.12438851  |
| ENSGALG00010005152 | 0.251259112 | 0.234738059 |
| ENSGALG00010005154 | 0.667675483 | 0.125359552 |
| ENSGALG00010005157 | 0.767918663 | 0.320605349 |
| ENSGALG00010005158 | 0.944981329 | 0.328198901 |
| ENSGALG00010005159 | 0.937971762 | 0.283172079 |
| ENSGALG00010005160 | 0.431245048 | 0.315691019 |
| ENSGALG00010005162 | 0.125880024 | 0.205619727 |
| ENSGALG00010005163 | 0.373234341 | 0.177459231 |
| ENSGALG00010005164 | 0.218496484 | 0.2357475   |
| ENSGALG00010005165 | 0.980902774 | 0.286360141 |
| ENSGALG00010005166 | 0.79650625  | 0.082726199 |
| ENSGALG00010005167 | 0.081651617 | 0.049902913 |
| ENSGALG00010005170 | 0.676268157 | 0.194057163 |
| ENSGALG00010005171 | 0.699696558 | 0.42205719  |
| ENSGALG00010005172 | 0.928540405 | 0.331446335 |
| ENSGALG00010005173 | 0.073404375 | 0.575118526 |
| ENSGALG00010005174 | 0.971184689 | 0.313782843 |
| ENSGALG00010005176 | 0.982036056 | 0.423942711 |
| ENSGALG00010005177 | 0.903555854 | 0.302517082 |

|                    |             |             |
|--------------------|-------------|-------------|
| ENSGALG00010005178 | 0.051894818 | 0.262579457 |
| ENSGALG00010005179 | 0.562488715 | 0.211240742 |
| ENSGALG00010005180 | 0.81879065  | 0.24982751  |
| ENSGALG00010005181 | 0.685979028 | 0.109933597 |
| ENSGALG00010005182 | 0.341478699 | 0.209601186 |
| ENSGALG00010005184 | 0.642196575 | 0.24997015  |
| ENSGALG00010005185 | 0.843889951 | 0.236207376 |
| ENSGALG00010005186 | 0.955902659 | 0.323862955 |
| ENSGALG00010005187 | 0.307713    | 0.294125534 |
| ENSGALG00010005188 | 0.612726709 | 0.048169163 |
| ENSGALG00010005189 | 0.643537803 | 0.096199799 |
| ENSGALG00010005190 | 0.737928588 | 0.126967201 |
| ENSGALG00010005191 | 0.835825494 | 0.349596692 |
| ENSGALG00010005192 | 0.78300019  | 0.112414139 |
| ENSGALG00010005193 | 0.619077496 | 0.389424888 |
| ENSGALG00010005194 | 0.573746996 | 0.195578938 |
| ENSGALG00010005195 | 0.676568007 | 0.265320462 |
| ENSGALG00010005197 | 0.59406642  | 0.166454434 |
| ENSGALG00010005198 | 0.353738159 | 0.15397171  |
| ENSGALG00010005199 | 0.997260081 | 0.336351736 |
| ENSGALG00010005200 | 0.744629188 | 0.235307353 |
| ENSGALG00010005201 | 0.489069206 | 0.169905043 |
| ENSGALG00010005202 | 0.243417503 | 0.31053392  |
| ENSGALG00010005203 | 0.912606687 | 0.228682395 |
| ENSGALG00010005204 | 0.660464968 | 0.51833889  |
| ENSGALG00010005206 | 0.370622167 | 0.730060946 |
| ENSGALG00010005208 | 0.881508178 | 0.175951884 |
| ENSGALG00010005209 | 0.621326583 | 0.326420628 |
| ENSGALG00010005210 | 0.719828229 | 0.29939544  |
| ENSGALG00010005211 | 0.4463046   | 0.152148195 |
| ENSGALG00010005212 | 0.725691292 | 0.080657886 |
| ENSGALG00010005213 | 0.784772795 | 0.324730227 |
| ENSGALG00010005214 | 0.269310992 | 0.099788613 |
| ENSGALG00010005215 | 0.911095544 | 0.215972216 |
| ENSGALG00010005216 | 0.564738715 | 0.028410167 |
| ENSGALG00010005217 | 0.459333435 | 0.263238616 |
| ENSGALG00010005218 | 0.566408275 | 0.321741097 |
| ENSGALG00010005219 | 0.647911413 | 0.350599433 |
| ENSGALG00010005220 | 0.597544665 | 0.108515763 |
| ENSGALG00010005221 | 0.941561195 | 0.311428757 |
| ENSGALG00010005222 | 0.989530915 | 0.336109853 |
| ENSGALG00010005223 | 0.580108305 | 0.040586496 |
| ENSGALG00010005224 | 0.678782611 | 0.227370099 |
| ENSGALG00010005226 | 0.895802339 | 0.31647642  |
| ENSGALG00010005227 | 0.878703395 | 0.34964241  |
| ENSGALG00010005228 | 0.647482362 | 0.424029727 |
| ENSGALG00010005229 | 0.560170443 | 0.187211213 |
| ENSGALG00010005231 | 0.679628435 | 0.036683545 |
| ENSGALG00010005232 | 0.819522866 | 0.37312732  |
| ENSGALG00010005233 | 0.419623546 | 0.557771527 |
| ENSGALG00010005236 | 0.799222648 | 0.391965621 |
| ENSGALG00010005237 | 0.762981243 | 0.184856224 |
| ENSGALG00010005238 | 0.930915504 | 0.311877557 |
| ENSGALG00010005239 | 0.928115552 | 0.32192057  |
| ENSGALG00010005240 | 0.113349306 | 0.226412826 |
| ENSGALG00010005241 | 0.955611001 | 0.268814401 |

|                    |             |             |
|--------------------|-------------|-------------|
| ENSGALG00010005242 | 0.947210674 | 0.394864653 |
| ENSGALG00010005243 | 0.030798317 | 0.351380107 |
| ENSGALG00010005244 | 0.63863652  | 0.477720478 |
| ENSGALG00010005245 | 0.948181378 | 0.362094619 |
| ENSGALG00010005246 | 0.858208548 | 0.314941576 |
| ENSGALG00010005247 | 0.773946538 | 0.349851281 |
| ENSGALG00010005248 | 0.860618002 | 0.2798435   |
| ENSGALG00010005249 | 0.961227447 | 0.369544553 |
| ENSGALG00010005250 | 0.958499348 | 0.42244381  |
| ENSGALG00010005251 | 0.052545293 | 0.138312166 |
| ENSGALG00010005252 | 0.941272003 | 0.213445491 |
| ENSGALG00010005253 | 0.475243611 | 0.358195905 |
| ENSGALG00010005254 | 0.594998295 | 0.306261579 |
| ENSGALG00010005255 | 0.996534916 | 0.301095703 |
| ENSGALG00010005256 | 0.744100566 | 0.243016325 |
| ENSGALG00010005257 | 0.753907094 | 0.215494126 |
| ENSGALG00010005258 | 0.444724743 | 0.060021854 |
| ENSGALG00010005259 | 0.979417708 | 0.357896985 |
| ENSGALG00010005260 | 0.974748175 | 0.250636201 |
| ENSGALG00010005261 | 0.348799145 | 0.040260592 |
| ENSGALG00010005262 | 0.953514751 | 0.418598734 |
| ENSGALG00010005263 | 0.674947555 | 0.275621772 |
| ENSGALG00010005264 | 0.99561496  | 0.32699766  |
| ENSGALG00010005265 | 0.699630301 | 0.27445769  |
| ENSGALG00010005266 | 0.781489041 | 0.264598873 |
| ENSGALG00010005267 | 0.949138691 | 0.306101448 |
| ENSGALG00010005268 | 0.983724059 | 0.344396328 |
| ENSGALG00010005269 | 0.996334993 | 0.341659489 |
| ENSGALG00010005270 | 0.961580168 | 0.265958762 |
| ENSGALG00010005271 | 0.647720279 | 0.198313355 |
| ENSGALG00010005272 | 0.956988143 | 0.324367265 |
| ENSGALG00010005273 | 0.767290434 | 0.170026813 |
| ENSGALG00010005274 | 0.804109369 | 0.304150692 |
| ENSGALG00010005275 | 0.630601896 | 0.21667994  |
| ENSGALG00010005276 | 0.396668506 | 0.181671381 |
| ENSGALG00010005277 | 0.916223179 | 0.263610609 |
| ENSGALG00010005278 | 0.551769667 | 0.120913483 |
| ENSGALG00010005279 | 0.792590588 | 0.229760271 |
| ENSGALG00010005280 | 0.050564    | 0.120729262 |
| ENSGALG00010005281 | 0.876759014 | 0.428036709 |
| ENSGALG00010005282 | 0.614730899 | 0.052177339 |
| ENSGALG00010005283 | 0.856541634 | 0.266545848 |
| ENSGALG00010005284 | 0.534976018 | 0.296709269 |
| ENSGALG00010005285 | 0.908139504 | 0.246570428 |
| ENSGALG00010005286 | 0.333361666 | 0.242868776 |
| ENSGALG00010005287 | 0.068703172 | 0.161634517 |
| ENSGALG00010005288 | 0.078489461 | 0.081967578 |
| ENSGALG00010005290 | 0.669366594 | 0.392789746 |
| ENSGALG00010005291 | 0.981904398 | 0.320088319 |
| ENSGALG00010005292 | 0.921388277 | 0.420503334 |
| ENSGALG00010005293 | 0.950998526 | 0.247491043 |
| ENSGALG00010005294 | 0.054343211 | 0.202346398 |
| ENSGALG00010005295 | 0.633236512 | 0.265609694 |
| ENSGALG00010005296 | 0.891858939 | 0.379584369 |
| ENSGALG00010005297 | 0.914904933 | 0.341837359 |
| ENSGALG00010005298 | 0.82433745  | 0.316038466 |



|                    |             |             |
|--------------------|-------------|-------------|
| ENSGALG00010005299 | 0.285513734 | 0.24313624  |
| ENSGALG00010005300 | 0.385376427 | 0.119512257 |
| ENSGALG00010005301 | 0.441573517 | 0.414688391 |
| ENSGALG00010005302 | 0.793341391 | 0.308676516 |
| ENSGALG00010005303 | 0.766288009 | 0.151639653 |
| ENSGALG00010005304 | 0.681188867 | 0.121580011 |
| ENSGALG00010005305 | 0.892107251 | 0.331564228 |
| ENSGALG00010005306 | 0.885512372 | 0.24357376  |
| ENSGALG00010005307 | 0.45545821  | 0.216724458 |
| ENSGALG00010005308 | 0.655908444 | 0.258819716 |
| ENSGALG00010005309 | 0.768453274 | 0.329109875 |
| ENSGALG00010005310 | 0.830484504 | 0.261220371 |
| ENSGALG00010005311 | 0.855544503 | 0.364903643 |
| ENSGALG00010005312 | 0.49646521  | 0.048859621 |
| ENSGALG00010005313 | 0.906665914 | 0.522767783 |
| ENSGALG00010005314 | 0.992004286 | 0.299727743 |
| ENSGALG00010005315 | 0.72050549  | 0.166964879 |
| ENSGALG00010005316 | 0.845287337 | 0.405042769 |
| ENSGALG00010005317 | 0.914706738 | 0.324900577 |
| ENSGALG00010005318 | 0.414147668 | 0.085536883 |
| ENSGALG00010005319 | 0.381608622 | 0.094262957 |
| ENSGALG00010005320 | 0.852350785 | 0.091455654 |
| ENSGALG00010005321 | 0.750643739 | 0.626231772 |
| ENSGALG00010005322 | 0.369879257 | 0.006047186 |
| ENSGALG00010005323 | 0.598021733 | 0.249182215 |
| ENSGALG00010005324 | 0.454000726 | 0.009048199 |
| ENSGALG00010005326 | 0.478051733 | 0.062151187 |
| ENSGALG00010005328 | 0.457160252 | 0.114267555 |
| ENSGALG00010005329 | 0.873624921 | 0.353719528 |
| ENSGALG00010005330 | 0.839230805 | 0.39981102  |
| ENSGALG00010005332 | 0.653383458 | 0.249659553 |
| ENSGALG00010005333 | 0.846732755 | 0.282913344 |
| ENSGALG00010005334 | 0.631049184 | 0.034362807 |
| ENSGALG00010005335 | 0.956871316 | 0.277770451 |
| ENSGALG00010005336 | 0.940518553 | 0.41164813  |
| ENSGALG00010005338 | 0.721732976 | 0.267652543 |
| ENSGALG00010005340 | 0.279834744 | 0.382907809 |
| ENSGALG00010005341 | 0.869385879 | 0.465907346 |
| ENSGALG00010005342 | 0.855617827 | 0.294717196 |
| ENSGALG00010005344 | 0.441581065 | 0.208199336 |
| ENSGALG00010005345 | 0.337616669 | 0.113534786 |
| ENSGALG00010005346 | 0.894016229 | 0.174856124 |
| ENSGALG00010005347 | 0.919114727 | 0.32595725  |
| ENSGALG00010005348 | 0.832455513 | 0.443649825 |
| ENSGALG00010005349 | 0.894050226 | 0.306967766 |
| ENSGALG00010005350 | 0.112822493 | 0.03666474  |
| ENSGALG00010005351 | 0.986892437 | 0.297766597 |
| ENSGALG00010005352 | 0.876543908 | 0.440225401 |
| ENSGALG00010005353 | 0.968204022 | 0.273931206 |
| ENSGALG00010005354 | 0.861474633 | 0.317371034 |
| ENSGALG00010005355 | 0.961812664 | 0.422227829 |
| ENSGALG00010005356 | 0.779054561 | 0.325371069 |
| ENSGALG00010005357 | 0.881650056 | 0.327814332 |
| ENSGALG00010005358 | 0.894923444 | 0.318861496 |
| ENSGALG00010005359 | 0.840184367 | 0.143961305 |
| ENSGALG00010005360 | 0.937167497 | 0.399707634 |

|                    |             |             |
|--------------------|-------------|-------------|
| ENSGALG00010005361 | 0.765104514 | 0.552504583 |
| ENSGALG00010005362 | 0.019418185 | 0.206183982 |
| ENSGALG00010005363 | 0.875522342 | 0.253147535 |
| ENSGALG00010005364 | 0.981900039 | 0.345690909 |
| ENSGALG00010005365 | 0.054289971 | 0.14989198  |
| ENSGALG00010005366 | 0.24149414  | 0.076962543 |
| ENSGALG00010005367 | 0.920938299 | 0.273347911 |
| ENSGALG00010005368 | 0.913822824 | 0.172389073 |
| ENSGALG00010005369 | 0.825296099 | 0.424952485 |
| ENSGALG00010005370 | 0.594066093 | 0.31349955  |
| ENSGALG00010005372 | 0.602122235 | 0.116553506 |
| ENSGALG00010005373 | 0.285188268 | 0.121935808 |
| ENSGALG00010005374 | 0.492325412 | 0.18165357  |
| ENSGALG00010005375 | 0.127856628 | 0.013601694 |
| ENSGALG00010005376 | 0.853684118 | 0.276268618 |
| ENSGALG00010005377 | 0.953679061 | 0.375437072 |
| ENSGALG00010005378 | 0.880732589 | 0.367747057 |
| ENSGALG00010005379 | 0.20055635  | 0.015073068 |
| ENSGALG00010005380 | 0.926718729 | 0.332908538 |
| ENSGALG00010005381 | 0.077417792 | 0.027564508 |
| ENSGALG00010005382 | 0.953697392 | 0.271720169 |
| ENSGALG00010005383 | 0.978642357 | 0.310747449 |
| ENSGALG00010005384 | 0.98261663  | 0.402154258 |
| ENSGALG00010005385 | 0.080413327 | 0.10220662  |
| ENSGALG00010005386 | 0.673744982 | 0.237127041 |
| ENSGALG00010005387 | 0.625680907 | 0.24351295  |
| ENSGALG00010005388 | 0.870967245 | 0.276923233 |
| ENSGALG00010005389 | 0.848039329 | 0.215761186 |
| ENSGALG00010005390 | 0.229451174 | 0.308991893 |
| ENSGALG00010005391 | 0.788065329 | 0.557269037 |
| ENSGALG00010005392 | 0.960989041 | 0.264017683 |
| ENSGALG00010005393 | 0.927796522 | 0.279519461 |
| ENSGALG00010005394 | 0.323923084 | 0.022782276 |
| ENSGALG00010005395 | 0.941404249 | 0.359003395 |
| ENSGALG00010005396 | 0.8630785   | 0.123276309 |
| ENSGALG00010005397 | 0.708686073 | 0.386139568 |
| ENSGALG00010005398 | 0.888093781 | 0.146752821 |
| ENSGALG00010005399 | 0.354198248 | 0.300816078 |
| ENSGALG00010005400 | 0.524634497 | 0.016092084 |
| ENSGALG00010005401 | 0.941704533 | 0.322012905 |
| ENSGALG00010005402 | 0.765029162 | 0.289179171 |
| ENSGALG00010005403 | 0.199110738 | 0.004108869 |
| ENSGALG00010005404 | 0.819340698 | 0.328530426 |
| ENSGALG00010005405 | 0.599200738 | 0.209242185 |
| ENSGALG00010005406 | 0.114406287 | 0.312344548 |
| ENSGALG00010005407 | 0.694680469 | 0.254915639 |
| ENSGALG00010005408 | 0.931338129 | 0.29521449  |
| ENSGALG00010005409 | 0.983547607 | 0.303646315 |
| ENSGALG00010005410 | 0.234180613 | 0.13494038  |
| ENSGALG00010005411 | 0.139352043 | 0.321824924 |
| ENSGALG00010005412 | 0.300241627 | 0.570926791 |
| ENSGALG00010005413 | 0.25387471  | 0.14445058  |
| ENSGALG00010005414 | 0.272006816 | 0.288372799 |
| ENSGALG00010005415 | 0.850650345 | 0.5203502   |
| ENSGALG00010005416 | 0.98399732  | 0.310612635 |
| ENSGALG00010005417 | 0.902896069 | 0.36694735  |

|                    |             |             |
|--------------------|-------------|-------------|
| ENSGALG00010005418 | 0.609409188 | 0.150921349 |
| ENSGALG00010005419 | 0.936029666 | 0.278059122 |
| ENSGALG00010005420 | 0.864434114 | 0.322774607 |
| ENSGALG00010005421 | 0.844892436 | 0.315570748 |
| ENSGALG00010005422 | 0.676478816 | 0.361322719 |
| ENSGALG00010005423 | 0.982996126 | 0.350330527 |
| ENSGALG00010005424 | 0.969344418 | 0.312622577 |
| ENSGALG00010005425 | 0.925133561 | 0.385702329 |
| ENSGALG00010005426 | 0.85564399  | 0.172033778 |
| ENSGALG00010005427 | 0.956104639 | 0.354091958 |
| ENSGALG00010005428 | 0.22285664  | 0.257372557 |
| ENSGALG00010005429 | 0.887142738 | 0.315445961 |
| ENSGALG00010005430 | 0.116807251 | 0.060277794 |
| ENSGALG00010005431 | 0.078311903 | 0.375121149 |
| ENSGALG00010005432 | 0.137667049 | 0.280594582 |
| ENSGALG00010005433 | 0.910170746 | 0.16410947  |
| ENSGALG00010005434 | 0.217386736 | 0.147437101 |
| ENSGALG00010005435 | 0.495297326 | 0.006843784 |
| ENSGALG00010005436 | 0.795639965 | 0.468247134 |
| ENSGALG00010005437 | 0.981702318 | 0.370809791 |
| ENSGALG00010005438 | 0.786925702 | 0.284773268 |
| ENSGALG00010005439 | 0.525297352 | 0.067449141 |
| ENSGALG00010005440 | 0.717565814 | 0.1253265   |
| ENSGALG00010005441 | 0.973369404 | 0.261769605 |
| ENSGALG00010005442 | 0.806316823 | 0.202879775 |
| ENSGALG00010005443 | 0.732865412 | 0.138269862 |
| ENSGALG00010005444 | 0.98318568  | 0.376944435 |
| ENSGALG00010005445 | 0.990758295 | 0.345408511 |
| ENSGALG00010005446 | 0.423517453 | 0.213001248 |
| ENSGALG00010005447 | 0.535739628 | 0.241621526 |
| ENSGALG00010005448 | 0.971474995 | 0.31394628  |
| ENSGALG00010005449 | 0.905801918 | 0.360906373 |
| ENSGALG00010005450 | 0.852142719 | 0.221568861 |
| ENSGALG00010005452 | 0.876784176 | 0.354899468 |
| ENSGALG00010005453 | 0.796328743 | 0.051801114 |
| ENSGALG00010005454 | 0.236364906 | 0.543169529 |
| ENSGALG00010005455 | 0.879640251 | 0.340822712 |
| ENSGALG00010005456 | 0.706047603 | 0.352091944 |
| ENSGALG00010005457 | 0.234124422 | 0.241621045 |
| ENSGALG00010005458 | 0.158747102 | 0.01655308  |
| ENSGALG00010005459 | 0.398334376 | 0.151074837 |
| ENSGALG00010005460 | 0.978540703 | 0.367333778 |
| ENSGALG00010005461 | 0.217013836 | 0.193799607 |
| ENSGALG00010005462 | 0.466491776 | 0.001914512 |
| ENSGALG00010005463 | 0.713743737 | 0.321493611 |
| ENSGALG00010005464 | 0.98901332  | 0.302295735 |
| ENSGALG00010005465 | 0.031969973 | 0.155291033 |
| ENSGALG00010005466 | 0.793765562 | 0.290956327 |
| ENSGALG00010005467 | 0.964745725 | 0.280006094 |
| ENSGALG00010005468 | 0.883418534 | 0.441278993 |
| ENSGALG00010005469 | 0.039849486 | 0.174398509 |
| ENSGALG00010005470 | 0.846518338 | 0.523180354 |
| ENSGALG00010005471 | 0.647474012 | 0.24304038  |
| ENSGALG00010005472 | 0.272510887 | 0.024748777 |
| ENSGALG00010005473 | 0.292462411 | 0.020335823 |
| ENSGALG00010005474 | 0.190972861 | 0.412756245 |

|                    |             |             |
|--------------------|-------------|-------------|
| ENSGALG00010005475 | 0.981885698 | 0.292488591 |
| ENSGALG00010005476 | 0.098088661 | 0.454318358 |
| ENSGALG00010005477 | 0.888870221 | 0.183366834 |
| ENSGALG00010005478 | 0.979019383 | 0.37345942  |
| ENSGALG00010005479 | 0.55481494  | 0.17434458  |
| ENSGALG00010005480 | 0.647295531 | 0.285801076 |
| ENSGALG00010005481 | 0.257102694 | 0.137180099 |
| ENSGALG00010005482 | 0.247350771 | 0.241123882 |
| ENSGALG00010005483 | 0.219563083 | 0.229706133 |
| ENSGALG00010005484 | 0.963460137 | 0.360807821 |
| ENSGALG00010005485 | 0.467903358 | 0.338853674 |
| ENSGALG00010005486 | 0.896831293 | 0.349982471 |
| ENSGALG00010005487 | 0.862410947 | 0.291739761 |
| ENSGALG00010005488 | 0.856927229 | 0.464019617 |
| ENSGALG00010005489 | 0.813184718 | 0.061795886 |
| ENSGALG00010005490 | 0.823787534 | 0.259539648 |
| ENSGALG00010005491 | 0.949287619 | 0.290355404 |
| ENSGALG00010005492 | 0.987128089 | 0.339043122 |
| ENSGALG00010005493 | 0.301742166 | 0.414259336 |
| ENSGALG00010005494 | 0.986056045 | 0.353384917 |
| ENSGALG00010005495 | 0.94758736  | 0.206134736 |
| ENSGALG00010005496 | 0.341056803 | 0.114817382 |
| ENSGALG00010005497 | 0.85425295  | 0.31110155  |
| ENSGALG00010005498 | 0.982103366 | 0.321211675 |
| ENSGALG00010005499 | 0.640081355 | 0.369907805 |
| ENSGALG00010005500 | 0.540057705 | 0.49526768  |
| ENSGALG00010005501 | 0.979858615 | 0.334628691 |
| ENSGALG00010005502 | 0.824283975 | 0.446624232 |
| ENSGALG00010005503 | 0.659752926 | 0.090135322 |
| ENSGALG00010005504 | 0.959111281 | 0.36047214  |
| ENSGALG00010005505 | 0.247363671 | 0.263819475 |
| ENSGALG00010005506 | 0.662169108 | 0.286248679 |
| ENSGALG00010005507 | 0.836163239 | 0.337545776 |
| ENSGALG00010005508 | 0.966090153 | 0.231421068 |
| ENSGALG00010005509 | 0.990189568 | 0.330153652 |
| ENSGALG00010005510 | 0.976162688 | 0.385754984 |
| ENSGALG00010005511 | 0.96491049  | 0.411775748 |
| ENSGALG00010005512 | 0.89490161  | 0.473798038 |
| ENSGALG00010005513 | 0.920781244 | 0.302982245 |
| ENSGALG00010005514 | 0.986660468 | 0.303227959 |
| ENSGALG00010005515 | 0.884298313 | 0.255381127 |
| ENSGALG00010005516 | 0.453602912 | 0.017072357 |
| ENSGALG00010005517 | 0.723669342 | 0.321387166 |
| ENSGALG00010005518 | 0.985095918 | 0.354962488 |
| ENSGALG00010005519 | 0.439976527 | 0.070533118 |
| ENSGALG00010005520 | 0.284227058 | 0.103920777 |
| ENSGALG00010005521 | 0.929300458 | 0.426899277 |
| ENSGALG00010005522 | 0.989935771 | 0.340853549 |
| ENSGALG00010005523 | 0.683096062 | 0.202273709 |
| ENSGALG00010005524 | 0.954468375 | 0.280698448 |
| ENSGALG00010005526 | 0.966626135 | 0.297100482 |
| ENSGALG00010005527 | 0.674385302 | 0.191755791 |
| ENSGALG00010005529 | 0.667530828 | 0.321133204 |
| ENSGALG00010005530 | 0.972071117 | 0.326374182 |
| ENSGALG00010005531 | 0.959654298 | 0.290067221 |
| ENSGALG00010005532 | 0.787053903 | 0.16101926  |

|                    |             |             |
|--------------------|-------------|-------------|
| ENSGALG00010005533 | 0.699468249 | 0.313055403 |
| ENSGALG00010005534 | 0.965827276 | 0.292507209 |
| ENSGALG00010005535 | 0.91545416  | 0.240681666 |
| ENSGALG00010005536 | 0.339465031 | 0.216660977 |
| ENSGALG00010005537 | 0.857813753 | 0.251285682 |
| ENSGALG00010005538 | 0.586719176 | 0.271806719 |
| ENSGALG00010005539 | 0.521720198 | 0.252281033 |
| ENSGALG00010005540 | 0.994047896 | 0.323695065 |
| ENSGALG00010005541 | 0.654372905 | 0.156421285 |
| ENSGALG00010005542 | 0.651459421 | 0.236593159 |
| ENSGALG00010005543 | 0.926196199 | 0.267846421 |
| ENSGALG00010005544 | 0.989405268 | 0.326828763 |
| ENSGALG00010005545 | 0.92172622  | 0.252897434 |
| ENSGALG00010005546 | 0.983459132 | 0.311159888 |
| ENSGALG00010005547 | 0.889939873 | 0.469711805 |
| ENSGALG00010005548 | 0.555682581 | 0.022625516 |
| ENSGALG00010005549 | 0.955379287 | 0.326579382 |
| ENSGALG00010005550 | 0.734158342 | 0.247671716 |
| ENSGALG00010005551 | 0.16811112  | 0.346045403 |
| ENSGALG00010005552 | 0.844417309 | 0.415210988 |
| ENSGALG00010005553 | 0.990682039 | 0.301857327 |
| ENSGALG00010005554 | 0.097545227 | 0.139654523 |
| ENSGALG00010005555 | 0.42035714  | 0.209949832 |
| ENSGALG00010005556 | 0.995990248 | 0.336475553 |
| ENSGALG00010005557 | 0.754736875 | 0.1401165   |
| ENSGALG00010005558 | 0.84816026  | 0.178077538 |
| ENSGALG00010005559 | 0.961477111 | 0.285647053 |
| ENSGALG00010005560 | 0.773531776 | 0.286528187 |
| ENSGALG00010005561 | 0.622339285 | 0.065100742 |
| ENSGALG00010005562 | 0.737330584 | 0.180875506 |
| ENSGALG00010005564 | 0.983493747 | 0.36175527  |
| ENSGALG00010005565 | 0.977183384 | 0.251694196 |
| ENSGALG00010005566 | 0.015922281 | 0.12649853  |
| ENSGALG00010005567 | 0.6819521   | 0.548693021 |
| ENSGALG00010005568 | 0.632701716 | 0.02523601  |
| ENSGALG00010005571 | 0.265540773 | 0.258640441 |
| ENSGALG00010005572 | 0.986283282 | 0.348933301 |
| ENSGALG00010005573 | 0.927120836 | 0.319532236 |
| ENSGALG00010005574 | 0.991745728 | 0.333868878 |
| ENSGALG00010005575 | 0.597415573 | 0.128687172 |
| ENSGALG00010005578 | 0.064553866 | 0.046527695 |
| ENSGALG00010005581 | 0.044418695 | 0.451480948 |
| ENSGALG00010005582 | 0.214288333 | 0.164706724 |
| ENSGALG00010005583 | 0.989729831 | 0.329375614 |
| ENSGALG00010005585 | 0.880899382 | 0.334435138 |
| ENSGALG00010005587 | 0.475576833 | 0.295967887 |
| ENSGALG00010005588 | 0.008178884 | 0.225908097 |
| ENSGALG00010005590 | 0.30132941  | 0.077999125 |
| ENSGALG00010005593 | 0.708508783 | 0.233166817 |
| ENSGALG00010005594 | 0.966825767 | 0.273739547 |
| ENSGALG00010005596 | 0.946734838 | 0.284558538 |
| ENSGALG00010005597 | 0.712836903 | 0.23293836  |
| ENSGALG00010005600 | 0.901147643 | 0.349391302 |
| ENSGALG00010005601 | 0.348997163 | 0.18871309  |
| ENSGALG00010005602 | 0.299722474 | 0.126577591 |
| ENSGALG00010005604 | 0.865182059 | 0.317793863 |

|                    |             |             |
|--------------------|-------------|-------------|
| ENSGALG00010005605 | 0.180499089 | 0.190324653 |
| ENSGALG00010005608 | 0.461005186 | 0.187426455 |
| ENSGALG00010005609 | 0.781481179 | 0.348314678 |
| ENSGALG00010005610 | 0.046603161 | 0.319673736 |
| ENSGALG00010005612 | 0.591651591 | 0.197429027 |
| ENSGALG00010005613 | 0.651805195 | 0.251364429 |
| ENSGALG00010005617 | 0.092581875 | 0.049231578 |
| ENSGALG00010005618 | 0.08305758  | 0.029370107 |
| ENSGALG00010005619 | 0.85327717  | 0.231830808 |
| ENSGALG00010005621 | 0.758270424 | 0.025062405 |
| ENSGALG00010005624 | 0.292709036 | 0.327963953 |
| ENSGALG00010005629 | 0.148955122 | 0.296952365 |
| ENSGALG00010005630 | 0.936438436 | 0.245193128 |
| ENSGALG00010005631 | 0.59648293  | 0.195715183 |
| ENSGALG00010005632 | 0.671437704 | 0.407591201 |
| ENSGALG00010005634 | 0.913011927 | 0.350166478 |
| ENSGALG00010005636 | 0.554110885 | 0.40856543  |
| ENSGALG00010005637 | 0.437129415 | 0.239904049 |
| ENSGALG00010005639 | 0.266137114 | 0.107784983 |
| ENSGALG00010005641 | 0.734242176 | 0.104776545 |
| ENSGALG00010005645 | 0.967793081 | 0.236081198 |
| ENSGALG00010005649 | 0.595875915 | 0.389124502 |
| ENSGALG00010005650 | 0.577256167 | 0.173504072 |
| ENSGALG00010005651 | 0.817842349 | 0.053112203 |
| ENSGALG00010005656 | 0.976985141 | 0.298853917 |
| ENSGALG00010005658 | 0.009812001 | 0.5166245   |
| ENSGALG00010005659 | 0.578772447 | 0.155042686 |
| ENSGALG00010005660 | 0.951857356 | 0.342680626 |
| ENSGALG00010005664 | 0.653197339 | 0.136806212 |
| ENSGALG00010005665 | 0.896024454 | 0.32372595  |
| ENSGALG00010005666 | 0.207235825 | 0.237121127 |
| ENSGALG00010005667 | 0.277566769 | 0.107857127 |
| ENSGALG00010005668 | 0.451280892 | 0.147355642 |
| ENSGALG00010005670 | 0.932077759 | 0.286716332 |
| ENSGALG00010005672 | 0.788797428 | 0.213787969 |
| ENSGALG00010005673 | 0.779723691 | 0.284200727 |
| ENSGALG00010005674 | 0.818724459 | 0.387027169 |
| ENSGALG00010005675 | 0.798991511 | 0.038998737 |
| ENSGALG00010005676 | 0.65325985  | 0.181296045 |
| ENSGALG00010005677 | 0.472681523 | 0.144293074 |
| ENSGALG00010005678 | 0.855081866 | 0.282532408 |
| ENSGALG00010005679 | 0.51461622  | 0.355074395 |
| ENSGALG00010005680 | 0.67000677  | 0.260718086 |
| ENSGALG00010005681 | 0.013239249 | 0.160953236 |
| ENSGALG00010005682 | 0.48171383  | 0.64825227  |
| ENSGALG00010005683 | 0.632843377 | 0.132522461 |
| ENSGALG00010005684 | 0.37984072  | 0.108385122 |
| ENSGALG00010005686 | 0.814753173 | 0.272769261 |
| ENSGALG00010005688 | 0.832749871 | 0.221790294 |
| ENSGALG00010005689 | 0.876158238 | 0.41684929  |
| ENSGALG00010005691 | 0.59008763  | 0.190354068 |
| ENSGALG00010005692 | 0.16571413  | 0.064643912 |
| ENSGALG00010005693 | 0.931565742 | 0.26463072  |
| ENSGALG00010005694 | 0.940765493 | 0.107131484 |
| ENSGALG00010005695 | 0.554864574 | 0.136202294 |
| ENSGALG00010005696 | 0.379349827 | 0.099230569 |

|                    |             |             |
|--------------------|-------------|-------------|
| ENSGALG00010005698 | 0.382985366 | 0.1291087   |
| ENSGALG00010005699 | 0.907930069 | 0.323307578 |
| ENSGALG00010005700 | 0.48904219  | 0.192561417 |
| ENSGALG00010005701 | 0.064253469 | 0.10917019  |
| ENSGALG00010005702 | 0.024374485 | 0.442743073 |
| ENSGALG00010005704 | 0.990383142 | 0.365144562 |
| ENSGALG00010005705 | 0.12917798  | 0.468639813 |
| ENSGALG00010005706 | 0.203991683 | 0.058221925 |
| ENSGALG00010005708 | 0.950518469 | 0.362359193 |
| ENSGALG00010005711 | 0.598892571 | 0.174457186 |
| ENSGALG00010005712 | 0.940024552 | 0.34013903  |
| ENSGALG00010005714 | 0.771432784 | 0.341442311 |
| ENSGALG00010005716 | 0.845555136 | 0.403237465 |
| ENSGALG00010005718 | 0.423838815 | 0.20565106  |
| ENSGALG00010005720 | 0.606315696 | 0.188399197 |
| ENSGALG00010005724 | 0.861306783 | 0.286217845 |
| ENSGALG00010005725 | 0.140920444 | 0.15530806  |
| ENSGALG00010005726 | 0.672460482 | 0.187654448 |
| ENSGALG00010005735 | 0.100771311 | 0.166487866 |
| ENSGALG00010005737 | 0.921446862 | 0.302608552 |
| ENSGALG00010005739 | 0.986093867 | 0.326282035 |
| ENSGALG00010005740 | 0.873716518 | 0.173006372 |
| ENSGALG00010005741 | 0.929592794 | 0.295114434 |
| ENSGALG00010005742 | 0.869219613 | 0.192508054 |
| ENSGALG00010005743 | 0.339894371 | 0.217479104 |
| ENSGALG00010005744 | 0.677640935 | 0.312680608 |
| ENSGALG00010005746 | 0.928729915 | 0.296595248 |
| ENSGALG00010005748 | 0.961467009 | 0.216287015 |
| ENSGALG00010005749 | 0.484242833 | 0.130180432 |
| ENSGALG00010005752 | 0.716453694 | 0.52926132  |
| ENSGALG00010005754 | 0.633552207 | 0.362373486 |
| ENSGALG00010005755 | 0.928077045 | 0.350938284 |
| ENSGALG00010005756 | 0.289194983 | 0.292805799 |
| ENSGALG00010005757 | 0.919351839 | 0.307679221 |
| ENSGALG00010005758 | 0.682249881 | 0.292503445 |
| ENSGALG00010005759 | 0.423134054 | 0.242702369 |
| ENSGALG00010005760 | 0.527293542 | 0.201548719 |
| ENSGALG00010005762 | 0.295081293 | 0.447565639 |
| ENSGALG00010005763 | 0.956278607 | 0.313158551 |
| ENSGALG00010005765 | 0.528378417 | 0.039281071 |
| ENSGALG00010005766 | 0.541033981 | 0.011729272 |
| ENSGALG00010005767 | 0.829925237 | 0.223645557 |
| ENSGALG00010005768 | 0.49600362  | 0.262272631 |
| ENSGALG00010005769 | 0.071572107 | 0.054231037 |
| ENSGALG00010005771 | 0.503056376 | 0.168109625 |
| ENSGALG00010005772 | 0.944213696 | 0.374201224 |
| ENSGALG00010005777 | 0.244713592 | 0.309089016 |
| ENSGALG00010005778 | 0.714500037 | 0.00986036  |
| ENSGALG00010005779 | 0.667420574 | 0.253459447 |
| ENSGALG00010005780 | 0.399574883 | 0.154317703 |
| ENSGALG00010005781 | 0.024209848 | 0.019981473 |
| ENSGALG00010005782 | 0.238107881 | 0.178001475 |
| ENSGALG00010005784 | 0.344430818 | 0.006237626 |
| ENSGALG00010005785 | 0.659049579 | 0.187770345 |
| ENSGALG00010005786 | 0.66874296  | 0.277565524 |
| ENSGALG00010005787 | 0.989273536 | 0.339824662 |

|                    |             |             |
|--------------------|-------------|-------------|
| ENSGALG00010005789 | 0.980148535 | 0.351521197 |
| ENSGALG00010005790 | 0.754160541 | 0.161254493 |
| ENSGALG00010005792 | 0.912702362 | 0.143679564 |
| ENSGALG00010005793 | 0.585176285 | 0.235767836 |
| ENSGALG00010005794 | 0.569043619 | 0.197196766 |
| ENSGALG00010005795 | 0.115460095 | 0.045732271 |
| ENSGALG00010005796 | 0.37916021  | 0.151571387 |
| ENSGALG00010005799 | 0.894026247 | 0.257163544 |
| ENSGALG00010005800 | 0.216080084 | 0.472879241 |
| ENSGALG00010005802 | 0.420576684 | 0.263256979 |
| ENSGALG00010005803 | 0.188649845 | 0.076399714 |
| ENSGALG00010005805 | 0.319990883 | 0.456214528 |
| ENSGALG00010005809 | 0.108245516 | 0.21902547  |
| ENSGALG00010005811 | 0.426464256 | 0.079191256 |
| ENSGALG00010005813 | 0.131752732 | 0.499944108 |
| ENSGALG00010005814 | 0.676285181 | 0.163262051 |
| ENSGALG00010005816 | 0.238151512 | 0.247098185 |
| ENSGALG00010005817 | 0.931803184 | 0.209652948 |
| ENSGALG00010005818 | 0.308387909 | 0.133528019 |
| ENSGALG00010005819 | 0.190896405 | 0.512354093 |
| ENSGALG00010005820 | 0.990723176 | 0.289806661 |
| ENSGALG00010005821 | 0.570715239 | 0.087545795 |
| ENSGALG00010005822 | 0.805585507 | 0.403140035 |
| ENSGALG00010005823 | 0.377716751 | 0.312152712 |
| ENSGALG00010005824 | 0.265558089 | 0.028821141 |
| ENSGALG00010005825 | 0.40703223  | 0.350801379 |
| ENSGALG00010005826 | 0.680073204 | 0.203942758 |
| ENSGALG00010005827 | 0.693275535 | 0.361090318 |
| ENSGALG00010005828 | 0.851773559 | 0.23708242  |
| ENSGALG00010005829 | 0.512737105 | 0.370984544 |
| ENSGALG00010005830 | 0.892864122 | 0.294050845 |
| ENSGALG00010005831 | 0.972373005 | 0.354386248 |
| ENSGALG00010005834 | 0.853027688 | 0.200174171 |
| ENSGALG00010005836 | 0.925598423 | 0.222723    |
| ENSGALG00010005837 | 0.821191807 | 0.444551831 |
| ENSGALG00010005839 | 0.830834531 | 0.159503504 |
| ENSGALG00010005840 | 0.557265658 | 0.188164937 |
| ENSGALG00010005841 | 0.884221923 | 0.259364066 |
| ENSGALG00010005842 | 0.956824147 | 0.297068198 |
| ENSGALG00010005843 | 0.141090778 | 0.013014091 |
| ENSGALG00010005844 | 0.404167701 | 0.144831306 |
| ENSGALG00010005845 | 0.940894715 | 0.303441459 |
| ENSGALG00010005847 | 0.761451455 | 0.274873202 |
| ENSGALG00010005848 | 0.707092674 | 0.228027262 |
| ENSGALG00010005849 | 0.858612926 | 0.100441505 |
| ENSGALG00010005851 | 0.762962736 | 0.289888078 |
| ENSGALG00010005852 | 0.285188268 | 0.121935808 |
| ENSGALG00010005853 | 0.294001538 | 0.323163917 |
| ENSGALG00010005854 | 0.208275758 | 0.224105925 |
| ENSGALG00010005856 | 0.471475819 | 0.113760518 |
| ENSGALG00010005858 | 0.819101925 | 0.168676385 |
| ENSGALG00010005859 | 0.688478738 | 0.193113386 |
| ENSGALG00010005860 | 0.941139838 | 0.378225471 |
| ENSGALG00010005861 | 0.915564172 | 0.314304004 |
| ENSGALG00010005862 | 0.914096123 | 0.291947724 |
| ENSGALG00010005864 | 0.295794928 | 0.173016847 |



|                    |             |             |
|--------------------|-------------|-------------|
| ENSGALG00010005865 | 0.311651474 | 0.016715479 |
| ENSGALG00010005866 | 0.956555599 | 0.253132689 |
| ENSGALG00010005870 | 0.578958841 | 0.140949939 |
| ENSGALG00010005871 | 0.982719147 | 0.288943979 |
| ENSGALG00010005872 | 0.75453221  | 0.251282546 |
| ENSGALG00010005875 | 0.220746454 | 0.571592208 |
| ENSGALG00010005876 | 0.594079286 | 0.107156912 |
| ENSGALG00010005877 | 0.043685735 | 0.101872934 |
| ENSGALG00010005879 | 0.9750451   | 0.340478003 |
| ENSGALG00010005880 | 0.980621404 | 0.362810447 |
| ENSGALG00010005881 | 0.974038139 | 0.30538087  |
| ENSGALG00010005883 | 0.863154128 | 0.423966568 |
| ENSGALG00010005884 | 0.855853209 | 0.265245142 |
| ENSGALG00010005885 | 0.073555782 | 0.186105945 |
| ENSGALG00010005886 | 0.381023651 | 0.141101774 |
| ENSGALG00010005887 | 0.652254434 | 0.025563928 |
| ENSGALG00010005888 | 0.066854889 | 0.147160136 |
| ENSGALG00010005890 | 0.122938888 | 0.273125449 |
| ENSGALG00010005891 | 0.621804415 | 0.284390924 |
| ENSGALG00010005892 | 0.507017302 | 0.107731729 |
| ENSGALG00010005893 | 0.048870901 | 0.129966141 |
| ENSGALG00010005895 | 0.584794524 | 0.51925059  |
| ENSGALG00010005899 | 0.033674058 | 0.198328249 |
| ENSGALG00010005900 | 0.92997003  | 0.314837078 |
| ENSGALG00010005901 | 0.346419837 | 0.145755448 |
| ENSGALG00010005902 | 0.774475864 | 0.115919604 |
| ENSGALG00010005903 | 0.162806185 | 0.177050262 |
| ENSGALG00010005904 | 0.752229308 | 0.220485996 |
| ENSGALG00010005905 | 0.292042451 | 0.213684571 |
| ENSGALG00010005909 | 0.45846296  | 0.005801845 |
| ENSGALG00010005910 | 0.770883105 | 0.26109568  |
| ENSGALG00010005911 | 0.785196434 | 0.533541505 |
| ENSGALG00010005912 | 0.760306361 | 0.38477747  |
| ENSGALG00010005913 | 0.470643018 | 0.085559462 |
| ENSGALG00010005914 | 0.866628916 | 0.28055381  |
| ENSGALG00010005915 | 0.898927197 | 0.148522342 |
| ENSGALG00010005916 | 0.055219348 | 0.608449815 |
| ENSGALG00010005918 | 0.000893823 | 0.500599188 |
| ENSGALG00010005919 | 0.008134371 | 0.208550203 |
| ENSGALG00010005920 | 0.781833653 | 0.436791605 |
| ENSGALG00010005921 | 0.362898454 | 0.02098693  |
| ENSGALG00010005922 | 0.433960528 | 0.15553562  |
| ENSGALG00010005923 | 0.412100413 | 0.15218604  |
| ENSGALG00010005924 | 0.454091535 | 0.393546415 |
| ENSGALG00010005925 | 0.019583988 | 0.039177109 |
| ENSGALG00010005926 | 0.996479738 | 0.352155392 |
| ENSGALG00010005927 | 0.285272007 | 0.109169955 |
| ENSGALG00010005928 | 0.319989291 | 0.182147595 |
| ENSGALG00010005929 | 0.476200491 | 0.172173364 |
| ENSGALG00010005932 | 0.587653963 | 0.187631755 |
| ENSGALG00010005934 | 0.989309466 | 0.341185558 |
| ENSGALG00010005935 | 0.543346011 | 0.070822976 |
| ENSGALG00010005936 | 0.219386918 | 0.079388121 |
| ENSGALG00010005937 | 0.429529526 | 0.208598056 |
| ENSGALG00010005938 | 0.580510709 | 0.382332307 |
| ENSGALG00010005939 | 0.342060521 | 0.10352521  |

|                    |             |             |
|--------------------|-------------|-------------|
| ENSGALG00010005941 | 0.986477812 | 0.319062924 |
| ENSGALG00010005942 | 0.39957569  | 0.107171429 |
| ENSGALG00010005943 | 0.245455492 | 0.198023473 |
| ENSGALG00010005944 | 0.581051259 | 0.219875702 |
| ENSGALG00010005949 | 0.828194759 | 0.451780898 |
| ENSGALG00010005956 | 0.856173921 | 0.518791985 |
| ENSGALG00010005959 | 0.089765396 | 0.095692089 |
| ENSGALG00010005961 | 0.567062391 | 0.201274118 |
| ENSGALG00010005963 | 0.459491949 | 0.098918206 |
| ENSGALG00010005964 | 0.929876928 | 0.322379336 |
| ENSGALG00010005965 | 0.060762054 | 0.1387881   |
| ENSGALG00010005966 | 0.94341221  | 0.359411078 |
| ENSGALG00010005967 | 0.94098615  | 0.344283517 |
| ENSGALG00010005968 | 0.277566769 | 0.107857127 |
| ENSGALG00010005969 | 0.901126367 | 0.185988843 |
| ENSGALG00010005970 | 0.453857431 | 0.010409917 |
| ENSGALG00010005972 | 0.167624301 | 0.217536576 |
| ENSGALG00010005973 | 0.018301635 | 0.519548151 |
| ENSGALG00010005975 | 0.911773979 | 0.321989626 |
| ENSGALG00010005977 | 0.538573827 | 0.221027742 |
| ENSGALG00010005978 | 0.093261333 | 0.117949127 |
| ENSGALG00010005979 | 0.060595164 | 0.192953689 |
| ENSGALG00010005980 | 0.14258792  | 0.245291929 |
| ENSGALG00010005981 | 0.848003939 | 0.180994447 |
| ENSGALG00010005982 | 0.127989044 | 0.245086416 |
| ENSGALG00010005983 | 0.324373729 | 0.188688025 |
| ENSGALG00010005984 | 0.989871678 | 0.337798542 |
| ENSGALG00010005985 | 0.511502767 | 0.147233642 |
| ENSGALG00010005988 | 0.630192272 | 0.012286493 |
| ENSGALG00010005989 | 0.460020626 | 0.15575305  |
| ENSGALG00010005990 | 0.979636383 | 0.324029467 |
| ENSGALG00010005991 | 0.543196991 | 0.375907256 |
| ENSGALG00010005994 | 0.58031066  | 0.206650939 |
| ENSGALG00010005995 | 0.379004946 | 0.117491907 |
| ENSGALG00010005997 | 0.95632506  | 0.290358581 |
| ENSGALG00010005998 | 0.932082461 | 0.208618854 |
| ENSGALG00010005999 | 0.962153944 | 0.343873801 |
| ENSGALG00010006000 | 0.302495553 | 0.210142421 |
| ENSGALG00010006001 | 0.933318244 | 0.331196091 |
| ENSGALG00010006002 | 0.36703823  | 0.115008047 |
| ENSGALG00010006003 | 0.458279308 | 0.217237622 |
| ENSGALG00010006004 | 0.556388942 | 0.331129438 |
| ENSGALG00010006005 | 0.689168208 | 0.448696931 |
| ENSGALG00010006006 | 0.715346457 | 0.348329841 |
| ENSGALG00010006007 | 0.153280279 | 0.127393813 |
| ENSGALG00010006008 | 0.425892345 | 0.140604944 |
| ENSGALG00010006009 | 0.972038005 | 0.332178038 |
| ENSGALG00010006010 | 0.92283497  | 0.200221562 |
| ENSGALG00010006011 | 0.982586621 | 0.348724642 |
| ENSGALG00010006012 | 0.379952917 | 0.147982463 |
| ENSGALG00010006013 | 0.65693844  | 0.13221887  |
| ENSGALG00010006015 | 0.931414466 | 0.214015258 |
| ENSGALG00010006016 | 0.07078608  | 0.18958579  |
| ENSGALG00010006018 | 0.053029702 | 0.24059774  |
| ENSGALG00010006020 | 0.395956512 | 0.135331957 |
| ENSGALG00010006021 | 0.48238223  | 0.243950173 |

|                    |             |             |
|--------------------|-------------|-------------|
| ENSGALG00010006022 | 0.625173288 | 0.06150088  |
| ENSGALG00010006023 | 0.626647294 | 0.243991815 |
| ENSGALG00010006024 | 0.811714262 | 0.265716933 |
| ENSGALG00010006025 | 0.901505435 | 0.170882239 |
| ENSGALG00010006026 | 0.075982956 | 0.067327113 |
| ENSGALG00010006028 | 0.903292815 | 0.325403485 |
| ENSGALG00010006029 | 0.874904782 | 0.227276245 |
| ENSGALG00010006031 | 0.597016068 | 0.058703589 |
| ENSGALG00010006032 | 0.410093186 | 0.167867886 |
| ENSGALG00010006033 | 0.222163819 | 0.072940602 |
| ENSGALG00010006035 | 0.989838668 | 0.35473096  |
| ENSGALG00010006036 | 0.284102763 | 0.000618082 |
| ENSGALG00010006037 | 0.973465552 | 0.399915132 |
| ENSGALG00010006038 | 0.563375165 | 0.053772731 |
| ENSGALG00010006039 | 0.784924959 | 0.348830946 |
| ENSGALG00010006040 | 0.07211826  | 0.164320234 |
| ENSGALG00010006041 | 0.882826269 | 0.245720303 |
| ENSGALG00010006042 | 0.432123421 | 0.320526545 |
| ENSGALG00010006045 | 0.192115082 | 0.095815865 |
| ENSGALG00010006046 | 0.581450214 | 0.212540732 |
| ENSGALG00010006047 | 0.718123403 | 0.414274534 |
| ENSGALG00010006048 | 0.734206861 | 0.108559915 |
| ENSGALG00010006049 | 0.875979049 | 0.251749221 |
| ENSGALG00010006051 | 0.981981389 | 0.285884229 |
| ENSGALG00010006052 | 0.883509874 | 0.380085223 |
| ENSGALG00010006053 | 0.932135849 | 0.249846693 |
| ENSGALG00010006054 | 0.376469181 | 0.114887751 |
| ENSGALG00010006055 | 0.966584843 | 0.311195149 |
| ENSGALG00010006057 | 0.912361721 | 0.27414705  |
| ENSGALG00010006058 | 0.05197934  | 0.14495833  |
| ENSGALG00010006059 | 0.933873767 | 0.26229376  |
| ENSGALG00010006060 | 0.837492065 | 0.112310867 |
| ENSGALG00010006061 | 0.852315618 | 0.324072573 |
| ENSGALG00010006062 | 0.29617809  | 0.309362499 |
| ENSGALG00010006063 | 0.892162555 | 0.385585867 |
| ENSGALG00010006064 | 0.790188568 | 0.29008171  |
| ENSGALG00010006065 | 0.3207622   | 0.38418892  |
| ENSGALG00010006066 | 0.921584259 | 0.280825751 |
| ENSGALG00010006068 | 0.422264561 | 0.132048224 |
| ENSGALG00010006069 | 0.997542704 | 0.348863768 |
| ENSGALG00010006070 | 0.252962569 | 0.019963585 |
| ENSGALG00010006071 | 0.244081578 | 0.450511409 |
| ENSGALG00010006072 | 0.971292547 | 0.274038599 |
| ENSGALG00010006073 | 0.679682664 | 0.383144518 |
| ENSGALG00010006075 | 0.70145155  | 0.249031403 |
| ENSGALG00010006076 | 0.887357578 | 0.327338188 |
| ENSGALG00010006077 | 0.938357376 | 0.298858279 |
| ENSGALG00010006078 | 0.971519779 | 0.229409651 |
| ENSGALG00010006079 | 0.408876452 | 0.029651334 |
| ENSGALG00010006080 | 0.077464899 | 0.000275581 |
| ENSGALG00010006081 | 0.4222328   | 0.091712051 |
| ENSGALG00010006082 | 0.430056618 | 0.437962011 |
| ENSGALG00010006083 | 0.255375373 | 0.086379041 |
| ENSGALG00010006084 | 0.973612281 | 0.231251811 |
| ENSGALG00010006085 | 0.018218104 | 0.162247183 |
| ENSGALG00010006086 | 0.035357136 | 0.162462443 |

|                    |             |             |
|--------------------|-------------|-------------|
| ENSGALG00010006087 | 0.525705259 | 0.192672484 |
| ENSGALG00010006091 | 0.984527966 | 0.408064393 |
| ENSGALG00010006096 | 0.917920374 | 0.486044926 |
| ENSGALG00010006098 | 0.322445469 | 0.120711103 |
| ENSGALG00010006100 | 0.68856425  | 0.052976648 |
| ENSGALG00010006101 | 0.982660858 | 0.308233025 |
| ENSGALG00010006102 | 0.518451772 | 0.210095435 |
| ENSGALG00010006103 | 0.948596717 | 0.313633337 |
| ENSGALG00010006104 | 0.097308482 | 0.337550935 |
| ENSGALG00010006106 | 0.701855338 | 0.278817153 |
| ENSGALG00010006107 | 0.973093096 | 0.358568261 |
| ENSGALG00010006108 | 0.546957716 | 0.522632281 |
| ENSGALG00010006110 | 0.363113293 | 0.145190058 |
| ENSGALG00010006111 | 0.985801713 | 0.349804154 |
| ENSGALG00010006113 | 0.973026111 | 0.362182026 |
| ENSGALG00010006117 | 0.367251011 | 0.280386942 |
| ENSGALG00010006118 | 0.666471822 | 0.02168643  |
| ENSGALG00010006119 | 0.734537844 | 0.257177138 |
| ENSGALG00010006120 | 0.809665393 | 0.230515288 |
| ENSGALG00010006121 | 0.910138562 | 0.32462986  |
| ENSGALG00010006122 | 0.501684793 | 0.152725632 |
| ENSGALG00010006123 | 0.946170543 | 0.317504971 |
| ENSGALG00010006124 | 0.861752126 | 0.297745524 |
| ENSGALG00010006126 | 0.452027473 | 0.03835589  |
| ENSGALG00010006128 | 0.983665854 | 0.354708027 |
| ENSGALG00010006131 | 0.626359497 | 0.350571837 |
| ENSGALG00010006132 | 0.927854834 | 0.255152491 |
| ENSGALG00010006134 | 0.982151905 | 0.346170676 |
| ENSGALG00010006135 | 0.378825597 | 0.199138949 |
| ENSGALG00010006136 | 0.37802745  | 0.171540105 |
| ENSGALG00010006138 | 0.329744371 | 0.371370966 |
| ENSGALG00010006139 | 0.669409648 | 0.157450027 |
| ENSGALG00010006145 | 0.38718504  | 0.101838932 |
| ENSGALG00010006146 | 0.770581638 | 0.186259254 |
| ENSGALG00010006147 | 0.179173248 | 0.216519043 |
| ENSGALG00010006151 | 0.549732411 | 0.192427333 |
| ENSGALG00010006152 | 0.027851816 | 0.14441112  |
| ENSGALG00010006154 | 0.306269874 | 0.488490028 |
| ENSGALG00010006155 | 0.802355923 | 0.153012866 |
| ENSGALG00010006156 | 0.954067412 | 0.303819687 |
| ENSGALG00010006157 | 0.976211681 | 0.335931666 |
| ENSGALG00010006159 | 0.489626513 | 0.217953993 |
| ENSGALG00010006163 | 0.725129725 | 0.441440434 |
| ENSGALG00010006169 | 0.264239718 | 0.073427965 |
| ENSGALG00010006170 | 0.45943766  | 0.392894758 |
| ENSGALG00010006171 | 0.167446935 | 0.233672052 |
| ENSGALG00010006172 | 0.863819985 | 0.408571505 |
| ENSGALG00010006173 | 0.937078963 | 0.235012712 |
| ENSGALG00010006175 | 0.946681949 | 0.192048686 |
| ENSGALG00010006176 | 0.201764926 | 0.136964694 |
| ENSGALG00010006177 | 0.942812675 | 0.25096924  |
| ENSGALG00010006178 | 0.925193491 | 0.329209528 |
| ENSGALG00010006179 | 0.200570274 | 0.091667991 |
| ENSGALG00010006180 | 0.789611754 | 0.377681757 |
| ENSGALG00010006183 | 0.825667834 | 0.095875451 |
| ENSGALG00010006184 | 0.575783925 | 0.168575477 |

|                    |             |             |
|--------------------|-------------|-------------|
| ENSGALG00010006186 | 0.583801249 | 0.336223585 |
| ENSGALG00010006187 | 0.967807656 | 0.369316332 |
| ENSGALG00010006188 | 0.113062198 | 0.076772557 |
| ENSGALG00010006193 | 0.192808433 | 0.004211551 |
| ENSGALG00010006197 | 0.84027474  | 0.346016251 |
| ENSGALG00010006198 | 0.906107698 | 0.419370856 |
| ENSGALG00010006199 | 0.42782925  | 0.112968953 |
| ENSGALG00010006200 | 0.579381643 | 0.322081479 |
| ENSGALG00010006201 | 0.976708947 | 0.323658713 |
| ENSGALG00010006202 | 0.883940364 | 0.207191882 |
| ENSGALG00010006203 | 0.985412275 | 0.279747168 |
| ENSGALG00010006205 | 0.50427348  | 0.088484936 |
| ENSGALG00010006207 | 0.773178421 | 0.352680899 |
| ENSGALG00010006208 | 0.02211005  | 0.18206397  |
| ENSGALG00010006210 | 0.011730111 | 0.196288363 |
| ENSGALG00010006212 | 0.054397003 | 0.280234233 |
| ENSGALG00010006213 | 0.762297002 | 0.002439843 |
| ENSGALG00010006214 | 0.348638671 | 0.161958735 |
| ENSGALG00010006217 | 0.941212107 | 0.43410535  |
| ENSGALG00010006219 | 0.903873125 | 0.261407673 |
| ENSGALG00010006220 | 0.989422047 | 0.331227848 |
| ENSGALG00010006222 | 0.690229393 | 0.206028377 |
| ENSGALG00010006223 | 0.571935146 | 0.259077516 |
| ENSGALG00010006224 | 0.193612503 | 0.242140732 |
| ENSGALG00010006227 | 0.960655778 | 0.351318098 |
| ENSGALG00010006228 | 0.117135557 | 0.146182479 |
| ENSGALG00010006229 | 0.87526     | 0.336284605 |
| ENSGALG00010006230 | 0.992606046 | 0.338211481 |
| ENSGALG00010006231 | 0.47432246  | 0.174095382 |
| ENSGALG00010006232 | 0.814653726 | 0.064496912 |
| ENSGALG00010006236 | 0.849045547 | 0.238632831 |
| ENSGALG00010006237 | 0.897882767 | 0.359963676 |
| ENSGALG00010006238 | 0.562567503 | 0.171952828 |
| ENSGALG00010006239 | 0.992021918 | 0.319495048 |
| ENSGALG00010006240 | 0.808990582 | 0.302500066 |
| ENSGALG00010006241 | 0.985222607 | 0.289845737 |
| ENSGALG00010006242 | 0.536573278 | 0.312854387 |
| ENSGALG00010006243 | 0.803938684 | 0.452372466 |
| ENSGALG00010006244 | 0.928905529 | 0.339375783 |
| ENSGALG00010006245 | 0.637808467 | 0.023715333 |
| ENSGALG00010006246 | 0.234402806 | 0.047342383 |
| ENSGALG00010006247 | 0.085845322 | 0.129897524 |
| ENSGALG00010006249 | 0.773245359 | 0.18091734  |
| ENSGALG00010006250 | 0.560319604 | 0.08110139  |
| ENSGALG00010006251 | 0.668946577 | 0.328948311 |
| ENSGALG00010006252 | 0.973340557 | 0.332479535 |
| ENSGALG00010006254 | 0.99299954  | 0.33394205  |
| ENSGALG00010006258 | 0.012184093 | 0.540210871 |
| ENSGALG00010006259 | 0.556547417 | 0.14778579  |
| ENSGALG00010006260 | 0.651043613 | 0.398147539 |
| ENSGALG00010006263 | 0.209775994 | 0.090518384 |
| ENSGALG00010006266 | 0.440372721 | 0.318117424 |
| ENSGALG00010006269 | 0.986805542 | 0.347552717 |
| ENSGALG00010006270 | 0.363646358 | 0.142448516 |
| ENSGALG00010006271 | 0.413222587 | 0.086530061 |
| ENSGALG00010006272 | 0.475612077 | 0.164386681 |

|                    |             |             |
|--------------------|-------------|-------------|
| ENSGALG00010006273 | 0.125246052 | 0.156619152 |
| ENSGALG00010006274 | 0.553960346 | 0.231282983 |
| ENSGALG00010006275 | 0.323006951 | 0.337030561 |
| ENSGALG00010006277 | 0.218889418 | 0.114210848 |
| ENSGALG00010006279 | 0.995835471 | 0.323848854 |
| ENSGALG00010006280 | 0.546691943 | 0.235199091 |
| ENSGALG00010006281 | 0.117672892 | 0.229118214 |
| ENSGALG00010006283 | 0.194040703 | 0.297377193 |
| ENSGALG00010006285 | 0.940602528 | 0.427810112 |
| ENSGALG00010006287 | 0.96114406  | 0.268771899 |
| ENSGALG00010006288 | 0.639644138 | 0.083739025 |
| ENSGALG00010006289 | 0.364581264 | 0.057592898 |
| ENSGALG00010006291 | 0.940546633 | 0.389265532 |
| ENSGALG00010006292 | 0.090770829 | 0.281931965 |
| ENSGALG00010006293 | 0.988084473 | 0.319556455 |
| ENSGALG00010006294 | 0.915557786 | 0.362133506 |
| ENSGALG00010006296 | 0.709421275 | 0.406000396 |
| ENSGALG00010006297 | 0.723362365 | 0.2031375   |
| ENSGALG00010006298 | 0.952748241 | 0.284224222 |
| ENSGALG00010006300 | 0.22781856  | 0.157831454 |
| ENSGALG00010006301 | 0.705156473 | 0.37047712  |
| ENSGALG00010006308 | 0.515176991 | 0.260165925 |
| ENSGALG00010006310 | 0.944567268 | 0.417438997 |
| ENSGALG00010006311 | 0.956421826 | 0.362662377 |
| ENSGALG00010006315 | 0.125119703 | 0.200269423 |
| ENSGALG00010006318 | 0.960809734 | 0.229295094 |
| ENSGALG00010006323 | 0.844551723 | 0.206648108 |
| ENSGALG00010006326 | 0.914200967 | 0.486854517 |
| ENSGALG00010006327 | 0.922786813 | 0.193709399 |
| ENSGALG00010006328 | 0.36919582  | 0.393584224 |
| ENSGALG00010006329 | 0.753080343 | 0.36175247  |
| ENSGALG00010006330 | 0.046551646 | 0.053640801 |
| ENSGALG00010006331 | 0.900188704 | 0.160421627 |
| ENSGALG00010006335 | 0.463235888 | 0.207880444 |
| ENSGALG00010006336 | 0.993948623 | 0.346454884 |
| ENSGALG00010006339 | 0.970333212 | 0.243354116 |
| ENSGALG00010006341 | 0.80312312  | 0.255774418 |
| ENSGALG00010006342 | 0.897688677 | 0.177188641 |
| ENSGALG00010006343 | 0.530934554 | 0.276567787 |
| ENSGALG00010006344 | 0.474073154 | 0.33762903  |
| ENSGALG00010006345 | 0.814859505 | 0.281294295 |
| ENSGALG00010006346 | 0.334770131 | 0.107550766 |
| ENSGALG00010006347 | 0.976557384 | 0.288380018 |
| ENSGALG00010006348 | 0.959503241 | 0.270546543 |
| ENSGALG00010006349 | 0.123552071 | 0.292330233 |
| ENSGALG00010006350 | 0.870997354 | 0.349048161 |
| ENSGALG00010006351 | 0.850470041 | 0.191333303 |
| ENSGALG00010006352 | 0.964384362 | 0.273146769 |
| ENSGALG00010006353 | 0.091642254 | 0.195973548 |
| ENSGALG00010006354 | 0.345563967 | 0.539322521 |
| ENSGALG00010006355 | 0.985089359 | 0.351522991 |
| ENSGALG00010006357 | 0.441770554 | 0.140145291 |
| ENSGALG00010006359 | 0.593486424 | 0.293746924 |
| ENSGALG00010006360 | 0.052836869 | 0.101827534 |
| ENSGALG00010006361 | 0.967825629 | 0.312489216 |
| ENSGALG00010006363 | 0.850674577 | 0.443833421 |

|                    |             |             |
|--------------------|-------------|-------------|
| ENSGALG00010006371 | 0.581190394 | 0.413109814 |
| ENSGALG00010006372 | 0.744540409 | 0.310859578 |
| ENSGALG00010006373 | 0.302872319 | 0.228723642 |
| ENSGALG00010006377 | 0.600496229 | 0.130052872 |
| ENSGALG00010006378 | 0.919986547 | 0.302233338 |
| ENSGALG00010006379 | 0.289519971 | 0.231055599 |
| ENSGALG00010006381 | 0.945460164 | 0.286199426 |
| ENSGALG00010006382 | 0.586472643 | 0.037449223 |
| ENSGALG00010006385 | 0.493878369 | 0.356494833 |
| ENSGALG00010006387 | 0.341035137 | 0.229219755 |
| ENSGALG00010006388 | 0.262922434 | 0.138601464 |
| ENSGALG00010006389 | 0.82106016  | 0.465483387 |
| ENSGALG00010006391 | 0.834523804 | 0.407644406 |
| ENSGALG00010006393 | 0.799655762 | 0.440977244 |
| ENSGALG00010006396 | 0.559173738 | 0.234928664 |
| ENSGALG00010006397 | 0.5862764   | 0.100752261 |
| ENSGALG00010006398 | 0.144773091 | 0.033673205 |
| ENSGALG00010006401 | 0.059174359 | 0.219786842 |
| ENSGALG00010006402 | 0.368476583 | 0.099553507 |
| ENSGALG00010006404 | 0.281600925 | 0.171317723 |
| ENSGALG00010006405 | 0.492883351 | 0.193792026 |
| ENSGALG00010006408 | 0.866367625 | 0.371157487 |
| ENSGALG00010006410 | 0.566518005 | 0.375384983 |
| ENSGALG00010006411 | 0.007131848 | 0.533865704 |
| ENSGALG00010006416 | 0.89872696  | 0.472287801 |
| ENSGALG00010006419 | 0.679894642 | 0.460628567 |
| ENSGALG00010006421 | 0.871470033 | 0.236546075 |
| ENSGALG00010006423 | 0.301206853 | 0.404439853 |
| ENSGALG00010006430 | 0.592815116 | 0.208011855 |
| ENSGALG00010006431 | 0.95312199  | 0.33940522  |
| ENSGALG00010006433 | 0.442258235 | 0.117686659 |
| ENSGALG00010006434 | 0.900988374 | 0.302656362 |
| ENSGALG00010006435 | 0.467745341 | 0.297729333 |
| ENSGALG00010006436 | 0.787594863 | 0.243156604 |
| ENSGALG00010006437 | 0.427448022 | 0.102041997 |
| ENSGALG00010006438 | 0.803413245 | 0.237798277 |
| ENSGALG00010006440 | 0.704575566 | 0.106614288 |
| ENSGALG00010006441 | 0.905553789 | 0.325648752 |
| ENSGALG00010006443 | 0.946790994 | 0.356558638 |
| ENSGALG00010006445 | 0.541009733 | 0.016858784 |
| ENSGALG00010006446 | 0.639538262 | 0.388187335 |
| ENSGALG00010006447 | 0.005451243 | 0.223294019 |
| ENSGALG00010006449 | 0.299725593 | 0.050338716 |
| ENSGALG00010006451 | 0.817564681 | 0.295685925 |
| ENSGALG00010006453 | 0.850698908 | 0.309083045 |
| ENSGALG00010006454 | 0.317218683 | 0.027551815 |
| ENSGALG00010006455 | 0.036215381 | 0.132705637 |
| ENSGALG00010006457 | 0.619469084 | 0.049976524 |
| ENSGALG00010006458 | 0.501925815 | 0.02411461  |
| ENSGALG00010006463 | 0.227172267 | 0.227644594 |
| ENSGALG00010006465 | 0.75552041  | 0.306238184 |
| ENSGALG00010006466 | 0.666431755 | 0.283848077 |
| ENSGALG00010006469 | 0.430731489 | 0.123241269 |
| ENSGALG00010006470 | 0.52256903  | 0.163003117 |
| ENSGALG00010006471 | 0.288666205 | 0.121620874 |
| ENSGALG00010006472 | 0.195389286 | 0.178128866 |

|                    |             |             |
|--------------------|-------------|-------------|
| ENSGALG00010006474 | 0.187514554 | 0.108479243 |
| ENSGALG00010006478 | 0.965995376 | 0.352423143 |
| ENSGALG00010006479 | 0.285272007 | 0.109169955 |
| ENSGALG00010006480 | 0.137074409 | 0.209396109 |
| ENSGALG00010006481 | 0.38344303  | 0.176088516 |
| ENSGALG00010006483 | 0.495892281 | 0.20079274  |
| ENSGALG00010006485 | 0.384884589 | 0.078217936 |
| ENSGALG00010006486 | 0.935027304 | 0.296960953 |
| ENSGALG00010006487 | 0.996043841 | 0.349078073 |
| ENSGALG00010006488 | 0.318788652 | 0.201270103 |
| ENSGALG00010006490 | 0.290124509 | 0.166136778 |
| ENSGALG00010006492 | 0.474988409 | 0.367642333 |
| ENSGALG00010006493 | 0.20977128  | 0.144828218 |
| ENSGALG00010006494 | 0.025223182 | 0.049142008 |
| ENSGALG00010006496 | 0.765726763 | 0.263082422 |
| ENSGALG00010006497 | 0.257638506 | 0.173160424 |
| ENSGALG00010006499 | 0.854137837 | 0.348260869 |
| ENSGALG00010006503 | 0.232813515 | 0.176922988 |
| ENSGALG00010006506 | 0.863526828 | 0.365022095 |
| ENSGALG00010006508 | 0.264239718 | 0.073427965 |
| ENSGALG00010006510 | 0.777179959 | 0.226812406 |
| ENSGALG00010006514 | 0.822136083 | 0.334118032 |
| ENSGALG00010006515 | 0.942875963 | 0.2862626   |
| ENSGALG00010006516 | 0.956325282 | 0.306884444 |
| ENSGALG00010006517 | 0.824344797 | 0.265301984 |
| ENSGALG00010006519 | 0.593599655 | 0.176400255 |
| ENSGALG00010006521 | 0.794501667 | 0.276649332 |
| ENSGALG00010006523 | 0.330870409 | 0.017225032 |
| ENSGALG00010006524 | 0.44688589  | 0.354016979 |
| ENSGALG00010006525 | 0.917037558 | 0.366152884 |
| ENSGALG00010006526 | 0.909617503 | 0.278716837 |
| ENSGALG00010006527 | 0.873128888 | 0.361559822 |
| ENSGALG00010006528 | 0.736312387 | 0.368569049 |
| ENSGALG00010006529 | 0.868702521 | 0.314055075 |
| ENSGALG00010006530 | 0.656780958 | 0.248036687 |
| ENSGALG00010006531 | 0.402883264 | 0.115342988 |
| ENSGALG00010006532 | 0.989262999 | 0.318505758 |
| ENSGALG00010006533 | 0.292704713 | 0.009723639 |
| ENSGALG00010006535 | 0.30101212  | 0.182183218 |
| ENSGALG00010006537 | 0.868323755 | 0.239970449 |
| ENSGALG00010006538 | 0.976426143 | 0.266898289 |
| ENSGALG00010006540 | 0.531373855 | 0.099889385 |
| ENSGALG00010006541 | 0.266137114 | 0.107784983 |
| ENSGALG00010006542 | 0.425434948 | 0.144503696 |
| ENSGALG00010006544 | 0.966321224 | 0.31979076  |
| ENSGALG00010006546 | 0.087947134 | 0.259594956 |
| ENSGALG00010006547 | 0.171346878 | 0.18671556  |
| ENSGALG00010006548 | 0.0000973   | 0.245380759 |
| ENSGALG00010006549 | 0.272652018 | 0.281906251 |
| ENSGALG00010006550 | 0.226141252 | 0.067152688 |
| ENSGALG00010006551 | 0.252996222 | 0.123283049 |
| ENSGALG00010006553 | 0.674310757 | 0.247203213 |
| ENSGALG00010006555 | 0.384513156 | 0.050700089 |
| ENSGALG00010006556 | 0.712019294 | 0.146329266 |
| ENSGALG00010006557 | 0.759531909 | 0.303913217 |
| ENSGALG00010006558 | 0.146442103 | 0.070711242 |



|                    |             |             |
|--------------------|-------------|-------------|
| ENSGALG00010006559 | 0.102332061 | 0.177954201 |
| ENSGALG00010006561 | 0.687243203 | 0.188259654 |
| ENSGALG00010006564 | 0.916095994 | 0.519356845 |
| ENSGALG00010006565 | 0.642577806 | 0.015823771 |
| ENSGALG00010006567 | 0.980245168 | 0.327867299 |
| ENSGALG00010006568 | 0.953177388 | 0.406828232 |
| ENSGALG00010006569 | 0.727062223 | 0.248761022 |
| ENSGALG00010006570 | 0.997179075 | 0.335960784 |
| ENSGALG00010006573 | 0.651733519 | 0.179489358 |
| ENSGALG00010006575 | 0.733824754 | 0.329463759 |
| ENSGALG00010006576 | 0.630639467 | 0.014168728 |
| ENSGALG00010006577 | 0.559741545 | 0.272653337 |
| ENSGALG00010006578 | 0.381415582 | 0.158761082 |
| ENSGALG00010006579 | 0.204484783 | 0.111640026 |
| ENSGALG00010006580 | 0.855073604 | 0.369620512 |
| ENSGALG00010006581 | 0.804421305 | 0.365260826 |
| ENSGALG00010006583 | 0.390174796 | 0.089394357 |
| ENSGALG00010006584 | 0.899612476 | 0.433428655 |
| ENSGALG00010006585 | 0.596384477 | 0.485018009 |
| ENSGALG00010006586 | 0.684253287 | 0.286050663 |
| ENSGALG00010006587 | 0.236089331 | 0.101960766 |
| ENSGALG00010006588 | 0.835552788 | 0.373716868 |
| ENSGALG00010006589 | 0.676038014 | 0.284531658 |
| ENSGALG00010006590 | 0.38238129  | 0.047731314 |
| ENSGALG00010006592 | 0.814799135 | 0.256731023 |
| ENSGALG00010006593 | 0.363541789 | 0.477615452 |
| ENSGALG00010006594 | 0.524948949 | 0.016554301 |
| ENSGALG00010006596 | 0.688791927 | 0.029976401 |
| ENSGALG00010006597 | 0.491271376 | 0.147715189 |
| ENSGALG00010006598 | 0.136035637 | 0.157163419 |
| ENSGALG00010006599 | 0.437628005 | 0.184427623 |
| ENSGALG00010006601 | 0.478966979 | 0.276152886 |
| ENSGALG00010006602 | 0.905948592 | 0.420943341 |
| ENSGALG00010006603 | 0.869657892 | 0.326208681 |
| ENSGALG00010006604 | 0.802099001 | 0.30993875  |
| ENSGALG00010006605 | 0.534109888 | 0.498183749 |
| ENSGALG00010006606 | 0.988381069 | 0.348122652 |
| ENSGALG00010006608 | 0.784102435 | 0.350323685 |
| ENSGALG00010006609 | 0.020656918 | 0.064774402 |
| ENSGALG00010006610 | 0.464421117 | 0.176201614 |
| ENSGALG00010006612 | 0.911397495 | 0.308185445 |
| ENSGALG00010006614 | 0.910350045 | 0.291849781 |
| ENSGALG00010006615 | 0.922887921 | 0.480454544 |
| ENSGALG00010006616 | 0.776620738 | 0.036060155 |
| ENSGALG00010006617 | 0.705343505 | 0.30932745  |
| ENSGALG00010006618 | 0.903676314 | 0.436474824 |
| ENSGALG00010006619 | 0.243241982 | 0.141488467 |
| ENSGALG00010006620 | 0.388695239 | 0.167312355 |
| ENSGALG00010006621 | 0.648717053 | 0.421292768 |
| ENSGALG00010006623 | 0.02695674  | 0.195877388 |
| ENSGALG00010006625 | 0.243802365 | 0.451193702 |
| ENSGALG00010006626 | 0.703002556 | 0.271258975 |
| ENSGALG00010006627 | 0.979798427 | 0.313410297 |
| ENSGALG00010006628 | 0.637296104 | 0.54193683  |
| ENSGALG00010006629 | 0.851951351 | 0.434380037 |
| ENSGALG00010006631 | 0.446546561 | 0.180252848 |

|                    |             |             |
|--------------------|-------------|-------------|
| ENSGALG00010006632 | 0.797131802 | 0.339679194 |
| ENSGALG00010006633 | 0.961729121 | 0.409004962 |
| ENSGALG00010006634 | 0.933259342 | 0.239014143 |
| ENSGALG00010006635 | 0.555681323 | 0.240324984 |
| ENSGALG00010006639 | 0.747048447 | 0.263916337 |
| ENSGALG00010006640 | 0.663605216 | 0.218038354 |
| ENSGALG00010006641 | 0.359764388 | 0.291712476 |
| ENSGALG00010006643 | 0.55155225  | 0.470772151 |
| ENSGALG00010006644 | 0.224673059 | 0.394837105 |
| ENSGALG00010006646 | 0.603766575 | 0.158236572 |
| ENSGALG00010006649 | 0.264239718 | 0.073427965 |
| ENSGALG00010006651 | 0.929597132 | 0.336986122 |
| ENSGALG00010006652 | 0.873546391 | 0.317159956 |
| ENSGALG00010006653 | 0.997431688 | 0.311906827 |
| ENSGALG00010006657 | 0.423584977 | 0.183248772 |
| ENSGALG00010006659 | 0.851912781 | 0.300917142 |
| ENSGALG00010006662 | 0.002346192 | 0.176799405 |
| ENSGALG00010006663 | 0.646107629 | 0.194502589 |
| ENSGALG00010006664 | 0.38718504  | 0.101838932 |
| ENSGALG00010006667 | 0.265558089 | 0.028821141 |
| ENSGALG00010006668 | 0.701816149 | 0.222982998 |
| ENSGALG00010006669 | 0.521930895 | 0.258285298 |
| ENSGALG00010006670 | 0.504317729 | 0.271197824 |
| ENSGALG00010006671 | 0.440281419 | 0.080881678 |
| ENSGALG00010006672 | 0.782520466 | 0.223731147 |
| ENSGALG00010006673 | 0.963900587 | 0.349000171 |
| ENSGALG00010006674 | 0.18447255  | 0.321216244 |
| ENSGALG00010006676 | 0.030637844 | 0.185580366 |
| ENSGALG00010006678 | 0.833424225 | 0.356199328 |
| ENSGALG00010006679 | 0.104362205 | 0.069579145 |
| ENSGALG00010006681 | 0.310234322 | 0.059859784 |
| ENSGALG00010006682 | 0.150194346 | 0.222485047 |
| ENSGALG00010006683 | 0.297090418 | 0.136289521 |
| ENSGALG00010006684 | 0.390466756 | 0.106163828 |
| ENSGALG00010006685 | 0.901285311 | 0.347547572 |
| ENSGALG00010006686 | 0.594364474 | 0.225021311 |
| ENSGALG00010006687 | 0.571664577 | 0.19672089  |
| ENSGALG00010006691 | 0.110755281 | 0.399241662 |
| ENSGALG00010006692 | 0.009429422 | 0.134618735 |
| ENSGALG00010006693 | 0.393293574 | 0.180300648 |
| ENSGALG00010006694 | 0.511990851 | 0.470205549 |
| ENSGALG00010006698 | 0.071132652 | 0.475126547 |
| ENSGALG00010006699 | 0.596878346 | 0.287670893 |
| ENSGALG00010006702 | 0.41879472  | 0.14401035  |
| ENSGALG00010006705 | 0.600683349 | 0.215693269 |
| ENSGALG00010006706 | 0.031329216 | 0.144699932 |
| ENSGALG00010006707 | 0.66803062  | 0.261745818 |
| ENSGALG00010006708 | 0.249895964 | 0.10495343  |
| ENSGALG00010006710 | 0.562885938 | 0.13207895  |
| ENSGALG00010006713 | 0.298140893 | 0.421788492 |
| ENSGALG00010006715 | 0.977007214 | 0.309844255 |
| ENSGALG00010006716 | 0.985696935 | 0.31266727  |
| ENSGALG00010006717 | 0.378386997 | 0.131934372 |
| ENSGALG00010006718 | 0.888094379 | 0.329403991 |
| ENSGALG00010006720 | 0.964451638 | 0.33171247  |
| ENSGALG00010006721 | 0.30622539  | 0.12456887  |

|                    |             |             |
|--------------------|-------------|-------------|
| ENSGALG00010006722 | 0.422845567 | 0.249434515 |
| ENSGALG00010006723 | 0.065916238 | 0.156310701 |
| ENSGALG00010006724 | 0.271701261 | 0.072417625 |
| ENSGALG00010006725 | 0.118562097 | 0.25015439  |
| ENSGALG00010006726 | 0.092059195 | 0.088327562 |
| ENSGALG00010006728 | 0.981700154 | 0.247979895 |
| ENSGALG00010006729 | 0.285272007 | 0.109169955 |
| ENSGALG00010006730 | 0.038199932 | 0.114027168 |
| ENSGALG00010006731 | 0.421743348 | 0.025884428 |
| ENSGALG00010006735 | 0.539098195 | 0.565518189 |
| ENSGALG00010006736 | 0.315858663 | 0.645614603 |
| ENSGALG00010006738 | 0.438218602 | 0.08510368  |
| ENSGALG00010006739 | 0.331263383 | 0.32986735  |
| ENSGALG00010006740 | 0.27278291  | 0.05676752  |
| ENSGALG00010006741 | 0.208353503 | 0.26439411  |
| ENSGALG00010006744 | 0.042343157 | 0.133098028 |
| ENSGALG00010006745 | 0.043544722 | 0.088274573 |
| ENSGALG00010006746 | 0.424169595 | 0.262793288 |
| ENSGALG00010006748 | 0.968757293 | 0.343172523 |
| ENSGALG00010006750 | 0.775943759 | 0.211619145 |
| ENSGALG00010006752 | 0.954827593 | 0.242789735 |
| ENSGALG00010006759 | 0.657067604 | 0.030786243 |
| ENSGALG00010006760 | 0.73565268  | 0.32729598  |
| ENSGALG00010006761 | 0.95520805  | 0.33617771  |
| ENSGALG00010006762 | 0.265558089 | 0.028821141 |
| ENSGALG00010006766 | 0.074962637 | 0.299647683 |
| ENSGALG00010006767 | 0.987679643 | 0.314547023 |
| ENSGALG00010006769 | 0.544429863 | 0.194115562 |
| ENSGALG00010006770 | 0.125310258 | 0.260060126 |
| ENSGALG00010006774 | 0.483072825 | 0.484151838 |
| ENSGALG00010006777 | 0.501749778 | 0.227205256 |
| ENSGALG00010006779 | 0.548925716 | 0.176108321 |
| ENSGALG00010006780 | 0.488988474 | 0.092908732 |
| ENSGALG00010006783 | 0.171913555 | 0.242423517 |
| ENSGALG00010006784 | 0.6677448   | 0.326050973 |
| ENSGALG00010006785 | 0.869150634 | 0.451783971 |
| ENSGALG00010006786 | 0.386627722 | 0.084137494 |
| ENSGALG00010006789 | 0.420781679 | 0.470790778 |
| ENSGALG00010006794 | 0.257246662 | 0.109487779 |
| ENSGALG00010006795 | 0.043616815 | 0.215810579 |
| ENSGALG00010006799 | 0.261865986 | 0.070958853 |
| ENSGALG00010006803 | 0.876159321 | 0.234572118 |
| ENSGALG00010006804 | 0.875381081 | 0.313623026 |
| ENSGALG00010006805 | 0.168321586 | 0.146624045 |
| ENSGALG00010006806 | 0.316899359 | 0.255164935 |
| ENSGALG00010006808 | 0.297716184 | 0.001645542 |
| ENSGALG00010006814 | 0.270775198 | 0.031145073 |
| ENSGALG00010006816 | 0.97139617  | 0.255555089 |
| ENSGALG00010006819 | 0.903130502 | 0.088585546 |
| ENSGALG00010006820 | 0.704709969 | 0.290075427 |
| ENSGALG00010006821 | 0.723707208 | 0.156812182 |
| ENSGALG00010006823 | 0.001907955 | 0.10870884  |
| ENSGALG00010006824 | 0.655229343 | 0.262735098 |
| ENSGALG00010006828 | 0.464880837 | 0.012361113 |
| ENSGALG00010006829 | 0.044640162 | 0.167754086 |
| ENSGALG00010006831 | 0.373446581 | 0.117589412 |

|                    |             |             |
|--------------------|-------------|-------------|
| ENSGALG00010006832 | 0.760691721 | 0.026127363 |
| ENSGALG00010006833 | 0.594930662 | 0.062208807 |
| ENSGALG00010006835 | 0.920548212 | 0.34231951  |
| ENSGALG00010006836 | 0.485794128 | 0.262733795 |
| ENSGALG00010006838 | 0.890089395 | 0.400643463 |
| ENSGALG00010006839 | 0.550027728 | 0.383241221 |
| ENSGALG00010006840 | 0.626470738 | 0.014543399 |
| ENSGALG00010006842 | 0.396302421 | 0.165008599 |
| ENSGALG00010006843 | 0.690341122 | 0.022715897 |
| ENSGALG00010006845 | 0.73465908  | 0.257093044 |
| ENSGALG00010006847 | 0.975693063 | 0.324028907 |
| ENSGALG00010006848 | 0.341117049 | 0.184223483 |
| ENSGALG00010006849 | 0.700663166 | 0.205713868 |
| ENSGALG00010006850 | 0.844454567 | 0.227171292 |
| ENSGALG00010006851 | 0.737669242 | 0.409776131 |
| ENSGALG00010006853 | 0.134962965 | 0.004503123 |
| ENSGALG00010006855 | 0.954016945 | 0.338324265 |
| ENSGALG00010006865 | 0.705969566 | 0.260639524 |
| ENSGALG00010006869 | 0.860745396 | 0.190254528 |
| ENSGALG00010006870 | 0.921063213 | 0.19793942  |
| ENSGALG00010006875 | 0.98815265  | 0.332935897 |
| ENSGALG00010006877 | 0.97277083  | 0.265111425 |
| ENSGALG00010006878 | 0.39190877  | 0.131701825 |
| ENSGALG00010006881 | 0.573979212 | 0.426769409 |
| ENSGALG00010006883 | 0.972106142 | 0.436010452 |
| ENSGALG00010006884 | 0.534294507 | 0.048716621 |
| ENSGALG00010006885 | 0.525671214 | 0.017132207 |
| ENSGALG00010006886 | 0.393617809 | 0.024107571 |
| ENSGALG00010006888 | 0.400890859 | 0.096271928 |
| ENSGALG00010006893 | 0.187514554 | 0.108479243 |
| ENSGALG00010006894 | 0.376027077 | 0.160418854 |
| ENSGALG00010006895 | 0.143865107 | 0.471109384 |
| ENSGALG00010006896 | 0.635952182 | 0.2006274   |
| ENSGALG00010006898 | 0.344512287 | 0.234480692 |
| ENSGALG00010006899 | 0.265558089 | 0.028821141 |
| ENSGALG00010006900 | 0.02931309  | 0.104495807 |
| ENSGALG00010006901 | 0.976478349 | 0.333201982 |
| ENSGALG00010006903 | 0.932355121 | 0.183651234 |
| ENSGALG00010006904 | 0.305017618 | 0.066195483 |
| ENSGALG00010006908 | 0.169302787 | 0.144152203 |
| ENSGALG00010006912 | 0.441047919 | 0.147337308 |
| ENSGALG00010006913 | 0.850183162 | 0.42784386  |
| ENSGALG00010006914 | 0.533200786 | 0.164492814 |
| ENSGALG00010006915 | 0.454748752 | 0.389021691 |
| ENSGALG00010006917 | 0.572249098 | 0.076642541 |
| ENSGALG00010006918 | 0.373495264 | 0.061911944 |
| ENSGALG00010006920 | 0.433169918 | 0.196540535 |
| ENSGALG00010006922 | 0.187033479 | 0.016763766 |
| ENSGALG00010006923 | 0.051631887 | 0.074634259 |
| ENSGALG00010006925 | 0.486038373 | 0.330004745 |
| ENSGALG00010006926 | 0.217193344 | 0.10154739  |
| ENSGALG00010006928 | 0.560838931 | 0.22298192  |
| ENSGALG00010006930 | 0.290122505 | 0.464993379 |
| ENSGALG00010006932 | 0.246886976 | 0.171410319 |
| ENSGALG00010006936 | 0.298399403 | 0.094963927 |
| ENSGALG00010006937 | 0.495855034 | 0.326982799 |

|                    |             |             |
|--------------------|-------------|-------------|
| ENSGALG00010006938 | 0.436251647 | 0.460841142 |
| ENSGALG00010006939 | 0.967835818 | 0.322899413 |
| ENSGALG00010006941 | 0.227985125 | 0.179615573 |
| ENSGALG00010006942 | 0.497900812 | 0.238110765 |
| ENSGALG00010006943 | 0.96543235  | 0.334733275 |
| ENSGALG00010006944 | 0.953667989 | 0.368400438 |
| ENSGALG00010006945 | 0.189240572 | 0.04996112  |
| ENSGALG00010006946 | 0.013079389 | 0.166634288 |
| ENSGALG00010006947 | 0.395705092 | 0.355839569 |
| ENSGALG00010006948 | 0.203991683 | 0.058221925 |
| ENSGALG00010006950 | 0.874550022 | 0.442975418 |
| ENSGALG00010006953 | 0.98176337  | 0.30900893  |
| ENSGALG00010006957 | 0.852845884 | 0.426240577 |
| ENSGALG00010006958 | 0.422932345 | 0.320061084 |
| ENSGALG00010006960 | 0.902317308 | 0.429181911 |
| ENSGALG00010006961 | 0.944579272 | 0.247774955 |
| ENSGALG00010006963 | 0.304394235 | 0.105991836 |
| ENSGALG00010006964 | 0.392206929 | 0.143464443 |
| ENSGALG00010006966 | 0.192228799 | 0.244713287 |
| ENSGALG00010006967 | 0.526941029 | 0.442458428 |
| ENSGALG00010006970 | 0.791432723 | 0.231986573 |
| ENSGALG00010006971 | 0.122234441 | 0.1635518   |
| ENSGALG00010006972 | 0.914943806 | 0.40344649  |
| ENSGALG00010006973 | 0.129344242 | 0.012875835 |
| ENSGALG00010006974 | 0.858121995 | 0.531424868 |
| ENSGALG00010006975 | 0.940415126 | 0.301851362 |
| ENSGALG00010006976 | 0.937738685 | 0.310265475 |
| ENSGALG00010006977 | 0.294226904 | 0.099361029 |
| ENSGALG00010006978 | 0.380291529 | 0.371093026 |
| ENSGALG00010006979 | 0.56568017  | 0.048995438 |
| ENSGALG00010006980 | 0.009429422 | 0.134618735 |
| ENSGALG00010006982 | 0.185362508 | 0.114656568 |
| ENSGALG00010006983 | 0.853967371 | 0.250465093 |
| ENSGALG00010006984 | 0.175070675 | 0.102419576 |
| ENSGALG00010006985 | 0.131572695 | 0.06618527  |
| ENSGALG00010006986 | 0.376061206 | 0.219717698 |
| ENSGALG00010006987 | 0.590507546 | 0.072211601 |
| ENSGALG00010006988 | 0.901664439 | 0.355174614 |
| ENSGALG00010006989 | 0.189240572 | 0.04996112  |
| ENSGALG00010006990 | 0.360182321 | 0.109111334 |
| ENSGALG00010006991 | 0.920275504 | 0.41257906  |
| ENSGALG00010006992 | 0.637273366 | 0.341610027 |
| ENSGALG00010006993 | 0.280412698 | 0.192242784 |
| ENSGALG00010006995 | 0.055072366 | 0.269090805 |
| ENSGALG00010006998 | 0.903125462 | 0.353149842 |
| ENSGALG00010006999 | 0.995165295 | 0.334439664 |
| ENSGALG00010007000 | 0.843551294 | 0.169008763 |
| ENSGALG00010007001 | 0.845467046 | 0.280715512 |
| ENSGALG00010007002 | 0.826896902 | 0.296615688 |
| ENSGALG00010007004 | 0.035248149 | 0.150556591 |
| ENSGALG00010007005 | 0.318687505 | 0.288388919 |
| ENSGALG00010007007 | 0.974874705 | 0.29310442  |
| ENSGALG00010007010 | 0.238798511 | 0.049658162 |
| ENSGALG00010007011 | 0.855468672 | 0.263459461 |
| ENSGALG00010007012 | 0.911938931 | 0.360626669 |
| ENSGALG00010007014 | 0.057689882 | 0.461357923 |

|                    |             |             |
|--------------------|-------------|-------------|
| ENSGALG00010007017 | 0.964703129 | 0.295081849 |
| ENSGALG00010007018 | 0.17304218  | 0.03557151  |
| ENSGALG00010007020 | 0.282754916 | 0.323313762 |
| ENSGALG00010007021 | 0.113952352 | 0.294776878 |
| ENSGALG00010007022 | 0.539708078 | 0.220276126 |
| ENSGALG00010007023 | 0.150541675 | 0.404144522 |
| ENSGALG00010007026 | 0.607259018 | 0.160727156 |
| ENSGALG00010007027 | 0.386613367 | 0.019266881 |
| ENSGALG00010007028 | 0.365769806 | 0.550992416 |
| ENSGALG00010007031 | 0.527077587 | 0.189594978 |
| ENSGALG00010007033 | 0.931952795 | 0.2798311   |
| ENSGALG00010007034 | 0.66471661  | 0.215343526 |
| ENSGALG00010007035 | 0.336981112 | 0.183312475 |
| ENSGALG00010007037 | 0.394927857 | 0.119113854 |
| ENSGALG00010007038 | 0.94620361  | 0.28504413  |
| ENSGALG00010007040 | 0.278765262 | 0.561539442 |
| ENSGALG00010007041 | 0.889063878 | 0.120189813 |
| ENSGALG00010007042 | 0.264239718 | 0.073427965 |
| ENSGALG00010007044 | 0.298147409 | 0.947793135 |
| ENSGALG00010007045 | 0.232169808 | 0.218282188 |
| ENSGALG00010007049 | 0.266390355 | 0.110076851 |
| ENSGALG00010007050 | 0.360211434 | 0.130556139 |
| ENSGALG00010007051 | 0.721156718 | 0.075394243 |
| ENSGALG00010007052 | 0.669165296 | 0.077258689 |
| ENSGALG00010007054 | 0.932229037 | 0.284898285 |
| ENSGALG00010007055 | 0.387690559 | 0.167570115 |
| ENSGALG00010007056 | 0.381476961 | 0.077101777 |
| ENSGALG00010007058 | 0.730630771 | 0.175553945 |
| ENSGALG00010007065 | 0.285272007 | 0.109169955 |
| ENSGALG00010007066 | 0.460467165 | 0.0327956   |
| ENSGALG00010007067 | 0.849682209 | 0.3365614   |
| ENSGALG00010007069 | 0.779316773 | 0.257010877 |
| ENSGALG00010007070 | 0.295729583 | 0.090714348 |
| ENSGALG00010007072 | 0.744551927 | 0.256000716 |
| ENSGALG00010007073 | 0.565502868 | 0.198302349 |
| ENSGALG00010007074 | 0.024759706 | 0.290387463 |
| ENSGALG00010007075 | 0.159142406 | 0.35223769  |
| ENSGALG00010007080 | 0.810424878 | 0.212731765 |
| ENSGALG00010007082 | 0.925027279 | 0.309231899 |
| ENSGALG00010007083 | 0.073376936 | 0.164024345 |
| ENSGALG00010007085 | 0.943677657 | 0.429474577 |
| ENSGALG00010007087 | 0.184559753 | 0.020588946 |
| ENSGALG00010007088 | 0.009428035 | 0.119453901 |
| ENSGALG00010007090 | 0.924498686 | 0.215399106 |
| ENSGALG00010007091 | 0.081969882 | 0.163235971 |
| ENSGALG00010007092 | 0.874770887 | 0.299461136 |
| ENSGALG00010007093 | 0.185370537 | 0.156674538 |
| ENSGALG00010007096 | 0.039587847 | 0.080998562 |
| ENSGALG00010007097 | 0.838882809 | 0.289566229 |
| ENSGALG00010007098 | 0.605356431 | 0.133569922 |
| ENSGALG00010007100 | 0.563110044 | 0.063989487 |
| ENSGALG00010007102 | 0.860278425 | 0.119805086 |
| ENSGALG00010007103 | 0.661856036 | 0.283120062 |
| ENSGALG00010007104 | 0.47401914  | 0.141095213 |
| ENSGALG00010007106 | 0.758794301 | 0.270107801 |
| ENSGALG00010007108 | 0.474022162 | 0.034109303 |

|                    |             |             |
|--------------------|-------------|-------------|
| ENSGALG00010007110 | 0.948096228 | 0.268036836 |
| ENSGALG00010007114 | 0.869354534 | 0.532056439 |
| ENSGALG00010007115 | 0.025123994 | 0.221855222 |
| ENSGALG00010007116 | 0.497179646 | 0.132176742 |
| ENSGALG00010007118 | 0.14174918  | 0.140251904 |
| ENSGALG00010007119 | 0.202647901 | 0.447600028 |
| ENSGALG00010007121 | 0.50240768  | 0.251798554 |
| ENSGALG00010007123 | 0.228986695 | 0.131712485 |
| ENSGALG00010007124 | 0.684676642 | 0.278308303 |
| ENSGALG00010007126 | 0.736939629 | 0.290465261 |
| ENSGALG00010007128 | 0.901850434 | 0.200997384 |
| ENSGALG00010007130 | 0.245947144 | 0.019015193 |
| ENSGALG00010007131 | 0.08475151  | 0.169540469 |
| ENSGALG00010007133 | 0.53137906  | 0.5740837   |
| ENSGALG00010007134 | 0.18070123  | 0.308411526 |
| ENSGALG00010007135 | 0.878629034 | 0.427505188 |
| ENSGALG00010007136 | 0.274586994 | 0.115798603 |
| ENSGALG00010007137 | 0.002510958 | 0.264896934 |
| ENSGALG00010007138 | 0.154219825 | 0.139547935 |
| ENSGALG00010007139 | 0.220014762 | 0.027996214 |
| ENSGALG00010007140 | 0.043255806 | 0.121677865 |
| ENSGALG00010007141 | 0.94215225  | 0.376231909 |
| ENSGALG00010007142 | 0.734203869 | 0.352981702 |
| ENSGALG00010007143 | 0.988030876 | 0.339006321 |
| ENSGALG00010007144 | 0.128456369 | 0.294809833 |
| ENSGALG00010007146 | 0.797789457 | 0.119494865 |
| ENSGALG00010007149 | 0.396366346 | 0.15714058  |
| ENSGALG00010007150 | 0.534919744 | 0.20594822  |
| ENSGALG00010007152 | 0.326697265 | 0.053245649 |
| ENSGALG00010007153 | 0.425174823 | 0.220759366 |
| ENSGALG00010007154 | 0.548236938 | 0.189832536 |
| ENSGALG00010007155 | 0.271701261 | 0.072417625 |
| ENSGALG00010007156 | 0.584305091 | 0.27009239  |
| ENSGALG00010007157 | 0.185115883 | 0.084746236 |
| ENSGALG00010007158 | 0.119278234 | 0.236527989 |
| ENSGALG00010007159 | 0.310434552 | 0.241198621 |
| ENSGALG00010007160 | 0.099459382 | 0.298674243 |
| ENSGALG00010007162 | 0.926912191 | 0.37994148  |
| ENSGALG00010007163 | 0.16098583  | 0.1577073   |
| ENSGALG00010007164 | 0.883332474 | 0.440454392 |
| ENSGALG00010007165 | 0.065828993 | 0.213972347 |
| ENSGALG00010007166 | 0.708490131 | 0.283021731 |
| ENSGALG00010007168 | 0.103699928 | 0.001651728 |
| ENSGALG00010007169 | 0.857240935 | 0.426464659 |
| ENSGALG00010007172 | 0.623812849 | 0.445679214 |
| ENSGALG00010007173 | 0.643270835 | 0.11725624  |
| ENSGALG00010007174 | 0.639229045 | 0.338907413 |
| ENSGALG00010007175 | 0.24732621  | 0.426241881 |
| ENSGALG00010007176 | 0.265558089 | 0.028821141 |
| ENSGALG00010007178 | 0.3068634   | 0.08143621  |
| ENSGALG00010007181 | 0.788994694 | 0.317943452 |
| ENSGALG00010007182 | 0.123442368 | 0.132272207 |
| ENSGALG00010007183 | 0.899549924 | 0.366875753 |
| ENSGALG00010007184 | 0.980011175 | 0.328288273 |
| ENSGALG00010007185 | 0.444032982 | 0.117142645 |
| ENSGALG00010007187 | 0.649977794 | 0.381762681 |

|                    |             |             |
|--------------------|-------------|-------------|
| ENSGALG00010007188 | 0.8971429   | 0.424593626 |
| ENSGALG00010007189 | 0.845094599 | 0.453932757 |
| ENSGALG00010007190 | 0.790816221 | 0.160691569 |
| ENSGALG00010007191 | 0.378022522 | 0.12438851  |
| ENSGALG00010007193 | 0.833304069 | 0.277517645 |
| ENSGALG00010007197 | 0.716248457 | 0.221228334 |
| ENSGALG00010007200 | 0.929627939 | 0.331752641 |
| ENSGALG00010007201 | 0.875394586 | 0.246104711 |
| ENSGALG00010007203 | 0.779487117 | 0.129904517 |
| ENSGALG00010007204 | 0.784794931 | 0.313074684 |
| ENSGALG00010007205 | 0.830538848 | 0.29331661  |
| ENSGALG00010007206 | 0.362041241 | 0.114713121 |
| ENSGALG00010007207 | 0.974934661 | 0.359724723 |
| ENSGALG00010007208 | 0.352811971 | 0.25549689  |
| ENSGALG00010007209 | 0.105689866 | 0.047456933 |
| ENSGALG00010007210 | 0.794719727 | 0.289503137 |
| ENSGALG00010007211 | 0.212592176 | 0.199636973 |
| ENSGALG00010007212 | 0.138008045 | 0.171652802 |
| ENSGALG00010007214 | 0.927932233 | 0.21878155  |
| ENSGALG00010007215 | 0.299135455 | 0.121432985 |
| ENSGALG00010007216 | 0.217104944 | 0.154584426 |
| ENSGALG00010007217 | 0.521111236 | 0.280540404 |
| ENSGALG00010007218 | 0.428654392 | 0.093790074 |
| ENSGALG00010007220 | 0.427721754 | 0.350441719 |
| ENSGALG00010007221 | 0.44909469  | 0.197877763 |
| ENSGALG00010007222 | 0.34032496  | 0.20641554  |
| ENSGALG00010007223 | 0.855423868 | 0.338948079 |
| ENSGALG00010007224 | 0.982478969 | 0.374310061 |
| ENSGALG00010007226 | 0.997289194 | 0.336947085 |
| ENSGALG00010007228 | 0.382985366 | 0.1291087   |
| ENSGALG00010007230 | 0.056080156 | 0.021833681 |
| ENSGALG00010007231 | 0.375545622 | 0.141397116 |
| ENSGALG00010007232 | 0.689729548 | 0.000862053 |
| ENSGALG00010007236 | 0.972703669 | 0.338210224 |
| ENSGALG00010007237 | 0.2896197   | 0.603980439 |
| ENSGALG00010007238 | 0.766915399 | 0.366000751 |
| ENSGALG00010007243 | 0.525899293 | 0.133069236 |
| ENSGALG00010007245 | 0.84016783  | 0.416467623 |
| ENSGALG00010007251 | 0.924814674 | 0.311822157 |
| ENSGALG00010007252 | 0.988344708 | 0.333242824 |
| ENSGALG00010007253 | 0.133032851 | 0.123652409 |
| ENSGALG00010007254 | 0.009595786 | 0.236128949 |
| ENSGALG00010007258 | 0.94121763  | 0.310849317 |
| ENSGALG00010007259 | 0.827148541 | 0.316573097 |
| ENSGALG00010007261 | 0.443301663 | 0.074818784 |
| ENSGALG00010007263 | 0.399682938 | 0.156656358 |
| ENSGALG00010007264 | 0.67218625  | 0.240719816 |
| ENSGALG00010007265 | 0.609004298 | 0.167946281 |
| ENSGALG00010007266 | 0.668503666 | 0.291438766 |
| ENSGALG00010007267 | 0.881448678 | 0.119048043 |
| ENSGALG00010007268 | 0.51235953  | 0.196324531 |
| ENSGALG00010007269 | 0.450214564 | 0.288590152 |
| ENSGALG00010007270 | 0.961335445 | 0.275093297 |
| ENSGALG00010007271 | 0.354205285 | 0.12892787  |
| ENSGALG00010007274 | 0.449894881 | 0.686553568 |
| ENSGALG00010007275 | 0.902132958 | 0.276184411 |



|                    |             |             |
|--------------------|-------------|-------------|
| ENSGALG00010007277 | 0.375082889 | 0.152666944 |
| ENSGALG00010007278 | 0.684148611 | 0.228871417 |
| ENSGALG00010007283 | 0.663064315 | 0.336405115 |
| ENSGALG00010007284 | 0.884964124 | 0.216619401 |
| ENSGALG00010007285 | 0.731126764 | 0.137092297 |
| ENSGALG00010007287 | 0.232210118 | 0.286057892 |
| ENSGALG00010007294 | 0.145268336 | 0.046523532 |
| ENSGALG00010007296 | 0.362952673 | 0.224034773 |
| ENSGALG00010007298 | 0.194041025 | 0.048796483 |
| ENSGALG00010007300 | 0.794426335 | 0.09864259  |
| ENSGALG00010007302 | 0.784992664 | 0.353682572 |
| ENSGALG00010007304 | 0.99090756  | 0.332997765 |
| ENSGALG00010007305 | 0.134339302 | 0.20703022  |
| ENSGALG00010007315 | 0.909879437 | 0.124744727 |
| ENSGALG00010007318 | 0.951420169 | 0.437323692 |
| ENSGALG00010007319 | 0.954013845 | 0.392693588 |
| ENSGALG00010007320 | 0.564512377 | 0.232194632 |
| ENSGALG00010007321 | 0.837402437 | 0.366588829 |
| ENSGALG00010007322 | 0.934633182 | 0.27047194  |
| ENSGALG00010007323 | 0.805782543 | 0.536724401 |
| ENSGALG00010007324 | 0.879543664 | 0.365990544 |
| ENSGALG00010007325 | 0.793609897 | 0.34397382  |
| ENSGALG00010007326 | 0.965864904 | 0.341215821 |
| ENSGALG00010007327 | 0.033048351 | 0.011248539 |
| ENSGALG00010007328 | 0.528159509 | 0.425225024 |
| ENSGALG00010007330 | 0.328195648 | 0.193703918 |
| ENSGALG00010007331 | 0.495247221 | 0.182126244 |
| ENSGALG00010007333 | 0.927791366 | 0.251819375 |
| ENSGALG00010007334 | 0.979467636 | 0.339804352 |
| ENSGALG00010007337 | 0.363883361 | 0.007169681 |
| ENSGALG00010007339 | 0.006531738 | 0.006476291 |
| ENSGALG00010007342 | 0.009913564 | 0.319435298 |
| ENSGALG00010007343 | 0.239466507 | 0.184011583 |
| ENSGALG00010007344 | 0.484354048 | 0.003397795 |
| ENSGALG00010007345 | 0.825556214 | 0.2772057   |
| ENSGALG00010007348 | 0.196038127 | 0.155571026 |
| ENSGALG00010007349 | 0.401261446 | 0.464525907 |
| ENSGALG00010007350 | 0.327548727 | 0.376586909 |
| ENSGALG00010007353 | 0.335718076 | 0.175391907 |
| ENSGALG00010007355 | 0.075083243 | 0.08983048  |
| ENSGALG00010007356 | 0.194960233 | 0.044643819 |
| ENSGALG00010007357 | 0.317617038 | 0.150602043 |
| ENSGALG00010007360 | 0.898372999 | 0.267915997 |
| ENSGALG00010007365 | 0.994992225 | 0.336144713 |
| ENSGALG00010007369 | 0.081634227 | 0.061371023 |
| ENSGALG00010007371 | 0.769115183 | 0.221830478 |
| ENSGALG00010007372 | 0.170425698 | 0.272333705 |
| ENSGALG00010007373 | 0.405074429 | 0.156360385 |
| ENSGALG00010007374 | 0.964312712 | 0.251533255 |
| ENSGALG00010007375 | 0.946031151 | 0.269151808 |
| ENSGALG00010007376 | 0.929149704 | 0.323915951 |
| ENSGALG00010007379 | 0.309655755 | 0.987979031 |
| ENSGALG00010007380 | 0.300546372 | 0.207185976 |
| ENSGALG00010007381 | 0.992373247 | 0.309187359 |
| ENSGALG00010007382 | 0.912801621 | 0.284387967 |
| ENSGALG00010007386 | 0.265558089 | 0.028821141 |

|                    |             |             |
|--------------------|-------------|-------------|
| ENSGALG00010007387 | 0.024796536 | 0.298082747 |
| ENSGALG00010007388 | 0.445403753 | 0.02466208  |
| ENSGALG00010007389 | 0.420011507 | 0.183671385 |
| ENSGALG00010007390 | 0.695188148 | 0.151610415 |
| ENSGALG00010007391 | 0.939671023 | 0.296345146 |
| ENSGALG00010007392 | 0.555188264 | 0.211726358 |
| ENSGALG00010007393 | 0.970024395 | 0.290513109 |
| ENSGALG00010007394 | 0.066937894 | 0.156633736 |
| ENSGALG00010007395 | 0.48578899  | 0.177061229 |
| ENSGALG00010007396 | 0.388398154 | 0.156498862 |
| ENSGALG00010007399 | 0.966272338 | 0.294717134 |
| ENSGALG00010007400 | 0.964975273 | 0.32049917  |
| ENSGALG00010007401 | 0.904769227 | 0.315191231 |
| ENSGALG00010007403 | 0.948433304 | 0.267411542 |
| ENSGALG00010007404 | 0.778626679 | 0.25202255  |
| ENSGALG00010007405 | 0.257225351 | 0.161505109 |
| ENSGALG00010007406 | 0.206520221 | 0.238812947 |
| ENSGALG00010007408 | 0.931305423 | 0.29302291  |
| ENSGALG00010007410 | 0.394894278 | 0.058875926 |
| ENSGALG00010007412 | 0.022158214 | 0.185570774 |
| ENSGALG00010007413 | 0.382801765 | 0.160449449 |
| ENSGALG00010007414 | 0.833644433 | 0.214502491 |
| ENSGALG00010007416 | 0.937028923 | 0.249096456 |
| ENSGALG00010007417 | 0.45607147  | 0.220265817 |
| ENSGALG00010007418 | 0.378542153 | 0.20653271  |
| ENSGALG00010007419 | 0.230808479 | 0.070365202 |
| ENSGALG00010007422 | 0.225584105 | 0.236913864 |
| ENSGALG00010007423 | 0.858505801 | 0.094635143 |
| ENSGALG00010007425 | 0.745790494 | 0.021350167 |
| ENSGALG00010007427 | 0.013740372 | 0.09360751  |
| ENSGALG00010007428 | 0.15879916  | 0.126551358 |
| ENSGALG00010007429 | 0.625120296 | 0.233051803 |
| ENSGALG00010007430 | 0.935455263 | 0.256900742 |
| ENSGALG00010007432 | 0.962144066 | 0.338702081 |
| ENSGALG00010007433 | 0.267158904 | 0.061604748 |
| ENSGALG00010007434 | 0.265558089 | 0.028821141 |
| ENSGALG00010007436 | 0.901944567 | 0.253455442 |
| ENSGALG00010007437 | 0.909359089 | 0.327006006 |
| ENSGALG00010007439 | 0.716658035 | 0.333194765 |
| ENSGALG00010007440 | 0.277188858 | 0.521691462 |
| ENSGALG00010007441 | 0.928501548 | 0.323365578 |
| ENSGALG00010007442 | 0.616127716 | 0.130183702 |
| ENSGALG00010007444 | 0.364718386 | 0.141909851 |
| ENSGALG00010007445 | 0.072571977 | 0.110244959 |
| ENSGALG00010007447 | 0.212871068 | 0.20313617  |
| ENSGALG00010007448 | 0.588577619 | 0.16213138  |
| ENSGALG00010007452 | 0.245700908 | 0.010899108 |
| ENSGALG00010007453 | 0.391651102 | 0.170523959 |
| ENSGALG00010007455 | 0.211398908 | 0.124336124 |
| ENSGALG00010007457 | 0.601638543 | 0.246294479 |
| ENSGALG00010007459 | 0.831573534 | 0.274556599 |
| ENSGALG00010007461 | 0.068501264 | 0.199097315 |
| ENSGALG00010007462 | 0.554045354 | 0.324672115 |
| ENSGALG00010007464 | 0.951878837 | 0.331018919 |
| ENSGALG00010007465 | 0.930352403 | 0.412781429 |
| ENSGALG00010007467 | 0.990873288 | 0.320484436 |

|                    |             |             |
|--------------------|-------------|-------------|
| ENSGALG00010007472 | 0.030198314 | 0.147519421 |
| ENSGALG00010007473 | 0.274687811 | 0.538498988 |
| ENSGALG00010007474 | 0.285272007 | 0.109169955 |
| ENSGALG00010007477 | 0.066462015 | 0.269260472 |
| ENSGALG00010007479 | 0.930044612 | 0.217572939 |
| ENSGALG00010007480 | 0.967939359 | 0.346514694 |
| ENSGALG00010007485 | 0.466828826 | 0.147376003 |
| ENSGALG00010007490 | 0.266137114 | 0.107784983 |
| ENSGALG00010007494 | 0.673629099 | 0.281454579 |
| ENSGALG00010007495 | 0.982715308 | 0.290661235 |
| ENSGALG00010007496 | 0.944825312 | 0.405660866 |
| ENSGALG00010007497 | 0.8244456   | 0.317706725 |
| ENSGALG00010007500 | 0.50495002  | 0.142878481 |
| ENSGALG00010007501 | 0.394494248 | 0.128304162 |
| ENSGALG00010007502 | 0.393291196 | 0.091976827 |
| ENSGALG00010007503 | 0.138339906 | 0.466345147 |
| ENSGALG00010007505 | 0.748424683 | 0.1779889   |
| ENSGALG00010007506 | 0.088429427 | 0.031370352 |
| ENSGALG00010007510 | 0.319058084 | 0.254756161 |
| ENSGALG00010007513 | 0.929772326 | 0.311238852 |
| ENSGALG00010007514 | 0.712358833 | 0.250462655 |
| ENSGALG00010007515 | 0.705543674 | 0.434611332 |
| ENSGALG00010007517 | 0.292362493 | 0.105019933 |
| ENSGALG00010007519 | 0.506348141 | 0.39842206  |
| ENSGALG00010007520 | 0.216433634 | 0.680598293 |
| ENSGALG00010007521 | 0.986442907 | 0.331371573 |
| ENSGALG00010007523 | 0.12185701  | 0.189684155 |
| ENSGALG00010007525 | 0.205739277 | 0.090549788 |
| ENSGALG00010007528 | 0.394927857 | 0.119113854 |
| ENSGALG00010007529 | 0.983630295 | 0.371358382 |
| ENSGALG00010007532 | 0.900524743 | 0.358624888 |
| ENSGALG00010007536 | 0.068505756 | 0.078327733 |
| ENSGALG00010007537 | 0.308309528 | 0.074072042 |
| ENSGALG00010007539 | 0.717353879 | 0.280887    |
| ENSGALG00010007541 | 0.048532643 | 0.007975711 |
| ENSGALG00010007542 | 0.814400347 | 0.265908891 |
| ENSGALG00010007544 | 0.46578975  | 0.385327486 |
| ENSGALG00010007546 | 0.545878007 | 0.150610418 |
| ENSGALG00010007547 | 0.8639403   | 0.356091594 |
| ENSGALG00010007548 | 0.74544362  | 0.054050581 |
| ENSGALG00010007549 | 0.982172462 | 0.250211317 |
| ENSGALG00010007550 | 0.41485031  | 0.207418775 |
| ENSGALG00010007551 | 0.943522539 | 0.287811132 |
| ENSGALG00010007555 | 0.975719098 | 0.336356738 |
| ENSGALG00010007563 | 0.34081212  | 0.34730063  |
| ENSGALG00010007564 | 0.286231124 | 0.564253946 |
| ENSGALG00010007565 | 0.554076183 | 0.377735479 |
| ENSGALG00010007566 | 0.881693378 | 0.320253539 |
| ENSGALG00010007567 | 0.895564775 | 0.342666723 |
| ENSGALG00010007569 | 0.220728113 | 0.125579138 |
| ENSGALG00010007570 | 0.570740473 | 0.163320661 |
| ENSGALG00010007571 | 0.487434544 | 0.155085468 |
| ENSGALG00010007572 | 0.799086525 | 0.264718347 |
| ENSGALG00010007573 | 0.336850924 | 0.316322825 |
| ENSGALG00010007575 | 0.322714299 | 0.521218221 |
| ENSGALG00010007576 | 0.577035972 | 0.248778849 |

|                    |             |             |
|--------------------|-------------|-------------|
| ENSGALG00010007577 | 0.958958797 | 0.387233724 |
| ENSGALG00010007578 | 0.13263007  | 0.193629681 |
| ENSGALG00010007579 | 0.857043365 | 0.245531199 |
| ENSGALG00010007580 | 0.943340721 | 0.172740367 |
| ENSGALG00010007581 | 0.979665193 | 0.254278351 |
| ENSGALG00010007582 | 0.265558089 | 0.028821141 |
| ENSGALG00010007584 | 0.679736064 | 0.4191066   |
| ENSGALG00010007585 | 0.275115332 | 0.306639425 |
| ENSGALG00010007586 | 0.885478567 | 0.323677491 |
| ENSGALG00010007588 | 0.516281553 | 0.387705629 |
| ENSGALG00010007589 | 0.046309987 | 0.171647964 |
| ENSGALG00010007590 | 0.711035833 | 0.185678435 |
| ENSGALG00010007592 | 0.262641434 | 0.175697698 |
| ENSGALG00010007593 | 0.87609114  | 0.249293366 |
| ENSGALG00010007594 | 0.677745834 | 0.219606546 |
| ENSGALG00010007595 | 0.754101961 | 0.323137102 |
| ENSGALG00010007596 | 0.768045365 | 0.268048115 |
| ENSGALG00010007597 | 0.161208566 | 0.124999242 |
| ENSGALG00010007601 | 0.700368389 | 0.303977012 |
| ENSGALG00010007603 | 0.936771296 | 0.2992622   |
| ENSGALG00010007604 | 0.513417396 | 0.286379319 |
| ENSGALG00010007605 | 0.547076368 | 0.194424191 |
| ENSGALG00010007607 | 0.296272339 | 0.491563762 |
| ENSGALG00010007609 | 0.386863047 | 0.139229068 |
| ENSGALG00010007610 | 0.493098486 | 0.110165594 |
| ENSGALG00010007612 | 0.391097471 | 0.144336359 |
| ENSGALG00010007613 | 0.680602791 | 0.222715696 |
| ENSGALG00010007614 | 0.623981713 | 0.432081756 |
| ENSGALG00010007615 | 0.707719723 | 0.22643292  |
| ENSGALG00010007616 | 0.67142957  | 0.26194615  |
| ENSGALG00010007619 | 0.579986427 | 0.083908469 |
| ENSGALG00010007620 | 0.254205923 | 0.228062898 |
| ENSGALG00010007621 | 0.015345754 | 0.043558471 |
| ENSGALG00010007622 | 0.665854192 | 0.586523538 |
| ENSGALG00010007624 | 0.826307616 | 0.144272508 |
| ENSGALG00010007625 | 0.968904746 | 0.272200465 |
| ENSGALG00010007626 | 0.611566647 | 0.161696034 |
| ENSGALG00010007627 | 0.943050153 | 0.269103403 |
| ENSGALG00010007628 | 0.842596956 | 0.344046049 |
| ENSGALG00010007630 | 0.362381627 | 0.024884518 |
| ENSGALG00010007631 | 0.526828396 | 0.2550782   |
| ENSGALG00010007632 | 0.569684023 | 0.281034047 |
| ENSGALG00010007633 | 0.490624959 | 0.021021549 |
| ENSGALG00010007634 | 0.949667091 | 0.318423859 |
| ENSGALG00010007635 | 0.003243725 | 0.177812847 |
| ENSGALG00010007636 | 0.384670529 | 0.365016543 |
| ENSGALG00010007637 | 0.33777847  | 0.133444889 |
| ENSGALG00010007638 | 0.698645085 | 0.167277175 |
| ENSGALG00010007640 | 0.988477989 | 0.376218188 |
| ENSGALG00010007642 | 0.300109973 | 0.174683106 |
| ENSGALG00010007643 | 0.5399183   | 0.07839718  |
| ENSGALG00010007645 | 0.174736002 | 0.221328073 |
| ENSGALG00010007649 | 0.345702106 | 0.06199354  |
| ENSGALG00010007650 | 0.599617272 | 0.079931667 |
| ENSGALG00010007651 | 0.944343661 | 0.18231755  |
| ENSGALG00010007653 | 0.579983744 | 0.146492439 |

|                    |             |             |
|--------------------|-------------|-------------|
| ENSGALG00010007654 | 0.720031381 | 0.243640669 |
| ENSGALG00010007655 | 0.217976006 | 0.301193524 |
| ENSGALG00010007656 | 0.944609554 | 0.307742679 |
| ENSGALG00010007658 | 0.649964919 | 0.305111406 |
| ENSGALG00010007659 | 0.88693596  | 0.028649057 |
| ENSGALG00010007660 | 0.987513541 | 0.371947408 |
| ENSGALG00010007661 | 0.287562285 | 0.365719592 |
| ENSGALG00010007662 | 0.867467113 | 0.02271483  |
| ENSGALG00010007663 | 0.927914832 | 0.345808753 |
| ENSGALG00010007664 | 0.956840244 | 0.338317343 |
| ENSGALG00010007666 | 0.757930359 | 0.253399301 |
| ENSGALG00010007668 | 0.312802863 | 0.269991217 |
| ENSGALG00010007669 | 0.385953062 | 0.133261917 |
| ENSGALG00010007671 | 0.94357154  | 0.262725039 |
| ENSGALG00010007672 | 0.950413146 | 0.476645303 |
| ENSGALG00010007673 | 0.558546297 | 0.115329526 |
| ENSGALG00010007678 | 0.867431274 | 0.36731114  |
| ENSGALG00010007679 | 0.952795276 | 0.333062097 |
| ENSGALG00010007680 | 0.228761856 | 0.415214082 |
| ENSGALG00010007683 | 0.313956645 | 0.130146002 |
| ENSGALG00010007686 | 0.388534291 | 0.330847295 |
| ENSGALG00010007688 | 0.262922434 | 0.138601464 |
| ENSGALG00010007691 | 0.134692884 | 0.311757208 |
| ENSGALG00010007692 | 0.844854404 | 0.214077082 |
| ENSGALG00010007695 | 0.347737515 | 0.045178685 |
| ENSGALG00010007696 | 0.576224561 | 0.243582763 |
| ENSGALG00010007697 | 0.533197418 | 0.156567823 |
| ENSGALG00010007698 | 0.272389393 | 0.046079649 |
| ENSGALG00010007699 | 0.577742306 | 0.053508435 |
| ENSGALG00010007700 | 0.479262553 | 0.144177318 |
| ENSGALG00010007701 | 0.472731913 | 0.10040291  |
| ENSGALG00010007702 | 0.200994087 | 0.16470463  |
| ENSGALG00010007703 | 0.033179125 | 0.179639579 |
| ENSGALG00010007704 | 0.354984028 | 0.356984247 |
| ENSGALG00010007705 | 0.617338842 | 0.147469657 |
| ENSGALG00010007707 | 0.95486257  | 0.330762801 |
| ENSGALG00010007708 | 0.977750608 | 0.332934537 |
| ENSGALG00010007709 | 0.644816436 | 0.028774268 |
| ENSGALG00010007710 | 0.826761421 | 0.190941712 |
| ENSGALG00010007712 | 0.908920926 | 0.265894522 |
| ENSGALG00010007713 | 0.912488079 | 0.252184891 |
| ENSGALG00010007718 | 0.408177236 | 0.304504012 |
| ENSGALG00010007719 | 0.41227023  | 0.031837949 |
| ENSGALG00010007721 | 0.904909975 | 0.587363463 |
| ENSGALG00010007723 | 0.448953241 | 0.357398828 |
| ENSGALG00010007724 | 0.844597411 | 0.092890715 |
| ENSGALG00010007727 | 0.685609513 | 0.118631971 |
| ENSGALG00010007730 | 0.934218209 | 0.430836262 |
| ENSGALG00010007731 | 0.730227506 | 0.328015971 |
| ENSGALG00010007734 | 0.145065728 | 0.186475454 |
| ENSGALG00010007739 | 0.4576733   | 0.097565236 |
| ENSGALG00010007741 | 0.957497381 | 0.4234278   |
| ENSGALG00010007748 | 0.567184382 | 0.224913536 |
| ENSGALG00010007751 | 0.972897459 | 0.37193886  |
| ENSGALG00010007752 | 0.700348977 | 0.096576503 |
| ENSGALG00010007753 | 0.950375978 | 0.382757593 |

|                    |             |             |
|--------------------|-------------|-------------|
| ENSGALG00010007755 | 0.031885131 | 0.218976498 |
| ENSGALG00010007756 | 0.10756773  | 0.15878395  |
| ENSGALG00010007758 | 0.953785424 | 0.263858327 |
| ENSGALG00010007759 | 0.994977544 | 0.335475957 |
| ENSGALG00010007760 | 0.016813969 | 0.1840436   |
| ENSGALG00010007761 | 0.758500163 | 0.028567891 |
| ENSGALG00010007762 | 0.874289691 | 0.11892508  |
| ENSGALG00010007763 | 0.927860449 | 0.235758552 |
| ENSGALG00010007764 | 0.11758128  | 0.23184693  |
| ENSGALG00010007765 | 0.297956472 | 0.220467392 |
| ENSGALG00010007766 | 0.693118207 | 0.100222836 |
| ENSGALG00010007767 | 0.308371994 | 0.339084058 |
| ENSGALG00010007768 | 0.87330332  | 0.232818846 |
| ENSGALG00010007769 | 0.939951218 | 0.275696321 |
| ENSGALG00010007770 | 0.662639212 | 0.272920127 |
| ENSGALG00010007771 | 0.293907584 | 0.147174991 |
| ENSGALG00010007774 | 0.197106861 | 0.158968576 |
| ENSGALG00010007775 | 0.508410985 | 0.359662118 |
| ENSGALG00010007776 | 0.943612342 | 0.341883032 |
| ENSGALG00010007777 | 0.938426125 | 0.370450974 |
| ENSGALG00010007779 | 0.702918403 | 0.213239038 |
| ENSGALG00010007780 | 0.934503608 | 0.375806982 |
| ENSGALG00010007781 | 0.434469745 | 0.16547294  |
| ENSGALG00010007782 | 0.456399251 | 0.11287433  |
| ENSGALG00010007783 | 0.798761598 | 0.221880023 |
| ENSGALG00010007784 | 0.686080886 | 0.332361056 |
| ENSGALG00010007786 | 0.964564926 | 0.43817223  |
| ENSGALG00010007787 | 0.39269743  | 0.258005655 |
| ENSGALG00010007788 | 0.705548599 | 0.310979481 |
| ENSGALG00010007789 | 0.265667322 | 0.157928229 |
| ENSGALG00010007792 | 0.872834051 | 0.378283408 |
| ENSGALG00010007793 | 0.340226296 | 0.222832747 |
| ENSGALG00010007795 | 0.74179348  | 0.472229222 |
| ENSGALG00010007796 | 0.913892237 | 0.184349769 |
| ENSGALG00010007797 | 0.481688014 | 0.023718441 |
| ENSGALG00010007798 | 0.931138147 | 0.275297559 |
| ENSGALG00010007799 | 0.728270292 | 0.300567617 |
| ENSGALG00010007800 | 0.934727316 | 0.260294159 |
| ENSGALG00010007801 | 0.962361894 | 0.267931154 |
| ENSGALG00010007802 | 0.591654779 | 0.503879988 |
| ENSGALG00010007803 | 0.98869251  | 0.299068521 |
| ENSGALG00010007804 | 0.208550923 | 0.676301294 |
| ENSGALG00010007805 | 0.353514384 | 0.42379427  |
| ENSGALG00010007806 | 0.868898801 | 0.466404897 |
| ENSGALG00010007807 | 0.364065872 | 0.140159288 |
| ENSGALG00010007809 | 0.871452564 | 0.327284946 |
| ENSGALG00010007811 | 0.531957233 | 0.081190198 |
| ENSGALG00010007812 | 0.155064993 | 0.10498163  |
| ENSGALG00010007817 | 0.878532007 | 0.332057285 |
| ENSGALG00010007818 | 0.647851328 | 0.253208857 |
| ENSGALG00010007819 | 0.162650696 | 0.01114347  |
| ENSGALG00010007821 | 0.350044542 | 0.037157583 |
| ENSGALG00010007824 | 0.386114539 | 0.074004299 |
| ENSGALG00010007826 | 0.378577426 | 0.095614252 |
| ENSGALG00010007830 | 0.967662892 | 0.342984326 |
| ENSGALG00010007831 | 0.386940806 | 0.06873218  |

|                    |             |             |
|--------------------|-------------|-------------|
| ENSGALG00010007835 | 0.9260776   | 0.353289968 |
| ENSGALG00010007841 | 0.394927857 | 0.119113854 |
| ENSGALG00010007846 | 0.33314852  | 0.227716081 |
| ENSGALG00010007847 | 0.958861052 | 0.256866082 |
| ENSGALG00010007849 | 0.991859484 | 0.398030145 |
| ENSGALG00010007850 | 0.947373001 | 0.201134699 |
| ENSGALG00010007851 | 0.946765999 | 0.305405911 |
| ENSGALG00010007852 | 0.453340525 | 0.019342708 |
| ENSGALG00010007853 | 0.968724859 | 0.338091806 |
| ENSGALG00010007854 | 0.954539022 | 0.331731752 |
| ENSGALG00010007856 | 0.934613832 | 0.182450305 |
| ENSGALG00010007857 | 0.71768638  | 0.631858088 |
| ENSGALG00010007859 | 0.472827009 | 0.029892722 |
| ENSGALG00010007860 | 0.938982954 | 0.299610818 |
| ENSGALG00010007861 | 0.217461377 | 0.487387806 |
| ENSGALG00010007862 | 0.175817499 | 0.599094588 |
| ENSGALG00010007863 | 0.888452867 | 0.300680998 |
| ENSGALG00010007865 | 0.502597554 | 0.114547379 |
| ENSGALG00010007866 | 0.514515547 | 0.017351798 |
| ENSGALG00010007867 | 0.555423871 | 0.166992143 |
| ENSGALG00010007868 | 0.944379275 | 0.348065378 |
| ENSGALG00010007869 | 0.974057804 | 0.293475662 |
| ENSGALG00010007870 | 0.631074877 | 0.181900586 |
| ENSGALG00010007871 | 0.951036189 | 0.351858671 |
| ENSGALG00010007872 | 0.470786851 | 0.189329773 |
| ENSGALG00010007873 | 0.482053965 | 0.273772015 |
| ENSGALG00010007874 | 0.845420879 | 0.442479237 |
| ENSGALG00010007875 | 0.917532997 | 0.285152167 |
| ENSGALG00010007876 | 0.498838275 | 0.165355112 |
| ENSGALG00010007877 | 0.978863444 | 0.336457957 |
| ENSGALG00010007878 | 0.953175319 | 0.379819983 |
| ENSGALG00010007879 | 0.589229123 | 0.055242411 |
| ENSGALG00010007880 | 0.964304542 | 0.424755087 |
| ENSGALG00010007881 | 0.0923187   | 0.150253598 |
| ENSGALG00010007882 | 0.90257023  | 0.483163305 |
| ENSGALG00010007883 | 0.626435054 | 0.380797566 |
| ENSGALG00010007884 | 0.138272065 | 0.007471603 |
| ENSGALG00010007885 | 0.523092574 | 0.223206692 |
| ENSGALG00010007887 | 0.286043662 | 0.197540989 |
| ENSGALG00010007888 | 0.886555818 | 0.24240996  |
| ENSGALG00010007889 | 0.988941148 | 0.29246925  |
| ENSGALG00010007890 | 0.701467535 | 0.05979234  |
| ENSGALG00010007891 | 0.127140164 | 0.010514772 |
| ENSGALG00010007892 | 0.235570677 | 0.194409353 |
| ENSGALG00010007893 | 0.512306622 | 0.20130008  |
| ENSGALG00010007894 | 0.983402027 | 0.352945098 |
| ENSGALG00010007895 | 0.980292093 | 0.327598235 |
| ENSGALG00010007896 | 0.985372471 | 0.305966455 |
| ENSGALG00010007897 | 0.835534792 | 0.530104656 |
| ENSGALG00010007898 | 0.922441845 | 0.118024111 |
| ENSGALG00010007899 | 0.069228061 | 0.054699326 |
| ENSGALG00010007900 | 0.93199602  | 0.293193994 |
| ENSGALG00010007901 | 0.393516822 | 0.238074982 |
| ENSGALG00010007902 | 0.994490482 | 0.322020426 |
| ENSGALG00010007903 | 0.205584867 | 0.026776481 |
| ENSGALG00010007904 | 0.355840211 | 0.126688245 |

|                    |             |             |
|--------------------|-------------|-------------|
| ENSGALG00010007905 | 0.082092945 | 0.021344404 |
| ENSGALG00010007906 | 0.082689054 | 0.100862593 |
| ENSGALG00010007908 | 0.285179533 | 0.121954912 |
| ENSGALG00010007909 | 0.569662204 | 0.243063501 |
| ENSGALG00010007910 | 0.034335122 | 0.18357704  |
| ENSGALG00010007911 | 0.942387648 | 0.414808864 |
| ENSGALG00010007912 | 0.409974878 | 0.096295837 |
| ENSGALG00010007913 | 0.335707684 | 0.194178786 |
| ENSGALG00010007914 | 0.900194964 | 0.143202046 |
| ENSGALG00010007915 | 0.739360325 | 0.267564144 |
| ENSGALG00010007916 | 0.676122784 | 0.092118264 |
| ENSGALG00010007917 | 0.975357039 | 0.26893358  |
| ENSGALG00010007919 | 0.085050712 | 0.180185983 |
| ENSGALG00010007920 | 0.835242699 | 0.180127099 |
| ENSGALG00010007921 | 0.957536498 | 0.257128654 |
| ENSGALG00010007922 | 0.495590222 | 0.058264282 |
| ENSGALG00010007923 | 0.110933706 | 0.181726464 |
| ENSGALG00010007924 | 0.953882627 | 0.2979934   |
| ENSGALG00010007925 | 0.916962531 | 0.342078323 |
| ENSGALG00010007926 | 0.718339996 | 0.156774384 |
| ENSGALG00010007927 | 0.976493687 | 0.303431176 |
| ENSGALG00010007928 | 0.387591403 | 0.030397751 |
| ENSGALG00010007929 | 0.993011415 | 0.328943794 |
| ENSGALG00010007930 | 0.718391575 | 0.456914213 |
| ENSGALG00010007931 | 0.645434467 | 0.202836639 |
| ENSGALG00010007932 | 0.579959408 | 0.231826899 |
| ENSGALG00010007934 | 0.961144566 | 0.2215051   |
| ENSGALG00010007935 | 0.989375796 | 0.331005162 |
| ENSGALG00010007936 | 0.977360184 | 0.355057737 |
| ENSGALG00010007937 | 0.559220734 | 0.078746946 |
| ENSGALG00010007938 | 0.943234149 | 0.303839227 |
| ENSGALG00010007940 | 0.76700228  | 0.450380127 |
| ENSGALG00010007941 | 0.861335459 | 0.172332103 |
| ENSGALG00010007942 | 0.925854828 | 0.280086521 |
| ENSGALG00010007943 | 0.958355056 | 0.195522072 |
| ENSGALG00010007944 | 0.817674445 | 0.218078499 |
| ENSGALG00010007945 | 0.552551209 | 0.15040742  |
| ENSGALG00010007946 | 0.808278069 | 0.211618139 |
| ENSGALG00010007948 | 0.103699037 | 0.06317715  |
| ENSGALG00010007950 | 0.282976025 | 0.145658897 |
| ENSGALG00010007951 | 0.922237957 | 0.305888117 |
| ENSGALG00010007952 | 0.077320274 | 0.040909199 |
| ENSGALG00010007953 | 0.231025261 | 0.327597124 |
| ENSGALG00010007954 | 0.718640168 | 0.280585663 |
| ENSGALG00010007955 | 0.85376497  | 0.342812293 |
| ENSGALG00010007956 | 0.956715928 | 0.302999403 |
| ENSGALG00010007957 | 0.996418431 | 0.30879497  |
| ENSGALG00010007958 | 0.840851273 | 0.221573786 |
| ENSGALG00010007960 | 0.560135843 | 0.303166045 |
| ENSGALG00010007962 | 0.246621768 | 0.122491293 |
| ENSGALG00010007963 | 0.982987279 | 0.2564181   |
| ENSGALG00010007964 | 0.523090662 | 0.09479471  |
| ENSGALG00010007965 | 0.982920076 | 0.310123579 |
| ENSGALG00010007966 | 0.947344342 | 0.474868781 |
| ENSGALG00010007968 | 0.953594979 | 0.255393854 |
| ENSGALG00010007970 | 0.838575625 | 0.328862035 |



|                    |             |             |
|--------------------|-------------|-------------|
| ENSGALG00010007972 | 0.847742722 | 0.344480772 |
| ENSGALG00010007973 | 0.675138493 | 0.089834363 |
| ENSGALG00010007975 | 0.196308861 | 0.046809973 |
| ENSGALG00010007976 | 0.373998094 | 0.048098552 |
| ENSGALG00010007977 | 0.996916911 | 0.335268476 |
| ENSGALG00010007978 | 0.171443105 | 0.112276211 |
| ENSGALG00010007979 | 0.927996583 | 0.315564424 |
| ENSGALG00010007980 | 0.960135983 | 0.331574839 |
| ENSGALG00010007981 | 0.517288297 | 0.192881547 |
| ENSGALG00010007982 | 0.966168549 | 0.412280989 |
| ENSGALG00010007983 | 0.984852798 | 0.378179405 |
| ENSGALG00010007984 | 0.79010193  | 0.214775302 |
| ENSGALG00010007985 | 0.981553379 | 0.310797718 |
| ENSGALG00010007986 | 0.673766976 | 0.368800279 |
| ENSGALG00010007987 | 0.812138897 | 0.212049248 |
| ENSGALG00010007988 | 0.547581046 | 0.21697919  |
| ENSGALG00010007989 | 0.969509281 | 0.297403936 |
| ENSGALG00010007991 | 0.748959513 | 0.356632033 |
| ENSGALG00010007992 | 0.681213399 | 0.19021192  |
| ENSGALG00010007993 | 0.884072302 | 0.33632199  |
| ENSGALG00010007994 | 0.916581196 | 0.318902284 |
| ENSGALG00010007995 | 0.938463819 | 0.218889877 |
| ENSGALG00010007996 | 0.923592134 | 0.197857825 |
| ENSGALG00010007997 | 0.557689643 | 0.158494812 |
| ENSGALG00010007998 | 0.824942024 | 0.323705514 |
| ENSGALG00010007999 | 0.940667894 | 0.220049837 |
| ENSGALG00010008000 | 0.619381692 | 0.479152553 |
| ENSGALG00010008001 | 0.959523829 | 0.29783018  |
| ENSGALG00010008002 | 0.017380207 | 0.502070766 |
| ENSGALG00010008004 | 0.906373859 | 0.272728196 |
| ENSGALG00010008005 | 0.480826355 | 0.16307731  |
| ENSGALG00010008006 | 0.100232018 | 0.227182986 |
| ENSGALG00010008007 | 0.756068546 | 0.275079408 |
| ENSGALG00010008008 | 0.979749315 | 0.307932664 |
| ENSGALG00010008009 | 0.988481138 | 0.313159242 |
| ENSGALG00010008010 | 0.95827044  | 0.416740099 |
| ENSGALG00010008011 | 0.885263024 | 0.202031389 |
| ENSGALG00010008012 | 0.942132791 | 0.299700129 |
| ENSGALG00010008013 | 0.813447456 | 0.112294134 |
| ENSGALG00010008014 | 0.893638692 | 0.239817821 |
| ENSGALG00010008015 | 0.934649061 | 0.339729984 |
| ENSGALG00010008016 | 0.68150244  | 0.048914642 |
| ENSGALG00010008017 | 0.017988535 | 0.066149537 |
| ENSGALG00010008018 | 0.380435244 | 0.217241544 |
| ENSGALG00010008019 | 0.829924485 | 0.409079627 |
| ENSGALG00010008020 | 0.933652727 | 0.221575928 |
| ENSGALG00010008021 | 0.325694796 | 0.462134608 |
| ENSGALG00010008022 | 0.122995325 | 0.116113119 |
| ENSGALG00010008023 | 0.774592867 | 0.246427652 |
| ENSGALG00010008024 | 0.628103151 | 0.318016884 |
| ENSGALG00010008025 | 0.114168306 | 0.141162836 |
| ENSGALG00010008026 | 0.112560104 | 0.038188023 |
| ENSGALG00010008027 | 0.543074262 | 0.255837184 |
| ENSGALG00010008028 | 0.990704541 | 0.30867794  |
| ENSGALG00010008029 | 0.96600417  | 0.385073859 |
| ENSGALG00010008030 | 0.229289636 | 0.405972883 |

|                    |             |             |
|--------------------|-------------|-------------|
| ENSGALG00010008031 | 0.934961396 | 0.361369297 |
| ENSGALG00010008032 | 0.969093366 | 0.419183663 |
| ENSGALG00010008033 | 0.933081321 | 0.364556291 |
| ENSGALG00010008034 | 0.803134471 | 0.220160219 |
| ENSGALG00010008035 | 0.765997687 | 0.443436968 |
| ENSGALG00010008036 | 0.830686302 | 0.359099661 |
| ENSGALG00010008037 | 0.49944091  | 0.29268137  |
| ENSGALG00010008038 | 0.954191533 | 0.347680037 |
| ENSGALG00010008039 | 0.26730295  | 0.360220415 |
| ENSGALG00010008041 | 0.924503447 | 0.61249834  |
| ENSGALG00010008042 | 0.360144738 | 0.298645978 |
| ENSGALG00010008043 | 0.569938556 | 0.102353498 |
| ENSGALG00010008044 | 0.789793176 | 0.241333694 |
| ENSGALG00010008045 | 0.984828669 | 0.248695123 |
| ENSGALG00010008046 | 0.928292478 | 0.21199164  |
| ENSGALG00010008047 | 0.925966407 | 0.201217457 |
| ENSGALG00010008048 | 0.317181506 | 0.084381918 |
| ENSGALG00010008049 | 0.194621834 | 0.096222222 |
| ENSGALG00010008050 | 0.11798188  | 0.021789302 |
| ENSGALG00010008051 | 0.4679859   | 0.581900856 |
| ENSGALG00010008052 | 0.753301532 | 0.173506995 |
| ENSGALG00010008053 | 0.563541407 | 0.235649438 |
| ENSGALG00010008054 | 0.869099346 | 0.225878896 |
| ENSGALG00010008055 | 0.11900953  | 0.213026117 |
| ENSGALG00010008056 | 0.741944976 | 0.384192001 |
| ENSGALG00010008057 | 0.072275069 | 0.346198869 |
| ENSGALG00010008058 | 0.928089368 | 0.257135382 |
| ENSGALG00010008059 | 0.401306216 | 0.061753914 |
| ENSGALG00010008061 | 0.93448505  | 0.302536181 |
| ENSGALG00010008062 | 0.711794651 | 0.060349899 |
| ENSGALG00010008063 | 0.787562713 | 0.485253003 |
| ENSGALG00010008064 | 0.986230876 | 0.332340912 |
| ENSGALG00010008065 | 0.76883502  | 0.058471932 |
| ENSGALG00010008066 | 0.815810845 | 0.339561476 |
| ENSGALG00010008067 | 0.609943352 | 0.246661062 |
| ENSGALG00010008069 | 0.149231952 | 0.208920393 |
| ENSGALG00010008071 | 0.222517999 | 0.582064403 |
| ENSGALG00010008072 | 0.89131846  | 0.193462676 |
| ENSGALG00010008073 | 0.320958891 | 0.014191627 |
| ENSGALG00010008074 | 0.800956965 | 0.226670497 |
| ENSGALG00010008075 | 0.904964062 | 0.433358402 |
| ENSGALG00010008076 | 0.085869065 | 0.29826344  |
| ENSGALG00010008078 | 0.856688645 | 0.257379185 |
| ENSGALG00010008079 | 0.663317193 | 0.138160511 |
| ENSGALG00010008081 | 0.903220057 | 0.331071557 |
| ENSGALG00010008083 | 0.895692314 | 0.209269642 |
| ENSGALG00010008084 | 0.996918731 | 0.341829159 |
| ENSGALG00010008086 | 0.976042589 | 0.291835038 |
| ENSGALG00010008087 | 0.95323892  | 0.24138535  |
| ENSGALG00010008088 | 0.945026079 | 0.369981222 |
| ENSGALG00010008091 | 0.878904909 | 0.162526972 |
| ENSGALG00010008092 | 0.914751144 | 0.385941518 |
| ENSGALG00010008093 | 0.964229193 | 0.36318022  |
| ENSGALG00010008094 | 0.949852973 | 0.320410973 |
| ENSGALG00010008095 | 0.381415582 | 0.158761082 |
| ENSGALG00010008096 | 0.620966285 | 0.049823672 |

|                    |             |             |
|--------------------|-------------|-------------|
| ENSGALG00010008097 | 0.613023567 | 0.206644295 |
| ENSGALG00010008098 | 0.720861043 | 0.041646975 |
| ENSGALG00010008099 | 0.989748971 | 0.37033063  |
| ENSGALG00010008100 | 0.648083365 | 0.044677035 |
| ENSGALG00010008101 | 0.961016041 | 0.1926886   |
| ENSGALG00010008102 | 0.19832926  | 0.209269862 |
| ENSGALG00010008103 | 0.80855567  | 0.314798265 |
| ENSGALG00010008104 | 0.913990446 | 0.232272779 |
| ENSGALG00010008105 | 0.946819693 | 0.324109876 |
| ENSGALG00010008106 | 0.366466356 | 0.098299268 |
| ENSGALG00010008107 | 0.04722783  | 0.19753533  |
| ENSGALG00010008108 | 0.644716018 | 0.211194579 |
| ENSGALG00010008109 | 0.58695361  | 0.198097752 |
| ENSGALG00010008110 | 0.947356851 | 0.325439143 |
| ENSGALG00010008111 | 0.175044389 | 0.2492851   |
| ENSGALG00010008112 | 0.001230292 | 0.202444066 |
| ENSGALG00010008113 | 0.087243134 | 0.141035895 |
| ENSGALG00010008115 | 0.861401    | 0.321469818 |
| ENSGALG00010008116 | 0.980980674 | 0.246404518 |
| ENSGALG00010008117 | 0.721824354 | 0.306198203 |
| ENSGALG00010008118 | 0.628324832 | 0.162348059 |
| ENSGALG00010008119 | 0.150003191 | 0.313578112 |
| ENSGALG00010008120 | 0.8660574   | 0.183854439 |
| ENSGALG00010008121 | 0.951002206 | 0.321973637 |
| ENSGALG00010008123 | 0.03423594  | 0.010419442 |
| ENSGALG00010008124 | 0.423469538 | 0.042895477 |
| ENSGALG00010008126 | 0.888223469 | 0.520094273 |
| ENSGALG00010008127 | 0.776540077 | 0.2198111   |
| ENSGALG00010008128 | 0.46872673  | 0.315694117 |
| ENSGALG00010008129 | 0.880400894 | 0.396964398 |
| ENSGALG00010008130 | 0.339154281 | 0.129365616 |
| ENSGALG00010008132 | 0.994204331 | 0.324748356 |
| ENSGALG00010008133 | 0.365799671 | 0.267454281 |
| ENSGALG00010008134 | 0.957849159 | 0.359229269 |
| ENSGALG00010008135 | 0.864550625 | 0.466704023 |
| ENSGALG00010008136 | 0.831677555 | 0.120067434 |
| ENSGALG00010008139 | 0.415539217 | 0.230683478 |
| ENSGALG00010008140 | 0.097445731 | 0.211366078 |
| ENSGALG00010008141 | 0.859750721 | 0.223145314 |
| ENSGALG00010008142 | 0.884937484 | 0.454248241 |
| ENSGALG00010008143 | 0.937769144 | 0.34721326  |
| ENSGALG00010008144 | 0.835272174 | 0.276886669 |
| ENSGALG00010008145 | 0.885608416 | 0.163036046 |
| ENSGALG00010008146 | 0.942066127 | 0.320495735 |
| ENSGALG00010008147 | 0.919169603 | 0.173828395 |
| ENSGALG00010008148 | 0.948058797 | 0.255292056 |
| ENSGALG00010008149 | 0.814067472 | 0.427237571 |
| ENSGALG00010008150 | 0.316378889 | 0.052481458 |
| ENSGALG00010008151 | 0.97171438  | 0.321243789 |
| ENSGALG00010008152 | 0.215954767 | 0.274766132 |
| ENSGALG00010008153 | 0.877774516 | 0.30111448  |
| ENSGALG00010008154 | 0.070187365 | 0.101549555 |
| ENSGALG00010008155 | 0.621438502 | 0.358198644 |
| ENSGALG00010008156 | 0.445871714 | 0.218926265 |
| ENSGALG00010008157 | 0.981894068 | 0.307797012 |
| ENSGALG00010008158 | 0.951006099 | 0.302805749 |

|                    |             |             |
|--------------------|-------------|-------------|
| ENSGALG00010008159 | 0.917802425 | 0.168178083 |
| ENSGALG00010008160 | 0.484687057 | 0.021172625 |
| ENSGALG00010008161 | 0.917631966 | 0.327796026 |
| ENSGALG00010008162 | 0.893692958 | 0.173066277 |
| ENSGALG00010008163 | 0.03392138  | 0.257055131 |
| ENSGALG00010008164 | 0.583837899 | 0.516108946 |
| ENSGALG00010008165 | 0.923343531 | 0.190232353 |
| ENSGALG00010008166 | 0.677366662 | 0.034375979 |
| ENSGALG00010008167 | 0.926908644 | 0.324935974 |
| ENSGALG00010008168 | 0.996702936 | 0.330104367 |
| ENSGALG00010008169 | 0.763347889 | 0.085534867 |
| ENSGALG00010008170 | 0.794634063 | 0.304187265 |
| ENSGALG00010008171 | 0.817519967 | 0.321988652 |
| ENSGALG00010008172 | 0.418800386 | 0.231080396 |
| ENSGALG00010008173 | 0.620520442 | 0.109527361 |
| ENSGALG00010008174 | 0.96610658  | 0.367793222 |
| ENSGALG00010008175 | 0.398699747 | 0.271679994 |
| ENSGALG00010008176 | 0.955817672 | 0.228518051 |
| ENSGALG00010008177 | 0.988961812 | 0.291113443 |
| ENSGALG00010008178 | 0.066984897 | 0.274979709 |
| ENSGALG00010008179 | 0.897158359 | 0.372648371 |
| ENSGALG00010008180 | 0.376801876 | 0.329852003 |
| ENSGALG00010008181 | 0.938077753 | 0.2087234   |
| ENSGALG00010008182 | 0.97688494  | 0.351835392 |
| ENSGALG00010008183 | 0.434211084 | 0.217478478 |
| ENSGALG00010008184 | 0.93984524  | 0.15916154  |
| ENSGALG00010008185 | 0.859971788 | 0.472865835 |
| ENSGALG00010008186 | 0.958990417 | 0.3458583   |
| ENSGALG00010008187 | 0.956912213 | 0.359922879 |
| ENSGALG00010008188 | 0.977908816 | 0.337091858 |
| ENSGALG00010008189 | 0.744444587 | 0.257031937 |
| ENSGALG00010008190 | 0.801537573 | 0.2022804   |
| ENSGALG00010008191 | 0.519777458 | 0.341465257 |
| ENSGALG00010008192 | 0.740271281 | 0.007636016 |
| ENSGALG00010008193 | 0.018494712 | 0.235260517 |
| ENSGALG00010008194 | 0.922615934 | 0.394382295 |
| ENSGALG00010008195 | 0.974323552 | 0.311724078 |
| ENSGALG00010008196 | 0.600149308 | 0.255428276 |
| ENSGALG00010008197 | 0.976395196 | 0.198997965 |
| ENSGALG00010008198 | 0.605071765 | 0.17325594  |
| ENSGALG00010008199 | 0.930747561 | 0.294265056 |
| ENSGALG00010008200 | 0.619569472 | 0.418679056 |
| ENSGALG00010008201 | 0.903354669 | 0.292520273 |
| ENSGALG00010008202 | 0.944465429 | 0.243882182 |
| ENSGALG00010008203 | 0.314792918 | 0.170923543 |
| ENSGALG00010008204 | 0.805851629 | 0.257609165 |
| ENSGALG00010008205 | 0.942892151 | 0.311763203 |
| ENSGALG00010008206 | 0.542795175 | 0.196252614 |
| ENSGALG00010008207 | 0.902137206 | 0.299066708 |
| ENSGALG00010008208 | 0.979488803 | 0.27306084  |
| ENSGALG00010008209 | 0.85459685  | 0.274721908 |
| ENSGALG00010008210 | 0.669513857 | 0.603098273 |
| ENSGALG00010008211 | 0.926207378 | 0.407129842 |
| ENSGALG00010008212 | 0.672666981 | 0.044021808 |
| ENSGALG00010008213 | 0.844161189 | 0.194918499 |
| ENSGALG00010008214 | 0.403982221 | 0.184759805 |

|                    |             |             |
|--------------------|-------------|-------------|
| ENSGALG00010008215 | 0.992978013 | 0.346353725 |
| ENSGALG00010008216 | 0.776925541 | 0.407115339 |
| ENSGALG00010008217 | 0.984427245 | 0.33577768  |
| ENSGALG00010008218 | 0.948889631 | 0.291327865 |
| ENSGALG00010008219 | 0.722832283 | 0.204003692 |
| ENSGALG00010008220 | 0.488510741 | 0.323093055 |
| ENSGALG00010008221 | 0.920071191 | 0.328179595 |
| ENSGALG00010008222 | 0.993619718 | 0.317856782 |
| ENSGALG00010008223 | 0.632136322 | 0.133234149 |
| ENSGALG00010008224 | 0.964721336 | 0.340312709 |
| ENSGALG00010008225 | 0.229617119 | 0.080150254 |
| ENSGALG00010008226 | 0.208502343 | 0.311558725 |
| ENSGALG00010008227 | 0.512013325 | 0.051712807 |
| ENSGALG00010008228 | 0.412278842 | 0.06058923  |
| ENSGALG00010008229 | 0.715692051 | 0.205977941 |
| ENSGALG00010008230 | 0.486771277 | 0.41275408  |
| ENSGALG00010008231 | 0.926188396 | 0.372952434 |
| ENSGALG00010008232 | 0.974308149 | 0.324742612 |
| ENSGALG00010008233 | 0.89160385  | 0.462705008 |
| ENSGALG00010008234 | 0.415133953 | 0.397863136 |
| ENSGALG00010008235 | 0.752343428 | 0.276836265 |
| ENSGALG00010008236 | 0.800476776 | 0.335882182 |
| ENSGALG00010008237 | 0.385044915 | 0.110616185 |
| ENSGALG00010008238 | 0.163185093 | 0.230509085 |
| ENSGALG00010008240 | 0.369918977 | 0.172515236 |
| ENSGALG00010008241 | 0.51037783  | 0.279665214 |
| ENSGALG00010008242 | 0.980609096 | 0.327625001 |
| ENSGALG00010008243 | 0.966167084 | 0.285816576 |
| ENSGALG00010008245 | 0.896644774 | 0.291889431 |
| ENSGALG00010008246 | 0.484378003 | 0.222042391 |
| ENSGALG00010008247 | 0.860958583 | 0.246226162 |
| ENSGALG00010008248 | 0.363373896 | 0.082875218 |
| ENSGALG00010008250 | 0.973222613 | 0.388775962 |
| ENSGALG00010008251 | 0.855250406 | 0.353147207 |
| ENSGALG00010008252 | 0.97226252  | 0.273371462 |
| ENSGALG00010008253 | 0.297188989 | 0.027987018 |
| ENSGALG00010008255 | 0.905899179 | 0.29476589  |
| ENSGALG00010008257 | 0.922413824 | 0.161917489 |
| ENSGALG00010008258 | 0.917595419 | 0.28432191  |
| ENSGALG00010008259 | 0.682758806 | 0.052794751 |
| ENSGALG00010008260 | 0.388899421 | 0.120062276 |
| ENSGALG00010008261 | 0.727968721 | 0.466534204 |
| ENSGALG00010008262 | 0.945633403 | 0.462239708 |
| ENSGALG00010008263 | 0.460167639 | 0.558332402 |
| ENSGALG00010008264 | 0.550689173 | 0.033142756 |
| ENSGALG00010008265 | 0.943033014 | 0.261857716 |
| ENSGALG00010008266 | 0.961526481 | 0.335714467 |
| ENSGALG00010008267 | 0.457418933 | 0.016998845 |
| ENSGALG00010008268 | 0.866830249 | 0.345961138 |
| ENSGALG00010008270 | 0.593956601 | 0.113216994 |
| ENSGALG00010008272 | 0.925661861 | 0.441171468 |
| ENSGALG00010008273 | 0.825738269 | 0.284794084 |
| ENSGALG00010008274 | 0.925482577 | 0.27962784  |
| ENSGALG00010008275 | 0.955916778 | 0.361607487 |
| ENSGALG00010008276 | 0.968097341 | 0.323792686 |
| ENSGALG00010008277 | 0.325928283 | 0.532659218 |

|                    |             |             |
|--------------------|-------------|-------------|
| ENSGALG00010008278 | 0.953962855 | 0.26517295  |
| ENSGALG00010008279 | 0.631128581 | 0.311633578 |
| ENSGALG00010008282 | 0.917303379 | 0.276902991 |
| ENSGALG00010008283 | 0.98841633  | 0.315707621 |
| ENSGALG00010008284 | 0.873231244 | 0.327745253 |
| ENSGALG00010008285 | 0.34842739  | 0.16036542  |
| ENSGALG00010008286 | 0.939386589 | 0.342366624 |
| ENSGALG00010008287 | 0.461569218 | 0.026252786 |
| ENSGALG00010008288 | 0.021308589 | 0.164876077 |
| ENSGALG00010008289 | 0.666536235 | 0.216043203 |
| ENSGALG00010008290 | 0.69054164  | 0.311378124 |
| ENSGALG00010008291 | 0.442435039 | 0.377660189 |
| ENSGALG00010008292 | 0.974380384 | 0.422076998 |
| ENSGALG00010008293 | 0.542870646 | 0.253230077 |
| ENSGALG00010008294 | 0.938683222 | 0.294979925 |
| ENSGALG00010008295 | 0.854109521 | 0.413933906 |
| ENSGALG00010008296 | 0.96680995  | 0.296812422 |
| ENSGALG00010008298 | 0.876607282 | 0.279022946 |
| ENSGALG00010008299 | 0.875800928 | 0.345914751 |
| ENSGALG00010008300 | 0.233954101 | 0.286564822 |
| ENSGALG00010008301 | 0.984555457 | 0.370136941 |
| ENSGALG00010008302 | 0.368326215 | 0.209235812 |
| ENSGALG00010008303 | 0.896101979 | 0.408051762 |
| ENSGALG00010008305 | 0.979891642 | 0.380219282 |
| ENSGALG00010008307 | 0.146595897 | 0.244256602 |
| ENSGALG00010008308 | 0.983387751 | 0.291015689 |
| ENSGALG00010008309 | 0.777742585 | 0.337125309 |
| ENSGALG00010008310 | 0.818033603 | 0.178399392 |
| ENSGALG00010008311 | 0.301521179 | 0.009556972 |
| ENSGALG00010008312 | 0.990119266 | 0.31386291  |
| ENSGALG00010008313 | 0.986025824 | 0.30918363  |
| ENSGALG00010008314 | 0.428957726 | 0.035465533 |
| ENSGALG00010008315 | 0.264239718 | 0.073427965 |
| ENSGALG00010008316 | 0.822585372 | 0.364863333 |
| ENSGALG00010008317 | 0.796695842 | 0.412169409 |
| ENSGALG00010008318 | 0.9666354   | 0.304269917 |
| ENSGALG00010008319 | 0.776077002 | 0.562607796 |
| ENSGALG00010008320 | 0.854127113 | 0.259321354 |
| ENSGALG00010008321 | 0.953126211 | 0.316516543 |
| ENSGALG00010008323 | 0.855822354 | 0.298664502 |
| ENSGALG00010008324 | 0.935400982 | 0.232267964 |
| ENSGALG00010008325 | 0.847096059 | 0.299861816 |
| ENSGALG00010008327 | 0.727643851 | 0.139153889 |
| ENSGALG00010008330 | 0.842508598 | 0.195632559 |
| ENSGALG00010008331 | 0.912353252 | 0.345026838 |
| ENSGALG00010008332 | 0.131921507 | 0.128584882 |
| ENSGALG00010008333 | 0.836052916 | 0.172108982 |
| ENSGALG00010008334 | 0.009863359 | 0.489102725 |
| ENSGALG00010008335 | 0.862881988 | 0.251584163 |
| ENSGALG00010008336 | 0.959960144 | 0.317718981 |
| ENSGALG00010008339 | 0.338686006 | 0.124826975 |
| ENSGALG00010008340 | 0.973654735 | 0.305919237 |
| ENSGALG00010008341 | 0.875917751 | 0.241280766 |
| ENSGALG00010008342 | 0.291762351 | 0.51093649  |
| ENSGALG00010008343 | 0.040239282 | 0.010765275 |
| ENSGALG00010008344 | 0.471289152 | 0.173893333 |

|                    |             |             |
|--------------------|-------------|-------------|
| ENSGALG00010008346 | 0.645845949 | 0.645467688 |
| ENSGALG00010008347 | 0.75487337  | 0.23823989  |
| ENSGALG00010008348 | 0.074612087 | 0.077950833 |
| ENSGALG00010008349 | 0.478721866 | 0.148947923 |
| ENSGALG00010008350 | 0.122486999 | 0.059919539 |
| ENSGALG00010008351 | 0.925566309 | 0.378793717 |
| ENSGALG00010008352 | 0.961296556 | 0.352736334 |
| ENSGALG00010008354 | 0.663124921 | 0.270770704 |
| ENSGALG00010008355 | 0.986357407 | 0.339851466 |
| ENSGALG00010008356 | 0.536930426 | 0.182357667 |
| ENSGALG00010008358 | 0.645644515 | 0.295496237 |
| ENSGALG00010008360 | 0.330181657 | 0.352184146 |
| ENSGALG00010008361 | 0.868169827 | 0.339694663 |
| ENSGALG00010008362 | 0.962888587 | 0.28878513  |
| ENSGALG00010008364 | 0.509263406 | 0.123243317 |
| ENSGALG00010008366 | 0.264342283 | 0.237837915 |
| ENSGALG00010008367 | 0.002399406 | 0.006663862 |
| ENSGALG00010008368 | 0.562991205 | 0.256373294 |
| ENSGALG00010008372 | 0.89583776  | 0.311616127 |
| ENSGALG00010008373 | 0.337066473 | 0.036381618 |
| ENSGALG00010008374 | 0.401887138 | 0.178938845 |
| ENSGALG00010008375 | 0.953465271 | 0.22111572  |
| ENSGALG00010008376 | 0.394846913 | 0.04886467  |
| ENSGALG00010008377 | 0.987869507 | 0.283327839 |
| ENSGALG00010008380 | 0.901823826 | 0.297871128 |
| ENSGALG00010008381 | 0.938923608 | 0.227720262 |
| ENSGALG00010008382 | 0.625257481 | 0.094324574 |
| ENSGALG00010008383 | 0.245700908 | 0.010899108 |
| ENSGALG00010008385 | 0.944053541 | 0.254327316 |
| ENSGALG00010008386 | 0.951091045 | 0.249264132 |
| ENSGALG00010008387 | 0.18719348  | 0.122453904 |
| ENSGALG00010008388 | 0.931485782 | 0.238826966 |
| ENSGALG00010008389 | 0.861553726 | 0.237239385 |
| ENSGALG00010008390 | 0.023279831 | 0.134374301 |
| ENSGALG00010008391 | 0.924937076 | 0.375112047 |
| ENSGALG00010008392 | 0.966367628 | 0.261922602 |
| ENSGALG00010008394 | 0.977350178 | 0.273637345 |
| ENSGALG00010008395 | 0.881390685 | 0.440270077 |
| ENSGALG00010008396 | 0.169812106 | 0.388906214 |
| ENSGALG00010008397 | 0.47773829  | 0.324016024 |
| ENSGALG00010008399 | 0.746780809 | 0.404540979 |
| ENSGALG00010008400 | 0.775812717 | 0.260356913 |
| ENSGALG00010008401 | 0.983856004 | 0.310910544 |
| ENSGALG00010008403 | 0.358009916 | 0.179963489 |
| ENSGALG00010008405 | 0.953405277 | 0.306832412 |
| ENSGALG00010008407 | 0.472922076 | 0.338563902 |
| ENSGALG00010008408 | 0.966893742 | 0.22234897  |
| ENSGALG00010008409 | 0.978985031 | 0.275956514 |
| ENSGALG00010008410 | 0.97506949  | 0.336081972 |
| ENSGALG00010008412 | 0.139983943 | 0.294014143 |
| ENSGALG00010008415 | 0.455566134 | 0.136190511 |
| ENSGALG00010008416 | 0.04078883  | 0.20203698  |
| ENSGALG00010008417 | 0.962048017 | 0.332709886 |
| ENSGALG00010008418 | 0.942420598 | 0.327246771 |
| ENSGALG00010008419 | 0.022881441 | 0.138844183 |
| ENSGALG00010008422 | 0.624252897 | 0.045304355 |

|                    |             |             |
|--------------------|-------------|-------------|
| ENSGALG00010008424 | 0.960839509 | 0.32223127  |
| ENSGALG00010008425 | 0.667431839 | 0.419956753 |
| ENSGALG00010008426 | 0.991980264 | 0.345358761 |
| ENSGALG00010008428 | 0.762586514 | 0.090806779 |
| ENSGALG00010008429 | 0.987551239 | 0.305099328 |
| ENSGALG00010008431 | 0.364078712 | 0.17553523  |
| ENSGALG00010008432 | 0.271701261 | 0.072417625 |
| ENSGALG00010008433 | 0.759628596 | 0.213261292 |
| ENSGALG00010008437 | 0.939320037 | 0.362078465 |
| ENSGALG00010008438 | 0.884443558 | 0.157766845 |
| ENSGALG00010008441 | 0.929071091 | 0.422642359 |
| ENSGALG00010008442 | 0.905031888 | 0.32445949  |
| ENSGALG00010008443 | 0.936619791 | 0.285541708 |
| ENSGALG00010008444 | 0.697984877 | 0.027258693 |
| ENSGALG00010008447 | 0.237241526 | 0.009594709 |
| ENSGALG00010008448 | 0.923605013 | 0.450832881 |
| ENSGALG00010008449 | 0.580666081 | 0.115480185 |
| ENSGALG00010008450 | 0.822934834 | 0.054721465 |
| ENSGALG00010008451 | 0.70911083  | 0.00080868  |
| ENSGALG00010008453 | 0.986038047 | 0.358674312 |
| ENSGALG00010008455 | 0.909912835 | 0.346280866 |
| ENSGALG00010008456 | 0.950696397 | 0.272845987 |
| ENSGALG00010008457 | 0.982915383 | 0.320013202 |
| ENSGALG00010008459 | 0.982916279 | 0.373086646 |
| ENSGALG00010008460 | 0.705608967 | 0.222457637 |
| ENSGALG00010008464 | 0.004399529 | 0.086172557 |
| ENSGALG00010008466 | 0.6536709   | 0.286818172 |
| ENSGALG00010008467 | 0.189240572 | 0.04996112  |
| ENSGALG00010008468 | 0.657209762 | 0.278627832 |
| ENSGALG00010008469 | 0.868192503 | 0.330293214 |
| ENSGALG00010008470 | 0.761000558 | 0.290112319 |
| ENSGALG00010008473 | 0.390615778 | 0.13423307  |
| ENSGALG00010008474 | 0.972509878 | 0.409510743 |
| ENSGALG00010008475 | 0.639126502 | 0.38450568  |
| ENSGALG00010008476 | 0.798824084 | 0.257808976 |
| ENSGALG00010008479 | 0.581137707 | 0.711775215 |
| ENSGALG00010008480 | 0.491519158 | 0.111732976 |
| ENSGALG00010008483 | 0.438816874 | 0.253738372 |
| ENSGALG00010008484 | 0.05197934  | 0.14495833  |
| ENSGALG00010008485 | 0.230507588 | 0.31416683  |
| ENSGALG00010008486 | 0.856918908 | 0.113965971 |
| ENSGALG00010008488 | 0.916363785 | 0.243503343 |
| ENSGALG00010008491 | 0.71703083  | 0.063872337 |
| ENSGALG00010008492 | 0.949618058 | 0.307442068 |
| ENSGALG00010008493 | 0.203991683 | 0.058221925 |
| ENSGALG00010008494 | 0.295245823 | 0.130519728 |
| ENSGALG00010008496 | 0.265558089 | 0.028821141 |
| ENSGALG00010008497 | 0.989486678 | 0.296772997 |
| ENSGALG00010008498 | 0.991976079 | 0.306064725 |
| ENSGALG00010008500 | 0.886712724 | 0.236796556 |
| ENSGALG00010008501 | 0.86092593  | 0.191702837 |
| ENSGALG00010008504 | 0.632801987 | 0.273893536 |
| ENSGALG00010008505 | 0.975628976 | 0.37891371  |
| ENSGALG00010008509 | 0.915885973 | 0.28940429  |
| ENSGALG00010008511 | 0.522446629 | 0.160523389 |
| ENSGALG00010008514 | 0.961781787 | 0.356608659 |



|                    |             |             |
|--------------------|-------------|-------------|
| ENSGALG00010008515 | 0.967320567 | 0.286666527 |
| ENSGALG00010008516 | 0.206720924 | 0.053170894 |
| ENSGALG00010008517 | 0.529255843 | 0.069610101 |
| ENSGALG00010008518 | 0.534888567 | 0.379747017 |
| ENSGALG00010008522 | 0.884924656 | 0.34755419  |
| ENSGALG00010008524 | 0.379306892 | 0.160819793 |
| ENSGALG00010008527 | 0.966532752 | 0.29279665  |
| ENSGALG00010008529 | 0.496785806 | 0.096342124 |
| ENSGALG00010008531 | 0.482497705 | 0.120500368 |
| ENSGALG00010008532 | 0.265558089 | 0.028821141 |
| ENSGALG00010008534 | 0.94472076  | 0.327825722 |
| ENSGALG00010008539 | 0.671188156 | 0.501160398 |
| ENSGALG00010008541 | 0.408304034 | 0.246578583 |
| ENSGALG00010008542 | 0.884304796 | 0.315272437 |
| ENSGALG00010008543 | 0.76634944  | 0.275111923 |
| ENSGALG00010008545 | 0.266137114 | 0.107784983 |
| ENSGALG00010008546 | 0.301015495 | 0.244106305 |
| ENSGALG00010008547 | 0.042991981 | 0.309911724 |
| ENSGALG00010008549 | 0.075305495 | 0.173273445 |
| ENSGALG00010008551 | 0.295598961 | 0.069390962 |
| ENSGALG00010008553 | 0.409436406 | 0.157934013 |
| ENSGALG00010008554 | 0.302909646 | 0.324236094 |
| ENSGALG00010008556 | 0.597100545 | 0.237620275 |
| ENSGALG00010008558 | 0.198227915 | 0.250666602 |
| ENSGALG00010008561 | 0.964374771 | 0.329278832 |
| ENSGALG00010008562 | 0.753258371 | 0.056214588 |
| ENSGALG00010008564 | 0.535461441 | 0.377569143 |
| ENSGALG00010008566 | 0.546120817 | 0.196121746 |
| ENSGALG00010008567 | 0.10532374  | 0.617624974 |
| ENSGALG00010008568 | 0.590420055 | 0.297346176 |
| ENSGALG00010008574 | 0.067084919 | 0.130961    |
| ENSGALG00010008575 | 0.097600593 | 0.180811099 |
| ENSGALG00010008578 | 0.266137114 | 0.107784983 |
| ENSGALG00010008579 | 0.218648951 | 0.113340634 |
| ENSGALG00010008580 | 0.861116071 | 0.396511411 |
| ENSGALG00010008584 | 0.586815662 | 0.36998166  |
| ENSGALG00010008586 | 0.163247233 | 0.166988212 |
| ENSGALG00010008588 | 0.684098561 | 0.266296669 |
| ENSGALG00010008592 | 0.673159528 | 0.209471113 |
| ENSGALG00010008596 | 0.974064096 | 0.358661319 |
| ENSGALG00010008597 | 0.0772958   | 0.130599182 |
| ENSGALG00010008598 | 0.787791642 | 0.287949079 |
| ENSGALG00010008600 | 0.342343757 | 0.168268007 |
| ENSGALG00010008601 | 0.266137114 | 0.107784983 |
| ENSGALG00010008604 | 0.433997862 | 0.100788281 |
| ENSGALG00010008618 | 0.828137502 | 0.055486726 |
| ENSGALG00010008619 | 0.279979046 | 0.096064068 |
| ENSGALG00010008620 | 0.220110391 | 0.123050157 |
| ENSGALG00010008622 | 0.189240572 | 0.04996112  |
| ENSGALG00010008623 | 0.718761915 | 0.286178017 |
| ENSGALG00010008627 | 0.401639624 | 0.101384476 |
| ENSGALG00010008628 | 0.372815743 | 0.037819372 |
| ENSGALG00010008634 | 0.151250299 | 0.401354686 |
| ENSGALG00010008636 | 0.967129985 | 0.255196474 |
| ENSGALG00010008640 | 0.490870766 | 0.189406675 |
| ENSGALG00010008641 | 0.467661517 | 0.293794448 |

|                    |             |             |
|--------------------|-------------|-------------|
| ENSGALG00010008648 | 0.270451009 | 0.090541667 |
| ENSGALG00010008649 | 0.334482024 | 0.206505972 |
| ENSGALG00010008652 | 0.861692707 | 0.343512516 |
| ENSGALG00010008653 | 0.843990655 | 0.359422417 |
| ENSGALG00010008656 | 0.96454596  | 0.260324841 |
| ENSGALG00010008658 | 0.845538318 | 0.421679178 |
| ENSGALG00010008661 | 0.387374433 | 0.109360451 |
| ENSGALG00010008664 | 0.996886503 | 0.335458603 |
| ENSGALG00010008665 | 0.493482049 | 0.177216653 |
| ENSGALG00010008666 | 0.931322395 | 0.210963535 |
| ENSGALG00010008668 | 0.385364039 | 0.072330531 |
| ENSGALG00010008669 | 0.218289073 | 0.253940806 |
| ENSGALG00010008671 | 0.277458611 | 0.137642943 |
| ENSGALG00010008672 | 0.381238997 | 0.166698879 |
| ENSGALG00010008674 | 0.839792709 | 0.195591719 |
| ENSGALG00010008675 | 0.270451009 | 0.090541667 |
| ENSGALG00010008676 | 0.907174091 | 0.178705703 |
| ENSGALG00010008677 | 0.864577527 | 0.303004378 |
| ENSGALG00010008678 | 0.173587358 | 0.223125021 |
| ENSGALG00010008679 | 0.06217773  | 0.089667239 |
| ENSGALG00010008680 | 0.390466756 | 0.106163828 |
| ENSGALG00010008681 | 0.55543884  | 0.566168681 |
| ENSGALG00010008682 | 0.262922434 | 0.138601464 |
| ENSGALG00010008683 | 0.798621746 | 0.17043442  |
| ENSGALG00010008685 | 0.390466756 | 0.106163828 |
| ENSGALG00010008686 | 0.480679297 | 0.003136748 |
| ENSGALG00010008688 | 0.017710855 | 0.378042089 |
| ENSGALG00010008690 | 0.930423171 | 0.364917294 |
| ENSGALG00010008691 | 0.511264752 | 0.043217369 |
| ENSGALG00010008693 | 0.977674611 | 0.333987298 |
| ENSGALG00010008694 | 0.475295296 | 0.169104794 |
| ENSGALG00010008695 | 0.929377835 | 0.291520101 |
| ENSGALG00010008696 | 0.848816876 | 0.213526723 |
| ENSGALG00010008697 | 0.859270688 | 0.302904463 |
| ENSGALG00010008698 | 0.283109645 | 0.065474856 |
| ENSGALG00010008699 | 0.933925066 | 0.246175055 |
| ENSGALG00010008700 | 0.925262766 | 0.159928901 |
| ENSGALG00010008701 | 0.48290496  | 0.151973614 |
| ENSGALG00010008702 | 0.72360016  | 0.333820157 |
| ENSGALG00010008705 | 0.621539725 | 0.239924439 |
| ENSGALG00010008706 | 0.826775    | 0.293550008 |
| ENSGALG00010008708 | 0.91054215  | 0.253494434 |
| ENSGALG00010008709 | 0.561463235 | 0.160924768 |
| ENSGALG00010008710 | 0.25106244  | 0.22916411  |
| ENSGALG00010008711 | 0.370314901 | 0.115441211 |
| ENSGALG00010008712 | 0.37996605  | 0.103859099 |
| ENSGALG00010008713 | 0.742390918 | 0.125751375 |
| ENSGALG00010008716 | 0.915963183 | 0.32410085  |
| ENSGALG00010008717 | 0.925647354 | 0.375634124 |
| ENSGALG00010008718 | 0.863064187 | 0.393811237 |
| ENSGALG00010008719 | 0.954679197 | 0.375407776 |
| ENSGALG00010008721 | 0.97469113  | 0.305001045 |
| ENSGALG00010008724 | 0.444938797 | 0.224439585 |
| ENSGALG00010008726 | 0.398350651 | 0.147430316 |
| ENSGALG00010008728 | 0.861890732 | 0.330187184 |
| ENSGALG00010008729 | 0.986677444 | 0.285882018 |

|                    |             |             |
|--------------------|-------------|-------------|
| ENSGALG00010008731 | 0.629755756 | 0.243694227 |
| ENSGALG00010008732 | 0.356901954 | 0.14624352  |
| ENSGALG00010008733 | 0.826181311 | 0.170253991 |
| ENSGALG00010008737 | 0.180620012 | 0.198088429 |
| ENSGALG00010008739 | 0.567432275 | 0.011159964 |
| ENSGALG00010008741 | 0.086625756 | 0.174264531 |
| ENSGALG00010008742 | 0.648936393 | 0.352559223 |
| ENSGALG00010008743 | 0.131865323 | 0.089022932 |
| ENSGALG00010008744 | 0.137923671 | 0.201947156 |
| ENSGALG00010008745 | 0.965980011 | 0.274767935 |
| ENSGALG00010008746 | 0.232768793 | 0.23416579  |
| ENSGALG00010008749 | 0.409530736 | 0.203856835 |
| ENSGALG00010008750 | 0.881439388 | 0.208500697 |
| ENSGALG00010008751 | 0.574437747 | 0.202564113 |
| ENSGALG00010008752 | 0.191188815 | 0.06387782  |
| ENSGALG00010008754 | 0.187514554 | 0.108479243 |
| ENSGALG00010008756 | 0.628062093 | 0.372757773 |
| ENSGALG00010008758 | 0.295081293 | 0.447565639 |
| ENSGALG00010008760 | 0.034060073 | 0.094660884 |
| ENSGALG00010008761 | 0.301937873 | 0.006398703 |
| ENSGALG00010008762 | 0.851993058 | 0.280342545 |
| ENSGALG00010008764 | 0.875961958 | 0.359323727 |
| ENSGALG00010008765 | 0.7012158   | 0.324237811 |
| ENSGALG00010008767 | 0.739309775 | 0.478409677 |
| ENSGALG00010008768 | 0.933139099 | 0.260790142 |
| ENSGALG00010008770 | 0.628630064 | 0.172298878 |
| ENSGALG00010008774 | 0.841998934 | 0.233580936 |
| ENSGALG00010008775 | 0.127561638 | 0.277153751 |
| ENSGALG00010008777 | 0.456332809 | 0.096071558 |
| ENSGALG00010008778 | 0.580821958 | 0.26072042  |
| ENSGALG00010008780 | 0.729392557 | 0.200964658 |
| ENSGALG00010008782 | 0.685013059 | 0.056816472 |
| ENSGALG00010008786 | 0.172500532 | 0.269492389 |
| ENSGALG00010008790 | 0.908638502 | 0.254790708 |
| ENSGALG00010008793 | 0.958955969 | 0.277153458 |
| ENSGALG00010008796 | 0.751707923 | 0.246238804 |
| ENSGALG00010008799 | 0.26643896  | 0.078371307 |
| ENSGALG00010008801 | 0.292709036 | 0.327963953 |
| ENSGALG00010008805 | 0.1626469   | 0.335039682 |
| ENSGALG00010008807 | 0.86382439  | 0.486616667 |
| ENSGALG00010008810 | 0.109906753 | 0.22849301  |
| ENSGALG00010008811 | 0.93610474  | 0.351726517 |
| ENSGALG00010008813 | 0.561916299 | 0.19614748  |
| ENSGALG00010008814 | 0.91298317  | 0.235279898 |
| ENSGALG00010008815 | 0.422928843 | 0.025570081 |
| ENSGALG00010008816 | 0.599016573 | 0.365352256 |
| ENSGALG00010008818 | 0.194830451 | 0.191307586 |
| ENSGALG00010008820 | 0.219386918 | 0.079388121 |
| ENSGALG00010008821 | 0.923477573 | 0.444181007 |
| ENSGALG00010008822 | 0.630058538 | 0.293644221 |
| ENSGALG00010008824 | 0.404159456 | 0.225719224 |
| ENSGALG00010008825 | 0.71144556  | 0.289335128 |
| ENSGALG00010008826 | 0.223229419 | 0.032312808 |
| ENSGALG00010008829 | 0.522311319 | 0.096645298 |
| ENSGALG00010008830 | 0.943511347 | 0.240748726 |
| ENSGALG00010008831 | 0.194670287 | 0.019616138 |

|                    |             |             |
|--------------------|-------------|-------------|
| ENSGALG00010008832 | 0.9851585   | 0.326463054 |
| ENSGALG00010008836 | 0.696463752 | 0.014960071 |
| ENSGALG00010008837 | 0.169116601 | 0.299384436 |
| ENSGALG00010008838 | 0.383549736 | 0.180028334 |
| ENSGALG00010008839 | 0.84375514  | 0.339189814 |
| ENSGALG00010008842 | 0.325918446 | 0.235232335 |
| ENSGALG00010008844 | 0.434525696 | 0.274241029 |
| ENSGALG00010008845 | 0.006860602 | 0.03125996  |
| ENSGALG00010008846 | 0.506663035 | 0.225484089 |
| ENSGALG00010008847 | 0.198048631 | 0.177023802 |
| ENSGALG00010008848 | 0.066222657 | 0.269018252 |
| ENSGALG00010008850 | 0.580156999 | 0.34445604  |
| ENSGALG00010008852 | 0.985249571 | 0.343470861 |
| ENSGALG00010008854 | 0.754866523 | 0.231803077 |
| ENSGALG00010008857 | 0.027569167 | 0.176120446 |
| ENSGALG00010008859 | 0.078697228 | 0.192091108 |
| ENSGALG00010008860 | 0.946978013 | 0.177925207 |
| ENSGALG00010008861 | 0.381741179 | 0.07825054  |
| ENSGALG00010008862 | 0.065331766 | 0.130038622 |
| ENSGALG00010008864 | 0.204752133 | 0.034519469 |
| ENSGALG00010008866 | 0.871116515 | 0.420928837 |
| ENSGALG00010008867 | 0.682031616 | 0.452980769 |
| ENSGALG00010008869 | 0.050564    | 0.120729262 |
| ENSGALG00010008871 | 0.51381439  | 0.327606089 |
| ENSGALG00010008872 | 0.235025311 | 0.029910414 |
| ENSGALG00010008876 | 0.402974961 | 0.000449976 |
| ENSGALG00010008877 | 0.59240741  | 0.038200881 |
| ENSGALG00010008879 | 0.596360374 | 0.160708667 |
| ENSGALG00010008880 | 0.285035043 | 0.405216513 |
| ENSGALG00010008884 | 0.067933951 | 0.099990697 |
| ENSGALG00010008886 | 0.265558089 | 0.028821141 |
| ENSGALG00010008888 | 0.963397939 | 0.327662715 |
| ENSGALG00010008892 | 0.338070107 | 0.207358644 |
| ENSGALG00010008893 | 0.985940753 | 0.345245814 |
| ENSGALG00010008894 | 0.507817099 | 0.166841031 |
| ENSGALG00010008895 | 0.645459438 | 0.302482662 |
| ENSGALG00010008896 | 0.534902397 | 0.215247488 |
| ENSGALG00010008897 | 0.345273886 | 0.267769067 |
| ENSGALG00010008899 | 0.159301598 | 0.292122312 |
| ENSGALG00010008901 | 0.389933649 | 0.180873577 |
| ENSGALG00010008902 | 0.953624467 | 0.336894746 |
| ENSGALG00010008903 | 0.878491622 | 0.390871132 |
| ENSGALG00010008904 | 0.386699547 | 0.186313031 |
| ENSGALG00010008905 | 0.451358035 | 0.324446957 |
| ENSGALG00010008906 | 0.939244053 | 0.403939409 |
| ENSGALG00010008907 | 0.531495858 | 0.200002318 |
| ENSGALG00010008909 | 0.653392824 | 0.141407499 |
| ENSGALG00010008910 | 0.25522022  | 0.145054902 |
| ENSGALG00010008918 | 0.78086175  | 0.537880896 |
| ENSGALG00010008919 | 0.013910379 | 0.356198279 |
| ENSGALG00010008921 | 0.948990824 | 0.318020957 |
| ENSGALG00010008923 | 0.37663102  | 0.133050909 |
| ENSGALG00010008926 | 0.393904719 | 0.246885565 |
| ENSGALG00010008927 | 0.132042346 | 0.158277128 |
| ENSGALG00010008928 | 0.499761322 | 0.155475493 |
| ENSGALG00010008929 | 0.095432038 | 0.329020021 |

|                    |             |             |
|--------------------|-------------|-------------|
| ENSGALG00010008931 | 0.939079412 | 0.412605286 |
| ENSGALG00010008932 | 0.654411847 | 0.108278647 |
| ENSGALG00010008934 | 0.265558089 | 0.028821141 |
| ENSGALG00010008935 | 0.936261615 | 0.302728636 |
| ENSGALG00010008936 | 0.43100393  | 0.04868432  |
| ENSGALG00010008938 | 0.850964424 | 0.32979689  |
| ENSGALG00010008939 | 0.966009453 | 0.245149281 |
| ENSGALG00010008941 | 0.156062592 | 0.022622794 |
| ENSGALG00010008942 | 0.697735063 | 0.28254601  |
| ENSGALG00010008943 | 0.241181267 | 0.029233134 |
| ENSGALG00010008944 | 0.216433634 | 0.680598293 |
| ENSGALG00010008945 | 0.821684952 | 0.237522252 |
| ENSGALG00010008946 | 0.476819387 | 0.095007482 |
| ENSGALG00010008947 | 0.859537531 | 0.15540554  |
| ENSGALG00010008952 | 0.056612317 | 0.337435458 |
| ENSGALG00010008953 | 0.187514554 | 0.108479243 |
| ENSGALG00010008955 | 0.961449505 | 0.251829358 |
| ENSGALG00010008956 | 0.517378115 | 0.261071918 |
| ENSGALG00010008960 | 0.992614623 | 0.320272381 |
| ENSGALG00010008961 | 0.38718504  | 0.101838932 |
| ENSGALG00010008964 | 0.195466331 | 0.209451297 |
| ENSGALG00010008966 | 0.951084565 | 0.384360489 |
| ENSGALG00010008967 | 0.271701261 | 0.072417625 |
| ENSGALG00010008968 | 0.301227792 | 0.223805313 |
| ENSGALG00010008969 | 0.890130545 | 0.328671239 |
| ENSGALG00010008970 | 0.324228994 | 0.202759031 |
| ENSGALG00010008971 | 0.955718125 | 0.350754127 |
| ENSGALG00010008974 | 0.64747707  | 0.20221845  |
| ENSGALG00010008979 | 0.277566769 | 0.107857127 |
| ENSGALG00010008980 | 0.394494248 | 0.128304162 |
| ENSGALG00010008983 | 0.477512283 | 0.45573071  |
| ENSGALG00010008986 | 0.394327047 | 0.133628127 |
| ENSGALG00010008988 | 0.928100116 | 0.325572553 |
| ENSGALG00010008989 | 0.722362137 | 0.234846114 |
| ENSGALG00010008991 | 0.963631514 | 0.300685077 |
| ENSGALG00010008992 | 0.573828609 | 0.185476752 |
| ENSGALG00010008994 | 0.367968282 | 0.418756987 |
| ENSGALG00010008995 | 0.861135341 | 0.505714848 |
| ENSGALG00010008996 | 0.816926461 | 0.415184754 |
| ENSGALG00010008997 | 0.914672671 | 0.275723792 |
| ENSGALG00010008999 | 0.955987808 | 0.357665693 |
| ENSGALG00010009000 | 0.944748236 | 0.310027513 |
| ENSGALG00010009002 | 0.992845076 | 0.370049387 |
| ENSGALG00010009003 | 0.971093984 | 0.271071339 |
| ENSGALG00010009007 | 0.842697283 | 0.442781531 |
| ENSGALG00010009010 | 0.917282102 | 0.164716352 |
| ENSGALG00010009011 | 0.921442449 | 0.303483954 |
| ENSGALG00010009012 | 0.003409832 | 0.095139971 |
| ENSGALG00010009013 | 0.156069065 | 0.101634428 |
| ENSGALG00010009014 | 0.972721473 | 0.333187145 |
| ENSGALG00010009015 | 0.955935637 | 0.367985862 |
| ENSGALG00010009016 | 0.455729238 | 0.18353218  |
| ENSGALG00010009018 | 0.526600511 | 0.214217539 |
| ENSGALG00010009019 | 0.975854364 | 0.338020116 |
| ENSGALG00010009020 | 0.915308388 | 0.252963571 |
| ENSGALG00010009021 | 0.987653965 | 0.341757251 |

|                    |             |             |
|--------------------|-------------|-------------|
| ENSGALG00010009022 | 0.386114539 | 0.074004299 |
| ENSGALG00010009023 | 0.975146153 | 0.332876233 |
| ENSGALG00010009024 | 0.939789413 | 0.322334208 |
| ENSGALG00010009025 | 0.79614117  | 0.255274074 |
| ENSGALG00010009026 | 0.932704201 | 0.318961842 |
| ENSGALG00010009027 | 0.411944811 | 0.37913248  |
| ENSGALG00010009028 | 0.925546383 | 0.308752592 |
| ENSGALG00010009029 | 0.915081728 | 0.450558875 |
| ENSGALG00010009030 | 0.95759564  | 0.227553543 |
| ENSGALG00010009031 | 0.064235564 | 0.117198385 |
| ENSGALG00010009034 | 0.975038043 | 0.306443296 |
| ENSGALG00010009035 | 0.906879828 | 0.212988447 |
| ENSGALG00010009036 | 0.917046085 | 0.422100016 |
| ENSGALG00010009037 | 0.910905121 | 0.224987129 |
| ENSGALG00010009038 | 0.889884659 | 0.350941074 |
| ENSGALG00010009039 | 0.664558848 | 0.034026512 |
| ENSGALG00010009040 | 0.943666876 | 0.279157443 |
| ENSGALG00010009043 | 0.501538117 | 0.354228538 |
| ENSGALG00010009045 | 0.529449658 | 0.252168504 |
| ENSGALG00010009047 | 0.974297623 | 0.250239488 |
| ENSGALG00010009049 | 0.68555979  | 0.266527462 |
| ENSGALG00010009050 | 0.89886885  | 0.401999661 |
| ENSGALG00010009051 | 0.531310299 | 0.082984895 |
| ENSGALG00010009052 | 0.4703555   | 0.141400331 |
| ENSGALG00010009053 | 0.266349267 | 0.252922358 |
| ENSGALG00010009054 | 0.197837976 | 0.043386327 |
| ENSGALG00010009056 | 0.111723115 | 0.155918956 |
| ENSGALG00010009057 | 0.681859389 | 0.241438104 |
| ENSGALG00010009059 | 0.898054066 | 0.373529387 |
| ENSGALG00010009062 | 0.060762054 | 0.1387881   |
| ENSGALG00010009063 | 0.844937446 | 0.027751253 |
| ENSGALG00010009064 | 0.467670801 | 0.421953779 |
| ENSGALG00010009065 | 0.976775537 | 0.293488498 |
| ENSGALG00010009067 | 0.220662747 | 0.12282644  |
| ENSGALG00010009068 | 0.969911747 | 0.356837062 |
| ENSGALG00010009069 | 0.442331328 | 0.132428836 |
| ENSGALG00010009073 | 0.862594433 | 0.069035557 |
| ENSGALG00010009076 | 0.55523752  | 0.160971579 |
| ENSGALG00010009078 | 0.532141184 | 0.242674197 |
| ENSGALG00010009079 | 0.843061852 | 0.216187101 |
| ENSGALG00010009080 | 0.835472331 | 0.371949262 |
| ENSGALG00010009081 | 0.914756464 | 0.417714099 |
| ENSGALG00010009083 | 0.963670507 | 0.314161714 |
| ENSGALG00010009085 | 0.905506302 | 0.345526877 |
| ENSGALG00010009086 | 0.979644086 | 0.284620049 |
| ENSGALG00010009088 | 0.257551669 | 0.202839218 |
| ENSGALG00010009089 | 0.623004254 | 0.279830405 |
| ENSGALG00010009091 | 0.99037278  | 0.340714766 |
| ENSGALG00010009092 | 0.693808657 | 0.302135973 |
| ENSGALG00010009093 | 0.453879638 | 0.565438343 |
| ENSGALG00010009094 | 0.983221    | 0.290175282 |
| ENSGALG00010009096 | 0.782429726 | 0.01831362  |
| ENSGALG00010009097 | 0.940072769 | 0.360019852 |
| ENSGALG00010009098 | 0.083152552 | 0.067899087 |
| ENSGALG00010009099 | 0.109021482 | 0.004454984 |
| ENSGALG00010009100 | 0.894171846 | 0.545348722 |

|                    |             |             |
|--------------------|-------------|-------------|
| ENSGALG00010009101 | 0.964876725 | 0.272956989 |
| ENSGALG00010009102 | 0.84008617  | 0.431321768 |
| ENSGALG00010009103 | 0.978858846 | 0.296462955 |
| ENSGALG00010009104 | 0.9518256   | 0.340949326 |
| ENSGALG00010009106 | 0.823792062 | 0.306600154 |
| ENSGALG00010009109 | 0.331330803 | 0.249368958 |
| ENSGALG00010009111 | 0.96456896  | 0.269097365 |
| ENSGALG00010009112 | 0.992428646 | 0.35992109  |
| ENSGALG00010009113 | 0.93165262  | 0.363513446 |
| ENSGALG00010009114 | 0.970280423 | 0.311636373 |
| ENSGALG00010009115 | 0.808630181 | 0.444899957 |
| ENSGALG00010009116 | 0.939810328 | 0.402997441 |
| ENSGALG00010009117 | 0.011388611 | 0.033513389 |
| ENSGALG00010009118 | 0.985287302 | 0.318558799 |
| ENSGALG00010009119 | 0.622373385 | 0.171707503 |
| ENSGALG00010009120 | 0.946575071 | 0.241606145 |
| ENSGALG00010009121 | 0.876425751 | 0.194805129 |
| ENSGALG00010009123 | 0.950115389 | 0.322144986 |
| ENSGALG00010009125 | 0.824996639 | 0.30121298  |
| ENSGALG00010009126 | 0.981872172 | 0.338311151 |
| ENSGALG00010009127 | 0.954136773 | 0.278580471 |
| ENSGALG00010009129 | 0.984653819 | 0.378832714 |
| ENSGALG00010009130 | 0.925466613 | 0.292337979 |
| ENSGALG00010009131 | 0.861045423 | 0.160236298 |
| ENSGALG00010009132 | 0.121011013 | 0.208763575 |
| ENSGALG00010009133 | 0.820244759 | 0.145828    |
| ENSGALG00010009135 | 0.68244371  | 0.367118157 |
| ENSGALG00010009136 | 0.990254014 | 0.265510666 |
| ENSGALG00010009137 | 0.961150753 | 0.354075354 |
| ENSGALG00010009138 | 0.074622415 | 0.36021485  |
| ENSGALG00010009139 | 0.249199688 | 0.207482223 |
| ENSGALG00010009140 | 0.111131027 | 0.058732907 |
| ENSGALG00010009141 | 0.951053537 | 0.315687889 |
| ENSGALG00010009142 | 0.990663262 | 0.315580469 |
| ENSGALG00010009143 | 0.500877653 | 0.023234526 |
| ENSGALG00010009144 | 0.719174818 | 0.097008602 |
| ENSGALG00010009145 | 0.386114539 | 0.074004299 |
| ENSGALG00010009146 | 0.322633957 | 0.000124062 |
| ENSGALG00010009147 | 0.984447271 | 0.353935568 |
| ENSGALG00010009148 | 0.96943116  | 0.339120748 |
| ENSGALG00010009149 | 0.877478808 | 0.107646593 |
| ENSGALG00010009150 | 0.742864746 | 0.152871774 |
| ENSGALG00010009151 | 0.180340613 | 0.076336052 |
| ENSGALG00010009152 | 0.913105026 | 0.255890084 |
| ENSGALG00010009153 | 0.876139769 | 0.292138235 |
| ENSGALG00010009155 | 0.927164216 | 0.281907439 |
| ENSGALG00010009157 | 0.462730488 | 0.128835678 |
| ENSGALG00010009158 | 0.320729011 | 0.144028995 |
| ENSGALG00010009159 | 0.270148847 | 0.180937283 |
| ENSGALG00010009160 | 0.399453135 | 0.144666429 |
| ENSGALG00010009162 | 0.290122505 | 0.464993379 |
| ENSGALG00010009163 | 0.243454145 | 0.103758247 |
| ENSGALG00010009164 | 0.347257554 | 0.217050453 |
| ENSGALG00010009165 | 0.2935711   | 0.261798438 |
| ENSGALG00010009166 | 0.878966288 | 0.2828647   |
| ENSGALG00010009167 | 0.977424729 | 0.405188534 |

|                    |             |             |
|--------------------|-------------|-------------|
| ENSGALG00010009168 | 0.932627227 | 0.35306971  |
| ENSGALG00010009170 | 0.874613092 | 0.287828316 |
| ENSGALG00010009171 | 0.064856166 | 0.171303517 |
| ENSGALG00010009172 | 0.352715211 | 0.300980491 |
| ENSGALG00010009173 | 0.584255144 | 0.124661154 |
| ENSGALG00010009176 | 0.464198464 | 0.340291937 |
| ENSGALG00010009180 | 0.963715185 | 0.312456496 |
| ENSGALG00010009181 | 0.967969233 | 0.319114656 |
| ENSGALG00010009183 | 0.469255613 | 0.111606247 |
| ENSGALG00010009185 | 0.621674414 | 0.239352559 |
| ENSGALG00010009186 | 0.431191163 | 0.106214945 |
| ENSGALG00010009187 | 0.750453997 | 0.33968897  |
| ENSGALG00010009188 | 0.622715334 | 0.291995876 |
| ENSGALG00010009189 | 0.147903574 | 0.263058826 |
| ENSGALG00010009190 | 0.821679594 | 0.447164632 |
| ENSGALG00010009191 | 0.940808098 | 0.304632891 |
| ENSGALG00010009192 | 0.816177408 | 0.265160119 |
| ENSGALG00010009193 | 0.924379172 | 0.221043504 |
| ENSGALG00010009194 | 0.883204148 | 0.425437341 |
| ENSGALG00010009195 | 0.461499486 | 0.127107551 |
| ENSGALG00010009196 | 0.390466756 | 0.106163828 |
| ENSGALG00010009197 | 0.511829601 | 0.308466888 |
| ENSGALG00010009198 | 0.67506301  | 0.380338521 |
| ENSGALG00010009199 | 0.979439905 | 0.289819726 |
| ENSGALG00010009200 | 0.809383461 | 0.204091307 |
| ENSGALG00010009202 | 0.908526098 | 0.250210769 |
| ENSGALG00010009204 | 0.551107417 | 0.277663202 |
| ENSGALG00010009205 | 0.955908767 | 0.30026816  |
| ENSGALG00010009206 | 0.265558089 | 0.028821141 |
| ENSGALG00010009208 | 0.942578908 | 0.278909918 |
| ENSGALG00010009210 | 0.283107207 | 0.256622444 |
| ENSGALG00010009212 | 0.690742056 | 0.314145115 |
| ENSGALG00010009213 | 0.924664807 | 0.375621987 |
| ENSGALG00010009214 | 0.204270534 | 0.015385154 |
| ENSGALG00010009216 | 0.949363234 | 0.287223072 |
| ENSGALG00010009219 | 0.988102595 | 0.277677712 |
| ENSGALG00010009220 | 0.552451851 | 0.247339038 |
| ENSGALG00010009222 | 0.081102735 | 0.195874932 |
| ENSGALG00010009223 | 0.984439957 | 0.282083306 |
| ENSGALG00010009224 | 0.993449492 | 0.332112893 |
| ENSGALG00010009225 | 0.88394196  | 0.135324968 |
| ENSGALG00010009227 | 0.940768395 | 0.297679463 |
| ENSGALG00010009228 | 0.836791816 | 0.435336129 |
| ENSGALG00010009231 | 0.633043105 | 0.359376128 |
| ENSGALG00010009232 | 0.928772901 | 0.323568315 |
| ENSGALG00010009233 | 0.288602645 | 0.101844431 |
| ENSGALG00010009234 | 0.481079393 | 0.212237748 |
| ENSGALG00010009235 | 0.969345385 | 0.356978111 |
| ENSGALG00010009236 | 0.233238615 | 0.176685012 |
| ENSGALG00010009237 | 0.625610224 | 0.091709738 |
| ENSGALG00010009238 | 0.502802413 | 0.125331407 |
| ENSGALG00010009239 | 0.933668652 | 0.194712459 |
| ENSGALG00010009240 | 0.918552142 | 0.295346134 |
| ENSGALG00010009241 | 0.723499267 | 0.248073173 |
| ENSGALG00010009243 | 0.50442438  | 0.243842813 |
| ENSGALG00010009245 | 0.315224891 | 0.366601178 |



|                    |             |             |
|--------------------|-------------|-------------|
| ENSGALG00010009246 | 0.967909224 | 0.304550194 |
| ENSGALG00010009250 | 0.987342577 | 0.264556317 |
| ENSGALG00010009252 | 0.59091888  | 0.147702636 |
| ENSGALG00010009253 | 0.941050253 | 0.323081185 |
| ENSGALG00010009254 | 0.599971609 | 0.26845767  |
| ENSGALG00010009256 | 0.930477187 | 0.392007724 |
| ENSGALG00010009257 | 0.973905107 | 0.335201618 |
| ENSGALG00010009258 | 0.890605537 | 0.336197079 |
| ENSGALG00010009259 | 0.650931426 | 0.276111283 |
| ENSGALG00010009262 | 0.285272007 | 0.109169955 |
| ENSGALG00010009263 | 0.984681791 | 0.310434326 |
| ENSGALG00010009265 | 0.366667574 | 0.096374266 |
| ENSGALG00010009266 | 0.786586086 | 0.328716985 |
| ENSGALG00010009268 | 0.116008223 | 0.00077567  |
| ENSGALG00010009270 | 0.391005801 | 0.038905436 |
| ENSGALG00010009273 | 0.936752182 | 0.191796319 |
| ENSGALG00010009275 | 0.652931963 | 0.201046922 |
| ENSGALG00010009276 | 0.738791106 | 0.066803798 |
| ENSGALG00010009277 | 0.883438233 | 0.205720054 |
| ENSGALG00010009279 | 0.952877733 | 0.293984288 |
| ENSGALG00010009280 | 0.969056423 | 0.326423002 |
| ENSGALG00010009282 | 0.294127039 | 0.406617819 |
| ENSGALG00010009283 | 0.000246074 | 0.091301674 |
| ENSGALG00010009284 | 0.475833564 | 0.301277194 |
| ENSGALG00010009285 | 0.589294659 | 0.040472659 |
| ENSGALG00010009286 | 0.756606091 | 0.094409416 |
| ENSGALG00010009287 | 0.034835075 | 0.173750304 |
| ENSGALG00010009289 | 0.938875239 | 0.278413877 |
| ENSGALG00010009291 | 0.266137114 | 0.107784983 |
| ENSGALG00010009294 | 0.926007283 | 0.189326373 |
| ENSGALG00010009297 | 0.976409118 | 0.33700196  |
| ENSGALG00010009299 | 0.965345724 | 0.276909738 |
| ENSGALG00010009303 | 0.960740608 | 0.272158944 |
| ENSGALG00010009306 | 0.501565408 | 0.19157095  |
| ENSGALG00010009307 | 0.838636063 | 0.174808097 |
| ENSGALG00010009309 | 0.988426001 | 0.333080229 |
| ENSGALG00010009311 | 0.457913492 | 0.463751825 |
| ENSGALG00010009313 | 0.95479691  | 0.368548525 |
| ENSGALG00010009315 | 0.498423932 | 0.168195647 |
| ENSGALG00010009317 | 0.335344854 | 0.151757791 |
| ENSGALG00010009320 | 0.348840432 | 0.204270277 |
| ENSGALG00010009322 | 0.603037122 | 0.148478032 |
| ENSGALG00010009323 | 0.974764427 | 0.312652535 |
| ENSGALG00010009326 | 0.502206088 | 0.049577608 |
| ENSGALG00010009327 | 0.366499402 | 0.304655994 |
| ENSGALG00010009328 | 0.931508992 | 0.526057802 |
| ENSGALG00010009329 | 0.370493859 | 0.13155368  |
| ENSGALG00010009330 | 0.905691252 | 0.342406946 |
| ENSGALG00010009332 | 0.512287777 | 0.323108314 |
| ENSGALG00010009333 | 0.981021055 | 0.297915877 |
| ENSGALG00010009334 | 0.975587451 | 0.32325165  |
| ENSGALG00010009335 | 0.978498108 | 0.312735504 |
| ENSGALG00010009336 | 0.948826582 | 0.448275905 |
| ENSGALG00010009337 | 0.964602535 | 0.314636072 |
| ENSGALG00010009338 | 0.980447156 | 0.394301107 |
| ENSGALG00010009340 | 0.946679435 | 0.339048444 |

|                    |             |             |
|--------------------|-------------|-------------|
| ENSGALG00010009343 | 0.058496737 | 0.160404795 |
| ENSGALG00010009344 | 0.97286695  | 0.305544833 |
| ENSGALG00010009345 | 0.192629209 | 0.268587133 |
| ENSGALG00010009346 | 0.043134879 | 0.186784523 |
| ENSGALG00010009347 | 0.988097936 | 0.326529337 |
| ENSGALG00010009348 | 0.335055705 | 0.169278136 |
| ENSGALG00010009349 | 0.954532933 | 0.346031051 |
| ENSGALG00010009351 | 0.964948396 | 0.361960929 |
| ENSGALG00010009352 | 0.947587485 | 0.244733778 |
| ENSGALG00010009353 | 0.496202257 | 0.280253662 |
| ENSGALG00010009354 | 0.226822397 | 0.05108955  |
| ENSGALG00010009355 | 0.968583472 | 0.340225635 |
| ENSGALG00010009357 | 0.961271066 | 0.226803844 |
| ENSGALG00010009358 | 0.579641124 | 0.008298689 |
| ENSGALG00010009359 | 0.977778112 | 0.344144641 |
| ENSGALG00010009360 | 0.957480469 | 0.276748816 |
| ENSGALG00010009361 | 0.01309043  | 0.509354819 |
| ENSGALG00010009362 | 0.646613546 | 0.36113991  |
| ENSGALG00010009363 | 0.347822576 | 0.222215904 |
| ENSGALG00010009364 | 0.955650336 | 0.312549598 |
| ENSGALG00010009365 | 0.981443672 | 0.291578103 |
| ENSGALG00010009366 | 0.011589493 | 0.110944875 |
| ENSGALG00010009367 | 0.833896727 | 0.313310841 |
| ENSGALG00010009368 | 0.064024696 | 0.301669988 |
| ENSGALG00010009369 | 0.052350997 | 0.305310891 |
| ENSGALG00010009370 | 0.923780307 | 0.132538641 |
| ENSGALG00010009371 | 0.961629554 | 0.269501968 |
| ENSGALG00010009372 | 0.429966208 | 0.113367164 |
| ENSGALG00010009373 | 0.95355176  | 0.212217504 |
| ENSGALG00010009374 | 0.965040998 | 0.263874513 |
| ENSGALG00010009375 | 0.236751829 | 0.036511106 |
| ENSGALG00010009376 | 0.98467956  | 0.271440355 |
| ENSGALG00010009377 | 0.203991683 | 0.058221925 |
| ENSGALG00010009378 | 0.917278977 | 0.376395611 |
| ENSGALG00010009379 | 0.997348216 | 0.329345462 |
| ENSGALG00010009381 | 0.747523189 | 0.068480703 |
| ENSGALG00010009382 | 0.348645811 | 0.106405353 |
| ENSGALG00010009383 | 0.929993827 | 0.328891435 |
| ENSGALG00010009384 | 0.833502142 | 0.096104326 |
| ENSGALG00010009385 | 0.997556421 | 0.334252269 |
| ENSGALG00010009386 | 0.14300637  | 0.036015413 |
| ENSGALG00010009387 | 0.986823971 | 0.323408404 |
| ENSGALG00010009388 | 0.978023265 | 0.314943503 |
| ENSGALG00010009389 | 0.410791808 | 0.080663222 |
| ENSGALG00010009390 | 0.732263091 | 0.224098365 |
| ENSGALG00010009391 | 0.828192776 | 0.239506573 |
| ENSGALG00010009392 | 0.98987624  | 0.292974104 |
| ENSGALG00010009393 | 0.975288485 | 0.289932762 |
| ENSGALG00010009394 | 0.221823731 | 0.062618599 |
| ENSGALG00010009395 | 0.151025479 | 0.370594939 |
| ENSGALG00010009396 | 0.868618933 | 0.373956457 |
| ENSGALG00010009397 | 0.555229777 | 0.416065782 |
| ENSGALG00010009398 | 0.76300181  | 0.057648165 |
| ENSGALG00010009399 | 0.223262192 | 0.216458078 |
| ENSGALG00010009400 | 0.79757726  | 0.269385928 |
| ENSGALG00010009401 | 0.143484564 | 0.153820707 |

|                    |             |             |
|--------------------|-------------|-------------|
| ENSGALG00010009403 | 0.294661357 | 0.109904448 |
| ENSGALG00010009404 | 0.721888753 | 0.255998586 |
| ENSGALG00010009407 | 0.955787645 | 0.240139833 |
| ENSGALG00010009408 | 0.889652662 | 0.327018886 |
| ENSGALG00010009409 | 0.34081212  | 0.34730063  |
| ENSGALG00010009410 | 0.916874008 | 0.369021529 |
| ENSGALG00010009411 | 0.944993721 | 0.365207044 |
| ENSGALG00010009412 | 0.061759815 | 0.125212148 |
| ENSGALG00010009414 | 0.471461019 | 0.20171668  |
| ENSGALG00010009415 | 0.43991956  | 0.219830184 |
| ENSGALG00010009416 | 0.851820072 | 0.021260842 |
| ENSGALG00010009420 | 0.414379968 | 0.375196934 |
| ENSGALG00010009425 | 0.45479502  | 0.427734319 |
| ENSGALG00010009430 | 0.817821068 | 0.284921971 |
| ENSGALG00010009431 | 0.975147618 | 0.333105203 |
| ENSGALG00010009432 | 0.9025601   | 0.36213337  |
| ENSGALG00010009433 | 0.502070782 | 0.231271286 |
| ENSGALG00010009435 | 0.016162984 | 0.384203003 |
| ENSGALG00010009437 | 0.901758299 | 0.40237393  |
| ENSGALG00010009439 | 0.926368918 | 0.325591777 |
| ENSGALG00010009440 | 0.027075211 | 0.143607493 |
| ENSGALG00010009441 | 0.915012447 | 0.460468752 |
| ENSGALG00010009444 | 0.560759228 | 0.375273652 |
| ENSGALG00010009446 | 0.977621395 | 0.363006112 |
| ENSGALG00010009447 | 0.428779355 | 0.024051302 |
| ENSGALG00010009451 | 0.961492304 | 0.401870463 |
| ENSGALG00010009452 | 0.94530732  | 0.285301616 |
| ENSGALG00010009453 | 0.83970025  | 0.316616496 |
| ENSGALG00010009457 | 0.588873966 | 0.109876895 |
| ENSGALG00010009458 | 0.524817041 | 0.078034272 |
| ENSGALG00010009461 | 0.215549513 | 0.01339     |
| ENSGALG00010009462 | 0.977767264 | 0.29883253  |
| ENSGALG00010009463 | 0.909229836 | 0.280382003 |
| ENSGALG00010009464 | 0.960639337 | 0.406882263 |
| ENSGALG00010009465 | 0.315049808 | 0.216957599 |
| ENSGALG00010009466 | 0.703089043 | 0.386298991 |
| ENSGALG00010009467 | 0.851793542 | 0.378202687 |
| ENSGALG00010009468 | 0.770064431 | 0.290023954 |
| ENSGALG00010009469 | 0.985671194 | 0.321358723 |
| ENSGALG00010009470 | 0.274542993 | 0.332601871 |
| ENSGALG00010009471 | 0.748800997 | 0.683286473 |
| ENSGALG00010009472 | 0.96779857  | 0.282503036 |
| ENSGALG00010009474 | 0.601424526 | 0.078414603 |
| ENSGALG00010009477 | 0.366027373 | 0.203034917 |
| ENSGALG00010009479 | 0.842525175 | 0.231298957 |
| ENSGALG00010009482 | 0.709250917 | 0.254844038 |
| ENSGALG00010009484 | 0.401925722 | 0.281494051 |
| ENSGALG00010009486 | 0.98770343  | 0.339835369 |
| ENSGALG00010009489 | 0.819325845 | 0.399093297 |
| ENSGALG00010009490 | 0.976752552 | 0.210410214 |
| ENSGALG00010009491 | 0.80225921  | 0.216904046 |
| ENSGALG00010009492 | 0.939018123 | 0.219497618 |
| ENSGALG00010009493 | 0.890494181 | 0.205397652 |
| ENSGALG00010009494 | 0.643673225 | 0.416982099 |
| ENSGALG00010009497 | 0.516495709 | 0.011547102 |
| ENSGALG00010009498 | 0.789230541 | 0.05527468  |

|                    |             |             |
|--------------------|-------------|-------------|
| ENSGALG00010009499 | 0.036506864 | 0.150507451 |
| ENSGALG00010009500 | 0.42431614  | 0.006155289 |
| ENSGALG00010009501 | 0.908855063 | 0.266715463 |
| ENSGALG00010009502 | 0.961824761 | 0.311446225 |
| ENSGALG00010009503 | 0.926150899 | 0.197492332 |
| ENSGALG00010009506 | 0.337143935 | 0.420377906 |
| ENSGALG00010009507 | 0.156611519 | 0.264062351 |
| ENSGALG00010009508 | 0.855954248 | 0.38256078  |
| ENSGALG00010009509 | 0.097291621 | 0.364606668 |
| ENSGALG00010009511 | 0.97357764  | 0.365332471 |
| ENSGALG00010009514 | 0.942429676 | 0.193145684 |
| ENSGALG00010009515 | 0.864021965 | 0.188713304 |
| ENSGALG00010009516 | 0.095653271 | 0.072578384 |
| ENSGALG00010009517 | 0.824988897 | 0.483362515 |
| ENSGALG00010009518 | 0.92466331  | 0.210118272 |
| ENSGALG00010009520 | 0.975276483 | 0.269666801 |
| ENSGALG00010009522 | 0.942677174 | 0.311692928 |
| ENSGALG00010009524 | 0.920847991 | 0.300687004 |
| ENSGALG00010009525 | 0.968142895 | 0.191319949 |
| ENSGALG00010009526 | 0.608837082 | 0.055839094 |
| ENSGALG00010009527 | 0.977107223 | 0.202925595 |
| ENSGALG00010009530 | 0.329860191 | 0.061550364 |
| ENSGALG00010009531 | 0.664476018 | 0.387177837 |
| ENSGALG00010009533 | 0.265558089 | 0.028821141 |
| ENSGALG00010009534 | 0.813313413 | 0.224089747 |
| ENSGALG00010009535 | 0.462035818 | 0.100622993 |
| ENSGALG00010009537 | 0.386086572 | 0.495102699 |
| ENSGALG00010009538 | 0.839824718 | 0.222069209 |
| ENSGALG00010009540 | 0.992620029 | 0.299946617 |
| ENSGALG00010009541 | 0.097927457 | 0.3097471   |
| ENSGALG00010009542 | 0.588178733 | 0.102538619 |
| ENSGALG00010009543 | 0.992748982 | 0.327172093 |
| ENSGALG00010009546 | 0.250534534 | 0.233169304 |
| ENSGALG00010009548 | 0.864038151 | 0.259937966 |
| ENSGALG00010009551 | 0.807607032 | 0.27527286  |
| ENSGALG00010009554 | 0.281141827 | 0.142705631 |
| ENSGALG00010009555 | 0.927352837 | 0.416091197 |
| ENSGALG00010009557 | 0.969136466 | 0.303369289 |
| ENSGALG00010009558 | 0.73121741  | 0.303941832 |
| ENSGALG00010009559 | 0.006836752 | 0.210729843 |
| ENSGALG00010009560 | 0.486128815 | 0.38436723  |
| ENSGALG00010009562 | 0.921107239 | 0.284151895 |
| ENSGALG00010009565 | 0.89368959  | 0.476678314 |
| ENSGALG00010009566 | 0.282151895 | 0.179552023 |
| ENSGALG00010009567 | 0.317168503 | 0.672001423 |
| ENSGALG00010009569 | 0.855551684 | 0.153648181 |
| ENSGALG00010009570 | 0.979950277 | 0.285793666 |
| ENSGALG00010009571 | 0.985483577 | 0.365352761 |
| ENSGALG00010009573 | 0.956343808 | 0.297851799 |
| ENSGALG00010009574 | 0.490756073 | 0.15354372  |
| ENSGALG00010009575 | 0.975128184 | 0.316163878 |
| ENSGALG00010009576 | 0.940140454 | 0.320303575 |
| ENSGALG00010009577 | 0.011589493 | 0.110944875 |
| ENSGALG00010009578 | 0.451890746 | 0.298515228 |
| ENSGALG00010009579 | 0.641792502 | 0.099534966 |
| ENSGALG00010009580 | 0.440508737 | 0.322120722 |

|                    |             |             |
|--------------------|-------------|-------------|
| ENSGALG00010009581 | 0.662036174 | 0.260784922 |
| ENSGALG00010009582 | 0.440263521 | 0.028350116 |
| ENSGALG00010009583 | 0.155752593 | 0.296074878 |
| ENSGALG00010009587 | 0.912330454 | 0.152983271 |
| ENSGALG00010009588 | 0.606085042 | 0.09331025  |
| ENSGALG00010009589 | 0.947527893 | 0.413817134 |
| ENSGALG00010009591 | 0.160205246 | 0.528740221 |
| ENSGALG00010009592 | 0.558135531 | 0.064790871 |
| ENSGALG00010009593 | 0.737900796 | 0.312022488 |
| ENSGALG00010009594 | 0.22385336  | 0.228458282 |
| ENSGALG00010009595 | 0.989018571 | 0.316786148 |
| ENSGALG00010009596 | 0.745006126 | 0.265874097 |
| ENSGALG00010009597 | 0.683617121 | 0.188583908 |
| ENSGALG00010009599 | 0.203991683 | 0.058221925 |
| ENSGALG00010009600 | 0.874935606 | 0.40374331  |
| ENSGALG00010009601 | 0.597897514 | 0.343050332 |
| ENSGALG00010009602 | 0.856120821 | 0.402773784 |
| ENSGALG00010009603 | 0.987659787 | 0.353262211 |
| ENSGALG00010009604 | 0.377008934 | 0.178767925 |
| ENSGALG00010009605 | 0.863653139 | 0.526477573 |
| ENSGALG00010009606 | 0.307575601 | 0.433875535 |
| ENSGALG00010009608 | 0.409904383 | 0.224854342 |
| ENSGALG00010009609 | 0.962140108 | 0.329167312 |
| ENSGALG00010009612 | 0.972034569 | 0.313651745 |
| ENSGALG00010009615 | 0.867696112 | 0.440618142 |
| ENSGALG00010009616 | 0.358653964 | 0.083018769 |
| ENSGALG00010009617 | 0.449411521 | 0.254524285 |
| ENSGALG00010009618 | 0.095103607 | 0.010456941 |
| ENSGALG00010009619 | 0.986690161 | 0.33598594  |
| ENSGALG00010009620 | 0.970933976 | 0.358962906 |
| ENSGALG00010009621 | 0.49020544  | 0.213524861 |
| ENSGALG00010009623 | 0.388812529 | 0.236752812 |
| ENSGALG00010009624 | 0.277566769 | 0.107857127 |
| ENSGALG00010009625 | 0.571176978 | 0.16837699  |
| ENSGALG00010009627 | 0.233163402 | 0.119740103 |
| ENSGALG00010009629 | 0.92676478  | 0.342054006 |
| ENSGALG00010009631 | 0.264239718 | 0.073427965 |
| ENSGALG00010009634 | 0.863737372 | 0.316858944 |
| ENSGALG00010009635 | 0.964609497 | 0.278599368 |
| ENSGALG00010009637 | 0.640446143 | 0.018760199 |
| ENSGALG00010009638 | 0.497406396 | 0.242271483 |
| ENSGALG00010009640 | 0.95190811  | 0.31257053  |
| ENSGALG00010009643 | 0.986641309 | 0.33829349  |
| ENSGALG00010009644 | 0.482632386 | 0.22150328  |
| ENSGALG00010009645 | 0.468179601 | 0.20442508  |
| ENSGALG00010009646 | 0.225011329 | 0.066660175 |
| ENSGALG00010009647 | 0.655064719 | 0.081205866 |
| ENSGALG00010009649 | 0.934405624 | 0.254374783 |
| ENSGALG00010009650 | 0.987947045 | 0.352239836 |
| ENSGALG00010009652 | 0.563438833 | 0.194682084 |
| ENSGALG00010009653 | 0.978629194 | 0.335553124 |
| ENSGALG00010009654 | 0.9734121   | 0.357437583 |
| ENSGALG00010009655 | 0.102173558 | 0.134877586 |
| ENSGALG00010009657 | 0.675228119 | 0.184303943 |
| ENSGALG00010009658 | 0.765858214 | 0.060355387 |
| ENSGALG00010009659 | 0.629241105 | 0.004876131 |

|                    |             |             |
|--------------------|-------------|-------------|
| ENSGALG00010009663 | 0.977809962 | 0.32807451  |
| ENSGALG00010009665 | 0.963638586 | 0.525499182 |
| ENSGALG00010009666 | 0.810271303 | 0.293482743 |
| ENSGALG00010009669 | 0.048954231 | 0.160736934 |
| ENSGALG00010009671 | 0.335553126 | 0.154693383 |
| ENSGALG00010009672 | 0.846377223 | 0.45918451  |
| ENSGALG00010009673 | 0.230116839 | 0.265243756 |
| ENSGALG00010009676 | 0.996300368 | 0.325584879 |
| ENSGALG00010009677 | 0.958075593 | 0.34300424  |
| ENSGALG00010009678 | 0.92072931  | 0.35154227  |
| ENSGALG00010009679 | 0.925877045 | 0.284256071 |
| ENSGALG00010009683 | 0.866395414 | 0.377464342 |
| ENSGALG00010009685 | 0.398190249 | 0.125967147 |
| ENSGALG00010009686 | 0.964114384 | 0.314866797 |
| ENSGALG00010009689 | 0.977111406 | 0.141948623 |
| ENSGALG00010009690 | 0.905292703 | 0.380295865 |
| ENSGALG00010009691 | 0.274489239 | 0.148680386 |
| ENSGALG00010009695 | 0.98039601  | 0.323624969 |
| ENSGALG00010009697 | 0.092968    | 0.000815592 |
| ENSGALG00010009699 | 0.476244897 | 0.234332884 |
| ENSGALG00010009700 | 0.964304484 | 0.19358275  |
| ENSGALG00010009702 | 0.711456327 | 0.419900663 |
| ENSGALG00010009703 | 0.677048397 | 0.003025202 |
| ENSGALG00010009704 | 0.773393201 | 0.030485318 |
| ENSGALG00010009705 | 0.765020317 | 0.114577576 |
| ENSGALG00010009707 | 0.285272007 | 0.109169955 |
| ENSGALG00010009708 | 0.278960356 | 0.202096482 |
| ENSGALG00010009710 | 0.479996964 | 0.324408793 |
| ENSGALG00010009712 | 0.99130254  | 0.335895774 |
| ENSGALG00010009715 | 0.030615595 | 0.191807048 |
| ENSGALG00010009717 | 0.885259381 | 0.433963748 |
| ENSGALG00010009718 | 0.364509854 | 0.168471296 |
| ENSGALG00010009719 | 0.842573772 | 0.271554948 |
| ENSGALG00010009720 | 0.979350338 | 0.329682958 |
| ENSGALG00010009721 | 0.9721776   | 0.355822864 |
| ENSGALG00010009722 | 0.605612245 | 0.182607879 |
| ENSGALG00010009724 | 0.584200353 | 0.255218888 |
| ENSGALG00010009725 | 0.126019257 | 0.032418075 |
| ENSGALG00010009726 | 0.511220422 | 0.048854876 |
| ENSGALG00010009727 | 0.94246361  | 0.407593405 |
| ENSGALG00010009728 | 0.588457653 | 0.184545201 |
| ENSGALG00010009730 | 0.356087325 | 0.159041782 |
| ENSGALG00010009731 | 0.905962154 | 0.393063213 |
| ENSGALG00010009732 | 0.729876145 | 0.26714909  |
| ENSGALG00010009736 | 0.265668698 | 0.09683288  |
| ENSGALG00010009738 | 0.484299427 | 0.282459952 |
| ENSGALG00010009740 | 0.25229655  | 0.15721546  |
| ENSGALG00010009741 | 0.880183615 | 0.295214871 |
| ENSGALG00010009743 | 0.9355053   | 0.260672818 |
| ENSGALG00010009744 | 0.759903103 | 0.323836285 |
| ENSGALG00010009746 | 0.384966644 | 0.120247113 |
| ENSGALG00010009749 | 0.950222904 | 0.239915819 |
| ENSGALG00010009750 | 0.3638061   | 0.160273458 |
| ENSGALG00010009751 | 0.162317265 | 0.409793822 |
| ENSGALG00010009752 | 0.885394118 | 0.269665063 |
| ENSGALG00010009753 | 0.984377799 | 0.326377063 |

|                    |             |             |
|--------------------|-------------|-------------|
| ENSGALG00010009754 | 0.759962375 | 0.044752084 |
| ENSGALG00010009755 | 0.499884119 | 0.186219421 |
| ENSGALG00010009756 | 0.366824439 | 0.481171868 |
| ENSGALG00010009759 | 0.484177998 | 0.010642839 |
| ENSGALG00010009760 | 0.511774065 | 0.058201506 |
| ENSGALG00010009761 | 0.908598863 | 0.2747089   |
| ENSGALG00010009762 | 0.978073768 | 0.336441397 |
| ENSGALG00010009763 | 0.658780791 | 0.262348004 |
| ENSGALG00010009765 | 0.903404977 | 0.412018859 |
| ENSGALG00010009766 | 0.373762061 | 0.177956487 |
| ENSGALG00010009769 | 0.826625408 | 0.290337067 |
| ENSGALG00010009772 | 0.292583563 | 0.339182213 |
| ENSGALG00010009773 | 0.189240572 | 0.04996112  |
| ENSGALG00010009774 | 0.918760457 | 0.156238238 |
| ENSGALG00010009775 | 0.146131158 | 0.328767982 |
| ENSGALG00010009776 | 0.815334565 | 0.389566982 |
| ENSGALG00010009777 | 0.970338357 | 0.379993849 |
| ENSGALG00010009778 | 0.840668347 | 0.313979659 |
| ENSGALG00010009779 | 0.778148658 | 0.069008811 |
| ENSGALG00010009780 | 0.656676942 | 0.362741865 |
| ENSGALG00010009783 | 0.442020646 | 0.772771322 |
| ENSGALG00010009784 | 0.450885553 | 0.213573826 |
| ENSGALG00010009785 | 0.685256275 | 0.143604398 |
| ENSGALG00010009786 | 0.63472222  | 0.371159432 |
| ENSGALG00010009787 | 0.560931708 | 0.223293307 |
| ENSGALG00010009788 | 0.975685356 | 0.338499425 |
| ENSGALG00010009789 | 0.391468422 | 0.257347124 |
| ENSGALG00010009791 | 0.531708629 | 0.243822988 |
| ENSGALG00010009793 | 0.889482788 | 0.418936054 |
| ENSGALG00010009795 | 0.943307525 | 0.411305036 |
| ENSGALG00010009796 | 0.548920747 | 0.157002707 |
| ENSGALG00010009797 | 0.030911843 | 0.059998647 |
| ENSGALG00010009798 | 0.599124168 | 0.055964695 |
| ENSGALG00010009801 | 0.067462641 | 0.227437614 |
| ENSGALG00010009802 | 0.378999746 | 0.377668043 |
| ENSGALG00010009803 | 0.035158038 | 0.119871525 |
| ENSGALG00010009804 | 0.818989881 | 0.23851854  |
| ENSGALG00010009805 | 0.743518269 | 0.245184294 |
| ENSGALG00010009806 | 0.895372594 | 0.413421495 |
| ENSGALG00010009807 | 0.471274576 | 0.056405625 |
| ENSGALG00010009809 | 0.974047175 | 0.349545621 |
| ENSGALG00010009810 | 0.372077039 | 0.061157367 |
| ENSGALG00010009811 | 0.955400806 | 0.305035436 |
| ENSGALG00010009813 | 0.015376535 | 0.08458412  |
| ENSGALG00010009815 | 0.914377006 | 0.404967173 |
| ENSGALG00010009819 | 0.490939355 | 0.689956703 |
| ENSGALG00010009822 | 0.47747502  | 0.249114104 |
| ENSGALG00010009829 | 0.303449328 | 0.076304882 |
| ENSGALG00010009830 | 0.963570738 | 0.342154873 |
| ENSGALG00010009831 | 0.868644744 | 0.337454957 |
| ENSGALG00010009833 | 0.767357131 | 0.323276072 |
| ENSGALG00010009834 | 0.789301261 | 0.348318938 |
| ENSGALG00010009839 | 0.91474749  | 0.300888923 |
| ENSGALG00010009840 | 0.093471257 | 0.169939488 |
| ENSGALG00010009841 | 0.682902721 | 0.296582717 |
| ENSGALG00010009842 | 0.973347387 | 0.380359263 |

|                    |             |             |
|--------------------|-------------|-------------|
| ENSGALG00010009843 | 0.012433676 | 0.134633327 |
| ENSGALG00010009844 | 0.070813117 | 0.240543186 |
| ENSGALG00010009847 | 0.057003729 | 0.153215582 |
| ENSGALG00010009848 | 0.109540589 | 0.06117983  |
| ENSGALG00010009849 | 0.103735514 | 0.176217522 |
| ENSGALG00010009850 | 0.873013659 | 0.332650298 |
| ENSGALG00010009851 | 0.987967066 | 0.328866037 |
| ENSGALG00010009852 | 0.708384984 | 0.55834405  |
| ENSGALG00010009854 | 0.99376886  | 0.345609755 |
| ENSGALG00010009857 | 0.649929258 | 0.486772894 |
| ENSGALG00010009858 | 0.986252222 | 0.268260451 |
| ENSGALG00010009864 | 0.188612019 | 0.394446161 |
| ENSGALG00010009865 | 0.324020854 | 0.340314887 |
| ENSGALG00010009866 | 0.973633792 | 0.302155469 |
| ENSGALG00010009868 | 0.936799344 | 0.402958992 |
| ENSGALG00010009869 | 0.421101213 | 0.283636776 |
| ENSGALG00010009870 | 0.873424389 | 0.238916902 |
| ENSGALG00010009871 | 0.104705059 | 0.204789516 |
| ENSGALG00010009872 | 0.336405255 | 0.013337989 |
| ENSGALG00010009873 | 0.9100757   | 0.418241258 |
| ENSGALG00010009874 | 0.937106355 | 0.37514417  |
| ENSGALG00010009876 | 0.985334786 | 0.317768199 |
| ENSGALG00010009877 | 0.785956934 | 0.038099166 |
| ENSGALG00010009878 | 0.491333139 | 0.214742062 |
| ENSGALG00010009880 | 0.044640162 | 0.167754086 |
| ENSGALG00010009881 | 0.64403313  | 0.243753009 |
| ENSGALG00010009882 | 0.265558089 | 0.028821141 |
| ENSGALG00010009883 | 0.061092695 | 0.039742892 |
| ENSGALG00010009884 | 0.031686609 | 0.300007471 |
| ENSGALG00010009888 | 0.215798964 | 0.284793648 |
| ENSGALG00010009902 | 0.950911785 | 0.260523702 |
| ENSGALG00010009905 | 0.49695585  | 0.240488329 |
| ENSGALG00010009910 | 0.445601919 | 0.178660484 |
| ENSGALG00010009914 | 0.692013264 | 0.406326878 |
| ENSGALG00010009915 | 0.515059117 | 0.519145618 |
| ENSGALG00010009922 | 0.4659562   | 0.134605374 |
| ENSGALG00010009931 | 0.270451009 | 0.090541667 |
| ENSGALG00010009932 | 0.305117634 | 0.208649402 |
| ENSGALG00010009938 | 0.730696177 | 0.267885515 |
| ENSGALG00010009940 | 0.390477114 | 0.143486823 |
| ENSGALG00010009941 | 0.81897072  | 0.420076106 |
| ENSGALG00010009943 | 0.913788886 | 0.35670485  |
| ENSGALG00010009948 | 0.969738013 | 0.381179466 |
| ENSGALG00010009954 | 0.111639917 | 0.19645113  |
| ENSGALG00010009957 | 0.264239718 | 0.073427965 |
| ENSGALG00010009959 | 0.399453749 | 0.144668892 |
| ENSGALG00010009961 | 0.345957381 | 0.377989906 |
| ENSGALG00010009962 | 0.531051992 | 0.08858496  |
| ENSGALG00010009967 | 0.083085855 | 0.05492063  |
| ENSGALG00010009970 | 0.422132218 | 0.074365263 |
| ENSGALG00010009971 | 0.927306009 | 0.141964572 |
| ENSGALG00010009972 | 0.974794931 | 0.293816426 |
| ENSGALG00010009975 | 0.475532602 | 0.130065709 |
| ENSGALG00010009978 | 0.747846086 | 0.245055183 |
| ENSGALG00010009979 | 0.338467499 | 0.109387283 |
| ENSGALG00010009982 | 0.467260259 | 0.10848689  |



|                    |             |             |
|--------------------|-------------|-------------|
| ENSGALG00010009985 | 0.967267476 | 0.292697704 |
| ENSGALG00010009989 | 0.395366848 | 0.202193964 |
| ENSGALG00010009990 | 0.029558715 | 0.175619474 |
| ENSGALG00010009991 | 0.102909754 | 0.079672438 |
| ENSGALG00010009992 | 0.635183038 | 0.020400828 |
| ENSGALG00010009993 | 0.468170667 | 0.207143226 |
| ENSGALG00010009995 | 0.431064742 | 0.102329685 |
| ENSGALG00010009998 | 0.760783024 | 0.238559423 |
| ENSGALG00010009999 | 0.059990911 | 0.036361224 |
| ENSGALG00010010000 | 0.10909606  | 0.093996928 |
| ENSGALG00010010001 | 0.441582771 | 0.194293404 |
| ENSGALG00010010002 | 0.400013143 | 0.107448404 |
| ENSGALG00010010003 | 0.503621832 | 0.147992139 |
| ENSGALG00010010005 | 0.648455666 | 0.252916926 |
| ENSGALG00010010006 | 0.922057907 | 0.204520005 |
| ENSGALG00010010007 | 0.96564965  | 0.334497676 |
| ENSGALG00010010008 | 0.397843669 | 0.221800636 |
| ENSGALG00010010009 | 0.718689834 | 0.289534957 |
| ENSGALG00010010011 | 0.659534851 | 0.085162371 |
| ENSGALG00010010012 | 0.140866473 | 0.113174349 |
| ENSGALG00010010014 | 0.498236548 | 0.235624701 |
| ENSGALG00010010017 | 0.74738394  | 0.372555998 |
| ENSGALG00010010019 | 0.988612995 | 0.302037487 |
| ENSGALG00010010021 | 0.573884494 | 0.200277229 |
| ENSGALG00010010022 | 0.928830336 | 0.364577207 |
| ENSGALG00010010025 | 0.956287568 | 0.119932951 |
| ENSGALG00010010030 | 0.321092151 | 0.305973755 |
| ENSGALG00010010032 | 0.328574586 | 0.266567811 |
| ENSGALG00010010035 | 0.839755983 | 0.330407041 |
| ENSGALG00010010037 | 0.899425395 | 0.27792012  |
| ENSGALG00010010038 | 0.810322271 | 0.264881561 |
| ENSGALG00010010039 | 0.333759773 | 0.519918642 |
| ENSGALG00010010040 | 0.208550923 | 0.676301294 |
| ENSGALG00010010042 | 0.204269594 | 0.113864108 |
| ENSGALG00010010044 | 0.265558089 | 0.028821141 |
| ENSGALG00010010046 | 0.155834133 | 0.213121363 |
| ENSGALG00010010047 | 0.530506168 | 0.364260746 |
| ENSGALG00010010049 | 0.121549302 | 0.471566601 |
| ENSGALG00010010051 | 0.207064507 | 0.058100135 |
| ENSGALG00010010052 | 0.942899116 | 0.343823095 |
| ENSGALG00010010053 | 0.934019782 | 0.30056276  |
| ENSGALG00010010054 | 0.220380257 | 0.287338482 |
| ENSGALG00010010056 | 0.848970522 | 0.178884709 |
| ENSGALG00010010057 | 0.899444045 | 0.287506077 |
| ENSGALG00010010058 | 0.271701261 | 0.072417625 |
| ENSGALG00010010059 | 0.741840525 | 0.137963246 |
| ENSGALG00010010060 | 0.031716562 | 0.057041277 |
| ENSGALG00010010061 | 0.973900372 | 0.322501076 |
| ENSGALG00010010062 | 0.188894633 | 0.116841825 |
| ENSGALG00010010063 | 0.176677727 | 0.092693733 |
| ENSGALG00010010064 | 0.801416667 | 0.175489273 |
| ENSGALG00010010066 | 0.389501229 | 0.174238696 |
| ENSGALG00010010068 | 0.132187787 | 0.179344    |
| ENSGALG00010010070 | 0.60025556  | 0.17665402  |
| ENSGALG00010010071 | 0.12066259  | 0.310632514 |
| ENSGALG00010010074 | 0.285272007 | 0.109169955 |

|                    |             |             |
|--------------------|-------------|-------------|
| ENSGALG00010010075 | 0.21893235  | 0.196486431 |
| ENSGALG00010010076 | 0.93825124  | 0.348238333 |
| ENSGALG00010010077 | 0.25875217  | 0.000638035 |
| ENSGALG00010010080 | 0.99371772  | 0.334242988 |
| ENSGALG00010010081 | 0.499268466 | 0.058931645 |
| ENSGALG00010010082 | 0.58781186  | 0.387549919 |
| ENSGALG00010010083 | 0.545063688 | 0.108129729 |
| ENSGALG00010010084 | 0.645945062 | 0.040118824 |
| ENSGALG00010010085 | 0.804441753 | 0.441967055 |
| ENSGALG00010010088 | 0.461628388 | 0.201893452 |
| ENSGALG00010010090 | 0.495600535 | 0.131676095 |
| ENSGALG00010010092 | 0.49474283  | 0.15909416  |
| ENSGALG00010010093 | 0.104691583 | 0.151088187 |
| ENSGALG00010010094 | 0.989491252 | 0.361107675 |
| ENSGALG00010010095 | 0.926637164 | 0.270032831 |
| ENSGALG00010010096 | 0.200570274 | 0.091667991 |
| ENSGALG00010010097 | 0.375287285 | 0.114121296 |
| ENSGALG00010010099 | 0.222831216 | 0.180412963 |
| ENSGALG00010010100 | 0.935892838 | 0.310811945 |
| ENSGALG00010010101 | 0.90396031  | 0.332103188 |
| ENSGALG00010010102 | 0.608853717 | 0.190098519 |
| ENSGALG00010010103 | 0.957003037 | 0.322747939 |
| ENSGALG00010010105 | 0.381314909 | 0.145557719 |
| ENSGALG00010010106 | 0.148668272 | 0.280013144 |
| ENSGALG00010010107 | 0.756290286 | 0.134690539 |
| ENSGALG00010010108 | 0.480703662 | 0.130562937 |
| ENSGALG00010010109 | 0.615837864 | 0.022509563 |
| ENSGALG00010010110 | 0.432179255 | 0.118617507 |
| ENSGALG00010010111 | 0.961152441 | 0.335195163 |
| ENSGALG00010010112 | 0.370492735 | 0.206325946 |
| ENSGALG00010010115 | 0.995915512 | 0.320157712 |
| ENSGALG00010010116 | 0.526578179 | 0.13496119  |
| ENSGALG00010010118 | 0.371261245 | 0.110780929 |
| ENSGALG00010010119 | 0.325549722 | 0.228789892 |
| ENSGALG00010010120 | 0.200045717 | 0.006774396 |
| ENSGALG00010010122 | 0.656458728 | 0.496052869 |
| ENSGALG00010010123 | 0.672273613 | 0.228352865 |
| ENSGALG00010010124 | 0.907341166 | 0.362526778 |
| ENSGALG00010010125 | 0.861589839 | 0.246409383 |
| ENSGALG00010010126 | 0.077603677 | 0.146292989 |
| ENSGALG00010010127 | 0.083349757 | 0.063704233 |
| ENSGALG00010010129 | 0.46465774  | 0.185432666 |
| ENSGALG00010010132 | 0.622439192 | 0.057527177 |
| ENSGALG00010010133 | 0.897174546 | 0.271199514 |
| ENSGALG00010010134 | 0.825005119 | 0.297910563 |
| ENSGALG00010010136 | 0.960013795 | 0.467689433 |
| ENSGALG00010010137 | 0.021520484 | 0.110470564 |
| ENSGALG00010010139 | 0.330068334 | 0.11208283  |
| ENSGALG00010010140 | 0.064991489 | 0.142576448 |
| ENSGALG00010010141 | 0.270451009 | 0.090541667 |
| ENSGALG00010010142 | 0.334801588 | 0.14615457  |
| ENSGALG00010010144 | 0.627485497 | 0.358635038 |
| ENSGALG00010010145 | 0.588780923 | 0.197935799 |
| ENSGALG00010010146 | 0.93390512  | 0.386131463 |
| ENSGALG00010010147 | 0.831948738 | 0.277404393 |
| ENSGALG00010010148 | 0.062616764 | 0.025989509 |

|                    |             |             |
|--------------------|-------------|-------------|
| ENSGALG00010010150 | 0.447267761 | 0.035535305 |
| ENSGALG00010010151 | 0.452822474 | 0.311204231 |
| ENSGALG00010010153 | 0.974746203 | 0.334838112 |
| ENSGALG00010010154 | 0.799215469 | 0.300358157 |
| ENSGALG00010010155 | 0.633139237 | 0.177684054 |
| ENSGALG00010010156 | 0.973289077 | 0.315277365 |
| ENSGALG00010010157 | 0.763392333 | 0.25398213  |
| ENSGALG00010010159 | 0.52420736  | 0.027891208 |
| ENSGALG00010010160 | 0.30027592  | 0.281739051 |
| ENSGALG00010010161 | 0.887836477 | 0.284871424 |
| ENSGALG00010010162 | 0.838336247 | 0.267889163 |
| ENSGALG00010010164 | 0.967976116 | 0.206156454 |
| ENSGALG00010010165 | 0.788048749 | 0.262322415 |
| ENSGALG00010010167 | 0.473958231 | 0.29145015  |
| ENSGALG00010010168 | 0.110714723 | 0.379244672 |
| ENSGALG00010010170 | 0.487356268 | 0.202687677 |
| ENSGALG00010010171 | 0.858141178 | 0.108929613 |
| ENSGALG00010010175 | 0.894276233 | 0.347141037 |
| ENSGALG00010010176 | 0.208550923 | 0.676301294 |
| ENSGALG00010010177 | 0.270542518 | 0.179823095 |
| ENSGALG00010010178 | 0.424854426 | 0.232233752 |
| ENSGALG00010010179 | 0.75970069  | 0.235982887 |
| ENSGALG00010010181 | 0.402628427 | 0.005149517 |
| ENSGALG00010010183 | 0.885620908 | 0.296768766 |
| ENSGALG00010010185 | 0.38335127  | 0.333419348 |
| ENSGALG00010010186 | 0.879351092 | 0.330034269 |
| ENSGALG00010010187 | 0.848655989 | 0.335509533 |
| ENSGALG00010010188 | 0.977310893 | 0.288769402 |
| ENSGALG00010010190 | 0.871753921 | 0.437906482 |
| ENSGALG00010010191 | 0.402611391 | 0.240573049 |
| ENSGALG00010010193 | 0.265558089 | 0.028821141 |
| ENSGALG00010010195 | 0.972080356 | 0.368662327 |
| ENSGALG00010010196 | 0.272381648 | 0.201609916 |
| ENSGALG00010010197 | 0.992186632 | 0.313825112 |
| ENSGALG00010010198 | 0.333298903 | 0.144818888 |
| ENSGALG00010010201 | 0.644426007 | 0.329039512 |
| ENSGALG00010010203 | 0.260711655 | 0.163637639 |
| ENSGALG00010010205 | 0.962593803 | 0.212056088 |
| ENSGALG00010010206 | 0.974143684 | 0.385205465 |
| ENSGALG00010010213 | 0.115171987 | 0.264511384 |
| ENSGALG00010010214 | 0.97800634  | 0.331408464 |
| ENSGALG00010010215 | 0.082195976 | 0.006415488 |
| ENSGALG00010010216 | 0.775520993 | 0.48478509  |
| ENSGALG00010010218 | 0.557209524 | 0.237419516 |
| ENSGALG00010010219 | 0.203991683 | 0.058221925 |
| ENSGALG00010010220 | 0.264239718 | 0.073427965 |
| ENSGALG00010010222 | 0.975649525 | 0.395992993 |
| ENSGALG00010010223 | 0.843198081 | 0.188208144 |
| ENSGALG00010010224 | 0.547650154 | 0.287696373 |
| ENSGALG00010010225 | 0.382141826 | 0.113944492 |
| ENSGALG00010010226 | 0.542647442 | 0.375289364 |
| ENSGALG00010010227 | 0.208550923 | 0.676301294 |
| ENSGALG00010010228 | 0.270192668 | 0.075397207 |
| ENSGALG00010010231 | 0.799132784 | 0.434186817 |
| ENSGALG00010010232 | 0.150267348 | 0.115512342 |
| ENSGALG00010010233 | 0.581496718 | 0.199799195 |

|                    |             |             |
|--------------------|-------------|-------------|
| ENSGALG00010010234 | 0.962678153 | 0.388906688 |
| ENSGALG00010010239 | 0.339444113 | 0.045741665 |
| ENSGALG00010010240 | 0.986252846 | 0.340166558 |
| ENSGALG00010010241 | 0.842767094 | 0.3009802   |
| ENSGALG00010010243 | 0.928880498 | 0.275649245 |
| ENSGALG00010010244 | 0.490568407 | 0.142044933 |
| ENSGALG00010010245 | 0.6070394   | 0.211842667 |
| ENSGALG00010010246 | 0.974402486 | 0.371428418 |
| ENSGALG00010010248 | 0.254896197 | 0.164745959 |
| ENSGALG00010010249 | 0.8957164   | 0.316869961 |
| ENSGALG00010010250 | 0.466282844 | 0.382935483 |
| ENSGALG00010010251 | 0.272036314 | 0.190020678 |
| ENSGALG00010010252 | 0.798300157 | 0.160941289 |
| ENSGALG00010010253 | 0.955606639 | 0.252266645 |
| ENSGALG00010010254 | 0.863810433 | 0.082835086 |
| ENSGALG00010010255 | 0.909957295 | 0.437195285 |
| ENSGALG00010010256 | 0.879438376 | 0.304536919 |
| ENSGALG00010010257 | 0.814253463 | 0.288294583 |
| ENSGALG00010010258 | 0.492471405 | 0.107463898 |
| ENSGALG00010010259 | 0.953060639 | 0.387708267 |
| ENSGALG00010010260 | 0.280792744 | 0.320044908 |
| ENSGALG00010010261 | 0.325694796 | 0.462134608 |
| ENSGALG00010010262 | 0.147302884 | 0.02861714  |
| ENSGALG00010010263 | 0.902999789 | 0.26420622  |
| ENSGALG00010010264 | 0.53209222  | 0.168828463 |
| ENSGALG00010010266 | 0.343056976 | 0.099874359 |
| ENSGALG00010010267 | 0.821416696 | 0.180775312 |
| ENSGALG00010010268 | 0.38050694  | 0.099805136 |
| ENSGALG00010010270 | 0.879038168 | 0.201211431 |
| ENSGALG00010010271 | 0.610079168 | 0.021953707 |
| ENSGALG00010010273 | 0.91420573  | 0.308801344 |
| ENSGALG00010010274 | 0.842028475 | 0.027453206 |
| ENSGALG00010010275 | 0.952683882 | 0.136993289 |
| ENSGALG00010010276 | 0.73497581  | 0.182319894 |
| ENSGALG00010010277 | 0.262922434 | 0.138601464 |
| ENSGALG00010010278 | 0.484350639 | 0.398650629 |
| ENSGALG00010010279 | 0.824599223 | 0.368033645 |
| ENSGALG00010010280 | 0.921518735 | 0.303572303 |
| ENSGALG00010010281 | 0.404167701 | 0.144831306 |
| ENSGALG00010010282 | 0.083956046 | 0.072666279 |
| ENSGALG00010010284 | 0.907567865 | 0.162851466 |
| ENSGALG00010010285 | 0.968993282 | 0.215155932 |
| ENSGALG00010010286 | 0.038961094 | 0.119686046 |
| ENSGALG00010010287 | 0.972499735 | 0.372863183 |
| ENSGALG00010010288 | 0.942963964 | 0.332108653 |
| ENSGALG00010010289 | 0.660770539 | 0.218201639 |
| ENSGALG00010010290 | 0.775061608 | 0.163967904 |
| ENSGALG00010010291 | 0.313994451 | 0.071454208 |
| ENSGALG00010010292 | 0.40785333  | 0.157127562 |
| ENSGALG00010010293 | 0.643284367 | 0.345514057 |
| ENSGALG00010010294 | 0.284144401 | 0.078500337 |
| ENSGALG00010010295 | 0.988225539 | 0.329586732 |
| ENSGALG00010010296 | 0.67851627  | 0.225729618 |
| ENSGALG00010010297 | 0.397165244 | 0.108993322 |
| ENSGALG00010010298 | 0.540668147 | 0.071592375 |
| ENSGALG00010010299 | 0.77482881  | 0.168606611 |

|                    |             |             |
|--------------------|-------------|-------------|
| ENSGALG00010010300 | 0.920336957 | 0.397912356 |
| ENSGALG00010010301 | 0.704841285 | 0.158761891 |
| ENSGALG00010010302 | 0.053435897 | 0.200042229 |
| ENSGALG00010010303 | 0.97573173  | 0.286732021 |
| ENSGALG00010010304 | 0.527403248 | 0.395275982 |
| ENSGALG00010010305 | 0.982661346 | 0.263564983 |
| ENSGALG00010010306 | 0.48382548  | 0.145996577 |
| ENSGALG00010010307 | 0.320729011 | 0.144028995 |
| ENSGALG00010010308 | 0.494377897 | 0.166144269 |
| ENSGALG00010010309 | 0.81170232  | 0.404853121 |
| ENSGALG00010010310 | 0.957182283 | 0.300244766 |
| ENSGALG00010010311 | 0.922412239 | 0.389785751 |
| ENSGALG00010010312 | 0.466243047 | 0.142226056 |
| ENSGALG00010010313 | 0.804835157 | 0.18419454  |
| ENSGALG00010010314 | 0.765645483 | 0.231097259 |
| ENSGALG00010010315 | 0.421993023 | 0.219740936 |
| ENSGALG00010010316 | 0.367202845 | 0.454724026 |
| ENSGALG00010010317 | 0.460148782 | 0.2896749   |
| ENSGALG00010010320 | 0.74876301  | 0.234544452 |
| ENSGALG00010010321 | 0.759272841 | 0.184905069 |
| ENSGALG00010010322 | 0.92807649  | 0.261486134 |
| ENSGALG00010010323 | 0.992756385 | 0.32516058  |
| ENSGALG00010010324 | 0.370787514 | 0.160871034 |
| ENSGALG00010010325 | 0.313216017 | 0.204511642 |
| ENSGALG00010010326 | 0.97896847  | 0.350637503 |
| ENSGALG00010010327 | 0.988203436 | 0.275279402 |
| ENSGALG00010010328 | 0.08548889  | 0.145662585 |
| ENSGALG00010010330 | 0.929193865 | 0.304986006 |
| ENSGALG00010010331 | 0.393915379 | 0.139646271 |
| ENSGALG00010010333 | 0.809920472 | 0.249471472 |
| ENSGALG00010010334 | 0.797066443 | 0.296878094 |
| ENSGALG00010010335 | 0.842166879 | 0.249920826 |
| ENSGALG00010010336 | 0.911159036 | 0.257005606 |
| ENSGALG00010010337 | 0.921176741 | 0.354337892 |
| ENSGALG00010010338 | 0.713946074 | 0.29789814  |
| ENSGALG00010010339 | 0.390553776 | 0.106303683 |
| ENSGALG00010010341 | 0.441737496 | 0.369076841 |
| ENSGALG00010010342 | 0.748539199 | 0.361594409 |
| ENSGALG00010010344 | 0.343342293 | 0.423010613 |
| ENSGALG00010010345 | 0.945998276 | 0.178375286 |
| ENSGALG00010010346 | 0.440873949 | 0.093501618 |
| ENSGALG00010010347 | 0.904582681 | 0.205589308 |
| ENSGALG00010010348 | 0.176956913 | 0.465439095 |
| ENSGALG00010010349 | 0.631400194 | 0.122557308 |
| ENSGALG00010010351 | 0.744936869 | 0.238792485 |
| ENSGALG00010010352 | 0.464656865 | 0.468668024 |
| ENSGALG00010010353 | 0.888449997 | 0.319380767 |
| ENSGALG00010010355 | 0.466130064 | 0.167759686 |
| ENSGALG00010010356 | 0.977602473 | 0.330486734 |
| ENSGALG00010010357 | 0.835086621 | 0.297910523 |
| ENSGALG00010010358 | 0.337333824 | 0.008880196 |
| ENSGALG00010010360 | 0.433328733 | 0.337858113 |
| ENSGALG00010010361 | 0.362967989 | 0.1879193   |
| ENSGALG00010010365 | 0.068192757 | 0.007193302 |
| ENSGALG00010010366 | 0.693991922 | 0.270793962 |
| ENSGALG00010010367 | 0.067815929 | 0.164296756 |

|                    |             |             |
|--------------------|-------------|-------------|
| ENSGALG00010010368 | 0.367549616 | 0.036322225 |
| ENSGALG00010010369 | 0.835307142 | 0.674535491 |
| ENSGALG00010010370 | 0.545041237 | 0.115317641 |
| ENSGALG00010010371 | 0.84541585  | 0.327716732 |
| ENSGALG00010010373 | 0.648134887 | 0.218056737 |
| ENSGALG00010010374 | 0.967233056 | 0.33270684  |
| ENSGALG00010010376 | 0.386681857 | 0.128510075 |
| ENSGALG00010010378 | 0.467504183 | 0.264594505 |
| ENSGALG00010010379 | 0.647684244 | 0.19267364  |
| ENSGALG00010010381 | 0.944353341 | 0.214482528 |
| ENSGALG00010010382 | 0.989547267 | 0.374853375 |
| ENSGALG00010010383 | 0.43092684  | 0.38683132  |
| ENSGALG00010010384 | 0.91732754  | 0.280389077 |
| ENSGALG00010010385 | 0.741781307 | 0.492617039 |
| ENSGALG00010010386 | 0.908883194 | 0.263230451 |
| ENSGALG00010010388 | 0.483524641 | 0.406518875 |
| ENSGALG00010010389 | 0.736039168 | 0.161888867 |
| ENSGALG00010010390 | 0.782175755 | 0.445500326 |
| ENSGALG00010010391 | 0.023242472 | 0.240119338 |
| ENSGALG00010010392 | 0.390721088 | 0.058000471 |
| ENSGALG00010010393 | 0.202140821 | 0.385294898 |
| ENSGALG00010010394 | 0.867562318 | 0.358119735 |
| ENSGALG00010010396 | 0.226564475 | 0.120476896 |
| ENSGALG00010010397 | 0.853970782 | 0.185182525 |
| ENSGALG00010010399 | 0.843618685 | 0.294623406 |
| ENSGALG00010010401 | 0.070383912 | 0.185963327 |
| ENSGALG00010010402 | 0.277566769 | 0.107857127 |
| ENSGALG00010010404 | 0.937505984 | 0.400601285 |
| ENSGALG00010010405 | 0.912641225 | 0.243159298 |
| ENSGALG00010010406 | 0.305130081 | 0.10220604  |
| ENSGALG00010010407 | 0.85315329  | 0.270158266 |
| ENSGALG00010010408 | 0.442134896 | 0.064111828 |
| ENSGALG00010010409 | 0.219386918 | 0.079388121 |
| ENSGALG00010010410 | 0.988842782 | 0.339691355 |
| ENSGALG00010010411 | 0.958142053 | 0.220452102 |
| ENSGALG00010010415 | 0.459864997 | 0.246454025 |
| ENSGALG00010010416 | 0.951612463 | 0.321323993 |
| ENSGALG00010010417 | 0.641498561 | 0.22856668  |
| ENSGALG00010010418 | 0.006923441 | 0.126535936 |
| ENSGALG00010010419 | 0.144177663 | 0.516759034 |
| ENSGALG00010010420 | 0.67701722  | 0.169625866 |
| ENSGALG00010010421 | 0.968946288 | 0.314986531 |
| ENSGALG00010010422 | 0.990009209 | 0.342948609 |
| ENSGALG00010010423 | 0.911723553 | 0.263442434 |
| ENSGALG00010010425 | 0.336367567 | 0.030172521 |
| ENSGALG00010010430 | 0.726775044 | 0.274928554 |
| ENSGALG00010010431 | 0.939485136 | 0.402666393 |
| ENSGALG00010010434 | 0.950818722 | 0.295518623 |
| ENSGALG00010010435 | 0.973095436 | 0.384187225 |
| ENSGALG00010010438 | 0.988456934 | 0.322914307 |
| ENSGALG00010010439 | 0.939190105 | 0.311982415 |
| ENSGALG00010010444 | 0.477723379 | 0.270201543 |
| ENSGALG00010010445 | 0.992822808 | 0.326837956 |
| ENSGALG00010010446 | 0.030155467 | 0.225953914 |
| ENSGALG00010010447 | 0.95126183  | 0.328118317 |
| ENSGALG00010010448 | 0.076519665 | 0.042599145 |

|                    |             |             |
|--------------------|-------------|-------------|
| ENSGALG00010010449 | 0.269272437 | 0.073182666 |
| ENSGALG00010010450 | 0.51392991  | 0.257707667 |
| ENSGALG00010010451 | 0.940516614 | 0.420617156 |
| ENSGALG00010010452 | 0.496129098 | 0.136745135 |
| ENSGALG00010010453 | 0.307179697 | 0.307925909 |
| ENSGALG00010010456 | 0.215913373 | 0.29558641  |
| ENSGALG00010010457 | 0.566072598 | 0.049290258 |
| ENSGALG00010010460 | 0.980871397 | 0.346206056 |
| ENSGALG00010010461 | 0.965577063 | 0.38182764  |
| ENSGALG00010010462 | 0.966677536 | 0.441451174 |
| ENSGALG00010010463 | 0.897994    | 0.295443713 |
| ENSGALG00010010464 | 0.724147819 | 0.367546889 |
| ENSGALG00010010465 | 0.672255105 | 0.579468498 |
| ENSGALG00010010466 | 0.494125689 | 0.254787054 |
| ENSGALG00010010467 | 0.899694175 | 0.187770982 |
| ENSGALG00010010468 | 0.441476394 | 0.02844079  |
| ENSGALG00010010469 | 0.255000842 | 0.231142866 |
| ENSGALG00010010470 | 0.484436816 | 0.071658837 |
| ENSGALG00010010471 | 0.718090778 | 0.450854931 |
| ENSGALG00010010472 | 0.755051928 | 0.445740667 |
| ENSGALG00010010473 | 0.861881829 | 0.228319641 |
| ENSGALG00010010474 | 0.800208511 | 0.35834985  |
| ENSGALG00010010475 | 0.134631022 | 0.264915811 |
| ENSGALG00010010476 | 0.266137114 | 0.107784983 |
| ENSGALG00010010477 | 0.910457955 | 0.245279862 |
| ENSGALG00010010479 | 0.117583042 | 0.267532169 |
| ENSGALG00010010480 | 0.187514554 | 0.108479243 |
| ENSGALG00010010482 | 0.198700219 | 0.455786488 |
| ENSGALG00010010483 | 0.586716586 | 0.060003899 |
| ENSGALG00010010484 | 0.386902872 | 0.202119071 |
| ENSGALG00010010486 | 0.51175427  | 0.022702561 |
| ENSGALG00010010487 | 0.841327303 | 0.238285078 |
| ENSGALG00010010488 | 0.251284199 | 0.12166773  |
| ENSGALG00010010490 | 0.540886269 | 0.256059867 |
| ENSGALG00010010491 | 0.36047241  | 0.115986332 |
| ENSGALG00010010494 | 0.977415912 | 0.263657818 |
| ENSGALG00010010495 | 0.867506041 | 0.331415844 |
| ENSGALG00010010496 | 0.987454172 | 0.317333478 |
| ENSGALG00010010499 | 0.782658317 | 0.272250105 |
| ENSGALG00010010504 | 0.140956203 | 0.026059303 |
| ENSGALG00010010505 | 0.856927641 | 0.428363001 |
| ENSGALG00010010506 | 0.128434457 | 0.147990742 |
| ENSGALG00010010511 | 0.38137981  | 0.201921904 |
| ENSGALG00010010512 | 0.984164104 | 0.273914011 |
| ENSGALG00010010515 | 0.955677823 | 0.356869396 |
| ENSGALG00010010516 | 0.694378442 | 0.272160328 |
| ENSGALG00010010517 | 0.208550923 | 0.676301294 |
| ENSGALG00010010520 | 0.474616183 | 0.173292476 |
| ENSGALG00010010521 | 0.924823984 | 0.135834933 |
| ENSGALG00010010523 | 0.899112653 | 0.076261462 |
| ENSGALG00010010524 | 0.373119456 | 0.207838807 |
| ENSGALG00010010526 | 0.47552848  | 0.187758975 |
| ENSGALG00010010528 | 0.989690058 | 0.354670728 |
| ENSGALG00010010532 | 0.381608622 | 0.094262957 |
| ENSGALG00010010534 | 0.871922375 | 0.314426771 |
| ENSGALG00010010535 | 0.464193274 | 0.175432391 |

|                    |             |             |
|--------------------|-------------|-------------|
| ENSGALG00010010536 | 0.000893823 | 0.500599188 |
| ENSGALG00010010537 | 0.379394869 | 0.170237467 |
| ENSGALG00010010540 | 0.21193208  | 0.506243928 |
| ENSGALG00010010541 | 0.640135105 | 0.299555473 |
| ENSGALG00010010542 | 0.523973097 | 0.275621888 |
| ENSGALG00010010543 | 0.844850896 | 0.089227604 |
| ENSGALG00010010544 | 0.8239731   | 0.404359798 |
| ENSGALG00010010546 | 0.987858989 | 0.325193447 |
| ENSGALG00010010547 | 0.931316379 | 0.206290396 |
| ENSGALG00010010548 | 0.048532643 | 0.007975711 |
| ENSGALG00010010549 | 0.174807695 | 0.132889743 |
| ENSGALG00010010550 | 0.388060988 | 0.153227889 |
| ENSGALG00010010551 | 0.678865142 | 0.357472548 |
| ENSGALG00010010552 | 0.277566769 | 0.107857127 |
| ENSGALG00010010553 | 0.569566071 | 0.180296093 |
| ENSGALG00010010554 | 0.609203231 | 0.194366996 |
| ENSGALG00010010555 | 0.494157879 | 0.195125042 |
| ENSGALG00010010557 | 0.017246661 | 0.459476749 |
| ENSGALG00010010558 | 0.65518014  | 0.017858217 |
| ENSGALG00010010559 | 0.431646998 | 0.267777202 |
| ENSGALG00010010561 | 0.923404622 | 0.196914684 |
| ENSGALG00010010563 | 0.095474074 | 0.13183335  |
| ENSGALG00010010564 | 0.56646333  | 0.445221062 |
| ENSGALG00010010566 | 0.10738367  | 0.206840404 |
| ENSGALG00010010567 | 0.029318055 | 0.146600019 |
| ENSGALG00010010568 | 0.600774745 | 0.377683421 |
| ENSGALG00010010569 | 0.580724372 | 0.194795499 |
| ENSGALG00010010571 | 0.334984929 | 0.421560278 |
| ENSGALG00010010572 | 0.605931924 | 0.273959359 |
| ENSGALG00010010573 | 0.90243017  | 0.302373767 |
| ENSGALG00010010575 | 0.072898767 | 0.415947721 |
| ENSGALG00010010577 | 0.993037651 | 0.326659453 |
| ENSGALG00010010578 | 0.975437533 | 0.308740799 |
| ENSGALG00010010582 | 0.632946553 | 0.375081354 |
| ENSGALG00010010583 | 0.36437197  | 0.115555231 |
| ENSGALG00010010584 | 0.695334012 | 0.089498995 |
| ENSGALG00010010585 | 0.451792579 | 0.299152714 |
| ENSGALG00010010586 | 0.77958151  | 0.179483936 |
| ENSGALG00010010587 | 0.872068773 | 0.367706934 |
| ENSGALG00010010588 | 0.651601887 | 0.236319674 |
| ENSGALG00010010589 | 0.583993759 | 0.216827313 |
| ENSGALG00010010591 | 0.591493884 | 0.184688407 |
| ENSGALG00010010592 | 0.078194497 | 0.171196888 |
| ENSGALG00010010593 | 0.87993504  | 0.331117203 |
| ENSGALG00010010595 | 0.556633076 | 0.241380052 |
| ENSGALG00010010596 | 0.772482607 | 0.488509079 |
| ENSGALG00010010597 | 0.385953062 | 0.133261917 |
| ENSGALG00010010598 | 0.440528123 | 0.171424878 |
| ENSGALG00010010599 | 0.984517352 | 0.264804649 |
| ENSGALG00010010600 | 0.19264856  | 0.407560136 |
| ENSGALG00010010601 | 0.073355415 | 0.028330384 |
| ENSGALG00010010602 | 0.311915895 | 0.474009313 |
| ENSGALG00010010603 | 0.123292688 | 0.248348235 |
| ENSGALG00010010604 | 0.982058213 | 0.372295311 |
| ENSGALG00010010605 | 0.626681621 | 0.035416091 |
| ENSGALG00010010612 | 0.567993953 | 0.172709698 |



|                    |             |             |
|--------------------|-------------|-------------|
| ENSGALG00010010614 | 0.401641365 | 0.107199432 |
| ENSGALG00010010615 | 0.530128944 | 0.063158754 |
| ENSGALG00010010618 | 0.94463132  | 0.342132724 |
| ENSGALG00010010619 | 0.498651561 | 0.027016777 |
| ENSGALG00010010620 | 0.925028383 | 0.268799123 |
| ENSGALG00010010621 | 0.425321441 | 0.082218767 |
| ENSGALG00010010622 | 0.136793605 | 0.094261048 |
| ENSGALG00010010623 | 0.900469846 | 0.388864009 |
| ENSGALG00010010624 | 0.10717702  | 0.143906514 |
| ENSGALG00010010625 | 0.645377603 | 0.23498728  |
| ENSGALG00010010626 | 0.716369083 | 0.12848447  |
| ENSGALG00010010628 | 0.044601559 | 0.198257206 |
| ENSGALG00010010629 | 0.110714723 | 0.379244672 |
| ENSGALG00010010630 | 0.472394899 | 0.257481238 |
| ENSGALG00010010631 | 0.462237741 | 0.444409777 |
| ENSGALG00010010632 | 0.743726272 | 0.224438583 |
| ENSGALG00010010633 | 0.992533498 | 0.347552159 |
| ENSGALG00010010635 | 0.94216117  | 0.325772455 |
| ENSGALG00010010638 | 0.157578276 | 0.240052996 |
| ENSGALG00010010641 | 0.122858901 | 0.224023935 |
| ENSGALG00010010642 | 0.627951597 | 0.232879898 |
| ENSGALG00010010645 | 0.145203817 | 0.352497218 |
| ENSGALG00010010646 | 0.924579814 | 0.378928039 |
| ENSGALG00010010648 | 0.263394289 | 0.036129588 |
| ENSGALG00010010650 | 0.304133466 | 0.450346192 |
| ENSGALG00010010651 | 0.828952384 | 0.111123669 |
| ENSGALG00010010653 | 0.877645913 | 0.158653242 |
| ENSGALG00010010655 | 0.76310708  | 0.55706448  |
| ENSGALG00010010657 | 0.570939742 | 0.338644284 |
| ENSGALG00010010659 | 0.864154161 | 0.351611508 |
| ENSGALG00010010660 | 0.778087112 | 0.301725836 |
| ENSGALG00010010661 | 0.858317619 | 0.166548343 |
| ENSGALG00010010662 | 0.918643981 | 0.336433881 |
| ENSGALG00010010663 | 0.95338759  | 0.247694201 |
| ENSGALG00010010666 | 0.767293643 | 0.241898791 |
| ENSGALG00010010667 | 0.511041481 | 0.638841585 |
| ENSGALG00010010671 | 0.827964961 | 0.207248657 |
| ENSGALG00010010672 | 0.157487356 | 0.242311849 |
| ENSGALG00010010673 | 0.11781451  | 0.122917091 |
| ENSGALG00010010677 | 0.581375575 | 0.111169039 |
| ENSGALG00010010678 | 0.78852219  | 0.329694244 |
| ENSGALG00010010679 | 0.172415916 | 0.257085955 |
| ENSGALG00010010680 | 0.260632516 | 0.277948498 |
| ENSGALG00010010681 | 0.560700681 | 0.140712786 |
| ENSGALG00010010682 | 0.960932038 | 0.371935943 |
| ENSGALG00010010683 | 0.54322997  | 0.22551485  |
| ENSGALG00010010685 | 0.942769847 | 0.268653976 |
| ENSGALG00010010686 | 0.572414378 | 0.033218976 |
| ENSGALG00010010688 | 0.993829661 | 0.313464295 |
| ENSGALG00010010689 | 0.925826942 | 0.247248019 |
| ENSGALG00010010690 | 0.97471422  | 0.318439425 |
| ENSGALG00010010692 | 0.130515589 | 0.11260751  |
| ENSGALG00010010693 | 0.954797545 | 0.263202919 |
| ENSGALG00010010695 | 0.005068257 | 0.483321659 |
| ENSGALG00010010696 | 0.47239257  | 0.121930621 |
| ENSGALG00010010697 | 0.933689528 | 0.30047899  |

|                    |             |             |
|--------------------|-------------|-------------|
| ENSGALG00010010698 | 0.490881081 | 0.249287919 |
| ENSGALG00010010699 | 0.888430517 | 0.265200709 |
| ENSGALG00010010702 | 0.266137114 | 0.107784983 |
| ENSGALG00010010703 | 0.708149714 | 0.533898171 |
| ENSGALG00010010704 | 0.755306552 | 0.182049347 |
| ENSGALG00010010705 | 0.112954512 | 0.102150984 |
| ENSGALG00010010706 | 0.20221497  | 0.144419279 |
| ENSGALG00010010707 | 0.564599148 | 0.257323578 |
| ENSGALG00010010708 | 0.184592678 | 0.041408745 |
| ENSGALG00010010709 | 0.632817849 | 0.0444547   |
| ENSGALG00010010710 | 0.898949752 | 0.232220125 |
| ENSGALG00010010711 | 0.417836688 | 0.042675186 |
| ENSGALG00010010712 | 0.702978446 | 0.256859938 |
| ENSGALG00010010713 | 0.769746468 | 0.207952679 |
| ENSGALG00010010714 | 0.283468811 | 0.33822564  |
| ENSGALG00010010715 | 0.942330514 | 0.31865944  |
| ENSGALG00010010716 | 0.021308589 | 0.164876077 |
| ENSGALG00010010717 | 0.115957159 | 0.237961918 |
| ENSGALG00010010718 | 0.042130527 | 0.126956878 |
| ENSGALG00010010719 | 0.969222919 | 0.291886202 |
| ENSGALG00010010720 | 0.578552359 | 0.409851544 |
| ENSGALG00010010722 | 0.784989458 | 0.054382636 |
| ENSGALG00010010724 | 0.079926982 | 0.497962761 |
| ENSGALG00010010725 | 0.906168704 | 0.289213489 |
| ENSGALG00010010728 | 0.992137039 | 0.347025217 |
| ENSGALG00010010729 | 0.869587676 | 0.266041964 |
| ENSGALG00010010730 | 0.991902511 | 0.329244513 |
| ENSGALG00010010732 | 0.599378721 | 0.176728778 |
| ENSGALG00010010733 | 0.784711074 | 0.205339708 |
| ENSGALG00010010734 | 0.898534749 | 0.17903708  |
| ENSGALG00010010735 | 0.110916976 | 0.224512995 |
| ENSGALG00010010736 | 0.994254484 | 0.335670804 |
| ENSGALG00010010740 | 0.922023783 | 0.295038879 |
| ENSGALG00010010742 | 0.962681958 | 0.262251415 |
| ENSGALG00010010743 | 0.188941272 | 0.300767939 |
| ENSGALG00010010745 | 0.077170756 | 0.047187224 |
| ENSGALG00010010748 | 0.927263744 | 0.388757951 |
| ENSGALG00010010749 | 0.969140232 | 0.395162711 |
| ENSGALG00010010750 | 0.492557799 | 0.141952549 |
| ENSGALG00010010751 | 0.960892644 | 0.333547429 |
| ENSGALG00010010752 | 0.338341761 | 0.318940424 |
| ENSGALG00010010753 | 0.270515323 | 0.030303391 |
| ENSGALG00010010754 | 0.514718255 | 0.107977883 |
| ENSGALG00010010756 | 0.224230201 | 0.094815562 |
| ENSGALG00010010759 | 0.354910093 | 0.305193946 |
| ENSGALG00010010760 | 0.903634964 | 0.436157623 |
| ENSGALG00010010761 | 0.952394607 | 0.207015151 |
| ENSGALG00010010762 | 0.70012884  | 0.084377748 |
| ENSGALG00010010763 | 0.794797956 | 0.129600855 |
| ENSGALG00010010764 | 0.606101407 | 0.013803163 |
| ENSGALG00010010765 | 0.99289244  | 0.329374474 |
| ENSGALG00010010766 | 0.772793423 | 0.226607151 |
| ENSGALG00010010767 | 0.363600201 | 0.059295317 |
| ENSGALG00010010768 | 0.905799031 | 0.378185814 |
| ENSGALG00010010769 | 0.969294847 | 0.304929662 |
| ENSGALG00010010770 | 0.594017655 | 0.240067851 |

|                    |             |             |
|--------------------|-------------|-------------|
| ENSGALG00010010771 | 0.892001671 | 0.214029377 |
| ENSGALG00010010772 | 0.982277316 | 0.33764957  |
| ENSGALG00010010773 | 0.863265974 | 0.35411474  |
| ENSGALG00010010774 | 0.92741256  | 0.255831936 |
| ENSGALG00010010775 | 0.270451009 | 0.090541667 |
| ENSGALG00010010776 | 0.6711272   | 0.068698517 |
| ENSGALG00010010777 | 0.863444655 | 0.149901445 |
| ENSGALG00010010778 | 0.579907645 | 0.168644607 |
| ENSGALG00010010779 | 0.972828284 | 0.258515286 |
| ENSGALG00010010780 | 0.006740375 | 0.0038078   |
| ENSGALG00010010781 | 0.910284706 | 0.279521415 |
| ENSGALG00010010783 | 0.856776423 | 0.225125594 |
| ENSGALG00010010784 | 0.71396034  | 0.349059276 |
| ENSGALG00010010786 | 0.762974598 | 0.026027191 |
| ENSGALG00010010787 | 0.383708263 | 0.151865425 |
| ENSGALG00010010788 | 0.764426994 | 0.197117023 |
| ENSGALG00010010789 | 0.314845355 | 0.218965371 |
| ENSGALG00010010790 | 0.128609649 | 0.187071108 |
| ENSGALG00010010791 | 0.396587792 | 0.01257238  |
| ENSGALG00010010792 | 0.785786881 | 0.244294148 |
| ENSGALG00010010796 | 0.930718531 | 0.448163143 |
| ENSGALG00010010799 | 0.562474264 | 0.12893268  |
| ENSGALG00010010800 | 0.927419074 | 0.256116575 |
| ENSGALG00010010802 | 0.731358839 | 0.282648079 |
| ENSGALG00010010803 | 0.781892521 | 0.015499224 |
| ENSGALG00010010804 | 0.614196805 | 0.240945378 |
| ENSGALG00010010805 | 0.711560292 | 0.238538958 |
| ENSGALG00010010806 | 0.00853842  | 0.154655808 |
| ENSGALG00010010807 | 0.543718243 | 0.147179149 |
| ENSGALG00010010809 | 0.256657413 | 0.406164683 |
| ENSGALG00010010810 | 0.811002889 | 0.2694747   |
| ENSGALG00010010811 | 0.501362731 | 0.419745076 |
| ENSGALG00010010812 | 0.46436837  | 0.184836279 |
| ENSGALG00010010813 | 0.987611591 | 0.338868371 |
| ENSGALG00010010814 | 0.358971653 | 0.072654586 |
| ENSGALG00010010816 | 0.934302778 | 0.303142515 |
| ENSGALG00010010817 | 0.48044056  | 0.138207522 |
| ENSGALG00010010820 | 0.871534034 | 0.326732962 |
| ENSGALG00010010821 | 0.867297337 | 0.255947293 |
| ENSGALG00010010822 | 0.510538768 | 0.104119995 |
| ENSGALG00010010823 | 0.89159243  | 0.415796756 |
| ENSGALG00010010824 | 0.947633004 | 0.326360587 |
| ENSGALG00010010825 | 0.797175966 | 0.192947366 |
| ENSGALG00010010826 | 0.565757076 | 0.18615583  |
| ENSGALG00010010827 | 0.459318714 | 0.096452807 |
| ENSGALG00010010828 | 0.84666685  | 0.547300805 |
| ENSGALG00010010829 | 0.799249775 | 0.190702763 |
| ENSGALG00010010831 | 0.972912935 | 0.228946708 |
| ENSGALG00010010832 | 0.678061371 | 0.118568669 |
| ENSGALG00010010834 | 0.726345648 | 0.195630679 |
| ENSGALG00010010836 | 0.938070344 | 0.311440048 |
| ENSGALG00010010837 | 0.956370595 | 0.244161524 |
| ENSGALG00010010838 | 0.41139081  | 0.248450937 |
| ENSGALG00010010840 | 0.916204275 | 0.381291439 |
| ENSGALG00010010841 | 0.955698019 | 0.408648677 |
| ENSGALG00010010843 | 0.959656626 | 0.370295001 |

|                    |             |             |
|--------------------|-------------|-------------|
| ENSGALG00010010844 | 0.817777449 | 0.211957456 |
| ENSGALG00010010845 | 0.648746617 | 0.306172142 |
| ENSGALG00010010846 | 0.154373696 | 0.138164639 |
| ENSGALG00010010848 | 0.5570377   | 0.412482138 |
| ENSGALG00010010849 | 0.896996054 | 0.13960585  |
| ENSGALG00010010850 | 0.965247639 | 0.332054943 |
| ENSGALG00010010851 | 0.898585394 | 0.456521892 |
| ENSGALG00010010852 | 0.725570728 | 0.27774591  |
| ENSGALG00010010853 | 0.547640017 | 0.150537391 |
| ENSGALG00010010854 | 0.795960479 | 0.301727216 |
| ENSGALG00010010855 | 0.947164504 | 0.353818398 |
| ENSGALG00010010856 | 0.211761593 | 0.496217444 |
| ENSGALG00010010857 | 0.90680715  | 0.370877877 |
| ENSGALG00010010859 | 0.802578946 | 0.181459942 |
| ENSGALG00010010860 | 0.761473925 | 0.36967377  |
| ENSGALG00010010861 | 0.032306874 | 0.011769149 |
| ENSGALG00010010862 | 0.522734381 | 0.048509883 |
| ENSGALG00010010863 | 0.266137114 | 0.107784983 |
| ENSGALG00010010864 | 0.392009975 | 0.054308127 |
| ENSGALG00010010865 | 0.95587954  | 0.288199408 |
| ENSGALG00010010866 | 0.883709269 | 0.316490873 |
| ENSGALG00010010867 | 0.544727614 | 0.26619074  |
| ENSGALG00010010868 | 0.870829181 | 0.201956712 |
| ENSGALG00010010869 | 0.963919581 | 0.338000007 |
| ENSGALG00010010870 | 0.197686952 | 0.23925456  |
| ENSGALG00010010871 | 0.969044703 | 0.322929342 |
| ENSGALG00010010872 | 0.311289807 | 0.13851383  |
| ENSGALG00010010873 | 0.803628056 | 0.209743719 |
| ENSGALG00010010874 | 0.910811549 | 0.174397516 |
| ENSGALG00010010875 | 0.496122232 | 0.304116478 |
| ENSGALG00010010876 | 0.938469825 | 0.34625905  |
| ENSGALG00010010880 | 0.930686606 | 0.297346384 |
| ENSGALG00010010882 | 0.923925237 | 0.265219753 |
| ENSGALG00010010884 | 0.966001671 | 0.278592135 |
| ENSGALG00010010885 | 0.888567213 | 0.193351495 |
| ENSGALG00010010887 | 0.898871148 | 0.195269894 |
| ENSGALG00010010888 | 0.978285802 | 0.340975082 |
| ENSGALG00010010889 | 0.913990408 | 0.391141534 |
| ENSGALG00010010890 | 0.131375389 | 0.074747141 |
| ENSGALG00010010891 | 0.876765123 | 0.478438644 |
| ENSGALG00010010892 | 0.082583701 | 0.247683759 |
| ENSGALG00010010893 | 0.907303894 | 0.288428188 |
| ENSGALG00010010894 | 0.749535867 | 0.545435675 |
| ENSGALG00010010895 | 0.949346816 | 0.299773287 |
| ENSGALG00010010896 | 0.940352519 | 0.23818032  |
| ENSGALG00010010897 | 0.977766441 | 0.331062334 |
| ENSGALG00010010900 | 0.942448025 | 0.305978252 |
| ENSGALG00010010901 | 0.124312566 | 0.130525028 |
| ENSGALG00010010902 | 0.783154159 | 0.394866688 |
| ENSGALG00010010903 | 0.336037988 | 0.029536793 |
| ENSGALG00010010904 | 0.991886872 | 0.310013785 |
| ENSGALG00010010905 | 0.834114526 | 0.485415954 |
| ENSGALG00010010906 | 0.748497843 | 0.074438699 |
| ENSGALG00010010907 | 0.102557187 | 0.376152885 |
| ENSGALG00010010908 | 0.878035151 | 0.141216361 |
| ENSGALG00010010909 | 0.583914086 | 0.007883887 |

|                    |             |             |
|--------------------|-------------|-------------|
| ENSGALG00010010910 | 0.94360391  | 0.290455337 |
| ENSGALG00010010911 | 0.918228721 | 0.085825717 |
| ENSGALG00010010912 | 0.90395677  | 0.490720861 |
| ENSGALG00010010913 | 0.80378905  | 0.055190459 |
| ENSGALG00010010914 | 0.480800697 | 0.116510583 |
| ENSGALG00010010915 | 0.932582933 | 0.194012817 |
| ENSGALG00010010916 | 0.370844335 | 0.111056801 |
| ENSGALG00010010917 | 0.952176264 | 0.277145861 |
| ENSGALG00010010918 | 0.741068786 | 0.118797156 |
| ENSGALG00010010919 | 0.42909162  | 0.286061018 |
| ENSGALG00010010920 | 0.794606715 | 0.176965983 |
| ENSGALG00010010921 | 0.767115253 | 0.307197937 |
| ENSGALG00010010922 | 0.965218179 | 0.274388645 |
| ENSGALG00010010923 | 0.461161649 | 0.341414483 |
| ENSGALG00010010924 | 0.709765942 | 0.15242107  |
| ENSGALG00010010925 | 0.899957307 | 0.266619675 |
| ENSGALG00010010926 | 0.429971141 | 0.081698076 |
| ENSGALG00010010928 | 0.612868206 | 0.35438206  |
| ENSGALG00010010929 | 0.785752995 | 0.330797131 |
| ENSGALG00010010930 | 0.297192963 | 0.952693364 |
| ENSGALG00010010931 | 0.746988909 | 0.428952942 |
| ENSGALG00010010932 | 0.813637683 | 0.351928898 |
| ENSGALG00010010933 | 0.858395293 | 0.049226803 |
| ENSGALG00010010934 | 0.813801767 | 0.128719898 |
| ENSGALG00010010935 | 0.893571242 | 0.436196953 |
| ENSGALG00010010936 | 0.354532559 | 0.228848641 |
| ENSGALG00010010937 | 0.14366844  | 0.015026333 |
| ENSGALG00010010938 | 0.023594528 | 0.486075456 |
| ENSGALG00010010939 | 0.712928212 | 0.314367435 |
| ENSGALG00010010940 | 0.644161376 | 0.004376451 |
| ENSGALG00010010941 | 0.991765688 | 0.341921979 |
| ENSGALG00010010942 | 0.818256684 | 0.050106675 |
| ENSGALG00010010943 | 0.886856856 | 0.308193089 |
| ENSGALG00010010945 | 0.99107781  | 0.36711738  |
| ENSGALG00010010946 | 0.571186892 | 0.241357489 |
| ENSGALG00010010947 | 0.519607237 | 0.039196098 |
| ENSGALG00010010948 | 0.740576262 | 0.339823605 |
| ENSGALG00010010949 | 0.970961533 | 0.288225503 |
| ENSGALG00010010950 | 0.542411648 | 0.284586448 |
| ENSGALG00010010951 | 0.684205002 | 0.192766142 |
| ENSGALG00010010952 | 0.549736085 | 0.088916962 |
| ENSGALG00010010953 | 0.558021529 | 0.044062873 |
| ENSGALG00010010954 | 0.799510222 | 0.239356481 |
| ENSGALG00010010955 | 0.725974645 | 0.441812948 |
| ENSGALG00010010956 | 0.055947878 | 0.337049294 |
| ENSGALG00010010957 | 0.983702574 | 0.273520107 |
| ENSGALG00010010958 | 0.721921798 | 0.264211415 |
| ENSGALG00010010959 | 0.499524969 | 0.015914312 |
| ENSGALG00010010960 | 0.635056119 | 0.193648766 |
| ENSGALG00010010961 | 0.304134323 | 0.47839316  |
| ENSGALG00010010962 | 0.273984384 | 0.050918496 |
| ENSGALG00010010963 | 0.766239006 | 0.300526816 |
| ENSGALG00010010964 | 0.062136651 | 0.466268865 |
| ENSGALG00010010965 | 0.13727222  | 0.231536724 |
| ENSGALG00010010966 | 0.877294119 | 0.216990649 |
| ENSGALG00010010967 | 0.971012377 | 0.29804157  |

|                    |             |             |
|--------------------|-------------|-------------|
| ENSGALG00010010968 | 0.526596581 | 0.143439885 |
| ENSGALG00010010970 | 0.90104692  | 0.352304369 |
| ENSGALG00010010971 | 0.799625401 | 0.612161516 |
| ENSGALG00010010972 | 0.211807839 | 0.239083857 |
| ENSGALG00010010973 | 0.940806445 | 0.343700565 |
| ENSGALG00010010974 | 0.656911566 | 0.02030658  |
| ENSGALG00010010975 | 0.890684342 | 0.33297226  |
| ENSGALG00010010976 | 0.628364438 | 0.214757661 |
| ENSGALG00010010977 | 0.595727105 | 0.369985287 |
| ENSGALG00010010978 | 0.907222729 | 0.241673044 |
| ENSGALG00010010979 | 0.185579348 | 0.155473945 |
| ENSGALG00010010980 | 0.891717053 | 0.401629176 |
| ENSGALG00010010981 | 0.889512196 | 0.406450452 |
| ENSGALG00010010982 | 0.92820358  | 0.187004358 |
| ENSGALG00010010983 | 0.945079373 | 0.291622437 |
| ENSGALG00010010984 | 0.989011959 | 0.321621185 |
| ENSGALG00010010985 | 0.63281873  | 0.283765074 |
| ENSGALG00010010986 | 0.884105394 | 0.29796339  |
| ENSGALG00010010987 | 0.014947342 | 0.518180536 |
| ENSGALG00010010988 | 0.980302985 | 0.339437472 |
| ENSGALG00010010989 | 0.674568216 | 0.004442804 |
| ENSGALG00010010990 | 0.91369318  | 0.235216732 |
| ENSGALG00010010991 | 0.918345529 | 0.13758421  |
| ENSGALG00010010992 | 0.859150058 | 0.324882772 |
| ENSGALG00010010993 | 0.987599205 | 0.316843946 |
| ENSGALG00010010994 | 0.709412509 | 0.212847841 |
| ENSGALG00010010995 | 0.981532583 | 0.269202662 |
| ENSGALG00010010996 | 0.21010597  | 0.276127705 |
| ENSGALG00010010997 | 0.789322557 | 0.062623142 |
| ENSGALG00010010998 | 0.989366794 | 0.291684772 |
| ENSGALG00010011000 | 0.677300404 | 0.220783306 |
| ENSGALG00010011001 | 0.910543421 | 0.275459656 |
| ENSGALG00010011003 | 0.686365343 | 0.330612125 |
| ENSGALG00010011004 | 0.324322801 | 0.206306307 |
| ENSGALG00010011006 | 0.420768286 | 0.039596267 |
| ENSGALG00010011007 | 0.910211126 | 0.24967189  |
| ENSGALG00010011008 | 0.992999801 | 0.332791159 |
| ENSGALG00010011009 | 0.924501384 | 0.20171074  |
| ENSGALG00010011010 | 0.979672322 | 0.347918006 |
| ENSGALG00010011012 | 0.923731458 | 0.253514782 |
| ENSGALG00010011013 | 0.550025861 | 0.367022777 |
| ENSGALG00010011015 | 0.836334912 | 0.209846496 |
| ENSGALG00010011016 | 0.90816844  | 0.259327813 |
| ENSGALG00010011017 | 0.741292928 | 0.080177093 |
| ENSGALG00010011018 | 0.982444603 | 0.321316594 |
| ENSGALG00010011019 | 0.346137245 | 0.052068032 |
| ENSGALG00010011020 | 0.975926427 | 0.315863802 |
| ENSGALG00010011021 | 0.031902356 | 0.12595153  |
| ENSGALG00010011022 | 0.161163382 | 0.016467566 |
| ENSGALG00010011024 | 0.193367476 | 0.254267559 |
| ENSGALG00010011025 | 0.899398025 | 0.195456873 |
| ENSGALG00010011027 | 0.949519118 | 0.469678094 |
| ENSGALG00010011028 | 0.952464848 | 0.425109713 |
| ENSGALG00010011029 | 0.981693727 | 0.323009068 |
| ENSGALG00010011030 | 0.348032803 | 0.146426442 |
| ENSGALG00010011031 | 0.911287855 | 0.263287087 |

|                    |             |             |
|--------------------|-------------|-------------|
| ENSGALG00010011032 | 0.938222115 | 0.220695677 |
| ENSGALG00010011033 | 0.62160666  | 0.335949341 |
| ENSGALG00010011034 | 0.189793615 | 0.232294369 |
| ENSGALG00010011035 | 0.394377908 | 0.086868006 |
| ENSGALG00010011036 | 0.138943243 | 0.107072059 |
| ENSGALG00010011037 | 0.271701261 | 0.072417625 |
| ENSGALG00010011038 | 0.763460949 | 0.144886362 |
| ENSGALG00010011039 | 0.442444873 | 0.250720648 |
| ENSGALG00010011040 | 0.611146259 | 0.240702414 |
| ENSGALG00010011041 | 0.356325253 | 0.179172604 |
| ENSGALG00010011042 | 0.295918706 | 0.116306489 |
| ENSGALG00010011043 | 0.346105038 | 0.189054728 |
| ENSGALG00010011044 | 0.994200281 | 0.363184862 |
| ENSGALG00010011045 | 0.555473966 | 0.063745409 |
| ENSGALG00010011046 | 0.447699804 | 0.390412082 |
| ENSGALG00010011047 | 0.579597135 | 0.036460151 |
| ENSGALG00010011049 | 0.074437696 | 0.206309501 |
| ENSGALG00010011050 | 0.884827153 | 0.220505378 |
| ENSGALG00010011051 | 0.93687624  | 0.30950914  |
| ENSGALG00010011055 | 0.954935523 | 0.227427429 |
| ENSGALG00010011056 | 0.220422002 | 0.326239399 |
| ENSGALG00010011057 | 0.955229709 | 0.308795229 |
| ENSGALG00010011059 | 0.112249285 | 0.111729914 |
| ENSGALG00010011061 | 0.934871877 | 0.297554434 |
| ENSGALG00010011062 | 0.778145825 | 0.269001044 |
| ENSGALG00010011063 | 0.325669798 | 0.21699008  |
| ENSGALG00010011064 | 0.729096974 | 0.378434106 |
| ENSGALG00010011066 | 0.379952917 | 0.147982463 |
| ENSGALG00010011067 | 0.607501121 | 0.356335331 |
| ENSGALG00010011069 | 0.254890033 | 0.049705713 |
| ENSGALG00010011070 | 0.277566769 | 0.107857127 |
| ENSGALG00010011072 | 0.426065103 | 0.031702528 |
| ENSGALG00010011074 | 0.400778541 | 0.133797302 |
| ENSGALG00010011076 | 0.250807229 | 0.097768228 |
| ENSGALG00010011077 | 0.427791392 | 0.043040161 |
| ENSGALG00010011080 | 0.173794527 | 0.059177695 |
| ENSGALG00010011082 | 0.503087719 | 0.174140093 |
| ENSGALG00010011085 | 0.990146366 | 0.371535638 |
| ENSGALG00010011086 | 0.991108077 | 0.309835848 |
| ENSGALG00010011088 | 0.311438666 | 0.529761034 |
| ENSGALG00010011089 | 0.573888108 | 0.181656699 |
| ENSGALG00010011090 | 0.015348999 | 0.251892033 |
| ENSGALG00010011091 | 0.074201562 | 0.108364953 |
| ENSGALG00010011092 | 0.136190057 | 0.325015569 |
| ENSGALG00010011093 | 0.094815613 | 0.084241463 |
| ENSGALG00010011094 | 0.763637484 | 0.168826382 |
| ENSGALG00010011095 | 0.271207923 | 0.39718463  |
| ENSGALG00010011096 | 0.287641251 | 0.080513677 |
| ENSGALG00010011097 | 0.116288353 | 0.426288055 |
| ENSGALG00010011098 | 0.108780822 | 0.554743142 |
| ENSGALG00010011099 | 0.91758024  | 0.227527927 |
| ENSGALG00010011100 | 0.39190877  | 0.131701825 |
| ENSGALG00010011101 | 0.139690722 | 0.020290881 |
| ENSGALG00010011102 | 0.795983124 | 0.193421974 |
| ENSGALG00010011103 | 0.042343157 | 0.133098028 |
| ENSGALG00010011104 | 0.750684701 | 0.357108147 |

|                    |             |             |
|--------------------|-------------|-------------|
| ENSGALG00010011106 | 0.966970386 | 0.29938174  |
| ENSGALG00010011107 | 0.860255243 | 0.221744663 |
| ENSGALG00010011109 | 0.216433634 | 0.680598293 |
| ENSGALG00010011111 | 0.977588735 | 0.312149792 |
| ENSGALG00010011113 | 0.15549669  | 0.176370565 |
| ENSGALG00010011115 | 0.045918678 | 0.141100759 |
| ENSGALG00010011116 | 0.971007189 | 0.375704136 |
| ENSGALG00010011118 | 0.963963193 | 0.372435712 |
| ENSGALG00010011119 | 0.380420727 | 0.197432745 |
| ENSGALG00010011121 | 0.899504066 | 0.304095946 |
| ENSGALG00010011123 | 0.744295501 | 0.239346488 |
| ENSGALG00010011124 | 0.978747072 | 0.237210041 |
| ENSGALG00010011125 | 0.498348919 | 0.153122678 |
| ENSGALG00010011126 | 0.867413641 | 0.287211943 |
| ENSGALG00010011128 | 0.951004772 | 0.370724604 |
| ENSGALG00010011129 | 0.723156764 | 0.220522551 |
| ENSGALG00010011130 | 0.318823904 | 0.190389365 |
| ENSGALG00010011131 | 0.413731997 | 0.244509466 |
| ENSGALG00010011133 | 0.835043203 | 0.263712153 |
| ENSGALG00010011134 | 0.300683727 | 0.461762941 |
| ENSGALG00010011136 | 0.180815449 | 0.385470115 |
| ENSGALG00010011139 | 0.879786739 | 0.201400126 |
| ENSGALG00010011141 | 0.022307196 | 0.119515171 |
| ENSGALG00010011142 | 0.77195045  | 0.261841691 |
| ENSGALG00010011143 | 0.932407794 | 0.321202208 |
| ENSGALG00010011144 | 0.947624499 | 0.318900001 |
| ENSGALG00010011145 | 0.037918858 | 0.097372492 |
| ENSGALG00010011146 | 0.431788101 | 0.011844284 |
| ENSGALG00010011148 | 0.845895216 | 0.33704306  |
| ENSGALG00010011149 | 0.202485276 | 0.089313705 |
| ENSGALG00010011150 | 0.963919674 | 0.245002676 |
| ENSGALG00010011151 | 0.901740673 | 0.389049691 |
| ENSGALG00010011152 | 0.373792563 | 0.171264927 |
| ENSGALG00010011153 | 0.467450891 | 0.16866517  |
| ENSGALG00010011155 | 0.673294141 | 0.240390357 |
| ENSGALG00010011156 | 0.025124456 | 0.111798379 |
| ENSGALG00010011157 | 0.256828349 | 0.119064955 |
| ENSGALG00010011158 | 0.188771645 | 0.172631201 |
| ENSGALG00010011159 | 0.253114587 | 0.289572198 |
| ENSGALG00010011161 | 0.986970894 | 0.391576256 |
| ENSGALG00010011166 | 0.69226945  | 0.275121833 |
| ENSGALG00010011170 | 0.988283331 | 0.322022935 |
| ENSGALG00010011171 | 0.895167849 | 0.32224306  |
| ENSGALG00010011172 | 0.078690675 | 0.085030523 |
| ENSGALG00010011173 | 0.097545881 | 0.09040332  |
| ENSGALG00010011175 | 0.792074867 | 0.284766732 |
| ENSGALG00010011176 | 0.57269461  | 0.218758253 |
| ENSGALG00010011178 | 0.380187033 | 0.425708988 |
| ENSGALG00010011181 | 0.501398143 | 0.296996655 |
| ENSGALG00010011183 | 0.706840114 | 0.478949399 |
| ENSGALG00010011184 | 0.868444242 | 0.304726103 |
| ENSGALG00010011187 | 0.124337726 | 0.271559216 |
| ENSGALG00010011189 | 0.270451009 | 0.090541667 |
| ENSGALG00010011190 | 0.345699033 | 0.113595926 |
| ENSGALG00010011191 | 0.235630588 | 0.132393411 |
| ENSGALG00010011192 | 0.891147401 | 0.298635743 |



|                    |             |             |
|--------------------|-------------|-------------|
| ENSGALG00010011193 | 0.564851479 | 0.063105465 |
| ENSGALG00010011194 | 0.740281365 | 0.329591037 |
| ENSGALG00010011196 | 0.984776388 | 0.319077174 |
| ENSGALG00010011197 | 0.97671892  | 0.313526948 |
| ENSGALG00010011198 | 0.387808463 | 0.383792675 |
| ENSGALG00010011200 | 0.458665773 | 0.33864769  |
| ENSGALG00010011202 | 0.721348301 | 0.07094435  |
| ENSGALG00010011203 | 0.970326751 | 0.276581634 |
| ENSGALG00010011204 | 0.977220787 | 0.290654019 |
| ENSGALG00010011205 | 0.354882154 | 0.213412916 |
| ENSGALG00010011206 | 0.219892668 | 0.15244855  |
| ENSGALG00010011207 | 0.122042973 | 0.145658162 |
| ENSGALG00010011208 | 0.165783327 | 0.016949743 |
| ENSGALG00010011210 | 0.719165354 | 0.235406697 |
| ENSGALG00010011211 | 0.699280058 | 0.23247242  |
| ENSGALG00010011212 | 0.970183886 | 0.197158241 |
| ENSGALG00010011213 | 0.184265256 | 0.186910607 |
| ENSGALG00010011216 | 0.565116455 | 0.186719947 |
| ENSGALG00010011218 | 0.037193636 | 0.239393609 |
| ENSGALG00010011222 | 0.913506308 | 0.390763596 |
| ENSGALG00010011226 | 0.286367932 | 0.089279855 |
| ENSGALG00010011229 | 0.841348679 | 0.099312319 |
| ENSGALG00010011231 | 0.961205224 | 0.273976316 |
| ENSGALG00010011234 | 0.797117922 | 0.398264681 |
| ENSGALG00010011235 | 0.455430788 | 0.216643181 |
| ENSGALG00010011237 | 0.266392752 | 0.185541021 |
| ENSGALG00010011239 | 0.956502635 | 0.433409538 |
| ENSGALG00010011240 | 0.207654172 | 0.198718547 |
| ENSGALG00010011244 | 0.828112575 | 0.339768268 |
| ENSGALG00010011245 | 0.31277746  | 0.230133103 |
| ENSGALG00010011246 | 0.984342045 | 0.360587381 |
| ENSGALG00010011247 | 0.544286551 | 0.013609731 |
| ENSGALG00010011249 | 0.05197934  | 0.14495833  |
| ENSGALG00010011250 | 0.937065732 | 0.329973248 |
| ENSGALG00010011251 | 0.501097353 | 0.162920055 |
| ENSGALG00010011252 | 0.490296051 | 0.147652895 |
| ENSGALG00010011253 | 0.9111842   | 0.493223686 |
| ENSGALG00010011254 | 0.605504776 | 0.050825784 |
| ENSGALG00010011255 | 0.688147388 | 0.22387638  |
| ENSGALG00010011256 | 0.04146015  | 0.388741609 |
| ENSGALG00010011259 | 0.216433634 | 0.680598293 |
| ENSGALG00010011260 | 0.966857662 | 0.319666713 |
| ENSGALG00010011261 | 0.079220401 | 0.115137619 |
| ENSGALG00010011262 | 0.439410272 | 0.163247078 |
| ENSGALG00010011263 | 0.504020497 | 0.141821405 |
| ENSGALG00010011265 | 0.871000491 | 0.264805655 |
| ENSGALG00010011267 | 0.769285353 | 0.28489452  |
| ENSGALG00010011269 | 0.85925687  | 0.226965592 |
| ENSGALG00010011270 | 0.049631859 | 0.180551362 |
| ENSGALG00010011271 | 0.959949576 | 0.355103704 |
| ENSGALG00010011272 | 0.325518582 | 0.03722157  |
| ENSGALG00010011273 | 0.961211977 | 0.319178763 |
| ENSGALG00010011274 | 0.085493117 | 0.062756127 |
| ENSGALG00010011275 | 0.840117611 | 0.352701849 |
| ENSGALG00010011277 | 0.262547348 | 0.213242632 |
| ENSGALG00010011278 | 0.474191153 | 0.190199575 |

|                    |             |             |
|--------------------|-------------|-------------|
| ENSGALG00010011280 | 0.919339897 | 0.451274859 |
| ENSGALG00010011281 | 0.307293908 | 0.091015132 |
| ENSGALG00010011282 | 0.874987912 | 0.1553329   |
| ENSGALG00010011283 | 0.593471825 | 0.617293205 |
| ENSGALG00010011284 | 0.603952078 | 0.495642047 |
| ENSGALG00010011285 | 0.671583657 | 0.15297013  |
| ENSGALG00010011287 | 0.800854394 | 0.13171559  |
| ENSGALG00010011288 | 0.100359439 | 0.09323447  |
| ENSGALG00010011290 | 0.343788084 | 0.038040212 |
| ENSGALG00010011291 | 0.378404611 | 0.21288244  |
| ENSGALG00010011293 | 0.968598143 | 0.26668281  |
| ENSGALG00010011294 | 0.534385641 | 0.391317532 |
| ENSGALG00010011295 | 0.511272699 | 0.334856458 |
| ENSGALG00010011297 | 0.994456877 | 0.336051235 |
| ENSGALG00010011299 | 0.838080534 | 0.388578998 |
| ENSGALG00010011300 | 0.871826767 | 0.324635358 |
| ENSGALG00010011302 | 0.232568609 | 0.171703899 |
| ENSGALG00010011303 | 0.405797923 | 0.13200104  |
| ENSGALG00010011304 | 0.934323675 | 0.297308457 |
| ENSGALG00010011305 | 0.415324066 | 0.273122736 |
| ENSGALG00010011306 | 0.982427014 | 0.306282425 |
| ENSGALG00010011307 | 0.12038089  | 0.196457262 |
| ENSGALG00010011308 | 0.318329187 | 0.289623907 |
| ENSGALG00010011311 | 0.974112338 | 0.348534751 |
| ENSGALG00010011312 | 0.851267972 | 0.268824    |
| ENSGALG00010011313 | 0.879006223 | 0.240528159 |
| ENSGALG00010011314 | 0.519188495 | 0.254090323 |
| ENSGALG00010011315 | 0.469664944 | 0.130078439 |
| ENSGALG00010011316 | 0.67385913  | 0.314254299 |
| ENSGALG00010011317 | 0.829487921 | 0.293800299 |
| ENSGALG00010011318 | 0.943167886 | 0.420494922 |
| ENSGALG00010011321 | 0.265649194 | 0.140140023 |
| ENSGALG00010011322 | 0.987028707 | 0.358098785 |
| ENSGALG00010011323 | 0.961745156 | 0.315964645 |
| ENSGALG00010011326 | 0.936880783 | 0.314944881 |
| ENSGALG00010011328 | 0.367899555 | 0.330436197 |
| ENSGALG00010011329 | 0.905030314 | 0.434606663 |
| ENSGALG00010011331 | 0.327629778 | 0.233401589 |
| ENSGALG00010011333 | 0.063013904 | 0.264467297 |
| ENSGALG00010011334 | 0.990398761 | 0.285408503 |
| ENSGALG00010011335 | 0.899951789 | 0.337761914 |
| ENSGALG00010011336 | 0.67861888  | 0.179255534 |
| ENSGALG00010011339 | 0.022736595 | 0.286672271 |
| ENSGALG00010011340 | 0.589408393 | 0.262363724 |
| ENSGALG00010011341 | 0.107758923 | 0.067805931 |
| ENSGALG00010011342 | 0.364899705 | 0.192638711 |
| ENSGALG00010011343 | 0.957116974 | 0.330323673 |
| ENSGALG00010011345 | 0.398154902 | 0.043415756 |
| ENSGALG00010011347 | 0.568263145 | 0.234085579 |
| ENSGALG00010011348 | 0.803447815 | 0.461212062 |
| ENSGALG00010011349 | 0.963576725 | 0.339411061 |
| ENSGALG00010011351 | 0.976004636 | 0.251393794 |
| ENSGALG00010011352 | 0.516863243 | 0.470714279 |
| ENSGALG00010011353 | 0.468655384 | 0.159156276 |
| ENSGALG00010011354 | 0.2609579   | 0.121460333 |
| ENSGALG00010011355 | 0.393293574 | 0.180300648 |

|                    |             |             |
|--------------------|-------------|-------------|
| ENSGALG00010011357 | 0.61917455  | 0.162555312 |
| ENSGALG00010011359 | 0.797049584 | 0.324862954 |
| ENSGALG00010011360 | 0.970779089 | 0.356848953 |
| ENSGALG00010011361 | 0.895237184 | 0.23033387  |
| ENSGALG00010011362 | 0.284638036 | 0.409296373 |
| ENSGALG00010011363 | 0.290760043 | 0.143635487 |
| ENSGALG00010011364 | 0.002742065 | 0.085392592 |
| ENSGALG00010011365 | 0.854716394 | 0.293019413 |
| ENSGALG00010011366 | 0.188173046 | 0.085789746 |
| ENSGALG00010011367 | 0.706010112 | 0.235524277 |
| ENSGALG00010011368 | 0.766842049 | 0.413512398 |
| ENSGALG00010011370 | 0.754733248 | 0.26417962  |
| ENSGALG00010011371 | 0.627743991 | 0.438944433 |
| ENSGALG00010011372 | 0.405243404 | 0.56256372  |
| ENSGALG00010011374 | 0.889896006 | 0.313704127 |
| ENSGALG00010011375 | 0.935031411 | 0.244845602 |
| ENSGALG00010011376 | 0.302561663 | 0.280513489 |
| ENSGALG00010011377 | 0.967615985 | 0.313203645 |
| ENSGALG00010011378 | 0.696277196 | 0.263628347 |
| ENSGALG00010011379 | 0.53536342  | 0.168858382 |
| ENSGALG00010011380 | 0.495439405 | 0.190109089 |
| ENSGALG00010011381 | 0.533800056 | 0.212344766 |
| ENSGALG00010011382 | 0.133876829 | 0.302372657 |
| ENSGALG00010011383 | 0.862011997 | 0.322690071 |
| ENSGALG00010011384 | 0.026237502 | 0.326247416 |
| ENSGALG00010011385 | 0.248800348 | 0.340410378 |
| ENSGALG00010011386 | 0.927931125 | 0.264113577 |
| ENSGALG00010011387 | 0.6720406   | 0.164584777 |
| ENSGALG00010011388 | 0.489972394 | 0.103067123 |
| ENSGALG00010011389 | 0.528188102 | 0.173938649 |
| ENSGALG00010011390 | 0.505826993 | 0.281626193 |
| ENSGALG00010011391 | 0.180447557 | 0.247826354 |
| ENSGALG00010011392 | 0.970097372 | 0.307465939 |
| ENSGALG00010011394 | 0.991950945 | 0.374175533 |
| ENSGALG00010011395 | 0.026681103 | 0.120260695 |
| ENSGALG00010011396 | 0.02903322  | 0.143948599 |
| ENSGALG00010011398 | 0.602363793 | 0.154391241 |
| ENSGALG00010011399 | 0.806161077 | 0.366077809 |
| ENSGALG00010011400 | 0.977574227 | 0.403479292 |
| ENSGALG00010011401 | 0.605793013 | 0.141949771 |
| ENSGALG00010011403 | 0.365421542 | 0.060491169 |
| ENSGALG00010011406 | 0.981694795 | 0.325299246 |
| ENSGALG00010011407 | 0.737167105 | 0.30749975  |
| ENSGALG00010011410 | 0.098374077 | 0.086174569 |
| ENSGALG00010011411 | 0.062572455 | 0.372325902 |
| ENSGALG00010011412 | 0.717582607 | 0.484979213 |
| ENSGALG00010011413 | 0.455617277 | 0.202988794 |
| ENSGALG00010011414 | 0.212489801 | 0.044241246 |
| ENSGALG00010011415 | 0.264239718 | 0.073427965 |
| ENSGALG00010011416 | 0.238275933 | 0.304119854 |
| ENSGALG00010011417 | 0.881641227 | 0.266689249 |
| ENSGALG00010011418 | 0.938985144 | 0.401802042 |
| ENSGALG00010011419 | 0.910391148 | 0.27669541  |
| ENSGALG00010011420 | 0.532986199 | 0.018525502 |
| ENSGALG00010011421 | 0.787900642 | 0.36380624  |
| ENSGALG00010011422 | 0.278329322 | 0.179272119 |

|                    |             |             |
|--------------------|-------------|-------------|
| ENSGALG00010011423 | 0.518479945 | 0.217771866 |
| ENSGALG00010011424 | 0.937000683 | 0.249455383 |
| ENSGALG00010011425 | 0.913794677 | 0.223919023 |
| ENSGALG00010011426 | 0.366309794 | 0.065469425 |
| ENSGALG00010011427 | 0.665376654 | 0.185626694 |
| ENSGALG00010011428 | 0.855421164 | 0.333158994 |
| ENSGALG00010011429 | 0.954314467 | 0.335860546 |
| ENSGALG00010011430 | 0.02372619  | 0.01699834  |
| ENSGALG00010011431 | 0.96371613  | 0.329202155 |
| ENSGALG00010011432 | 0.254396306 | 0.393023371 |
| ENSGALG00010011433 | 0.666652606 | 0.325341182 |
| ENSGALG00010011434 | 0.972113074 | 0.400130837 |
| ENSGALG00010011436 | 0.002137418 | 0.308333474 |
| ENSGALG00010011437 | 0.414225449 | 0.170909261 |
| ENSGALG00010011438 | 0.803556069 | 0.353195011 |
| ENSGALG00010011439 | 0.292751436 | 0.222813632 |
| ENSGALG00010011440 | 0.983405558 | 0.353712756 |
| ENSGALG00010011441 | 0.953605026 | 0.351447811 |
| ENSGALG00010011443 | 0.055972588 | 0.210561539 |
| ENSGALG00010011444 | 0.208550923 | 0.676301294 |
| ENSGALG00010011445 | 0.700072203 | 0.080657532 |
| ENSGALG00010011446 | 0.222329967 | 0.148016346 |
| ENSGALG00010011447 | 0.852246332 | 0.516831648 |
| ENSGALG00010011448 | 0.995229035 | 0.333780318 |
| ENSGALG00010011449 | 0.990628554 | 0.320354941 |
| ENSGALG00010011450 | 0.948050842 | 0.378426828 |
| ENSGALG00010011452 | 0.841795203 | 0.165952907 |
| ENSGALG00010011453 | 0.863109897 | 0.287067338 |
| ENSGALG00010011454 | 0.957420049 | 0.331376719 |
| ENSGALG00010011455 | 0.995961471 | 0.335620201 |
| ENSGALG00010011456 | 0.892822679 | 0.099138465 |
| ENSGALG00010011457 | 0.623647925 | 0.338635305 |
| ENSGALG00010011458 | 0.817847501 | 0.277402001 |
| ENSGALG00010011459 | 0.266418373 | 0.070408048 |
| ENSGALG00010011460 | 0.715974756 | 0.228179698 |
| ENSGALG00010011461 | 0.951946241 | 0.39281477  |
| ENSGALG00010011462 | 0.934714225 | 0.346610454 |
| ENSGALG00010011463 | 0.938945082 | 0.305408938 |
| ENSGALG00010011464 | 0.4702125   | 0.112418143 |
| ENSGALG00010011465 | 0.855145738 | 0.388854297 |
| ENSGALG00010011466 | 0.870159566 | 0.213001879 |
| ENSGALG00010011468 | 0.658709788 | 0.340967446 |
| ENSGALG00010011469 | 0.519537205 | 0.21164544  |
| ENSGALG00010011470 | 0.076718666 | 0.300404048 |
| ENSGALG00010011471 | 0.585406596 | 0.469027993 |
| ENSGALG00010011473 | 0.747000364 | 0.219771237 |
| ENSGALG00010011474 | 0.575833754 | 0.231040825 |
| ENSGALG00010011475 | 0.363651178 | 0.082143312 |
| ENSGALG00010011477 | 0.977915062 | 0.312666893 |
| ENSGALG00010011478 | 0.62446273  | 0.41799487  |
| ENSGALG00010011480 | 0.72996601  | 0.242562651 |
| ENSGALG00010011481 | 0.04665175  | 0.059060748 |
| ENSGALG00010011482 | 0.975103457 | 0.426537516 |
| ENSGALG00010011484 | 0.821566056 | 0.374089855 |
| ENSGALG00010011485 | 0.872853022 | 0.152588525 |
| ENSGALG00010011486 | 0.342424858 | 0.319091317 |

|                    |             |             |
|--------------------|-------------|-------------|
| ENSGALG00010011487 | 0.94803608  | 0.476475409 |
| ENSGALG00010011491 | 0.264239718 | 0.073427965 |
| ENSGALG00010011494 | 0.39155441  | 0.07460765  |
| ENSGALG00010011496 | 0.745122609 | 0.517239823 |
| ENSGALG00010011497 | 0.867602233 | 0.067982848 |
| ENSGALG00010011498 | 0.812203624 | 0.124746846 |
| ENSGALG00010011499 | 0.836536682 | 0.311889049 |
| ENSGALG00010011500 | 0.154454077 | 0.244544221 |
| ENSGALG00010011501 | 0.503967172 | 0.055172762 |
| ENSGALG00010011502 | 0.729633653 | 0.234589189 |
| ENSGALG00010011503 | 0.916521836 | 0.438682822 |
| ENSGALG00010011504 | 0.667227149 | 0.482843876 |
| ENSGALG00010011505 | 0.982118831 | 0.329000487 |
| ENSGALG00010011507 | 0.027569167 | 0.176120446 |
| ENSGALG00010011508 | 0.39155441  | 0.07460765  |
| ENSGALG00010011509 | 0.078237959 | 0.360530349 |
| ENSGALG00010011511 | 0.955008608 | 0.345273669 |
| ENSGALG00010011514 | 0.39144912  | 0.115895902 |
| ENSGALG00010011515 | 0.917782477 | 0.316880719 |
| ENSGALG00010011520 | 0.749193947 | 0.254850138 |
| ENSGALG00010011522 | 0.264747167 | 0.042883696 |
| ENSGALG00010011523 | 0.560861721 | 0.041618508 |
| ENSGALG00010011525 | 0.742762347 | 0.346398279 |
| ENSGALG00010011526 | 0.584104383 | 0.219706795 |
| ENSGALG00010011529 | 0.805602287 | 0.331605615 |
| ENSGALG00010011530 | 0.970955743 | 0.230957624 |
| ENSGALG00010011531 | 0.950083128 | 0.23009068  |
| ENSGALG00010011533 | 0.854749397 | 0.083860235 |
| ENSGALG00010011536 | 0.935727299 | 0.27357892  |
| ENSGALG00010011538 | 0.718789258 | 0.077641061 |
| ENSGALG00010011539 | 0.949247165 | 0.331968404 |
| ENSGALG00010011544 | 0.93277678  | 0.275874598 |
| ENSGALG00010011545 | 0.97475756  | 0.377679897 |
| ENSGALG00010011546 | 0.661730417 | 0.045885929 |
| ENSGALG00010011548 | 0.735187976 | 0.323119759 |
| ENSGALG00010011549 | 0.803181436 | 0.374633305 |
| ENSGALG00010011551 | 0.963787487 | 0.313881511 |
| ENSGALG00010011552 | 0.367278486 | 0.580935072 |
| ENSGALG00010011553 | 0.692826429 | 0.282077751 |
| ENSGALG00010011554 | 0.736769851 | 0.189034053 |
| ENSGALG00010011556 | 0.231333391 | 0.151628886 |
| ENSGALG00010011558 | 0.96997016  | 0.248447038 |
| ENSGALG00010011559 | 0.938163341 | 0.417696586 |
| ENSGALG00010011560 | 0.875816189 | 0.403950133 |
| ENSGALG00010011561 | 0.906376964 | 0.240094544 |
| ENSGALG00010011563 | 0.954654216 | 0.307824037 |
| ENSGALG00010011564 | 0.657364544 | 0.417821904 |
| ENSGALG00010011565 | 0.958221882 | 0.308707203 |
| ENSGALG00010011566 | 0.994823087 | 0.339407562 |
| ENSGALG00010011567 | 0.745447002 | 0.299116844 |
| ENSGALG00010011568 | 0.230134203 | 0.172217715 |
| ENSGALG00010011570 | 0.887025618 | 0.081031623 |
| ENSGALG00010011571 | 0.773352238 | 0.122553173 |
| ENSGALG00010011572 | 0.945286098 | 0.330600157 |
| ENSGALG00010011573 | 0.288021143 | 0.332904484 |
| ENSGALG00010011574 | 0.709754066 | 0.030166308 |

|                    |             |             |
|--------------------|-------------|-------------|
| ENSGALG00010011575 | 0.359043838 | 0.185207052 |
| ENSGALG00010011576 | 0.177586498 | 0.09313515  |
| ENSGALG00010011578 | 0.972748762 | 0.33562868  |
| ENSGALG00010011579 | 0.539238239 | 0.058714089 |
| ENSGALG00010011580 | 0.153179575 | 0.186651527 |
| ENSGALG00010011581 | 0.004425675 | 0.43769974  |
| ENSGALG00010011582 | 0.912903905 | 0.419624694 |
| ENSGALG00010011586 | 0.736624659 | 0.007141803 |
| ENSGALG00010011587 | 0.740796892 | 0.365872899 |
| ENSGALG00010011588 | 0.898399519 | 0.182054992 |
| ENSGALG00010011589 | 0.283858919 | 0.533375093 |
| ENSGALG00010011590 | 0.581925546 | 0.005661406 |
| ENSGALG00010011592 | 0.820105071 | 0.281256104 |
| ENSGALG00010011593 | 0.922903004 | 0.2200487   |
| ENSGALG00010011594 | 0.085654925 | 0.205522587 |
| ENSGALG00010011595 | 0.075107975 | 0.094783114 |
| ENSGALG00010011596 | 0.325327998 | 0.037399662 |
| ENSGALG00010011597 | 0.995184444 | 0.336952506 |
| ENSGALG00010011598 | 0.386764803 | 0.105517621 |
| ENSGALG00010011601 | 0.51666588  | 0.034977854 |
| ENSGALG00010011603 | 0.480552967 | 0.204744011 |
| ENSGALG00010011605 | 0.985101689 | 0.343622058 |
| ENSGALG00010011607 | 0.944075895 | 0.38308238  |
| ENSGALG00010011609 | 0.985195857 | 0.330501614 |
| ENSGALG00010011612 | 0.515530475 | 0.121206583 |
| ENSGALG00010011613 | 0.285272007 | 0.109169955 |
| ENSGALG00010011615 | 0.3619239   | 0.131870846 |
| ENSGALG00010011616 | 0.784503462 | 0.362232699 |
| ENSGALG00010011617 | 0.372332139 | 0.051846001 |
| ENSGALG00010011619 | 0.974307243 | 0.319170192 |
| ENSGALG00010011620 | 0.044919115 | 0.152705647 |
| ENSGALG00010011621 | 0.845837819 | 0.167546509 |
| ENSGALG00010011622 | 0.953160088 | 0.346765414 |
| ENSGALG00010011625 | 0.975214302 | 0.337895991 |
| ENSGALG00010011626 | 0.90762228  | 0.492018246 |
| ENSGALG00010011627 | 0.401639624 | 0.101384476 |
| ENSGALG00010011628 | 0.952642187 | 0.456350232 |
| ENSGALG00010011629 | 0.767684733 | 0.231319694 |
| ENSGALG00010011630 | 0.501545021 | 0.148613615 |
| ENSGALG00010011633 | 0.475692575 | 0.108802559 |
| ENSGALG00010011634 | 0.1484139   | 0.033754126 |
| ENSGALG00010011635 | 0.560424703 | 0.142578772 |
| ENSGALG00010011636 | 0.960401906 | 0.255353807 |
| ENSGALG00010011637 | 0.882158467 | 0.239675088 |
| ENSGALG00010011638 | 0.313656284 | 0.17886592  |
| ENSGALG00010011639 | 0.368476583 | 0.099553507 |
| ENSGALG00010011640 | 0.375927362 | 0.072713138 |
| ENSGALG00010011641 | 0.128105416 | 0.123478558 |
| ENSGALG00010011643 | 0.989387432 | 0.287617609 |
| ENSGALG00010011644 | 0.367689286 | 0.134680195 |
| ENSGALG00010011646 | 0.264239718 | 0.073427965 |
| ENSGALG00010011647 | 0.103206346 | 0.309872442 |
| ENSGALG00010011648 | 0.925024779 | 0.333894983 |
| ENSGALG00010011649 | 0.54468247  | 0.063484501 |
| ENSGALG00010011650 | 0.913329691 | 0.288362466 |
| ENSGALG00010011651 | 0.151164128 | 0.165318892 |

|                    |             |             |
|--------------------|-------------|-------------|
| ENSGALG00010011652 | 0.862039205 | 0.289394475 |
| ENSGALG00010011653 | 0.906980664 | 0.387029802 |
| ENSGALG00010011655 | 0.56644393  | 0.254312451 |
| ENSGALG00010011657 | 0.980429735 | 0.27375894  |
| ENSGALG00010011658 | 0.264082519 | 0.307815413 |
| ENSGALG00010011659 | 0.849397349 | 0.147504273 |
| ENSGALG00010011660 | 0.89947965  | 0.155295863 |
| ENSGALG00010011661 | 0.828608245 | 0.285084371 |
| ENSGALG00010011662 | 0.98336613  | 0.299413741 |
| ENSGALG00010011663 | 0.376087585 | 0.210661075 |
| ENSGALG00010011664 | 0.97718249  | 0.357300684 |
| ENSGALG00010011667 | 0.264239718 | 0.073427965 |
| ENSGALG00010011668 | 0.994583102 | 0.338966243 |
| ENSGALG00010011669 | 0.302724629 | 0.96934886  |
| ENSGALG00010011670 | 0.891165426 | 0.399865049 |
| ENSGALG00010011671 | 0.982846522 | 0.287261285 |
| ENSGALG00010011673 | 0.809115913 | 0.357220904 |
| ENSGALG00010011674 | 0.867861056 | 0.448701207 |
| ENSGALG00010011677 | 0.940155955 | 0.20773105  |
| ENSGALG00010011680 | 0.448858621 | 0.208430775 |
| ENSGALG00010011681 | 0.692782425 | 0.308070692 |
| ENSGALG00010011682 | 0.953991271 | 0.195759296 |
| ENSGALG00010011683 | 0.423373618 | 0.185270871 |
| ENSGALG00010011685 | 0.964680589 | 0.323338585 |
| ENSGALG00010011686 | 0.38480368  | 0.180523942 |
| ENSGALG00010011688 | 0.375672498 | 0.060345555 |
| ENSGALG00010011689 | 0.819581612 | 0.075713902 |
| ENSGALG00010011691 | 0.399949686 | 0.216676978 |
| ENSGALG00010011692 | 0.960666387 | 0.293543243 |
| ENSGALG00010011695 | 0.223609937 | 0.312393154 |
| ENSGALG00010011696 | 0.958260537 | 0.383033183 |
| ENSGALG00010011699 | 0.911686283 | 0.138142869 |
| ENSGALG00010011701 | 0.561015022 | 0.566552327 |
| ENSGALG00010011702 | 0.318335977 | 0.238374845 |
| ENSGALG00010011703 | 0.909201511 | 0.231432473 |
| ENSGALG00010011705 | 0.451833186 | 0.212831663 |
| ENSGALG00010011706 | 0.609259914 | 0.178414241 |
| ENSGALG00010011707 | 0.765645754 | 0.302647548 |
| ENSGALG00010011708 | 0.940543353 | 0.357770605 |
| ENSGALG00010011710 | 0.867398957 | 0.531284217 |
| ENSGALG00010011712 | 0.571504144 | 0.426932381 |
| ENSGALG00010011713 | 0.601149828 | 0.278271277 |
| ENSGALG00010011714 | 0.483410608 | 0.182168852 |
| ENSGALG00010011715 | 0.997075595 | 0.337640176 |
| ENSGALG00010011716 | 0.654167806 | 0.193457175 |
| ENSGALG00010011720 | 0.687949682 | 0.208949982 |
| ENSGALG00010011722 | 0.648679614 | 0.049441986 |
| ENSGALG00010011723 | 0.681242389 | 0.354803105 |
| ENSGALG00010011724 | 0.869022311 | 0.192744453 |
| ENSGALG00010011726 | 0.531598818 | 0.129803326 |
| ENSGALG00010011729 | 0.499690341 | 0.416471465 |
| ENSGALG00010011734 | 0.618088514 | 0.186097831 |
| ENSGALG00010011735 | 0.394320708 | 0.213793726 |
| ENSGALG00010011738 | 0.778162611 | 0.373658368 |
| ENSGALG00010011739 | 0.588746884 | 0.101505993 |
| ENSGALG00010011740 | 0.603848307 | 0.440375365 |

|                    |             |             |
|--------------------|-------------|-------------|
| ENSGALG00010011741 | 0.443859172 | 0.063996169 |
| ENSGALG00010011742 | 0.876603303 | 0.242752787 |
| ENSGALG00010011743 | 0.483711062 | 0.189371251 |
| ENSGALG00010011744 | 0.579375556 | 0.15826361  |
| ENSGALG00010011745 | 0.290159775 | 0.107663777 |
| ENSGALG00010011746 | 0.887502068 | 0.339804595 |
| ENSGALG00010011747 | 0.863204776 | 0.27649403  |
| ENSGALG00010011748 | 0.971556108 | 0.312547108 |
| ENSGALG00010011749 | 0.15230793  | 0.205138772 |
| ENSGALG00010011750 | 0.474924759 | 0.108796887 |
| ENSGALG00010011751 | 0.944057625 | 0.178526242 |
| ENSGALG00010011752 | 0.099392904 | 0.353257386 |
| ENSGALG00010011753 | 0.796249424 | 0.286732751 |
| ENSGALG00010011754 | 0.552034619 | 0.191219759 |
| ENSGALG00010011755 | 0.486638466 | 0.067679636 |
| ENSGALG00010011757 | 0.472800605 | 0.103933459 |
| ENSGALG00010011758 | 0.911200277 | 0.477828338 |
| ENSGALG00010011759 | 0.461722673 | 0.0511847   |
| ENSGALG00010011760 | 0.270406625 | 0.256214966 |
| ENSGALG00010011764 | 0.674403459 | 0.224933011 |
| ENSGALG00010011765 | 0.49558281  | 0.163180225 |
| ENSGALG00010011766 | 0.064062843 | 0.117847258 |
| ENSGALG00010011767 | 0.949230122 | 0.350487534 |
| ENSGALG00010011770 | 0.928644633 | 0.227810661 |
| ENSGALG00010011771 | 0.989420402 | 0.379561383 |
| ENSGALG00010011772 | 0.737251832 | 0.336799036 |
| ENSGALG00010011774 | 0.361335709 | 0.133815935 |
| ENSGALG00010011775 | 0.503013931 | 0.25010058  |
| ENSGALG00010011776 | 0.93437749  | 0.214419472 |
| ENSGALG00010011777 | 0.837837169 | 0.293638615 |
| ENSGALG00010011780 | 0.429951074 | 0.306496661 |
| ENSGALG00010011782 | 0.034060073 | 0.094660884 |
| ENSGALG00010011784 | 0.937342753 | 0.338718157 |
| ENSGALG00010011786 | 0.678963135 | 0.253454805 |
| ENSGALG00010011787 | 0.945037812 | 0.347951272 |
| ENSGALG00010011789 | 0.940464395 | 0.197282516 |
| ENSGALG00010011790 | 0.429490046 | 0.354890265 |
| ENSGALG00010011792 | 0.898102192 | 0.338904605 |
| ENSGALG00010011793 | 0.174561363 | 0.237002427 |
| ENSGALG00010011795 | 0.849185773 | 0.100916082 |
| ENSGALG00010011796 | 0.990741779 | 0.319426444 |
| ENSGALG00010011797 | 0.07938051  | 0.016256037 |
| ENSGALG00010011798 | 0.867683171 | 0.214129973 |
| ENSGALG00010011802 | 0.064495596 | 0.127968052 |
| ENSGALG00010011803 | 0.452417225 | 0.631318418 |
| ENSGALG00010011808 | 0.918197304 | 0.239908201 |
| ENSGALG00010011810 | 0.425884608 | 0.07018661  |
| ENSGALG00010011814 | 0.770786772 | 0.427895146 |
| ENSGALG00010011816 | 0.95468339  | 0.226694064 |
| ENSGALG00010011817 | 0.659371996 | 0.217381088 |
| ENSGALG00010011819 | 0.854327964 | 0.384400771 |
| ENSGALG00010011821 | 0.383041837 | 0.148092965 |
| ENSGALG00010011823 | 0.094263426 | 0.26522695  |
| ENSGALG00010011825 | 0.755904978 | 0.011627432 |
| ENSGALG00010011828 | 0.245700908 | 0.010899108 |
| ENSGALG00010011830 | 0.332738249 | 0.166829217 |



|                    |             |             |
|--------------------|-------------|-------------|
| ENSGALG00010011833 | 0.258407206 | 0.372577979 |
| ENSGALG00010011834 | 0.266137114 | 0.107784983 |
| ENSGALG00010011836 | 0.329463224 | 0.169694316 |
| ENSGALG00010011837 | 0.904634287 | 0.29891858  |
| ENSGALG00010011839 | 0.960161889 | 0.28633474  |
| ENSGALG00010011840 | 0.580850905 | 0.270864958 |
| ENSGALG00010011841 | 0.669848214 | 0.163837991 |
| ENSGALG00010011843 | 0.760267004 | 0.42423808  |
| ENSGALG00010011846 | 0.957826504 | 0.326297962 |
| ENSGALG00010011850 | 0.334544584 | 0.022218866 |
| ENSGALG00010011851 | 0.578839053 | 0.057038895 |
| ENSGALG00010011853 | 0.986864288 | 0.353479068 |
| ENSGALG00010011855 | 0.565170855 | 0.269738805 |
| ENSGALG00010011856 | 0.499512398 | 0.099639666 |
| ENSGALG00010011859 | 0.831402908 | 0.425401911 |
| ENSGALG00010011860 | 0.706053538 | 0.243684049 |
| ENSGALG00010011861 | 0.989585521 | 0.334267443 |
| ENSGALG00010011864 | 0.884033578 | 0.373363226 |
| ENSGALG00010011866 | 0.975796372 | 0.32112176  |
| ENSGALG00010011867 | 0.17174986  | 0.08911126  |
| ENSGALG00010011868 | 0.792445005 | 0.231908087 |
| ENSGALG00010011870 | 0.736283991 | 0.209448625 |
| ENSGALG00010011871 | 0.618237815 | 0.19579431  |
| ENSGALG00010011872 | 0.57014937  | 0.217917445 |
| ENSGALG00010011873 | 0.816559963 | 0.225059368 |
| ENSGALG00010011874 | 0.291723759 | 0.342962866 |
| ENSGALG00010011875 | 0.740570057 | 0.226810127 |
| ENSGALG00010011876 | 0.987907908 | 0.321303494 |
| ENSGALG00010011879 | 0.99319153  | 0.357715374 |
| ENSGALG00010011880 | 0.708196373 | 0.035926503 |
| ENSGALG00010011881 | 0.68335939  | 0.420511293 |
| ENSGALG00010011883 | 0.074112911 | 0.220367631 |
| ENSGALG00010011884 | 0.52969404  | 0.146627906 |
| ENSGALG00010011885 | 0.961915024 | 0.167982694 |
| ENSGALG00010011886 | 0.889742885 | 0.481910104 |
| ENSGALG00010011887 | 0.986801942 | 0.309351941 |
| ENSGALG00010011888 | 0.97657261  | 0.295322631 |
| ENSGALG00010011889 | 0.007203266 | 0.48972541  |
| ENSGALG00010011890 | 0.666271935 | 0.192961624 |
| ENSGALG00010011891 | 0.989092815 | 0.270783935 |
| ENSGALG00010011893 | 0.881251278 | 0.329922449 |
| ENSGALG00010011894 | 0.174800004 | 0.038959758 |
| ENSGALG00010011895 | 0.091627886 | 0.220538455 |
| ENSGALG00010011896 | 0.695347517 | 0.3167596   |
| ENSGALG00010011898 | 0.980427911 | 0.319931597 |
| ENSGALG00010011899 | 0.982537146 | 0.277652721 |
| ENSGALG00010011901 | 0.262944547 | 0.194104897 |
| ENSGALG00010011902 | 0.833842246 | 0.400876325 |
| ENSGALG00010011903 | 0.918503866 | 0.31517555  |
| ENSGALG00010011904 | 0.341252174 | 0.242639671 |
| ENSGALG00010011905 | 0.455389738 | 0.15089549  |
| ENSGALG00010011907 | 0.82887286  | 0.131152285 |
| ENSGALG00010011908 | 0.620862875 | 0.283114556 |
| ENSGALG00010011909 | 0.327705463 | 0.244891426 |
| ENSGALG00010011911 | 0.656720654 | 0.620875816 |
| ENSGALG00010011912 | 0.525251759 | 0.278129137 |

|                    |             |             |
|--------------------|-------------|-------------|
| ENSGALG00010011913 | 0.89456888  | 0.14488699  |
| ENSGALG00010011914 | 0.2878541   | 0.085532585 |
| ENSGALG00010011915 | 0.933732401 | 0.278660177 |
| ENSGALG00010011916 | 0.442190906 | 0.358404691 |
| ENSGALG00010011917 | 0.915999119 | 0.231855288 |
| ENSGALG00010011918 | 0.31274393  | 0.056873263 |
| ENSGALG00010011920 | 0.266137114 | 0.107784983 |
| ENSGALG00010011921 | 0.993736945 | 0.344316825 |
| ENSGALG00010011922 | 0.619537866 | 0.369467628 |
| ENSGALG00010011923 | 0.727093087 | 0.301508952 |
| ENSGALG00010011924 | 0.99377825  | 0.338508975 |
| ENSGALG00010011925 | 0.588072892 | 0.357279496 |
| ENSGALG00010011926 | 0.971441913 | 0.301947673 |
| ENSGALG00010011927 | 0.913839681 | 0.375649536 |
| ENSGALG00010011929 | 0.713631056 | 0.013620675 |
| ENSGALG00010011930 | 0.855102839 | 0.141705898 |
| ENSGALG00010011931 | 0.324470909 | 0.107018782 |
| ENSGALG00010011932 | 0.981360163 | 0.381285972 |
| ENSGALG00010011933 | 0.930521308 | 0.309319476 |
| ENSGALG00010011934 | 0.247217504 | 0.210085781 |
| ENSGALG00010011935 | 0.939921489 | 0.238762361 |
| ENSGALG00010011936 | 0.611794619 | 0.019144574 |
| ENSGALG00010011937 | 0.90573596  | 0.141259132 |
| ENSGALG00010011938 | 0.170568071 | 0.886028531 |
| ENSGALG00010011939 | 0.637892194 | 0.195401662 |
| ENSGALG00010011941 | 0.945016225 | 0.23524561  |
| ENSGALG00010011943 | 0.610363861 | 0.260221111 |
| ENSGALG00010011944 | 0.950950936 | 0.137173984 |
| ENSGALG00010011946 | 0.013905876 | 0.50828939  |
| ENSGALG00010011947 | 0.954877159 | 0.285806587 |
| ENSGALG00010011949 | 0.977628021 | 0.312237441 |
| ENSGALG00010011950 | 0.985941029 | 0.334834001 |
| ENSGALG00010011952 | 0.964674673 | 0.262786103 |
| ENSGALG00010011953 | 0.42320212  | 0.045574073 |
| ENSGALG00010011954 | 0.397287082 | 0.408721044 |
| ENSGALG00010011957 | 0.9835734   | 0.309379608 |
| ENSGALG00010011960 | 0.326428945 | 0.159254363 |
| ENSGALG00010011961 | 0.950096011 | 0.383201963 |
| ENSGALG00010011962 | 0.651432162 | 0.528785039 |
| ENSGALG00010011963 | 0.931098837 | 0.241747607 |
| ENSGALG00010011965 | 0.978199116 | 0.312508673 |
| ENSGALG00010011966 | 0.593884663 | 0.049358268 |
| ENSGALG00010011967 | 0.975570719 | 0.307075316 |
| ENSGALG00010011968 | 0.934560417 | 0.315794939 |
| ENSGALG00010011969 | 0.31380035  | 0.209059525 |
| ENSGALG00010011971 | 0.46662339  | 0.0118048   |
| ENSGALG00010011972 | 0.845426412 | 0.383640891 |
| ENSGALG00010011973 | 0.95174429  | 0.453424844 |
| ENSGALG00010011976 | 0.934472544 | 0.286581101 |
| ENSGALG00010011977 | 0.949552501 | 0.250159871 |
| ENSGALG00010011979 | 0.949173268 | 0.287006315 |
| ENSGALG00010011980 | 0.995159797 | 0.335262489 |
| ENSGALG00010011981 | 0.503351778 | 0.057829877 |
| ENSGALG00010011982 | 0.95724726  | 0.207335472 |
| ENSGALG00010011983 | 0.815281931 | 0.231449266 |
| ENSGALG00010011984 | 0.914563452 | 0.189523645 |

|                    |             |             |
|--------------------|-------------|-------------|
| ENSGALG00010011985 | 0.904456307 | 0.399371993 |
| ENSGALG00010011987 | 0.923077087 | 0.207368346 |
| ENSGALG00010011989 | 0.950598452 | 0.334017361 |
| ENSGALG00010011991 | 0.736667596 | 0.060889772 |
| ENSGALG00010011992 | 0.18883989  | 0.179765984 |
| ENSGALG00010011993 | 0.960083837 | 0.288483659 |
| ENSGALG00010011994 | 0.993373096 | 0.3355929   |
| ENSGALG00010011996 | 0.890319642 | 0.239736064 |
| ENSGALG00010011997 | 0.968362448 | 0.303690476 |
| ENSGALG00010011998 | 0.850748023 | 0.293871339 |
| ENSGALG00010012000 | 0.188292245 | 0.218406976 |
| ENSGALG00010012001 | 0.255147627 | 0.000222436 |
| ENSGALG00010012004 | 0.691352587 | 0.491785273 |
| ENSGALG00010012007 | 0.20322517  | 0.162383673 |
| ENSGALG00010012008 | 0.781506443 | 0.191133714 |
| ENSGALG00010012010 | 0.517133108 | 0.019748633 |
| ENSGALG00010012011 | 0.966339599 | 0.307510396 |
| ENSGALG00010012012 | 0.277566769 | 0.107857127 |
| ENSGALG00010012013 | 0.187514554 | 0.108479243 |
| ENSGALG00010012015 | 0.319595365 | 0.129731762 |
| ENSGALG00010012016 | 0.890787488 | 0.322206434 |
| ENSGALG00010012017 | 0.796112282 | 0.309359231 |
| ENSGALG00010012018 | 0.722336407 | 0.263574938 |
| ENSGALG00010012019 | 0.983119706 | 0.322213935 |
| ENSGALG00010012021 | 0.146592976 | 0.139930559 |
| ENSGALG00010012022 | 0.244156167 | 0.153802059 |
| ENSGALG00010012023 | 0.109443317 | 0.180132757 |
| ENSGALG00010012024 | 0.459443939 | 0.34820086  |
| ENSGALG00010012025 | 0.345248143 | 0.071509017 |
| ENSGALG00010012026 | 0.112680991 | 0.204969795 |
| ENSGALG00010012027 | 0.621562527 | 0.266502984 |
| ENSGALG00010012028 | 0.510563674 | 0.122437857 |
| ENSGALG00010012031 | 0.923203342 | 0.151832843 |
| ENSGALG00010012032 | 0.971730812 | 0.290713268 |
| ENSGALG00010012034 | 0.454965387 | 0.380086403 |
| ENSGALG00010012035 | 0.061265043 | 0.137399214 |
| ENSGALG00010012039 | 0.277566769 | 0.107857127 |
| ENSGALG00010012040 | 0.721868544 | 0.214148708 |
| ENSGALG00010012041 | 0.943586723 | 0.356991404 |
| ENSGALG00010012042 | 0.839153021 | 0.246049954 |
| ENSGALG00010012043 | 0.925644013 | 0.307923856 |
| ENSGALG00010012044 | 0.584253952 | 0.232013386 |
| ENSGALG00010012045 | 0.779722243 | 0.300717674 |
| ENSGALG00010012046 | 0.813114291 | 0.376133263 |
| ENSGALG00010012047 | 0.900435439 | 0.252548293 |
| ENSGALG00010012048 | 0.431650221 | 0.394914953 |
| ENSGALG00010012049 | 0.982863374 | 0.285703693 |
| ENSGALG00010012051 | 0.273602451 | 0.568861216 |
| ENSGALG00010012052 | 0.888799149 | 0.227788264 |
| ENSGALG00010012053 | 0.687600894 | 0.048071332 |
| ENSGALG00010012054 | 0.841388017 | 0.209259085 |
| ENSGALG00010012055 | 0.821285067 | 0.188500103 |
| ENSGALG00010012056 | 0.779676548 | 0.226805181 |
| ENSGALG00010012058 | 0.372266996 | 0.37524055  |
| ENSGALG00010012059 | 0.448112668 | 0.024750603 |
| ENSGALG00010012060 | 0.987176451 | 0.297577412 |

|                    |             |             |
|--------------------|-------------|-------------|
| ENSGALG00010012061 | 0.420759023 | 0.11967094  |
| ENSGALG00010012062 | 0.030894139 | 0.178830973 |
| ENSGALG00010012063 | 0.801100814 | 0.356654301 |
| ENSGALG00010012064 | 0.770559589 | 0.06803018  |
| ENSGALG00010012065 | 0.388181886 | 0.168275567 |
| ENSGALG00010012066 | 0.991999008 | 0.370590736 |
| ENSGALG00010012067 | 0.068506004 | 0.161511152 |
| ENSGALG00010012068 | 0.05197934  | 0.14495833  |
| ENSGALG00010012069 | 0.34081212  | 0.34730063  |
| ENSGALG00010012070 | 0.201115968 | 0.31178457  |
| ENSGALG00010012071 | 0.88689419  | 0.360104101 |
| ENSGALG00010012072 | 0.954775546 | 0.418169704 |
| ENSGALG00010012073 | 0.378770564 | 0.079283839 |
| ENSGALG00010012074 | 0.935296588 | 0.249497986 |
| ENSGALG00010012075 | 0.922682791 | 0.224820846 |
| ENSGALG00010012076 | 0.325119108 | 0.20125316  |
| ENSGALG00010012077 | 0.49605383  | 0.278749403 |
| ENSGALG00010012078 | 0.804971557 | 0.278791065 |
| ENSGALG00010012079 | 0.208116023 | 0.197338301 |
| ENSGALG00010012080 | 0.163503711 | 0.101124089 |
| ENSGALG00010012081 | 0.96115913  | 0.362722216 |
| ENSGALG00010012082 | 0.623811183 | 0.421344119 |
| ENSGALG00010012083 | 0.880000157 | 0.470814313 |
| ENSGALG00010012084 | 0.969626111 | 0.266558966 |
| ENSGALG00010012085 | 0.844192549 | 0.164257773 |
| ENSGALG00010012086 | 0.434480888 | 0.64786167  |
| ENSGALG00010012087 | 0.841677995 | 0.312116955 |
| ENSGALG00010012088 | 0.737477467 | 0.367641895 |
| ENSGALG00010012089 | 0.846798434 | 0.232122906 |
| ENSGALG00010012090 | 0.936448028 | 0.356960054 |
| ENSGALG00010012091 | 0.832135822 | 0.239102661 |
| ENSGALG00010012092 | 0.049100097 | 0.306127958 |
| ENSGALG00010012093 | 0.603564165 | 0.346718638 |
| ENSGALG00010012094 | 0.290206454 | 0.07030665  |
| ENSGALG00010012095 | 0.74555247  | 0.245732387 |
| ENSGALG00010012096 | 0.936907578 | 0.223852324 |
| ENSGALG00010012097 | 0.972205171 | 0.28617498  |
| ENSGALG00010012098 | 0.144950617 | 0.223270414 |
| ENSGALG00010012099 | 0.271944098 | 0.328468861 |
| ENSGALG00010012100 | 0.985982323 | 0.32196462  |
| ENSGALG00010012101 | 0.879458645 | 0.255637781 |
| ENSGALG00010012102 | 0.096479429 | 0.317155548 |
| ENSGALG00010012103 | 0.980024551 | 0.345109188 |
| ENSGALG00010012105 | 0.668928366 | 0.435759193 |
| ENSGALG00010012106 | 0.257084704 | 0.076724426 |
| ENSGALG00010012107 | 0.608833794 | 0.490123655 |
| ENSGALG00010012108 | 0.952914751 | 0.4059308   |
| ENSGALG00010012110 | 0.989471616 | 0.37963336  |
| ENSGALG00010012111 | 0.964595258 | 0.425906034 |
| ENSGALG00010012112 | 0.951611737 | 0.31250283  |
| ENSGALG00010012113 | 0.086151952 | 0.024534691 |
| ENSGALG00010012114 | 0.98684992  | 0.386135468 |
| ENSGALG00010012115 | 0.158787776 | 0.092763717 |
| ENSGALG00010012116 | 0.967621033 | 0.19207874  |
| ENSGALG00010012118 | 0.422309209 | 0.141811214 |
| ENSGALG00010012119 | 0.940962094 | 0.410630933 |

|                    |             |             |
|--------------------|-------------|-------------|
| ENSGALG00010012120 | 0.98699645  | 0.312132157 |
| ENSGALG00010012121 | 0.848854534 | 0.225993065 |
| ENSGALG00010012122 | 0.884259416 | 0.379169606 |
| ENSGALG00010012123 | 0.729917612 | 0.314485819 |
| ENSGALG00010012124 | 0.911540131 | 0.288374391 |
| ENSGALG00010012125 | 0.769731312 | 0.113090665 |
| ENSGALG00010012127 | 0.755922822 | 0.290125774 |
| ENSGALG00010012128 | 0.491426386 | 0.646990655 |
| ENSGALG00010012129 | 0.347153445 | 0.151918687 |
| ENSGALG00010012130 | 0.109407067 | 0.065446484 |
| ENSGALG00010012131 | 0.92979051  | 0.258177122 |
| ENSGALG00010012133 | 0.77720716  | 0.136755704 |
| ENSGALG00010012135 | 0.939155853 | 0.351956634 |
| ENSGALG00010012136 | 0.599546708 | 0.02001782  |
| ENSGALG00010012138 | 0.87362878  | 0.578334227 |
| ENSGALG00010012140 | 0.714991007 | 0.313237339 |
| ENSGALG00010012141 | 0.410323842 | 0.138736863 |
| ENSGALG00010012142 | 0.683419221 | 0.292406822 |
| ENSGALG00010012143 | 0.17356806  | 0.179677741 |
| ENSGALG00010012144 | 0.910784534 | 0.278219283 |
| ENSGALG00010012145 | 0.86355224  | 0.319480195 |
| ENSGALG00010012147 | 0.973691443 | 0.340953937 |
| ENSGALG00010012148 | 0.436051612 | 0.144836033 |
| ENSGALG00010012149 | 0.929026616 | 0.328454134 |
| ENSGALG00010012150 | 0.28986868  | 0.272918563 |
| ENSGALG00010012151 | 0.500493317 | 0.166899124 |
| ENSGALG00010012153 | 0.33777847  | 0.133444889 |
| ENSGALG00010012154 | 0.574186831 | 0.415897645 |
| ENSGALG00010012155 | 0.075650671 | 0.188849599 |
| ENSGALG00010012156 | 0.583610171 | 0.185008823 |
| ENSGALG00010012157 | 0.811736126 | 0.150739253 |
| ENSGALG00010012158 | 0.034060073 | 0.094660884 |
| ENSGALG00010012159 | 0.321038788 | 0.006470839 |
| ENSGALG00010012160 | 0.36131855  | 0.079621968 |
| ENSGALG00010012161 | 0.77344179  | 0.10121447  |
| ENSGALG00010012162 | 0.267018706 | 0.028417775 |
| ENSGALG00010012163 | 0.949925036 | 0.295542423 |
| ENSGALG00010012164 | 0.264239718 | 0.073427965 |
| ENSGALG00010012165 | 0.085128486 | 0.232424904 |
| ENSGALG00010012166 | 0.715204142 | 0.286890639 |
| ENSGALG00010012167 | 0.749773862 | 0.238289763 |
| ENSGALG00010012168 | 0.368276332 | 0.248136926 |
| ENSGALG00010012169 | 0.71144714  | 0.298558914 |
| ENSGALG00010012171 | 0.996191249 | 0.33589749  |
| ENSGALG00010012172 | 0.669260657 | 0.295007515 |
| ENSGALG00010012173 | 0.014833316 | 0.547907885 |
| ENSGALG00010012174 | 0.201512115 | 0.188537209 |
| ENSGALG00010012175 | 0.988710067 | 0.344058402 |
| ENSGALG00010012176 | 0.219386918 | 0.079388121 |
| ENSGALG00010012177 | 0.755804957 | 0.336659918 |
| ENSGALG00010012179 | 0.869207028 | 0.179215259 |
| ENSGALG00010012180 | 0.656602307 | 0.031124264 |
| ENSGALG00010012181 | 0.324020854 | 0.340314887 |
| ENSGALG00010012182 | 0.870073325 | 0.368418056 |
| ENSGALG00010012184 | 0.262922434 | 0.138601464 |
| ENSGALG00010012186 | 0.959708321 | 0.290989836 |

|                    |             |             |
|--------------------|-------------|-------------|
| ENSGALG00010012187 | 0.072443378 | 0.463646656 |
| ENSGALG00010012188 | 0.700821337 | 0.200494281 |
| ENSGALG00010012190 | 0.924087996 | 0.330572837 |
| ENSGALG00010012191 | 0.98927153  | 0.309496276 |
| ENSGALG00010012193 | 0.081766613 | 0.217982134 |
| ENSGALG00010012194 | 0.564384142 | 0.171504076 |
| ENSGALG00010012195 | 0.496926336 | 0.001311978 |
| ENSGALG00010012196 | 0.104683574 | 0.172179805 |
| ENSGALG00010012198 | 0.91843905  | 0.233977203 |
| ENSGALG00010012199 | 0.290459155 | 0.052176187 |
| ENSGALG00010012200 | 0.713575889 | 0.242621794 |
| ENSGALG00010012202 | 0.119404885 | 0.095677849 |
| ENSGALG00010012203 | 0.196562959 | 0.140074262 |
| ENSGALG00010012205 | 0.797547215 | 0.256895358 |
| ENSGALG00010012207 | 0.855576472 | 0.103765284 |
| ENSGALG00010012208 | 0.716840183 | 0.348404724 |
| ENSGALG00010012209 | 0.656127957 | 0.235073357 |
| ENSGALG00010012210 | 0.255687341 | 0.370330683 |
| ENSGALG00010012212 | 0.369285984 | 0.322826047 |
| ENSGALG00010012213 | 0.754083844 | 0.502543717 |
| ENSGALG00010012215 | 0.95680393  | 0.400379247 |
| ENSGALG00010012216 | 0.120253183 | 0.187498856 |
| ENSGALG00010012217 | 0.207114972 | 0.167559281 |
| ENSGALG00010012218 | 0.012433676 | 0.134633327 |
| ENSGALG00010012219 | 0.278069753 | 0.224084059 |
| ENSGALG00010012224 | 0.376680122 | 0.171308365 |
| ENSGALG00010012225 | 0.687195335 | 0.055826735 |
| ENSGALG00010012226 | 0.509707519 | 0.329207768 |
| ENSGALG00010012227 | 0.931918612 | 0.324371058 |
| ENSGALG00010012228 | 0.599446594 | 0.11762545  |
| ENSGALG00010012229 | 0.958633615 | 0.204993087 |
| ENSGALG00010012230 | 0.494119398 | 0.071865626 |
| ENSGALG00010012232 | 0.454790157 | 0.150866466 |
| ENSGALG00010012233 | 0.264239718 | 0.073427965 |
| ENSGALG00010012234 | 0.917590592 | 0.302878933 |
| ENSGALG00010012235 | 0.907513172 | 0.282094238 |
| ENSGALG00010012236 | 0.067733698 | 0.1621315   |
| ENSGALG00010012237 | 0.669457956 | 0.182913933 |
| ENSGALG00010012239 | 0.741467983 | 0.354508977 |
| ENSGALG00010012240 | 0.889521265 | 0.322243263 |
| ENSGALG00010012241 | 0.799115159 | 0.308690215 |
| ENSGALG00010012242 | 0.073249016 | 0.149092301 |
| ENSGALG00010012243 | 0.227300086 | 0.179854268 |
| ENSGALG00010012244 | 0.957175565 | 0.269502689 |
| ENSGALG00010012245 | 0.907804889 | 0.421788022 |
| ENSGALG00010012246 | 0.617791301 | 0.292627085 |
| ENSGALG00010012247 | 0.762173238 | 0.130812431 |
| ENSGALG00010012248 | 0.903743359 | 0.360980448 |
| ENSGALG00010012250 | 0.55835516  | 0.433183788 |
| ENSGALG00010012252 | 0.456266076 | 0.096299349 |
| ENSGALG00010012253 | 0.998232705 | 0.342775793 |
| ENSGALG00010012258 | 0.50902694  | 0.470935475 |
| ENSGALG00010012259 | 0.761603363 | 0.242021246 |
| ENSGALG00010012260 | 0.534925549 | 0.072882227 |
| ENSGALG00010012262 | 0.571775559 | 0.205677313 |
| ENSGALG00010012263 | 0.737403879 | 0.040155689 |

|                    |             |             |
|--------------------|-------------|-------------|
| ENSGALG00010012264 | 0.996433873 | 0.367514846 |
| ENSGALG00010012266 | 0.463262327 | 0.091635488 |
| ENSGALG00010012268 | 0.38089863  | 0.141066523 |
| ENSGALG00010012271 | 0.690430351 | 0.283850997 |
| ENSGALG00010012274 | 0.954091836 | 0.318785275 |
| ENSGALG00010012275 | 0.797624537 | 0.523621078 |
| ENSGALG00010012277 | 0.961918481 | 0.350411924 |
| ENSGALG00010012282 | 0.318751865 | 0.188158991 |
| ENSGALG00010012283 | 0.560044412 | 0.180483666 |
| ENSGALG00010012285 | 0.977545297 | 0.259040801 |
| ENSGALG00010012286 | 0.040734307 | 0.154016134 |
| ENSGALG00010012288 | 0.98483695  | 0.314479719 |
| ENSGALG00010012290 | 0.583257835 | 0.337519129 |
| ENSGALG00010012291 | 0.981750062 | 0.223630472 |
| ENSGALG00010012293 | 0.829965192 | 0.175506801 |
| ENSGALG00010012294 | 0.009594157 | 0.270843457 |
| ENSGALG00010012295 | 0.71344741  | 0.392629386 |
| ENSGALG00010012297 | 0.863716215 | 0.322674661 |
| ENSGALG00010012300 | 0.600866026 | 0.246190073 |
| ENSGALG00010012303 | 0.938919015 | 0.267220006 |
| ENSGALG00010012304 | 0.492536268 | 0.31590125  |
| ENSGALG00010012307 | 0.928283601 | 0.259762964 |
| ENSGALG00010012308 | 0.984910628 | 0.289410171 |
| ENSGALG00010012309 | 0.932042276 | 0.363336613 |
| ENSGALG00010012310 | 0.386940806 | 0.06873218  |
| ENSGALG00010012311 | 0.989504321 | 0.275796974 |
| ENSGALG00010012312 | 0.981446791 | 0.316299608 |
| ENSGALG00010012314 | 0.496369668 | 0.341817516 |
| ENSGALG00010012315 | 0.900098315 | 0.336324608 |
| ENSGALG00010012317 | 0.227111494 | 0.478993975 |
| ENSGALG00010012318 | 0.332220106 | 0.153703265 |
| ENSGALG00010012320 | 0.923631494 | 0.155388383 |
| ENSGALG00010012321 | 0.533598147 | 0.305978427 |
| ENSGALG00010012322 | 0.954745728 | 0.221589221 |
| ENSGALG00010012324 | 0.922309956 | 0.2753587   |
| ENSGALG00010012325 | 0.973518758 | 0.238416592 |
| ENSGALG00010012326 | 0.721461475 | 0.629639103 |
| ENSGALG00010012327 | 0.593036553 | 0.148278906 |
| ENSGALG00010012328 | 0.261809432 | 0.131901688 |
| ENSGALG00010012329 | 0.842005794 | 0.370906455 |
| ENSGALG00010012330 | 0.633564993 | 0.334007398 |
| ENSGALG00010012331 | 0.864040535 | 0.326306194 |
| ENSGALG00010012332 | 0.131918545 | 0.181841852 |
| ENSGALG00010012334 | 0.811826751 | 0.18604391  |
| ENSGALG00010012335 | 0.396365709 | 0.157137627 |
| ENSGALG00010012337 | 0.982032159 | 0.363181737 |
| ENSGALG00010012338 | 0.285027102 | 0.109308519 |
| ENSGALG00010012339 | 0.95778692  | 0.201483129 |
| ENSGALG00010012340 | 0.8194132   | 0.250772438 |
| ENSGALG00010012341 | 0.786774319 | 0.51245832  |
| ENSGALG00010012343 | 0.981151967 | 0.335326146 |
| ENSGALG00010012344 | 0.445792306 | 0.32865935  |
| ENSGALG00010012345 | 0.941577939 | 0.307717971 |
| ENSGALG00010012346 | 0.910597868 | 0.360675962 |
| ENSGALG00010012347 | 0.418197165 | 0.554176065 |
| ENSGALG00010012348 | 0.058620363 | 0.471716419 |

|                    |             |             |
|--------------------|-------------|-------------|
| ENSGALG00010012349 | 0.207523649 | 0.231661294 |
| ENSGALG00010012350 | 0.909593537 | 0.27493151  |
| ENSGALG00010012351 | 0.050427635 | 0.416779832 |
| ENSGALG00010012352 | 0.974230883 | 0.311820961 |
| ENSGALG00010012353 | 0.93377224  | 0.458906272 |
| ENSGALG00010012354 | 0.757025665 | 0.129106577 |
| ENSGALG00010012355 | 0.054289971 | 0.14989198  |
| ENSGALG00010012356 | 0.636293872 | 0.271787957 |
| ENSGALG00010012358 | 0.974529044 | 0.274091525 |
| ENSGALG00010012360 | 0.894413549 | 0.145472276 |
| ENSGALG00010012361 | 0.37532191  | 0.151592009 |
| ENSGALG00010012362 | 0.941443896 | 0.405473476 |
| ENSGALG00010012363 | 0.050115024 | 0.155140157 |
| ENSGALG00010012364 | 0.708784202 | 0.306571811 |
| ENSGALG00010012366 | 0.459976308 | 0.149302045 |
| ENSGALG00010012367 | 0.967302054 | 0.238078739 |
| ENSGALG00010012371 | 0.28803962  | 0.178648102 |
| ENSGALG00010012372 | 0.091357271 | 0.008097583 |
| ENSGALG00010012373 | 0.145804588 | 0.172052153 |
| ENSGALG00010012374 | 0.1156088   | 0.565879625 |
| ENSGALG00010012376 | 0.985108869 | 0.336097591 |
| ENSGALG00010012377 | 0.152378064 | 0.375902785 |
| ENSGALG00010012378 | 0.707581681 | 0.293466375 |
| ENSGALG00010012382 | 0.981656642 | 0.302877008 |
| ENSGALG00010012384 | 0.611102521 | 0.064932306 |
| ENSGALG00010012385 | 0.571830253 | 0.224407096 |
| ENSGALG00010012386 | 0.606850138 | 0.224565697 |
| ENSGALG00010012387 | 0.90460781  | 0.361483177 |
| ENSGALG00010012390 | 0.826267573 | 0.353913597 |
| ENSGALG00010012391 | 0.923394045 | 0.2211967   |
| ENSGALG00010012393 | 0.396668506 | 0.181671381 |
| ENSGALG00010012394 | 0.304133466 | 0.450346192 |
| ENSGALG00010012396 | 0.259919719 | 0.138129481 |
| ENSGALG00010012398 | 0.071739017 | 0.123227448 |
| ENSGALG00010012399 | 0.83433789  | 0.179111956 |
| ENSGALG00010012401 | 0.837369367 | 0.169404126 |
| ENSGALG00010012402 | 0.327556138 | 0.190619202 |
| ENSGALG00010012404 | 0.885694347 | 0.270783967 |
| ENSGALG00010012405 | 0.977455749 | 0.341258246 |
| ENSGALG00010012406 | 0.995240169 | 0.34172099  |
| ENSGALG00010012407 | 0.753757416 | 0.224533221 |
| ENSGALG00010012408 | 0.498823559 | 0.228261749 |
| ENSGALG00010012410 | 0.562414505 | 0.126282851 |
| ENSGALG00010012412 | 0.349690836 | 0.193540413 |
| ENSGALG00010012413 | 0.769546493 | 0.090789531 |
| ENSGALG00010012414 | 0.99007082  | 0.314777542 |
| ENSGALG00010012415 | 0.96839657  | 0.281924941 |
| ENSGALG00010012416 | 0.184899013 | 0.310405855 |
| ENSGALG00010012417 | 0.231139392 | 0.273128114 |
| ENSGALG00010012418 | 0.487231014 | 0.183681527 |
| ENSGALG00010012419 | 0.662050395 | 0.078680491 |
| ENSGALG00010012420 | 0.645118714 | 0.147260876 |
| ENSGALG00010012421 | 0.152833232 | 0.262330917 |
| ENSGALG00010012423 | 0.303948957 | 0.198834601 |
| ENSGALG00010012424 | 0.97646959  | 0.332828577 |
| ENSGALG00010012425 | 0.425164887 | 0.172951222 |



|                    |             |             |
|--------------------|-------------|-------------|
| ENSGALG00010012426 | 0.174563446 | 0.271427293 |
| ENSGALG00010012427 | 0.935808208 | 0.215216328 |
| ENSGALG00010012428 | 0.792193773 | 0.449381784 |
| ENSGALG00010012429 | 0.811014252 | 0.4121805   |
| ENSGALG00010012430 | 0.98385022  | 0.361496179 |
| ENSGALG00010012431 | 0.574204409 | 0.334056756 |
| ENSGALG00010012432 | 0.219386918 | 0.079388121 |
| ENSGALG00010012433 | 0.336450291 | 0.253393944 |
| ENSGALG00010012434 | 0.28826843  | 0.31329886  |
| ENSGALG00010012435 | 0.201440626 | 0.168570114 |
| ENSGALG00010012436 | 0.985533363 | 0.311238691 |
| ENSGALG00010012438 | 0.160795421 | 0.445532741 |
| ENSGALG00010012439 | 0.981614447 | 0.347223329 |
| ENSGALG00010012440 | 0.763784697 | 0.239117837 |
| ENSGALG00010012441 | 0.918476609 | 0.223956509 |
| ENSGALG00010012442 | 0.490454122 | 0.282890368 |
| ENSGALG00010012444 | 0.825053966 | 0.148927487 |
| ENSGALG00010012445 | 0.987502646 | 0.325126312 |
| ENSGALG00010012447 | 0.982199344 | 0.353876745 |
| ENSGALG00010012448 | 0.271701261 | 0.072417625 |
| ENSGALG00010012449 | 0.157606591 | 0.003198891 |
| ENSGALG00010012450 | 0.923319574 | 0.320674382 |
| ENSGALG00010012452 | 0.835014971 | 0.090886509 |
| ENSGALG00010012454 | 0.789133545 | 0.291823727 |
| ENSGALG00010012455 | 0.979295637 | 0.322715225 |
| ENSGALG00010012456 | 0.256700942 | 0.029107591 |
| ENSGALG00010012458 | 0.569213355 | 0.413228599 |
| ENSGALG00010012459 | 0.039898928 | 0.722052861 |
| ENSGALG00010012461 | 0.018104086 | 0.245325562 |
| ENSGALG00010012463 | 0.0976492   | 0.374558104 |
| ENSGALG00010012465 | 0.900518559 | 0.354712876 |
| ENSGALG00010012466 | 0.951418686 | 0.401966527 |
| ENSGALG00010012467 | 0.284702565 | 0.095129525 |
| ENSGALG00010012468 | 0.044895337 | 0.187903904 |
| ENSGALG00010012469 | 0.349430636 | 0.36405034  |
| ENSGALG00010012470 | 0.182910978 | 0.260673537 |
| ENSGALG00010012473 | 0.401704699 | 0.049652806 |
| ENSGALG00010012474 | 0.452379072 | 0.184632839 |
| ENSGALG00010012475 | 0.783296581 | 0.247292294 |
| ENSGALG00010012476 | 0.207501166 | 0.223174188 |
| ENSGALG00010012477 | 0.223187706 | 0.482797555 |
| ENSGALG00010012478 | 0.627100959 | 0.454854599 |
| ENSGALG00010012479 | 0.540436126 | 0.170669315 |
| ENSGALG00010012480 | 0.926750888 | 0.449503943 |
| ENSGALG00010012481 | 0.737748439 | 0.414034002 |
| ENSGALG00010012482 | 0.147900396 | 0.135481317 |
| ENSGALG00010012483 | 0.907415256 | 0.239804401 |
| ENSGALG00010012484 | 0.258650604 | 0.15311761  |
| ENSGALG00010012485 | 0.995054357 | 0.361456333 |
| ENSGALG00010012486 | 0.307568048 | 0.311026784 |
| ENSGALG00010012487 | 0.028771779 | 0.267362337 |
| ENSGALG00010012490 | 0.366461586 | 0.435165612 |
| ENSGALG00010012491 | 0.424053777 | 0.266333122 |
| ENSGALG00010012492 | 0.891806398 | 0.500598385 |
| ENSGALG00010012495 | 0.189240572 | 0.04996112  |
| ENSGALG00010012496 | 0.743139776 | 0.355567883 |

|                    |             |             |
|--------------------|-------------|-------------|
| ENSGALG00010012497 | 0.110503813 | 0.002612981 |
| ENSGALG00010012498 | 0.968710579 | 0.488053318 |
| ENSGALG00010012500 | 0.888112389 | 0.310832102 |
| ENSGALG00010012501 | 0.480745159 | 0.185706431 |
| ENSGALG00010012502 | 0.98644039  | 0.331556433 |
| ENSGALG00010012503 | 0.845393165 | 0.267369649 |
| ENSGALG00010012506 | 0.958930335 | 0.362595317 |
| ENSGALG00010012507 | 0.10496232  | 0.284871669 |
| ENSGALG00010012508 | 0.235532273 | 0.272683833 |
| ENSGALG00010012509 | 0.934802528 | 0.2417222   |
| ENSGALG00010012511 | 0.98139591  | 0.278234315 |
| ENSGALG00010012515 | 0.779159997 | 0.251493389 |
| ENSGALG00010012516 | 0.043079977 | 0.106820669 |
| ENSGALG00010012517 | 0.876723213 | 0.261290763 |
| ENSGALG00010012518 | 0.285272007 | 0.109169955 |
| ENSGALG00010012519 | 0.016679716 | 0.125258416 |
| ENSGALG00010012521 | 0.905091877 | 0.242040794 |
| ENSGALG00010012522 | 0.096023914 | 0.145693557 |
| ENSGALG00010012524 | 0.333055781 | 0.096253646 |
| ENSGALG00010012526 | 0.102155    | 0.184542342 |
| ENSGALG00010012528 | 0.440638897 | 0.196247805 |
| ENSGALG00010012529 | 0.053111065 | 0.094060283 |
| ENSGALG00010012530 | 0.923149155 | 0.299023111 |
| ENSGALG00010012531 | 0.106706915 | 0.415508417 |
| ENSGALG00010012532 | 0.978739864 | 0.310561329 |
| ENSGALG00010012534 | 0.771293331 | 0.191823329 |
| ENSGALG00010012535 | 0.816879584 | 0.191757171 |
| ENSGALG00010012536 | 0.798749411 | 0.230799681 |
| ENSGALG00010012538 | 0.914088602 | 0.251961309 |
| ENSGALG00010012539 | 0.418335342 | 0.459088865 |
| ENSGALG00010012541 | 0.484301047 | 0.333128977 |
| ENSGALG00010012542 | 0.185560646 | 0.225434998 |
| ENSGALG00010012543 | 0.143531397 | 0.220035291 |
| ENSGALG00010012544 | 0.504678782 | 0.156838383 |
| ENSGALG00010012545 | 0.436312113 | 0.104683013 |
| ENSGALG00010012546 | 0.888142974 | 0.171358731 |
| ENSGALG00010012547 | 0.494563401 | 0.059937476 |
| ENSGALG00010012548 | 0.123221853 | 0.214803776 |
| ENSGALG00010012550 | 0.920457036 | 0.317977553 |
| ENSGALG00010012551 | 0.577283617 | 0.292634635 |
| ENSGALG00010012552 | 0.528039363 | 0.002163392 |
| ENSGALG00010012553 | 0.354417038 | 0.138796309 |
| ENSGALG00010012555 | 0.894087157 | 0.197143339 |
| ENSGALG00010012558 | 0.219386918 | 0.079388121 |
| ENSGALG00010012561 | 0.850758163 | 0.089737487 |
| ENSGALG00010012565 | 0.981065576 | 0.338952903 |
| ENSGALG00010012569 | 0.969635858 | 0.287643891 |
| ENSGALG00010012571 | 0.854796381 | 0.120363122 |
| ENSGALG00010012573 | 0.377900487 | 0.132867801 |
| ENSGALG00010012574 | 0.910281944 | 0.31206034  |
| ENSGALG00010012575 | 0.089301885 | 0.168307621 |
| ENSGALG00010012578 | 0.865189961 | 0.310834508 |
| ENSGALG00010012581 | 0.265558089 | 0.028821141 |
| ENSGALG00010012582 | 0.388067758 | 0.028544245 |
| ENSGALG00010012583 | 0.86851384  | 0.449425037 |
| ENSGALG00010012586 | 0.852724587 | 0.390174226 |

|                    |             |             |
|--------------------|-------------|-------------|
| ENSGALG00010012587 | 0.93536289  | 0.19282432  |
| ENSGALG00010012588 | 0.662958687 | 0.33842952  |
| ENSGALG00010012593 | 0.279338442 | 0.135977135 |
| ENSGALG00010012598 | 0.320167986 | 0.215348639 |
| ENSGALG00010012599 | 0.939986021 | 0.290949926 |
| ENSGALG00010012600 | 0.87913811  | 0.326023343 |
| ENSGALG00010012601 | 0.953848335 | 0.300832653 |
| ENSGALG00010012603 | 0.35306172  | 0.17929633  |
| ENSGALG00010012606 | 0.533616741 | 0.359660376 |
| ENSGALG00010012607 | 0.855594154 | 0.184372797 |
| ENSGALG00010012609 | 0.33982727  | 0.065786191 |
| ENSGALG00010012610 | 0.846923655 | 0.176340111 |
| ENSGALG00010012614 | 0.390741705 | 0.105825194 |
| ENSGALG00010012615 | 0.923837771 | 0.334933259 |
| ENSGALG00010012616 | 0.954442436 | 0.347228457 |
| ENSGALG00010012617 | 0.839693672 | 0.345336077 |
| ENSGALG00010012618 | 0.592054958 | 0.077330337 |
| ENSGALG00010012620 | 0.879690748 | 0.136711034 |
| ENSGALG00010012624 | 0.856092572 | 0.35545908  |
| ENSGALG00010012626 | 0.308758304 | 0.100827364 |
| ENSGALG00010012627 | 0.478532683 | 0.276324085 |
| ENSGALG00010012629 | 0.679938259 | 0.076307577 |
| ENSGALG00010012630 | 0.691772697 | 0.265280889 |
| ENSGALG00010012631 | 0.945439413 | 0.31158569  |
| ENSGALG00010012632 | 0.180359236 | 0.196434749 |
| ENSGALG00010012633 | 0.935259333 | 0.368220395 |
| ENSGALG00010012634 | 0.892591301 | 0.335561263 |
| ENSGALG00010012636 | 0.366176244 | 0.210393853 |
| ENSGALG00010012637 | 0.256828349 | 0.119064955 |
| ENSGALG00010012638 | 0.84655472  | 0.481527822 |
| ENSGALG00010012639 | 0.077872215 | 0.13850113  |
| ENSGALG00010012640 | 0.693970072 | 0.324606355 |
| ENSGALG00010012648 | 0.467225506 | 0.037644195 |
| ENSGALG00010012650 | 0.970034656 | 0.315875563 |
| ENSGALG00010012651 | 0.320640563 | 0.165169259 |
| ENSGALG00010012652 | 0.681666871 | 0.244221564 |
| ENSGALG00010012653 | 0.33627712  | 0.221904457 |
| ENSGALG00010012654 | 0.78902262  | 0.397924266 |
| ENSGALG00010012655 | 0.39155441  | 0.07460765  |
| ENSGALG00010012657 | 0.482258779 | 0.139453091 |
| ENSGALG00010012658 | 0.369478107 | 0.160897087 |
| ENSGALG00010012661 | 0.991034801 | 0.332083692 |
| ENSGALG00010012662 | 0.967251236 | 0.207557067 |
| ENSGALG00010012664 | 0.482218067 | 0.194074951 |
| ENSGALG00010012665 | 0.954692102 | 0.303515451 |
| ENSGALG00010012667 | 0.952349996 | 0.314853194 |
| ENSGALG00010012669 | 0.931595467 | 0.194248009 |
| ENSGALG00010012670 | 0.616467441 | 0.145209983 |
| ENSGALG00010012671 | 0.918948978 | 0.298235527 |
| ENSGALG00010012672 | 0.840755703 | 0.201415294 |
| ENSGALG00010012673 | 0.784270131 | 0.11015394  |
| ENSGALG00010012674 | 0.885978898 | 0.323641006 |
| ENSGALG00010012675 | 0.428199258 | 0.187309964 |
| ENSGALG00010012676 | 0.021423515 | 0.158182295 |
| ENSGALG00010012677 | 0.907197965 | 0.367767083 |
| ENSGALG00010012678 | 0.057360065 | 0.288973595 |

|                    |             |             |
|--------------------|-------------|-------------|
| ENSGALG00010012680 | 0.131379375 | 0.266309757 |
| ENSGALG00010012682 | 0.99061937  | 0.314919446 |
| ENSGALG00010012683 | 0.253080239 | 0.071438614 |
| ENSGALG00010012685 | 0.953581106 | 0.364167374 |
| ENSGALG00010012687 | 0.895116529 | 0.426644725 |
| ENSGALG00010012688 | 0.831551725 | 0.279505285 |
| ENSGALG00010012690 | 0.972087552 | 0.3398272   |
| ENSGALG00010012693 | 0.968293398 | 0.334332521 |
| ENSGALG00010012694 | 0.687060737 | 0.105008607 |
| ENSGALG00010012696 | 0.559941816 | 0.227309176 |
| ENSGALG00010012697 | 0.71507851  | 0.415868115 |
| ENSGALG00010012698 | 0.427728838 | 0.289863623 |
| ENSGALG00010012699 | 0.964338203 | 0.369949645 |
| ENSGALG00010012700 | 0.664802011 | 0.043279908 |
| ENSGALG00010012701 | 0.827077973 | 0.51343655  |
| ENSGALG00010012702 | 0.320093614 | 0.017032614 |
| ENSGALG00010012704 | 0.487936173 | 0.069374768 |
| ENSGALG00010012705 | 0.939684008 | 0.252055779 |
| ENSGALG00010012706 | 0.748706375 | 0.418423461 |
| ENSGALG00010012707 | 0.805256614 | 0.483978725 |
| ENSGALG00010012708 | 0.989043066 | 0.378861101 |
| ENSGALG00010012709 | 0.629620506 | 0.376962614 |
| ENSGALG00010012710 | 0.760427351 | 0.274732079 |
| ENSGALG00010012711 | 0.702566824 | 0.250353251 |
| ENSGALG00010012712 | 0.924407065 | 0.270092708 |
| ENSGALG00010012713 | 0.842351443 | 0.116818566 |
| ENSGALG00010012714 | 0.61965133  | 0.333720481 |
| ENSGALG00010012715 | 0.134457843 | 0.174600213 |
| ENSGALG00010012717 | 0.696981676 | 0.288043    |
| ENSGALG00010012718 | 0.006468973 | 0.227828661 |
| ENSGALG00010012719 | 0.286700987 | 0.26294128  |
| ENSGALG00010012720 | 0.9517374   | 0.287380978 |
| ENSGALG00010012722 | 0.826700958 | 0.096699598 |
| ENSGALG00010012723 | 0.200629457 | 0.015680852 |
| ENSGALG00010012725 | 0.640587126 | 0.484704546 |
| ENSGALG00010012726 | 0.955054757 | 0.235894375 |
| ENSGALG00010012728 | 0.900440722 | 0.255363138 |
| ENSGALG00010012730 | 0.995635201 | 0.334531297 |
| ENSGALG00010012732 | 0.993927937 | 0.341635287 |
| ENSGALG00010012734 | 0.980077645 | 0.443247542 |
| ENSGALG00010012736 | 0.35371609  | 0.133957029 |
| ENSGALG00010012738 | 0.824004493 | 0.191841019 |
| ENSGALG00010012739 | 0.729129214 | 0.245361794 |
| ENSGALG00010012741 | 0.634111492 | 0.121503578 |
| ENSGALG00010012742 | 0.017725483 | 0.35627553  |
| ENSGALG00010012743 | 0.913417352 | 0.498274914 |
| ENSGALG00010012744 | 0.780666654 | 0.059672412 |
| ENSGALG00010012745 | 0.380930144 | 0.086707133 |
| ENSGALG00010012747 | 0.495134485 | 0.15931316  |
| ENSGALG00010012749 | 0.947524198 | 0.250626802 |
| ENSGALG00010012750 | 0.985494141 | 0.372589937 |
| ENSGALG00010012751 | 0.382747803 | 0.311297893 |
| ENSGALG00010012753 | 0.906052205 | 0.365129114 |
| ENSGALG00010012754 | 0.870283988 | 0.085269952 |
| ENSGALG00010012756 | 0.903604259 | 0.137741229 |
| ENSGALG00010012757 | 0.038205268 | 0.175236885 |

|                    |             |             |
|--------------------|-------------|-------------|
| ENSGALG00010012758 | 0.97095346  | 0.359161351 |
| ENSGALG00010012759 | 0.989052133 | 0.359211312 |
| ENSGALG00010012760 | 0.77409288  | 0.136832823 |
| ENSGALG00010012761 | 0.95179082  | 0.39795743  |
| ENSGALG00010012763 | 0.808974326 | 0.161374599 |
| ENSGALG00010012764 | 0.07135513  | 0.010771078 |
| ENSGALG00010012765 | 0.962934691 | 0.269581059 |
| ENSGALG00010012767 | 0.793837951 | 0.267291135 |
| ENSGALG00010012768 | 0.146831018 | 0.000510697 |
| ENSGALG00010012769 | 0.662007748 | 0.33640812  |
| ENSGALG00010012770 | 0.399510177 | 0.196523757 |
| ENSGALG00010012771 | 0.907945243 | 0.252282549 |
| ENSGALG00010012772 | 0.595497275 | 0.208160805 |
| ENSGALG00010012773 | 0.347912442 | 0.498477449 |
| ENSGALG00010012774 | 0.21646968  | 0.224197516 |
| ENSGALG00010012775 | 0.96202123  | 0.332127496 |
| ENSGALG00010012778 | 0.90025796  | 0.392769876 |
| ENSGALG00010012780 | 0.940752835 | 0.366457481 |
| ENSGALG00010012783 | 0.185154775 | 0.182180622 |
| ENSGALG00010012786 | 0.921248732 | 0.259053193 |
| ENSGALG00010012787 | 0.759281927 | 0.242570863 |
| ENSGALG00010012788 | 0.916752731 | 0.280237842 |
| ENSGALG00010012790 | 0.500575338 | 0.355176858 |
| ENSGALG00010012791 | 0.507722517 | 0.294539081 |
| ENSGALG00010012792 | 0.983583058 | 0.312096022 |
| ENSGALG00010012793 | 0.395803147 | 0.099256728 |
| ENSGALG00010012794 | 0.852638829 | 0.277132728 |
| ENSGALG00010012795 | 0.489736563 | 0.24283089  |
| ENSGALG00010012796 | 0.29209194  | 0.099161951 |
| ENSGALG00010012797 | 0.583693577 | 0.098099878 |
| ENSGALG00010012798 | 0.967040519 | 0.377354206 |
| ENSGALG00010012800 | 0.391612505 | 0.15490595  |
| ENSGALG00010012801 | 0.741376978 | 0.079203761 |
| ENSGALG00010012803 | 0.69160482  | 0.532495057 |
| ENSGALG00010012804 | 0.266137114 | 0.107784983 |
| ENSGALG00010012806 | 0.237507215 | 0.033759299 |
| ENSGALG00010012808 | 0.472235506 | 0.228108097 |
| ENSGALG00010012809 | 0.881511393 | 0.245213881 |
| ENSGALG00010012810 | 0.564422018 | 0.153298018 |
| ENSGALG00010012811 | 0.375669891 | 0.092329224 |
| ENSGALG00010012812 | 0.97780267  | 0.281859387 |
| ENSGALG00010012813 | 0.375832149 | 0.020903857 |
| ENSGALG00010012815 | 0.400855084 | 0.026171984 |
| ENSGALG00010012817 | 0.235630588 | 0.132393411 |
| ENSGALG00010012818 | 0.971199746 | 0.297327881 |
| ENSGALG00010012819 | 0.583806038 | 0.036279357 |
| ENSGALG00010012820 | 0.490568407 | 0.142044933 |
| ENSGALG00010012821 | 0.557794485 | 0.314986758 |
| ENSGALG00010012822 | 0.659131761 | 0.230764572 |
| ENSGALG00010012823 | 0.115331852 | 0.198431602 |
| ENSGALG00010012824 | 0.799724669 | 0.319612781 |
| ENSGALG00010012827 | 0.285185205 | 0.344420234 |
| ENSGALG00010012829 | 0.4696407   | 0.312849397 |
| ENSGALG00010012830 | 0.872538587 | 0.263262315 |
| ENSGALG00010012831 | 0.708032956 | 0.199106175 |
| ENSGALG00010012832 | 0.072840675 | 0.489703365 |

|                    |             |             |
|--------------------|-------------|-------------|
| ENSGALG00010012833 | 0.976783979 | 0.334550276 |
| ENSGALG00010012837 | 0.228787754 | 0.341655482 |
| ENSGALG00010012838 | 0.783800537 | 0.083616413 |
| ENSGALG00010012839 | 0.853713832 | 0.146595111 |
| ENSGALG00010012841 | 0.419664541 | 0.148824383 |
| ENSGALG00010012842 | 0.61905265  | 0.420773165 |
| ENSGALG00010012843 | 0.195138246 | 0.231482553 |
| ENSGALG00010012845 | 0.108710153 | 0.051234388 |
| ENSGALG00010012846 | 0.219386918 | 0.079388121 |
| ENSGALG00010012847 | 0.606221342 | 0.295742364 |
| ENSGALG00010012848 | 0.49698425  | 0.254645201 |
| ENSGALG00010012849 | 0.988653324 | 0.315956341 |
| ENSGALG00010012850 | 0.140427317 | 0.043703647 |
| ENSGALG00010012851 | 0.44912152  | 0.175224723 |
| ENSGALG00010012852 | 0.978920651 | 0.38760232  |
| ENSGALG00010012853 | 0.517899914 | 0.299304996 |
| ENSGALG00010012854 | 0.791724325 | 0.221416023 |
| ENSGALG00010012856 | 0.142623147 | 0.224892044 |
| ENSGALG00010012857 | 0.967215219 | 0.278068684 |
| ENSGALG00010012858 | 0.435289332 | 0.284671205 |
| ENSGALG00010012859 | 0.051066209 | 0.423098498 |
| ENSGALG00010012861 | 0.426077687 | 0.046484676 |
| ENSGALG00010012863 | 0.553129673 | 0.133932121 |
| ENSGALG00010012864 | 0.798911201 | 0.333239032 |
| ENSGALG00010012865 | 0.360928096 | 0.355037954 |
| ENSGALG00010012867 | 0.947897154 | 0.311950861 |
| ENSGALG00010012868 | 0.594361064 | 0.127159578 |
| ENSGALG00010012869 | 0.441003917 | 0.00014656  |
| ENSGALG00010012870 | 0.62979145  | 0.210554592 |
| ENSGALG00010012871 | 0.931448409 | 0.337425464 |
| ENSGALG00010012872 | 0.495402284 | 0.127956075 |
| ENSGALG00010012873 | 0.956056924 | 0.321360548 |
| ENSGALG00010012874 | 0.322438603 | 0.055248649 |
| ENSGALG00010012875 | 0.556689828 | 0.103602014 |
| ENSGALG00010012876 | 0.611661406 | 0.494775619 |
| ENSGALG00010012877 | 0.874127723 | 0.279158968 |
| ENSGALG00010012878 | 0.950008175 | 0.277731572 |
| ENSGALG00010012879 | 0.759498468 | 0.285231398 |
| ENSGALG00010012880 | 0.488416338 | 0.499905741 |
| ENSGALG00010012882 | 0.068222048 | 0.118981567 |
| ENSGALG00010012883 | 0.636877013 | 0.031293119 |
| ENSGALG00010012885 | 0.431701014 | 0.015237304 |
| ENSGALG00010012886 | 0.846731822 | 0.423761954 |
| ENSGALG00010012887 | 0.547472316 | 0.435242124 |
| ENSGALG00010012889 | 0.969796808 | 0.380097946 |
| ENSGALG00010012890 | 0.439976036 | 0.070078374 |
| ENSGALG00010012891 | 0.927867736 | 0.277819037 |
| ENSGALG00010012892 | 0.844452562 | 0.140296981 |
| ENSGALG00010012893 | 0.970288748 | 0.338434464 |
| ENSGALG00010012894 | 0.925763108 | 0.186861865 |
| ENSGALG00010012895 | 0.559355469 | 0.17881983  |
| ENSGALG00010012896 | 0.796751659 | 0.213931251 |
| ENSGALG00010012898 | 0.97468173  | 0.328796166 |
| ENSGALG00010012899 | 0.507931946 | 0.42824933  |
| ENSGALG00010012900 | 0.968076662 | 0.276091666 |
| ENSGALG00010012901 | 0.560358098 | 0.092936969 |

|                    |             |             |
|--------------------|-------------|-------------|
| ENSGALG00010012902 | 0.409026918 | 0.082023497 |
| ENSGALG00010012903 | 0.942910984 | 0.404307597 |
| ENSGALG00010012904 | 0.993004092 | 0.359003377 |
| ENSGALG00010012905 | 0.107321708 | 0.10166927  |
| ENSGALG00010012907 | 0.396343306 | 0.152518913 |
| ENSGALG00010012908 | 0.953249642 | 0.245105459 |
| ENSGALG00010012909 | 0.331118301 | 0.219019524 |
| ENSGALG00010012910 | 0.917405148 | 0.294920562 |
| ENSGALG00010012911 | 0.718870699 | 0.214919053 |
| ENSGALG00010012912 | 0.734728052 | 0.156530679 |
| ENSGALG00010012913 | 0.90404366  | 0.413757384 |
| ENSGALG00010012914 | 0.285272007 | 0.109169955 |
| ENSGALG00010012915 | 0.970984761 | 0.301824694 |
| ENSGALG00010012917 | 0.850346273 | 0.350327126 |
| ENSGALG00010012918 | 0.473579686 | 0.389254386 |
| ENSGALG00010012920 | 0.518726358 | 0.25865655  |
| ENSGALG00010012921 | 0.948071378 | 0.393805212 |
| ENSGALG00010012922 | 0.814749192 | 0.418986845 |
| ENSGALG00010012924 | 0.537735269 | 0.371708793 |
| ENSGALG00010012925 | 0.115956742 | 0.449011231 |
| ENSGALG00010012926 | 0.329515169 | 0.094740356 |
| ENSGALG00010012928 | 0.061961029 | 0.225806868 |
| ENSGALG00010012930 | 0.979250041 | 0.339994855 |
| ENSGALG00010012932 | 0.790116206 | 0.441666641 |
| ENSGALG00010012933 | 0.730453925 | 0.066477721 |
| ENSGALG00010012934 | 0.970570105 | 0.338671444 |
| ENSGALG00010012936 | 0.676940632 | 0.262331541 |
| ENSGALG00010012938 | 0.967154071 | 0.345180807 |
| ENSGALG00010012939 | 0.881873301 | 0.291313173 |
| ENSGALG00010012940 | 0.947755458 | 0.381162726 |
| ENSGALG00010012941 | 0.307432809 | 0.129569006 |
| ENSGALG00010012942 | 0.594006965 | 0.057682925 |
| ENSGALG00010012943 | 0.40134687  | 0.153836383 |
| ENSGALG00010012944 | 0.869044407 | 0.215148288 |
| ENSGALG00010012945 | 0.923547524 | 0.342557383 |
| ENSGALG00010012946 | 0.672549599 | 0.224112568 |
| ENSGALG00010012948 | 0.2105561   | 0.162872232 |
| ENSGALG00010012949 | 0.268460109 | 0.19945332  |
| ENSGALG00010012952 | 0.640339947 | 0.212828371 |
| ENSGALG00010012954 | 0.937181892 | 0.231199679 |
| ENSGALG00010012955 | 0.83642141  | 0.267069899 |
| ENSGALG00010012956 | 0.974686216 | 0.336426532 |
| ENSGALG00010012957 | 0.714136038 | 0.031180043 |
| ENSGALG00010012958 | 0.782387758 | 0.428807278 |
| ENSGALG00010012959 | 0.749533794 | 0.229108988 |
| ENSGALG00010012961 | 0.552861553 | 0.077303129 |
| ENSGALG00010012962 | 0.88256413  | 0.322308501 |
| ENSGALG00010012963 | 0.861064218 | 0.3211267   |
| ENSGALG00010012964 | 0.745105931 | 0.245959051 |
| ENSGALG00010012965 | 0.458057322 | 0.365278772 |
| ENSGALG00010012966 | 0.966740846 | 0.250119741 |
| ENSGALG00010012967 | 0.912472311 | 0.362886702 |
| ENSGALG00010012968 | 0.170159909 | 0.134031172 |
| ENSGALG00010012969 | 0.867121995 | 0.337643634 |
| ENSGALG00010012970 | 0.919847738 | 0.355828441 |
| ENSGALG00010012971 | 0.937410793 | 0.19651895  |

|                    |             |             |
|--------------------|-------------|-------------|
| ENSGALG00010012973 | 0.993956966 | 0.346106796 |
| ENSGALG00010012974 | 0.85487209  | 0.367531899 |
| ENSGALG00010012975 | 0.241449749 | 0.155703328 |
| ENSGALG00010012976 | 0.981728147 | 0.313083312 |
| ENSGALG00010012977 | 0.802844204 | 0.228419912 |
| ENSGALG00010012978 | 0.957862714 | 0.357894685 |
| ENSGALG00010012979 | 0.829424903 | 0.555206955 |
| ENSGALG00010012980 | 0.91374047  | 0.408727491 |
| ENSGALG00010012982 | 0.898517054 | 0.292105935 |
| ENSGALG00010012985 | 0.491976616 | 0.335944318 |
| ENSGALG00010012986 | 0.234659357 | 0.115936103 |
| ENSGALG00010012988 | 0.787070652 | 0.259030077 |
| ENSGALG00010012989 | 0.940310474 | 0.329299278 |
| ENSGALG00010012990 | 0.009670608 | 0.189027234 |
| ENSGALG00010012991 | 0.947946366 | 0.306567977 |
| ENSGALG00010012992 | 0.502468036 | 0.526580726 |
| ENSGALG00010012993 | 0.183571827 | 0.085549668 |
| ENSGALG00010012994 | 0.270197877 | 0.12072243  |
| ENSGALG00010012995 | 0.901276134 | 0.318071766 |
| ENSGALG00010012996 | 0.553663145 | 0.223151606 |
| ENSGALG00010012997 | 0.963370025 | 0.297926214 |
| ENSGALG00010012998 | 0.253223789 | 0.307730743 |
| ENSGALG00010012999 | 0.38742626  | 0.154147022 |
| ENSGALG00010013000 | 0.436322255 | 0.266523534 |
| ENSGALG00010013001 | 0.849160288 | 0.205370042 |
| ENSGALG00010013002 | 0.817563199 | 0.22553925  |
| ENSGALG00010013003 | 0.213460918 | 0.214911948 |
| ENSGALG00010013004 | 0.519050546 | 0.179642471 |
| ENSGALG00010013005 | 0.994108707 | 0.332750942 |
| ENSGALG00010013006 | 0.265558089 | 0.028821141 |
| ENSGALG00010013007 | 0.288631369 | 0.467279012 |
| ENSGALG00010013008 | 0.621536748 | 0.145694015 |
| ENSGALG00010013010 | 0.300391512 | 0.124478907 |
| ENSGALG00010013012 | 0.997877074 | 0.331027671 |
| ENSGALG00010013013 | 0.725814404 | 0.308959569 |
| ENSGALG00010013015 | 0.57639275  | 0.259579482 |
| ENSGALG00010013016 | 0.758045299 | 0.012940876 |
| ENSGALG00010013017 | 0.966636404 | 0.373068717 |
| ENSGALG00010013018 | 0.965182589 | 0.346374251 |
| ENSGALG00010013019 | 0.994261955 | 0.348011998 |
| ENSGALG00010013021 | 0.958534206 | 0.267805556 |
| ENSGALG00010013022 | 0.544039905 | 0.313740514 |
| ENSGALG00010013023 | 0.625843054 | 0.316717625 |
| ENSGALG00010013024 | 0.693623004 | 0.566100671 |
| ENSGALG00010013027 | 0.205317021 | 0.093923131 |
| ENSGALG00010013029 | 0.995906744 | 0.335332852 |
| ENSGALG00010013030 | 0.010672989 | 0.47373084  |
| ENSGALG00010013032 | 0.630689551 | 0.483978479 |
| ENSGALG00010013033 | 0.978460655 | 0.311685164 |
| ENSGALG00010013035 | 0.311289807 | 0.13851383  |
| ENSGALG00010013036 | 0.11416988  | 0.03314163  |
| ENSGALG00010013037 | 0.868201588 | 0.320925007 |
| ENSGALG00010013038 | 0.292351562 | 0.560458597 |
| ENSGALG00010013040 | 0.980408905 | 0.366120724 |
| ENSGALG00010013041 | 0.700531119 | 0.189755848 |
| ENSGALG00010013042 | 0.014273076 | 0.035587719 |



|                    |             |             |
|--------------------|-------------|-------------|
| ENSGALG00010013044 | 0.422397174 | 0.017509004 |
| ENSGALG00010013045 | 0.927684134 | 0.27154013  |
| ENSGALG00010013046 | 0.672269288 | 0.116974254 |
| ENSGALG00010013047 | 0.959678841 | 0.34424319  |
| ENSGALG00010013048 | 0.943974911 | 0.215139548 |
| ENSGALG00010013050 | 0.511740883 | 0.003206151 |
| ENSGALG00010013051 | 0.878139351 | 0.2086729   |
| ENSGALG00010013052 | 0.115193317 | 0.000304681 |
| ENSGALG00010013053 | 0.954398203 | 0.327928714 |
| ENSGALG00010013054 | 0.183950837 | 0.323670436 |
| ENSGALG00010013055 | 0.18067859  | 0.541007104 |
| ENSGALG00010013056 | 0.711594416 | 0.001865934 |
| ENSGALG00010013057 | 0.39144912  | 0.115895902 |
| ENSGALG00010013059 | 0.084821793 | 0.146645445 |
| ENSGALG00010013061 | 0.342359845 | 0.110452699 |
| ENSGALG00010013062 | 0.929017926 | 0.406505118 |
| ENSGALG00010013063 | 0.966192077 | 0.325715606 |
| ENSGALG00010013064 | 0.382985366 | 0.1291087   |
| ENSGALG00010013065 | 0.858419776 | 0.296573329 |
| ENSGALG00010013066 | 0.046063829 | 0.220739248 |
| ENSGALG00010013067 | 0.394752998 | 0.016143287 |
| ENSGALG00010013068 | 0.128163573 | 0.21927169  |
| ENSGALG00010013071 | 0.600813367 | 0.315438455 |
| ENSGALG00010013072 | 0.739299988 | 0.108395845 |
| ENSGALG00010013073 | 0.892602529 | 0.308174255 |
| ENSGALG00010013074 | 0.499459571 | 0.152683706 |
| ENSGALG00010013075 | 0.93303487  | 0.332848189 |
| ENSGALG00010013076 | 0.003057108 | 0.276477933 |
| ENSGALG00010013077 | 0.797443036 | 0.272307756 |
| ENSGALG00010013078 | 0.875830461 | 0.445819675 |
| ENSGALG00010013079 | 0.308547832 | 0.172637563 |
| ENSGALG00010013080 | 0.74025737  | 0.222284886 |
| ENSGALG00010013081 | 0.584770204 | 0.084517054 |
| ENSGALG00010013082 | 0.076007605 | 0.054683997 |
| ENSGALG00010013084 | 0.309286978 | 0.063036553 |
| ENSGALG00010013085 | 0.904206818 | 0.257036731 |
| ENSGALG00010013086 | 0.917451194 | 0.345050521 |
| ENSGALG00010013087 | 0.371571672 | 0.199269701 |
| ENSGALG00010013088 | 0.725372273 | 0.017422217 |
| ENSGALG00010013089 | 0.944195551 | 0.436636004 |
| ENSGALG00010013090 | 0.720035748 | 0.101905142 |
| ENSGALG00010013093 | 0.614921729 | 0.646970853 |
| ENSGALG00010013094 | 0.580623646 | 0.095274839 |
| ENSGALG00010013095 | 0.220398798 | 0.00169847  |
| ENSGALG00010013097 | 0.904049479 | 0.114567101 |
| ENSGALG00010013098 | 0.632899202 | 0.307043835 |
| ENSGALG00010013099 | 0.987174201 | 0.316707884 |
| ENSGALG00010013100 | 0.851463163 | 0.139170999 |
| ENSGALG00010013102 | 0.02951855  | 0.28924241  |
| ENSGALG00010013103 | 0.168217376 | 0.037373782 |
| ENSGALG00010013104 | 0.972739226 | 0.34140809  |
| ENSGALG00010013105 | 0.914411447 | 0.310687498 |
| ENSGALG00010013106 | 0.699591775 | 0.134683174 |
| ENSGALG00010013107 | 0.622879379 | 0.244012617 |
| ENSGALG00010013108 | 0.60640255  | 0.114394736 |
| ENSGALG00010013109 | 0.38742626  | 0.154147022 |

|                    |             |             |
|--------------------|-------------|-------------|
| ENSGALG00010013110 | 0.986998597 | 0.332530336 |
| ENSGALG00010013111 | 0.602543109 | 0.691259317 |
| ENSGALG00010013112 | 0.869399386 | 0.324034779 |
| ENSGALG00010013114 | 0.124407669 | 0.194148845 |
| ENSGALG00010013115 | 0.897951674 | 0.30085732  |
| ENSGALG00010013116 | 0.814164756 | 0.273467996 |
| ENSGALG00010013117 | 0.969189176 | 0.207147226 |
| ENSGALG00010013119 | 0.868927623 | 0.404759824 |
| ENSGALG00010013120 | 0.075263436 | 0.11005094  |
| ENSGALG00010013121 | 0.004573262 | 0.036546283 |
| ENSGALG00010013123 | 0.925665337 | 0.210545365 |
| ENSGALG00010013125 | 0.112239646 | 0.237257893 |
| ENSGALG00010013129 | 0.298939958 | 0.247157261 |
| ENSGALG00010013130 | 0.515648159 | 0.221536523 |
| ENSGALG00010013131 | 0.86877517  | 0.34194829  |
| ENSGALG00010013132 | 0.887508691 | 0.103808911 |
| ENSGALG00010013133 | 0.432649518 | 0.190750491 |
| ENSGALG00010013135 | 0.958026295 | 0.407977501 |
| ENSGALG00010013136 | 0.452135376 | 0.282059989 |
| ENSGALG00010013137 | 0.208964901 | 0.069432382 |
| ENSGALG00010013138 | 0.683247644 | 0.207785485 |
| ENSGALG00010013139 | 0.601516764 | 0.280227367 |
| ENSGALG00010013140 | 0.265558089 | 0.028821141 |
| ENSGALG00010013141 | 0.158511397 | 0.254537799 |
| ENSGALG00010013143 | 0.251949149 | 0.270716132 |
| ENSGALG00010013144 | 0.791501955 | 0.068577514 |
| ENSGALG00010013145 | 0.138801209 | 0.222746195 |
| ENSGALG00010013146 | 0.407265606 | 0.386201405 |
| ENSGALG00010013147 | 0.210713871 | 0.115110736 |
| ENSGALG00010013149 | 0.987115303 | 0.348793321 |
| ENSGALG00010013150 | 0.905970137 | 0.431645065 |
| ENSGALG00010013151 | 0.694508057 | 0.251340183 |
| ENSGALG00010013152 | 0.9858858   | 0.355944909 |
| ENSGALG00010013153 | 0.984444728 | 0.351033634 |
| ENSGALG00010013154 | 0.039738209 | 0.18370405  |
| ENSGALG00010013155 | 0.421886629 | 0.000190121 |
| ENSGALG00010013156 | 0.931049937 | 0.305664062 |
| ENSGALG00010013157 | 0.1910296   | 0.287114534 |
| ENSGALG00010013158 | 0.812590885 | 0.53724116  |
| ENSGALG00010013159 | 0.125281441 | 0.118461904 |
| ENSGALG00010013160 | 0.685051597 | 0.334884982 |
| ENSGALG00010013161 | 0.270451009 | 0.090541667 |
| ENSGALG00010013162 | 0.94359101  | 0.457438155 |
| ENSGALG00010013163 | 0.284129909 | 0.290334841 |
| ENSGALG00010013164 | 0.662118434 | 0.218933793 |
| ENSGALG00010013165 | 0.714446419 | 0.416103436 |
| ENSGALG00010013166 | 0.001199338 | 0.314578006 |
| ENSGALG00010013167 | 0.140453364 | 0.019948235 |
| ENSGALG00010013168 | 0.929333291 | 0.198956143 |
| ENSGALG00010013170 | 0.922155003 | 0.545166182 |
| ENSGALG00010013171 | 0.865357157 | 0.466686804 |
| ENSGALG00010013172 | 0.878893704 | 0.256200193 |
| ENSGALG00010013173 | 0.582627145 | 0.247109925 |
| ENSGALG00010013174 | 0.198191448 | 0.329896384 |
| ENSGALG00010013175 | 0.968998033 | 0.315365358 |
| ENSGALG00010013176 | 0.787095582 | 0.30351993  |

|                    |             |             |
|--------------------|-------------|-------------|
| ENSGALG00010013177 | 0.812332589 | 0.311775053 |
| ENSGALG00010013179 | 0.943667915 | 0.228953818 |
| ENSGALG00010013180 | 0.977884335 | 0.30196188  |
| ENSGALG00010013181 | 0.946254185 | 0.23885685  |
| ENSGALG00010013182 | 0.908422762 | 0.20536705  |
| ENSGALG00010013183 | 0.978671824 | 0.318206693 |
| ENSGALG00010013184 | 0.980971978 | 0.295313671 |
| ENSGALG00010013185 | 0.235630588 | 0.132393411 |
| ENSGALG00010013186 | 0.758100695 | 0.374579111 |
| ENSGALG00010013187 | 0.96766936  | 0.394697522 |
| ENSGALG00010013188 | 0.854212448 | 0.276834145 |
| ENSGALG00010013190 | 0.377961669 | 0.085197514 |
| ENSGALG00010013191 | 0.967986434 | 0.32332636  |
| ENSGALG00010013192 | 0.94292625  | 0.22325484  |
| ENSGALG00010013194 | 0.893537899 | 0.136317248 |
| ENSGALG00010013196 | 0.883861953 | 0.293160496 |
| ENSGALG00010013197 | 0.260964826 | 0.225732368 |
| ENSGALG00010013198 | 0.720981377 | 0.397696241 |
| ENSGALG00010013199 | 0.179605246 | 0.330783199 |
| ENSGALG00010013200 | 0.488705491 | 0.213231432 |
| ENSGALG00010013201 | 0.99443267  | 0.333383182 |
| ENSGALG00010013203 | 0.977356503 | 0.35727055  |
| ENSGALG00010013205 | 0.213052756 | 0.05934831  |
| ENSGALG00010013206 | 0.867460006 | 0.26941595  |
| ENSGALG00010013207 | 0.963837447 | 0.385649031 |
| ENSGALG00010013209 | 0.630351515 | 0.095075307 |
| ENSGALG00010013212 | 0.532936589 | 0.31342651  |
| ENSGALG00010013213 | 0.88502559  | 0.219231208 |
| ENSGALG00010013214 | 0.978925145 | 0.286120388 |
| ENSGALG00010013215 | 0.828686031 | 0.227712533 |
| ENSGALG00010013216 | 0.117823061 | 0.361091486 |
| ENSGALG00010013217 | 0.729843171 | 0.172421047 |
| ENSGALG00010013219 | 0.811680645 | 0.450293042 |
| ENSGALG00010013220 | 0.59724041  | 0.302964513 |
| ENSGALG00010013221 | 0.319654199 | 0.155938046 |
| ENSGALG00010013222 | 0.496004799 | 0.24797181  |
| ENSGALG00010013223 | 0.93554292  | 0.322431912 |
| ENSGALG00010013224 | 0.073099841 | 0.111283213 |
| ENSGALG00010013225 | 0.991738041 | 0.36318577  |
| ENSGALG00010013226 | 0.907403298 | 0.275964468 |
| ENSGALG00010013227 | 0.984963854 | 0.327578122 |
| ENSGALG00010013228 | 0.893486209 | 0.271024401 |
| ENSGALG00010013230 | 0.924765395 | 0.362815731 |
| ENSGALG00010013231 | 0.827338693 | 0.262283987 |
| ENSGALG00010013232 | 0.959520964 | 0.223183056 |
| ENSGALG00010013233 | 0.409080899 | 0.210897434 |
| ENSGALG00010013234 | 0.683350354 | 0.163485719 |
| ENSGALG00010013235 | 0.993060623 | 0.348360901 |
| ENSGALG00010013236 | 0.871626274 | 0.294063497 |
| ENSGALG00010013237 | 0.311987459 | 0.064338115 |
| ENSGALG00010013238 | 0.703590621 | 0.201134517 |
| ENSGALG00010013241 | 0.756261918 | 0.204456111 |
| ENSGALG00010013242 | 0.517531226 | 0.01408974  |
| ENSGALG00010013243 | 0.511276417 | 0.122678557 |
| ENSGALG00010013244 | 0.107716594 | 0.135876583 |
| ENSGALG00010013245 | 0.350952883 | 0.063602806 |

|                    |             |             |
|--------------------|-------------|-------------|
| ENSGALG00010013246 | 0.736051026 | 0.229124712 |
| ENSGALG00010013247 | 0.278512197 | 0.029109271 |
| ENSGALG00010013248 | 0.671507657 | 0.205539897 |
| ENSGALG00010013249 | 0.928978543 | 0.231632983 |
| ENSGALG00010013250 | 0.8314366   | 0.150307902 |
| ENSGALG00010013251 | 0.770753794 | 0.055345886 |
| ENSGALG00010013252 | 0.957483237 | 0.254779086 |
| ENSGALG00010013253 | 0.659036718 | 0.266415328 |
| ENSGALG00010013254 | 0.884643102 | 0.265866148 |
| ENSGALG00010013256 | 0.462525453 | 0.417096582 |
| ENSGALG00010013257 | 0.925700124 | 0.30578776  |
| ENSGALG00010013258 | 0.969193198 | 0.250569655 |
| ENSGALG00010013259 | 0.77384115  | 0.158539683 |
| ENSGALG00010013260 | 0.781091693 | 0.296710153 |
| ENSGALG00010013261 | 0.114038241 | 0.142274536 |
| ENSGALG00010013262 | 0.564761658 | 0.100380263 |
| ENSGALG00010013263 | 0.567138491 | 0.535368281 |
| ENSGALG00010013264 | 0.73794176  | 0.280801012 |
| ENSGALG00010013265 | 0.988173026 | 0.347186177 |
| ENSGALG00010013266 | 0.714568125 | 0.300822113 |
| ENSGALG00010013267 | 0.584338218 | 0.25877026  |
| ENSGALG00010013268 | 0.269852975 | 0.090177272 |
| ENSGALG00010013269 | 0.849234942 | 0.321730533 |
| ENSGALG00010013271 | 0.971363874 | 0.332151975 |
| ENSGALG00010013272 | 0.169840649 | 0.372819642 |
| ENSGALG00010013273 | 0.573228346 | 0.009120614 |
| ENSGALG00010013274 | 0.33880764  | 0.065819685 |
| ENSGALG00010013275 | 0.958166082 | 0.316156038 |
| ENSGALG00010013276 | 0.904213529 | 0.159264279 |
| ENSGALG00010013277 | 0.419905985 | 0.356392381 |
| ENSGALG00010013278 | 0.912734752 | 0.30448006  |
| ENSGALG00010013280 | 0.838149021 | 0.37910399  |
| ENSGALG00010013281 | 0.254372136 | 0.084986156 |
| ENSGALG00010013282 | 0.90703278  | 0.430339494 |
| ENSGALG00010013283 | 0.956925139 | 0.278585679 |
| ENSGALG00010013284 | 0.746442053 | 0.248942741 |
| ENSGALG00010013285 | 0.945265931 | 0.236006693 |
| ENSGALG00010013286 | 0.98831562  | 0.322821924 |
| ENSGALG00010013287 | 0.586062417 | 0.31224614  |
| ENSGALG00010013288 | 0.947029882 | 0.203764447 |
| ENSGALG00010013289 | 0.915322245 | 0.350249485 |
| ENSGALG00010013290 | 0.967538657 | 0.314506179 |
| ENSGALG00010013292 | 0.963250955 | 0.343767905 |
| ENSGALG00010013293 | 0.793317709 | 0.349871775 |
| ENSGALG00010013294 | 0.477279458 | 0.248887179 |
| ENSGALG00010013295 | 0.919017107 | 0.275337699 |
| ENSGALG00010013296 | 0.679209494 | 0.280387331 |
| ENSGALG00010013297 | 0.952837126 | 0.32558232  |
| ENSGALG00010013298 | 0.241101206 | 0.002785488 |
| ENSGALG00010013299 | 0.814160164 | 0.389754697 |
| ENSGALG00010013300 | 0.571992562 | 0.185082298 |
| ENSGALG00010013301 | 0.174808906 | 0.29606967  |
| ENSGALG00010013302 | 0.90271931  | 0.377168776 |
| ENSGALG00010013303 | 0.805968631 | 0.334999426 |
| ENSGALG00010013304 | 0.618388544 | 0.006844153 |
| ENSGALG00010013305 | 0.960993185 | 0.385132691 |

|                    |             |             |
|--------------------|-------------|-------------|
| ENSGALG00010013306 | 0.967879144 | 0.417436979 |
| ENSGALG00010013307 | 0.943617214 | 0.217902823 |
| ENSGALG00010013308 | 0.262922434 | 0.138601464 |
| ENSGALG00010013309 | 0.984271661 | 0.33483391  |
| ENSGALG00010013310 | 0.747083524 | 0.089864788 |
| ENSGALG00010013311 | 0.633063259 | 0.380860974 |
| ENSGALG00010013312 | 0.98023071  | 0.369412974 |
| ENSGALG00010013313 | 0.9370202   | 0.21464178  |
| ENSGALG00010013314 | 0.640319965 | 0.331231268 |
| ENSGALG00010013315 | 0.8165783   | 0.387686241 |
| ENSGALG00010013316 | 0.484243242 | 0.243431008 |
| ENSGALG00010013317 | 0.858305245 | 0.185318596 |
| ENSGALG00010013318 | 0.508940577 | 0.176445915 |
| ENSGALG00010013319 | 0.240460951 | 0.020222045 |
| ENSGALG00010013320 | 0.933278983 | 0.357473663 |
| ENSGALG00010013321 | 0.008043983 | 0.110635211 |
| ENSGALG00010013322 | 0.323910544 | 0.136128073 |
| ENSGALG00010013323 | 0.606637975 | 0.022466053 |
| ENSGALG00010013324 | 0.825567408 | 0.104693723 |
| ENSGALG00010013325 | 0.969676045 | 0.337444786 |
| ENSGALG00010013327 | 0.834952501 | 0.030856014 |
| ENSGALG00010013328 | 0.868797633 | 0.305141863 |
| ENSGALG00010013329 | 0.452202018 | 0.263432322 |
| ENSGALG00010013330 | 0.844139814 | 0.163385685 |
| ENSGALG00010013331 | 0.180502179 | 0.111455836 |
| ENSGALG00010013332 | 0.820600463 | 0.475040776 |
| ENSGALG00010013333 | 0.422768985 | 0.414231063 |
| ENSGALG00010013334 | 0.193011454 | 0.300323358 |
| ENSGALG00010013335 | 0.991734943 | 0.31438837  |
| ENSGALG00010013336 | 0.399315634 | 0.170126231 |
| ENSGALG00010013337 | 0.948818743 | 0.319830269 |
| ENSGALG00010013339 | 0.241024924 | 0.087857425 |
| ENSGALG00010013340 | 0.042950378 | 0.119158415 |
| ENSGALG00010013341 | 0.222107324 | 0.165490218 |
| ENSGALG00010013342 | 0.754957766 | 0.278207527 |
| ENSGALG00010013343 | 0.76291645  | 0.114823774 |
| ENSGALG00010013344 | 0.920234413 | 0.204346682 |
| ENSGALG00010013345 | 0.438912388 | 0.163960374 |
| ENSGALG00010013346 | 0.990636738 | 0.342778235 |
| ENSGALG00010013347 | 0.597238867 | 0.016532654 |
| ENSGALG00010013348 | 0.760544084 | 0.014365077 |
| ENSGALG00010013349 | 0.842026211 | 0.220852909 |
| ENSGALG00010013351 | 0.123591786 | 0.155530229 |
| ENSGALG00010013352 | 0.832525453 | 0.341066876 |
| ENSGALG00010013353 | 0.281311598 | 0.096832751 |
| ENSGALG00010013354 | 0.978237876 | 0.29002466  |
| ENSGALG00010013355 | 0.851115432 | 0.291705194 |
| ENSGALG00010013356 | 0.236405177 | 0.364303255 |
| ENSGALG00010013357 | 0.765435801 | 0.391412403 |
| ENSGALG00010013358 | 0.820488445 | 0.274513987 |
| ENSGALG00010013359 | 0.536669509 | 0.206493997 |
| ENSGALG00010013360 | 0.423752321 | 0.012793047 |
| ENSGALG00010013361 | 0.135893973 | 0.150450603 |
| ENSGALG00010013362 | 0.802918176 | 0.422739897 |
| ENSGALG00010013363 | 0.978985086 | 0.258542128 |
| ENSGALG00010013364 | 0.453478428 | 0.066023984 |

|                    |             |             |
|--------------------|-------------|-------------|
| ENSGALG00010013365 | 0.986071565 | 0.346767345 |
| ENSGALG00010013367 | 0.351877136 | 0.23221238  |
| ENSGALG00010013369 | 0.948862512 | 0.285634459 |
| ENSGALG00010013370 | 0.931049935 | 0.231617044 |
| ENSGALG00010013371 | 0.271769152 | 0.440076841 |
| ENSGALG00010013372 | 0.69229792  | 0.130421389 |
| ENSGALG00010013373 | 0.184698419 | 0.179519181 |
| ENSGALG00010013374 | 0.945733669 | 0.28636718  |
| ENSGALG00010013375 | 0.848784727 | 0.228988019 |
| ENSGALG00010013376 | 0.694641595 | 0.010547628 |
| ENSGALG00010013377 | 0.696164718 | 0.13701595  |
| ENSGALG00010013378 | 0.388715732 | 0.4421999   |
| ENSGALG00010013379 | 0.743670625 | 0.330704496 |
| ENSGALG00010013380 | 0.986635857 | 0.327080832 |
| ENSGALG00010013381 | 0.288870458 | 0.091189751 |
| ENSGALG00010013382 | 0.985254247 | 0.315142748 |
| ENSGALG00010013383 | 0.944075685 | 0.236386228 |
| ENSGALG00010013385 | 0.969013936 | 0.309655748 |
| ENSGALG00010013386 | 0.973773249 | 0.239973996 |
| ENSGALG00010013387 | 0.178005602 | 0.341033526 |
| ENSGALG00010013388 | 0.885025163 | 0.23914153  |
| ENSGALG00010013389 | 0.434234727 | 0.003295498 |
| ENSGALG00010013390 | 0.983944973 | 0.350576928 |
| ENSGALG00010013391 | 0.650539331 | 0.040757933 |
| ENSGALG00010013392 | 0.749805707 | 0.304630512 |
| ENSGALG00010013393 | 0.815004174 | 0.208231805 |
| ENSGALG00010013394 | 0.359598781 | 0.229280128 |
| ENSGALG00010013395 | 0.875597493 | 0.305807856 |
| ENSGALG00010013396 | 0.984118739 | 0.399402825 |
| ENSGALG00010013397 | 0.539803971 | 0.062371104 |
| ENSGALG00010013398 | 0.957002566 | 0.320185847 |
| ENSGALG00010013399 | 0.961235149 | 0.34671248  |
| ENSGALG00010013400 | 0.515204355 | 0.058332602 |
| ENSGALG00010013401 | 0.134167114 | 0.295549581 |
| ENSGALG00010013402 | 0.268088855 | 0.093096726 |
| ENSGALG00010013403 | 0.649081346 | 0.512938285 |
| ENSGALG00010013404 | 0.512032584 | 0.081947435 |
| ENSGALG00010013405 | 0.696921871 | 0.241560726 |
| ENSGALG00010013407 | 0.984338788 | 0.313215144 |
| ENSGALG00010013408 | 0.588497287 | 0.07531384  |
| ENSGALG00010013409 | 0.904060959 | 0.348244023 |
| ENSGALG00010013410 | 0.639149559 | 0.04186644  |
| ENSGALG00010013411 | 0.330792121 | 0.275586713 |
| ENSGALG00010013412 | 0.18337826  | 0.122907007 |
| ENSGALG00010013413 | 0.568198393 | 0.287191062 |
| ENSGALG00010013414 | 0.981411796 | 0.331148379 |
| ENSGALG00010013416 | 0.921530742 | 0.298133028 |
| ENSGALG00010013417 | 0.976068247 | 0.260557553 |
| ENSGALG00010013418 | 0.262922434 | 0.138601464 |
| ENSGALG00010013419 | 0.936846776 | 0.207138513 |
| ENSGALG00010013422 | 0.547294606 | 0.184886278 |
| ENSGALG00010013423 | 0.623429205 | 0.299605744 |
| ENSGALG00010013427 | 0.328311737 | 0.228937941 |
| ENSGALG00010013428 | 0.996021046 | 0.330224944 |
| ENSGALG00010013429 | 0.995317844 | 0.319782381 |
| ENSGALG00010013431 | 0.90984141  | 0.141373613 |

|                    |             |             |
|--------------------|-------------|-------------|
| ENSGALG00010013434 | 0.59290471  | 0.266170684 |
| ENSGALG00010013435 | 0.923853845 | 0.404004899 |
| ENSGALG00010013436 | 0.852231429 | 0.286562245 |
| ENSGALG00010013438 | 0.873051806 | 0.288304988 |
| ENSGALG00010013440 | 0.480195756 | 0.052808496 |
| ENSGALG00010013442 | 0.578088603 | 0.011888647 |
| ENSGALG00010013444 | 0.89304037  | 0.375313843 |
| ENSGALG00010013445 | 0.738593172 | 0.204061191 |
| ENSGALG00010013446 | 0.927150562 | 0.336992293 |
| ENSGALG00010013449 | 0.544848113 | 0.349996674 |
| ENSGALG00010013450 | 0.850190808 | 0.199788783 |
| ENSGALG00010013451 | 0.995834288 | 0.336131194 |
| ENSGALG00010013452 | 0.959237256 | 0.280105807 |
| ENSGALG00010013453 | 0.400220827 | 0.320417892 |
| ENSGALG00010013455 | 0.765383297 | 0.235972944 |
| ENSGALG00010013457 | 0.991460687 | 0.327534002 |
| ENSGALG00010013458 | 0.977243734 | 0.362476139 |
| ENSGALG00010013459 | 0.990159943 | 0.351650065 |
| ENSGALG00010013461 | 0.36652196  | 0.331420743 |
| ENSGALG00010013463 | 0.975983671 | 0.348818988 |
| ENSGALG00010013464 | 0.962303449 | 0.410786926 |
| ENSGALG00010013465 | 0.768314592 | 0.109906416 |
| ENSGALG00010013466 | 0.946667784 | 0.335019493 |
| ENSGALG00010013468 | 0.590026697 | 0.080286296 |
| ENSGALG00010013470 | 0.745791344 | 0.257552699 |
| ENSGALG00010013471 | 0.055262695 | 0.13983149  |
| ENSGALG00010013472 | 0.970626979 | 0.302258729 |
| ENSGALG00010013476 | 0.916875846 | 0.473386762 |
| ENSGALG00010013477 | 0.855125268 | 0.217483473 |
| ENSGALG00010013480 | 0.193391989 | 0.193137629 |
| ENSGALG00010013482 | 0.947885514 | 0.190420877 |
| ENSGALG00010013483 | 0.211576192 | 0.519691433 |
| ENSGALG00010013484 | 0.461984661 | 0.10011435  |
| ENSGALG00010013486 | 0.930254891 | 0.271731727 |
| ENSGALG00010013487 | 0.8393986   | 0.186419299 |
| ENSGALG00010013488 | 0.505406403 | 0.087710092 |
| ENSGALG00010013491 | 0.970050524 | 0.371412432 |
| ENSGALG00010013492 | 0.965455549 | 0.457324921 |
| ENSGALG00010013493 | 0.604951726 | 0.113584932 |
| ENSGALG00010013494 | 0.983331714 | 0.323961738 |
| ENSGALG00010013497 | 0.705611646 | 0.17102537  |
| ENSGALG00010013498 | 0.922365608 | 0.202459475 |
| ENSGALG00010013499 | 0.365840833 | 0.116281684 |
| ENSGALG00010013501 | 0.593995261 | 0.574271617 |
| ENSGALG00010013502 | 0.846919396 | 0.263461541 |
| ENSGALG00010013504 | 0.992000952 | 0.334166044 |
| ENSGALG00010013506 | 0.916016999 | 0.272863388 |
| ENSGALG00010013508 | 0.687627232 | 0.399320342 |
| ENSGALG00010013509 | 0.90075034  | 0.188918237 |
| ENSGALG00010013510 | 0.905660754 | 0.272860862 |
| ENSGALG00010013511 | 0.90741628  | 0.413301943 |
| ENSGALG00010013514 | 0.950486658 | 0.197076667 |
| ENSGALG00010013515 | 0.800312508 | 0.15112995  |
| ENSGALG00010013516 | 0.032691858 | 0.028516063 |
| ENSGALG00010013517 | 0.451246798 | 0.269628386 |
| ENSGALG00010013520 | 0.708644999 | 0.258021366 |

|                    |             |             |
|--------------------|-------------|-------------|
| ENSGALG00010013521 | 0.285272007 | 0.109169955 |
| ENSGALG00010013522 | 0.956349943 | 0.182601946 |
| ENSGALG00010013523 | 0.120992588 | 0.016455751 |
| ENSGALG00010013524 | 0.735227674 | 0.28895601  |
| ENSGALG00010013526 | 0.781746106 | 0.060019751 |
| ENSGALG00010013527 | 0.087531075 | 0.288756603 |
| ENSGALG00010013528 | 0.813399725 | 0.227770221 |
| ENSGALG00010013529 | 0.75690815  | 0.334549675 |
| ENSGALG00010013530 | 0.99187316  | 0.24800033  |
| ENSGALG00010013531 | 0.117712394 | 0.565090935 |
| ENSGALG00010013532 | 0.236275731 | 0.137738166 |
| ENSGALG00010013533 | 0.595535074 | 0.060272568 |
| ENSGALG00010013537 | 0.391101935 | 0.432129674 |
| ENSGALG00010013538 | 0.624406287 | 0.195553325 |
| ENSGALG00010013539 | 0.970454686 | 0.42436581  |
| ENSGALG00010013541 | 0.31557269  | 0.39976646  |
| ENSGALG00010013544 | 0.219643828 | 0.187072219 |
| ENSGALG00010013546 | 0.96943687  | 0.379497766 |
| ENSGALG00010013548 | 0.510602098 | 0.088101245 |
| ENSGALG00010013549 | 0.938843967 | 0.277372067 |
| ENSGALG00010013550 | 0.945007956 | 0.169768886 |
| ENSGALG00010013551 | 0.957677762 | 0.291206566 |
| ENSGALG00010013552 | 0.952046711 | 0.423527036 |
| ENSGALG00010013553 | 0.847709701 | 0.072208535 |
| ENSGALG00010013555 | 0.385267219 | 0.242462386 |
| ENSGALG00010013556 | 0.578762219 | 0.220888407 |
| ENSGALG00010013557 | 0.606880617 | 0.227656784 |
| ENSGALG00010013558 | 0.542714762 | 0.060880498 |
| ENSGALG00010013560 | 0.565739386 | 0.167874974 |
| ENSGALG00010013561 | 0.960056687 | 0.326699093 |
| ENSGALG00010013562 | 0.393080833 | 0.386838195 |
| ENSGALG00010013563 | 0.980046352 | 0.372556471 |
| ENSGALG00010013564 | 0.277566769 | 0.107857127 |
| ENSGALG00010013566 | 0.332587279 | 0.522153151 |
| ENSGALG00010013567 | 0.359887877 | 0.14396678  |
| ENSGALG00010013568 | 0.09373728  | 0.650232439 |
| ENSGALG00010013569 | 0.369613871 | 0.180196378 |
| ENSGALG00010013570 | 0.019937434 | 0.451537925 |
| ENSGALG00010013571 | 0.154945677 | 0.222990059 |
| ENSGALG00010013572 | 0.964928935 | 0.430915467 |
| ENSGALG00010013573 | 0.453898094 | 0.295305384 |
| ENSGALG00010013574 | 0.961050579 | 0.292559254 |
| ENSGALG00010013575 | 0.558432172 | 0.198548276 |
| ENSGALG00010013576 | 0.985454928 | 0.348037623 |
| ENSGALG00010013577 | 0.048041984 | 0.111727973 |
| ENSGALG00010013578 | 0.258991126 | 0.176988502 |
| ENSGALG00010013579 | 0.381549186 | 0.357971457 |
| ENSGALG00010013580 | 0.417166272 | 0.023866057 |
| ENSGALG00010013581 | 0.200570274 | 0.091667991 |
| ENSGALG00010013582 | 0.946654513 | 0.271194803 |
| ENSGALG00010013583 | 0.85545351  | 0.048127849 |
| ENSGALG00010013584 | 0.744110623 | 0.11544466  |
| ENSGALG00010013585 | 0.572771993 | 0.48662517  |
| ENSGALG00010013586 | 0.218659563 | 0.138944896 |
| ENSGALG00010013587 | 0.864659703 | 0.296139467 |
| ENSGALG00010013588 | 0.026681103 | 0.120260695 |



|                    |             |             |
|--------------------|-------------|-------------|
| ENSGALG00010013589 | 0.519837246 | 0.233559392 |
| ENSGALG00010013592 | 0.546488069 | 0.058041499 |
| ENSGALG00010013595 | 0.785802957 | 0.32745819  |
| ENSGALG00010013596 | 0.962568532 | 0.421094246 |
| ENSGALG00010013598 | 0.151503384 | 0.033138894 |
| ENSGALG00010013601 | 0.061290856 | 0.4359714   |
| ENSGALG00010013602 | 0.504507995 | 0.124417137 |
| ENSGALG00010013603 | 0.395571797 | 0.097272276 |
| ENSGALG00010013604 | 0.792623815 | 0.256852828 |
| ENSGALG00010013609 | 0.958779395 | 0.37250109  |
| ENSGALG00010013610 | 0.203991683 | 0.058221925 |
| ENSGALG00010013612 | 0.15837725  | 0.349448279 |
| ENSGALG00010013613 | 0.157707479 | 0.408306698 |
| ENSGALG00010013614 | 0.846603534 | 0.320251118 |
| ENSGALG00010013617 | 0.436787766 | 0.519669277 |
| ENSGALG00010013619 | 0.914119021 | 0.287396991 |
| ENSGALG00010013621 | 0.948690026 | 0.382211684 |
| ENSGALG00010013622 | 0.647844934 | 0.06233081  |
| ENSGALG00010013624 | 0.090435602 | 0.117900952 |
| ENSGALG00010013625 | 0.95169563  | 0.309198981 |
| ENSGALG00010013626 | 0.918693343 | 0.299812048 |
| ENSGALG00010013627 | 0.945220291 | 0.254439643 |
| ENSGALG00010013631 | 0.432025504 | 0.268195458 |
| ENSGALG00010013632 | 0.273095654 | 0.612321109 |
| ENSGALG00010013634 | 0.064519051 | 0.143619078 |
| ENSGALG00010013635 | 0.87343009  | 0.406722416 |
| ENSGALG00010013638 | 0.727237639 | 0.230064779 |
| ENSGALG00010013639 | 0.822266772 | 0.224385324 |
| ENSGALG00010013640 | 0.666595483 | 0.389589126 |
| ENSGALG00010013644 | 0.386764803 | 0.105517621 |
| ENSGALG00010013645 | 0.512927448 | 0.046425159 |
| ENSGALG00010013646 | 0.97451788  | 0.332106901 |
| ENSGALG00010013647 | 0.586270318 | 0.186080162 |
| ENSGALG00010013648 | 0.894055385 | 0.323048644 |
| ENSGALG00010013650 | 0.973997479 | 0.339463056 |
| ENSGALG00010013651 | 0.930597696 | 0.365657356 |
| ENSGALG00010013654 | 0.111111925 | 0.065530994 |
| ENSGALG00010013657 | 0.984086515 | 0.283991738 |
| ENSGALG00010013661 | 0.275924968 | 0.400777609 |
| ENSGALG00010013662 | 0.739377655 | 0.229123623 |
| ENSGALG00010013663 | 0.869597515 | 0.436606669 |
| ENSGALG00010013664 | 0.917418216 | 0.357412538 |
| ENSGALG00010013665 | 0.282754916 | 0.323313762 |
| ENSGALG00010013666 | 0.909679047 | 0.313494703 |
| ENSGALG00010013667 | 0.982121101 | 0.257409809 |
| ENSGALG00010013668 | 0.160348444 | 0.041991657 |
| ENSGALG00010013669 | 0.934496672 | 0.259433564 |
| ENSGALG00010013670 | 0.295953409 | 0.537078435 |
| ENSGALG00010013671 | 0.786263542 | 0.286987032 |
| ENSGALG00010013672 | 0.990146904 | 0.326946331 |
| ENSGALG00010013674 | 0.142435963 | 0.414251631 |
| ENSGALG00010013675 | 0.390353249 | 0.133787383 |
| ENSGALG00010013676 | 0.924016505 | 0.294041359 |
| ENSGALG00010013677 | 0.372823977 | 0.113796518 |
| ENSGALG00010013678 | 0.161017956 | 0.126018193 |
| ENSGALG00010013679 | 0.941143983 | 0.343876204 |

|                    |             |             |
|--------------------|-------------|-------------|
| ENSGALG00010013682 | 0.747741256 | 0.242634981 |
| ENSGALG00010013683 | 0.21947649  | 0.06352501  |
| ENSGALG00010013684 | 0.032435623 | 0.168967782 |
| ENSGALG00010013686 | 0.957622955 | 0.310376202 |
| ENSGALG00010013687 | 0.497605585 | 0.404760238 |
| ENSGALG00010013690 | 0.949177965 | 0.26615348  |
| ENSGALG00010013694 | 0.318869103 | 0.609620979 |
| ENSGALG00010013696 | 0.879803256 | 0.105478536 |
| ENSGALG00010013697 | 0.689537223 | 0.457441822 |
| ENSGALG00010013698 | 0.009812001 | 0.5166245   |
| ENSGALG00010013699 | 0.561563494 | 0.011603035 |
| ENSGALG00010013701 | 0.083857975 | 0.104781578 |
| ENSGALG00010013703 | 0.285272007 | 0.109169955 |
| ENSGALG00010013704 | 0.925119803 | 0.414305052 |
| ENSGALG00010013709 | 0.910994859 | 0.182564089 |
| ENSGALG00010013715 | 0.991763449 | 0.341968453 |
| ENSGALG00010013717 | 0.847450886 | 0.263346901 |
| ENSGALG00010013719 | 0.726484678 | 0.017701755 |
| ENSGALG00010013720 | 0.168879283 | 0.316894473 |
| ENSGALG00010013726 | 0.395556858 | 0.102965232 |
| ENSGALG00010013731 | 0.03285381  | 0.446229691 |
| ENSGALG00010013732 | 0.913206924 | 0.234408802 |
| ENSGALG00010013733 | 0.371974189 | 0.241517246 |
| ENSGALG00010013735 | 0.380776272 | 0.137181361 |
| ENSGALG00010013736 | 0.010611957 | 0.150966622 |
| ENSGALG00010013737 | 0.457714007 | 0.21586017  |
| ENSGALG00010013740 | 0.974772492 | 0.31441662  |
| ENSGALG00010013743 | 0.299001104 | 0.0947825   |
| ENSGALG00010013744 | 0.983602185 | 0.312783132 |
| ENSGALG00010013746 | 0.95144781  | 0.395448056 |
| ENSGALG00010013747 | 0.597790263 | 0.24194292  |
| ENSGALG00010013748 | 0.38788653  | 0.126003537 |
| ENSGALG00010013749 | 0.970831006 | 0.315107312 |
| ENSGALG00010013750 | 0.348639952 | 0.546231234 |
| ENSGALG00010013751 | 0.037121486 | 0.150390551 |
| ENSGALG00010013752 | 0.77476991  | 0.257452719 |
| ENSGALG00010013753 | 0.601284874 | 0.10793913  |
| ENSGALG00010013755 | 0.838072383 | 0.298443643 |
| ENSGALG00010013756 | 0.499060521 | 0.489254519 |
| ENSGALG00010013757 | 0.467122895 | 0.162310228 |
| ENSGALG00010013758 | 0.227348537 | 0.294045536 |
| ENSGALG00010013760 | 0.77205514  | 0.429771904 |
| ENSGALG00010013761 | 0.531532005 | 0.388828337 |
| ENSGALG00010013762 | 0.385056955 | 0.359188973 |
| ENSGALG00010013763 | 0.812442893 | 0.299046875 |
| ENSGALG00010013764 | 0.643253246 | 0.22844101  |
| ENSGALG00010013766 | 0.481973279 | 0.284703424 |
| ENSGALG00010013767 | 0.996667246 | 0.331019589 |
| ENSGALG00010013768 | 0.032543023 | 0.182103637 |
| ENSGALG00010013769 | 0.285272007 | 0.109169955 |
| ENSGALG00010013770 | 0.499571562 | 0.142812618 |
| ENSGALG00010013771 | 0.90444041  | 0.35087352  |
| ENSGALG00010013772 | 0.164111485 | 0.004667785 |
| ENSGALG00010013774 | 0.299628493 | 0.000976957 |
| ENSGALG00010013775 | 0.653901762 | 0.436746947 |
| ENSGALG00010013776 | 0.285272007 | 0.109169955 |

|                    |             |             |
|--------------------|-------------|-------------|
| ENSGALG00010013777 | 0.755569935 | 0.456634143 |
| ENSGALG00010013779 | 0.786661964 | 0.461026277 |
| ENSGALG00010013780 | 0.460544355 | 0.045077074 |
| ENSGALG00010013782 | 0.198733304 | 0.184433    |
| ENSGALG00010013783 | 0.743857499 | 0.238734394 |
| ENSGALG00010013784 | 0.989626842 | 0.32435863  |
| ENSGALG00010013785 | 0.271989419 | 0.229446651 |
| ENSGALG00010013786 | 0.939409883 | 0.315949299 |
| ENSGALG00010013787 | 0.622325889 | 0.020749161 |
| ENSGALG00010013791 | 0.904010303 | 0.5425723   |
| ENSGALG00010013792 | 0.667828704 | 0.016206113 |
| ENSGALG00010013793 | 0.543574397 | 0.215933744 |
| ENSGALG00010013794 | 0.809378863 | 0.218969749 |
| ENSGALG00010013797 | 0.921293091 | 0.122685227 |
| ENSGALG00010013798 | 0.029588435 | 0.156172859 |
| ENSGALG00010013799 | 0.153015721 | 0.064444297 |
| ENSGALG00010013802 | 0.913379685 | 0.266725828 |
| ENSGALG00010013804 | 0.725703624 | 0.259769833 |
| ENSGALG00010013805 | 0.965178541 | 0.251623384 |
| ENSGALG00010013808 | 0.840526324 | 0.265187266 |
| ENSGALG00010013809 | 0.905512889 | 0.394176216 |
| ENSGALG00010013814 | 0.130389581 | 0.042150117 |
| ENSGALG00010013815 | 0.698145499 | 0.045479984 |
| ENSGALG00010013820 | 0.988069971 | 0.341796837 |
| ENSGALG00010013821 | 0.468461797 | 0.141158848 |
| ENSGALG00010013822 | 0.012433676 | 0.134633327 |
| ENSGALG00010013823 | 0.698037015 | 0.380001634 |
| ENSGALG00010013824 | 0.987777369 | 0.334402072 |
| ENSGALG00010013825 | 0.320558359 | 0.423674672 |
| ENSGALG00010013827 | 0.287464551 | 0.092296281 |
| ENSGALG00010013828 | 0.605812928 | 0.126593548 |
| ENSGALG00010013830 | 0.398160448 | 0.061610243 |
| ENSGALG00010013831 | 0.618776683 | 0.041117296 |
| ENSGALG00010013833 | 0.942442796 | 0.332560192 |
| ENSGALG00010013836 | 0.894432428 | 0.468321096 |
| ENSGALG00010013837 | 0.90277529  | 0.405154734 |
| ENSGALG00010013840 | 0.373495264 | 0.061911944 |
| ENSGALG00010013842 | 0.49337701  | 0.166302469 |
| ENSGALG00010013845 | 0.086518717 | 0.120092976 |
| ENSGALG00010013846 | 0.997557358 | 0.327833353 |
| ENSGALG00010013848 | 0.144349412 | 0.069889765 |
| ENSGALG00010013850 | 0.270451009 | 0.090541667 |
| ENSGALG00010013857 | 0.840804776 | 0.240806656 |
| ENSGALG00010013859 | 0.967550547 | 0.246937141 |
| ENSGALG00010013861 | 0.977361302 | 0.327394368 |
| ENSGALG00010013862 | 0.200570274 | 0.091667991 |
| ENSGALG00010013865 | 0.520697792 | 0.375173109 |
| ENSGALG00010013866 | 0.273085453 | 0.040064011 |
| ENSGALG00010013867 | 0.187706647 | 0.090890223 |
| ENSGALG00010013871 | 0.745827762 | 0.171008672 |
| ENSGALG00010013872 | 0.880574865 | 0.410231229 |
| ENSGALG00010013874 | 0.187514554 | 0.108479243 |
| ENSGALG00010013878 | 0.721614541 | 0.267707382 |
| ENSGALG00010013879 | 0.344386169 | 0.246957469 |
| ENSGALG00010013880 | 0.026713547 | 0.440572191 |
| ENSGALG00010013886 | 0.528210503 | 0.354331696 |

|                    |             |             |
|--------------------|-------------|-------------|
| ENSGALG00010013889 | 0.943860404 | 0.188740659 |
| ENSGALG00010013890 | 0.857091038 | 0.275592677 |
| ENSGALG00010013891 | 0.187514554 | 0.108479243 |
| ENSGALG00010013893 | 0.930194992 | 0.296163237 |
| ENSGALG00010013894 | 0.265558089 | 0.028821141 |
| ENSGALG00010013897 | 0.218454689 | 0.027994195 |
| ENSGALG00010013898 | 0.722343072 | 0.363440446 |
| ENSGALG00010013899 | 0.942734143 | 0.282773125 |
| ENSGALG00010013900 | 0.238171268 | 0.174690323 |
| ENSGALG00010013901 | 0.214623807 | 0.071091285 |
| ENSGALG00010013905 | 0.93197314  | 0.211596303 |
| ENSGALG00010013907 | 0.960423541 | 0.205321367 |
| ENSGALG00010013908 | 0.951726467 | 0.341001395 |
| ENSGALG00010013909 | 0.219386918 | 0.079388121 |
| ENSGALG00010013910 | 0.883827048 | 0.564157862 |
| ENSGALG00010013911 | 0.979812181 | 0.311409148 |
| ENSGALG00010013912 | 0.689274242 | 0.123958412 |
| ENSGALG00010013914 | 0.942132216 | 0.392583526 |
| ENSGALG00010013915 | 0.706728676 | 0.300830668 |
| ENSGALG00010013916 | 0.208032856 | 0.119983309 |
| ENSGALG00010013917 | 0.785689838 | 0.266897263 |
| ENSGALG00010013920 | 0.146908091 | 0.084521517 |
| ENSGALG00010013921 | 0.687659961 | 0.450778591 |
| ENSGALG00010013923 | 0.773479957 | 0.411694308 |
| ENSGALG00010013925 | 0.373495264 | 0.061911944 |
| ENSGALG00010013926 | 0.494010744 | 0.129594124 |
| ENSGALG00010013928 | 0.827477335 | 0.439476647 |
| ENSGALG00010013929 | 0.696108161 | 0.225134489 |
| ENSGALG00010013930 | 0.369634494 | 0.073969895 |
| ENSGALG00010013933 | 0.270451009 | 0.090541667 |
| ENSGALG00010013934 | 0.859713736 | 0.342429904 |
| ENSGALG00010013935 | 0.107987641 | 0.147761113 |
| ENSGALG00010013936 | 0.358447787 | 0.13566212  |
| ENSGALG00010013938 | 0.737489006 | 0.364490838 |
| ENSGALG00010013940 | 0.796899393 | 0.018392452 |
| ENSGALG00010013942 | 0.574880954 | 0.323891812 |
| ENSGALG00010013943 | 0.087780444 | 0.120365176 |
| ENSGALG00010013944 | 0.341871658 | 0.269119022 |
| ENSGALG00010013945 | 0.866664831 | 0.478281357 |
| ENSGALG00010013946 | 0.606983821 | 0.049321487 |
| ENSGALG00010013947 | 0.931966258 | 0.20394417  |
| ENSGALG00010013948 | 0.328685149 | 0.093645012 |
| ENSGALG00010013949 | 0.672740672 | 0.024936331 |
| ENSGALG00010013950 | 0.983298438 | 0.269302938 |
| ENSGALG00010013952 | 0.353859546 | 0.637304418 |
| ENSGALG00010013953 | 0.930707748 | 0.302447364 |
| ENSGALG00010013954 | 0.136776981 | 0.248452392 |
| ENSGALG00010013955 | 0.069382794 | 0.113339801 |
| ENSGALG00010013956 | 0.421905141 | 0.198786386 |
| ENSGALG00010013957 | 0.763395204 | 0.034348022 |
| ENSGALG00010013958 | 0.836328304 | 0.218289668 |
| ENSGALG00010013959 | 0.720195442 | 0.343279464 |
| ENSGALG00010013961 | 0.708584806 | 0.197433803 |
| ENSGALG00010013962 | 0.475630301 | 0.154026102 |
| ENSGALG00010013964 | 0.853560193 | 0.233025825 |
| ENSGALG00010013965 | 0.997368553 | 0.351183696 |

|                    |             |             |
|--------------------|-------------|-------------|
| ENSGALG00010013966 | 0.278703818 | 0.125726279 |
| ENSGALG00010013967 | 0.892296343 | 0.260098029 |
| ENSGALG00010013971 | 0.451006588 | 0.564375683 |
| ENSGALG00010013973 | 0.654825081 | 0.351075371 |
| ENSGALG00010013974 | 0.83915247  | 0.240757106 |
| ENSGALG00010013976 | 0.676238859 | 0.030912704 |
| ENSGALG00010013977 | 0.932130163 | 0.236276642 |
| ENSGALG00010013978 | 0.145055926 | 0.013843908 |
| ENSGALG00010013980 | 0.930447073 | 0.334270985 |
| ENSGALG00010013981 | 0.261110229 | 0.186982836 |
| ENSGALG00010013983 | 0.399574883 | 0.154317703 |
| ENSGALG00010013986 | 0.55440542  | 0.010500745 |
| ENSGALG00010013987 | 0.304747817 | 0.1487839   |
| ENSGALG00010013988 | 0.852396147 | 0.242072812 |
| ENSGALG00010013989 | 0.989028633 | 0.36840103  |
| ENSGALG00010013990 | 0.007835704 | 0.185941901 |
| ENSGALG00010013994 | 0.996566369 | 0.334684829 |
| ENSGALG00010013995 | 0.90130388  | 0.481342309 |
| ENSGALG00010013997 | 0.481505139 | 0.158115463 |
| ENSGALG00010013998 | 0.312583512 | 0.102254388 |
| ENSGALG00010013999 | 0.588330132 | 0.229581084 |
| ENSGALG00010014000 | 0.964317092 | 0.284558921 |
| ENSGALG00010014001 | 0.480596437 | 0.174483453 |
| ENSGALG00010014002 | 0.292940174 | 0.076530023 |
| ENSGALG00010014006 | 0.342357985 | 0.068737211 |
| ENSGALG00010014007 | 0.649616476 | 0.208647266 |
| ENSGALG00010014008 | 0.65366567  | 0.191188874 |
| ENSGALG00010014009 | 0.30413662  | 0.447810957 |
| ENSGALG00010014010 | 0.731643439 | 0.195138168 |
| ENSGALG00010014011 | 0.377890827 | 0.365773022 |
| ENSGALG00010014012 | 0.270451009 | 0.090541667 |
| ENSGALG00010014014 | 0.924671056 | 0.276923492 |
| ENSGALG00010014018 | 0.193412258 | 0.369574011 |
| ENSGALG00010014019 | 0.892205455 | 0.262692248 |
| ENSGALG00010014020 | 0.747963378 | 0.285676854 |
| ENSGALG00010014025 | 0.24274624  | 0.253601774 |
| ENSGALG00010014026 | 0.891049452 | 0.198318882 |
| ENSGALG00010014027 | 0.298143852 | 0.421988187 |
| ENSGALG00010014029 | 0.82080503  | 0.284537061 |
| ENSGALG00010014030 | 0.559736096 | 0.287396892 |
| ENSGALG00010014031 | 0.837368865 | 0.258666511 |
| ENSGALG00010014032 | 0.740852737 | 0.282989685 |
| ENSGALG00010014033 | 0.969983245 | 0.304022841 |
| ENSGALG00010014035 | 0.340139149 | 0.036533269 |
| ENSGALG00010014036 | 0.468227249 | 0.169945428 |
| ENSGALG00010014038 | 0.089464534 | 0.206635869 |
| ENSGALG00010014039 | 0.812798795 | 0.340329734 |
| ENSGALG00010014041 | 0.705519384 | 0.161407197 |
| ENSGALG00010014042 | 0.09497156  | 0.359844284 |
| ENSGALG00010014043 | 0.302402586 | 0.196026891 |
| ENSGALG00010014044 | 0.119086826 | 0.279869788 |
| ENSGALG00010014045 | 0.115923141 | 0.407160789 |
| ENSGALG00010014047 | 0.407959512 | 0.105837954 |
| ENSGALG00010014048 | 0.532040899 | 0.37115439  |
| ENSGALG00010014049 | 0.340584432 | 0.170258254 |
| ENSGALG00010014051 | 0.340670265 | 0.238948705 |

|                    |             |             |
|--------------------|-------------|-------------|
| ENSGALG00010014054 | 0.041527275 | 0.149390608 |
| ENSGALG00010014055 | 0.852780713 | 0.180072666 |
| ENSGALG00010014056 | 0.965434976 | 0.289848244 |
| ENSGALG00010014058 | 0.569107953 | 0.277350009 |
| ENSGALG00010014059 | 0.994972309 | 0.324823455 |
| ENSGALG00010014060 | 0.958831416 | 0.291571603 |
| ENSGALG00010014062 | 0.735661139 | 0.370191547 |
| ENSGALG00010014063 | 0.751774242 | 0.28796075  |
| ENSGALG00010014065 | 0.328035799 | 0.206249319 |
| ENSGALG00010014066 | 0.29320785  | 0.140482424 |
| ENSGALG00010014068 | 0.262922434 | 0.138601464 |
| ENSGALG00010014072 | 0.358544312 | 0.204272193 |
| ENSGALG00010014075 | 0.937530483 | 0.21226278  |
| ENSGALG00010014076 | 0.944414301 | 0.237912934 |
| ENSGALG00010014077 | 0.912144876 | 0.424814771 |
| ENSGALG00010014078 | 0.049403311 | 0.0583384   |
| ENSGALG00010014080 | 0.964373872 | 0.322910535 |
| ENSGALG00010014082 | 0.235422516 | 0.209705908 |
| ENSGALG00010014083 | 0.979981812 | 0.297224745 |
| ENSGALG00010014084 | 0.486568715 | 0.11129954  |
| ENSGALG00010014087 | 0.082904719 | 0.393537098 |
| ENSGALG00010014088 | 0.474269956 | 0.285754823 |
| ENSGALG00010014089 | 0.687642386 | 0.183802503 |
| ENSGALG00010014091 | 0.853032489 | 0.563795065 |
| ENSGALG00010014093 | 0.961868741 | 0.29542091  |
| ENSGALG00010014096 | 0.870770821 | 0.261078592 |
| ENSGALG00010014097 | 0.745898831 | 0.397316154 |
| ENSGALG00010014098 | 0.615773939 | 0.24853195  |
| ENSGALG00010014099 | 0.791067711 | 0.262161769 |
| ENSGALG00010014100 | 0.151370447 | 0.54048483  |
| ENSGALG00010014101 | 0.324552403 | 0.130497611 |
| ENSGALG00010014102 | 0.909653782 | 0.198977341 |
| ENSGALG00010014103 | 0.566182883 | 0.14509737  |
| ENSGALG00010014104 | 0.92087764  | 0.347416547 |
| ENSGALG00010014105 | 0.920546662 | 0.200616127 |
| ENSGALG00010014106 | 0.727569307 | 0.221382857 |
| ENSGALG00010014107 | 0.954413084 | 0.330941588 |
| ENSGALG00010014108 | 0.21070135  | 0.264960944 |
| ENSGALG00010014109 | 0.814157166 | 0.032955816 |
| ENSGALG00010014111 | 0.674965418 | 0.232913318 |
| ENSGALG00010014113 | 0.168472759 | 0.276926583 |
| ENSGALG00010014114 | 0.220304737 | 0.409433552 |
| ENSGALG00010014116 | 0.266137114 | 0.107784983 |
| ENSGALG00010014117 | 0.457016091 | 0.246692557 |
| ENSGALG00010014118 | 0.146948216 | 0.14253776  |
| ENSGALG00010014119 | 0.380566514 | 0.146304741 |
| ENSGALG00010014120 | 0.938455334 | 0.264884559 |
| ENSGALG00010014121 | 0.257273775 | 0.161918836 |
| ENSGALG00010014122 | 0.980764263 | 0.399191633 |
| ENSGALG00010014123 | 0.208550923 | 0.676301294 |
| ENSGALG00010014124 | 0.451725267 | 0.106305896 |
| ENSGALG00010014125 | 0.63957699  | 0.277376339 |
| ENSGALG00010014126 | 0.189240572 | 0.04996112  |
| ENSGALG00010014128 | 0.896116636 | 0.468248265 |
| ENSGALG00010014129 | 0.84478614  | 0.388149137 |
| ENSGALG00010014131 | 0.091145172 | 0.310694237 |

|                    |             |             |
|--------------------|-------------|-------------|
| ENSGALG00010014134 | 0.617873611 | 0.026101576 |
| ENSGALG00010014135 | 0.821590185 | 0.100826204 |
| ENSGALG00010014138 | 0.557737279 | 0.097429904 |
| ENSGALG00010014141 | 0.949419029 | 0.277179541 |
| ENSGALG00010014142 | 0.522487296 | 0.192957245 |
| ENSGALG00010014143 | 0.877109859 | 0.218609649 |
| ENSGALG00010014144 | 0.340801247 | 0.000665337 |
| ENSGALG00010014145 | 0.986724161 | 0.297727634 |
| ENSGALG00010014146 | 0.584614581 | 0.193877131 |
| ENSGALG00010014147 | 0.958821433 | 0.417788539 |
| ENSGALG00010014148 | 0.08243109  | 0.117800123 |
| ENSGALG00010014149 | 0.739038418 | 0.2799028   |
| ENSGALG00010014151 | 0.108712892 | 0.093423115 |
| ENSGALG00010014152 | 0.105365755 | 0.060065943 |
| ENSGALG00010014153 | 0.968584081 | 0.259364173 |
| ENSGALG00010014154 | 0.269247659 | 0.33106059  |
| ENSGALG00010014156 | 0.964359668 | 0.419783935 |
| ENSGALG00010014159 | 0.970808861 | 0.261693794 |
| ENSGALG00010014160 | 0.576896426 | 0.190754842 |
| ENSGALG00010014161 | 0.992778555 | 0.283577451 |
| ENSGALG00010014162 | 0.661729179 | 0.535101888 |
| ENSGALG00010014164 | 0.594777423 | 0.066226025 |
| ENSGALG00010014165 | 0.88255285  | 0.055622578 |
| ENSGALG00010014166 | 0.880793116 | 0.392428155 |
| ENSGALG00010014167 | 0.881186804 | 0.399774057 |
| ENSGALG00010014168 | 0.050564    | 0.120729262 |
| ENSGALG00010014170 | 0.956623469 | 0.315571086 |
| ENSGALG00010014171 | 0.370605838 | 0.107055239 |
| ENSGALG00010014173 | 0.790019311 | 0.145714742 |
| ENSGALG00010014174 | 0.447884878 | 0.204822895 |
| ENSGALG00010014175 | 0.09541223  | 0.193385441 |
| ENSGALG00010014176 | 0.737131464 | 0.296292271 |
| ENSGALG00010014178 | 0.165105364 | 0.035305462 |
| ENSGALG00010014179 | 0.943586691 | 0.43165578  |
| ENSGALG00010014180 | 0.865670912 | 0.239276496 |
| ENSGALG00010014183 | 0.512682274 | 0.14693857  |
| ENSGALG00010014184 | 0.780980347 | 0.090639473 |
| ENSGALG00010014185 | 0.187514554 | 0.108479243 |
| ENSGALG00010014186 | 0.913151264 | 0.281820651 |
| ENSGALG00010014187 | 0.844393789 | 0.284301402 |
| ENSGALG00010014189 | 0.843055702 | 0.298346242 |
| ENSGALG00010014190 | 0.51980741  | 0.137516637 |
| ENSGALG00010014192 | 0.962181147 | 0.438443769 |
| ENSGALG00010014193 | 0.925231103 | 0.315364637 |
| ENSGALG00010014194 | 0.905870236 | 0.377915412 |
| ENSGALG00010014197 | 0.400115622 | 0.5833757   |
| ENSGALG00010014198 | 0.916736894 | 0.349009706 |
| ENSGALG00010014199 | 0.549197148 | 0.230735307 |
| ENSGALG00010014200 | 0.925070735 | 0.380054917 |
| ENSGALG00010014201 | 0.37826817  | 0.194088878 |
| ENSGALG00010014203 | 0.781193573 | 0.274152156 |
| ENSGALG00010014204 | 0.936344789 | 0.328911778 |
| ENSGALG00010014205 | 0.817195334 | 0.436565329 |
| ENSGALG00010014207 | 0.013536418 | 0.091863354 |
| ENSGALG00010014208 | 0.152894494 | 0.161114014 |
| ENSGALG00010014209 | 0.933144695 | 0.268752591 |

|                    |             |             |
|--------------------|-------------|-------------|
| ENSGALG00010014210 | 0.778199793 | 0.173762651 |
| ENSGALG00010014211 | 0.000308962 | 0.089704914 |
| ENSGALG00010014212 | 0.445249393 | 0.16502204  |
| ENSGALG00010014213 | 0.013869109 | 0.267352086 |
| ENSGALG00010014214 | 0.887792879 | 0.397875443 |
| ENSGALG00010014217 | 0.951458977 | 0.346064008 |
| ENSGALG00010014218 | 0.961446345 | 0.26918267  |
| ENSGALG00010014219 | 0.769405642 | 0.395876376 |
| ENSGALG00010014220 | 0.737659476 | 0.12372338  |
| ENSGALG00010014221 | 0.977112101 | 0.300001146 |
| ENSGALG00010014222 | 0.587330449 | 0.233110691 |
| ENSGALG00010014223 | 0.021308589 | 0.164876077 |
| ENSGALG00010014225 | 0.957325305 | 0.275758221 |
| ENSGALG00010014226 | 0.717272205 | 0.229440539 |
| ENSGALG00010014227 | 0.402335153 | 0.130211642 |
| ENSGALG00010014228 | 0.770149738 | 0.546198356 |
| ENSGALG00010014231 | 0.389527696 | 0.134775807 |
| ENSGALG00010014234 | 0.109585598 | 0.034886346 |
| ENSGALG00010014236 | 0.919941272 | 0.372958552 |
| ENSGALG00010014238 | 0.907296712 | 0.221660232 |
| ENSGALG00010014239 | 0.659651963 | 0.320015725 |
| ENSGALG00010014240 | 0.834083122 | 0.335733246 |
| ENSGALG00010014241 | 0.331557977 | 0.134316672 |
| ENSGALG00010014242 | 0.33395213  | 0.127251842 |
| ENSGALG00010014243 | 0.878712731 | 0.367873513 |
| ENSGALG00010014244 | 0.164622994 | 0.009982049 |
| ENSGALG00010014246 | 0.954666221 | 0.245965748 |
| ENSGALG00010014247 | 0.635555926 | 0.584670794 |
| ENSGALG00010014249 | 0.263659311 | 0.298696155 |
| ENSGALG00010014250 | 0.987016593 | 0.337985079 |
| ENSGALG00010014251 | 0.924176335 | 0.245894669 |
| ENSGALG00010014252 | 0.303942447 | 0.152546132 |
| ENSGALG00010014253 | 0.213479858 | 0.113179908 |
| ENSGALG00010014254 | 0.627119917 | 0.171454281 |
| ENSGALG00010014255 | 0.262922434 | 0.138601464 |
| ENSGALG00010014256 | 0.383574131 | 0.156814206 |
| ENSGALG00010014257 | 0.789860609 | 0.40825721  |
| ENSGALG00010014258 | 0.899722258 | 0.402228758 |
| ENSGALG00010014259 | 0.575725752 | 0.196837869 |
| ENSGALG00010014260 | 0.904945394 | 0.400654841 |
| ENSGALG00010014262 | 0.05369475  | 0.27839414  |
| ENSGALG00010014263 | 0.856540233 | 0.303201577 |
| ENSGALG00010014264 | 0.317468071 | 0.452961925 |
| ENSGALG00010014265 | 0.947633081 | 0.391406068 |
| ENSGALG00010014267 | 0.96931838  | 0.240713582 |
| ENSGALG00010014268 | 0.274586994 | 0.115798603 |
| ENSGALG00010014269 | 0.62992468  | 0.087690192 |
| ENSGALG00010014272 | 0.954349378 | 0.398697284 |
| ENSGALG00010014274 | 0.970370297 | 0.274766279 |
| ENSGALG00010014275 | 0.379098883 | 0.108694718 |
| ENSGALG00010014278 | 0.94688458  | 0.22475319  |
| ENSGALG00010014279 | 0.216433634 | 0.680598293 |
| ENSGALG00010014280 | 0.092255142 | 0.172283884 |
| ENSGALG00010014281 | 0.265558089 | 0.028821141 |
| ENSGALG00010014284 | 0.940677266 | 0.351176289 |
| ENSGALG00010014288 | 0.106461845 | 0.069042996 |



|                    |             |             |
|--------------------|-------------|-------------|
| ENSGALG00010014289 | 0.189240572 | 0.04996112  |
| ENSGALG00010014291 | 0.353836011 | 0.142492185 |
| ENSGALG00010014292 | 0.989748756 | 0.36309724  |
| ENSGALG00010014293 | 0.730426667 | 0.25080918  |
| ENSGALG00010014294 | 0.963037256 | 0.207074525 |
| ENSGALG00010014295 | 0.648783981 | 0.135770435 |
| ENSGALG00010014296 | 0.271701261 | 0.072417625 |
| ENSGALG00010014298 | 0.984133585 | 0.346870309 |
| ENSGALG00010014299 | 0.357294364 | 0.231549923 |
| ENSGALG00010014300 | 0.201228432 | 0.47630071  |
| ENSGALG00010014301 | 0.014909801 | 0.409709874 |
| ENSGALG00010014302 | 0.914311986 | 0.345610592 |
| ENSGALG00010014303 | 0.664158336 | 0.018751445 |
| ENSGALG00010014305 | 0.927879008 | 0.365212205 |
| ENSGALG00010014306 | 0.330774772 | 0.071450258 |
| ENSGALG00010014307 | 0.475286975 | 0.718054333 |
| ENSGALG00010014308 | 0.988357455 | 0.335865016 |
| ENSGALG00010014309 | 0.186983517 | 0.258736575 |
| ENSGALG00010014310 | 0.902787881 | 0.431506485 |
| ENSGALG00010014312 | 0.869043945 | 0.299173039 |
| ENSGALG00010014313 | 0.405253286 | 0.198417883 |
| ENSGALG00010014314 | 0.612145091 | 0.102158057 |
| ENSGALG00010014315 | 0.568431257 | 0.164095031 |
| ENSGALG00010014317 | 0.949837322 | 0.252640046 |
| ENSGALG00010014318 | 0.500756293 | 0.166557333 |
| ENSGALG00010014319 | 0.088502897 | 0.082693322 |
| ENSGALG00010014321 | 0.43802847  | 0.100203833 |
| ENSGALG00010014322 | 0.575960811 | 0.16622708  |
| ENSGALG00010014323 | 0.052476357 | 0.012009645 |
| ENSGALG00010014324 | 0.93920864  | 0.436807918 |
| ENSGALG00010014325 | 0.993698749 | 0.293952253 |
| ENSGALG00010014328 | 0.003244989 | 0.058799645 |
| ENSGALG00010014329 | 0.825905283 | 0.273980789 |
| ENSGALG00010014330 | 0.191008478 | 0.35294258  |
| ENSGALG00010014331 | 0.11820192  | 0.376084061 |
| ENSGALG00010014332 | 0.488197751 | 0.067780538 |
| ENSGALG00010014334 | 0.99460707  | 0.309437398 |
| ENSGALG00010014338 | 0.901848899 | 0.295384369 |
| ENSGALG00010014340 | 0.988121187 | 0.371161853 |
| ENSGALG00010014344 | 0.764875859 | 0.001268942 |
| ENSGALG00010014345 | 0.211938898 | 0.202044544 |
| ENSGALG00010014346 | 0.951332065 | 0.252267748 |
| ENSGALG00010014347 | 0.924332302 | 0.281181817 |
| ENSGALG00010014349 | 0.851164938 | 0.495144126 |
| ENSGALG00010014350 | 0.860346665 | 0.194272472 |
| ENSGALG00010014353 | 0.053932482 | 0.023179231 |
| ENSGALG00010014354 | 0.38867361  | 0.120775313 |
| ENSGALG00010014355 | 0.889447152 | 0.279733017 |
| ENSGALG00010014357 | 0.646546643 | 0.179753833 |
| ENSGALG00010014358 | 0.841619722 | 0.266417516 |
| ENSGALG00010014359 | 0.367039333 | 0.024038032 |
| ENSGALG00010014360 | 0.275889746 | 0.27880894  |
| ENSGALG00010014361 | 0.989573676 | 0.341553348 |
| ENSGALG00010014362 | 0.86970055  | 0.26989594  |
| ENSGALG00010014363 | 0.404461533 | 0.134346384 |
| ENSGALG00010014365 | 0.011589493 | 0.110944875 |

|                    |             |             |
|--------------------|-------------|-------------|
| ENSGALG00010014366 | 0.399597297 | 0.32533074  |
| ENSGALG00010014367 | 0.67631596  | 0.401993513 |
| ENSGALG00010014371 | 0.680958646 | 0.294541161 |
| ENSGALG00010014372 | 0.178487054 | 0.312532566 |
| ENSGALG00010014373 | 0.068328869 | 0.299916391 |
| ENSGALG00010014374 | 0.544430491 | 0.223906011 |
| ENSGALG00010014375 | 0.93703569  | 0.337447497 |
| ENSGALG00010014376 | 0.104955345 | 0.220055655 |
| ENSGALG00010014379 | 0.952410002 | 0.390769754 |
| ENSGALG00010014380 | 0.988647081 | 0.306347345 |
| ENSGALG00010014381 | 0.465409998 | 0.152535495 |
| ENSGALG00010014385 | 0.003593231 | 0.494852331 |
| ENSGALG00010014387 | 0.310769897 | 0.373922399 |
| ENSGALG00010014388 | 0.849559483 | 0.182371452 |
| ENSGALG00010014389 | 0.694398428 | 0.430816154 |
| ENSGALG00010014390 | 0.946568283 | 0.402175398 |
| ENSGALG00010014393 | 0.949943836 | 0.323147382 |
| ENSGALG00010014394 | 0.476036995 | 0.156947873 |
| ENSGALG00010014396 | 0.52898294  | 0.016771284 |
| ENSGALG00010014397 | 0.973726576 | 0.3664003   |
| ENSGALG00010014398 | 0.97540814  | 0.263116461 |
| ENSGALG00010014399 | 0.772463038 | 0.37114427  |
| ENSGALG00010014400 | 0.965038103 | 0.235683204 |
| ENSGALG00010014401 | 0.980682636 | 0.265945461 |
| ENSGALG00010014403 | 0.648110821 | 0.150923233 |
| ENSGALG00010014406 | 0.9740495   | 0.269355597 |
| ENSGALG00010014407 | 0.232924711 | 0.221149552 |
| ENSGALG00010014408 | 0.984911821 | 0.29308878  |
| ENSGALG00010014410 | 0.056449346 | 0.052133601 |
| ENSGALG00010014411 | 0.970605298 | 0.311393509 |
| ENSGALG00010014413 | 0.415779243 | 0.262119767 |
| ENSGALG00010014414 | 0.324514485 | 0.031261924 |
| ENSGALG00010014415 | 0.480086695 | 0.200222048 |
| ENSGALG00010014416 | 0.770535743 | 0.372678013 |
| ENSGALG00010014418 | 0.934766045 | 0.261910205 |
| ENSGALG00010014419 | 0.382958892 | 0.167925233 |
| ENSGALG00010014423 | 0.725029386 | 0.261962815 |
| ENSGALG00010014424 | 0.020656918 | 0.064774402 |
| ENSGALG00010014425 | 0.380102233 | 0.015133334 |
| ENSGALG00010014426 | 0.753949693 | 0.313799331 |
| ENSGALG00010014427 | 0.867019529 | 0.256904307 |
| ENSGALG00010014428 | 0.634319867 | 0.218725164 |
| ENSGALG00010014429 | 0.980394919 | 0.22999007  |
| ENSGALG00010014430 | 0.656722601 | 0.376908199 |
| ENSGALG00010014431 | 0.228162281 | 0.172242359 |
| ENSGALG00010014432 | 0.702762265 | 0.138754123 |
| ENSGALG00010014434 | 0.333124356 | 0.233734168 |
| ENSGALG00010014436 | 0.387473629 | 0.117811347 |
| ENSGALG00010014439 | 0.022074453 | 0.027483581 |
| ENSGALG00010014441 | 0.176677727 | 0.092693733 |
| ENSGALG00010014442 | 0.018301635 | 0.519548151 |
| ENSGALG00010014444 | 0.122979657 | 0.005488898 |
| ENSGALG00010014448 | 0.446580205 | 0.105074988 |
| ENSGALG00010014449 | 0.884514376 | 0.186555269 |
| ENSGALG00010014451 | 0.441900415 | 0.170592338 |
| ENSGALG00010014453 | 0.993802687 | 0.294856495 |

|                    |             |             |
|--------------------|-------------|-------------|
| ENSGALG00010014454 | 0.377140458 | 0.079224336 |
| ENSGALG00010014455 | 0.473954511 | 0.248185324 |
| ENSGALG00010014459 | 0.578128305 | 0.067072938 |
| ENSGALG00010014462 | 0.611931155 | 0.180370296 |
| ENSGALG00010014464 | 0.076380867 | 0.061149184 |
| ENSGALG00010014465 | 0.979565558 | 0.305045343 |
| ENSGALG00010014466 | 0.724960639 | 0.10519068  |
| ENSGALG00010014468 | 0.036547844 | 0.303156115 |
| ENSGALG00010014469 | 0.786807711 | 0.186043448 |
| ENSGALG00010014470 | 0.981644336 | 0.311137128 |
| ENSGALG00010014472 | 0.372162866 | 0.080568109 |
| ENSGALG00010014474 | 0.985129785 | 0.363321054 |
| ENSGALG00010014476 | 0.853918996 | 0.383621823 |
| ENSGALG00010014477 | 0.980814425 | 0.293174186 |
| ENSGALG00010014478 | 0.305953318 | 0.250597651 |
| ENSGALG00010014480 | 0.991803269 | 0.292721305 |
| ENSGALG00010014482 | 0.125247515 | 0.17037319  |
| ENSGALG00010014484 | 0.96314534  | 0.262304787 |
| ENSGALG00010014485 | 0.40135901  | 0.158038591 |
| ENSGALG00010014487 | 0.959370084 | 0.324310041 |
| ENSGALG00010014488 | 0.858419385 | 0.170752646 |
| ENSGALG00010014490 | 0.358759145 | 0.183668006 |
| ENSGALG00010014492 | 0.635700758 | 0.176160876 |
| ENSGALG00010014493 | 0.521333825 | 0.343906194 |
| ENSGALG00010014494 | 0.810522696 | 0.403035462 |
| ENSGALG00010014495 | 0.872390426 | 0.393838422 |
| ENSGALG00010014496 | 0.07518309  | 0.066451201 |
| ENSGALG00010014497 | 0.050668086 | 0.013878872 |
| ENSGALG00010014500 | 0.323738128 | 0.135328488 |
| ENSGALG00010014504 | 0.86817014  | 0.26297612  |
| ENSGALG00010014505 | 0.98070355  | 0.405706187 |
| ENSGALG00010014507 | 0.313618903 | 0.186906495 |
| ENSGALG00010014509 | 0.068903434 | 0.166940722 |
| ENSGALG00010014512 | 0.870454241 | 0.242995584 |
| ENSGALG00010014513 | 0.394494248 | 0.128304162 |
| ENSGALG00010014515 | 0.960504606 | 0.313414703 |
| ENSGALG00010014517 | 0.968734559 | 0.234333294 |
| ENSGALG00010014522 | 0.810456986 | 0.316498115 |
| ENSGALG00010014523 | 0.491102471 | 0.199717228 |
| ENSGALG00010014525 | 0.282754916 | 0.323313762 |
| ENSGALG00010014527 | 0.490281073 | 0.235545194 |
| ENSGALG00010014529 | 0.535359982 | 0.074383053 |
| ENSGALG00010014532 | 0.125498244 | 0.090447055 |
| ENSGALG00010014533 | 0.442480559 | 0.182338764 |
| ENSGALG00010014534 | 0.265558089 | 0.028821141 |
| ENSGALG00010014536 | 0.363876531 | 0.1141785   |
| ENSGALG00010014537 | 0.044012277 | 0.345497229 |
| ENSGALG00010014538 | 0.37751878  | 0.23251672  |
| ENSGALG00010014539 | 0.906364589 | 0.267330191 |
| ENSGALG00010014540 | 0.996002559 | 0.336007033 |
| ENSGALG00010014542 | 0.3910821   | 0.072487727 |
| ENSGALG00010014543 | 0.037014007 | 0.170276634 |
| ENSGALG00010014545 | 0.956731427 | 0.336394333 |
| ENSGALG00010014547 | 0.97083018  | 0.294567664 |
| ENSGALG00010014548 | 0.406469659 | 0.441870834 |
| ENSGALG00010014550 | 0.500455472 | 0.188083547 |

|                    |             |             |
|--------------------|-------------|-------------|
| ENSGALG00010014551 | 0.386254376 | 0.161451439 |
| ENSGALG00010014553 | 0.641509342 | 0.083209536 |
| ENSGALG00010014555 | 0.285115707 | 0.117813521 |
| ENSGALG00010014558 | 0.824940193 | 0.225421532 |
| ENSGALG00010014559 | 0.635308243 | 0.1357398   |
| ENSGALG00010014562 | 0.878025086 | 0.250355146 |
| ENSGALG00010014563 | 0.008565402 | 0.00863032  |
| ENSGALG00010014564 | 0.77309401  | 0.284896773 |
| ENSGALG00010014565 | 0.870073117 | 0.463884784 |
| ENSGALG00010014567 | 0.683596862 | 0.27575507  |
| ENSGALG00010014568 | 0.392964283 | 0.330603017 |
| ENSGALG00010014569 | 0.746260639 | 0.213044024 |
| ENSGALG00010014570 | 0.368756523 | 0.218214731 |
| ENSGALG00010014571 | 0.954808176 | 0.367495287 |
| ENSGALG00010014572 | 0.980364376 | 0.265303838 |
| ENSGALG00010014573 | 0.536884584 | 0.228002413 |
| ENSGALG00010014574 | 0.632003304 | 0.342206019 |
| ENSGALG00010014575 | 0.365962212 | 0.234393377 |
| ENSGALG00010014576 | 0.642168443 | 0.276985531 |
| ENSGALG00010014577 | 0.346384801 | 0.248568751 |
| ENSGALG00010014578 | 0.804972152 | 0.269744517 |
| ENSGALG00010014579 | 0.944210848 | 0.266030825 |
| ENSGALG00010014580 | 0.240341266 | 0.118990471 |
| ENSGALG00010014582 | 0.659598408 | 0.617698859 |
| ENSGALG00010014583 | 0.38813597  | 0.156768404 |
| ENSGALG00010014585 | 0.981311199 | 0.310509023 |
| ENSGALG00010014586 | 0.39259554  | 0.208198583 |
| ENSGALG00010014587 | 0.756655543 | 0.221230863 |
| ENSGALG00010014588 | 0.867848348 | 0.352834869 |
| ENSGALG00010014591 | 0.929367777 | 0.315720909 |
| ENSGALG00010014592 | 0.171875219 | 0.098010428 |
| ENSGALG00010014598 | 0.798860406 | 0.281709276 |
| ENSGALG00010014599 | 0.766258259 | 0.431818278 |
| ENSGALG00010014600 | 0.745557987 | 0.210201081 |
| ENSGALG00010014602 | 0.991149649 | 0.292550668 |
| ENSGALG00010014603 | 0.596683684 | 0.270641028 |
| ENSGALG00010014607 | 0.697111205 | 0.293577256 |
| ENSGALG00010014611 | 0.703428802 | 0.429553039 |
| ENSGALG00010014613 | 0.160873349 | 0.314690278 |
| ENSGALG00010014614 | 0.932574482 | 0.316392247 |
| ENSGALG00010014615 | 0.409486278 | 0.157951038 |
| ENSGALG00010014617 | 0.746031738 | 0.101458967 |
| ENSGALG00010014619 | 0.386050996 | 0.14466628  |
| ENSGALG00010014623 | 0.531592418 | 0.005834432 |
| ENSGALG00010014624 | 0.56839131  | 0.237265762 |
| ENSGALG00010014625 | 0.891679722 | 0.409180736 |
| ENSGALG00010014626 | 0.064286412 | 0.405761582 |
| ENSGALG00010014627 | 0.285272007 | 0.109169955 |
| ENSGALG00010014629 | 0.089765396 | 0.095692089 |
| ENSGALG00010014630 | 0.202954004 | 0.527525171 |
| ENSGALG00010014631 | 0.372997723 | 0.16116762  |
| ENSGALG00010014632 | 0.524352281 | 0.266500789 |
| ENSGALG00010014633 | 0.477518871 | 0.28890509  |
| ENSGALG00010014634 | 0.989708925 | 0.281992927 |
| ENSGALG00010014635 | 0.355008442 | 0.209211752 |
| ENSGALG00010014636 | 0.025879769 | 0.000753611 |

|                    |             |             |
|--------------------|-------------|-------------|
| ENSGALG00010014638 | 0.364055186 | 0.42690201  |
| ENSGALG00010014639 | 0.265558089 | 0.028821141 |
| ENSGALG00010014640 | 0.364233449 | 0.112130852 |
| ENSGALG00010014641 | 0.367223028 | 0.229517479 |
| ENSGALG00010014642 | 0.939422195 | 0.309370397 |
| ENSGALG00010014644 | 0.540244583 | 0.116718164 |
| ENSGALG00010014645 | 0.700920095 | 0.190841626 |
| ENSGALG00010014647 | 0.369875003 | 0.291167377 |
| ENSGALG00010014648 | 0.896159941 | 0.291825055 |
| ENSGALG00010014649 | 0.222381971 | 0.242489937 |
| ENSGALG00010014651 | 0.060053542 | 0.273736993 |
| ENSGALG00010014652 | 0.938374603 | 0.300047237 |
| ENSGALG00010014653 | 0.959462248 | 0.334524713 |
| ENSGALG00010014654 | 0.783690044 | 0.269577391 |
| ENSGALG00010014655 | 0.937047783 | 0.311774554 |
| ENSGALG00010014656 | 0.732425882 | 0.310902332 |
| ENSGALG00010014657 | 0.470349358 | 0.303602487 |
| ENSGALG00010014658 | 0.990557478 | 0.294658185 |
| ENSGALG00010014661 | 0.040462525 | 0.140214121 |
| ENSGALG00010014664 | 0.082219616 | 0.123558789 |
| ENSGALG00010014666 | 0.355404278 | 0.180504476 |
| ENSGALG00010014667 | 0.94839342  | 0.220200887 |
| ENSGALG00010014668 | 0.952748784 | 0.298690014 |
| ENSGALG00010014669 | 0.390418234 | 0.123263498 |
| ENSGALG00010014673 | 0.857823266 | 0.354289945 |
| ENSGALG00010014674 | 0.358187506 | 0.245502378 |
| ENSGALG00010014675 | 0.186893153 | 0.150171274 |
| ENSGALG00010014676 | 0.906750296 | 0.205102349 |
| ENSGALG00010014677 | 0.800049918 | 0.117111362 |
| ENSGALG00010014680 | 0.429073832 | 0.284542873 |
| ENSGALG00010014681 | 0.68609793  | 0.228534298 |
| ENSGALG00010014682 | 0.846205277 | 0.277646267 |
| ENSGALG00010014683 | 0.361470737 | 0.15237379  |
| ENSGALG00010014684 | 0.442695998 | 0.373553176 |
| ENSGALG00010014685 | 0.518521159 | 0.262309343 |
| ENSGALG00010014687 | 0.938126398 | 0.279838827 |
| ENSGALG00010014690 | 0.901426456 | 0.324620506 |
| ENSGALG00010014691 | 0.383294577 | 0.171398002 |
| ENSGALG00010014692 | 0.349203243 | 0.141617585 |
| ENSGALG00010014693 | 0.203991683 | 0.058221925 |
| ENSGALG00010014694 | 0.579295337 | 0.190118872 |
| ENSGALG00010014696 | 0.996625715 | 0.350970003 |
| ENSGALG00010014697 | 0.766217883 | 0.153747099 |
| ENSGALG00010014698 | 0.166682034 | 0.069006121 |
| ENSGALG00010014700 | 0.123027899 | 0.152780433 |
| ENSGALG00010014702 | 0.678665924 | 0.065673069 |
| ENSGALG00010014703 | 0.946703232 | 0.453126133 |
| ENSGALG00010014704 | 0.130032832 | 0.019391731 |
| ENSGALG00010014705 | 0.898767376 | 0.358440479 |
| ENSGALG00010014707 | 0.949130167 | 0.259514767 |
| ENSGALG00010014708 | 0.292709036 | 0.327963953 |
| ENSGALG00010014710 | 0.993217893 | 0.354475705 |
| ENSGALG00010014712 | 0.271701261 | 0.072417625 |
| ENSGALG00010014713 | 0.368451542 | 0.026399899 |
| ENSGALG00010014716 | 0.676994974 | 0.467247287 |
| ENSGALG00010014717 | 0.475672252 | 0.381943347 |

|                    |             |             |
|--------------------|-------------|-------------|
| ENSGALG00010014721 | 0.396808512 | 0.241687704 |
| ENSGALG00010014722 | 0.960322897 | 0.2911526   |
| ENSGALG00010014723 | 0.748674459 | 0.569598891 |
| ENSGALG00010014724 | 0.74995786  | 0.260758407 |
| ENSGALG00010014725 | 0.433660462 | 0.058736438 |
| ENSGALG00010014726 | 0.937297448 | 0.329744898 |
| ENSGALG00010014727 | 0.682750773 | 0.004726109 |
| ENSGALG00010014728 | 0.986107727 | 0.307493755 |
| ENSGALG00010014729 | 0.97636377  | 0.312472722 |
| ENSGALG00010014730 | 0.38742626  | 0.154147022 |
| ENSGALG00010014731 | 0.525034135 | 0.220204673 |
| ENSGALG00010014732 | 0.411129067 | 0.215685987 |
| ENSGALG00010014734 | 0.866335541 | 0.341798175 |
| ENSGALG00010014735 | 0.909939041 | 0.340026117 |
| ENSGALG00010014736 | 0.633488395 | 0.178445293 |
| ENSGALG00010014737 | 0.722205298 | 0.428913169 |
| ENSGALG00010014738 | 0.782507974 | 0.513294119 |
| ENSGALG00010014739 | 0.961795642 | 0.324112287 |
| ENSGALG00010014740 | 0.506400784 | 0.212008755 |
| ENSGALG00010014742 | 0.988526627 | 0.383374962 |
| ENSGALG00010014743 | 0.865350312 | 0.312409449 |
| ENSGALG00010014744 | 0.933726083 | 0.246617469 |
| ENSGALG00010014745 | 0.864870416 | 0.308539103 |
| ENSGALG00010014746 | 0.389333388 | 0.090852028 |
| ENSGALG00010014747 | 0.361814957 | 0.21853291  |
| ENSGALG00010014748 | 0.96748513  | 0.322024065 |
| ENSGALG00010014750 | 0.110726559 | 0.038810103 |
| ENSGALG00010014751 | 0.287100517 | 0.099799561 |
| ENSGALG00010014753 | 0.264857785 | 0.18590028  |
| ENSGALG00010014754 | 0.694997882 | 0.291219849 |
| ENSGALG00010014755 | 0.422849039 | 0.117723675 |
| ENSGALG00010014756 | 0.478335955 | 0.142604859 |
| ENSGALG00010014758 | 0.069545882 | 0.039778921 |
| ENSGALG00010014759 | 0.628545439 | 0.256933148 |
| ENSGALG00010014760 | 0.593780534 | 0.06959194  |
| ENSGALG00010014762 | 0.702962182 | 0.018667778 |
| ENSGALG00010014764 | 0.994966593 | 0.334373461 |
| ENSGALG00010014766 | 0.974317611 | 0.298087474 |
| ENSGALG00010014767 | 0.361229439 | 0.172843665 |
| ENSGALG00010014768 | 0.36076785  | 0.482483507 |
| ENSGALG00010014769 | 0.735203885 | 0.242562302 |
| ENSGALG00010014771 | 0.551270423 | 0.285599955 |
| ENSGALG00010014772 | 0.953272397 | 0.320081581 |
| ENSGALG00010014773 | 0.574852109 | 0.185447775 |
| ENSGALG00010014776 | 0.510225572 | 0.272066764 |
| ENSGALG00010014777 | 0.086234425 | 0.374964954 |
| ENSGALG00010014778 | 0.997059166 | 0.334911133 |
| ENSGALG00010014780 | 0.556985377 | 0.242025362 |
| ENSGALG00010014782 | 0.584445699 | 0.000870181 |
| ENSGALG00010014783 | 0.932164807 | 0.138922071 |
| ENSGALG00010014785 | 0.301600478 | 0.303177417 |
| ENSGALG00010014788 | 0.407656186 | 0.076012416 |
| ENSGALG00010014789 | 0.99232468  | 0.274988159 |
| ENSGALG00010014792 | 0.904638107 | 0.319367002 |
| ENSGALG00010014793 | 0.960997449 | 0.236372901 |
| ENSGALG00010014795 | 0.386381878 | 0.531713305 |

|                    |             |             |
|--------------------|-------------|-------------|
| ENSGALG00010014796 | 0.767164083 | 0.285157942 |
| ENSGALG00010014797 | 0.954436584 | 0.365799348 |
| ENSGALG00010014801 | 0.886505166 | 0.203811305 |
| ENSGALG00010014802 | 0.787045903 | 0.274499616 |
| ENSGALG00010014805 | 0.881333907 | 0.321961364 |
| ENSGALG00010014806 | 0.995118453 | 0.320468635 |
| ENSGALG00010014807 | 0.976343369 | 0.277548862 |
| ENSGALG00010014809 | 0.400441604 | 0.007124268 |
| ENSGALG00010014810 | 0.911448042 | 0.367908423 |
| ENSGALG00010014811 | 0.914822073 | 0.505447103 |
| ENSGALG00010014812 | 0.972465851 | 0.269125849 |
| ENSGALG00010014813 | 0.912389297 | 0.2605677   |
| ENSGALG00010014815 | 0.208550923 | 0.676301294 |
| ENSGALG00010014816 | 0.909067689 | 0.311936006 |
| ENSGALG00010014817 | 0.571550444 | 0.153396742 |
| ENSGALG00010014818 | 0.005463639 | 0.442063768 |
| ENSGALG00010014819 | 0.658282855 | 0.352245294 |
| ENSGALG00010014820 | 0.453135293 | 0.022781597 |
| ENSGALG00010014821 | 0.983551017 | 0.313339706 |
| ENSGALG00010014822 | 0.573087024 | 0.304528055 |
| ENSGALG00010014823 | 0.334408962 | 0.154015172 |
| ENSGALG00010014824 | 0.829016668 | 0.347014892 |
| ENSGALG00010014825 | 0.809143342 | 0.272761567 |
| ENSGALG00010014826 | 0.838503321 | 0.204451304 |
| ENSGALG00010014827 | 0.676583249 | 0.205369359 |
| ENSGALG00010014828 | 0.055966411 | 0.152701962 |
| ENSGALG00010014829 | 0.88259689  | 0.378641942 |
| ENSGALG00010014830 | 0.549519592 | 0.596191278 |
| ENSGALG00010014831 | 0.895886008 | 0.293947862 |
| ENSGALG00010014832 | 0.218098117 | 0.159922573 |
| ENSGALG00010014833 | 0.275160291 | 0.227691137 |
| ENSGALG00010014834 | 0.712638295 | 0.17796094  |
| ENSGALG00010014835 | 0.478320512 | 0.178306522 |
| ENSGALG00010014836 | 0.691134718 | 0.031267806 |
| ENSGALG00010014837 | 0.529681126 | 0.218384927 |
| ENSGALG00010014838 | 0.417434606 | 0.118622464 |
| ENSGALG00010014839 | 0.771769145 | 0.062292587 |
| ENSGALG00010014840 | 0.944924304 | 0.184736901 |
| ENSGALG00010014844 | 0.393807095 | 0.368308303 |
| ENSGALG00010014845 | 0.14242522  | 0.328668018 |
| ENSGALG00010014846 | 0.329744371 | 0.371370966 |
| ENSGALG00010014847 | 0.980205916 | 0.341884035 |
| ENSGALG00010014851 | 0.451440829 | 0.185296104 |
| ENSGALG00010014852 | 0.171988536 | 0.357029771 |
| ENSGALG00010014853 | 0.365421542 | 0.060491169 |
| ENSGALG00010014854 | 0.265558089 | 0.028821141 |
| ENSGALG00010014856 | 0.939968632 | 0.31502278  |
| ENSGALG00010014857 | 0.4686264   | 0.113623448 |
| ENSGALG00010014859 | 0.955315621 | 0.364230082 |
| ENSGALG00010014860 | 0.287538582 | 0.122952094 |
| ENSGALG00010014861 | 0.783064451 | 0.096771875 |
| ENSGALG00010014862 | 0.026695066 | 0.171844461 |
| ENSGALG00010014864 | 0.764318006 | 0.308794211 |
| ENSGALG00010014865 | 0.981941307 | 0.311771154 |
| ENSGALG00010014866 | 0.936418256 | 0.431416916 |
| ENSGALG00010014867 | 0.720329554 | 0.171406193 |

|                    |             |             |
|--------------------|-------------|-------------|
| ENSGALG00010014868 | 0.684745878 | 0.492883633 |
| ENSGALG00010014870 | 0.409436406 | 0.157934013 |
| ENSGALG00010014871 | 0.732123297 | 0.276792609 |
| ENSGALG00010014873 | 0.720859809 | 0.334197431 |
| ENSGALG00010014875 | 0.636912574 | 0.149124911 |
| ENSGALG00010014876 | 0.234371858 | 0.022223252 |
| ENSGALG00010014877 | 0.29921203  | 0.437704604 |
| ENSGALG00010014878 | 0.765696645 | 0.274551503 |
| ENSGALG00010014879 | 0.753945776 | 0.225548648 |
| ENSGALG00010014880 | 0.681995219 | 0.530805037 |
| ENSGALG00010014881 | 0.160800845 | 0.258228505 |
| ENSGALG00010014882 | 0.972559554 | 0.284970602 |
| ENSGALG00010014883 | 0.987185997 | 0.327756501 |
| ENSGALG00010014886 | 0.897971933 | 0.263926436 |
| ENSGALG00010014887 | 0.826017072 | 0.193828292 |
| ENSGALG00010014888 | 0.512207956 | 0.2308252   |
| ENSGALG00010014889 | 0.894622326 | 0.201599841 |
| ENSGALG00010014890 | 0.088758412 | 0.165463429 |
| ENSGALG00010014891 | 0.5700742   | 0.437182807 |
| ENSGALG00010014892 | 0.769067582 | 0.196498335 |
| ENSGALG00010014893 | 0.433571854 | 0.035498978 |
| ENSGALG00010014894 | 0.193845926 | 0.218617081 |
| ENSGALG00010014895 | 0.317468071 | 0.452961925 |
| ENSGALG00010014897 | 0.877268957 | 0.42428726  |
| ENSGALG00010014898 | 0.45869831  | 0.028895944 |
| ENSGALG00010014899 | 0.14361461  | 0.484383905 |
| ENSGALG00010014900 | 0.284249958 | 0.098679062 |
| ENSGALG00010014902 | 0.808665621 | 0.239730207 |
| ENSGALG00010014903 | 0.976451956 | 0.298361872 |
| ENSGALG00010014904 | 0.200570274 | 0.091667991 |
| ENSGALG00010014905 | 0.425508884 | 0.133407704 |
| ENSGALG00010014906 | 0.193451095 | 0.215576658 |
| ENSGALG00010014907 | 0.201321102 | 0.260528004 |
| ENSGALG00010014908 | 0.933792214 | 0.301424288 |
| ENSGALG00010014909 | 0.13637447  | 0.160729063 |
| ENSGALG00010014910 | 0.450713864 | 0.178537055 |
| ENSGALG00010014911 | 0.685962652 | 0.202788383 |
| ENSGALG00010014912 | 0.689411816 | 0.588340984 |
| ENSGALG00010014914 | 0.775695027 | 0.143254686 |
| ENSGALG00010014915 | 0.086657171 | 0.03213558  |
| ENSGALG00010014916 | 0.685046671 | 0.098189513 |
| ENSGALG00010014917 | 0.947661054 | 0.30461301  |
| ENSGALG00010014918 | 0.561513854 | 0.094786986 |
| ENSGALG00010014919 | 0.364797438 | 0.061749059 |
| ENSGALG00010014922 | 0.992825492 | 0.315495979 |
| ENSGALG00010014923 | 0.049550984 | 0.122051033 |
| ENSGALG00010014927 | 0.118658777 | 0.09508325  |
| ENSGALG00010014928 | 0.846737357 | 0.306987923 |
| ENSGALG00010014929 | 0.913162588 | 0.39148912  |
| ENSGALG00010014930 | 0.378848707 | 0.137590461 |
| ENSGALG00010014931 | 0.591131253 | 0.31169671  |
| ENSGALG00010014934 | 0.93926461  | 0.319371445 |
| ENSGALG00010014935 | 0.960622468 | 0.332105829 |
| ENSGALG00010014936 | 0.196837525 | 0.086885519 |
| ENSGALG00010014940 | 0.857150792 | 0.267563714 |
| ENSGALG00010014941 | 0.584569341 | 0.047825298 |



|                    |             |             |
|--------------------|-------------|-------------|
| ENSGALG00010014942 | 0.316934322 | 0.251382524 |
| ENSGALG00010014943 | 0.80048352  | 0.334615837 |
| ENSGALG00010014944 | 0.994471688 | 0.333204125 |
| ENSGALG00010014945 | 0.488264621 | 0.167554431 |
| ENSGALG00010014946 | 0.985343787 | 0.327120634 |
| ENSGALG00010014948 | 0.973854048 | 0.326578763 |
| ENSGALG00010014949 | 0.814144107 | 0.092991835 |
| ENSGALG00010014951 | 0.015759578 | 0.118247465 |
| ENSGALG00010014952 | 0.470755615 | 0.128493623 |
| ENSGALG00010014953 | 0.886348015 | 0.411934238 |
| ENSGALG00010014954 | 0.711872939 | 0.507681448 |
| ENSGALG00010014956 | 0.994534064 | 0.345685138 |
| ENSGALG00010014957 | 0.606068811 | 0.268934799 |
| ENSGALG00010014958 | 0.381472652 | 0.117237179 |
| ENSGALG00010014963 | 0.992160017 | 0.355097787 |
| ENSGALG00010014965 | 0.907695434 | 0.463692032 |
| ENSGALG00010014967 | 0.265786385 | 0.085111598 |
| ENSGALG00010014970 | 0.982292107 | 0.278504743 |
| ENSGALG00010014971 | 0.980473249 | 0.347698225 |
| ENSGALG00010014972 | 0.996910991 | 0.338108252 |
| ENSGALG00010014973 | 0.653599692 | 0.195715736 |
| ENSGALG00010014974 | 0.871307973 | 0.404825033 |
| ENSGALG00010014976 | 0.976840074 | 0.324437192 |
| ENSGALG00010014977 | 0.285272007 | 0.109169955 |
| ENSGALG00010014978 | 0.719379259 | 0.127026558 |
| ENSGALG00010014979 | 0.285272007 | 0.109169955 |
| ENSGALG00010014980 | 0.907780345 | 0.54788841  |
| ENSGALG00010014981 | 0.363002822 | 0.184244517 |
| ENSGALG00010014982 | 0.670821885 | 0.016583514 |
| ENSGALG00010014983 | 0.065910046 | 0.322413415 |
| ENSGALG00010014984 | 0.390182534 | 0.290651872 |
| ENSGALG00010014985 | 0.882697671 | 0.318843855 |
| ENSGALG00010014987 | 0.250376248 | 0.231572513 |
| ENSGALG00010014988 | 0.13608142  | 0.124976599 |
| ENSGALG00010014989 | 0.959275618 | 0.303438867 |
| ENSGALG00010014990 | 0.463122908 | 0.240845612 |
| ENSGALG00010014991 | 0.544530773 | 0.482167624 |
| ENSGALG00010014992 | 0.451105651 | 0.458515103 |
| ENSGALG00010014994 | 0.55468594  | 0.056413373 |
| ENSGALG00010014995 | 0.972323552 | 0.253771933 |
| ENSGALG00010014996 | 0.099823104 | 0.029850532 |
| ENSGALG00010014997 | 0.753943112 | 0.34061151  |
| ENSGALG00010014998 | 0.366289438 | 0.247197773 |
| ENSGALG00010014999 | 0.211752083 | 0.171001832 |
| ENSGALG00010015002 | 0.429269608 | 0.383107829 |
| ENSGALG00010015006 | 0.991088041 | 0.331657563 |
| ENSGALG00010015008 | 0.604623513 | 0.200749961 |
| ENSGALG00010015009 | 0.634945195 | 0.259144782 |
| ENSGALG00010015010 | 0.575190928 | 0.142105877 |
| ENSGALG00010015013 | 0.895290816 | 0.267411827 |
| ENSGALG00010015015 | 0.499546691 | 0.179313888 |
| ENSGALG00010015016 | 0.253154897 | 0.262820722 |
| ENSGALG00010015017 | 0.850461995 | 0.232972035 |
| ENSGALG00010015018 | 0.31704587  | 0.011957074 |
| ENSGALG00010015019 | 0.270451009 | 0.090541667 |
| ENSGALG00010015020 | 0.991631851 | 0.349247228 |

|                    |             |             |
|--------------------|-------------|-------------|
| ENSGALG00010015021 | 0.762971684 | 0.276424456 |
| ENSGALG00010015023 | 0.60866963  | 0.004769025 |
| ENSGALG00010015024 | 0.767317115 | 0.162894613 |
| ENSGALG00010015025 | 0.250668281 | 0.147012492 |
| ENSGALG00010015026 | 0.361476659 | 0.150924776 |
| ENSGALG00010015027 | 0.604578943 | 0.241704694 |
| ENSGALG00010015028 | 0.152480934 | 0.264102628 |
| ENSGALG00010015029 | 0.594720883 | 0.023318381 |
| ENSGALG00010015030 | 0.967578268 | 0.314785696 |
| ENSGALG00010015031 | 0.871719333 | 0.217113998 |
| ENSGALG00010015032 | 0.833412256 | 0.425099905 |
| ENSGALG00010015033 | 0.827290992 | 0.234415656 |
| ENSGALG00010015035 | 0.614295667 | 0.292719403 |
| ENSGALG00010015036 | 0.023279831 | 0.134374301 |
| ENSGALG00010015037 | 0.943777048 | 0.28469214  |
| ENSGALG00010015038 | 0.943978515 | 0.276453786 |
| ENSGALG00010015039 | 0.058960232 | 0.320684423 |
| ENSGALG00010015040 | 0.916492438 | 0.207625843 |
| ENSGALG00010015041 | 0.001517382 | 0.279031796 |
| ENSGALG00010015042 | 0.871843592 | 0.358608798 |
| ENSGALG00010015043 | 0.085229685 | 0.293188335 |
| ENSGALG00010015044 | 0.896489595 | 0.336994443 |
| ENSGALG00010015046 | 0.893715882 | 0.359476886 |
| ENSGALG00010015047 | 0.759028937 | 0.441110989 |
| ENSGALG00010015049 | 0.316889607 | 0.014597864 |
| ENSGALG00010015050 | 0.804780119 | 0.317281061 |
| ENSGALG00010015052 | 0.920941488 | 0.426124519 |
| ENSGALG00010015053 | 0.405849911 | 0.06592907  |
| ENSGALG00010015054 | 0.810320756 | 0.501783175 |
| ENSGALG00010015055 | 0.97001458  | 0.302546961 |
| ENSGALG00010015056 | 0.651604218 | 0.239977916 |
| ENSGALG00010015057 | 0.665446766 | 0.270863834 |
| ENSGALG00010015058 | 0.011120243 | 0.01000129  |
| ENSGALG00010015059 | 0.932991112 | 0.316494702 |
| ENSGALG00010015060 | 0.490749578 | 0.505630649 |
| ENSGALG00010015061 | 0.900809662 | 0.200078186 |
| ENSGALG00010015062 | 0.864862282 | 0.215287592 |
| ENSGALG00010015063 | 0.129242349 | 0.039732684 |
| ENSGALG00010015064 | 0.978220003 | 0.366319616 |
| ENSGALG00010015065 | 0.992108546 | 0.35207722  |
| ENSGALG00010015066 | 0.756448091 | 0.465331835 |
| ENSGALG00010015067 | 0.090825598 | 0.315253713 |
| ENSGALG00010015068 | 0.525362042 | 0.50022071  |
| ENSGALG00010015069 | 0.942906105 | 0.337725872 |
| ENSGALG00010015070 | 0.14591649  | 0.270351184 |
| ENSGALG00010015071 | 0.525078838 | 0.109401122 |
| ENSGALG00010015072 | 0.856090252 | 0.325129261 |
| ENSGALG00010015074 | 0.423141104 | 0.265228141 |
| ENSGALG00010015075 | 0.995716758 | 0.356573879 |
| ENSGALG00010015076 | 0.951532495 | 0.16641196  |
| ENSGALG00010015077 | 0.06817362  | 0.172942874 |
| ENSGALG00010015078 | 0.482305655 | 0.182238968 |
| ENSGALG00010015080 | 0.787598573 | 0.152383717 |
| ENSGALG00010015082 | 0.811700897 | 0.336146163 |
| ENSGALG00010015083 | 0.866159885 | 0.298175004 |
| ENSGALG00010015084 | 0.8424844   | 0.437426213 |

|                    |             |             |
|--------------------|-------------|-------------|
| ENSGALG00010015085 | 0.955377923 | 0.334851541 |
| ENSGALG00010015086 | 0.071163159 | 0.150313734 |
| ENSGALG00010015087 | 0.348012532 | 0.131070993 |
| ENSGALG00010015088 | 0.357827325 | 0.065941713 |
| ENSGALG00010015089 | 0.187152416 | 0.121744695 |
| ENSGALG00010015090 | 0.921114132 | 0.433619482 |
| ENSGALG00010015091 | 0.948774978 | 0.250793146 |
| ENSGALG00010015092 | 0.914697433 | 0.305725747 |
| ENSGALG00010015093 | 0.684200152 | 0.240927287 |
| ENSGALG00010015094 | 0.985842875 | 0.333169352 |
| ENSGALG00010015095 | 0.985779412 | 0.324684837 |
| ENSGALG00010015096 | 0.214146421 | 0.153398195 |
| ENSGALG00010015097 | 0.963726049 | 0.2899543   |
| ENSGALG00010015098 | 0.978809265 | 0.301833075 |
| ENSGALG00010015100 | 0.980538008 | 0.320813614 |
| ENSGALG00010015101 | 0.979167486 | 0.292759928 |
| ENSGALG00010015104 | 0.547280265 | 0.343843417 |
| ENSGALG00010015105 | 0.919494834 | 0.218639077 |
| ENSGALG00010015106 | 0.216433634 | 0.680598293 |
| ENSGALG00010015107 | 0.78290024  | 0.27639434  |
| ENSGALG00010015108 | 0.018598736 | 0.192380243 |
| ENSGALG00010015109 | 0.972265856 | 0.248861484 |
| ENSGALG00010015110 | 0.10139089  | 0.052099271 |
| ENSGALG00010015111 | 0.703302092 | 0.073545321 |
| ENSGALG00010015112 | 0.374058465 | 0.124202176 |
| ENSGALG00010015113 | 0.195851107 | 0.167102021 |
| ENSGALG00010015115 | 0.785135107 | 0.308803187 |
| ENSGALG00010015116 | 0.271701261 | 0.072417625 |
| ENSGALG00010015117 | 0.360323172 | 0.336213895 |
| ENSGALG00010015118 | 0.920389506 | 0.27519638  |
| ENSGALG00010015119 | 0.941021775 | 0.280157811 |
| ENSGALG00010015120 | 0.24387788  | 0.217444781 |
| ENSGALG00010015121 | 0.910821662 | 0.318296623 |
| ENSGALG00010015122 | 0.684366221 | 0.273735386 |
| ENSGALG00010015123 | 0.943454256 | 0.293358946 |
| ENSGALG00010015124 | 0.863051687 | 0.400174918 |
| ENSGALG00010015125 | 0.277566769 | 0.107857127 |
| ENSGALG00010015126 | 0.507879496 | 0.126726054 |
| ENSGALG00010015127 | 0.772938111 | 0.330304528 |
| ENSGALG00010015128 | 0.966850799 | 0.305210072 |
| ENSGALG00010015129 | 0.715695225 | 0.385794844 |
| ENSGALG00010015130 | 0.383512035 | 0.158206748 |
| ENSGALG00010015131 | 0.944804632 | 0.365184331 |
| ENSGALG00010015132 | 0.948166348 | 0.320216676 |
| ENSGALG00010015133 | 0.82617821  | 0.268090195 |
| ENSGALG00010015134 | 0.138260956 | 0.331831533 |
| ENSGALG00010015136 | 0.805823467 | 0.169141958 |
| ENSGALG00010015137 | 0.949765228 | 0.304021482 |
| ENSGALG00010015138 | 0.749603387 | 0.214119843 |
| ENSGALG00010015140 | 0.512360269 | 0.084583234 |
| ENSGALG00010015141 | 0.872600172 | 0.286037245 |
| ENSGALG00010015142 | 0.826804852 | 0.263583169 |
| ENSGALG00010015143 | 0.180034975 | 0.112791659 |
| ENSGALG00010015144 | 0.139851858 | 0.111583845 |
| ENSGALG00010015145 | 0.60642909  | 0.050360364 |
| ENSGALG00010015146 | 0.406442211 | 0.009525154 |

|                    |             |             |
|--------------------|-------------|-------------|
| ENSGALG00010015148 | 0.094583584 | 0.268771524 |
| ENSGALG00010015149 | 0.666456187 | 0.032849515 |
| ENSGALG00010015151 | 0.015454029 | 0.11304295  |
| ENSGALG00010015152 | 0.987098677 | 0.29984816  |
| ENSGALG00010015153 | 0.735358445 | 0.196725841 |
| ENSGALG00010015154 | 0.024689244 | 0.135282994 |
| ENSGALG00010015155 | 0.989771755 | 0.368811876 |
| ENSGALG00010015156 | 0.927230125 | 0.42115168  |
| ENSGALG00010015157 | 0.979578856 | 0.327895839 |
| ENSGALG00010015158 | 0.914322564 | 0.301499668 |
| ENSGALG00010015159 | 0.811691561 | 0.293670633 |
| ENSGALG00010015160 | 0.714914258 | 0.222996691 |
| ENSGALG00010015161 | 0.260122675 | 0.323257224 |
| ENSGALG00010015162 | 0.059172591 | 0.157657381 |
| ENSGALG00010015163 | 0.70679409  | 0.104544453 |
| ENSGALG00010015164 | 0.622563869 | 0.148589226 |
| ENSGALG00010015165 | 0.961854358 | 0.411437044 |
| ENSGALG00010015166 | 0.954506812 | 0.328641606 |
| ENSGALG00010015167 | 0.502071194 | 0.193675818 |
| ENSGALG00010015169 | 0.032978828 | 0.093802223 |
| ENSGALG00010015171 | 0.840844081 | 0.339305219 |
| ENSGALG00010015172 | 0.418938362 | 0.096991001 |
| ENSGALG00010015173 | 0.267450208 | 0.132160098 |
| ENSGALG00010015174 | 0.614721021 | 0.369467682 |
| ENSGALG00010015175 | 0.246821213 | 0.085267178 |
| ENSGALG00010015177 | 0.776783554 | 0.319580895 |
| ENSGALG00010015178 | 0.208550923 | 0.676301294 |
| ENSGALG00010015179 | 0.387312444 | 0.236087824 |
| ENSGALG00010015180 | 0.596665191 | 0.299384133 |
| ENSGALG00010015181 | 0.959889878 | 0.414787783 |
| ENSGALG00010015182 | 0.768907045 | 0.260135891 |
| ENSGALG00010015183 | 0.208550923 | 0.676301294 |
| ENSGALG00010015184 | 0.614619421 | 0.238684316 |
| ENSGALG00010015185 | 0.431466585 | 0.01856818  |
| ENSGALG00010015186 | 0.938772863 | 0.255269629 |
| ENSGALG00010015188 | 0.996241272 | 0.336281327 |
| ENSGALG00010015190 | 0.380267332 | 0.109092415 |
| ENSGALG00010015191 | 0.993637404 | 0.303671611 |
| ENSGALG00010015192 | 0.746201627 | 0.39724542  |
| ENSGALG00010015193 | 0.498028662 | 0.484182772 |
| ENSGALG00010015194 | 0.783174544 | 0.291772698 |
| ENSGALG00010015196 | 0.952056362 | 0.347737949 |
| ENSGALG00010015197 | 0.47648737  | 0.176555271 |
| ENSGALG00010015198 | 0.087975919 | 0.13106331  |
| ENSGALG00010015199 | 0.787999533 | 0.056576048 |
| ENSGALG00010015200 | 0.371848469 | 0.232484125 |
| ENSGALG00010015201 | 0.872991517 | 0.293635651 |
| ENSGALG00010015203 | 0.93889693  | 0.472595738 |
| ENSGALG00010015204 | 0.975897137 | 0.343894269 |
| ENSGALG00010015205 | 0.791787263 | 0.300992741 |
| ENSGALG00010015206 | 0.705780389 | 0.259793675 |
| ENSGALG00010015207 | 0.774999488 | 0.425385759 |
| ENSGALG00010015208 | 0.892121546 | 0.257018095 |
| ENSGALG00010015209 | 0.220818482 | 0.205768094 |
| ENSGALG00010015211 | 0.937919436 | 0.367982933 |
| ENSGALG00010015212 | 0.774077153 | 0.273122689 |

|                    |             |             |
|--------------------|-------------|-------------|
| ENSGALG00010015213 | 0.690551291 | 0.153074889 |
| ENSGALG00010015216 | 0.418122213 | 0.062084349 |
| ENSGALG00010015217 | 0.271701261 | 0.072417625 |
| ENSGALG00010015218 | 0.672172247 | 0.252320172 |
| ENSGALG00010015219 | 0.456104745 | 0.133499529 |
| ENSGALG00010015220 | 0.69613153  | 0.205387576 |
| ENSGALG00010015223 | 0.412788748 | 0.349800033 |
| ENSGALG00010015225 | 0.558134002 | 0.002120534 |
| ENSGALG00010015226 | 0.904703035 | 0.595359929 |
| ENSGALG00010015227 | 0.931616772 | 0.250454336 |
| ENSGALG00010015228 | 0.940762049 | 0.424675294 |
| ENSGALG00010015232 | 0.558030867 | 0.222733875 |
| ENSGALG00010015233 | 0.339354177 | 0.176126873 |
| ENSGALG00010015234 | 0.936946488 | 0.385935199 |
| ENSGALG00010015239 | 0.474116977 | 0.124314476 |
| ENSGALG00010015241 | 0.039013067 | 0.082162305 |
| ENSGALG00010015243 | 0.46508423  | 0.19455744  |
| ENSGALG00010015245 | 0.463028763 | 0.087247183 |
| ENSGALG00010015246 | 0.132029222 | 0.406358342 |
| ENSGALG00010015248 | 0.849422031 | 0.269187756 |
| ENSGALG00010015249 | 0.396617227 | 0.102705405 |
| ENSGALG00010015250 | 0.048874854 | 0.177851658 |
| ENSGALG00010015252 | 0.527983806 | 0.102422224 |
| ENSGALG00010015253 | 0.771995446 | 0.291816026 |
| ENSGALG00010015254 | 0.303239222 | 0.029970476 |
| ENSGALG00010015255 | 0.957854233 | 0.240046612 |
| ENSGALG00010015257 | 0.796790073 | 0.25885759  |
| ENSGALG00010015258 | 0.666377935 | 0.102522258 |
| ENSGALG00010015260 | 0.654594078 | 0.070193152 |
| ENSGALG00010015261 | 0.50560779  | 0.252329751 |
| ENSGALG00010015262 | 0.114044697 | 0.189520971 |
| ENSGALG00010015263 | 0.951690253 | 0.241135525 |
| ENSGALG00010015264 | 0.392206929 | 0.143464443 |
| ENSGALG00010015266 | 0.440953629 | 0.143611041 |
| ENSGALG00010015268 | 0.695754295 | 0.504310108 |
| ENSGALG00010015272 | 0.233191245 | 0.230247574 |
| ENSGALG00010015274 | 0.24776858  | 0.152050173 |
| ENSGALG00010015278 | 0.270451009 | 0.090541667 |
| ENSGALG00010015279 | 0.189240572 | 0.04996112  |
| ENSGALG00010015282 | 0.340601308 | 0.064109408 |
| ENSGALG00010015283 | 0.567861724 | 0.170361482 |
| ENSGALG00010015285 | 0.663975443 | 0.115739647 |
| ENSGALG00010015286 | 0.225024331 | 0.108181861 |
| ENSGALG00010015291 | 0.332549612 | 0.140256647 |
| ENSGALG00010015292 | 0.87862238  | 0.324265981 |
| ENSGALG00010015293 | 0.287683915 | 0.813901871 |
| ENSGALG00010015294 | 0.438006218 | 0.824299465 |
| ENSGALG00010015295 | 0.904530018 | 0.307757536 |
| ENSGALG00010015296 | 0.482308272 | 0.2943166   |
| ENSGALG00010015298 | 0.92938457  | 0.303617333 |
| ENSGALG00010015299 | 0.905502281 | 0.254850634 |
| ENSGALG00010015300 | 0.937152272 | 0.30759334  |
| ENSGALG00010015302 | 0.300479476 | 0.115860765 |
| ENSGALG00010015303 | 0.288888201 | 0.045619874 |
| ENSGALG00010015306 | 0.394428897 | 0.395496966 |
| ENSGALG00010015310 | 0.98659564  | 0.311163284 |

|                    |             |             |
|--------------------|-------------|-------------|
| ENSGALG00010015311 | 0.374867962 | 0.29811939  |
| ENSGALG00010015312 | 0.445433687 | 0.060797523 |
| ENSGALG00010015314 | 0.930388823 | 0.392231488 |
| ENSGALG00010015315 | 0.234565587 | 0.016907675 |
| ENSGALG00010015317 | 0.123663058 | 0.029069875 |
| ENSGALG00010015318 | 0.928454843 | 0.348654534 |
| ENSGALG00010015319 | 0.372796048 | 0.167811456 |
| ENSGALG00010015320 | 0.458485716 | 0.154552907 |
| ENSGALG00010015321 | 0.166398148 | 0.161280892 |
| ENSGALG00010015322 | 0.07225596  | 0.582335108 |
| ENSGALG00010015323 | 0.350705    | 0.102583314 |
| ENSGALG00010015325 | 0.234826202 | 0.098542803 |
| ENSGALG00010015327 | 0.932473766 | 0.39359942  |
| ENSGALG00010015328 | 0.294527392 | 0.082168456 |
| ENSGALG00010015329 | 0.77067115  | 0.36535249  |
| ENSGALG00010015330 | 0.215246452 | 0.39899041  |
| ENSGALG00010015333 | 0.615148806 | 0.02000199  |
| ENSGALG00010015334 | 0.521301754 | 0.381497611 |
| ENSGALG00010015335 | 0.378821885 | 0.065964134 |
| ENSGALG00010015336 | 0.080223077 | 0.059688596 |
| ENSGALG00010015337 | 0.041573802 | 0.219004385 |
| ENSGALG00010015338 | 0.88811925  | 0.263254757 |
| ENSGALG00010015339 | 0.313104699 | 0.151578969 |
| ENSGALG00010015343 | 0.979465251 | 0.344930578 |
| ENSGALG00010015345 | 0.44208044  | 0.146690892 |
| ENSGALG00010015346 | 0.443372537 | 0.223310699 |
| ENSGALG00010015347 | 0.32707355  | 0.281479387 |
| ENSGALG00010015348 | 0.931191731 | 0.269271036 |
| ENSGALG00010015349 | 0.366810591 | 0.293049106 |
| ENSGALG00010015350 | 0.265558089 | 0.028821141 |
| ENSGALG00010015351 | 0.205920741 | 0.227294065 |
| ENSGALG00010015353 | 0.73073309  | 0.315067929 |
| ENSGALG00010015356 | 0.772965765 | 0.009462731 |
| ENSGALG00010015357 | 0.385953062 | 0.133261917 |
| ENSGALG00010015362 | 0.951482575 | 0.246736094 |
| ENSGALG00010015364 | 0.754787621 | 0.01581206  |
| ENSGALG00010015365 | 0.095545711 | 0.195851575 |
| ENSGALG00010015366 | 0.35194972  | 0.140777882 |
| ENSGALG00010015368 | 0.673834264 | 0.497774557 |
| ENSGALG00010015370 | 0.980292638 | 0.293320239 |
| ENSGALG00010015371 | 0.225950931 | 0.304109222 |
| ENSGALG00010015372 | 0.008620651 | 0.150707699 |
| ENSGALG00010015374 | 0.246447285 | 0.071226122 |
| ENSGALG00010015375 | 0.764522381 | 0.135937547 |
| ENSGALG00010015376 | 0.219311648 | 0.194349778 |
| ENSGALG00010015378 | 0.37671603  | 0.150307264 |
| ENSGALG00010015380 | 0.270451009 | 0.090541667 |
| ENSGALG00010015382 | 0.476003345 | 0.18239726  |
| ENSGALG00010015384 | 0.970701667 | 0.24501383  |
| ENSGALG00010015386 | 0.914670939 | 0.162956437 |
| ENSGALG00010015387 | 0.266137114 | 0.107784983 |
| ENSGALG00010015388 | 0.501751166 | 0.237288483 |
| ENSGALG00010015389 | 0.580082544 | 0.154539226 |
| ENSGALG00010015390 | 0.491224668 | 0.107972585 |
| ENSGALG00010015391 | 0.629403017 | 0.230123838 |
| ENSGALG00010015392 | 0.846777631 | 0.30113299  |

|                    |             |             |
|--------------------|-------------|-------------|
| ENSGALG00010015393 | 0.628783    | 0.588441226 |
| ENSGALG00010015394 | 0.930432676 | 0.156773654 |
| ENSGALG00010015396 | 0.179975995 | 0.055700153 |
| ENSGALG00010015397 | 0.706640474 | 0.23544162  |
| ENSGALG00010015400 | 0.269272437 | 0.073182666 |
| ENSGALG00010015401 | 0.90340499  | 0.180581966 |
| ENSGALG00010015402 | 0.317364765 | 0.164256295 |
| ENSGALG00010015403 | 0.200570274 | 0.091667991 |
| ENSGALG00010015404 | 0.449876277 | 0.171691912 |
| ENSGALG00010015406 | 0.3194288   | 0.141230071 |
| ENSGALG00010015407 | 0.925903791 | 0.220787726 |
| ENSGALG00010015409 | 0.709498359 | 0.38073381  |
| ENSGALG00010015410 | 0.496777251 | 0.026902031 |
| ENSGALG00010015411 | 0.223275225 | 0.21086075  |
| ENSGALG00010015412 | 0.116753802 | 0.216599268 |
| ENSGALG00010015413 | 0.951043286 | 0.270338305 |
| ENSGALG00010015414 | 0.396365709 | 0.157137627 |
| ENSGALG00010015415 | 0.017411055 | 0.13007104  |
| ENSGALG00010015416 | 0.973174328 | 0.336151439 |
| ENSGALG00010015417 | 0.441258972 | 0.224404481 |
| ENSGALG00010015418 | 0.3212722   | 0.082708406 |
| ENSGALG00010015419 | 0.265558089 | 0.028821141 |
| ENSGALG00010015422 | 0.30559399  | 0.04288704  |
| ENSGALG00010015423 | 0.37526789  | 0.118093036 |
| ENSGALG00010015424 | 0.341200679 | 0.235750727 |
| ENSGALG00010015426 | 0.40308773  | 0.146014129 |
| ENSGALG00010015430 | 0.970922869 | 0.310110876 |
| ENSGALG00010015431 | 0.944804339 | 0.377935235 |
| ENSGALG00010015436 | 0.943781875 | 0.297448274 |
| ENSGALG00010015438 | 0.29624688  | 0.221994937 |
| ENSGALG00010015439 | 0.050164932 | 0.210392742 |
| ENSGALG00010015440 | 0.941731027 | 0.290999182 |
| ENSGALG00010015441 | 0.187182325 | 0.228815171 |
| ENSGALG00010015443 | 0.75708374  | 0.219464398 |
| ENSGALG00010015449 | 0.727069718 | 0.312569169 |
| ENSGALG00010015456 | 0.82853944  | 0.461782908 |
| ENSGALG00010015457 | 0.183775481 | 0.135894353 |
| ENSGALG00010015458 | 0.012746987 | 0.420385053 |
| ENSGALG00010015461 | 0.804501582 | 0.325970809 |
| ENSGALG00010015466 | 0.952189127 | 0.334688745 |
| ENSGALG00010015467 | 0.031329216 | 0.144699932 |
| ENSGALG00010015468 | 0.963353926 | 0.357952135 |
| ENSGALG00010015469 | 0.769297981 | 0.306093153 |
| ENSGALG00010015471 | 0.992580378 | 0.340752049 |
| ENSGALG00010015472 | 0.949130076 | 0.230681946 |
| ENSGALG00010015474 | 0.428249613 | 0.256139924 |
| ENSGALG00010015475 | 0.303894092 | 0.04073523  |
| ENSGALG00010015476 | 0.748750829 | 0.377438035 |
| ENSGALG00010015477 | 0.522653581 | 0.03076589  |
| ENSGALG00010015478 | 0.04258163  | 0.065370901 |
| ENSGALG00010015479 | 0.325566907 | 0.157344775 |
| ENSGALG00010015480 | 0.652236755 | 0.200214783 |
| ENSGALG00010015481 | 0.840227046 | 0.451646835 |
| ENSGALG00010015483 | 0.952297798 | 0.294129458 |
| ENSGALG00010015484 | 0.932941463 | 0.310729614 |
| ENSGALG00010015485 | 0.777844557 | 0.470888325 |

|                    |             |             |
|--------------------|-------------|-------------|
| ENSGALG00010015486 | 0.976349823 | 0.337757337 |
| ENSGALG00010015487 | 0.847071896 | 0.292001997 |
| ENSGALG00010015489 | 0.571008411 | 0.152873466 |
| ENSGALG00010015490 | 0.750828315 | 0.332724171 |
| ENSGALG00010015491 | 0.798625639 | 0.131578225 |
| ENSGALG00010015493 | 0.978503316 | 0.397713041 |
| ENSGALG00010015494 | 0.805498415 | 0.473484526 |
| ENSGALG00010015495 | 0.812765127 | 0.2741179   |
| ENSGALG00010015498 | 0.37923329  | 0.504846861 |
| ENSGALG00010015499 | 0.448478106 | 0.179792629 |
| ENSGALG00010015501 | 0.314182873 | 0.070723306 |
| ENSGALG00010015502 | 0.189240572 | 0.04996112  |
| ENSGALG00010015505 | 0.93486157  | 0.23351405  |
| ENSGALG00010015506 | 0.51084206  | 0.720295104 |
| ENSGALG00010015507 | 0.733480734 | 0.180581946 |
| ENSGALG00010015508 | 0.876179475 | 0.269983199 |
| ENSGALG00010015511 | 0.503679165 | 0.483180131 |
| ENSGALG00010015513 | 0.371659973 | 0.137371432 |
| ENSGALG00010015514 | 0.157098351 | 0.195363428 |
| ENSGALG00010015516 | 0.070712624 | 0.085411293 |
| ENSGALG00010015518 | 0.927122533 | 0.326552527 |
| ENSGALG00010015519 | 0.544366024 | 0.042888614 |
| ENSGALG00010015520 | 0.989255863 | 0.302694109 |
| ENSGALG00010015521 | 0.619567318 | 0.350524369 |
| ENSGALG00010015522 | 0.936827318 | 0.339547367 |
| ENSGALG00010015523 | 0.858342432 | 0.257762071 |
| ENSGALG00010015524 | 0.750350987 | 0.109843978 |
| ENSGALG00010015525 | 0.93720358  | 0.296923975 |
| ENSGALG00010015526 | 0.460864324 | 0.20908277  |
| ENSGALG00010015527 | 0.146353876 | 0.171027412 |
| ENSGALG00010015528 | 0.505011811 | 0.188959509 |
| ENSGALG00010015531 | 0.39190877  | 0.131701825 |
| ENSGALG00010015532 | 0.843616841 | 0.269971349 |
| ENSGALG00010015533 | 0.983297658 | 0.336574789 |
| ENSGALG00010015534 | 0.103840257 | 0.151401781 |
| ENSGALG00010015535 | 0.155637439 | 0.051090579 |
| ENSGALG00010015537 | 0.390218599 | 0.089311719 |
| ENSGALG00010015539 | 0.649561588 | 0.304904556 |
| ENSGALG00010015540 | 0.908097822 | 0.205867144 |
| ENSGALG00010015541 | 0.01125475  | 0.242609522 |
| ENSGALG00010015542 | 0.940569546 | 0.420449333 |
| ENSGALG00010015543 | 0.43829715  | 0.089013026 |
| ENSGALG00010015544 | 0.956624938 | 0.391927945 |
| ENSGALG00010015545 | 0.452868476 | 0.101098737 |
| ENSGALG00010015546 | 0.468227249 | 0.169945428 |
| ENSGALG00010015547 | 0.123715291 | 0.101269724 |
| ENSGALG00010015551 | 0.927392503 | 0.3483985   |
| ENSGALG00010015553 | 0.845725485 | 0.286602538 |
| ENSGALG00010015554 | 0.948613477 | 0.324880186 |
| ENSGALG00010015555 | 0.877653251 | 0.423307216 |
| ENSGALG00010015556 | 0.266137114 | 0.107784983 |
| ENSGALG00010015557 | 0.526829689 | 0.178638714 |
| ENSGALG00010015558 | 0.603906421 | 0.34393111  |
| ENSGALG00010015559 | 0.384359772 | 0.116398661 |
| ENSGALG00010015560 | 0.821594192 | 0.248321101 |
| ENSGALG00010015561 | 0.650095249 | 0.153789455 |



|                    |             |             |
|--------------------|-------------|-------------|
| ENSGALG00010015562 | 0.755410085 | 0.316906446 |
| ENSGALG00010015563 | 0.696542809 | 0.309579282 |
| ENSGALG00010015564 | 0.840613186 | 0.379385162 |
| ENSGALG00010015566 | 0.270451009 | 0.090541667 |
| ENSGALG00010015567 | 0.480513849 | 0.081742122 |
| ENSGALG00010015568 | 0.382775976 | 0.1757733   |
| ENSGALG00010015569 | 0.219569429 | 0.22587284  |
| ENSGALG00010015570 | 0.991825267 | 0.338629571 |
| ENSGALG00010015571 | 0.722819041 | 0.486304695 |
| ENSGALG00010015573 | 0.940137005 | 0.303813673 |
| ENSGALG00010015574 | 0.191574773 | 0.000963986 |
| ENSGALG00010015576 | 0.472637348 | 0.266062131 |
| ENSGALG00010015577 | 0.376148692 | 0.091164598 |
| ENSGALG00010015580 | 0.931979244 | 0.275615532 |
| ENSGALG00010015582 | 0.940506858 | 0.300831959 |
| ENSGALG00010015583 | 0.995328057 | 0.305121919 |
| ENSGALG00010015584 | 0.150085279 | 0.378465762 |
| ENSGALG00010015585 | 0.795923895 | 0.264880429 |
| ENSGALG00010015586 | 0.219386918 | 0.079388121 |
| ENSGALG00010015587 | 0.386254376 | 0.161451439 |
| ENSGALG00010015588 | 0.073732153 | 0.097669803 |
| ENSGALG00010015589 | 0.955620307 | 0.292992502 |
| ENSGALG00010015590 | 0.215256434 | 0.218672447 |
| ENSGALG00010015592 | 0.628575001 | 0.314169702 |
| ENSGALG00010015593 | 0.067621059 | 0.167686639 |
| ENSGALG00010015594 | 0.911060615 | 0.33720526  |
| ENSGALG00010015596 | 0.677291081 | 0.295865878 |
| ENSGALG00010015599 | 0.871038744 | 0.496603493 |
| ENSGALG00010015600 | 0.377096693 | 0.134016806 |
| ENSGALG00010015603 | 0.967838402 | 0.332235708 |
| ENSGALG00010015605 | 0.628052373 | 0.058087595 |
| ENSGALG00010015606 | 0.40691561  | 0.100611437 |
| ENSGALG00010015607 | 0.350670686 | 0.28946165  |
| ENSGALG00010015608 | 0.39035496  | 0.270804034 |
| ENSGALG00010015609 | 0.240644424 | 0.208767635 |
| ENSGALG00010015610 | 0.988674944 | 0.31067105  |
| ENSGALG00010015613 | 0.218239996 | 0.292028106 |
| ENSGALG00010015614 | 0.02031629  | 0.107383513 |
| ENSGALG00010015615 | 0.224449644 | 0.273689373 |
| ENSGALG00010015616 | 0.99142721  | 0.340012643 |
| ENSGALG00010015617 | 0.738205826 | 0.02985613  |
| ENSGALG00010015618 | 0.539375996 | 0.184403832 |
| ENSGALG00010015620 | 0.972190157 | 0.274995898 |
| ENSGALG00010015621 | 0.927246879 | 0.195129751 |
| ENSGALG00010015622 | 0.279729665 | 0.482251581 |
| ENSGALG00010015623 | 0.489825871 | 0.517747953 |
| ENSGALG00010015624 | 0.971184531 | 0.242729016 |
| ENSGALG00010015625 | 0.827227507 | 0.277870705 |
| ENSGALG00010015626 | 0.015005683 | 0.32469751  |
| ENSGALG00010015627 | 0.327036234 | 0.031202811 |
| ENSGALG00010015628 | 0.952369557 | 0.207677057 |
| ENSGALG00010015629 | 0.397400334 | 0.1702444   |
| ENSGALG00010015630 | 0.567107104 | 0.051764356 |
| ENSGALG00010015631 | 0.572367007 | 0.162614151 |
| ENSGALG00010015632 | 0.920369152 | 0.326012237 |
| ENSGALG00010015633 | 0.791791066 | 0.424592878 |

|                    |             |             |
|--------------------|-------------|-------------|
| ENSGALG00010015635 | 0.770443695 | 0.199370644 |
| ENSGALG00010015636 | 0.987213775 | 0.313371419 |
| ENSGALG00010015637 | 0.911447213 | 0.295113171 |
| ENSGALG00010015640 | 0.724289608 | 0.138918086 |
| ENSGALG00010015641 | 0.617798173 | 0.026016793 |
| ENSGALG00010015643 | 0.641123156 | 0.47917747  |
| ENSGALG00010015644 | 0.18401263  | 0.070193553 |
| ENSGALG00010015645 | 0.948978142 | 0.321666576 |
| ENSGALG00010015647 | 0.574265051 | 0.317297889 |
| ENSGALG00010015648 | 0.264239718 | 0.073427965 |
| ENSGALG00010015649 | 0.092293281 | 0.247321007 |
| ENSGALG00010015650 | 0.388404098 | 0.148641621 |
| ENSGALG00010015653 | 0.870652211 | 0.390487493 |
| ENSGALG00010015654 | 0.229443295 | 0.170412511 |
| ENSGALG00010015655 | 0.479010373 | 0.036739982 |
| ENSGALG00010015656 | 0.742068881 | 0.107116936 |
| ENSGALG00010015660 | 0.947682089 | 0.339481469 |
| ENSGALG00010015663 | 0.482145283 | 0.177847326 |
| ENSGALG00010015664 | 0.607040673 | 0.242668684 |
| ENSGALG00010015666 | 0.469177354 | 0.169929321 |
| ENSGALG00010015667 | 0.364871524 | 0.123582396 |
| ENSGALG00010015668 | 0.965618523 | 0.437687099 |
| ENSGALG00010015669 | 0.884610181 | 0.356095515 |
| ENSGALG00010015670 | 0.411893538 | 0.021669246 |
| ENSGALG00010015671 | 0.269990618 | 0.090697252 |
| ENSGALG00010015672 | 0.154035871 | 0.017573108 |
| ENSGALG00010015673 | 0.930573256 | 0.435095797 |
| ENSGALG00010015674 | 0.810328307 | 0.338307569 |
| ENSGALG00010015676 | 0.547132379 | 0.211320092 |
| ENSGALG00010015677 | 0.467380829 | 0.3175207   |
| ENSGALG00010015679 | 0.323858548 | 0.343474408 |
| ENSGALG00010015680 | 0.71119465  | 0.215198889 |
| ENSGALG00010015682 | 0.22804884  | 0.128559605 |
| ENSGALG00010015684 | 0.415155335 | 0.097831039 |
| ENSGALG00010015685 | 0.067820563 | 0.132238412 |
| ENSGALG00010015686 | 0.95797497  | 0.254974496 |
| ENSGALG00010015687 | 0.934743716 | 0.310077369 |
| ENSGALG00010015691 | 0.988189868 | 0.350242784 |
| ENSGALG00010015693 | 0.937691982 | 0.282592414 |
| ENSGALG00010015694 | 0.37479064  | 0.077949893 |
| ENSGALG00010015695 | 0.975001599 | 0.268687537 |
| ENSGALG00010015696 | 0.266137114 | 0.107784983 |
| ENSGALG00010015697 | 0.88866038  | 0.293966385 |
| ENSGALG00010015698 | 0.818060676 | 0.136718322 |
| ENSGALG00010015700 | 0.306269874 | 0.488490028 |
| ENSGALG00010015701 | 0.765588748 | 0.277434282 |
| ENSGALG00010015702 | 0.450194842 | 0.071698579 |
| ENSGALG00010015703 | 0.940681022 | 0.315154953 |
| ENSGALG00010015705 | 0.015356881 | 0.221156745 |
| ENSGALG00010015706 | 0.545057    | 0.058394904 |
| ENSGALG00010015709 | 0.577329906 | 0.338048169 |
| ENSGALG00010015710 | 0.09323381  | 0.14790944  |
| ENSGALG00010015711 | 0.991234186 | 0.396966641 |
| ENSGALG00010015714 | 0.975437953 | 0.332064529 |
| ENSGALG00010015716 | 0.962343927 | 0.297048089 |
| ENSGALG00010015718 | 0.431553612 | 0.192661548 |

|                    |             |             |
|--------------------|-------------|-------------|
| ENSGALG00010015719 | 0.87295564  | 0.37542866  |
| ENSGALG00010015721 | 0.483044133 | 0.200897137 |
| ENSGALG00010015722 | 0.577932677 | 0.204867016 |
| ENSGALG00010015723 | 0.395556858 | 0.102965232 |
| ENSGALG00010015725 | 0.264239718 | 0.073427965 |
| ENSGALG00010015728 | 0.41983171  | 0.288568924 |
| ENSGALG00010015729 | 0.712169999 | 0.289587992 |
| ENSGALG00010015730 | 0.89590453  | 0.285830281 |
| ENSGALG00010015731 | 0.89566972  | 0.435874208 |
| ENSGALG00010015732 | 0.90711206  | 0.325222551 |
| ENSGALG00010015733 | 0.971142215 | 0.370539915 |
| ENSGALG00010015734 | 0.233337379 | 0.002929328 |
| ENSGALG00010015735 | 0.870976367 | 0.29001576  |
| ENSGALG00010015736 | 0.12691976  | 0.23780547  |
| ENSGALG00010015737 | 0.0510309   | 0.078661096 |
| ENSGALG00010015738 | 0.81198594  | 0.077874235 |
| ENSGALG00010015742 | 0.969967756 | 0.29883654  |
| ENSGALG00010015743 | 0.583676413 | 0.228984121 |
| ENSGALG00010015744 | 0.408109737 | 0.157233138 |
| ENSGALG00010015745 | 0.482335527 | 0.147132467 |
| ENSGALG00010015746 | 0.520605378 | 0.435508582 |
| ENSGALG00010015747 | 0.754256363 | 0.281081381 |
| ENSGALG00010015749 | 0.746245098 | 0.478011184 |
| ENSGALG00010015750 | 0.416169558 | 0.2793359   |
| ENSGALG00010015751 | 0.416007421 | 0.362106739 |
| ENSGALG00010015752 | 0.926407086 | 0.284296921 |
| ENSGALG00010015753 | 0.542411778 | 0.456876762 |
| ENSGALG00010015756 | 0.816642054 | 0.305534847 |
| ENSGALG00010015757 | 0.970065325 | 0.36111586  |
| ENSGALG00010015758 | 0.469212831 | 0.389117892 |
| ENSGALG00010015759 | 0.826896568 | 0.086081902 |
| ENSGALG00010015762 | 0.37552597  | 0.101692059 |
| ENSGALG00010015764 | 0.285992397 | 0.373119687 |
| ENSGALG00010015765 | 0.22554445  | 0.02819802  |
| ENSGALG00010015766 | 0.922316143 | 0.333695934 |
| ENSGALG00010015769 | 0.845037666 | 0.268195939 |
| ENSGALG00010015771 | 0.079762376 | 0.384839794 |
| ENSGALG00010015772 | 0.317994761 | 0.302132706 |
| ENSGALG00010015773 | 0.435249353 | 0.209258117 |
| ENSGALG00010015774 | 0.867021418 | 0.338581822 |
| ENSGALG00010015776 | 0.155965215 | 0.152430822 |
| ENSGALG00010015778 | 0.920180145 | 0.419546759 |
| ENSGALG00010015780 | 0.392894344 | 0.133607003 |
| ENSGALG00010015781 | 0.483761819 | 0.14768566  |
| ENSGALG00010015782 | 0.743568954 | 0.063902705 |
| ENSGALG00010015785 | 0.672183344 | 0.420440896 |
| ENSGALG00010015787 | 0.799033558 | 0.242705882 |
| ENSGALG00010015788 | 0.373640438 | 0.161243791 |
| ENSGALG00010015789 | 0.270451009 | 0.090541667 |
| ENSGALG00010015790 | 0.56591591  | 0.278242648 |
| ENSGALG00010015791 | 0.588483485 | 0.08307131  |
| ENSGALG00010015792 | 0.975807272 | 0.244794705 |
| ENSGALG00010015793 | 0.388550926 | 0.184246236 |
| ENSGALG00010015794 | 0.308844183 | 0.110939188 |
| ENSGALG00010015795 | 0.760967977 | 0.259166587 |
| ENSGALG00010015796 | 0.742401652 | 0.197685779 |

|                    |             |             |
|--------------------|-------------|-------------|
| ENSGALG00010015797 | 0.859684337 | 0.305283592 |
| ENSGALG00010015798 | 0.917051463 | 0.25662841  |
| ENSGALG00010015799 | 0.096860439 | 0.341799876 |
| ENSGALG00010015800 | 0.987706584 | 0.319169375 |
| ENSGALG00010015801 | 0.219293666 | 0.049108603 |
| ENSGALG00010015802 | 0.821390218 | 0.323876199 |
| ENSGALG00010015803 | 0.669308604 | 0.028794303 |
| ENSGALG00010015804 | 0.256887088 | 0.302367881 |
| ENSGALG00010015806 | 0.266137114 | 0.107784983 |
| ENSGALG00010015807 | 0.628366251 | 0.038245468 |
| ENSGALG00010015808 | 0.463783118 | 0.149693479 |
| ENSGALG00010015809 | 0.822102007 | 0.363834224 |
| ENSGALG00010015810 | 0.541128613 | 0.149408069 |
| ENSGALG00010015811 | 0.877875365 | 0.307203264 |
| ENSGALG00010015813 | 0.929539101 | 0.281562612 |
| ENSGALG00010015814 | 0.963766347 | 0.35948718  |
| ENSGALG00010015815 | 0.230766395 | 0.172305962 |
| ENSGALG00010015816 | 0.327496192 | 0.044761675 |
| ENSGALG00010015817 | 0.952927459 | 0.273872557 |
| ENSGALG00010015818 | 0.530956342 | 0.24764282  |
| ENSGALG00010015819 | 0.603015529 | 0.041846011 |
| ENSGALG00010015820 | 0.751368038 | 0.326999087 |
| ENSGALG00010015821 | 0.488860496 | 0.212264849 |
| ENSGALG00010015822 | 0.489121629 | 0.131571089 |
| ENSGALG00010015823 | 0.958778843 | 0.324226427 |
| ENSGALG00010015824 | 0.323105438 | 0.173197139 |
| ENSGALG00010015825 | 0.904046355 | 0.49703093  |
| ENSGALG00010015827 | 0.433358478 | 0.454502492 |
| ENSGALG00010015829 | 0.878225772 | 0.066134041 |
| ENSGALG00010015830 | 0.271701261 | 0.072417625 |
| ENSGALG00010015831 | 0.976928603 | 0.283632967 |
| ENSGALG00010015832 | 0.938259791 | 0.316151306 |
| ENSGALG00010015833 | 0.044969106 | 0.225756118 |
| ENSGALG00010015834 | 0.65632332  | 0.116467077 |
| ENSGALG00010015835 | 0.043659357 | 0.108092216 |
| ENSGALG00010015836 | 0.064166065 | 0.566329296 |
| ENSGALG00010015837 | 0.954740742 | 0.234948801 |
| ENSGALG00010015839 | 0.95808357  | 0.295517081 |
| ENSGALG00010015840 | 0.572845382 | 0.258869917 |
| ENSGALG00010015841 | 0.716823214 | 0.465978752 |
| ENSGALG00010015842 | 0.265558089 | 0.028821141 |
| ENSGALG00010015843 | 0.052124379 | 0.605798082 |
| ENSGALG00010015844 | 0.8386183   | 0.126766841 |
| ENSGALG00010015845 | 0.942462263 | 0.24357382  |
| ENSGALG00010015846 | 0.289661925 | 0.000223194 |
| ENSGALG00010015847 | 0.09147966  | 0.071568051 |
| ENSGALG00010015848 | 0.853818065 | 0.223234065 |
| ENSGALG00010015850 | 0.33717368  | 0.193442029 |
| ENSGALG00010015852 | 0.943290432 | 0.326606766 |
| ENSGALG00010015855 | 0.879853632 | 0.30630345  |
| ENSGALG00010015856 | 0.966446506 | 0.246754226 |
| ENSGALG00010015857 | 0.200570274 | 0.091667991 |
| ENSGALG00010015858 | 0.947711879 | 0.323030405 |
| ENSGALG00010015860 | 0.065670831 | 0.18287313  |
| ENSGALG00010015861 | 0.963711628 | 0.339239591 |
| ENSGALG00010015862 | 0.929836596 | 0.464617144 |

|                    |             |             |
|--------------------|-------------|-------------|
| ENSGALG00010015863 | 0.011074683 | 0.420588111 |
| ENSGALG00010015865 | 0.882312306 | 0.342325798 |
| ENSGALG00010015866 | 0.104729442 | 0.050076474 |
| ENSGALG00010015867 | 0.920548719 | 0.404871988 |
| ENSGALG00010015868 | 0.233036103 | 0.331083723 |
| ENSGALG00010015869 | 0.913713688 | 0.360152878 |
| ENSGALG00010015870 | 0.957352353 | 0.276153033 |
| ENSGALG00010015871 | 0.449621013 | 0.468709091 |
| ENSGALG00010015872 | 0.243187225 | 0.24776988  |
| ENSGALG00010015873 | 0.710240385 | 0.016597102 |
| ENSGALG00010015874 | 0.665925693 | 0.023310875 |
| ENSGALG00010015875 | 0.974890461 | 0.300242823 |
| ENSGALG00010015876 | 0.505628957 | 0.183652593 |
| ENSGALG00010015877 | 0.56337362  | 0.282257147 |
| ENSGALG00010015878 | 0.583416119 | 0.122759513 |
| ENSGALG00010015879 | 0.502922234 | 0.03208718  |
| ENSGALG00010015881 | 0.926598603 | 0.170187632 |
| ENSGALG00010015883 | 0.541904204 | 0.539011532 |
| ENSGALG00010015886 | 0.935107787 | 0.233277877 |
| ENSGALG00010015887 | 0.813057541 | 0.205342295 |
| ENSGALG00010015888 | 0.392206929 | 0.143464443 |
| ENSGALG00010015889 | 0.97041813  | 0.26379729  |
| ENSGALG00010015892 | 0.154867609 | 0.13140084  |
| ENSGALG00010015893 | 0.96577922  | 0.44901822  |
| ENSGALG00010015894 | 0.968598355 | 0.295668942 |
| ENSGALG00010015895 | 0.895683702 | 0.341284789 |
| ENSGALG00010015896 | 0.494663885 | 0.070182632 |
| ENSGALG00010015897 | 0.271701261 | 0.072417625 |
| ENSGALG00010015898 | 0.815733162 | 0.363119988 |
| ENSGALG00010015899 | 0.946326873 | 0.41012017  |
| ENSGALG00010015900 | 0.816800526 | 0.326525182 |
| ENSGALG00010015901 | 0.044515167 | 0.113439077 |
| ENSGALG00010015902 | 0.906614367 | 0.249859614 |
| ENSGALG00010015904 | 0.937232648 | 0.340973595 |
| ENSGALG00010015905 | 0.965071951 | 0.277268924 |
| ENSGALG00010015906 | 0.028559198 | 0.363224209 |
| ENSGALG00010015908 | 0.536154111 | 0.480254771 |
| ENSGALG00010015909 | 0.98911239  | 0.323250151 |
| ENSGALG00010015910 | 0.425008326 | 0.334624978 |
| ENSGALG00010015911 | 0.024032732 | 0.04687212  |
| ENSGALG00010015912 | 0.121870983 | 0.37074683  |
| ENSGALG00010015913 | 0.793803355 | 0.16248863  |
| ENSGALG00010015914 | 0.918446796 | 0.375045717 |
| ENSGALG00010015916 | 0.923952553 | 0.168362687 |
| ENSGALG00010015917 | 0.708635169 | 0.202198295 |
| ENSGALG00010015918 | 0.447143733 | 0.496786036 |
| ENSGALG00010015919 | 0.45202616  | 0.044117872 |
| ENSGALG00010015921 | 0.982218765 | 0.356507235 |
| ENSGALG00010015923 | 0.971008108 | 0.363165715 |
| ENSGALG00010015927 | 0.82605348  | 0.412321465 |
| ENSGALG00010015928 | 0.459599422 | 0.198601935 |
| ENSGALG00010015929 | 0.985435613 | 0.305182509 |
| ENSGALG00010015931 | 0.984371967 | 0.238060149 |
| ENSGALG00010015932 | 0.45244244  | 0.001177905 |
| ENSGALG00010015934 | 0.575160268 | 0.167347099 |
| ENSGALG00010015935 | 0.986091515 | 0.322264834 |

|                    |             |             |
|--------------------|-------------|-------------|
| ENSGALG00010015936 | 0.863846097 | 0.314008088 |
| ENSGALG00010015937 | 0.879049644 | 0.264171797 |
| ENSGALG00010015939 | 0.927969779 | 0.385366822 |
| ENSGALG00010015940 | 0.388571781 | 0.151666204 |
| ENSGALG00010015942 | 0.853735869 | 0.279009834 |
| ENSGALG00010015943 | 0.450104737 | 0.172335588 |
| ENSGALG00010015946 | 0.5905019   | 0.365551696 |
| ENSGALG00010015951 | 0.951406552 | 0.350853777 |
| ENSGALG00010015952 | 0.270451009 | 0.090541667 |
| ENSGALG00010015953 | 0.152271242 | 0.081723275 |
| ENSGALG00010015954 | 0.732691444 | 0.207050588 |
| ENSGALG00010015955 | 0.842221461 | 0.340037603 |
| ENSGALG00010015957 | 0.968747155 | 0.287084866 |
| ENSGALG00010015958 | 0.807681228 | 0.270785519 |
| ENSGALG00010015959 | 0.962144542 | 0.302747224 |
| ENSGALG00010015960 | 0.893872951 | 0.337227998 |
| ENSGALG00010015961 | 0.711492962 | 0.06668915  |
| ENSGALG00010015963 | 0.777981912 | 0.437865038 |
| ENSGALG00010015964 | 0.566136218 | 0.235903171 |
| ENSGALG00010015965 | 0.354243613 | 0.162759819 |
| ENSGALG00010015967 | 0.174926759 | 0.266538787 |
| ENSGALG00010015968 | 0.219049348 | 0.375294351 |
| ENSGALG00010015970 | 0.904544111 | 0.452997219 |
| ENSGALG00010015971 | 0.583979397 | 0.23535048  |
| ENSGALG00010015972 | 0.204262592 | 0.418689276 |
| ENSGALG00010015973 | 0.743112664 | 0.252436153 |
| ENSGALG00010015974 | 0.895121723 | 0.319362928 |
| ENSGALG00010015975 | 0.937844571 | 0.329574679 |
| ENSGALG00010015976 | 0.481606469 | 0.120553617 |
| ENSGALG00010015977 | 0.017946301 | 0.123217195 |
| ENSGALG00010015978 | 0.384332656 | 0.113021677 |
| ENSGALG00010015979 | 0.971887455 | 0.396993832 |
| ENSGALG00010015980 | 0.665948712 | 0.417189323 |
| ENSGALG00010015981 | 0.384165008 | 0.165101073 |
| ENSGALG00010015983 | 0.807088569 | 0.415807775 |
| ENSGALG00010015984 | 0.982338871 | 0.343467398 |
| ENSGALG00010015985 | 0.645072317 | 0.044291338 |
| ENSGALG00010015986 | 0.991242058 | 0.325898968 |
| ENSGALG00010015987 | 0.722586489 | 0.403935193 |
| ENSGALG00010015988 | 0.140537457 | 0.874033653 |
| ENSGALG00010015989 | 0.705526841 | 0.166721381 |
| ENSGALG00010015990 | 0.183539761 | 0.191827542 |
| ENSGALG00010015992 | 0.868271651 | 0.112958456 |
| ENSGALG00010015993 | 0.40308773  | 0.146014129 |
| ENSGALG00010015994 | 0.695999801 | 0.135641895 |
| ENSGALG00010016001 | 0.258959909 | 0.095870072 |
| ENSGALG00010016002 | 0.636191667 | 0.195200254 |
| ENSGALG00010016004 | 0.896709346 | 0.464632526 |
| ENSGALG00010016005 | 0.525295177 | 0.328372109 |
| ENSGALG00010016006 | 0.63521956  | 0.226888105 |
| ENSGALG00010016008 | 0.108595938 | 0.155410534 |
| ENSGALG00010016009 | 0.72673248  | 0.216249646 |
| ENSGALG00010016010 | 0.054298359 | 0.498888325 |
| ENSGALG00010016011 | 0.936398638 | 0.334852521 |
| ENSGALG00010016012 | 0.29169373  | 0.221115931 |
| ENSGALG00010016013 | 0.050070995 | 0.079130983 |

|                    |             |             |
|--------------------|-------------|-------------|
| ENSGALG00010016014 | 0.821426253 | 0.256801182 |
| ENSGALG00010016015 | 0.971946677 | 0.312617167 |
| ENSGALG00010016016 | 0.938651127 | 0.271322963 |
| ENSGALG00010016017 | 0.95338468  | 0.296436649 |
| ENSGALG00010016018 | 0.329744371 | 0.371370966 |
| ENSGALG00010016020 | 0.200570274 | 0.091667991 |
| ENSGALG00010016021 | 0.319349856 | 0.37353642  |
| ENSGALG00010016022 | 0.126969977 | 0.169747044 |
| ENSGALG00010016023 | 0.444710566 | 0.414277856 |
| ENSGALG00010016024 | 0.358793093 | 0.212812756 |
| ENSGALG00010016025 | 0.915807016 | 0.344278123 |
| ENSGALG00010016026 | 0.388181886 | 0.168275567 |
| ENSGALG00010016027 | 0.987281981 | 0.305552003 |
| ENSGALG00010016028 | 0.907626586 | 0.447893916 |
| ENSGALG00010016030 | 0.952166999 | 0.342219835 |
| ENSGALG00010016031 | 0.284649087 | 0.277893399 |
| ENSGALG00010016038 | 0.025180588 | 0.075082988 |
| ENSGALG00010016039 | 0.296272339 | 0.491563762 |
| ENSGALG00010016040 | 0.894422304 | 0.314041616 |
| ENSGALG00010016041 | 0.721738097 | 0.216975797 |
| ENSGALG00010016042 | 0.409525165 | 0.299962141 |
| ENSGALG00010016043 | 0.759018182 | 0.234401631 |
| ENSGALG00010016044 | 0.175495308 | 0.078870995 |
| ENSGALG00010016045 | 0.46575669  | 0.153341734 |
| ENSGALG00010016046 | 0.476985655 | 0.249084232 |
| ENSGALG00010016047 | 0.965749605 | 0.301889904 |
| ENSGALG00010016048 | 0.833707815 | 0.493375693 |
| ENSGALG00010016049 | 0.975748695 | 0.362186092 |
| ENSGALG00010016051 | 0.535784444 | 0.730539701 |
| ENSGALG00010016052 | 0.235630588 | 0.132393411 |
| ENSGALG00010016053 | 0.602144261 | 0.205081217 |
| ENSGALG00010016057 | 0.286562309 | 0.078822832 |
| ENSGALG00010016058 | 0.383947044 | 0.128562519 |
| ENSGALG00010016059 | 0.989529192 | 0.314522935 |
| ENSGALG00010016062 | 0.902979949 | 0.183430948 |
| ENSGALG00010016065 | 0.135297277 | 0.028198572 |
| ENSGALG00010016066 | 0.936048735 | 0.33064406  |
| ENSGALG00010016067 | 0.994065125 | 0.27499534  |
| ENSGALG00010016068 | 0.504336944 | 0.078426904 |
| ENSGALG00010016069 | 0.92516945  | 0.21683967  |
| ENSGALG00010016071 | 0.549393522 | 0.332801912 |
| ENSGALG00010016073 | 0.420716904 | 0.48115035  |
| ENSGALG00010016075 | 0.371576879 | 0.166670591 |
| ENSGALG00010016076 | 0.066054439 | 0.23146438  |
| ENSGALG00010016077 | 0.249286039 | 0.212819636 |
| ENSGALG00010016079 | 0.54886763  | 0.517632316 |
| ENSGALG00010016082 | 0.756643304 | 0.390030026 |
| ENSGALG00010016083 | 0.286425688 | 0.308748051 |
| ENSGALG00010016086 | 0.126063904 | 0.268218517 |
| ENSGALG00010016087 | 0.539158557 | 0.014841275 |
| ENSGALG00010016088 | 0.200570274 | 0.091667991 |
| ENSGALG00010016089 | 0.382977183 | 0.103780214 |
| ENSGALG00010016090 | 0.562562737 | 0.253096747 |
| ENSGALG00010016093 | 0.739836792 | 0.140121554 |
| ENSGALG00010016094 | 0.92591897  | 0.329097154 |
| ENSGALG00010016097 | 0.935128173 | 0.241193997 |

|                    |             |             |
|--------------------|-------------|-------------|
| ENSGALG00010016098 | 0.962944884 | 0.315769782 |
| ENSGALG00010016099 | 0.390466756 | 0.106163828 |
| ENSGALG00010016100 | 0.349179242 | 0.107617825 |
| ENSGALG00010016103 | 0.97919737  | 0.315171441 |
| ENSGALG00010016107 | 0.524338045 | 0.170935322 |
| ENSGALG00010016109 | 0.323212609 | 0.29722347  |
| ENSGALG00010016111 | 0.833672126 | 0.258618705 |
| ENSGALG00010016112 | 0.09938646  | 0.144176797 |
| ENSGALG00010016113 | 0.774936748 | 0.156271524 |
| ENSGALG00010016114 | 0.758986905 | 0.106619939 |
| ENSGALG00010016115 | 0.31655667  | 0.016549586 |
| ENSGALG00010016117 | 0.660233912 | 0.038202284 |
| ENSGALG00010016118 | 0.947409282 | 0.212390035 |
| ENSGALG00010016119 | 0.993826534 | 0.304842373 |
| ENSGALG00010016121 | 0.987455182 | 0.30081227  |
| ENSGALG00010016122 | 0.616512797 | 0.211900992 |
| ENSGALG00010016123 | 0.832311765 | 0.281287072 |
| ENSGALG00010016124 | 0.248167198 | 0.219554426 |
| ENSGALG00010016125 | 0.078535062 | 0.140437839 |
| ENSGALG00010016126 | 0.827411852 | 0.473072173 |
| ENSGALG00010016127 | 0.824989638 | 0.399259558 |
| ENSGALG00010016128 | 0.689114744 | 0.272345346 |
| ENSGALG00010016129 | 0.573465061 | 0.097256739 |
| ENSGALG00010016131 | 0.953426728 | 0.340629187 |
| ENSGALG00010016132 | 0.270451009 | 0.090541667 |
| ENSGALG00010016133 | 0.865675305 | 0.364023775 |
| ENSGALG00010016136 | 0.186242382 | 0.419579744 |
| ENSGALG00010016137 | 0.938599534 | 0.475767697 |
| ENSGALG00010016138 | 0.80408886  | 0.281467498 |
| ENSGALG00010016139 | 0.058311168 | 0.076408812 |
| ENSGALG00010016140 | 0.749297364 | 0.265235164 |
| ENSGALG00010016141 | 0.679683403 | 0.130018088 |
| ENSGALG00010016142 | 0.185453987 | 0.140651822 |
| ENSGALG00010016144 | 0.285272007 | 0.109169955 |
| ENSGALG00010016147 | 0.99342931  | 0.300825621 |
| ENSGALG00010016150 | 0.793860588 | 0.504528562 |
| ENSGALG00010016151 | 0.385917349 | 0.261153519 |
| ENSGALG00010016154 | 0.485801976 | 0.167509571 |
| ENSGALG00010016155 | 0.516740371 | 0.188296051 |
| ENSGALG00010016158 | 0.392587933 | 0.102850336 |
| ENSGALG00010016159 | 0.985708036 | 0.345880759 |
| ENSGALG00010016160 | 0.387818129 | 0.081671798 |
| ENSGALG00010016163 | 0.813959904 | 0.239315922 |
| ENSGALG00010016164 | 0.796065612 | 0.401815671 |
| ENSGALG00010016165 | 0.67022071  | 0.385731031 |
| ENSGALG00010016166 | 0.877257798 | 0.347434083 |
| ENSGALG00010016167 | 0.269241976 | 0.073173439 |
| ENSGALG00010016168 | 0.908705675 | 0.249021229 |
| ENSGALG00010016169 | 0.060067667 | 0.22427787  |
| ENSGALG00010016173 | 0.19921065  | 0.101741548 |
| ENSGALG00010016176 | 0.220986766 | 0.039126356 |
| ENSGALG00010016177 | 0.995774624 | 0.345564723 |
| ENSGALG00010016181 | 0.935050611 | 0.381619644 |
| ENSGALG00010016182 | 0.851947731 | 0.282948398 |
| ENSGALG00010016188 | 0.69391123  | 0.375947279 |
| ENSGALG00010016190 | 0.913013088 | 0.324517425 |



|                    |             |             |
|--------------------|-------------|-------------|
| ENSGALG00010016193 | 0.929377859 | 0.455743393 |
| ENSGALG00010016197 | 0.765078395 | 0.233015864 |
| ENSGALG00010016199 | 0.085081312 | 0.245008948 |
| ENSGALG00010016200 | 0.309444066 | 0.156651418 |
| ENSGALG00010016204 | 0.927613457 | 0.220236117 |
| ENSGALG00010016205 | 0.732103343 | 0.608646457 |
| ENSGALG00010016206 | 0.988484873 | 0.387836869 |
| ENSGALG00010016207 | 0.676465569 | 0.249633426 |
| ENSGALG00010016208 | 0.395556858 | 0.102965232 |
| ENSGALG00010016209 | 0.742260876 | 0.226775094 |
| ENSGALG00010016210 | 0.219386918 | 0.079388121 |
| ENSGALG00010016211 | 0.828271986 | 0.1864031   |
| ENSGALG00010016212 | 0.294869419 | 0.092251697 |
| ENSGALG00010016214 | 0.011730111 | 0.196288363 |
| ENSGALG00010016215 | 0.170955113 | 0.137699973 |
| ENSGALG00010016218 | 0.764327193 | 0.06306163  |
| ENSGALG00010016221 | 0.801743528 | 0.247720686 |
| ENSGALG00010016224 | 0.863356925 | 0.244150624 |
| ENSGALG00010016225 | 0.773538286 | 0.173910132 |
| ENSGALG00010016227 | 0.733425053 | 0.213079039 |
| ENSGALG00010016229 | 0.996247266 | 0.347295786 |
| ENSGALG00010016231 | 0.898065918 | 0.305050482 |
| ENSGALG00010016232 | 0.273203553 | 0.22470318  |
| ENSGALG00010016235 | 0.466631312 | 0.050994032 |
| ENSGALG00010016236 | 0.799469086 | 0.19318674  |
| ENSGALG00010016240 | 0.938673659 | 0.143796617 |
| ENSGALG00010016241 | 0.956294086 | 0.353147549 |
| ENSGALG00010016242 | 0.878846264 | 0.163029352 |
| ENSGALG00010016243 | 0.168323018 | 0.058419001 |
| ENSGALG00010016245 | 0.945642605 | 0.237947464 |
| ENSGALG00010016247 | 0.713988731 | 0.34842621  |
| ENSGALG00010016248 | 0.483659028 | 0.368376674 |
| ENSGALG00010016249 | 0.97301695  | 0.292163784 |
| ENSGALG00010016251 | 0.8455816   | 0.125913634 |
| ENSGALG00010016253 | 0.526867884 | 0.100558144 |
| ENSGALG00010016255 | 0.913529064 | 0.345890534 |
| ENSGALG00010016257 | 0.817555658 | 0.384868282 |
| ENSGALG00010016258 | 0.959844839 | 0.267111325 |
| ENSGALG00010016260 | 0.525466999 | 0.392861981 |
| ENSGALG00010016262 | 0.538175519 | 0.125502819 |
| ENSGALG00010016263 | 0.996595544 | 0.307776116 |
| ENSGALG00010016266 | 0.931490622 | 0.422957705 |
| ENSGALG00010016270 | 0.521605846 | 0.501890082 |
| ENSGALG00010016273 | 0.548737434 | 0.159124595 |
| ENSGALG00010016274 | 0.874905482 | 0.025120849 |
| ENSGALG00010016275 | 0.014136607 | 0.064713326 |
| ENSGALG00010016276 | 0.93407827  | 0.330681508 |
| ENSGALG00010016277 | 0.450029279 | 0.406839901 |
| ENSGALG00010016279 | 0.77682189  | 0.18333656  |
| ENSGALG00010016280 | 0.140487315 | 0.226137306 |
| ENSGALG00010016281 | 0.981622152 | 0.376819288 |
| ENSGALG00010016284 | 0.04285744  | 0.659429294 |
| ENSGALG00010016286 | 0.469148654 | 0.455725825 |
| ENSGALG00010016287 | 0.922655465 | 0.402584868 |
| ENSGALG00010016288 | 0.488583769 | 0.130802663 |
| ENSGALG00010016289 | 0.946117958 | 0.309092661 |

|                    |             |             |
|--------------------|-------------|-------------|
| ENSGALG00010016291 | 0.360497503 | 0.054970648 |
| ENSGALG00010016292 | 0.99839086  | 0.338324894 |
| ENSGALG00010016295 | 0.919113601 | 0.293478409 |
| ENSGALG00010016297 | 0.560462923 | 0.162133252 |
| ENSGALG00010016298 | 0.204552216 | 0.204121451 |
| ENSGALG00010016299 | 0.863676354 | 0.346727197 |
| ENSGALG00010016301 | 0.688066446 | 0.549758404 |
| ENSGALG00010016302 | 0.516804126 | 0.16545839  |
| ENSGALG00010016303 | 0.894934996 | 0.309324279 |
| ENSGALG00010016304 | 0.990270361 | 0.311473686 |
| ENSGALG00010016305 | 0.971171265 | 0.430944186 |
| ENSGALG00010016306 | 0.964153135 | 0.286008379 |
| ENSGALG00010016307 | 0.965150522 | 0.293416641 |
| ENSGALG00010016308 | 0.593629743 | 0.244773828 |
| ENSGALG00010016309 | 0.365401829 | 0.098829438 |
| ENSGALG00010016310 | 0.954916147 | 0.40800133  |
| ENSGALG00010016312 | 0.564461379 | 0.041067284 |
| ENSGALG00010016314 | 0.758057184 | 0.399201016 |
| ENSGALG00010016315 | 0.763356188 | 0.314953207 |
| ENSGALG00010016316 | 0.571240054 | 0.18833381  |
| ENSGALG00010016317 | 0.872202344 | 0.122982996 |
| ENSGALG00010016319 | 0.88720095  | 0.275994982 |
| ENSGALG00010016320 | 0.146098381 | 0.192474529 |
| ENSGALG00010016322 | 0.949066362 | 0.298811973 |
| ENSGALG00010016324 | 0.045074849 | 0.138626677 |
| ENSGALG00010016325 | 0.761836426 | 0.226591284 |
| ENSGALG00010016326 | 0.435281146 | 0.220330623 |
| ENSGALG00010016327 | 0.208550923 | 0.676301294 |
| ENSGALG00010016328 | 0.983707791 | 0.337278192 |
| ENSGALG00010016330 | 0.193293814 | 0.024632447 |
| ENSGALG00010016331 | 0.731703313 | 0.268139745 |
| ENSGALG00010016332 | 0.094833829 | 0.005003323 |
| ENSGALG00010016333 | 0.659030536 | 0.228077943 |
| ENSGALG00010016334 | 0.812851675 | 0.287846728 |
| ENSGALG00010016335 | 0.907098817 | 0.277330185 |
| ENSGALG00010016336 | 0.681223765 | 0.336412272 |
| ENSGALG00010016337 | 0.879121572 | 0.324144617 |
| ENSGALG00010016338 | 0.945081986 | 0.122465041 |
| ENSGALG00010016339 | 0.956375093 | 0.274485377 |
| ENSGALG00010016340 | 0.933213122 | 0.41423777  |
| ENSGALG00010016341 | 0.884948878 | 0.262786137 |
| ENSGALG00010016342 | 0.87747416  | 0.329387921 |
| ENSGALG00010016344 | 0.966378172 | 0.283963228 |
| ENSGALG00010016345 | 0.926085236 | 0.323286864 |
| ENSGALG00010016346 | 0.846751255 | 0.289975882 |
| ENSGALG00010016347 | 0.944982563 | 0.360403702 |
| ENSGALG00010016349 | 0.264239718 | 0.073427965 |
| ENSGALG00010016350 | 0.226856701 | 0.276372299 |
| ENSGALG00010016351 | 0.606414747 | 0.410267991 |
| ENSGALG00010016352 | 0.877897249 | 0.326273224 |
| ENSGALG00010016353 | 0.216690666 | 0.254935735 |
| ENSGALG00010016355 | 0.527195777 | 0.039333227 |
| ENSGALG00010016357 | 0.467275937 | 0.311472226 |
| ENSGALG00010016359 | 0.20887102  | 0.308792689 |
| ENSGALG00010016361 | 0.720241619 | 0.195852243 |
| ENSGALG00010016362 | 0.873639959 | 0.340936668 |

|                    |             |             |
|--------------------|-------------|-------------|
| ENSGALG00010016363 | 0.540443997 | 0.281586923 |
| ENSGALG00010016365 | 0.099028626 | 0.079591415 |
| ENSGALG00010016366 | 0.068483667 | 0.200974959 |
| ENSGALG00010016367 | 0.285272007 | 0.109169955 |
| ENSGALG00010016368 | 0.758290251 | 0.048662516 |
| ENSGALG00010016369 | 0.49667724  | 0.129274834 |
| ENSGALG00010016370 | 0.969800882 | 0.344899493 |
| ENSGALG00010016372 | 0.906244171 | 0.270662569 |
| ENSGALG00010016373 | 0.992537878 | 0.341533625 |
| ENSGALG00010016374 | 0.988012719 | 0.308581907 |
| ENSGALG00010016375 | 0.931744521 | 0.402650935 |
| ENSGALG00010016376 | 0.803512967 | 0.278209456 |
| ENSGALG00010016377 | 0.935532184 | 0.346567772 |
| ENSGALG00010016378 | 0.921733994 | 0.230796713 |
| ENSGALG00010016379 | 0.468375439 | 0.245945711 |
| ENSGALG00010016380 | 0.665671155 | 0.036674639 |
| ENSGALG00010016382 | 0.983552374 | 0.328938189 |
| ENSGALG00010016383 | 0.483179301 | 0.241270085 |
| ENSGALG00010016384 | 0.534273356 | 0.070255614 |
| ENSGALG00010016385 | 0.956888266 | 0.392319116 |
| ENSGALG00010016386 | 0.767428465 | 0.319048214 |
| ENSGALG00010016387 | 0.944094979 | 0.37318035  |
| ENSGALG00010016390 | 0.682325725 | 0.064250629 |
| ENSGALG00010016392 | 0.030219813 | 0.063120102 |
| ENSGALG00010016393 | 0.751629557 | 0.374970015 |
| ENSGALG00010016394 | 0.926494179 | 0.309677717 |
| ENSGALG00010016395 | 0.832771453 | 0.259524669 |
| ENSGALG00010016397 | 0.845177809 | 0.204294219 |
| ENSGALG00010016398 | 0.733820073 | 0.415259534 |
| ENSGALG00010016399 | 0.94033757  | 0.430004942 |
| ENSGALG00010016400 | 0.996331474 | 0.316450302 |
| ENSGALG00010016402 | 0.956576879 | 0.292344008 |
| ENSGALG00010016403 | 0.918542115 | 0.323408046 |
| ENSGALG00010016404 | 0.940547038 | 0.400056506 |
| ENSGALG00010016406 | 0.917545795 | 0.321131368 |
| ENSGALG00010016407 | 0.756209149 | 0.354575436 |
| ENSGALG00010016409 | 0.933188591 | 0.314622269 |
| ENSGALG00010016410 | 0.92616268  | 0.304899598 |
| ENSGALG00010016411 | 0.904558374 | 0.22975824  |
| ENSGALG00010016412 | 0.975658205 | 0.328895926 |
| ENSGALG00010016413 | 0.442172085 | 0.226056926 |
| ENSGALG00010016414 | 0.979377314 | 0.292955789 |
| ENSGALG00010016415 | 0.400164632 | 0.160024928 |
| ENSGALG00010016416 | 0.904654296 | 0.161745178 |
| ENSGALG00010016417 | 0.532864725 | 0.196644624 |
| ENSGALG00010016418 | 0.422524278 | 0.153442406 |
| ENSGALG00010016421 | 0.301753662 | 0.0251386   |
| ENSGALG00010016422 | 0.992500165 | 0.350196999 |
| ENSGALG00010016423 | 0.192751706 | 0.225726704 |
| ENSGALG00010016424 | 0.331267319 | 0.379636003 |
| ENSGALG00010016425 | 0.984853459 | 0.296475239 |
| ENSGALG00010016426 | 0.952825288 | 0.326033047 |
| ENSGALG00010016428 | 0.297013702 | 0.006120238 |
| ENSGALG00010016429 | 0.434892598 | 0.262376375 |
| ENSGALG00010016431 | 0.376156992 | 0.044713964 |
| ENSGALG00010016432 | 0.495911024 | 0.154704313 |

|                    |             |             |
|--------------------|-------------|-------------|
| ENSGALG00010016433 | 0.838499816 | 0.197710326 |
| ENSGALG00010016434 | 0.380838651 | 0.159033541 |
| ENSGALG00010016436 | 0.719813134 | 0.061866246 |
| ENSGALG00010016437 | 0.90734651  | 0.331053893 |
| ENSGALG00010016438 | 0.500645134 | 0.208879733 |
| ENSGALG00010016440 | 0.381352663 | 0.078374659 |
| ENSGALG00010016441 | 0.12830585  | 0.232254388 |
| ENSGALG00010016444 | 0.48775796  | 0.189318879 |
| ENSGALG00010016445 | 0.862800815 | 0.366439285 |
| ENSGALG00010016447 | 0.95703057  | 0.301141875 |
| ENSGALG00010016449 | 0.718884236 | 0.326248122 |
| ENSGALG00010016450 | 0.318640984 | 0.296289522 |
| ENSGALG00010016451 | 0.945268922 | 0.225526116 |
| ENSGALG00010016452 | 0.591692612 | 0.077419841 |
| ENSGALG00010016453 | 0.911778563 | 0.228871181 |
| ENSGALG00010016454 | 0.923577977 | 0.335534742 |
| ENSGALG00010016455 | 0.777226027 | 0.092274481 |
| ENSGALG00010016456 | 0.917110714 | 0.362571912 |
| ENSGALG00010016457 | 0.765451421 | 0.15842002  |
| ENSGALG00010016458 | 0.857304442 | 0.202504935 |
| ENSGALG00010016459 | 0.6612653   | 0.165259428 |
| ENSGALG00010016460 | 0.979176088 | 0.325910833 |
| ENSGALG00010016461 | 0.753743318 | 0.456758783 |
| ENSGALG00010016462 | 0.530825215 | 0.061122277 |
| ENSGALG00010016463 | 0.453378702 | 0.252065869 |
| ENSGALG00010016464 | 0.085893651 | 0.227642825 |
| ENSGALG00010016465 | 0.444161307 | 0.362728448 |
| ENSGALG00010016466 | 0.892115836 | 0.323188968 |
| ENSGALG00010016468 | 0.965827575 | 0.243111349 |
| ENSGALG00010016469 | 0.4385448   | 0.153973416 |
| ENSGALG00010016470 | 0.029454428 | 0.045015667 |
| ENSGALG00010016471 | 0.988008495 | 0.37299672  |
| ENSGALG00010016472 | 0.386042959 | 0.251457033 |
| ENSGALG00010016473 | 0.345905068 | 0.137054118 |
| ENSGALG00010016474 | 0.424932398 | 0.216580534 |
| ENSGALG00010016475 | 0.776865605 | 0.126455788 |
| ENSGALG00010016476 | 0.08796732  | 0.167832124 |
| ENSGALG00010016477 | 0.515522889 | 0.18220432  |
| ENSGALG00010016479 | 0.570491898 | 0.245923558 |
| ENSGALG00010016480 | 0.454712994 | 0.241250554 |
| ENSGALG00010016482 | 0.985744687 | 0.318260979 |
| ENSGALG00010016483 | 0.771403022 | 0.313789003 |
| ENSGALG00010016485 | 0.486398155 | 0.197317856 |
| ENSGALG00010016486 | 0.42204462  | 0.074337987 |
| ENSGALG00010016487 | 0.54083973  | 0.020071667 |
| ENSGALG00010016489 | 0.308949431 | 0.165913182 |
| ENSGALG00010016490 | 0.198445645 | 0.09434737  |
| ENSGALG00010016491 | 0.811581336 | 0.249513709 |
| ENSGALG00010016492 | 0.497995268 | 0.219620827 |
| ENSGALG00010016493 | 0.156127797 | 0.48196368  |
| ENSGALG00010016494 | 0.701096922 | 0.208645755 |
| ENSGALG00010016496 | 0.892971968 | 0.413297338 |
| ENSGALG00010016497 | 0.41088235  | 0.529716891 |
| ENSGALG00010016498 | 0.615944922 | 0.107553777 |
| ENSGALG00010016499 | 0.204625936 | 0.347920376 |
| ENSGALG00010016500 | 0.968251199 | 0.300478386 |

|                    |             |             |
|--------------------|-------------|-------------|
| ENSGALG00010016501 | 0.18434576  | 0.199610304 |
| ENSGALG00010016502 | 0.975582419 | 0.313129644 |
| ENSGALG00010016503 | 0.300059767 | 0.357958306 |
| ENSGALG00010016504 | 0.773253986 | 0.268842096 |
| ENSGALG00010016505 | 0.034807712 | 0.02685467  |
| ENSGALG00010016506 | 0.587681599 | 0.293270196 |
| ENSGALG00010016507 | 0.742429589 | 0.227597598 |
| ENSGALG00010016508 | 0.75642296  | 0.097657671 |
| ENSGALG00010016509 | 0.659608416 | 0.021347957 |
| ENSGALG00010016510 | 0.194772588 | 0.214413605 |
| ENSGALG00010016511 | 0.754160984 | 0.023464616 |
| ENSGALG00010016512 | 0.438852492 | 0.143468944 |
| ENSGALG00010016513 | 0.050115024 | 0.155140157 |
| ENSGALG00010016514 | 0.568888056 | 0.50615468  |
| ENSGALG00010016517 | 0.316133857 | 0.530068019 |
| ENSGALG00010016518 | 0.520808633 | 0.326810167 |
| ENSGALG00010016519 | 0.894982107 | 0.353133217 |
| ENSGALG00010016520 | 0.104015521 | 0.29833598  |
| ENSGALG00010016521 | 0.804909383 | 0.287464548 |
| ENSGALG00010016522 | 0.687836685 | 0.184195047 |
| ENSGALG00010016523 | 0.36451069  | 0.333737215 |
| ENSGALG00010016526 | 0.963925992 | 0.277969428 |
| ENSGALG00010016527 | 0.673480714 | 0.220125385 |
| ENSGALG00010016529 | 0.404862142 | 0.155183269 |
| ENSGALG00010016531 | 0.94691447  | 0.307357683 |
| ENSGALG00010016532 | 0.933161401 | 0.330191379 |
| ENSGALG00010016533 | 0.761176864 | 0.088460662 |
| ENSGALG00010016534 | 0.669126764 | 0.06137904  |
| ENSGALG00010016535 | 0.664119606 | 0.387161952 |
| ENSGALG00010016538 | 0.666969823 | 0.351340513 |
| ENSGALG00010016539 | 0.216433634 | 0.680598293 |
| ENSGALG00010016541 | 0.193702696 | 0.019758057 |
| ENSGALG00010016542 | 0.445136375 | 0.008031032 |
| ENSGALG00010016543 | 0.91397227  | 0.245501278 |
| ENSGALG00010016544 | 0.991678416 | 0.298114494 |
| ENSGALG00010016545 | 0.376085884 | 0.180749605 |
| ENSGALG00010016546 | 0.705097455 | 0.288132886 |
| ENSGALG00010016547 | 0.985098013 | 0.338582461 |
| ENSGALG00010016548 | 0.56214221  | 0.258370802 |
| ENSGALG00010016549 | 0.710456665 | 0.060116041 |
| ENSGALG00010016550 | 0.250632286 | 0.235575858 |
| ENSGALG00010016551 | 0.881264796 | 0.27532896  |
| ENSGALG00010016552 | 0.694576094 | 0.033272137 |
| ENSGALG00010016553 | 0.885120581 | 0.377270302 |
| ENSGALG00010016556 | 0.53141527  | 0.221578146 |
| ENSGALG00010016557 | 0.300090076 | 0.087382432 |
| ENSGALG00010016558 | 0.953344734 | 0.336245878 |
| ENSGALG00010016559 | 0.058635451 | 0.160532315 |
| ENSGALG00010016560 | 0.309016749 | 0.315540562 |
| ENSGALG00010016561 | 0.877073002 | 0.293106548 |
| ENSGALG00010016562 | 0.715953429 | 0.204952655 |
| ENSGALG00010016563 | 0.461467044 | 0.356250549 |
| ENSGALG00010016564 | 0.812139722 | 0.10755887  |
| ENSGALG00010016565 | 0.310725139 | 0.099441788 |
| ENSGALG00010016566 | 0.736745201 | 0.141127406 |
| ENSGALG00010016567 | 0.560456957 | 0.453324587 |

|                    |             |             |
|--------------------|-------------|-------------|
| ENSGALG00010016568 | 0.882482381 | 0.337282563 |
| ENSGALG00010016569 | 0.804747196 | 0.165804373 |
| ENSGALG00010016570 | 0.83386181  | 0.249792199 |
| ENSGALG00010016571 | 0.936726345 | 0.310842321 |
| ENSGALG00010016572 | 0.301926858 | 0.122797728 |
| ENSGALG00010016573 | 0.919320135 | 0.184463928 |
| ENSGALG00010016574 | 0.885581262 | 0.273577655 |
| ENSGALG00010016575 | 0.67460584  | 0.031313618 |
| ENSGALG00010016576 | 0.953530221 | 0.370217866 |
| ENSGALG00010016577 | 0.930855197 | 0.378762141 |
| ENSGALG00010016580 | 0.750871772 | 0.313470343 |
| ENSGALG00010016581 | 0.916539266 | 0.301818383 |
| ENSGALG00010016582 | 0.61940917  | 0.459696796 |
| ENSGALG00010016583 | 0.811843632 | 0.27103607  |
| ENSGALG00010016584 | 0.049369938 | 0.02962301  |
| ENSGALG00010016585 | 0.327395037 | 0.23559956  |
| ENSGALG00010016587 | 0.435557604 | 0.225613862 |
| ENSGALG00010016588 | 0.750038545 | 0.393414246 |
| ENSGALG00010016589 | 0.756364287 | 0.306563381 |
| ENSGALG00010016591 | 0.888157647 | 0.26923305  |
| ENSGALG00010016592 | 0.958426023 | 0.245558253 |
| ENSGALG00010016594 | 0.28293882  | 0.145057094 |
| ENSGALG00010016595 | 0.843276313 | 0.197197274 |
| ENSGALG00010016596 | 0.700178844 | 0.406463411 |
| ENSGALG00010016597 | 0.918305647 | 0.293168533 |
| ENSGALG00010016598 | 0.556902314 | 0.021716284 |
| ENSGALG00010016599 | 0.968928938 | 0.424319134 |
| ENSGALG00010016600 | 0.30046948  | 0.15279235  |
| ENSGALG00010016601 | 0.608695829 | 0.073457235 |
| ENSGALG00010016602 | 0.904927368 | 0.248839307 |
| ENSGALG00010016603 | 0.939570344 | 0.294134824 |
| ENSGALG00010016604 | 0.882501913 | 0.22590417  |
| ENSGALG00010016605 | 0.688577888 | 0.276892575 |
| ENSGALG00010016606 | 0.350108996 | 0.183548795 |
| ENSGALG00010016607 | 0.432193539 | 0.022113042 |
| ENSGALG00010016608 | 0.467211485 | 0.039034571 |
| ENSGALG00010016610 | 0.318072251 | 0.131989285 |
| ENSGALG00010016611 | 0.01407268  | 0.098936353 |
| ENSGALG00010016612 | 0.64970217  | 0.003559266 |
| ENSGALG00010016613 | 0.491922195 | 0.024012954 |
| ENSGALG00010016614 | 0.903049504 | 0.315258163 |
| ENSGALG00010016615 | 0.468012111 | 0.073424383 |
| ENSGALG00010016616 | 0.851567204 | 0.360451014 |
| ENSGALG00010016617 | 0.028008735 | 0.138260234 |
| ENSGALG00010016618 | 0.821000809 | 0.223074681 |
| ENSGALG00010016619 | 0.966698766 | 0.325031066 |
| ENSGALG00010016620 | 0.03159394  | 0.023468385 |
| ENSGALG00010016621 | 0.378132611 | 0.75278282  |
| ENSGALG00010016622 | 0.391106478 | 0.144472949 |
| ENSGALG00010016623 | 0.945787492 | 0.240967037 |
| ENSGALG00010016624 | 0.344448068 | 0.062309616 |
| ENSGALG00010016625 | 0.011918622 | 0.249719435 |
| ENSGALG00010016626 | 0.556759714 | 0.463423328 |
| ENSGALG00010016627 | 0.485455767 | 0.729266223 |
| ENSGALG00010016628 | 0.301772951 | 0.966506966 |
| ENSGALG00010016629 | 0.701057901 | 0.253429413 |

|                    |             |             |
|--------------------|-------------|-------------|
| ENSGALG00010016630 | 0.726294725 | 0.14019815  |
| ENSGALG00010016631 | 0.967789148 | 0.326024047 |
| ENSGALG00010016634 | 0.491151149 | 0.232069802 |
| ENSGALG00010016636 | 0.629005897 | 0.057699845 |
| ENSGALG00010016637 | 0.402384438 | 0.115161426 |
| ENSGALG00010016638 | 0.790221493 | 0.283737521 |
| ENSGALG00010016639 | 0.749750882 | 0.249939547 |
| ENSGALG00010016640 | 0.705810092 | 0.468188252 |
| ENSGALG00010016641 | 0.242697762 | 0.046307277 |
| ENSGALG00010016643 | 0.990327268 | 0.314616729 |
| ENSGALG00010016644 | 0.945507095 | 0.274466124 |
| ENSGALG00010016645 | 0.200570274 | 0.091667991 |
| ENSGALG00010016646 | 0.385953062 | 0.133261917 |
| ENSGALG00010016647 | 0.466033185 | 0.003228921 |
| ENSGALG00010016648 | 0.825346991 | 0.312829897 |
| ENSGALG00010016651 | 0.945522787 | 0.260912958 |
| ENSGALG00010016652 | 0.993435734 | 0.316704328 |
| ENSGALG00010016653 | 0.309178419 | 0.206984408 |
| ENSGALG00010016654 | 0.51666812  | 0.190115639 |
| ENSGALG00010016655 | 0.943124751 | 0.325792946 |
| ENSGALG00010016657 | 0.950106302 | 0.313762608 |
| ENSGALG00010016658 | 0.487905955 | 0.038988181 |
| ENSGALG00010016659 | 0.134070044 | 0.223921099 |
| ENSGALG00010016661 | 0.709855411 | 0.333598734 |
| ENSGALG00010016663 | 0.867910052 | 0.049783568 |
| ENSGALG00010016664 | 0.585721903 | 0.36100014  |
| ENSGALG00010016665 | 0.973568724 | 0.283866846 |
| ENSGALG00010016666 | 0.635933338 | 0.029686833 |
| ENSGALG00010016667 | 0.099441885 | 0.153915144 |
| ENSGALG00010016670 | 0.900679879 | 0.393640299 |
| ENSGALG00010016671 | 0.299518609 | 0.069647191 |
| ENSGALG00010016672 | 0.973048558 | 0.37554206  |
| ENSGALG00010016673 | 0.958967256 | 0.18939979  |
| ENSGALG00010016674 | 0.697148467 | 0.049520887 |
| ENSGALG00010016675 | 0.917938164 | 0.269637059 |
| ENSGALG00010016676 | 0.949414213 | 0.335981051 |
| ENSGALG00010016677 | 0.815839008 | 0.140603521 |
| ENSGALG00010016678 | 0.896833507 | 0.268866405 |
| ENSGALG00010016679 | 0.49906172  | 0.179357039 |
| ENSGALG00010016680 | 0.264239718 | 0.073427965 |
| ENSGALG00010016681 | 0.839005403 | 0.282282276 |
| ENSGALG00010016682 | 0.982477654 | 0.373579728 |
| ENSGALG00010016683 | 0.575703183 | 0.069100181 |
| ENSGALG00010016684 | 0.396108191 | 0.15301941  |
| ENSGALG00010016686 | 0.205170479 | 0.096085038 |
| ENSGALG00010016687 | 0.256828349 | 0.119064955 |
| ENSGALG00010016688 | 0.872200858 | 0.348506558 |
| ENSGALG00010016690 | 0.26826433  | 0.16644847  |
| ENSGALG00010016691 | 0.384262585 | 0.091757058 |
| ENSGALG00010016692 | 0.842292962 | 0.412463321 |
| ENSGALG00010016694 | 0.043659357 | 0.108092216 |
| ENSGALG00010016695 | 0.678893091 | 0.353375183 |
| ENSGALG00010016696 | 0.981683481 | 0.291579971 |
| ENSGALG00010016699 | 0.997055028 | 0.342515793 |
| ENSGALG00010016700 | 0.047704397 | 0.244258012 |
| ENSGALG00010016701 | 0.573126974 | 0.001411343 |

|                    |             |             |
|--------------------|-------------|-------------|
| ENSGALG00010016702 | 0.514000577 | 0.061815838 |
| ENSGALG00010016703 | 0.366395198 | 0.115102176 |
| ENSGALG00010016704 | 0.392868622 | 0.196336235 |
| ENSGALG00010016706 | 0.982205006 | 0.350468932 |
| ENSGALG00010016707 | 0.983473132 | 0.295110017 |
| ENSGALG00010016708 | 0.573474405 | 0.293507608 |
| ENSGALG00010016709 | 0.414402319 | 0.043916107 |
| ENSGALG00010016710 | 0.296648799 | 0.034280929 |
| ENSGALG00010016711 | 0.409911588 | 0.349233755 |
| ENSGALG00010016712 | 0.925265163 | 0.306592916 |
| ENSGALG00010016713 | 0.926930366 | 0.140404895 |
| ENSGALG00010016714 | 0.317727434 | 0.146443343 |
| ENSGALG00010016715 | 0.671772924 | 0.245611548 |
| ENSGALG00010016717 | 0.669391596 | 0.294152317 |
| ENSGALG00010016718 | 0.391919077 | 0.131677909 |
| ENSGALG00010016719 | 0.310438704 | 0.069044687 |
| ENSGALG00010016720 | 0.718833003 | 0.497949515 |
| ENSGALG00010016722 | 0.710763355 | 0.326537428 |
| ENSGALG00010016724 | 0.949321755 | 0.23239435  |
| ENSGALG00010016729 | 0.679971718 | 0.247187241 |
| ENSGALG00010016730 | 0.902010039 | 0.306129355 |
| ENSGALG00010016731 | 0.878383862 | 0.117979299 |
| ENSGALG00010016732 | 0.129757092 | 0.312745481 |
| ENSGALG00010016733 | 0.393157339 | 0.241151433 |
| ENSGALG00010016734 | 0.142087934 | 0.18257098  |
| ENSGALG00010016735 | 0.744336755 | 0.37851223  |
| ENSGALG00010016736 | 0.508679709 | 0.032621771 |
| ENSGALG00010016738 | 0.958238126 | 0.304941313 |
| ENSGALG00010016739 | 0.518638572 | 0.273046581 |
| ENSGALG00010016741 | 0.800306187 | 0.250435394 |
| ENSGALG00010016742 | 0.383642761 | 0.158269652 |
| ENSGALG00010016743 | 0.14997172  | 0.177400817 |
| ENSGALG00010016744 | 0.507817099 | 0.166841031 |
| ENSGALG00010016745 | 0.984360867 | 0.275678078 |
| ENSGALG00010016746 | 0.080864191 | 0.503836742 |
| ENSGALG00010016747 | 0.299979544 | 0.223068876 |
| ENSGALG00010016748 | 0.153327401 | 0.262227393 |
| ENSGALG00010016750 | 0.741152762 | 0.344279312 |
| ENSGALG00010016751 | 0.269500008 | 0.205458342 |
| ENSGALG00010016752 | 0.895256182 | 0.307452145 |
| ENSGALG00010016753 | 0.866904182 | 0.224485041 |
| ENSGALG00010016754 | 0.872249898 | 0.105374166 |
| ENSGALG00010016756 | 0.994383023 | 0.346969213 |
| ENSGALG00010016757 | 0.863261458 | 0.356445633 |
| ENSGALG00010016758 | 0.631885073 | 0.361615615 |
| ENSGALG00010016760 | 0.97215907  | 0.249598504 |
| ENSGALG00010016761 | 0.943723549 | 0.307223018 |
| ENSGALG00010016762 | 0.880918027 | 0.453625587 |
| ENSGALG00010016763 | 0.971049076 | 0.363930915 |
| ENSGALG00010016765 | 0.060830804 | 0.115976931 |
| ENSGALG00010016766 | 0.977719727 | 0.251226335 |
| ENSGALG00010016767 | 0.990498087 | 0.300515256 |
| ENSGALG00010016768 | 0.724835659 | 0.449339628 |
| ENSGALG00010016769 | 0.204125996 | 0.170747153 |
| ENSGALG00010016770 | 0.372520634 | 0.173408192 |
| ENSGALG00010016771 | 0.575267436 | 0.072504719 |



|                    |             |             |
|--------------------|-------------|-------------|
| ENSGALG00010016772 | 0.429724711 | 0.003125211 |
| ENSGALG00010016773 | 0.919158932 | 0.31542703  |
| ENSGALG00010016774 | 0.845306592 | 0.150551371 |
| ENSGALG00010016776 | 0.25368922  | 0.213271183 |
| ENSGALG00010016777 | 0.711792285 | 0.317755922 |
| ENSGALG00010016778 | 0.90073249  | 0.19841052  |
| ENSGALG00010016779 | 0.931392834 | 0.264495815 |
| ENSGALG00010016780 | 0.069598168 | 0.039760573 |
| ENSGALG00010016781 | 0.997219035 | 0.345963924 |
| ENSGALG00010016782 | 0.547597802 | 0.097172401 |
| ENSGALG00010016783 | 0.098489538 | 0.318453401 |
| ENSGALG00010016784 | 0.837342833 | 0.231850237 |
| ENSGALG00010016785 | 0.539165004 | 0.342717647 |
| ENSGALG00010016786 | 0.794118343 | 0.123712563 |
| ENSGALG00010016787 | 0.9622098   | 0.28235594  |
| ENSGALG00010016788 | 0.47124279  | 0.000788952 |
| ENSGALG00010016789 | 0.945268366 | 0.215620406 |
| ENSGALG00010016792 | 0.935678755 | 0.299848485 |
| ENSGALG00010016793 | 0.984666096 | 0.310133321 |
| ENSGALG00010016795 | 0.963508682 | 0.334824344 |
| ENSGALG00010016796 | 0.879139646 | 0.314506946 |
| ENSGALG00010016797 | 0.976982633 | 0.384998471 |
| ENSGALG00010016798 | 0.840200328 | 0.318078468 |
| ENSGALG00010016799 | 0.965255776 | 0.237143281 |
| ENSGALG00010016800 | 0.150337883 | 0.101391765 |
| ENSGALG00010016801 | 0.969940114 | 0.323593474 |
| ENSGALG00010016802 | 0.871687701 | 0.170289206 |
| ENSGALG00010016803 | 0.628639671 | 0.089767857 |
| ENSGALG00010016804 | 0.977177885 | 0.320919621 |
| ENSGALG00010016805 | 0.325621802 | 0.13143486  |
| ENSGALG00010016806 | 0.508940138 | 0.050703399 |
| ENSGALG00010016807 | 0.993233173 | 0.317981347 |
| ENSGALG00010016808 | 0.243003602 | 0.209494585 |
| ENSGALG00010016809 | 0.740411785 | 0.56739181  |
| ENSGALG00010016810 | 0.804187226 | 0.404845945 |
| ENSGALG00010016812 | 0.750956071 | 0.39463898  |
| ENSGALG00010016813 | 0.922319226 | 0.297237029 |
| ENSGALG00010016814 | 0.040465578 | 0.015829063 |
| ENSGALG00010016815 | 0.127220573 | 0.433349718 |
| ENSGALG00010016816 | 0.628939454 | 0.275635417 |
| ENSGALG00010016817 | 0.866532272 | 0.171472643 |
| ENSGALG00010016818 | 0.691809599 | 0.116664272 |
| ENSGALG00010016820 | 0.989174562 | 0.281924388 |
| ENSGALG00010016821 | 0.10375347  | 0.066576005 |
| ENSGALG00010016823 | 0.307357231 | 0.20020637  |
| ENSGALG00010016825 | 0.987623827 | 0.332398239 |
| ENSGALG00010016828 | 0.986755525 | 0.382069997 |
| ENSGALG00010016831 | 0.865367626 | 0.325740472 |
| ENSGALG00010016832 | 0.552375923 | 0.081141804 |
| ENSGALG00010016834 | 0.868958795 | 0.175528044 |
| ENSGALG00010016835 | 0.813808459 | 0.290208924 |
| ENSGALG00010016836 | 0.80435934  | 0.437253665 |
| ENSGALG00010016838 | 0.922410817 | 0.327356125 |
| ENSGALG00010016840 | 0.939811126 | 0.297735516 |
| ENSGALG00010016841 | 0.011589493 | 0.110944875 |
| ENSGALG00010016842 | 0.260523852 | 0.32016603  |

|                    |             |             |
|--------------------|-------------|-------------|
| ENSGALG00010016843 | 0.739812253 | 0.392050831 |
| ENSGALG00010016845 | 0.963496666 | 0.300631823 |
| ENSGALG00010016847 | 0.938178874 | 0.20429919  |
| ENSGALG00010016848 | 0.11586867  | 0.103637016 |
| ENSGALG00010016849 | 0.926772028 | 0.341631176 |
| ENSGALG00010016850 | 0.519843462 | 0.314613684 |
| ENSGALG00010016851 | 0.366271267 | 0.111713436 |
| ENSGALG00010016852 | 0.963986542 | 0.315072204 |
| ENSGALG00010016853 | 0.508772524 | 0.248804662 |
| ENSGALG00010016854 | 0.15695072  | 0.002337982 |
| ENSGALG00010016855 | 0.775301723 | 0.277813169 |
| ENSGALG00010016856 | 0.957965463 | 0.28002331  |
| ENSGALG00010016858 | 0.583544465 | 0.3984062   |
| ENSGALG00010016859 | 0.301366939 | 0.546014643 |
| ENSGALG00010016860 | 0.408149558 | 0.262548722 |
| ENSGALG00010016861 | 0.541748048 | 0.082162559 |
| ENSGALG00010016862 | 0.821433198 | 0.560636355 |
| ENSGALG00010016863 | 0.968278859 | 0.294174979 |
| ENSGALG00010016864 | 0.236836204 | 0.236412506 |
| ENSGALG00010016865 | 0.935902199 | 0.371588786 |
| ENSGALG00010016866 | 0.986446958 | 0.350360787 |
| ENSGALG00010016867 | 0.705004197 | 0.198861639 |
| ENSGALG00010016868 | 0.799308067 | 0.168536485 |
| ENSGALG00010016869 | 0.089760662 | 0.103921741 |
| ENSGALG00010016870 | 0.37023851  | 0.413234014 |
| ENSGALG00010016872 | 0.879239974 | 0.306827925 |
| ENSGALG00010016873 | 0.933014815 | 0.026776609 |
| ENSGALG00010016874 | 0.905139139 | 0.284601311 |
| ENSGALG00010016875 | 0.850832617 | 0.160498435 |
| ENSGALG00010016876 | 0.852962447 | 0.104413585 |
| ENSGALG00010016877 | 0.938225167 | 0.212759573 |
| ENSGALG00010016878 | 0.988410145 | 0.344066602 |
| ENSGALG00010016879 | 0.894944195 | 0.186040265 |
| ENSGALG00010016880 | 0.87521319  | 0.074867914 |
| ENSGALG00010016881 | 0.974611107 | 0.295332913 |
| ENSGALG00010016882 | 0.952154552 | 0.332281318 |
| ENSGALG00010016883 | 0.931454214 | 0.106005368 |
| ENSGALG00010016884 | 0.96913974  | 0.346892086 |
| ENSGALG00010016885 | 0.472663836 | 0.118491751 |
| ENSGALG00010016887 | 0.954304469 | 0.291248297 |
| ENSGALG00010016888 | 0.605612193 | 0.213034196 |
| ENSGALG00010016889 | 0.980186175 | 0.336255172 |
| ENSGALG00010016890 | 0.062763256 | 0.13762019  |
| ENSGALG00010016891 | 0.428321792 | 0.072217874 |
| ENSGALG00010016892 | 0.097404455 | 0.078746816 |
| ENSGALG00010016893 | 0.80905541  | 0.385982379 |
| ENSGALG00010016894 | 0.558607002 | 0.140187754 |
| ENSGALG00010016895 | 0.26909056  | 0.238139731 |
| ENSGALG00010016896 | 0.70191657  | 0.131458763 |
| ENSGALG00010016897 | 0.42301224  | 0.007930546 |
| ENSGALG00010016899 | 0.917544676 | 0.331321433 |
| ENSGALG00010016900 | 0.85183972  | 0.333368725 |
| ENSGALG00010016901 | 0.413488808 | 0.258811614 |
| ENSGALG00010016902 | 0.397793307 | 0.136785604 |
| ENSGALG00010016903 | 0.935741086 | 0.258991616 |
| ENSGALG00010016904 | 0.878858347 | 0.183048273 |

|                    |             |             |
|--------------------|-------------|-------------|
| ENSGALG00010016905 | 0.959121213 | 0.262133416 |
| ENSGALG00010016907 | 0.433538767 | 0.193137182 |
| ENSGALG00010016908 | 0.969713731 | 0.267303135 |
| ENSGALG00010016909 | 0.575987681 | 0.265489419 |
| ENSGALG00010016910 | 0.843720946 | 0.251189013 |
| ENSGALG00010016911 | 0.861041085 | 0.251620061 |
| ENSGALG00010016912 | 0.837430266 | 0.215618109 |
| ENSGALG00010016913 | 0.396699027 | 0.226585893 |
| ENSGALG00010016914 | 0.209038957 | 0.052196575 |
| ENSGALG00010016915 | 0.921221098 | 0.223349214 |
| ENSGALG00010016916 | 0.995814823 | 0.317131713 |
| ENSGALG00010016917 | 0.877614222 | 0.155846822 |
| ENSGALG00010016918 | 0.825516097 | 0.243014578 |
| ENSGALG00010016919 | 0.841267191 | 0.284123927 |
| ENSGALG00010016920 | 0.981593459 | 0.250943822 |
| ENSGALG00010016921 | 0.345491692 | 0.482412701 |
| ENSGALG00010016922 | 0.293985649 | 0.453685798 |
| ENSGALG00010016923 | 0.673928746 | 0.269819078 |
| ENSGALG00010016924 | 0.261073952 | 0.119572608 |
| ENSGALG00010016925 | 0.659178297 | 0.196298564 |
| ENSGALG00010016926 | 0.040232552 | 0.433250674 |
| ENSGALG00010016927 | 0.875886292 | 0.247358975 |
| ENSGALG00010016928 | 0.759869117 | 0.311999838 |
| ENSGALG00010016929 | 0.304978835 | 0.12191445  |
| ENSGALG00010016930 | 0.901307395 | 0.288430031 |
| ENSGALG00010016931 | 0.618596893 | 0.175370641 |
| ENSGALG00010016932 | 0.809176524 | 0.357633817 |
| ENSGALG00010016933 | 0.717821057 | 0.064290785 |
| ENSGALG00010016934 | 0.333982889 | 0.287104687 |
| ENSGALG00010016935 | 0.951254361 | 0.303486359 |
| ENSGALG00010016936 | 0.956628296 | 0.326197408 |
| ENSGALG00010016937 | 0.994149039 | 0.296882601 |
| ENSGALG00010016938 | 0.303508198 | 0.409726521 |
| ENSGALG00010016939 | 0.981267817 | 0.267769635 |
| ENSGALG00010016940 | 0.98066465  | 0.363456354 |
| ENSGALG00010016941 | 0.8193455   | 0.138167874 |
| ENSGALG00010016942 | 0.478605851 | 0.139358175 |
| ENSGALG00010016943 | 0.799691273 | 0.141719483 |
| ENSGALG00010016944 | 0.050564    | 0.120729262 |
| ENSGALG00010016945 | 0.972668466 | 0.42869222  |
| ENSGALG00010016946 | 0.992864443 | 0.286526798 |
| ENSGALG00010016947 | 0.983569886 | 0.250934987 |
| ENSGALG00010016948 | 0.7690025   | 0.183408986 |
| ENSGALG00010016949 | 0.730103411 | 0.287986403 |
| ENSGALG00010016950 | 0.737986284 | 0.314879896 |
| ENSGALG00010016951 | 0.975661399 | 0.36047349  |
| ENSGALG00010016952 | 0.53223597  | 0.286650162 |
| ENSGALG00010016953 | 0.111935284 | 0.074526226 |
| ENSGALG00010016955 | 0.691443501 | 0.40963159  |
| ENSGALG00010016956 | 0.778923712 | 0.272994589 |
| ENSGALG00010016957 | 0.822529149 | 0.228493929 |
| ENSGALG00010016958 | 0.624798952 | 0.150568029 |
| ENSGALG00010016959 | 0.655725183 | 0.274846711 |
| ENSGALG00010016960 | 0.372397461 | 0.026267902 |
| ENSGALG00010016961 | 0.335891967 | 0.16849738  |
| ENSGALG00010016962 | 0.038871183 | 0.142553515 |

|                    |             |             |
|--------------------|-------------|-------------|
| ENSGALG00010016963 | 0.83220226  | 0.350073296 |
| ENSGALG00010016964 | 0.943472601 | 0.290675908 |
| ENSGALG00010016965 | 0.880070373 | 0.303367895 |
| ENSGALG00010016966 | 0.564782563 | 0.0182566   |
| ENSGALG00010016967 | 0.906638395 | 0.367617469 |
| ENSGALG00010016968 | 0.974805828 | 0.32160973  |
| ENSGALG00010016969 | 0.9832842   | 0.322495601 |
| ENSGALG00010016970 | 0.854191145 | 0.275688022 |
| ENSGALG00010016971 | 0.369981499 | 0.264773568 |
| ENSGALG00010016972 | 0.007814858 | 0.127811066 |
| ENSGALG00010016973 | 0.652978782 | 0.214261526 |
| ENSGALG00010016974 | 0.380793985 | 0.176306365 |
| ENSGALG00010016975 | 0.049882549 | 0.26275067  |
| ENSGALG00010016976 | 0.819607822 | 0.140042749 |
| ENSGALG00010016977 | 0.038903348 | 0.022762323 |
| ENSGALG00010016978 | 0.929181227 | 0.223094329 |
| ENSGALG00010016979 | 0.383947044 | 0.128562519 |
| ENSGALG00010016980 | 0.539128446 | 0.097974642 |
| ENSGALG00010016981 | 0.90069054  | 0.257953683 |
| ENSGALG00010016982 | 0.621994765 | 0.100279203 |
| ENSGALG00010016983 | 0.227838373 | 0.034538273 |
| ENSGALG00010016984 | 0.762347793 | 0.388360272 |
| ENSGALG00010016985 | 0.174722339 | 0.063496408 |
| ENSGALG00010016986 | 0.900781877 | 0.226077957 |
| ENSGALG00010016987 | 0.916033639 | 0.224496849 |
| ENSGALG00010016988 | 0.886154524 | 0.184528031 |
| ENSGALG00010016989 | 0.769425681 | 0.158803806 |
| ENSGALG00010016991 | 0.989411723 | 0.314479491 |
| ENSGALG00010016992 | 0.825957283 | 0.18154777  |
| ENSGALG00010016993 | 0.935799236 | 0.255404475 |
| ENSGALG00010016994 | 0.906767113 | 0.257519394 |
| ENSGALG00010016995 | 0.938208151 | 0.346502951 |
| ENSGALG00010016996 | 0.684801254 | 0.358099128 |
| ENSGALG00010016998 | 0.874211603 | 0.125822869 |
| ENSGALG00010016999 | 0.992755324 | 0.355441538 |
| ENSGALG00010017000 | 0.04875482  | 0.180301697 |
| ENSGALG00010017001 | 0.1711804   | 0.032623259 |
| ENSGALG00010017002 | 0.765747031 | 0.131076514 |
| ENSGALG00010017003 | 0.829600291 | 0.419051577 |
| ENSGALG00010017004 | 0.968851849 | 0.195787315 |
| ENSGALG00010017006 | 0.785999679 | 0.157856966 |
| ENSGALG00010017008 | 0.961707637 | 0.33627684  |
| ENSGALG00010017010 | 0.314312913 | 0.300052519 |
| ENSGALG00010017011 | 0.638074004 | 0.078030583 |
| ENSGALG00010017012 | 0.98911454  | 0.34977737  |
| ENSGALG00010017013 | 0.44682585  | 0.150075723 |
| ENSGALG00010017014 | 0.057863266 | 0.091469403 |
| ENSGALG00010017015 | 0.247518097 | 0.193646827 |
| ENSGALG00010017016 | 0.391395104 | 0.158003851 |
| ENSGALG00010017017 | 0.315512486 | 0.171285599 |
| ENSGALG00010017018 | 0.918619161 | 0.192632019 |
| ENSGALG00010017019 | 0.519431689 | 0.204839096 |
| ENSGALG00010017020 | 0.024459739 | 0.181034195 |
| ENSGALG00010017021 | 0.400215036 | 0.132215663 |
| ENSGALG00010017022 | 0.640378443 | 0.001786785 |
| ENSGALG00010017024 | 0.75267692  | 0.211839103 |

|                    |             |             |
|--------------------|-------------|-------------|
| ENSGALG00010017027 | 0.760085585 | 0.03851519  |
| ENSGALG00010017029 | 0.77289795  | 0.297203314 |
| ENSGALG00010017030 | 0.843574735 | 0.542718072 |
| ENSGALG00010017032 | 0.341811318 | 0.527341176 |
| ENSGALG00010017033 | 0.987047516 | 0.354450652 |
| ENSGALG00010017034 | 0.437738318 | 0.0978347   |
| ENSGALG00010017035 | 0.989159422 | 0.298333031 |
| ENSGALG00010017038 | 0.214668377 | 0.322849606 |
| ENSGALG00010017039 | 0.715360868 | 0.136424808 |
| ENSGALG00010017040 | 0.02337546  | 0.15959425  |
| ENSGALG00010017041 | 0.6763219   | 0.323997603 |
| ENSGALG00010017042 | 0.884956926 | 0.311429356 |
| ENSGALG00010017043 | 0.030686825 | 0.45212583  |
| ENSGALG00010017044 | 0.424270929 | 0.173825238 |
| ENSGALG00010017045 | 0.922804057 | 0.156073028 |
| ENSGALG00010017046 | 0.31068245  | 0.189010659 |
| ENSGALG00010017047 | 0.481627181 | 0.371195624 |
| ENSGALG00010017049 | 0.80038872  | 0.427430561 |
| ENSGALG00010017050 | 0.416138999 | 0.068251873 |
| ENSGALG00010017052 | 0.09769597  | 0.256883266 |
| ENSGALG00010017053 | 0.865336018 | 0.31888527  |
| ENSGALG00010017054 | 0.963266199 | 0.302569013 |
| ENSGALG00010017055 | 0.58452392  | 0.142293925 |
| ENSGALG00010017056 | 0.872404848 | 0.355014021 |
| ENSGALG00010017057 | 0.807139682 | 0.313271006 |
| ENSGALG00010017058 | 0.353306567 | 0.159752261 |
| ENSGALG00010017060 | 0.896256421 | 0.34765607  |
| ENSGALG00010017061 | 0.850053312 | 0.395320683 |
| ENSGALG00010017062 | 0.142503903 | 0.100429809 |
| ENSGALG00010017063 | 0.939954766 | 0.196281564 |
| ENSGALG00010017065 | 0.753820638 | 0.293191775 |
| ENSGALG00010017068 | 0.490560405 | 0.360798996 |
| ENSGALG00010017070 | 0.88190452  | 0.298591427 |
| ENSGALG00010017071 | 0.628974201 | 0.121025125 |
| ENSGALG00010017073 | 0.862574511 | 0.267955868 |
| ENSGALG00010017074 | 0.825933196 | 0.306437124 |
| ENSGALG00010017075 | 0.782860247 | 0.408480981 |
| ENSGALG00010017077 | 0.957571212 | 0.356771632 |
| ENSGALG00010017078 | 0.035387674 | 0.035601977 |
| ENSGALG00010017079 | 0.530752511 | 0.347460603 |
| ENSGALG00010017080 | 0.566077628 | 0.085889457 |
| ENSGALG00010017083 | 0.76081873  | 0.23090358  |
| ENSGALG00010017085 | 0.960311071 | 0.324404374 |
| ENSGALG00010017088 | 0.29339099  | 0.433285595 |
| ENSGALG00010017089 | 0.743788695 | 0.387703333 |
| ENSGALG00010017090 | 0.009876626 | 0.286589717 |
| ENSGALG00010017091 | 0.598669277 | 0.113971987 |
| ENSGALG00010017092 | 0.509804734 | 0.130051195 |
| ENSGALG00010017093 | 0.387408492 | 0.038314914 |
| ENSGALG00010017094 | 0.989787508 | 0.303168976 |
| ENSGALG00010017095 | 0.291895501 | 0.15301281  |
| ENSGALG00010017096 | 0.409636587 | 0.55843813  |
| ENSGALG00010017097 | 0.568901522 | 0.167200803 |
| ENSGALG00010017098 | 0.943033355 | 0.196380806 |
| ENSGALG00010017100 | 0.103884623 | 0.06798884  |
| ENSGALG00010017101 | 0.444823664 | 0.397613018 |

|                    |             |             |
|--------------------|-------------|-------------|
| ENSGALG00010017102 | 0.034007678 | 0.115333164 |
| ENSGALG00010017103 | 0.451553087 | 0.120227008 |
| ENSGALG00010017104 | 0.877096434 | 0.169556566 |
| ENSGALG00010017105 | 0.589354346 | 0.125715389 |
| ENSGALG00010017106 | 0.935088281 | 0.132292438 |
| ENSGALG00010017109 | 0.969575399 | 0.329036556 |
| ENSGALG00010017110 | 0.508080511 | 0.202321484 |
| ENSGALG00010017111 | 0.990457433 | 0.273121359 |
| ENSGALG00010017112 | 0.945348492 | 0.233026638 |
| ENSGALG00010017114 | 0.094214503 | 0.128734632 |
| ENSGALG00010017115 | 0.962180077 | 0.331301648 |
| ENSGALG00010017116 | 0.193019462 | 0.153232988 |
| ENSGALG00010017118 | 0.263548636 | 0.341804522 |
| ENSGALG00010017119 | 0.96411524  | 0.326611604 |
| ENSGALG00010017120 | 0.911170949 | 0.320854435 |
| ENSGALG00010017121 | 0.144103871 | 0.025345762 |
| ENSGALG00010017122 | 0.299652785 | 0.028471245 |
| ENSGALG00010017124 | 0.271701261 | 0.072417625 |
| ENSGALG00010017125 | 0.213450411 | 0.147848948 |
| ENSGALG00010017126 | 0.987715877 | 0.233592136 |
| ENSGALG00010017127 | 0.943489541 | 0.341820503 |
| ENSGALG00010017128 | 0.470617807 | 0.148833615 |
| ENSGALG00010017129 | 0.671896127 | 0.424436859 |
| ENSGALG00010017131 | 0.967281949 | 0.371788515 |
| ENSGALG00010017132 | 0.106358205 | 0.106765945 |
| ENSGALG00010017133 | 0.76317893  | 0.497772402 |
| ENSGALG00010017134 | 0.270451009 | 0.090541667 |
| ENSGALG00010017135 | 0.315392201 | 0.038781939 |
| ENSGALG00010017136 | 0.467966181 | 0.316061604 |
| ENSGALG00010017137 | 0.269272437 | 0.073182666 |
| ENSGALG00010017138 | 0.467018431 | 0.073431361 |
| ENSGALG00010017139 | 0.810796383 | 0.270589464 |
| ENSGALG00010017140 | 0.673767869 | 0.296218992 |
| ENSGALG00010017141 | 0.953032091 | 0.452358481 |
| ENSGALG00010017142 | 0.97098173  | 0.280271555 |
| ENSGALG00010017143 | 0.977245418 | 0.29301184  |
| ENSGALG00010017144 | 0.321440542 | 0.080101054 |
| ENSGALG00010017145 | 0.580402188 | 0.222866202 |
| ENSGALG00010017147 | 0.544232311 | 0.530895175 |
| ENSGALG00010017148 | 0.481271616 | 0.133297069 |
| ENSGALG00010017149 | 0.384897716 | 0.112786777 |
| ENSGALG00010017150 | 0.61482352  | 0.050520512 |
| ENSGALG00010017151 | 0.932038788 | 0.443682016 |
| ENSGALG00010017152 | 0.991130202 | 0.289269534 |
| ENSGALG00010017153 | 0.437103749 | 0.012674061 |
| ENSGALG00010017154 | 0.512194375 | 0.240993356 |
| ENSGALG00010017156 | 0.817053423 | 0.548260608 |
| ENSGALG00010017157 | 0.397860288 | 0.045886469 |
| ENSGALG00010017158 | 0.530324799 | 0.19678275  |
| ENSGALG00010017159 | 0.407680041 | 0.161965077 |
| ENSGALG00010017160 | 0.073376936 | 0.164024345 |
| ENSGALG00010017161 | 0.986028162 | 0.334584006 |
| ENSGALG00010017162 | 0.506323298 | 0.027914306 |
| ENSGALG00010017163 | 0.378406323 | 0.485627561 |
| ENSGALG00010017164 | 0.270451009 | 0.090541667 |
| ENSGALG00010017165 | 0.982770543 | 0.329091923 |

|                    |             |             |
|--------------------|-------------|-------------|
| ENSGALG00010017166 | 0.296272339 | 0.491563762 |
| ENSGALG00010017167 | 0.916535754 | 0.245382473 |
| ENSGALG00010017169 | 0.444741259 | 0.214470928 |
| ENSGALG00010017172 | 0.197063832 | 0.359582983 |
| ENSGALG00010017174 | 0.803126494 | 0.261058663 |
| ENSGALG00010017176 | 0.115511175 | 0.303927215 |
| ENSGALG00010017180 | 0.112526779 | 0.034368165 |
| ENSGALG00010017182 | 0.320729011 | 0.144028995 |
| ENSGALG00010017183 | 0.319432253 | 0.226386267 |
| ENSGALG00010017184 | 0.917154207 | 0.128417488 |
| ENSGALG00010017185 | 0.981706144 | 0.242217884 |
| ENSGALG00010017186 | 0.767318044 | 0.36455075  |
| ENSGALG00010017187 | 0.775733273 | 0.274588852 |
| ENSGALG00010017188 | 0.722903729 | 0.133379687 |
| ENSGALG00010017190 | 0.942085453 | 0.469959499 |
| ENSGALG00010017192 | 0.556171307 | 0.201218857 |
| ENSGALG00010017193 | 0.959070523 | 0.336832616 |
| ENSGALG00010017195 | 0.682426665 | 0.075555835 |
| ENSGALG00010017197 | 0.026501066 | 0.052690148 |
| ENSGALG00010017198 | 0.607433668 | 0.05925068  |
| ENSGALG00010017199 | 0.516484792 | 0.358831355 |
| ENSGALG00010017200 | 0.232006413 | 0.261085152 |
| ENSGALG00010017201 | 0.846961243 | 0.159211053 |
| ENSGALG00010017202 | 0.309031157 | 0.31725819  |
| ENSGALG00010017204 | 0.743496993 | 0.321518133 |
| ENSGALG00010017205 | 0.737692653 | 0.282996941 |
| ENSGALG00010017206 | 0.359924451 | 0.169240891 |
| ENSGALG00010017207 | 0.983322909 | 0.331107836 |
| ENSGALG00010017208 | 0.915940232 | 0.261599654 |
| ENSGALG00010017209 | 0.634144537 | 0.033246729 |
| ENSGALG00010017211 | 0.982829362 | 0.293553473 |
| ENSGALG00010017212 | 0.556973957 | 0.42524659  |
| ENSGALG00010017214 | 0.535583747 | 0.068695955 |
| ENSGALG00010017215 | 0.895650475 | 0.237653089 |
| ENSGALG00010017216 | 0.051606007 | 0.145348651 |
| ENSGALG00010017218 | 0.261326278 | 0.156713752 |
| ENSGALG00010017219 | 0.679258023 | 0.199507063 |
| ENSGALG00010017221 | 0.753390742 | 0.219758739 |
| ENSGALG00010017222 | 0.685350045 | 0.062524292 |
| ENSGALG00010017223 | 0.344391634 | 0.119875951 |
| ENSGALG00010017224 | 0.557976166 | 0.031252929 |
| ENSGALG00010017225 | 0.19754544  | 0.177927375 |
| ENSGALG00010017226 | 0.620712866 | 0.448020442 |
| ENSGALG00010017227 | 0.063683658 | 0.087267703 |
| ENSGALG00010017228 | 0.486363446 | 0.091558152 |
| ENSGALG00010017229 | 0.698194684 | 0.37643124  |
| ENSGALG00010017230 | 0.834408618 | 0.31087318  |
| ENSGALG00010017231 | 0.771222549 | 0.380689665 |
| ENSGALG00010017234 | 0.511974447 | 0.015653456 |
| ENSGALG00010017235 | 0.345957381 | 0.377989906 |
| ENSGALG00010017237 | 0.60987391  | 0.023802721 |
| ENSGALG00010017240 | 0.91763033  | 0.242041905 |
| ENSGALG00010017246 | 0.371767508 | 0.345509902 |
| ENSGALG00010017248 | 0.918483714 | 0.163505619 |
| ENSGALG00010017250 | 0.683330431 | 0.238568257 |
| ENSGALG00010017251 | 0.301952912 | 0.225538146 |

|                    |             |             |
|--------------------|-------------|-------------|
| ENSGALG00010017252 | 0.032247106 | 0.068242938 |
| ENSGALG00010017253 | 0.176223345 | 0.19443888  |
| ENSGALG00010017254 | 0.366688394 | 0.154271198 |
| ENSGALG00010017255 | 0.765714645 | 0.232919177 |
| ENSGALG00010017256 | 0.966264253 | 0.330536478 |
| ENSGALG00010017258 | 0.248794789 | 0.225810363 |
| ENSGALG00010017260 | 0.601786635 | 0.200707696 |
| ENSGALG00010017262 | 0.404167701 | 0.144831306 |
| ENSGALG00010017263 | 0.809376506 | 0.256910798 |
| ENSGALG00010017264 | 0.659119463 | 0.345494699 |
| ENSGALG00010017265 | 0.659171246 | 0.180780359 |
| ENSGALG00010017266 | 0.974595784 | 0.413099561 |
| ENSGALG00010017270 | 0.812789995 | 0.365867978 |
| ENSGALG00010017272 | 0.594682544 | 0.487032014 |
| ENSGALG00010017274 | 0.69437292  | 0.331690821 |
| ENSGALG00010017276 | 0.378386997 | 0.131934372 |
| ENSGALG00010017278 | 0.904639044 | 0.434135633 |
| ENSGALG00010017280 | 0.808337507 | 0.214695305 |
| ENSGALG00010017281 | 0.882825502 | 0.170032239 |
| ENSGALG00010017283 | 0.994246313 | 0.312288348 |
| ENSGALG00010017284 | 0.920837602 | 0.200139121 |
| ENSGALG00010017285 | 0.946061944 | 0.320973721 |
| ENSGALG00010017286 | 0.732712798 | 0.206011873 |
| ENSGALG00010017289 | 0.464411218 | 0.028446036 |
| ENSGALG00010017290 | 0.536339396 | 0.239070185 |
| ENSGALG00010017292 | 0.665617349 | 0.199598922 |
| ENSGALG00010017293 | 0.946970157 | 0.321864591 |
| ENSGALG00010017294 | 0.406377991 | 0.538354817 |
| ENSGALG00010017295 | 0.379098883 | 0.108694718 |
| ENSGALG00010017296 | 0.920971328 | 0.306976366 |
| ENSGALG00010017297 | 0.97522469  | 0.260199781 |
| ENSGALG00010017299 | 0.360546224 | 0.12646624  |
| ENSGALG00010017300 | 0.982723164 | 0.418893443 |
| ENSGALG00010017301 | 0.387718767 | 0.276994253 |
| ENSGALG00010017304 | 0.972186977 | 0.332602035 |
| ENSGALG00010017305 | 0.512921639 | 0.130657483 |
| ENSGALG00010017306 | 0.531961048 | 0.261320476 |
| ENSGALG00010017307 | 0.429829999 | 0.32596791  |
| ENSGALG00010017308 | 0.560966986 | 0.10688555  |
| ENSGALG00010017309 | 0.405797923 | 0.13200104  |
| ENSGALG00010017310 | 0.703570757 | 0.111619771 |
| ENSGALG00010017311 | 0.064841871 | 0.131229091 |
| ENSGALG00010017312 | 0.985896304 | 0.238987485 |
| ENSGALG00010017313 | 0.394312958 | 0.021415714 |
| ENSGALG00010017314 | 0.42580478  | 0.041827627 |
| ENSGALG00010017315 | 0.199488819 | 0.094321839 |
| ENSGALG00010017318 | 0.994811544 | 0.304092362 |
| ENSGALG00010017319 | 0.665868481 | 0.052453343 |
| ENSGALG00010017320 | 0.707425468 | 0.416157882 |
| ENSGALG00010017322 | 0.877931258 | 0.295168997 |
| ENSGALG00010017323 | 0.563856724 | 0.383239953 |
| ENSGALG00010017325 | 0.667054751 | 0.070901223 |
| ENSGALG00010017326 | 0.781053172 | 0.29811852  |
| ENSGALG00010017327 | 0.972086644 | 0.27877666  |
| ENSGALG00010017330 | 0.823410408 | 0.124341464 |
| ENSGALG00010017332 | 0.969389104 | 0.343733432 |



|                    |             |             |
|--------------------|-------------|-------------|
| ENSGALG00010017334 | 0.332399589 | 0.113427957 |
| ENSGALG00010017335 | 0.00014904  | 0.169563208 |
| ENSGALG00010017337 | 0.719188789 | 0.454637804 |
| ENSGALG00010017338 | 0.873508957 | 0.129879469 |
| ENSGALG00010017339 | 0.884131246 | 0.294913322 |
| ENSGALG00010017340 | 0.888574956 | 0.296296337 |
| ENSGALG00010017341 | 0.361887629 | 0.128498832 |
| ENSGALG00010017342 | 0.473033189 | 0.126932614 |
| ENSGALG00010017343 | 0.136662935 | 0.211990407 |
| ENSGALG00010017344 | 0.989821448 | 0.278122315 |
| ENSGALG00010017345 | 0.187514554 | 0.108479243 |
| ENSGALG00010017346 | 0.957553317 | 0.286725704 |
| ENSGALG00010017347 | 0.447755468 | 0.081634798 |
| ENSGALG00010017349 | 0.021527755 | 0.295737633 |
| ENSGALG00010017350 | 0.990661515 | 0.345211731 |
| ENSGALG00010017351 | 0.978744348 | 0.318900061 |
| ENSGALG00010017352 | 0.592757704 | 0.725010621 |
| ENSGALG00010017354 | 0.834344857 | 0.248541475 |
| ENSGALG00010017355 | 0.352478527 | 0.272458233 |
| ENSGALG00010017356 | 0.432188719 | 0.078920009 |
| ENSGALG00010017358 | 0.493431099 | 0.187927311 |
| ENSGALG00010017359 | 0.708997671 | 0.335532128 |
| ENSGALG00010017361 | 0.920003906 | 0.243506542 |
| ENSGALG00010017362 | 0.904721281 | 0.263152387 |
| ENSGALG00010017363 | 0.202692128 | 0.133815772 |
| ENSGALG00010017364 | 0.966616505 | 0.340438978 |
| ENSGALG00010017365 | 0.962505566 | 0.227189102 |
| ENSGALG00010017367 | 0.97752721  | 0.333947477 |
| ENSGALG00010017368 | 0.323514001 | 0.068799813 |
| ENSGALG00010017369 | 0.023500597 | 0.155340452 |
| ENSGALG00010017372 | 0.907596102 | 0.276107056 |
| ENSGALG00010017373 | 0.433271604 | 0.089781439 |
| ENSGALG00010017374 | 0.263768666 | 0.29094256  |
| ENSGALG00010017375 | 0.967239052 | 0.376690128 |
| ENSGALG00010017376 | 0.656914507 | 0.020361484 |
| ENSGALG00010017377 | 0.55122186  | 0.141301778 |
| ENSGALG00010017378 | 0.732332648 | 0.502177995 |
| ENSGALG00010017380 | 0.095322368 | 0.088460471 |
| ENSGALG00010017381 | 0.620313372 | 0.285608351 |
| ENSGALG00010017382 | 0.727815022 | 0.331252355 |
| ENSGALG00010017383 | 0.4479925   | 0.382197937 |
| ENSGALG00010017384 | 0.966419215 | 0.256783441 |
| ENSGALG00010017385 | 0.088179649 | 0.287182419 |
| ENSGALG00010017386 | 0.645801469 | 0.300576002 |
| ENSGALG00010017387 | 0.817260138 | 0.251254787 |
| ENSGALG00010017388 | 0.404493179 | 0.072574432 |
| ENSGALG00010017389 | 0.086741006 | 0.127231402 |
| ENSGALG00010017390 | 0.870465699 | 0.195336288 |
| ENSGALG00010017391 | 0.812451483 | 0.291692453 |
| ENSGALG00010017393 | 0.984657341 | 0.259786319 |
| ENSGALG00010017394 | 0.207045062 | 0.119048488 |
| ENSGALG00010017395 | 0.927813135 | 0.260015142 |
| ENSGALG00010017396 | 0.928377753 | 0.335817001 |
| ENSGALG00010017398 | 0.990682009 | 0.34273316  |
| ENSGALG00010017399 | 0.802944571 | 0.406745471 |
| ENSGALG00010017400 | 0.876469575 | 0.313881962 |

|                    |             |             |
|--------------------|-------------|-------------|
| ENSGALG00010017402 | 0.960456275 | 0.451191997 |
| ENSGALG00010017403 | 0.553833062 | 0.40146269  |
| ENSGALG00010017405 | 0.958820022 | 0.209284133 |
| ENSGALG00010017406 | 0.589687944 | 0.273079133 |
| ENSGALG00010017407 | 0.359986475 | 0.089989034 |
| ENSGALG00010017408 | 0.264239718 | 0.073427965 |
| ENSGALG00010017409 | 0.635519237 | 0.447570536 |
| ENSGALG00010017411 | 0.870821551 | 0.240572436 |
| ENSGALG00010017413 | 0.203991683 | 0.058221925 |
| ENSGALG00010017414 | 0.934286354 | 0.360636402 |
| ENSGALG00010017415 | 0.975332708 | 0.316050963 |
| ENSGALG00010017418 | 0.482621303 | 0.03737141  |
| ENSGALG00010017419 | 0.517001087 | 0.087503678 |
| ENSGALG00010017421 | 0.833975918 | 0.224846675 |
| ENSGALG00010017422 | 0.622881316 | 0.233174266 |
| ENSGALG00010017423 | 0.873852591 | 0.216238696 |
| ENSGALG00010017424 | 0.935717287 | 0.244311919 |
| ENSGALG00010017425 | 0.985672771 | 0.327252829 |
| ENSGALG00010017428 | 0.936081048 | 0.292815846 |
| ENSGALG00010017429 | 0.802333447 | 0.346704523 |
| ENSGALG00010017430 | 0.397406754 | 0.190153304 |
| ENSGALG00010017431 | 0.926731971 | 0.315331771 |
| ENSGALG00010017433 | 0.720044555 | 0.124897654 |
| ENSGALG00010017434 | 0.992227552 | 0.3190973   |
| ENSGALG00010017435 | 0.864806998 | 0.263982178 |
| ENSGALG00010017437 | 0.90334649  | 0.367005439 |
| ENSGALG00010017439 | 0.883683998 | 0.252620599 |
| ENSGALG00010017440 | 0.582239405 | 0.167272153 |
| ENSGALG00010017441 | 0.90045185  | 0.211638864 |
| ENSGALG00010017442 | 0.916279054 | 0.352651325 |
| ENSGALG00010017445 | 0.994344875 | 0.262738331 |
| ENSGALG00010017447 | 0.950666955 | 0.328488586 |
| ENSGALG00010017448 | 0.18954039  | 0.293505383 |
| ENSGALG00010017449 | 0.761253705 | 0.547209605 |
| ENSGALG00010017450 | 0.453151065 | 0.15324544  |
| ENSGALG00010017451 | 0.914770317 | 0.457652459 |
| ENSGALG00010017452 | 0.1989348   | 0.118792223 |
| ENSGALG00010017453 | 0.990439715 | 0.316693964 |
| ENSGALG00010017454 | 0.961472274 | 0.301058899 |
| ENSGALG00010017455 | 0.961191895 | 0.260210864 |
| ENSGALG00010017456 | 0.315876731 | 0.251108411 |
| ENSGALG00010017457 | 0.52247484  | 0.180840599 |
| ENSGALG00010017458 | 0.961827015 | 0.33269702  |
| ENSGALG00010017459 | 0.879656216 | 0.384296409 |
| ENSGALG00010017460 | 0.99681897  | 0.338127351 |
| ENSGALG00010017461 | 0.356536265 | 0.161495931 |
| ENSGALG00010017462 | 0.803515121 | 0.355990934 |
| ENSGALG00010017463 | 0.786789719 | 0.192197909 |
| ENSGALG00010017464 | 0.935223318 | 0.280264298 |
| ENSGALG00010017465 | 0.743836997 | 0.174975562 |
| ENSGALG00010017466 | 0.996820149 | 0.337415738 |
| ENSGALG00010017467 | 0.949255686 | 0.324067422 |
| ENSGALG00010017468 | 0.448061099 | 0.084908372 |
| ENSGALG00010017469 | 0.808287847 | 0.311571307 |
| ENSGALG00010017470 | 0.936298827 | 0.251429588 |
| ENSGALG00010017471 | 0.21648972  | 0.139950938 |

|                    |             |             |
|--------------------|-------------|-------------|
| ENSGALG00010017472 | 0.066716362 | 0.004473822 |
| ENSGALG00010017473 | 0.794435232 | 0.275700039 |
| ENSGALG00010017474 | 0.895221416 | 0.310612214 |
| ENSGALG00010017475 | 0.940607925 | 0.419452211 |
| ENSGALG00010017476 | 0.951651781 | 0.332692331 |
| ENSGALG00010017477 | 0.962337627 | 0.328537781 |
| ENSGALG00010017478 | 0.283529993 | 0.098309861 |
| ENSGALG00010017479 | 0.013836069 | 0.008004162 |
| ENSGALG00010017480 | 0.59147871  | 0.045187536 |
| ENSGALG00010017481 | 0.997267805 | 0.335491674 |
| ENSGALG00010017482 | 0.952887474 | 0.441039847 |
| ENSGALG00010017483 | 0.729498148 | 0.216893087 |
| ENSGALG00010017484 | 0.731098951 | 0.274961416 |
| ENSGALG00010017485 | 0.88299168  | 0.196402164 |
| ENSGALG00010017486 | 0.347091119 | 0.431574999 |
| ENSGALG00010017487 | 0.771319805 | 0.309133699 |
| ENSGALG00010017488 | 0.460815871 | 0.107439019 |
| ENSGALG00010017489 | 0.972956951 | 0.293219327 |
| ENSGALG00010017490 | 0.049201542 | 0.077915163 |
| ENSGALG00010017491 | 0.665535365 | 0.422530731 |
| ENSGALG00010017493 | 0.66510151  | 0.097593354 |
| ENSGALG00010017494 | 0.916442016 | 0.47351924  |
| ENSGALG00010017495 | 0.441148347 | 0.022208272 |
| ENSGALG00010017496 | 0.049731361 | 0.245677174 |
| ENSGALG00010017499 | 0.01258272  | 0.094273745 |
| ENSGALG00010017500 | 0.740104494 | 0.240064487 |
| ENSGALG00010017501 | 0.997434861 | 0.336004222 |
| ENSGALG00010017502 | 0.868084153 | 0.353058203 |
| ENSGALG00010017503 | 0.982522707 | 0.302502195 |
| ENSGALG00010017505 | 0.146667765 | 0.056160849 |
| ENSGALG00010017506 | 0.009565724 | 0.089300248 |
| ENSGALG00010017509 | 0.961047441 | 0.245711693 |
| ENSGALG00010017510 | 0.875352386 | 0.134896855 |
| ENSGALG00010017512 | 0.997024343 | 0.335984588 |
| ENSGALG00010017513 | 0.760335081 | 0.121343636 |
| ENSGALG00010017514 | 0.561478937 | 0.100543333 |
| ENSGALG00010017515 | 0.99548951  | 0.335505765 |
| ENSGALG00010017516 | 0.401863969 | 0.119614576 |
| ENSGALG00010017517 | 0.730221675 | 0.47315466  |
| ENSGALG00010017518 | 0.902853058 | 0.290204524 |
| ENSGALG00010017519 | 0.44448616  | 0.263136237 |
| ENSGALG00010017520 | 0.929418762 | 0.400485445 |
| ENSGALG00010017521 | 0.680664093 | 0.566297279 |
| ENSGALG00010017522 | 0.910485594 | 0.200533736 |
| ENSGALG00010017524 | 0.420503369 | 0.255048054 |
| ENSGALG00010017525 | 0.862057274 | 0.199743042 |
| ENSGALG00010017526 | 0.91491399  | 0.111262572 |
| ENSGALG00010017527 | 0.954004115 | 0.323764817 |
| ENSGALG00010017528 | 0.846545524 | 0.062803598 |
| ENSGALG00010017529 | 0.917997252 | 0.313740566 |
| ENSGALG00010017530 | 0.943652214 | 0.222497632 |
| ENSGALG00010017531 | 0.98410078  | 0.296028026 |
| ENSGALG00010017532 | 0.900847571 | 0.327108413 |
| ENSGALG00010017533 | 0.886146647 | 0.334924261 |
| ENSGALG00010017534 | 0.987463717 | 0.307716323 |
| ENSGALG00010017535 | 0.942443396 | 0.287185742 |

|                    |             |             |
|--------------------|-------------|-------------|
| ENSGALG00010017536 | 0.7645122   | 0.376746963 |
| ENSGALG00010017537 | 0.988391075 | 0.390278549 |
| ENSGALG00010017538 | 0.770224489 | 0.335826592 |
| ENSGALG00010017539 | 0.975375697 | 0.389520399 |
| ENSGALG00010017540 | 0.881945221 | 0.270305056 |
| ENSGALG00010017541 | 0.540859642 | 0.067512567 |
| ENSGALG00010017542 | 0.313256264 | 0.147338485 |
| ENSGALG00010017543 | 0.920010441 | 0.363235224 |
| ENSGALG00010017544 | 0.804745589 | 0.120919707 |
| ENSGALG00010017545 | 0.718940668 | 0.402330466 |
| ENSGALG00010017546 | 0.941002634 | 0.217623859 |
| ENSGALG00010017547 | 0.882361879 | 0.368980041 |
| ENSGALG00010017548 | 0.169752046 | 0.126219749 |
| ENSGALG00010017549 | 0.332434862 | 0.054204961 |
| ENSGALG00010017550 | 0.954486898 | 0.326117061 |
| ENSGALG00010017551 | 0.864334385 | 0.303797641 |
| ENSGALG00010017552 | 0.808361024 | 0.102887278 |
| ENSGALG00010017553 | 0.06146493  | 0.374999601 |
| ENSGALG00010017554 | 0.369655128 | 0.212112174 |
| ENSGALG00010017555 | 0.470668626 | 0.116119829 |
| ENSGALG00010017556 | 0.925463288 | 0.30683162  |
| ENSGALG00010017557 | 0.486156032 | 0.502902749 |
| ENSGALG00010017558 | 0.924375083 | 0.307603072 |
| ENSGALG00010017559 | 0.983353172 | 0.348074999 |
| ENSGALG00010017560 | 0.277566769 | 0.107857127 |
| ENSGALG00010017561 | 0.196452115 | 0.112355381 |
| ENSGALG00010017562 | 0.996189462 | 0.310186957 |
| ENSGALG00010017563 | 0.947961111 | 0.372348767 |
| ENSGALG00010017564 | 0.312151319 | 0.076731353 |
| ENSGALG00010017565 | 0.51055728  | 0.036807648 |
| ENSGALG00010017566 | 0.316450358 | 0.016888961 |
| ENSGALG00010017567 | 0.305552509 | 0.401971759 |
| ENSGALG00010017568 | 0.769248451 | 0.031741061 |
| ENSGALG00010017569 | 0.977405413 | 0.343800106 |
| ENSGALG00010017570 | 0.730833363 | 0.470467396 |
| ENSGALG00010017571 | 0.815734775 | 0.37589541  |
| ENSGALG00010017574 | 0.843437324 | 0.278109773 |
| ENSGALG00010017575 | 0.959866851 | 0.379675375 |
| ENSGALG00010017576 | 0.797612198 | 0.224711986 |
| ENSGALG00010017577 | 0.610379889 | 0.117639447 |
| ENSGALG00010017578 | 0.256604077 | 0.185877882 |
| ENSGALG00010017579 | 0.082956089 | 0.268787459 |
| ENSGALG00010017580 | 0.673851262 | 0.151039346 |
| ENSGALG00010017581 | 0.124864647 | 0.503726515 |
| ENSGALG00010017582 | 0.830063771 | 0.422067235 |
| ENSGALG00010017583 | 0.987964714 | 0.310690937 |
| ENSGALG00010017584 | 0.251188285 | 0.370593425 |
| ENSGALG00010017585 | 0.209645075 | 0.079387343 |
| ENSGALG00010017586 | 0.818952833 | 0.079125175 |
| ENSGALG00010017587 | 0.500326277 | 0.118719631 |
| ENSGALG00010017588 | 0.177702564 | 0.102056874 |
| ENSGALG00010017589 | 0.923678718 | 0.302689953 |
| ENSGALG00010017590 | 0.9320803   | 0.374537971 |
| ENSGALG00010017591 | 0.738015915 | 0.309993219 |
| ENSGALG00010017592 | 0.955496133 | 0.289616351 |
| ENSGALG00010017593 | 0.490888943 | 0.132027086 |

|                    |             |             |
|--------------------|-------------|-------------|
| ENSGALG00010017594 | 0.977807369 | 0.30014963  |
| ENSGALG00010017595 | 0.584942172 | 0.21907936  |
| ENSGALG00010017596 | 0.410153591 | 0.162644608 |
| ENSGALG00010017597 | 0.476155535 | 0.119972006 |
| ENSGALG00010017598 | 0.97877649  | 0.275410789 |
| ENSGALG00010017599 | 0.443609446 | 0.319176828 |
| ENSGALG00010017600 | 0.657847451 | 0.000366782 |
| ENSGALG00010017601 | 0.07343421  | 0.303688964 |
| ENSGALG00010017603 | 0.993555847 | 0.298156806 |
| ENSGALG00010017604 | 0.119461082 | 0.256845134 |
| ENSGALG00010017605 | 0.964743161 | 0.265238776 |
| ENSGALG00010017606 | 0.586672304 | 0.355632903 |
| ENSGALG00010017608 | 0.686447291 | 0.103090082 |
| ENSGALG00010017609 | 0.135002105 | 0.165821506 |
| ENSGALG00010017610 | 0.951268182 | 0.364002319 |
| ENSGALG00010017612 | 0.372010435 | 0.244417323 |
| ENSGALG00010017613 | 0.551053246 | 0.220923917 |
| ENSGALG00010017615 | 0.926032072 | 0.364364068 |
| ENSGALG00010017616 | 0.894910847 | 0.162787842 |
| ENSGALG00010017618 | 0.069283666 | 0.12825803  |
| ENSGALG00010017619 | 0.364819035 | 0.215582163 |
| ENSGALG00010017620 | 0.16154644  | 0.317934481 |
| ENSGALG00010017621 | 0.9111046   | 0.208571619 |
| ENSGALG00010017622 | 0.864371979 | 0.255284398 |
| ENSGALG00010017625 | 0.98010268  | 0.356634968 |
| ENSGALG00010017626 | 0.926151468 | 0.265614393 |
| ENSGALG00010017627 | 0.505595959 | 0.101263738 |
| ENSGALG00010017628 | 0.16899017  | 0.508239365 |
| ENSGALG00010017629 | 0.363256288 | 0.165264164 |
| ENSGALG00010017631 | 0.654772561 | 0.108746545 |
| ENSGALG00010017632 | 0.991730375 | 0.34401906  |
| ENSGALG00010017633 | 0.129871437 | 0.301455538 |
| ENSGALG00010017634 | 0.121231418 | 0.176370819 |
| ENSGALG00010017635 | 0.396046331 | 0.44788194  |
| ENSGALG00010017636 | 0.892237293 | 0.35675527  |
| ENSGALG00010017638 | 0.93801436  | 0.227160718 |
| ENSGALG00010017639 | 0.351818796 | 0.001616153 |
| ENSGALG00010017640 | 0.989827525 | 0.312343638 |
| ENSGALG00010017641 | 0.993937239 | 0.323906452 |
| ENSGALG00010017642 | 0.731545932 | 0.256043163 |
| ENSGALG00010017643 | 0.99355848  | 0.346027778 |
| ENSGALG00010017644 | 0.573125576 | 0.036599395 |
| ENSGALG00010017645 | 0.987892017 | 0.254471689 |
| ENSGALG00010017646 | 0.947995982 | 0.315240826 |
| ENSGALG00010017647 | 0.183229953 | 0.146691036 |
| ENSGALG00010017648 | 0.715737409 | 0.210427132 |
| ENSGALG00010017649 | 0.973981932 | 0.315241818 |
| ENSGALG00010017650 | 0.594676391 | 0.150304719 |
| ENSGALG00010017651 | 0.214018368 | 0.023629893 |
| ENSGALG00010017652 | 0.967099594 | 0.275097119 |
| ENSGALG00010017653 | 0.993321841 | 0.296013394 |
| ENSGALG00010017654 | 0.939893315 | 0.371615373 |
| ENSGALG00010017655 | 0.621885786 | 0.215000514 |
| ENSGALG00010017656 | 0.996382906 | 0.310883926 |
| ENSGALG00010017657 | 0.236666115 | 0.042143743 |
| ENSGALG00010017658 | 0.970374548 | 0.20776701  |

|                    |             |             |
|--------------------|-------------|-------------|
| ENSGALG00010017659 | 0.768158649 | 0.441019428 |
| ENSGALG00010017660 | 0.983783987 | 0.357231177 |
| ENSGALG00010017661 | 0.975055306 | 0.33841853  |
| ENSGALG00010017662 | 0.82085348  | 0.223313622 |
| ENSGALG00010017663 | 0.733666795 | 0.207251035 |
| ENSGALG00010017664 | 0.738108516 | 0.014613334 |
| ENSGALG00010017665 | 0.555440424 | 0.069655178 |
| ENSGALG00010017666 | 0.285700292 | 0.244698352 |
| ENSGALG00010017667 | 0.473838036 | 0.229493872 |
| ENSGALG00010017668 | 0.892096036 | 0.124938431 |
| ENSGALG00010017669 | 0.105574677 | 0.008363559 |
| ENSGALG00010017670 | 0.868467338 | 0.529324481 |
| ENSGALG00010017671 | 0.936171351 | 0.396830061 |
| ENSGALG00010017672 | 0.876628112 | 0.292852835 |
| ENSGALG00010017673 | 0.874604752 | 0.228782299 |
| ENSGALG00010017675 | 0.667050995 | 0.011401403 |
| ENSGALG00010017676 | 0.70641826  | 0.25361323  |
| ENSGALG00010017677 | 0.30741302  | 0.088980984 |
| ENSGALG00010017678 | 0.672142782 | 0.044225528 |
| ENSGALG00010017679 | 0.872900737 | 0.185867582 |
| ENSGALG00010017681 | 0.963497125 | 0.327602155 |
| ENSGALG00010017682 | 0.978174908 | 0.344190085 |
| ENSGALG00010017683 | 0.882284099 | 0.383615075 |
| ENSGALG00010017684 | 0.311854309 | 0.205790051 |
| ENSGALG00010017685 | 0.980969535 | 0.332166566 |
| ENSGALG00010017687 | 0.079100666 | 0.203549952 |
| ENSGALG00010017688 | 0.770018161 | 0.496099514 |
| ENSGALG00010017689 | 0.949170662 | 0.320214842 |
| ENSGALG00010017690 | 0.780247114 | 0.343559501 |
| ENSGALG00010017691 | 0.770959069 | 0.103600326 |
| ENSGALG00010017692 | 0.992836161 | 0.355580693 |
| ENSGALG00010017693 | 0.404662227 | 0.076424184 |
| ENSGALG00010017694 | 0.77030865  | 0.361962652 |
| ENSGALG00010017695 | 0.975143144 | 0.336530737 |
| ENSGALG00010017696 | 0.1483747   | 0.34261117  |
| ENSGALG00010017697 | 0.672346161 | 0.305296586 |
| ENSGALG00010017698 | 0.075925671 | 0.020377447 |
| ENSGALG00010017699 | 0.801684879 | 0.235016801 |
| ENSGALG00010017700 | 0.754371995 | 0.272546827 |
| ENSGALG00010017701 | 0.726378168 | 0.086750139 |
| ENSGALG00010017703 | 0.623629889 | 0.069547698 |
| ENSGALG00010017704 | 0.973498166 | 0.337767021 |
| ENSGALG00010017705 | 0.970232472 | 0.286266491 |
| ENSGALG00010017706 | 0.940531159 | 0.33283339  |
| ENSGALG00010017707 | 0.653928752 | 0.188755228 |
| ENSGALG00010017708 | 0.976732901 | 0.372194776 |
| ENSGALG00010017710 | 0.928845806 | 0.282627162 |
| ENSGALG00010017711 | 0.859510024 | 0.201921907 |
| ENSGALG00010017712 | 0.486672478 | 0.311686208 |
| ENSGALG00010017713 | 0.988284422 | 0.33408437  |
| ENSGALG00010017714 | 0.799371941 | 0.070979863 |
| ENSGALG00010017715 | 0.984031383 | 0.32835311  |
| ENSGALG00010017716 | 0.189025428 | 0.100613405 |
| ENSGALG00010017717 | 0.94014372  | 0.324762733 |
| ENSGALG00010017718 | 0.831116507 | 0.201022045 |
| ENSGALG00010017720 | 0.208539525 | 0.33080183  |

|                    |             |             |
|--------------------|-------------|-------------|
| ENSGALG00010017721 | 0.589075306 | 0.337812509 |
| ENSGALG00010017723 | 0.248030557 | 0.190725343 |
| ENSGALG00010017724 | 0.995526131 | 0.327634681 |
| ENSGALG00010017725 | 0.963901833 | 0.251058182 |
| ENSGALG00010017726 | 0.19052018  | 0.544002549 |
| ENSGALG00010017727 | 0.737162158 | 0.3921208   |
| ENSGALG00010017729 | 0.985174787 | 0.347774593 |
| ENSGALG00010017730 | 0.946665662 | 0.283248778 |
| ENSGALG00010017732 | 0.42504936  | 0.00202996  |
| ENSGALG00010017733 | 0.629216187 | 0.073387933 |
| ENSGALG00010017734 | 0.667314387 | 0.353422577 |
| ENSGALG00010017735 | 0.789635514 | 0.060197048 |
| ENSGALG00010017737 | 0.734644493 | 0.123747816 |
| ENSGALG00010017738 | 0.961419408 | 0.338000147 |
| ENSGALG00010017739 | 0.845230291 | 0.285982447 |
| ENSGALG00010017740 | 0.491514942 | 0.166389109 |
| ENSGALG00010017741 | 0.910754557 | 0.27642688  |
| ENSGALG00010017742 | 0.880673863 | 0.469224717 |
| ENSGALG00010017744 | 0.734024949 | 0.380071325 |
| ENSGALG00010017745 | 0.980177192 | 0.317565303 |
| ENSGALG00010017746 | 0.959451802 | 0.316302844 |
| ENSGALG00010017747 | 0.970661996 | 0.325802577 |
| ENSGALG00010017748 | 0.134496827 | 0.181222575 |
| ENSGALG00010017749 | 0.141003976 | 0.019420038 |
| ENSGALG00010017750 | 0.264239718 | 0.073427965 |
| ENSGALG00010017751 | 0.90830789  | 0.268153719 |
| ENSGALG00010017752 | 0.944610834 | 0.352173878 |
| ENSGALG00010017753 | 0.100091479 | 0.026080987 |
| ENSGALG00010017754 | 0.94115821  | 0.257554318 |
| ENSGALG00010017755 | 0.231370633 | 0.493429574 |
| ENSGALG00010017756 | 0.607172897 | 0.324430856 |
| ENSGALG00010017757 | 0.994131567 | 0.332777038 |
| ENSGALG00010017758 | 0.026966462 | 0.158284821 |
| ENSGALG00010017759 | 0.86727575  | 0.213216753 |
| ENSGALG00010017760 | 0.978706612 | 0.331913357 |
| ENSGALG00010017761 | 0.409040733 | 0.029323072 |
| ENSGALG00010017762 | 0.743428999 | 0.275087934 |
| ENSGALG00010017763 | 0.509304147 | 0.440981467 |
| ENSGALG00010017764 | 0.879410865 | 0.525590733 |
| ENSGALG00010017765 | 0.715834777 | 0.206469747 |
| ENSGALG00010017766 | 0.983865088 | 0.279857101 |
| ENSGALG00010017767 | 0.694711639 | 0.106082651 |
| ENSGALG00010017768 | 0.933301348 | 0.439117408 |
| ENSGALG00010017769 | 0.653501435 | 0.335721438 |
| ENSGALG00010017770 | 0.373060534 | 0.068156341 |
| ENSGALG00010017771 | 0.938809313 | 0.317643163 |
| ENSGALG00010017772 | 0.981963821 | 0.368105402 |
| ENSGALG00010017773 | 0.604597607 | 0.038385673 |
| ENSGALG00010017774 | 0.877287953 | 0.212081489 |
| ENSGALG00010017775 | 0.132679179 | 0.228599164 |
| ENSGALG00010017776 | 0.81552272  | 0.376019465 |
| ENSGALG00010017777 | 0.428366052 | 0.503171251 |
| ENSGALG00010017778 | 0.983551705 | 0.306871736 |
| ENSGALG00010017779 | 0.943364749 | 0.286469065 |
| ENSGALG00010017780 | 0.591540172 | 0.263878366 |
| ENSGALG00010017781 | 0.286891908 | 0.113554265 |

|                    |             |             |
|--------------------|-------------|-------------|
| ENSGALG00010017782 | 0.975372994 | 0.331600997 |
| ENSGALG00010017783 | 0.781312459 | 0.203920658 |
| ENSGALG00010017784 | 0.775673867 | 0.08386867  |
| ENSGALG00010017785 | 0.525456912 | 0.378156691 |
| ENSGALG00010017786 | 0.961522855 | 0.3715569   |
| ENSGALG00010017787 | 0.795133985 | 0.062716539 |
| ENSGALG00010017788 | 0.211022858 | 0.278044165 |
| ENSGALG00010017789 | 0.967987222 | 0.32032632  |
| ENSGALG00010017790 | 0.74810742  | 0.3360599   |
| ENSGALG00010017791 | 0.971158416 | 0.369599161 |
| ENSGALG00010017792 | 0.930582103 | 0.34169405  |
| ENSGALG00010017793 | 0.780399978 | 0.309977525 |
| ENSGALG00010017794 | 0.394927857 | 0.119113854 |
| ENSGALG00010017795 | 0.976644091 | 0.319370549 |
| ENSGALG00010017796 | 0.035668542 | 0.049867246 |
| ENSGALG00010017797 | 0.943235521 | 0.371541481 |
| ENSGALG00010017798 | 0.90214524  | 0.28021892  |
| ENSGALG00010017799 | 0.858859777 | 0.168717967 |
| ENSGALG00010017800 | 0.674225094 | 0.255502056 |
| ENSGALG00010017801 | 0.656248875 | 0.184801821 |
| ENSGALG00010017802 | 0.547547761 | 0.182574154 |
| ENSGALG00010017803 | 0.051359204 | 0.091655989 |
| ENSGALG00010017804 | 0.833364259 | 0.199679938 |
| ENSGALG00010017805 | 0.973407529 | 0.253664268 |
| ENSGALG00010017806 | 0.614218282 | 0.285501484 |
| ENSGALG00010017807 | 0.990523899 | 0.32062728  |
| ENSGALG00010017808 | 0.965277612 | 0.330167065 |
| ENSGALG00010017809 | 0.705651906 | 0.253037802 |
| ENSGALG00010017810 | 0.949188944 | 0.300928912 |
| ENSGALG00010017811 | 0.960210235 | 0.341618737 |
| ENSGALG00010017812 | 0.592280479 | 0.161656445 |
| ENSGALG00010017813 | 0.785461042 | 0.384477121 |
| ENSGALG00010017814 | 0.949353222 | 0.405179177 |
| ENSGALG00010017815 | 0.682175885 | 0.350774704 |
| ENSGALG00010017816 | 0.136717886 | 0.060412273 |
| ENSGALG00010017817 | 0.990889918 | 0.328149777 |
| ENSGALG00010017818 | 0.672913425 | 0.299101007 |
| ENSGALG00010017819 | 0.564443915 | 0.089936092 |
| ENSGALG00010017820 | 0.965876515 | 0.340510367 |
| ENSGALG00010017821 | 0.234217401 | 0.153493537 |
| ENSGALG00010017822 | 0.02254112  | 0.295702002 |
| ENSGALG00010017823 | 0.886630636 | 0.350808351 |
| ENSGALG00010017824 | 0.770731764 | 0.560557227 |
| ENSGALG00010017825 | 0.670107282 | 0.404990075 |
| ENSGALG00010017826 | 0.998035976 | 0.353543851 |
| ENSGALG00010017827 | 0.388459236 | 0.25023441  |
| ENSGALG00010017828 | 0.053619445 | 0.019509842 |
| ENSGALG00010017830 | 0.248600584 | 0.018740054 |
| ENSGALG00010017831 | 0.959620773 | 0.354610081 |
| ENSGALG00010017832 | 0.322502828 | 0.568703667 |
| ENSGALG00010017833 | 0.177462875 | 0.066943453 |
| ENSGALG00010017834 | 0.500023784 | 0.496886448 |
| ENSGALG00010017835 | 0.260616931 | 0.093722119 |
| ENSGALG00010017836 | 0.193841428 | 0.299238428 |
| ENSGALG00010017837 | 0.28880012  | 0.418789177 |
| ENSGALG00010017838 | 0.960526294 | 0.450910384 |



|                    |             |             |
|--------------------|-------------|-------------|
| ENSGALG00010017839 | 0.541377515 | 0.003194044 |
| ENSGALG00010017840 | 0.04515196  | 0.174262167 |
| ENSGALG00010017841 | 0.863413924 | 0.343971537 |
| ENSGALG00010017842 | 0.45915399  | 0.156003325 |
| ENSGALG00010017843 | 0.932332695 | 0.403419582 |
| ENSGALG00010017844 | 0.010676477 | 0.136800314 |
| ENSGALG00010017846 | 0.018411501 | 0.102218592 |
| ENSGALG00010017847 | 0.508027854 | 0.357448149 |
| ENSGALG00010017848 | 0.895721992 | 0.245414134 |
| ENSGALG00010017849 | 0.663072481 | 0.111988127 |
| ENSGALG00010017850 | 0.734975559 | 0.403772651 |
| ENSGALG00010017851 | 0.250541966 | 0.050696871 |
| ENSGALG00010017852 | 0.007193065 | 0.068657475 |
| ENSGALG00010017853 | 0.55985554  | 0.358394578 |
| ENSGALG00010017854 | 0.565474246 | 0.223228225 |
| ENSGALG00010017855 | 0.231410825 | 0.361724914 |
| ENSGALG00010017856 | 0.787754325 | 0.143636812 |
| ENSGALG00010017857 | 0.803453562 | 0.251332955 |
| ENSGALG00010017858 | 0.964876794 | 0.387955554 |
| ENSGALG00010017859 | 0.941632292 | 0.230361993 |
| ENSGALG00010017860 | 0.192755438 | 0.295097319 |
| ENSGALG00010017861 | 0.589691259 | 0.053022113 |
| ENSGALG00010017862 | 0.663188297 | 0.043013948 |
| ENSGALG00010017863 | 0.572708465 | 0.188772026 |
| ENSGALG00010017864 | 0.752409906 | 0.268174788 |
| ENSGALG00010017865 | 0.842961599 | 0.228477773 |
| ENSGALG00010017866 | 0.460563159 | 0.147833835 |
| ENSGALG00010017867 | 0.751399383 | 0.126544029 |
| ENSGALG00010017868 | 0.978354966 | 0.283449831 |
| ENSGALG00010017869 | 0.553339965 | 0.193914998 |
| ENSGALG00010017870 | 0.851825683 | 0.059441769 |
| ENSGALG00010017871 | 0.714171842 | 0.138525092 |
| ENSGALG00010017872 | 0.784013297 | 0.30918584  |
| ENSGALG00010017873 | 0.962832207 | 0.394264009 |
| ENSGALG00010017874 | 0.889150124 | 0.204728432 |
| ENSGALG00010017875 | 0.011061717 | 0.17509238  |
| ENSGALG00010017876 | 0.889964588 | 0.328599285 |
| ENSGALG00010017877 | 0.570588423 | 0.222050898 |
| ENSGALG00010017878 | 0.908105351 | 0.2738189   |
| ENSGALG00010017879 | 0.207215102 | 0.157405026 |
| ENSGALG00010017880 | 0.909598981 | 0.31246621  |
| ENSGALG00010017881 | 0.907337194 | 0.312455187 |
| ENSGALG00010017882 | 0.905925696 | 0.372467326 |
| ENSGALG00010017883 | 0.572186061 | 0.171354425 |
| ENSGALG00010017884 | 0.690321685 | 0.269795861 |
| ENSGALG00010017885 | 0.678529666 | 0.077889295 |
| ENSGALG00010017886 | 0.891939137 | 0.260952521 |
| ENSGALG00010017887 | 0.927520956 | 0.368327407 |
| ENSGALG00010017888 | 0.658564382 | 0.425846059 |
| ENSGALG00010017889 | 0.189816433 | 0.25584371  |
| ENSGALG00010017890 | 0.67816757  | 0.273763697 |
| ENSGALG00010017891 | 0.993678842 | 0.316676665 |
| ENSGALG00010017894 | 0.802221872 | 0.260546254 |
| ENSGALG00010017895 | 0.783400801 | 0.16204469  |
| ENSGALG00010017898 | 0.952912981 | 0.256898683 |
| ENSGALG00010017901 | 0.131629194 | 0.118217065 |

|                    |             |             |
|--------------------|-------------|-------------|
| ENSGALG00010017902 | 0.405924564 | 0.006458455 |
| ENSGALG00010017903 | 0.430265427 | 0.126239061 |
| ENSGALG00010017904 | 0.369389236 | 0.349340578 |
| ENSGALG00010017905 | 0.928020344 | 0.307971764 |
| ENSGALG00010017906 | 0.557172774 | 0.010679925 |
| ENSGALG00010017908 | 0.927681218 | 0.245247546 |
| ENSGALG00010017909 | 0.734873293 | 0.254438086 |
| ENSGALG00010017911 | 0.127903215 | 0.166108816 |
| ENSGALG00010017913 | 0.838137049 | 0.23303016  |
| ENSGALG00010017915 | 0.759464361 | 0.400873747 |
| ENSGALG00010017917 | 0.787392311 | 0.40979765  |
| ENSGALG00010017918 | 0.836491628 | 0.116927936 |
| ENSGALG00010017920 | 0.940767713 | 0.316171432 |
| ENSGALG00010017921 | 0.172797959 | 0.256003108 |
| ENSGALG00010017922 | 0.979617243 | 0.279895483 |
| ENSGALG00010017924 | 0.270451009 | 0.090541667 |
| ENSGALG00010017927 | 0.054964012 | 0.205318313 |
| ENSGALG00010017930 | 0.797208695 | 0.298582956 |
| ENSGALG00010017931 | 0.052838346 | 0.100637787 |
| ENSGALG00010017932 | 0.3619239   | 0.131870846 |
| ENSGALG00010017933 | 0.979618755 | 0.327121818 |
| ENSGALG00010017936 | 0.488428693 | 0.127907235 |
| ENSGALG00010017937 | 0.908787673 | 0.401609348 |
| ENSGALG00010017938 | 0.555100443 | 0.072140719 |
| ENSGALG00010017939 | 0.152614871 | 0.489874215 |
| ENSGALG00010017940 | 0.975092723 | 0.237275857 |
| ENSGALG00010017941 | 0.01758475  | 0.114985429 |
| ENSGALG00010017942 | 0.04000971  | 0.185397503 |
| ENSGALG00010017943 | 0.838117914 | 0.18295197  |
| ENSGALG00010017944 | 0.194426889 | 0.183420005 |
| ENSGALG00010017945 | 0.067800255 | 0.408748399 |
| ENSGALG00010017946 | 0.716379133 | 0.453014838 |
| ENSGALG00010017948 | 0.62235469  | 0.292489823 |
| ENSGALG00010017949 | 0.983266007 | 0.30396545  |
| ENSGALG00010017950 | 0.709546166 | 0.335802311 |
| ENSGALG00010017951 | 0.271052982 | 0.134649085 |
| ENSGALG00010017952 | 0.670270691 | 0.310508581 |
| ENSGALG00010017954 | 0.848888375 | 0.306182243 |
| ENSGALG00010017955 | 0.530490574 | 0.017921516 |
| ENSGALG00010017956 | 0.54776638  | 0.027258934 |
| ENSGALG00010017957 | 0.973797325 | 0.332361911 |
| ENSGALG00010017958 | 0.207828297 | 0.108328404 |
| ENSGALG00010017959 | 0.928169313 | 0.224797962 |
| ENSGALG00010017962 | 0.89533856  | 0.149559003 |
| ENSGALG00010017963 | 0.644046366 | 0.219624887 |
| ENSGALG00010017964 | 0.552711739 | 0.006521871 |
| ENSGALG00010017967 | 0.94972925  | 0.396086587 |
| ENSGALG00010017968 | 0.308758304 | 0.100827364 |
| ENSGALG00010017970 | 0.003044037 | 0.055935543 |
| ENSGALG00010017972 | 0.844489632 | 0.119761656 |
| ENSGALG00010017973 | 0.491137744 | 0.013775933 |
| ENSGALG00010017974 | 0.887484114 | 0.437121222 |
| ENSGALG00010017975 | 0.277566769 | 0.107857127 |
| ENSGALG00010017976 | 0.349606711 | 0.249319179 |
| ENSGALG00010017977 | 0.165954831 | 0.243506135 |
| ENSGALG00010017978 | 0.054846918 | 0.196234361 |

|                    |             |             |
|--------------------|-------------|-------------|
| ENSGALG00010017979 | 0.758592122 | 0.026540677 |
| ENSGALG00010017980 | 0.680588875 | 0.281707244 |
| ENSGALG00010017981 | 0.803854741 | 0.23175255  |
| ENSGALG00010017982 | 0.122838001 | 0.173682415 |
| ENSGALG00010017983 | 0.564868986 | 0.393248003 |
| ENSGALG00010017985 | 0.794459582 | 0.416281347 |
| ENSGALG00010017986 | 0.31143421  | 0.181196866 |
| ENSGALG00010017987 | 0.871256383 | 0.47957794  |
| ENSGALG00010017990 | 0.433273665 | 0.432412529 |
| ENSGALG00010017991 | 0.942702706 | 0.3656959   |
| ENSGALG00010017992 | 0.539961739 | 0.103166807 |
| ENSGALG00010017993 | 0.889234497 | 0.428845755 |
| ENSGALG00010017994 | 0.500566545 | 0.203434961 |
| ENSGALG00010017995 | 0.676881798 | 0.23471744  |
| ENSGALG00010017996 | 0.867808323 | 0.239977179 |
| ENSGALG00010017997 | 0.041837841 | 0.076085566 |
| ENSGALG00010017998 | 0.367818795 | 0.105765563 |
| ENSGALG00010017999 | 0.965561326 | 0.261428074 |
| ENSGALG00010018000 | 0.96518015  | 0.306417171 |
| ENSGALG00010018001 | 0.047567746 | 0.06079998  |
| ENSGALG00010018002 | 0.906924705 | 0.248457894 |
| ENSGALG00010018003 | 0.702196713 | 0.004294275 |
| ENSGALG00010018004 | 0.055893501 | 0.041576028 |
| ENSGALG00010018005 | 0.049999924 | 0.07065685  |
| ENSGALG00010018006 | 0.896773104 | 0.280418177 |
| ENSGALG00010018007 | 0.715815088 | 0.233986813 |
| ENSGALG00010018008 | 0.995053269 | 0.339438169 |
| ENSGALG00010018009 | 0.950941439 | 0.335112368 |
| ENSGALG00010018010 | 0.971852208 | 0.388900615 |
| ENSGALG00010018011 | 0.981843532 | 0.27425119  |
| ENSGALG00010018012 | 0.983557332 | 0.303605035 |
| ENSGALG00010018013 | 0.853827164 | 0.18424478  |
| ENSGALG00010018014 | 0.680133411 | 0.323884306 |
| ENSGALG00010018015 | 0.189826181 | 0.004568278 |
| ENSGALG00010018016 | 0.910814891 | 0.388227881 |
| ENSGALG00010018017 | 0.576346197 | 0.304512843 |
| ENSGALG00010018018 | 0.903236495 | 0.141533873 |
| ENSGALG00010018019 | 0.861761451 | 0.170560248 |
| ENSGALG00010018020 | 0.301625718 | 0.111908818 |
| ENSGALG00010018021 | 0.91785779  | 0.376411869 |
| ENSGALG00010018022 | 0.968003434 | 0.317024338 |
| ENSGALG00010018023 | 0.936036252 | 0.312922821 |
| ENSGALG00010018024 | 0.126855773 | 0.139884367 |
| ENSGALG00010018025 | 0.978280159 | 0.228431217 |
| ENSGALG00010018026 | 0.479701227 | 0.391334908 |
| ENSGALG00010018027 | 0.826967329 | 0.202897954 |
| ENSGALG00010018028 | 0.461383739 | 0.199272115 |
| ENSGALG00010018029 | 0.000888923 | 0.059466089 |
| ENSGALG00010018030 | 0.868101025 | 0.319039733 |
| ENSGALG00010018031 | 0.557006097 | 0.154178119 |
| ENSGALG00010018032 | 0.891914502 | 0.339515046 |
| ENSGALG00010018033 | 0.951016777 | 0.278848127 |
| ENSGALG00010018034 | 0.597106113 | 0.319046609 |
| ENSGALG00010018035 | 0.914623439 | 0.263954061 |
| ENSGALG00010018036 | 0.866113602 | 0.340118639 |
| ENSGALG00010018037 | 0.825011149 | 0.234491925 |

|                    |             |             |
|--------------------|-------------|-------------|
| ENSGALG00010018038 | 0.367717776 | 0.130093535 |
| ENSGALG00010018039 | 0.76605016  | 0.51463475  |
| ENSGALG00010018042 | 0.797799184 | 0.189115692 |
| ENSGALG00010018043 | 0.909530183 | 0.391285324 |
| ENSGALG00010018044 | 0.714139541 | 0.350998402 |
| ENSGALG00010018045 | 0.912369376 | 0.343094789 |
| ENSGALG00010018046 | 0.886784978 | 0.208995525 |
| ENSGALG00010018048 | 0.426505629 | 0.235093301 |
| ENSGALG00010018049 | 0.958655457 | 0.347578062 |
| ENSGALG00010018051 | 0.971204207 | 0.299609335 |
| ENSGALG00010018052 | 0.665037995 | 0.402793431 |
| ENSGALG00010018053 | 0.941455091 | 0.337795607 |
| ENSGALG00010018054 | 0.56213197  | 0.447135922 |
| ENSGALG00010018055 | 0.425484694 | 0.099613236 |
| ENSGALG00010018057 | 0.842049611 | 0.172096598 |
| ENSGALG00010018058 | 0.791917641 | 0.17411745  |
| ENSGALG00010018059 | 0.316699311 | 0.214961316 |
| ENSGALG00010018060 | 0.500875013 | 0.18230077  |
| ENSGALG00010018061 | 0.826778382 | 0.325563975 |
| ENSGALG00010018062 | 0.967562358 | 0.363988831 |
| ENSGALG00010018063 | 0.921613585 | 0.28169475  |
| ENSGALG00010018064 | 0.8898593   | 0.323011824 |
| ENSGALG00010018065 | 0.36254603  | 0.12261176  |
| ENSGALG00010018066 | 0.601925518 | 0.054566628 |
| ENSGALG00010018067 | 0.863683069 | 0.120874259 |
| ENSGALG00010018068 | 0.152896559 | 0.248771144 |
| ENSGALG00010018069 | 0.754308668 | 0.071150062 |
| ENSGALG00010018070 | 0.422683229 | 0.240384059 |
| ENSGALG00010018071 | 0.535267994 | 0.367698726 |
| ENSGALG00010018072 | 0.209270226 | 0.319472177 |
| ENSGALG00010018073 | 0.764005397 | 0.324506798 |
| ENSGALG00010018075 | 0.944762985 | 0.306764033 |
| ENSGALG00010018076 | 0.996640814 | 0.336776725 |
| ENSGALG00010018078 | 0.898686936 | 0.454886174 |
| ENSGALG00010018080 | 0.910213072 | 0.252958832 |
| ENSGALG00010018081 | 0.773814269 | 0.143874908 |
| ENSGALG00010018082 | 0.822130492 | 0.16718836  |
| ENSGALG00010018083 | 0.273159857 | 0.750342917 |
| ENSGALG00010018085 | 0.966032936 | 0.26884337  |
| ENSGALG00010018086 | 0.393756035 | 0.130583636 |
| ENSGALG00010018087 | 0.847881914 | 0.435314291 |
| ENSGALG00010018089 | 0.59869031  | 0.179321018 |
| ENSGALG00010018090 | 0.285272007 | 0.109169955 |
| ENSGALG00010018092 | 0.804918359 | 0.40534144  |
| ENSGALG00010018095 | 0.782688222 | 0.142087971 |
| ENSGALG00010018098 | 0.027666716 | 0.187870113 |
| ENSGALG00010018099 | 0.901038158 | 0.332053503 |
| ENSGALG00010018101 | 0.284227058 | 0.103920777 |
| ENSGALG00010018102 | 0.939677628 | 0.28663351  |
| ENSGALG00010018103 | 0.120313157 | 0.054763501 |
| ENSGALG00010018105 | 0.265977428 | 0.217865653 |
| ENSGALG00010018108 | 0.971259959 | 0.359426983 |
| ENSGALG00010018109 | 0.637417611 | 0.297829976 |
| ENSGALG00010018110 | 0.54882741  | 0.203422153 |
| ENSGALG00010018112 | 0.622792236 | 0.314178094 |
| ENSGALG00010018114 | 0.933528517 | 0.44791585  |

|                    |             |             |
|--------------------|-------------|-------------|
| ENSGALG00010018115 | 0.965678642 | 0.2649282   |
| ENSGALG00010018118 | 0.13021111  | 0.300852233 |
| ENSGALG00010018119 | 0.557422601 | 0.461361938 |
| ENSGALG00010018120 | 0.318427197 | 0.195947252 |
| ENSGALG00010018121 | 0.741657068 | 0.193495781 |
| ENSGALG00010018122 | 0.254040886 | 0.265753446 |
| ENSGALG00010018123 | 0.985752236 | 0.323779362 |
| ENSGALG00010018124 | 0.333180514 | 0.13683277  |
| ENSGALG00010018126 | 0.159731047 | 0.165430564 |
| ENSGALG00010018127 | 0.080384603 | 0.080231585 |
| ENSGALG00010018128 | 0.872096024 | 0.472434795 |
| ENSGALG00010018129 | 0.378986826 | 0.110289096 |
| ENSGALG00010018131 | 0.899376285 | 0.320784544 |
| ENSGALG00010018132 | 0.400215036 | 0.132215663 |
| ENSGALG00010018133 | 0.469113109 | 0.11455071  |
| ENSGALG00010018136 | 0.368635925 | 0.132759256 |
| ENSGALG00010018137 | 0.977461642 | 0.335597902 |
| ENSGALG00010018138 | 0.032840259 | 0.449987318 |
| ENSGALG00010018139 | 0.98141951  | 0.337260117 |
| ENSGALG00010018140 | 0.448811626 | 0.193613413 |
| ENSGALG00010018141 | 0.955446526 | 0.340408681 |
| ENSGALG00010018142 | 0.958417015 | 0.2760092   |
| ENSGALG00010018143 | 0.8583868   | 0.240095091 |
| ENSGALG00010018145 | 0.236959829 | 0.160727502 |
| ENSGALG00010018147 | 0.165167041 | 0.158354236 |
| ENSGALG00010018148 | 0.156888767 | 0.061708278 |
| ENSGALG00010018149 | 0.983060717 | 0.330897118 |
| ENSGALG00010018150 | 0.843298153 | 0.054272914 |
| ENSGALG00010018152 | 0.462916886 | 0.275660467 |
| ENSGALG00010018153 | 0.433535616 | 0.10403681  |
| ENSGALG00010018154 | 0.983208029 | 0.308642556 |
| ENSGALG00010018155 | 0.465740677 | 0.770245842 |
| ENSGALG00010018156 | 0.660016214 | 0.044794608 |
| ENSGALG00010018157 | 0.78391554  | 0.315879361 |
| ENSGALG00010018158 | 0.175739858 | 0.298352128 |
| ENSGALG00010018160 | 0.845474192 | 0.439083788 |
| ENSGALG00010018162 | 0.970945712 | 0.406606663 |
| ENSGALG00010018163 | 0.728071235 | 0.165345872 |
| ENSGALG00010018165 | 0.923482348 | 0.256736976 |
| ENSGALG00010018166 | 0.991494632 | 0.343572151 |
| ENSGALG00010018168 | 0.351542667 | 0.070035234 |
| ENSGALG00010018169 | 0.578677792 | 0.178011943 |
| ENSGALG00010018170 | 0.962906973 | 0.200663615 |
| ENSGALG00010018171 | 0.085497629 | 0.146819802 |
| ENSGALG00010018172 | 0.573647885 | 0.320234974 |
| ENSGALG00010018173 | 0.609584644 | 0.299505944 |
| ENSGALG00010018174 | 0.308050833 | 0.289148505 |
| ENSGALG00010018175 | 0.2722955   | 0.398974216 |
| ENSGALG00010018176 | 0.585131647 | 0.678573333 |
| ENSGALG00010018177 | 0.891497909 | 0.085170109 |
| ENSGALG00010018179 | 0.747413471 | 0.26303761  |
| ENSGALG00010018181 | 0.267456708 | 0.077408342 |
| ENSGALG00010018183 | 0.853266223 | 0.124055687 |
| ENSGALG00010018185 | 0.952215056 | 0.20844782  |
| ENSGALG00010018186 | 0.353657346 | 0.311005176 |
| ENSGALG00010018187 | 0.285272007 | 0.109169955 |

|                    |             |             |
|--------------------|-------------|-------------|
| ENSGALG00010018188 | 0.9116409   | 0.332550607 |
| ENSGALG00010018189 | 0.435052461 | 0.525352419 |
| ENSGALG00010018190 | 0.706192791 | 0.399562171 |
| ENSGALG00010018192 | 0.793095863 | 0.015778074 |
| ENSGALG00010018193 | 0.948915742 | 0.347495662 |
| ENSGALG00010018194 | 0.576378169 | 0.285692827 |
| ENSGALG00010018197 | 0.149727174 | 0.352546499 |
| ENSGALG00010018198 | 0.898773448 | 0.255645635 |
| ENSGALG00010018199 | 0.463446747 | 0.317166694 |
| ENSGALG00010018200 | 0.607422279 | 0.494353532 |
| ENSGALG00010018202 | 0.420966174 | 0.396635401 |
| ENSGALG00010018203 | 0.783041095 | 0.300094701 |
| ENSGALG00010018205 | 0.825007148 | 0.368713724 |
| ENSGALG00010018206 | 0.590245529 | 0.04409343  |
| ENSGALG00010018208 | 0.401138341 | 0.518829888 |
| ENSGALG00010018209 | 0.034906606 | 0.287651478 |
| ENSGALG00010018212 | 0.618937223 | 0.039431781 |
| ENSGALG00010018213 | 0.152476645 | 0.19105403  |
| ENSGALG00010018215 | 0.96582613  | 0.295467289 |
| ENSGALG00010018216 | 0.586724787 | 0.61968082  |
| ENSGALG00010018217 | 0.154332453 | 0.156853136 |
| ENSGALG00010018219 | 0.391902249 | 0.004503542 |
| ENSGALG00010018221 | 0.024966345 | 0.138378133 |
| ENSGALG00010018224 | 0.45704954  | 0.358567505 |
| ENSGALG00010018225 | 0.059539862 | 0.180376229 |
| ENSGALG00010018226 | 0.173201081 | 0.002098709 |
| ENSGALG00010018227 | 0.686592638 | 0.478898406 |
| ENSGALG00010018229 | 0.929505117 | 0.336220861 |
| ENSGALG00010018231 | 0.262108355 | 0.189503318 |
| ENSGALG00010018232 | 0.388181886 | 0.168275567 |
| ENSGALG00010018233 | 0.962336395 | 0.266735184 |
| ENSGALG00010018236 | 0.869888561 | 0.127993862 |
| ENSGALG00010018237 | 0.033499114 | 0.176182674 |
| ENSGALG00010018240 | 0.813832549 | 0.07486169  |
| ENSGALG00010018241 | 0.044910983 | 0.476980333 |
| ENSGALG00010018244 | 0.809473505 | 0.199682991 |
| ENSGALG00010018247 | 0.619296958 | 0.134826483 |
| ENSGALG00010018248 | 0.310184688 | 0.17631624  |
| ENSGALG00010018250 | 0.282976025 | 0.145658897 |
| ENSGALG00010018251 | 0.864417713 | 0.306814343 |
| ENSGALG00010018252 | 0.59008763  | 0.190354068 |
| ENSGALG00010018254 | 0.609424461 | 0.258284295 |
| ENSGALG00010018255 | 0.824554521 | 0.227901838 |
| ENSGALG00010018258 | 0.1178595   | 0.237221595 |
| ENSGALG00010018259 | 0.547764701 | 0.165515542 |
| ENSGALG00010018260 | 0.84924653  | 0.287138949 |
| ENSGALG00010018261 | 0.762315461 | 0.332134517 |
| ENSGALG00010018262 | 0.528128989 | 0.195214608 |
| ENSGALG00010018263 | 0.640091324 | 0.524642395 |
| ENSGALG00010018264 | 0.823218128 | 0.32011759  |
| ENSGALG00010018265 | 0.562762353 | 0.187451176 |
| ENSGALG00010018267 | 0.908014351 | 0.212716389 |
| ENSGALG00010018268 | 0.672098666 | 0.205481243 |
| ENSGALG00010018270 | 0.602383798 | 0.09281779  |
| ENSGALG00010018274 | 0.839008211 | 0.12756403  |
| ENSGALG00010018275 | 0.921797909 | 0.247732813 |

|                    |             |             |
|--------------------|-------------|-------------|
| ENSGALG00010018276 | 0.817281129 | 0.179613976 |
| ENSGALG00010018277 | 0.576003696 | 0.238182964 |
| ENSGALG00010018278 | 0.501834662 | 0.622256436 |
| ENSGALG00010018281 | 0.480409836 | 0.168729102 |
| ENSGALG00010018282 | 0.436826324 | 0.193864427 |
| ENSGALG00010018283 | 0.432298881 | 0.223631983 |
| ENSGALG00010018284 | 0.983436508 | 0.320380473 |
| ENSGALG00010018285 | 0.205300762 | 0.057100233 |
| ENSGALG00010018287 | 0.881541768 | 0.367611292 |
| ENSGALG00010018288 | 0.830489702 | 0.304164334 |
| ENSGALG00010018289 | 0.81628082  | 0.25705247  |
| ENSGALG00010018290 | 0.84754241  | 0.355573821 |
| ENSGALG00010018291 | 0.817911521 | 0.16956202  |
| ENSGALG00010018292 | 0.111439996 | 0.148089802 |
| ENSGALG00010018294 | 0.97758636  | 0.285124658 |
| ENSGALG00010018295 | 0.203991683 | 0.058221925 |
| ENSGALG00010018296 | 0.226449844 | 0.298525499 |
| ENSGALG00010018298 | 0.931762003 | 0.323065633 |
| ENSGALG00010018299 | 0.92376294  | 0.276092399 |
| ENSGALG00010018300 | 0.270451009 | 0.090541667 |
| ENSGALG00010018301 | 0.496101277 | 0.045103494 |
| ENSGALG00010018302 | 0.037592416 | 0.268579382 |
| ENSGALG00010018304 | 0.177011403 | 0.149495548 |
| ENSGALG00010018305 | 0.076101516 | 0.165144032 |
| ENSGALG00010018306 | 0.997207517 | 0.337643545 |
| ENSGALG00010018307 | 0.163720607 | 0.08610252  |
| ENSGALG00010018308 | 0.036967671 | 0.099576166 |
| ENSGALG00010018309 | 0.879462496 | 0.391648335 |
| ENSGALG00010018310 | 0.94898744  | 0.393812569 |
| ENSGALG00010018311 | 0.220351476 | 0.25023501  |
| ENSGALG00010018312 | 0.892606361 | 0.431115585 |
| ENSGALG00010018313 | 0.694082327 | 0.359131411 |
| ENSGALG00010018314 | 0.548199788 | 0.243903107 |
| ENSGALG00010018315 | 0.663567949 | 0.288718694 |
| ENSGALG00010018317 | 0.86288867  | 0.174847429 |
| ENSGALG00010018319 | 0.950715772 | 0.29153987  |
| ENSGALG00010018321 | 0.147443429 | 0.191673149 |
| ENSGALG00010018322 | 0.997178838 | 0.333586913 |
| ENSGALG00010018323 | 0.827643811 | 0.333776522 |
| ENSGALG00010018324 | 0.657003213 | 0.223749926 |
| ENSGALG00010018325 | 0.985946109 | 0.237286234 |
| ENSGALG00010018326 | 0.707341106 | 0.286910435 |
| ENSGALG00010018327 | 0.565636165 | 0.133725131 |
| ENSGALG00010018328 | 0.790654137 | 0.299822009 |
| ENSGALG00010018329 | 0.896816293 | 0.144582944 |
| ENSGALG00010018330 | 0.240323044 | 0.14483563  |
| ENSGALG00010018331 | 0.936190426 | 0.335673563 |
| ENSGALG00010018332 | 0.905658791 | 0.317448214 |
| ENSGALG00010018333 | 0.943350006 | 0.288275918 |
| ENSGALG00010018334 | 0.550037248 | 0.252762033 |
| ENSGALG00010018335 | 0.285272007 | 0.109169955 |
| ENSGALG00010018336 | 0.949673181 | 0.387442161 |
| ENSGALG00010018337 | 0.431166402 | 0.296849804 |
| ENSGALG00010018338 | 0.673951038 | 0.225992024 |
| ENSGALG00010018339 | 0.936772822 | 0.224014801 |
| ENSGALG00010018340 | 0.998162697 | 0.338390868 |

|                    |             |             |
|--------------------|-------------|-------------|
| ENSGALG00010018342 | 0.957162826 | 0.373118749 |
| ENSGALG00010018344 | 0.868577795 | 0.288954074 |
| ENSGALG00010018345 | 0.86383788  | 0.302653775 |
| ENSGALG00010018346 | 0.751442841 | 0.111711154 |
| ENSGALG00010018347 | 0.509102951 | 0.346877213 |
| ENSGALG00010018348 | 0.248829363 | 0.260345702 |
| ENSGALG00010018349 | 0.856186704 | 0.444122562 |
| ENSGALG00010018350 | 0.64114195  | 0.292099903 |
| ENSGALG00010018351 | 0.564518001 | 0.169223913 |
| ENSGALG00010018352 | 0.94508962  | 0.244068558 |
| ENSGALG00010018353 | 0.917764524 | 0.410942924 |
| ENSGALG00010018354 | 0.860642904 | 0.286197711 |
| ENSGALG00010018355 | 0.947526041 | 0.32671705  |
| ENSGALG00010018356 | 0.399244056 | 0.168787816 |
| ENSGALG00010018357 | 0.974260892 | 0.374058907 |
| ENSGALG00010018358 | 0.795869934 | 0.228743742 |
| ENSGALG00010018359 | 0.048522101 | 0.113076891 |
| ENSGALG00010018360 | 0.657242799 | 0.371004524 |
| ENSGALG00010018361 | 0.841534077 | 0.3979628   |
| ENSGALG00010018363 | 0.940267433 | 0.430018629 |
| ENSGALG00010018364 | 0.422425593 | 0.109687795 |
| ENSGALG00010018365 | 0.276160635 | 0.065765646 |
| ENSGALG00010018366 | 0.345783546 | 0.016904492 |
| ENSGALG00010018367 | 0.873565041 | 0.523649649 |
| ENSGALG00010018368 | 0.115358744 | 0.101312651 |
| ENSGALG00010018369 | 0.932202656 | 0.31757879  |
| ENSGALG00010018370 | 0.058329623 | 0.014006682 |
| ENSGALG00010018371 | 0.653768353 | 0.529077528 |
| ENSGALG00010018372 | 0.977837793 | 0.247362494 |
| ENSGALG00010018373 | 0.413681442 | 0.210398046 |
| ENSGALG00010018374 | 0.959669929 | 0.243540521 |
| ENSGALG00010018375 | 0.285272007 | 0.109169955 |
| ENSGALG00010018376 | 0.772264328 | 0.188351026 |
| ENSGALG00010018377 | 0.560961564 | 0.19671491  |
| ENSGALG00010018378 | 0.989165638 | 0.332718789 |
| ENSGALG00010018379 | 0.985530937 | 0.292498059 |
| ENSGALG00010018380 | 0.853629428 | 0.294432934 |
| ENSGALG00010018381 | 0.971457349 | 0.309897673 |
| ENSGALG00010018383 | 0.811136184 | 0.26867791  |
| ENSGALG00010018384 | 0.893241011 | 0.162112924 |
| ENSGALG00010018385 | 0.964192501 | 0.233674951 |
| ENSGALG00010018387 | 0.988020897 | 0.369288776 |
| ENSGALG00010018388 | 0.959214809 | 0.30480063  |
| ENSGALG00010018390 | 0.719034557 | 0.268083045 |
| ENSGALG00010018391 | 0.890756035 | 0.422851667 |
| ENSGALG00010018392 | 0.363332073 | 0.116301156 |
| ENSGALG00010018393 | 0.551666263 | 0.07165635  |
| ENSGALG00010018394 | 0.295736713 | 0.165463329 |
| ENSGALG00010018395 | 0.73741703  | 0.230692692 |
| ENSGALG00010018396 | 0.695793464 | 0.08967859  |
| ENSGALG00010018397 | 0.236036274 | 0.006577611 |
| ENSGALG00010018398 | 0.689826658 | 0.328704745 |
| ENSGALG00010018399 | 0.955783873 | 0.208770799 |
| ENSGALG00010018400 | 0.908588171 | 0.457443138 |
| ENSGALG00010018401 | 0.733221193 | 0.118139071 |
| ENSGALG00010018402 | 0.329661263 | 0.151807418 |



|                    |             |             |
|--------------------|-------------|-------------|
| ENSGALG00010018403 | 0.636265573 | 0.282527515 |
| ENSGALG00010018404 | 0.974178703 | 0.304980592 |
| ENSGALG00010018405 | 0.850335864 | 0.468930368 |
| ENSGALG00010018406 | 0.918494472 | 0.273294666 |
| ENSGALG00010018407 | 0.375927362 | 0.072713138 |
| ENSGALG00010018409 | 0.828457425 | 0.239115988 |
| ENSGALG00010018410 | 0.595593199 | 0.49166769  |
| ENSGALG00010018413 | 0.10444442  | 0.029044879 |
| ENSGALG00010018414 | 0.954636055 | 0.258980576 |
| ENSGALG00010018415 | 0.899136375 | 0.288761391 |
| ENSGALG00010018416 | 0.577218298 | 0.142984689 |
| ENSGALG00010018417 | 0.538787396 | 0.073820137 |
| ENSGALG00010018418 | 0.467424892 | 0.192766651 |
| ENSGALG00010018419 | 0.977652103 | 0.236591313 |
| ENSGALG00010018420 | 0.982973539 | 0.313453298 |
| ENSGALG00010018421 | 0.882468973 | 0.301080321 |
| ENSGALG00010018422 | 0.921933533 | 0.321252753 |
| ENSGALG00010018423 | 0.993620816 | 0.338536433 |
| ENSGALG00010018424 | 0.365255074 | 0.237443633 |
| ENSGALG00010018425 | 0.697581123 | 0.092244013 |
| ENSGALG00010018426 | 0.709168115 | 0.199258531 |
| ENSGALG00010018427 | 0.977610155 | 0.323943539 |
| ENSGALG00010018428 | 0.354738917 | 0.143589189 |
| ENSGALG00010018429 | 0.581967834 | 0.207525449 |
| ENSGALG00010018430 | 0.954228362 | 0.235078355 |
| ENSGALG00010018431 | 0.719916402 | 0.139460461 |
| ENSGALG00010018432 | 0.50026114  | 0.146664567 |
| ENSGALG00010018433 | 0.757067395 | 0.232564728 |
| ENSGALG00010018434 | 0.951481588 | 0.231563144 |
| ENSGALG00010018435 | 0.554093061 | 0.000155523 |
| ENSGALG00010018436 | 0.249638649 | 0.135084198 |
| ENSGALG00010018437 | 0.581904939 | 0.321691422 |
| ENSGALG00010018438 | 0.966612103 | 0.27361025  |
| ENSGALG00010018439 | 0.871964999 | 0.28429807  |
| ENSGALG00010018440 | 0.957283268 | 0.331168264 |
| ENSGALG00010018441 | 0.755835659 | 0.035147607 |
| ENSGALG00010018442 | 0.518152467 | 0.294480795 |
| ENSGALG00010018443 | 0.973465908 | 0.309957333 |
| ENSGALG00010018444 | 0.681526195 | 0.190464461 |
| ENSGALG00010018445 | 0.11424227  | 0.089371422 |
| ENSGALG00010018446 | 0.571221408 | 0.466449675 |
| ENSGALG00010018447 | 0.666979454 | 0.256711722 |
| ENSGALG00010018448 | 0.989281708 | 0.321325364 |
| ENSGALG00010018449 | 0.438958713 | 0.265364588 |
| ENSGALG00010018450 | 0.841666987 | 0.275939515 |
| ENSGALG00010018451 | 0.492376372 | 0.034852948 |
| ENSGALG00010018452 | 0.865111946 | 0.294717534 |
| ENSGALG00010018453 | 0.93785623  | 0.194151738 |
| ENSGALG00010018454 | 0.573616664 | 0.213996849 |
| ENSGALG00010018455 | 0.992961418 | 0.340117412 |
| ENSGALG00010018457 | 0.459512896 | 0.172576762 |
| ENSGALG00010018458 | 0.93963489  | 0.255217007 |
| ENSGALG00010018459 | 0.959157336 | 0.276962618 |
| ENSGALG00010018460 | 0.915595911 | 0.363632877 |
| ENSGALG00010018461 | 0.592989352 | 0.170406447 |
| ENSGALG00010018462 | 0.928229012 | 0.254460158 |

|                    |             |             |
|--------------------|-------------|-------------|
| ENSGALG00010018463 | 0.941082455 | 0.314093013 |
| ENSGALG00010018465 | 0.983659369 | 0.387876719 |
| ENSGALG00010018466 | 0.985495922 | 0.300315083 |
| ENSGALG00010018467 | 0.844095442 | 0.333246545 |
| ENSGALG00010018468 | 0.927007695 | 0.319918958 |
| ENSGALG00010018469 | 0.379837363 | 0.045397379 |
| ENSGALG00010018470 | 0.690281225 | 0.033747074 |
| ENSGALG00010018471 | 0.954957395 | 0.160605846 |
| ENSGALG00010018472 | 0.957636501 | 0.195936584 |
| ENSGALG00010018473 | 0.924500137 | 0.313478872 |
| ENSGALG00010018474 | 0.791332075 | 0.309455302 |
| ENSGALG00010018475 | 0.101450501 | 0.13043918  |
| ENSGALG00010018476 | 0.88150855  | 0.308380845 |
| ENSGALG00010018478 | 0.270451009 | 0.090541667 |
| ENSGALG00010018480 | 0.509996401 | 0.289997197 |
| ENSGALG00010018481 | 0.233285045 | 0.256694515 |
| ENSGALG00010018482 | 0.873722099 | 0.324473501 |
| ENSGALG00010018484 | 0.365259184 | 0.356937382 |
| ENSGALG00010018485 | 0.922185506 | 0.341368997 |
| ENSGALG00010018486 | 0.574907892 | 0.07415261  |
| ENSGALG00010018487 | 0.242771369 | 0.092389954 |
| ENSGALG00010018488 | 0.62159949  | 0.048618726 |
| ENSGALG00010018489 | 0.487323392 | 0.293889626 |
| ENSGALG00010018490 | 0.846309855 | 0.214321261 |
| ENSGALG00010018491 | 0.889412208 | 0.410833945 |
| ENSGALG00010018492 | 0.956529469 | 0.342782836 |
| ENSGALG00010018493 | 0.83168522  | 0.282082934 |
| ENSGALG00010018494 | 0.986962594 | 0.300561157 |
| ENSGALG00010018495 | 0.320729011 | 0.144028995 |
| ENSGALG00010018496 | 0.36832015  | 0.432096526 |
| ENSGALG00010018497 | 0.155710768 | 0.124093449 |
| ENSGALG00010018498 | 0.541988294 | 0.330580754 |
| ENSGALG00010018499 | 0.017946301 | 0.123217195 |
| ENSGALG00010018500 | 0.385516603 | 0.085383902 |
| ENSGALG00010018501 | 0.193693735 | 0.05612844  |
| ENSGALG00010018502 | 0.605796386 | 0.204685789 |
| ENSGALG00010018503 | 0.774760229 | 0.418117052 |
| ENSGALG00010018504 | 0.97265006  | 0.334219022 |
| ENSGALG00010018505 | 0.119792704 | 0.123972007 |
| ENSGALG00010018506 | 0.188768338 | 0.079027933 |
| ENSGALG00010018508 | 0.432990893 | 0.170114811 |
| ENSGALG00010018509 | 0.759668534 | 0.473464594 |
| ENSGALG00010018510 | 0.702958742 | 0.231147391 |
| ENSGALG00010018511 | 0.314192443 | 0.038581821 |
| ENSGALG00010018512 | 0.956330986 | 0.319375767 |
| ENSGALG00010018513 | 0.929634639 | 0.300489233 |
| ENSGALG00010018514 | 0.644970597 | 0.109236815 |
| ENSGALG00010018515 | 0.96838217  | 0.3269434   |
| ENSGALG00010018516 | 0.952523049 | 0.386233369 |
| ENSGALG00010018517 | 0.773382465 | 0.163922628 |
| ENSGALG00010018518 | 0.652899121 | 0.1841315   |
| ENSGALG00010018519 | 0.975514895 | 0.333424992 |
| ENSGALG00010018520 | 0.296890738 | 0.383143551 |
| ENSGALG00010018521 | 0.938105637 | 0.21977879  |
| ENSGALG00010018522 | 0.289230757 | 0.27977729  |
| ENSGALG00010018523 | 0.800755656 | 0.271241071 |

|                    |             |             |
|--------------------|-------------|-------------|
| ENSGALG00010018524 | 0.91848643  | 0.368410113 |
| ENSGALG00010018525 | 0.985437402 | 0.337227122 |
| ENSGALG00010018526 | 0.605577292 | 0.041810821 |
| ENSGALG00010018527 | 0.558829644 | 0.144497775 |
| ENSGALG00010018528 | 0.201765669 | 0.224282393 |
| ENSGALG00010018529 | 0.740917238 | 0.1816104   |
| ENSGALG00010018530 | 0.81794206  | 0.183129466 |
| ENSGALG00010018531 | 0.817813593 | 0.249742609 |
| ENSGALG00010018532 | 0.926885967 | 0.304697789 |
| ENSGALG00010018533 | 0.891532988 | 0.290511481 |
| ENSGALG00010018534 | 0.890728568 | 0.208730592 |
| ENSGALG00010018535 | 0.472593331 | 0.011712359 |
| ENSGALG00010018536 | 0.874983417 | 0.257469752 |
| ENSGALG00010018537 | 0.393347877 | 0.27953304  |
| ENSGALG00010018539 | 0.836361247 | 0.379812779 |
| ENSGALG00010018540 | 0.943274409 | 0.347300932 |
| ENSGALG00010018542 | 0.888526394 | 0.28786534  |
| ENSGALG00010018543 | 0.664173085 | 0.023798692 |
| ENSGALG00010018544 | 0.990363165 | 0.332087094 |
| ENSGALG00010018546 | 0.921717817 | 0.32746249  |
| ENSGALG00010018548 | 0.977342837 | 0.348826945 |
| ENSGALG00010018549 | 0.633872582 | 0.2992129   |
| ENSGALG00010018551 | 0.810177441 | 0.376747227 |
| ENSGALG00010018552 | 0.950279086 | 0.235009626 |
| ENSGALG00010018553 | 0.951999596 | 0.339289174 |
| ENSGALG00010018554 | 0.428808266 | 0.072056468 |
| ENSGALG00010018555 | 0.776656349 | 0.546405835 |
| ENSGALG00010018556 | 0.969339992 | 0.340913027 |
| ENSGALG00010018557 | 0.898781581 | 0.238541809 |
| ENSGALG00010018558 | 0.778367905 | 0.275376062 |
| ENSGALG00010018559 | 0.903087775 | 0.182917331 |
| ENSGALG00010018560 | 0.959413933 | 0.333513314 |
| ENSGALG00010018561 | 0.960770801 | 0.344526728 |
| ENSGALG00010018562 | 0.49751762  | 0.13639528  |
| ENSGALG00010018563 | 0.424460353 | 0.38996328  |
| ENSGALG00010018564 | 0.605052997 | 0.28177213  |
| ENSGALG00010018565 | 0.948624906 | 0.299064127 |
| ENSGALG00010018566 | 0.929087463 | 0.327538335 |
| ENSGALG00010018568 | 0.556688282 | 0.128242977 |
| ENSGALG00010018572 | 0.697073407 | 0.120137418 |
| ENSGALG00010018573 | 0.878596962 | 0.202765396 |
| ENSGALG00010018574 | 0.439051397 | 0.058346462 |
| ENSGALG00010018575 | 0.157659324 | 0.193545808 |
| ENSGALG00010018576 | 0.391138237 | 0.045179838 |
| ENSGALG00010018577 | 0.196148984 | 0.112781612 |
| ENSGALG00010018579 | 0.892335014 | 0.259910311 |
| ENSGALG00010018581 | 0.797047753 | 0.254654497 |
| ENSGALG00010018582 | 0.968287525 | 0.362837555 |
| ENSGALG00010018583 | 0.860820497 | 0.47439157  |
| ENSGALG00010018585 | 0.187514554 | 0.108479243 |
| ENSGALG00010018587 | 0.968273533 | 0.377562706 |
| ENSGALG00010018588 | 0.784933461 | 0.026620439 |
| ENSGALG00010018590 | 0.198189675 | 0.600964987 |
| ENSGALG00010018592 | 0.406358069 | 0.095586701 |
| ENSGALG00010018593 | 0.962046377 | 0.233856409 |
| ENSGALG00010018594 | 0.867516075 | 0.372833136 |

|                    |             |             |
|--------------------|-------------|-------------|
| ENSGALG00010018595 | 0.356646144 | 0.112989608 |
| ENSGALG00010018596 | 0.497682353 | 0.262695088 |
| ENSGALG00010018597 | 0.893448216 | 0.310027168 |
| ENSGALG00010018598 | 0.00194312  | 0.39464953  |
| ENSGALG00010018599 | 0.854293767 | 0.295106743 |
| ENSGALG00010018601 | 0.800238419 | 0.146996468 |
| ENSGALG00010018602 | 0.841563354 | 0.139179334 |
| ENSGALG00010018604 | 0.981687607 | 0.35117459  |
| ENSGALG00010018606 | 0.726470279 | 0.352009054 |
| ENSGALG00010018607 | 0.655893894 | 0.406490563 |
| ENSGALG00010018608 | 0.939183265 | 0.309822725 |
| ENSGALG00010018609 | 0.95400363  | 0.385534096 |
| ENSGALG00010018611 | 0.975637653 | 0.330133884 |
| ENSGALG00010018612 | 0.745507064 | 0.253676706 |
| ENSGALG00010018613 | 0.353985317 | 0.089620528 |
| ENSGALG00010018614 | 0.167788947 | 0.189987988 |
| ENSGALG00010018615 | 0.526260727 | 0.311089116 |
| ENSGALG00010018616 | 0.461627311 | 0.218392127 |
| ENSGALG00010018617 | 0.154449768 | 0.134778997 |
| ENSGALG00010018618 | 0.154952521 | 0.237339793 |
| ENSGALG00010018619 | 0.222303042 | 0.406341651 |
| ENSGALG00010018620 | 0.057696991 | 0.254212354 |
| ENSGALG00010018621 | 0.364997592 | 0.385832511 |
| ENSGALG00010018623 | 0.576735778 | 0.020606917 |
| ENSGALG00010018624 | 0.418831742 | 0.347202975 |
| ENSGALG00010018625 | 0.278307637 | 0.137000131 |
| ENSGALG00010018627 | 0.987141708 | 0.274150574 |
| ENSGALG00010018628 | 0.98697434  | 0.390100707 |
| ENSGALG00010018630 | 0.800957158 | 0.28019599  |
| ENSGALG00010018631 | 0.939112586 | 0.297608537 |
| ENSGALG00010018633 | 0.941815168 | 0.302003639 |
| ENSGALG00010018634 | 0.662392926 | 0.599397474 |
| ENSGALG00010018635 | 0.380006087 | 0.091193993 |
| ENSGALG00010018636 | 0.419267344 | 0.223422683 |
| ENSGALG00010018638 | 0.305992917 | 0.014365182 |
| ENSGALG00010018641 | 0.789113636 | 0.107250744 |
| ENSGALG00010018644 | 0.702950742 | 0.178472201 |
| ENSGALG00010018646 | 0.247327187 | 0.114340784 |
| ENSGALG00010018649 | 0.603708806 | 0.320942568 |
| ENSGALG00010018650 | 0.496354282 | 0.119669621 |
| ENSGALG00010018654 | 0.838277634 | 0.238778363 |
| ENSGALG00010018655 | 0.86344515  | 0.326335317 |
| ENSGALG00010018658 | 0.298918274 | 0.082467963 |
| ENSGALG00010018659 | 0.777141479 | 0.255150004 |
| ENSGALG00010018662 | 0.473755225 | 0.073232749 |
| ENSGALG00010018665 | 0.943549308 | 0.181452616 |
| ENSGALG00010018668 | 0.886021432 | 0.183085252 |
| ENSGALG00010018669 | 0.397516991 | 0.125566479 |
| ENSGALG00010018670 | 0.976218113 | 0.314535132 |
| ENSGALG00010018672 | 0.947708106 | 0.369364525 |
| ENSGALG00010018673 | 0.916702143 | 0.394319237 |
| ENSGALG00010018679 | 0.208550923 | 0.676301294 |
| ENSGALG00010018683 | 0.208550923 | 0.676301294 |
| ENSGALG00010018684 | 0.176393029 | 0.071464513 |
| ENSGALG00010018685 | 0.685691742 | 0.235550476 |
| ENSGALG00010018686 | 0.699102129 | 0.402545651 |

|                    |             |             |
|--------------------|-------------|-------------|
| ENSGALG00010018687 | 0.84778351  | 0.379659475 |
| ENSGALG00010018688 | 0.469355273 | 0.169426084 |
| ENSGALG00010018689 | 0.446527462 | 0.416082474 |
| ENSGALG00010018690 | 0.663174831 | 0.200692854 |
| ENSGALG00010018692 | 0.441819133 | 0.039039095 |
| ENSGALG00010018693 | 0.96290535  | 0.296489539 |
| ENSGALG00010018694 | 0.727719639 | 0.003157501 |
| ENSGALG00010018696 | 0.714922253 | 0.261356024 |
| ENSGALG00010018697 | 0.222592387 | 0.008744502 |
| ENSGALG00010018698 | 0.761576325 | 0.343511832 |
| ENSGALG00010018699 | 0.881775489 | 0.08931558  |
| ENSGALG00010018700 | 0.168674977 | 0.164599621 |
| ENSGALG00010018701 | 0.936989634 | 0.297790176 |
| ENSGALG00010018702 | 0.381415582 | 0.158761082 |
| ENSGALG00010018704 | 0.807112181 | 0.281279979 |
| ENSGALG00010018705 | 0.674203857 | 0.286106111 |
| ENSGALG00010018707 | 0.948204603 | 0.38508539  |
| ENSGALG00010018708 | 0.266137114 | 0.107784983 |
| ENSGALG00010018709 | 0.955373827 | 0.450483143 |
| ENSGALG00010018710 | 0.151941586 | 0.192919805 |
| ENSGALG00010018711 | 0.38480368  | 0.180523942 |
| ENSGALG00010018713 | 0.915762995 | 0.474527484 |
| ENSGALG00010018715 | 0.751464647 | 0.3773513   |
| ENSGALG00010018716 | 0.879677436 | 0.130618666 |
| ENSGALG00010018717 | 0.822713393 | 0.351816894 |
| ENSGALG00010018718 | 0.937252053 | 0.442919536 |
| ENSGALG00010018719 | 0.978873322 | 0.325356699 |
| ENSGALG00010018721 | 0.880626999 | 0.23461364  |
| ENSGALG00010018724 | 0.944006893 | 0.254450847 |
| ENSGALG00010018726 | 0.960952931 | 0.343236127 |
| ENSGALG00010018727 | 0.982402705 | 0.361141793 |
| ENSGALG00010018729 | 0.062647106 | 0.113238793 |
| ENSGALG00010018730 | 0.791416476 | 0.162767393 |
| ENSGALG00010018732 | 0.996872234 | 0.340631941 |
| ENSGALG00010018733 | 0.109611382 | 0.062066971 |
| ENSGALG00010018736 | 0.946414448 | 0.285660204 |
| ENSGALG00010018741 | 0.140930048 | 0.25285935  |
| ENSGALG00010018746 | 0.984543733 | 0.362420302 |
| ENSGALG00010018747 | 0.884921724 | 0.36081032  |
| ENSGALG00010018749 | 0.874403378 | 0.323776205 |
| ENSGALG00010018750 | 0.767443589 | 0.144918622 |
| ENSGALG00010018752 | 0.943728326 | 0.252856107 |
| ENSGALG00010018753 | 0.973926435 | 0.280459437 |
| ENSGALG00010018754 | 0.210737532 | 0.2782819   |
| ENSGALG00010018756 | 0.772119388 | 0.359404629 |
| ENSGALG00010018758 | 0.989389653 | 0.389287499 |
| ENSGALG00010018759 | 0.02436834  | 0.087960992 |
| ENSGALG00010018761 | 0.364062464 | 0.234751622 |
| ENSGALG00010018763 | 0.307721442 | 0.16757223  |
| ENSGALG00010018764 | 0.531504014 | 0.091306841 |
| ENSGALG00010018767 | 0.965454231 | 0.311399593 |
| ENSGALG00010018768 | 0.789288964 | 0.005506829 |
| ENSGALG00010018770 | 0.464931148 | 0.111851499 |
| ENSGALG00010018771 | 0.651791878 | 0.209806587 |
| ENSGALG00010018773 | 0.712394963 | 0.405575087 |
| ENSGALG00010018774 | 0.813404301 | 0.391761977 |

|                    |             |             |
|--------------------|-------------|-------------|
| ENSGALG00010018779 | 0.219386918 | 0.079388121 |
| ENSGALG00010018780 | 0.81008733  | 0.17544446  |
| ENSGALG00010018782 | 0.610909726 | 0.249168689 |
| ENSGALG00010018783 | 0.996700432 | 0.328735346 |
| ENSGALG00010018786 | 0.955714767 | 0.256330821 |
| ENSGALG00010018787 | 0.285272007 | 0.109169955 |
| ENSGALG00010018791 | 0.271701261 | 0.072417625 |
| ENSGALG00010018793 | 0.282406982 | 0.207798308 |
| ENSGALG00010018794 | 0.798611229 | 0.279321711 |
| ENSGALG00010018796 | 0.296907026 | 0.29766939  |
| ENSGALG00010018799 | 0.477696248 | 0.22234344  |
| ENSGALG00010018802 | 0.76286099  | 0.105819436 |
| ENSGALG00010018805 | 0.675546319 | 0.213871642 |
| ENSGALG00010018806 | 0.981704464 | 0.362032325 |
| ENSGALG00010018807 | 0.272338042 | 0.636062138 |
| ENSGALG00010018808 | 0.470442704 | 0.153775362 |
| ENSGALG00010018809 | 0.052043394 | 0.148409613 |
| ENSGALG00010018810 | 0.760117846 | 0.132548844 |
| ENSGALG00010018811 | 0.98761931  | 0.328217619 |
| ENSGALG00010018815 | 0.601111149 | 0.441611185 |
| ENSGALG00010018818 | 0.548712388 | 0.414185835 |
| ENSGALG00010018819 | 0.936358241 | 0.172216048 |
| ENSGALG00010018821 | 0.521637529 | 0.255429938 |
| ENSGALG00010018822 | 0.925324788 | 0.198321803 |
| ENSGALG00010018823 | 0.391554564 | 0.254219257 |
| ENSGALG00010018826 | 0.17788957  | 0.176536204 |
| ENSGALG00010018827 | 0.052836869 | 0.101827534 |
| ENSGALG00010018829 | 0.980285866 | 0.212631097 |
| ENSGALG00010018831 | 0.174937087 | 0.339205564 |
| ENSGALG00010018832 | 0.876651933 | 0.257282073 |
| ENSGALG00010018833 | 0.122233383 | 0.066518296 |
| ENSGALG00010018834 | 0.967895866 | 0.28631698  |
| ENSGALG00010018835 | 0.194347177 | 0.260186353 |
| ENSGALG00010018837 | 0.595202122 | 0.142912236 |
| ENSGALG00010018838 | 0.129994491 | 0.083997967 |
| ENSGALG00010018839 | 0.991523793 | 0.317016231 |
| ENSGALG00010018840 | 0.47427365  | 0.157841352 |
| ENSGALG00010018841 | 0.331513246 | 0.087475111 |
| ENSGALG00010018842 | 0.189240572 | 0.04996112  |
| ENSGALG00010018843 | 0.805806052 | 0.262027781 |
| ENSGALG00010018846 | 0.97301304  | 0.296090519 |
| ENSGALG00010018847 | 0.745608352 | 0.350294965 |
| ENSGALG00010018848 | 0.990791591 | 0.290231376 |
| ENSGALG00010018849 | 0.385618883 | 0.148250795 |
| ENSGALG00010018851 | 0.187514554 | 0.108479243 |
| ENSGALG00010018852 | 0.838223409 | 0.304289    |
| ENSGALG00010018854 | 0.912196715 | 0.304564828 |
| ENSGALG00010018855 | 0.096017235 | 0.130411689 |
| ENSGALG00010018857 | 0.778658092 | 0.328995355 |
| ENSGALG00010018858 | 0.949426765 | 0.403132551 |
| ENSGALG00010018859 | 0.385953062 | 0.133261917 |
| ENSGALG00010018860 | 0.870677566 | 0.438876855 |
| ENSGALG00010018864 | 0.535546203 | 0.111251061 |
| ENSGALG00010018865 | 0.617158982 | 0.136691966 |
| ENSGALG00010018867 | 0.883729926 | 0.311244665 |
| ENSGALG00010018870 | 0.009429422 | 0.134618735 |

|                    |             |             |
|--------------------|-------------|-------------|
| ENSGALG00010018872 | 0.323560159 | 0.151171516 |
| ENSGALG00010018873 | 0.378628271 | 0.092431246 |
| ENSGALG00010018874 | 0.547547085 | 0.093171378 |
| ENSGALG00010018876 | 0.968343007 | 0.277940909 |
| ENSGALG00010018877 | 0.910901004 | 0.263327956 |
| ENSGALG00010018879 | 0.240819747 | 0.227392974 |
| ENSGALG00010018880 | 0.575777377 | 0.044672158 |
| ENSGALG00010018881 | 0.150772323 | 0.206989863 |
| ENSGALG00010018882 | 0.569881342 | 0.309321171 |
| ENSGALG00010018883 | 0.977671525 | 0.306747367 |
| ENSGALG00010018884 | 0.634592111 | 0.478344833 |
| ENSGALG00010018885 | 0.907991563 | 0.384289734 |
| ENSGALG00010018886 | 0.013892708 | 0.185886393 |
| ENSGALG00010018887 | 0.375078681 | 0.05260243  |
| ENSGALG00010018888 | 0.398716294 | 0.159015355 |
| ENSGALG00010018889 | 0.614722612 | 0.250993963 |
| ENSGALG00010018891 | 0.30111148  | 0.294565426 |
| ENSGALG00010018892 | 0.987766531 | 0.328731458 |
| ENSGALG00010018893 | 0.659278087 | 0.333695388 |
| ENSGALG00010018894 | 0.968565895 | 0.414131888 |
| ENSGALG00010018895 | 0.750398528 | 0.27374889  |
| ENSGALG00010018896 | 0.535770959 | 0.068979637 |
| ENSGALG00010018897 | 0.923596816 | 0.379227333 |
| ENSGALG00010018899 | 0.118598935 | 0.089623314 |
| ENSGALG00010018900 | 0.919135754 | 0.475461983 |
| ENSGALG00010018901 | 0.627789214 | 0.171513431 |
| ENSGALG00010018902 | 0.950866655 | 0.343217111 |
| ENSGALG00010018903 | 0.991683601 | 0.306134521 |
| ENSGALG00010018904 | 0.590425043 | 0.288321107 |
| ENSGALG00010018905 | 0.873077306 | 0.326834841 |
| ENSGALG00010018908 | 0.187514554 | 0.108479243 |
| ENSGALG00010018909 | 0.240009845 | 0.061560005 |
| ENSGALG00010018910 | 0.427672062 | 0.266490373 |
| ENSGALG00010018911 | 0.915990076 | 0.291537727 |
| ENSGALG00010018912 | 0.554029887 | 0.170548871 |
| ENSGALG00010018913 | 0.905161159 | 0.183546191 |
| ENSGALG00010018914 | 0.373070537 | 0.117661301 |
| ENSGALG00010018915 | 0.930682543 | 0.229328927 |
| ENSGALG00010018916 | 0.157439455 | 0.232970686 |
| ENSGALG00010018917 | 0.674455934 | 0.529229924 |
| ENSGALG00010018918 | 0.744361756 | 0.228350004 |
| ENSGALG00010018919 | 0.925856531 | 0.281383642 |
| ENSGALG00010018920 | 0.984903895 | 0.318408216 |
| ENSGALG00010018921 | 0.194295924 | 0.153515203 |
| ENSGALG00010018922 | 0.934270202 | 0.275249335 |
| ENSGALG00010018923 | 0.961414803 | 0.335692235 |
| ENSGALG00010018924 | 0.575824478 | 0.177244929 |
| ENSGALG00010018925 | 0.066557466 | 0.010019976 |
| ENSGALG00010018927 | 0.310433083 | 0.239339214 |
| ENSGALG00010018928 | 0.165579132 | 0.333956354 |
| ENSGALG00010018929 | 0.606278308 | 0.640429872 |
| ENSGALG00010018930 | 0.36325893  | 0.316306182 |
| ENSGALG00010018931 | 0.840758667 | 0.26697124  |
| ENSGALG00010018932 | 0.923208958 | 0.293153652 |
| ENSGALG00010018933 | 0.780720094 | 0.312484852 |
| ENSGALG00010018934 | 0.707927097 | 0.242764883 |

|                    |             |             |
|--------------------|-------------|-------------|
| ENSGALG00010018936 | 0.489226367 | 0.072243656 |
| ENSGALG00010018937 | 0.033313717 | 0.12050399  |
| ENSGALG00010018939 | 0.795836049 | 0.243067264 |
| ENSGALG00010018940 | 0.840099865 | 0.42653     |
| ENSGALG00010018941 | 0.994213018 | 0.307078522 |
| ENSGALG00010018943 | 0.96936573  | 0.334354198 |
| ENSGALG00010018944 | 0.386642026 | 0.442142809 |
| ENSGALG00010018945 | 0.958015021 | 0.411698961 |
| ENSGALG00010018946 | 0.271701261 | 0.072417625 |
| ENSGALG00010018947 | 0.90939555  | 0.585869381 |
| ENSGALG00010018948 | 0.976075598 | 0.322943309 |
| ENSGALG00010018949 | 0.602687917 | 0.085122408 |
| ENSGALG00010018950 | 0.983774028 | 0.324431927 |
| ENSGALG00010018951 | 0.625124748 | 0.25239842  |
| ENSGALG00010018953 | 0.401639624 | 0.101384476 |
| ENSGALG00010018954 | 0.397218637 | 0.284730518 |
| ENSGALG00010018955 | 0.976610984 | 0.229297638 |
| ENSGALG00010018956 | 0.806968855 | 0.291434979 |
| ENSGALG00010018957 | 0.794883116 | 0.336122723 |
| ENSGALG00010018958 | 0.904101236 | 0.265005379 |
| ENSGALG00010018959 | 0.971564962 | 0.305794677 |
| ENSGALG00010018960 | 0.981993579 | 0.298978855 |
| ENSGALG00010018961 | 0.879547636 | 0.272849493 |
| ENSGALG00010018962 | 0.383947044 | 0.128562519 |
| ENSGALG00010018963 | 0.738601169 | 0.300973049 |
| ENSGALG00010018964 | 0.491445346 | 0.305578384 |
| ENSGALG00010018966 | 0.781669233 | 0.079777164 |
| ENSGALG00010018967 | 0.232855177 | 0.454557133 |
| ENSGALG00010018968 | 0.951048431 | 0.363459742 |
| ENSGALG00010018969 | 0.423189025 | 0.110904155 |
| ENSGALG00010018970 | 0.815390905 | 0.258170078 |
| ENSGALG00010018971 | 0.967082725 | 0.298333915 |
| ENSGALG00010018972 | 0.645090941 | 0.180742242 |
| ENSGALG00010018973 | 0.359638984 | 0.152426409 |
| ENSGALG00010018974 | 0.706938987 | 0.022530142 |
| ENSGALG00010018975 | 0.358375733 | 0.338828017 |
| ENSGALG00010018977 | 0.959895487 | 0.415865326 |
| ENSGALG00010018980 | 0.189240572 | 0.04996112  |
| ENSGALG00010018981 | 0.099028626 | 0.079591415 |
| ENSGALG00010018982 | 0.442836758 | 0.194898196 |
| ENSGALG00010018983 | 0.570530671 | 0.21917747  |
| ENSGALG00010018985 | 0.737024331 | 0.284065326 |
| ENSGALG00010018986 | 0.978690966 | 0.261823128 |
| ENSGALG00010018987 | 0.900918521 | 0.258215449 |
| ENSGALG00010018990 | 0.291991191 | 0.116811562 |
| ENSGALG00010018991 | 0.113555875 | 0.360422532 |
| ENSGALG00010018992 | 0.975199533 | 0.334013745 |
| ENSGALG00010018993 | 0.080303579 | 0.497702184 |
| ENSGALG00010018997 | 0.17023583  | 0.001774827 |
| ENSGALG00010018998 | 0.974945724 | 0.353785002 |
| ENSGALG00010018999 | 0.66791336  | 0.146992295 |
| ENSGALG00010019000 | 0.892846652 | 0.346891182 |
| ENSGALG00010019001 | 0.96090872  | 0.307128398 |
| ENSGALG00010019004 | 0.931237378 | 0.381578863 |
| ENSGALG00010019005 | 0.9074545   | 0.385436281 |
| ENSGALG00010019006 | 0.979842995 | 0.348490644 |



|                    |             |             |
|--------------------|-------------|-------------|
| ENSGALG00010019008 | 0.958257763 | 0.315718497 |
| ENSGALG00010019009 | 0.94752288  | 0.248897664 |
| ENSGALG00010019011 | 0.842755081 | 0.037914339 |
| ENSGALG00010019012 | 0.964080107 | 0.264899543 |
| ENSGALG00010019013 | 0.865839186 | 0.163531797 |
| ENSGALG00010019014 | 0.295081293 | 0.447565639 |
| ENSGALG00010019015 | 0.326066916 | 0.174218685 |
| ENSGALG00010019016 | 0.966275812 | 0.388815178 |
| ENSGALG00010019017 | 0.957252732 | 0.257880854 |
| ENSGALG00010019018 | 0.926040697 | 0.249626141 |
| ENSGALG00010019019 | 0.881711356 | 0.202027939 |
| ENSGALG00010019020 | 0.875370791 | 0.194920877 |
| ENSGALG00010019021 | 0.521791128 | 0.348402103 |
| ENSGALG00010019023 | 0.262410674 | 0.206406221 |
| ENSGALG00010019024 | 0.926597137 | 0.345544175 |
| ENSGALG00010019025 | 0.92200619  | 0.306055302 |
| ENSGALG00010019026 | 0.915367999 | 0.25157971  |
| ENSGALG00010019027 | 0.947203633 | 0.296004694 |
| ENSGALG00010019028 | 0.904047918 | 0.255923183 |
| ENSGALG00010019029 | 0.647232203 | 0.00213186  |
| ENSGALG00010019030 | 0.533449398 | 0.047459005 |
| ENSGALG00010019032 | 0.966805935 | 0.407574338 |
| ENSGALG00010019033 | 0.38480368  | 0.180523942 |
| ENSGALG00010019034 | 0.966786854 | 0.345637241 |
| ENSGALG00010019035 | 0.7047876   | 0.310130893 |
| ENSGALG00010019036 | 0.779525619 | 0.292027315 |
| ENSGALG00010019038 | 0.32144915  | 0.012786713 |
| ENSGALG00010019040 | 0.916471928 | 0.325049571 |
| ENSGALG00010019041 | 0.301507978 | 0.081049267 |
| ENSGALG00010019042 | 0.544635693 | 0.393481026 |
| ENSGALG00010019043 | 0.103884326 | 0.060421836 |
| ENSGALG00010019044 | 0.277566769 | 0.107857127 |
| ENSGALG00010019045 | 0.997976491 | 0.325427191 |
| ENSGALG00010019046 | 0.001915583 | 0.038512321 |
| ENSGALG00010019047 | 0.105081013 | 0.114717373 |
| ENSGALG00010019049 | 0.874844802 | 0.288814279 |
| ENSGALG00010019050 | 0.003329705 | 0.110284121 |
| ENSGALG00010019051 | 0.956911359 | 0.266973305 |
| ENSGALG00010019052 | 0.567647804 | 0.419756545 |
| ENSGALG00010019053 | 0.645542203 | 0.140728894 |
| ENSGALG00010019058 | 0.111723115 | 0.155918956 |
| ENSGALG00010019059 | 0.939154025 | 0.379093755 |
| ENSGALG00010019060 | 0.580283279 | 0.16117949  |
| ENSGALG00010019061 | 0.374419648 | 0.109023883 |
| ENSGALG00010019062 | 0.468093952 | 0.429360409 |
| ENSGALG00010019063 | 0.355639478 | 0.141537604 |
| ENSGALG00010019064 | 0.224165794 | 0.101285947 |
| ENSGALG00010019065 | 0.997339361 | 0.321679337 |
| ENSGALG00010019067 | 0.289652683 | 0.380292044 |
| ENSGALG00010019068 | 0.95007601  | 0.282467658 |
| ENSGALG00010019069 | 0.333634937 | 0.155730388 |
| ENSGALG00010019072 | 0.805531489 | 0.522985589 |
| ENSGALG00010019073 | 0.086476784 | 0.029149839 |
| ENSGALG00010019076 | 0.61607162  | 0.452256617 |
| ENSGALG00010019077 | 0.580995155 | 0.035643329 |
| ENSGALG00010019078 | 0.579332134 | 0.197981249 |

|                    |             |             |
|--------------------|-------------|-------------|
| ENSGALG00010019079 | 0.475715639 | 0.171211702 |
| ENSGALG00010019080 | 0.276941659 | 0.150920925 |
| ENSGALG00010019081 | 0.956693442 | 0.23236151  |
| ENSGALG00010019082 | 0.928779629 | 0.305089067 |
| ENSGALG00010019083 | 0.694385691 | 0.074118005 |
| ENSGALG00010019084 | 0.477096086 | 0.175579694 |
| ENSGALG00010019086 | 0.203991683 | 0.058221925 |
| ENSGALG00010019087 | 0.927829949 | 0.373333627 |
| ENSGALG00010019088 | 0.596856531 | 0.13887257  |
| ENSGALG00010019093 | 0.935559974 | 0.317814833 |
| ENSGALG00010019094 | 0.82746688  | 0.36680545  |
| ENSGALG00010019096 | 0.33040952  | 0.152955128 |
| ENSGALG00010019097 | 0.295416887 | 0.201236025 |
| ENSGALG00010019099 | 0.339843734 | 0.219060419 |
| ENSGALG00010019100 | 0.393293574 | 0.180300648 |
| ENSGALG00010019101 | 0.836609247 | 0.508939629 |
| ENSGALG00010019102 | 0.466560581 | 0.137287145 |
| ENSGALG00010019103 | 0.630782635 | 0.443080753 |
| ENSGALG00010019104 | 0.822686563 | 0.258783481 |
| ENSGALG00010019106 | 0.103173471 | 0.274363727 |
| ENSGALG00010019107 | 0.324020854 | 0.340314887 |
| ENSGALG00010019108 | 0.82313181  | 0.332494807 |
| ENSGALG00010019109 | 0.017946301 | 0.123217195 |
| ENSGALG00010019110 | 0.956066819 | 0.30756257  |
| ENSGALG00010019111 | 0.285272007 | 0.109169955 |
| ENSGALG00010019112 | 0.427497446 | 0.200374047 |
| ENSGALG00010019113 | 0.736013186 | 0.033865451 |
| ENSGALG00010019114 | 0.58023346  | 0.402537575 |
| ENSGALG00010019115 | 0.37186876  | 0.224920886 |
| ENSGALG00010019116 | 0.799215624 | 0.128147167 |
| ENSGALG00010019117 | 0.894242581 | 0.348343693 |
| ENSGALG00010019120 | 0.93809383  | 0.347116141 |
| ENSGALG00010019121 | 0.225881852 | 0.168191494 |
| ENSGALG00010019123 | 0.931008283 | 0.191790267 |
| ENSGALG00010019124 | 0.917641602 | 0.341526686 |
| ENSGALG00010019125 | 0.611644498 | 0.3433324   |
| ENSGALG00010019126 | 0.921537936 | 0.347231242 |
| ENSGALG00010019127 | 0.8083089   | 0.282707086 |
| ENSGALG00010019128 | 0.947931201 | 0.317573113 |
| ENSGALG00010019130 | 0.92848771  | 0.185535724 |
| ENSGALG00010019131 | 0.705631249 | 0.294174373 |
| ENSGALG00010019132 | 0.952469454 | 0.31646251  |
| ENSGALG00010019133 | 0.216433634 | 0.680598293 |
| ENSGALG00010019134 | 0.16910645  | 0.545330104 |
| ENSGALG00010019135 | 0.296265053 | 0.120759158 |
| ENSGALG00010019136 | 0.168179534 | 0.388908483 |
| ENSGALG00010019138 | 0.356980791 | 0.3524601   |
| ENSGALG00010019139 | 0.439556067 | 0.175744343 |
| ENSGALG00010019140 | 0.286755814 | 0.501844446 |
| ENSGALG00010019141 | 0.341306915 | 0.054975724 |
| ENSGALG00010019143 | 0.325929383 | 0.143359216 |
| ENSGALG00010019144 | 0.687080181 | 0.7102957   |
| ENSGALG00010019145 | 0.885033492 | 0.236895055 |
| ENSGALG00010019146 | 0.991668134 | 0.336639034 |
| ENSGALG00010019147 | 0.270260157 | 0.18667361  |
| ENSGALG00010019148 | 0.446413027 | 0.174454307 |

|                    |             |             |
|--------------------|-------------|-------------|
| ENSGALG00010019149 | 0.980393123 | 0.330860909 |
| ENSGALG00010019152 | 0.734955618 | 0.008034594 |
| ENSGALG00010019155 | 0.763104523 | 0.284755224 |
| ENSGALG00010019156 | 0.200570274 | 0.091667991 |
| ENSGALG00010019157 | 0.31155034  | 0.03137051  |
| ENSGALG00010019158 | 0.871937246 | 0.412499128 |
| ENSGALG00010019160 | 0.219386918 | 0.079388121 |
| ENSGALG00010019161 | 0.214000092 | 0.162332731 |
| ENSGALG00010019163 | 0.036215381 | 0.132705637 |
| ENSGALG00010019164 | 0.48486274  | 0.087297481 |
| ENSGALG00010019166 | 0.873167455 | 0.199206327 |
| ENSGALG00010019168 | 0.292794004 | 0.478363193 |
| ENSGALG00010019169 | 0.118149305 | 0.076199018 |
| ENSGALG00010019171 | 0.722581579 | 0.353345307 |
| ENSGALG00010019172 | 0.924379694 | 0.16122084  |
| ENSGALG00010019173 | 0.772048074 | 0.274065654 |
| ENSGALG00010019174 | 0.968687262 | 0.333042312 |
| ENSGALG00010019175 | 0.542793897 | 0.310904867 |
| ENSGALG00010019176 | 0.126447213 | 0.085856668 |
| ENSGALG00010019178 | 0.1025044   | 0.187932477 |
| ENSGALG00010019180 | 0.090998159 | 0.09480036  |
| ENSGALG00010019182 | 0.22560639  | 0.280052113 |
| ENSGALG00010019183 | 0.771536514 | 0.332185659 |
| ENSGALG00010019184 | 0.921100052 | 0.301912013 |
| ENSGALG00010019185 | 0.976113162 | 0.277686762 |
| ENSGALG00010019186 | 0.968741769 | 0.397571835 |
| ENSGALG00010019187 | 0.285272007 | 0.109169955 |
| ENSGALG00010019188 | 0.658546451 | 0.246847922 |
| ENSGALG00010019189 | 0.370422358 | 0.310252012 |
| ENSGALG00010019190 | 0.010610177 | 0.193088893 |
| ENSGALG00010019193 | 0.757705459 | 0.236551853 |
| ENSGALG00010019194 | 0.864670686 | 0.430272211 |
| ENSGALG00010019195 | 0.048269049 | 0.154346147 |
| ENSGALG00010019200 | 0.311541422 | 0.175102084 |
| ENSGALG00010019204 | 0.899573913 | 0.236514309 |
| ENSGALG00010019205 | 0.074772865 | 0.02402643  |
| ENSGALG00010019206 | 0.905087096 | 0.365522692 |
| ENSGALG00010019208 | 0.571951029 | 0.314218538 |
| ENSGALG00010019209 | 0.814555117 | 0.354478482 |
| ENSGALG00010019212 | 0.776729833 | 0.376686723 |
| ENSGALG00010019213 | 0.626615374 | 0.120418318 |
| ENSGALG00010019215 | 0.412072705 | 0.174752596 |
| ENSGALG00010019218 | 0.169808299 | 0.037463341 |
| ENSGALG00010019220 | 0.067239119 | 0.578238882 |
| ENSGALG00010019221 | 0.85445504  | 0.216446279 |
| ENSGALG00010019223 | 0.821033135 | 0.049690242 |
| ENSGALG00010019225 | 0.940797562 | 0.393642266 |
| ENSGALG00010019226 | 0.264589269 | 0.150326967 |
| ENSGALG00010019227 | 0.960291367 | 0.296287513 |
| ENSGALG00010019229 | 0.389704111 | 0.119474745 |
| ENSGALG00010019230 | 0.972856985 | 0.315378881 |
| ENSGALG00010019232 | 0.504963247 | 0.116614512 |
| ENSGALG00010019233 | 0.918743838 | 0.213466206 |
| ENSGALG00010019234 | 0.043544722 | 0.088274573 |
| ENSGALG00010019235 | 0.616664892 | 0.237403631 |
| ENSGALG00010019236 | 0.818636588 | 0.371999744 |

|                    |             |             |
|--------------------|-------------|-------------|
| ENSGALG00010019237 | 0.408248733 | 0.341871092 |
| ENSGALG00010019238 | 0.044165284 | 0.108128939 |
| ENSGALG00010019239 | 0.79988127  | 0.238236512 |
| ENSGALG00010019240 | 0.451472003 | 0.268942556 |
| ENSGALG00010019243 | 0.865654102 | 0.213955554 |
| ENSGALG00010019245 | 0.662938251 | 0.27795676  |
| ENSGALG00010019246 | 0.890785492 | 0.336419163 |
| ENSGALG00010019247 | 0.400215036 | 0.132215663 |
| ENSGALG00010019248 | 0.844805343 | 0.246378922 |
| ENSGALG00010019249 | 0.359626391 | 0.02035457  |
| ENSGALG00010019250 | 0.378403277 | 0.149830149 |
| ENSGALG00010019252 | 0.902358482 | 0.306906414 |
| ENSGALG00010019253 | 0.124989663 | 0.129465107 |
| ENSGALG00010019254 | 0.846340405 | 0.204321318 |
| ENSGALG00010019256 | 0.7074612   | 0.380341784 |
| ENSGALG00010019257 | 0.883734288 | 0.141049471 |
| ENSGALG00010019258 | 0.90786892  | 0.370208848 |
| ENSGALG00010019259 | 0.824291272 | 0.2684609   |
| ENSGALG00010019260 | 0.391520552 | 0.065399671 |
| ENSGALG00010019262 | 0.445028333 | 0.041401531 |
| ENSGALG00010019263 | 0.958720943 | 0.271463667 |
| ENSGALG00010019264 | 0.386720587 | 0.038989607 |
| ENSGALG00010019265 | 0.427394042 | 0.171353786 |
| ENSGALG00010019266 | 0.434452305 | 0.050078324 |
| ENSGALG00010019267 | 0.965630378 | 0.268877978 |
| ENSGALG00010019268 | 0.817352818 | 0.226152439 |
| ENSGALG00010019269 | 0.900216718 | 0.308639018 |
| ENSGALG00010019270 | 0.959275664 | 0.364365121 |
| ENSGALG00010019271 | 0.815363098 | 0.419301299 |
| ENSGALG00010019273 | 0.755876762 | 0.37290288  |
| ENSGALG00010019274 | 0.324020854 | 0.340314887 |
| ENSGALG00010019275 | 0.715660326 | 0.294216032 |
| ENSGALG00010019276 | 0.068933014 | 0.036514652 |
| ENSGALG00010019277 | 0.885154398 | 0.350701277 |
| ENSGALG00010019278 | 0.460468218 | 0.102759802 |
| ENSGALG00010019279 | 0.182855371 | 0.171838264 |
| ENSGALG00010019280 | 0.791205139 | 0.273501809 |
| ENSGALG00010019282 | 0.867605119 | 0.269082354 |
| ENSGALG00010019283 | 0.986366764 | 0.323737835 |
| ENSGALG00010019284 | 0.886257423 | 0.249045919 |
| ENSGALG00010019285 | 0.920776805 | 0.321089854 |
| ENSGALG00010019286 | 0.025513556 | 0.004025169 |
| ENSGALG00010019287 | 0.725446276 | 0.226576035 |
| ENSGALG00010019288 | 0.937656417 | 0.30967369  |
| ENSGALG00010019289 | 0.824214937 | 0.344420708 |
| ENSGALG00010019290 | 0.258836631 | 0.282706581 |
| ENSGALG00010019291 | 0.701818988 | 0.254275579 |
| ENSGALG00010019292 | 0.977441199 | 0.365179554 |
| ENSGALG00010019294 | 0.401606939 | 0.133521938 |
| ENSGALG00010019295 | 0.883459671 | 0.435598426 |
| ENSGALG00010019296 | 0.506003672 | 0.137821335 |
| ENSGALG00010019297 | 0.935183876 | 0.368896888 |
| ENSGALG00010019298 | 0.804665833 | 0.318092269 |
| ENSGALG00010019299 | 0.459629367 | 0.692775726 |
| ENSGALG00010019300 | 0.088415256 | 0.045818649 |
| ENSGALG00010019301 | 0.491881344 | 0.145226145 |

|                    |             |             |
|--------------------|-------------|-------------|
| ENSGALG00010019302 | 0.796249866 | 0.377839757 |
| ENSGALG00010019303 | 0.549653586 | 0.066014554 |
| ENSGALG00010019304 | 0.698453726 | 0.23805344  |
| ENSGALG00010019305 | 0.983001965 | 0.322642379 |
| ENSGALG00010019306 | 0.003616255 | 0.020981987 |
| ENSGALG00010019307 | 0.822629003 | 0.191522436 |
| ENSGALG00010019308 | 0.263763053 | 0.168119672 |
| ENSGALG00010019310 | 0.890052809 | 0.361530558 |
| ENSGALG00010019311 | 0.662362941 | 0.233865915 |
| ENSGALG00010019312 | 0.608599366 | 0.222728219 |
| ENSGALG00010019313 | 0.587756186 | 0.357924034 |
| ENSGALG00010019315 | 0.399864362 | 0.02586642  |
| ENSGALG00010019316 | 0.845583266 | 0.256145363 |
| ENSGALG00010019317 | 0.642880085 | 0.173144998 |
| ENSGALG00010019318 | 0.944706407 | 0.324994022 |
| ENSGALG00010019319 | 0.983459226 | 0.336004437 |
| ENSGALG00010019322 | 0.757376469 | 0.426969565 |
| ENSGALG00010019323 | 0.626194708 | 0.21073538  |
| ENSGALG00010019325 | 0.863605738 | 0.224896785 |
| ENSGALG00010019326 | 0.063606688 | 0.124346693 |
| ENSGALG00010019327 | 0.042405664 | 0.223332755 |
| ENSGALG00010019328 | 0.050216828 | 0.232292189 |
| ENSGALG00010019329 | 0.31793183  | 0.229053843 |
| ENSGALG00010019330 | 0.147390775 | 0.391670696 |
| ENSGALG00010019331 | 0.97603812  | 0.352984137 |
| ENSGALG00010019333 | 0.912727819 | 0.240100858 |
| ENSGALG00010019334 | 0.84268767  | 0.222742535 |
| ENSGALG00010019335 | 0.911434054 | 0.347893129 |
| ENSGALG00010019336 | 0.897499877 | 0.287688206 |
| ENSGALG00010019337 | 0.825698036 | 0.374766722 |
| ENSGALG00010019339 | 0.582285199 | 0.028510764 |
| ENSGALG00010019340 | 0.391460109 | 0.674779943 |
| ENSGALG00010019341 | 0.297090418 | 0.136289521 |
| ENSGALG00010019342 | 0.783668658 | 0.42142033  |
| ENSGALG00010019343 | 0.270451009 | 0.090541667 |
| ENSGALG00010019344 | 0.476789055 | 0.108463039 |
| ENSGALG00010019345 | 0.892846707 | 0.303605443 |
| ENSGALG00010019346 | 0.264239718 | 0.073427965 |
| ENSGALG00010019347 | 0.637415015 | 0.326486369 |
| ENSGALG00010019348 | 0.542405948 | 0.147375687 |
| ENSGALG00010019349 | 0.660836626 | 0.097124777 |
| ENSGALG00010019350 | 0.882528593 | 0.243362895 |
| ENSGALG00010019352 | 0.457010693 | 0.302962748 |
| ENSGALG00010019353 | 0.446789332 | 0.270690673 |
| ENSGALG00010019355 | 0.835970205 | 0.110759811 |
| ENSGALG00010019356 | 0.960222239 | 0.258069982 |
| ENSGALG00010019357 | 0.764207149 | 0.09670652  |
| ENSGALG00010019359 | 0.892282153 | 0.172762084 |
| ENSGALG00010019360 | 0.924050446 | 0.214674583 |
| ENSGALG00010019361 | 0.436167963 | 0.205943322 |
| ENSGALG00010019362 | 0.352108103 | 0.037003535 |
| ENSGALG00010019363 | 0.777326144 | 0.314735513 |
| ENSGALG00010019365 | 0.472951924 | 0.10312309  |
| ENSGALG00010019366 | 0.504189449 | 0.301178594 |
| ENSGALG00010019368 | 0.402344685 | 0.144981318 |
| ENSGALG00010019370 | 0.433328622 | 0.366830239 |

|                    |             |             |
|--------------------|-------------|-------------|
| ENSGALG00010019371 | 0.887386211 | 0.209851784 |
| ENSGALG00010019372 | 0.081151286 | 0.17285279  |
| ENSGALG00010019373 | 0.294956036 | 0.384269906 |
| ENSGALG00010019375 | 0.247842294 | 0.110509314 |
| ENSGALG00010019376 | 0.949684318 | 0.374573436 |
| ENSGALG00010019378 | 0.387012569 | 0.137721351 |
| ENSGALG00010019379 | 0.67325979  | 0.327127743 |
| ENSGALG00010019381 | 0.854283758 | 0.346542087 |
| ENSGALG00010019384 | 0.320112398 | 0.076847516 |
| ENSGALG00010019385 | 0.35255689  | 0.488340344 |
| ENSGALG00010019386 | 0.193220178 | 0.353700786 |
| ENSGALG00010019387 | 0.774743206 | 0.165741627 |
| ENSGALG00010019388 | 0.749698576 | 0.594904244 |
| ENSGALG00010019390 | 0.450459874 | 0.284506407 |
| ENSGALG00010019391 | 0.973143816 | 0.3214346   |
| ENSGALG00010019392 | 0.159562845 | 0.284588947 |
| ENSGALG00010019397 | 0.636980851 | 0.188245851 |
| ENSGALG00010019398 | 0.80241582  | 0.379643268 |
| ENSGALG00010019399 | 0.643816463 | 0.374369933 |
| ENSGALG00010019401 | 0.912600428 | 0.37727731  |
| ENSGALG00010019403 | 0.291370056 | 0.315671263 |
| ENSGALG00010019405 | 0.517999275 | 0.149539616 |
| ENSGALG00010019408 | 0.066975135 | 0.131726206 |
| ENSGALG00010019409 | 0.331509393 | 0.156730178 |
| ENSGALG00010019411 | 0.599820337 | 0.366246803 |
| ENSGALG00010019412 | 0.915282604 | 0.273567615 |
| ENSGALG00010019414 | 0.384831073 | 0.205747021 |
| ENSGALG00010019415 | 0.229431786 | 0.758985273 |
| ENSGALG00010019416 | 0.958784303 | 0.212032197 |
| ENSGALG00010019417 | 0.219006177 | 0.189840674 |
| ENSGALG00010019418 | 0.968206622 | 0.358076486 |
| ENSGALG00010019419 | 0.153340062 | 0.151847247 |
| ENSGALG00010019420 | 0.019832685 | 0.161555892 |
| ENSGALG00010019422 | 0.822927429 | 0.161571525 |
| ENSGALG00010019423 | 0.59703398  | 0.381592162 |
| ENSGALG00010019424 | 0.265558089 | 0.028821141 |
| ENSGALG00010019426 | 0.846783867 | 0.264649861 |
| ENSGALG00010019428 | 0.150872385 | 0.266006492 |
| ENSGALG00010019429 | 0.07074662  | 0.222051839 |
| ENSGALG00010019430 | 0.39047417  | 0.286719999 |
| ENSGALG00010019431 | 0.992306158 | 0.323499149 |
| ENSGALG00010019432 | 0.265624263 | 0.242681341 |
| ENSGALG00010019433 | 0.395556858 | 0.102965232 |
| ENSGALG00010019434 | 0.376995479 | 0.131258754 |
| ENSGALG00010019438 | 0.874469236 | 0.2764168   |
| ENSGALG00010019441 | 0.864582626 | 0.368307861 |
| ENSGALG00010019443 | 0.799530531 | 0.000894555 |
| ENSGALG00010019446 | 0.3238092   | 0.228042266 |
| ENSGALG00010019447 | 0.008043983 | 0.110635211 |
| ENSGALG00010019448 | 0.379394869 | 0.170237467 |
| ENSGALG00010019449 | 0.008984826 | 0.14972573  |
| ENSGALG00010019451 | 0.998629169 | 0.341302834 |
| ENSGALG00010019454 | 0.040262459 | 0.118277088 |
| ENSGALG00010019456 | 0.346756653 | 0.20843815  |
| ENSGALG00010019458 | 0.526545625 | 0.100600065 |
| ENSGALG00010019459 | 0.399453749 | 0.144668892 |

|                    |             |             |
|--------------------|-------------|-------------|
| ENSGALG00010019461 | 0.902927678 | 0.255224267 |
| ENSGALG00010019463 | 0.838475031 | 0.297886394 |
| ENSGALG00010019464 | 0.139919825 | 0.215228643 |
| ENSGALG00010019470 | 0.950517971 | 0.281990413 |
| ENSGALG00010019471 | 0.7601619   | 0.177896514 |
| ENSGALG00010019472 | 0.985130221 | 0.311648267 |
| ENSGALG00010019473 | 0.697164731 | 0.087845869 |
| ENSGALG00010019474 | 0.120588646 | 0.036127785 |
| ENSGALG00010019477 | 0.573510946 | 0.180539433 |
| ENSGALG00010019480 | 0.595755189 | 0.011331714 |
| ENSGALG00010019481 | 0.947359328 | 0.270875898 |
| ENSGALG00010019482 | 0.436840389 | 0.147435237 |
| ENSGALG00010019483 | 0.297116197 | 0.41599158  |
| ENSGALG00010019484 | 0.868634678 | 0.277812414 |
| ENSGALG00010019485 | 0.556485924 | 0.226321444 |
| ENSGALG00010019487 | 0.951643457 | 0.265962418 |
| ENSGALG00010019488 | 0.504020497 | 0.141821405 |
| ENSGALG00010019489 | 0.309655755 | 0.987979031 |
| ENSGALG00010019490 | 0.198078233 | 0.140231658 |
| ENSGALG00010019491 | 0.592469137 | 0.161344344 |
| ENSGALG00010019492 | 0.477215269 | 0.036619118 |
| ENSGALG00010019493 | 0.870617313 | 0.457355406 |
| ENSGALG00010019494 | 0.213034228 | 0.217907685 |
| ENSGALG00010019495 | 0.919612908 | 0.375589762 |
| ENSGALG00010019496 | 0.150783357 | 0.138472589 |
| ENSGALG00010019498 | 0.964276808 | 0.246474319 |
| ENSGALG00010019500 | 0.488774598 | 0.153390563 |
| ENSGALG00010019501 | 0.386764803 | 0.105517621 |
| ENSGALG00010019502 | 0.529513804 | 0.184251181 |
| ENSGALG00010019504 | 0.77432206  | 0.138991993 |
| ENSGALG00010019505 | 0.069749942 | 0.335536912 |
| ENSGALG00010019506 | 0.264239718 | 0.073427965 |
| ENSGALG00010019509 | 0.986956137 | 0.331604483 |
| ENSGALG00010019510 | 0.256828349 | 0.119064955 |
| ENSGALG00010019512 | 0.216433634 | 0.680598293 |
| ENSGALG00010019513 | 0.951579747 | 0.309193281 |
| ENSGALG00010019515 | 0.283339801 | 0.139137713 |
| ENSGALG00010019516 | 0.011512255 | 0.172988189 |
| ENSGALG00010019520 | 0.697582504 | 0.09360967  |
| ENSGALG00010019521 | 0.847223003 | 0.386473972 |
| ENSGALG00010019522 | 0.751579775 | 0.162790379 |
| ENSGALG00010019524 | 0.789053322 | 0.251760866 |
| ENSGALG00010019526 | 0.18918263  | 0.131669257 |
| ENSGALG00010019527 | 0.122535307 | 0.201969958 |
| ENSGALG00010019529 | 0.96188296  | 0.318497384 |
| ENSGALG00010019532 | 0.359572359 | 0.215759064 |
| ENSGALG00010019533 | 0.012433676 | 0.134633327 |
| ENSGALG00010019534 | 0.894788581 | 0.052035262 |
| ENSGALG00010019536 | 0.728382158 | 0.225640642 |
| ENSGALG00010019539 | 0.591137526 | 0.538817871 |
| ENSGALG00010019540 | 0.501401869 | 0.079033641 |
| ENSGALG00010019541 | 0.875419723 | 0.402359334 |
| ENSGALG00010019542 | 0.187679389 | 0.434625542 |
| ENSGALG00010019543 | 0.503625771 | 0.167124734 |
| ENSGALG00010019546 | 0.977536216 | 0.329085948 |
| ENSGALG00010019547 | 0.685122725 | 0.3271086   |

|                    |             |             |
|--------------------|-------------|-------------|
| ENSGALG00010019549 | 0.641400114 | 0.218366777 |
| ENSGALG00010019550 | 0.909871949 | 0.553681489 |
| ENSGALG00010019554 | 0.791191039 | 0.321415103 |
| ENSGALG00010019557 | 0.871769954 | 0.276883388 |
| ENSGALG00010019561 | 0.657529483 | 0.420613029 |
| ENSGALG00010019563 | 0.656363414 | 0.528448183 |
| ENSGALG00010019564 | 0.387967253 | 0.165125476 |
| ENSGALG00010019566 | 0.781009668 | 0.212677142 |
| ENSGALG00010019569 | 0.007468656 | 0.049904393 |
| ENSGALG00010019570 | 0.131354461 | 0.148795542 |
| ENSGALG00010019572 | 0.642951836 | 0.391722066 |
| ENSGALG00010019574 | 0.402235172 | 0.110063183 |
| ENSGALG00010019576 | 0.861403467 | 0.471066783 |
| ENSGALG00010019577 | 0.854966497 | 0.46095803  |
| ENSGALG00010019578 | 0.277003752 | 0.123429704 |
| ENSGALG00010019580 | 0.798989435 | 0.355220355 |
| ENSGALG00010019581 | 0.204000582 | 0.195456204 |
| ENSGALG00010019583 | 0.087838418 | 0.172074926 |
| ENSGALG00010019584 | 0.042410527 | 0.304346966 |
| ENSGALG00010019585 | 0.76668054  | 0.235748522 |
| ENSGALG00010019586 | 0.982348165 | 0.321476432 |
| ENSGALG00010019587 | 0.87122226  | 0.289203758 |
| ENSGALG00010019588 | 0.994175815 | 0.297069257 |
| ENSGALG00010019591 | 0.972796868 | 0.385616864 |
| ENSGALG00010019592 | 0.874956951 | 0.333937612 |
| ENSGALG00010019593 | 0.265558089 | 0.028821141 |
| ENSGALG00010019594 | 0.1220949   | 0.321728692 |
| ENSGALG00010019595 | 0.194323177 | 0.15612226  |
| ENSGALG00010019596 | 0.273556489 | 0.254934839 |
| ENSGALG00010019598 | 0.169093436 | 0.185905303 |
| ENSGALG00010019600 | 0.515990997 | 0.25740723  |
| ENSGALG00010019601 | 0.556123064 | 0.103073039 |
| ENSGALG00010019602 | 0.984550729 | 0.330305215 |
| ENSGALG00010019603 | 0.786931478 | 0.288972551 |
| ENSGALG00010019604 | 0.713363648 | 0.368966409 |
| ENSGALG00010019605 | 0.347317946 | 0.329723052 |
| ENSGALG00010019606 | 0.286231124 | 0.564253946 |
| ENSGALG00010019607 | 0.218358475 | 0.234724241 |
| ENSGALG00010019609 | 0.178596619 | 0.267662718 |
| ENSGALG00010019610 | 0.037000306 | 0.026150352 |
| ENSGALG00010019611 | 0.397604372 | 0.185366621 |
| ENSGALG00010019612 | 0.096276908 | 0.128250401 |
| ENSGALG00010019613 | 0.749292232 | 0.060111168 |
| ENSGALG00010019614 | 0.91388052  | 0.207824511 |
| ENSGALG00010019615 | 0.449851794 | 0.288683491 |
| ENSGALG00010019617 | 0.508583297 | 0.323843252 |
| ENSGALG00010019618 | 0.555722965 | 0.413006886 |
| ENSGALG00010019619 | 0.502673267 | 0.17289254  |
| ENSGALG00010019620 | 0.719473207 | 0.321758217 |
| ENSGALG00010019621 | 0.996279284 | 0.334988911 |
| ENSGALG00010019622 | 0.731349986 | 0.32699825  |
| ENSGALG00010019623 | 0.559033941 | 0.341316387 |
| ENSGALG00010019624 | 0.660257177 | 0.33128696  |
| ENSGALG00010019625 | 0.346497454 | 0.186692691 |
| ENSGALG00010019626 | 0.794887085 | 0.309482466 |
| ENSGALG00010019630 | 0.526182145 | 0.487723413 |



|                    |             |             |
|--------------------|-------------|-------------|
| ENSGALG00010019633 | 0.120837503 | 0.12463419  |
| ENSGALG00010019634 | 0.705631159 | 0.140691706 |
| ENSGALG00010019635 | 0.539877438 | 0.180246127 |
| ENSGALG00010019636 | 0.260737039 | 0.071294785 |
| ENSGALG00010019638 | 0.12557176  | 0.257281993 |
| ENSGALG00010019639 | 0.447708034 | 0.006632806 |
| ENSGALG00010019640 | 0.669681752 | 0.243801879 |
| ENSGALG00010019641 | 0.98105011  | 0.353298628 |
| ENSGALG00010019642 | 0.975209175 | 0.36033124  |
| ENSGALG00010019643 | 0.673550183 | 0.217712688 |
| ENSGALG00010019644 | 0.188136    | 0.203869654 |
| ENSGALG00010019645 | 0.512700534 | 0.249786058 |
| ENSGALG00010019646 | 0.991533908 | 0.357166991 |
| ENSGALG00010019647 | 0.451226839 | 0.07510809  |
| ENSGALG00010019648 | 0.464015477 | 0.103819775 |
| ENSGALG00010019649 | 0.845700649 | 0.435351041 |
| ENSGALG00010019650 | 0.82344564  | 0.328207759 |
| ENSGALG00010019652 | 0.952893608 | 0.251474879 |
| ENSGALG00010019653 | 0.12782002  | 0.079061164 |
| ENSGALG00010019654 | 0.066636898 | 0.034508313 |
| ENSGALG00010019655 | 0.994458757 | 0.32562902  |
| ENSGALG00010019656 | 0.034711552 | 0.174561793 |
| ENSGALG00010019657 | 0.215539175 | 0.267155037 |
| ENSGALG00010019659 | 0.962756718 | 0.296546883 |
| ENSGALG00010019660 | 0.124208349 | 0.231610899 |
| ENSGALG00010019661 | 0.178023947 | 0.015309573 |
| ENSGALG00010019663 | 0.118889497 | 0.169789476 |
| ENSGALG00010019665 | 0.243318161 | 0.127581427 |
| ENSGALG00010019666 | 0.729383263 | 0.217233313 |
| ENSGALG00010019667 | 0.447561227 | 0.024542757 |
| ENSGALG00010019668 | 0.449833658 | 0.266381134 |
| ENSGALG00010019669 | 0.096001156 | 0.423019274 |
| ENSGALG00010019670 | 0.767503164 | 0.27766659  |
| ENSGALG00010019671 | 0.530466824 | 0.043131505 |
| ENSGALG00010019673 | 0.866690025 | 0.450190535 |
| ENSGALG00010019674 | 0.69439929  | 0.27173476  |
| ENSGALG00010019675 | 0.058334703 | 0.32478189  |
| ENSGALG00010019676 | 0.361355167 | 0.130059372 |
| ENSGALG00010019679 | 0.110708131 | 0.163989027 |
| ENSGALG00010019680 | 0.902428937 | 0.268203524 |
| ENSGALG00010019682 | 0.660930774 | 0.375275974 |
| ENSGALG00010019683 | 0.960483363 | 0.505145002 |
| ENSGALG00010019684 | 0.772755404 | 0.401822483 |
| ENSGALG00010019690 | 0.861814663 | 0.335693848 |
| ENSGALG00010019691 | 0.270451009 | 0.090541667 |
| ENSGALG00010019692 | 0.262631387 | 0.271769228 |
| ENSGALG00010019693 | 0.886558462 | 0.168828938 |
| ENSGALG00010019694 | 0.992617593 | 0.34573777  |
| ENSGALG00010019696 | 0.979256079 | 0.273177585 |
| ENSGALG00010019697 | 0.984804863 | 0.289469805 |
| ENSGALG00010019698 | 0.990213226 | 0.359571497 |
| ENSGALG00010019699 | 0.22050683  | 0.289579243 |
| ENSGALG00010019700 | 0.473811722 | 0.106344856 |
| ENSGALG00010019702 | 0.235205039 | 0.228774835 |
| ENSGALG00010019703 | 0.689803208 | 0.199812012 |
| ENSGALG00010019704 | 0.686765439 | 0.104420521 |

|                    |             |             |
|--------------------|-------------|-------------|
| ENSGALG00010019705 | 0.438496929 | 0.085491879 |
| ENSGALG00010019706 | 0.505035128 | 0.226798462 |
| ENSGALG00010019708 | 0.312521416 | 0.270764182 |
| ENSGALG00010019709 | 0.029372996 | 0.136538814 |
| ENSGALG00010019710 | 0.619259653 | 0.32710741  |
| ENSGALG00010019711 | 0.264239718 | 0.073427965 |
| ENSGALG00010019712 | 0.489148369 | 0.15157912  |
| ENSGALG00010019713 | 0.724464196 | 0.115003174 |
| ENSGALG00010019714 | 0.488364789 | 0.178119529 |
| ENSGALG00010019716 | 0.799153579 | 0.26315868  |
| ENSGALG00010019717 | 0.585049779 | 0.30584014  |
| ENSGALG00010019718 | 0.118666798 | 0.010778759 |
| ENSGALG00010019722 | 0.250038398 | 0.197820031 |
| ENSGALG00010019723 | 0.972209331 | 0.254082397 |
| ENSGALG00010019724 | 0.845952158 | 0.267780353 |
| ENSGALG00010019725 | 0.986290639 | 0.402216277 |
| ENSGALG00010019726 | 0.98885097  | 0.328534067 |
| ENSGALG00010019727 | 0.728227632 | 0.228816981 |
| ENSGALG00010019729 | 0.201702771 | 0.045897305 |
| ENSGALG00010019730 | 0.288220476 | 0.161651656 |
| ENSGALG00010019731 | 0.958173478 | 0.270849178 |
| ENSGALG00010019732 | 0.215763709 | 0.003063604 |
| ENSGALG00010019733 | 0.249977783 | 0.036254529 |
| ENSGALG00010019734 | 0.355783338 | 0.182683574 |
| ENSGALG00010019735 | 0.189893275 | 0.238180505 |
| ENSGALG00010019736 | 0.265558089 | 0.028821141 |
| ENSGALG00010019738 | 0.480546695 | 0.070494589 |
| ENSGALG00010019741 | 0.694368256 | 0.010370289 |
| ENSGALG00010019743 | 0.994532709 | 0.325705153 |
| ENSGALG00010019744 | 0.688298933 | 0.155483314 |
| ENSGALG00010019747 | 0.941764272 | 0.164407644 |
| ENSGALG00010019751 | 0.0231524   | 0.47459642  |
| ENSGALG00010019752 | 0.93835768  | 0.235409371 |
| ENSGALG00010019754 | 0.357744648 | 0.403997765 |
| ENSGALG00010019755 | 0.888752294 | 0.327751232 |
| ENSGALG00010019758 | 0.332069977 | 0.462193367 |
| ENSGALG00010019761 | 0.861965929 | 0.111534364 |
| ENSGALG00010019763 | 0.668555284 | 0.085420865 |
| ENSGALG00010019764 | 0.995515063 | 0.332219641 |
| ENSGALG00010019767 | 0.983736427 | 0.344624793 |
| ENSGALG00010019770 | 0.097308482 | 0.337550935 |
| ENSGALG00010019771 | 0.979396327 | 0.292050386 |
| ENSGALG00010019772 | 0.963107819 | 0.349765373 |
| ENSGALG00010019773 | 0.287420179 | 0.104388345 |
| ENSGALG00010019774 | 0.246789093 | 0.173070302 |
| ENSGALG00010019775 | 0.994344924 | 0.330818385 |
| ENSGALG00010019777 | 0.154731256 | 0.464287855 |
| ENSGALG00010019778 | 0.175549973 | 0.046711546 |
| ENSGALG00010019779 | 0.288888964 | 0.235006592 |
| ENSGALG00010019780 | 0.075484733 | 0.135992864 |
| ENSGALG00010019781 | 0.182591789 | 0.203069719 |
| ENSGALG00010019785 | 0.993635693 | 0.393462051 |
| ENSGALG00010019786 | 0.994205653 | 0.325442035 |
| ENSGALG00010019789 | 0.50515211  | 0.031313277 |
| ENSGALG00010019792 | 0.294661357 | 0.109904448 |
| ENSGALG00010019793 | 0.804346819 | 0.240143709 |

|                    |             |             |
|--------------------|-------------|-------------|
| ENSGALG00010019794 | 0.62923367  | 0.065848748 |
| ENSGALG00010019798 | 0.300390954 | 0.171341096 |
| ENSGALG00010019799 | 0.863885427 | 0.101965272 |
| ENSGALG00010019800 | 0.978694132 | 0.212571511 |
| ENSGALG00010019801 | 0.943471308 | 0.352548327 |
| ENSGALG00010019802 | 0.233207078 | 0.190025168 |
| ENSGALG00010019803 | 0.987560743 | 0.318982376 |
| ENSGALG00010019804 | 0.702698702 | 0.344679863 |
| ENSGALG00010019807 | 0.907357314 | 0.268484173 |
| ENSGALG00010019808 | 0.285179533 | 0.121954912 |
| ENSGALG00010019810 | 0.439768451 | 0.097952257 |
| ENSGALG00010019811 | 0.778294233 | 0.231230227 |
| ENSGALG00010019812 | 0.546136267 | 0.298039469 |
| ENSGALG00010019813 | 0.982932582 | 0.30771775  |
| ENSGALG00010019816 | 0.954023928 | 0.20728608  |
| ENSGALG00010019818 | 0.518946868 | 0.279639876 |
| ENSGALG00010019820 | 0.933998319 | 0.393613668 |
| ENSGALG00010019823 | 0.749168112 | 0.264595191 |
| ENSGALG00010019825 | 0.944661148 | 0.235766754 |
| ENSGALG00010019828 | 0.87462367  | 0.15477305  |
| ENSGALG00010019829 | 0.897688447 | 0.321610876 |
| ENSGALG00010019830 | 0.980680018 | 0.283769036 |
| ENSGALG00010019832 | 0.965738721 | 0.272829635 |
| ENSGALG00010019833 | 0.970208363 | 0.279425654 |
| ENSGALG00010019834 | 0.930603404 | 0.2139387   |
| ENSGALG00010019836 | 0.629422924 | 0.156780531 |
| ENSGALG00010019838 | 0.718173646 | 0.685083237 |
| ENSGALG00010019839 | 0.828492259 | 0.27411951  |
| ENSGALG00010019842 | 0.422889611 | 0.302620283 |
| ENSGALG00010019843 | 0.214413232 | 0.061734559 |
| ENSGALG00010019844 | 0.94272879  | 0.218100622 |
| ENSGALG00010019845 | 0.658585938 | 0.280618612 |
| ENSGALG00010019846 | 0.302093679 | 0.200883588 |
| ENSGALG00010019847 | 0.053422351 | 0.093673139 |
| ENSGALG00010019848 | 0.254773239 | 0.043440209 |
| ENSGALG00010019849 | 0.933498773 | 0.297230343 |
| ENSGALG00010019851 | 0.665416918 | 0.297620943 |
| ENSGALG00010019852 | 0.286212763 | 0.139913221 |
| ENSGALG00010019853 | 0.408661366 | 0.194193874 |
| ENSGALG00010019854 | 0.119618822 | 0.084577823 |
| ENSGALG00010019855 | 0.555043349 | 0.131280367 |
| ENSGALG00010019856 | 0.142674579 | 0.492022664 |
| ENSGALG00010019857 | 0.245700908 | 0.010899108 |
| ENSGALG00010019859 | 0.659693034 | 0.095934823 |
| ENSGALG00010019861 | 0.566754197 | 0.518680502 |
| ENSGALG00010019864 | 0.388899421 | 0.120062276 |
| ENSGALG00010019865 | 0.971331893 | 0.343841153 |
| ENSGALG00010019867 | 0.967937304 | 0.262297941 |
| ENSGALG00010019868 | 0.274586994 | 0.115798603 |
| ENSGALG00010019869 | 0.82762102  | 0.347861432 |
| ENSGALG00010019870 | 0.200570274 | 0.091667991 |
| ENSGALG00010019872 | 0.939013859 | 0.227781702 |
| ENSGALG00010019873 | 0.968342661 | 0.300934921 |
| ENSGALG00010019875 | 0.927433889 | 0.401183897 |
| ENSGALG00010019876 | 0.690504962 | 0.144641915 |
| ENSGALG00010019877 | 0.335339564 | 0.294710305 |

|                    |             |             |
|--------------------|-------------|-------------|
| ENSGALG00010019878 | 0.981053641 | 0.408633039 |
| ENSGALG00010019880 | 0.025739541 | 0.105032112 |
| ENSGALG00010019886 | 0.514649421 | 0.364338745 |
| ENSGALG00010019887 | 0.795311838 | 0.271251513 |
| ENSGALG00010019888 | 0.573795379 | 0.135681927 |
| ENSGALG00010019889 | 0.380458755 | 0.122221739 |
| ENSGALG00010019890 | 0.765777911 | 0.260020673 |
| ENSGALG00010019891 | 0.822712559 | 0.23047447  |
| ENSGALG00010019892 | 0.079237238 | 0.103487154 |
| ENSGALG00010019893 | 0.36117416  | 0.054562941 |
| ENSGALG00010019895 | 0.083417541 | 0.625326881 |
| ENSGALG00010019896 | 0.974983205 | 0.337527453 |
| ENSGALG00010019897 | 0.57615418  | 0.219426346 |
| ENSGALG00010019898 | 0.816848385 | 0.273189707 |
| ENSGALG00010019899 | 0.961496306 | 0.324280801 |
| ENSGALG00010019900 | 0.187176172 | 0.2981231   |
| ENSGALG00010019901 | 0.318813342 | 0.16516172  |
| ENSGALG00010019902 | 0.187514554 | 0.108479243 |
| ENSGALG00010019905 | 0.336366535 | 0.073523437 |
| ENSGALG00010019906 | 0.891585199 | 0.217000451 |
| ENSGALG00010019908 | 0.604430696 | 0.028134881 |
| ENSGALG00010019909 | 0.213883565 | 0.238548392 |
| ENSGALG00010019910 | 0.492681882 | 0.312314194 |
| ENSGALG00010019912 | 0.513207262 | 0.138554333 |
| ENSGALG00010019914 | 0.409100652 | 0.202453273 |
| ENSGALG00010019915 | 0.266137114 | 0.107784983 |
| ENSGALG00010019916 | 0.716531546 | 0.301892511 |
| ENSGALG00010019917 | 0.678321431 | 0.007390911 |
| ENSGALG00010019919 | 0.90176753  | 0.282329874 |
| ENSGALG00010019920 | 0.249295355 | 0.150040874 |
| ENSGALG00010019921 | 0.980024865 | 0.317849545 |
| ENSGALG00010019922 | 0.596365203 | 0.190795924 |
| ENSGALG00010019923 | 0.988952236 | 0.339724564 |
| ENSGALG00010019924 | 0.300017658 | 0.583254388 |
| ENSGALG00010019925 | 0.966329742 | 0.312537262 |
| ENSGALG00010019926 | 0.87004873  | 0.105606226 |
| ENSGALG00010019929 | 0.078695333 | 0.302709344 |
| ENSGALG00010019930 | 0.160827757 | 0.488970864 |
| ENSGALG00010019931 | 0.975675243 | 0.354629155 |
| ENSGALG00010019932 | 0.908470869 | 0.398229665 |
| ENSGALG00010019934 | 0.898036135 | 0.365884497 |
| ENSGALG00010019935 | 0.101536066 | 0.037078272 |
| ENSGALG00010019936 | 0.392748352 | 0.445400077 |
| ENSGALG00010019937 | 0.338714282 | 0.13932343  |
| ENSGALG00010019939 | 0.244796653 | 0.206273058 |
| ENSGALG00010019940 | 0.467414401 | 0.136298694 |
| ENSGALG00010019942 | 0.038535107 | 0.148656461 |
| ENSGALG00010019943 | 0.583723844 | 0.426360387 |
| ENSGALG00010019944 | 0.777918554 | 0.517843787 |
| ENSGALG00010019945 | 0.097877284 | 0.350176787 |
| ENSGALG00010019947 | 0.008896856 | 0.297805425 |
| ENSGALG00010019948 | 0.042295127 | 0.087773508 |
| ENSGALG00010019949 | 0.749038177 | 0.358112712 |
| ENSGALG00010019951 | 0.11323327  | 0.255540944 |
| ENSGALG00010019953 | 0.292495439 | 0.090784524 |
| ENSGALG00010019954 | 0.730076384 | 0.205535857 |

|                    |             |             |
|--------------------|-------------|-------------|
| ENSGALG00010019955 | 0.073980033 | 0.247145833 |
| ENSGALG00010019956 | 0.88291556  | 0.62481339  |
| ENSGALG00010019959 | 0.179860993 | 0.179713399 |
| ENSGALG00010019961 | 0.863554948 | 0.34454017  |
| ENSGALG00010019962 | 0.980906027 | 0.277586588 |
| ENSGALG00010019964 | 0.738575175 | 0.258500396 |
| ENSGALG00010019966 | 0.191214941 | 0.24424656  |
| ENSGALG00010019967 | 0.847992536 | 0.291779858 |
| ENSGALG00010019968 | 0.445697602 | 0.219895474 |
| ENSGALG00010019969 | 0.027823108 | 0.310938776 |
| ENSGALG00010019970 | 0.71554899  | 0.295272369 |
| ENSGALG00010019972 | 0.987640654 | 0.261134664 |
| ENSGALG00010019975 | 0.92657394  | 0.355803036 |
| ENSGALG00010019977 | 0.218869449 | 0.316126237 |
| ENSGALG00010019982 | 0.943708716 | 0.30864672  |
| ENSGALG00010019983 | 0.371874213 | 0.063394792 |
| ENSGALG00010019985 | 0.917889152 | 0.287162243 |
| ENSGALG00010019988 | 0.271701261 | 0.072417625 |
| ENSGALG00010019989 | 0.854304846 | 0.195113085 |
| ENSGALG00010019990 | 0.941864853 | 0.297088682 |
| ENSGALG00010019991 | 0.960258004 | 0.269621869 |
| ENSGALG00010019992 | 0.481789544 | 0.752209756 |
| ENSGALG00010019993 | 0.593997736 | 0.08654065  |
| ENSGALG00010019994 | 0.836549704 | 0.495972991 |
| ENSGALG00010019995 | 0.200459704 | 0.179464795 |
| ENSGALG00010019996 | 0.217214742 | 0.068736115 |
| ENSGALG00010019997 | 0.930344015 | 0.227954416 |
| ENSGALG00010019998 | 0.346857435 | 0.15482493  |
| ENSGALG00010019999 | 0.078982618 | 0.158326079 |
| ENSGALG00010020002 | 0.387007219 | 0.32718801  |
| ENSGALG00010020003 | 0.946168379 | 0.370926775 |
| ENSGALG00010020005 | 0.704249373 | 0.425472857 |
| ENSGALG00010020006 | 0.733263125 | 0.332673951 |
| ENSGALG00010020007 | 0.103443347 | 0.338877422 |
| ENSGALG00010020008 | 0.930052829 | 0.152616025 |
| ENSGALG00010020009 | 0.938870862 | 0.228042781 |
| ENSGALG00010020010 | 0.9472898   | 0.293839136 |
| ENSGALG00010020011 | 0.737411417 | 0.250092108 |
| ENSGALG00010020012 | 0.880669974 | 0.403399298 |
| ENSGALG00010020013 | 0.856611092 | 0.090586719 |
| ENSGALG00010020014 | 0.277794258 | 0.110745598 |
| ENSGALG00010020015 | 0.824429256 | 0.258323138 |
| ENSGALG00010020017 | 0.988717082 | 0.312915531 |
| ENSGALG00010020018 | 0.417195075 | 0.438321435 |
| ENSGALG00010020019 | 0.97568914  | 0.310131876 |
| ENSGALG00010020023 | 0.76042559  | 0.12933663  |
| ENSGALG00010020025 | 0.722159626 | 0.382979251 |
| ENSGALG00010020026 | 0.873753111 | 0.393287802 |
| ENSGALG00010020027 | 0.280056159 | 0.177627276 |
| ENSGALG00010020028 | 0.907634415 | 0.196271621 |
| ENSGALG00010020029 | 0.59122585  | 0.159725877 |
| ENSGALG00010020030 | 0.925032016 | 0.274292183 |
| ENSGALG00010020032 | 0.81138571  | 0.330848036 |
| ENSGALG00010020033 | 0.930322987 | 0.451044674 |
| ENSGALG00010020035 | 0.282096614 | 0.332024048 |
| ENSGALG00010020036 | 0.212273854 | 0.161504247 |

|                    |             |             |
|--------------------|-------------|-------------|
| ENSGALG00010020037 | 0.410403324 | 0.131484176 |
| ENSGALG00010020038 | 0.056521171 | 0.029729535 |
| ENSGALG00010020039 | 0.409331554 | 0.235659671 |
| ENSGALG00010020041 | 0.84243441  | 0.389810993 |
| ENSGALG00010020042 | 0.03592601  | 0.44110895  |
| ENSGALG00010020044 | 0.696764186 | 0.460707791 |
| ENSGALG00010020046 | 0.665390152 | 0.026661202 |
| ENSGALG00010020048 | 0.478812278 | 0.359727071 |
| ENSGALG00010020050 | 0.606668492 | 0.458127313 |
| ENSGALG00010020051 | 0.86040396  | 0.541797106 |
| ENSGALG00010020053 | 0.743585277 | 0.468882332 |
| ENSGALG00010020055 | 0.784796562 | 0.279862298 |
| ENSGALG00010020056 | 0.276668027 | 0.140206885 |
| ENSGALG00010020057 | 0.684268013 | 0.231232892 |
| ENSGALG00010020058 | 0.189240572 | 0.04996112  |
| ENSGALG00010020059 | 0.859827806 | 0.321258183 |
| ENSGALG00010020061 | 0.515577418 | 0.157905822 |
| ENSGALG00010020062 | 0.843362421 | 0.119601852 |
| ENSGALG00010020063 | 0.58211732  | 0.156626527 |
| ENSGALG00010020064 | 0.307306451 | 0.282964964 |
| ENSGALG00010020065 | 0.930229292 | 0.225561408 |
| ENSGALG00010020066 | 0.436962567 | 0.059157051 |
| ENSGALG00010020067 | 0.487029626 | 0.057204252 |
| ENSGALG00010020069 | 0.172903936 | 0.107891578 |
| ENSGALG00010020070 | 0.995510706 | 0.314984806 |
| ENSGALG00010020071 | 0.98733594  | 0.31096061  |
| ENSGALG00010020072 | 0.692445445 | 0.369979111 |
| ENSGALG00010020073 | 0.541766033 | 0.138128296 |
| ENSGALG00010020074 | 0.839909611 | 0.124258675 |
| ENSGALG00010020075 | 0.031516128 | 0.030149339 |
| ENSGALG00010020078 | 0.215547553 | 0.055090951 |
| ENSGALG00010020080 | 0.604231815 | 0.096686645 |
| ENSGALG00010020081 | 0.773894541 | 0.120447064 |
| ENSGALG00010020082 | 0.008043983 | 0.110635211 |
| ENSGALG00010020083 | 0.466968707 | 0.077433213 |
| ENSGALG00010020084 | 0.767964559 | 0.088319862 |
| ENSGALG00010020087 | 0.490888107 | 0.426957497 |
| ENSGALG00010020088 | 0.991930919 | 0.341317824 |
| ENSGALG00010020089 | 0.925283398 | 0.276388106 |
| ENSGALG00010020090 | 0.850696325 | 0.102100208 |
| ENSGALG00010020091 | 0.599310847 | 0.258794322 |
| ENSGALG00010020092 | 0.944664945 | 0.318904326 |
| ENSGALG00010020094 | 0.888876998 | 0.425499314 |
| ENSGALG00010020095 | 0.478059971 | 0.457712796 |
| ENSGALG00010020096 | 0.037331804 | 0.156433824 |
| ENSGALG00010020097 | 0.934440206 | 0.267405458 |
| ENSGALG00010020098 | 0.915260184 | 0.182779673 |
| ENSGALG00010020100 | 0.517857661 | 0.230350709 |
| ENSGALG00010020101 | 0.779872011 | 0.237984082 |
| ENSGALG00010020102 | 0.933275149 | 0.377189483 |
| ENSGALG00010020103 | 0.971986878 | 0.261087219 |
| ENSGALG00010020104 | 0.448967064 | 0.321328006 |
| ENSGALG00010020106 | 0.946548268 | 0.316424224 |
| ENSGALG00010020108 | 0.625889071 | 0.08972274  |
| ENSGALG00010020109 | 0.976553569 | 0.364608031 |
| ENSGALG00010020111 | 0.907963185 | 0.397873884 |

|                    |             |             |
|--------------------|-------------|-------------|
| ENSGALG00010020112 | 0.729084255 | 0.248997353 |
| ENSGALG00010020113 | 0.968241435 | 0.419266182 |
| ENSGALG00010020115 | 0.713083852 | 0.3197751   |
| ENSGALG00010020116 | 0.9067651   | 0.154815883 |
| ENSGALG00010020117 | 0.955508017 | 0.318375401 |
| ENSGALG00010020118 | 0.919959502 | 0.297161355 |
| ENSGALG00010020120 | 0.949002965 | 0.289222985 |
| ENSGALG00010020121 | 0.071632426 | 0.114212428 |
| ENSGALG00010020123 | 0.738833228 | 0.029096111 |
| ENSGALG00010020125 | 0.794031035 | 0.279120523 |
| ENSGALG00010020126 | 0.993767231 | 0.372178414 |
| ENSGALG00010020127 | 0.884739269 | 0.395020995 |
| ENSGALG00010020128 | 0.139920369 | 0.086566347 |
| ENSGALG00010020129 | 0.95387847  | 0.280952039 |
| ENSGALG00010020130 | 0.956241471 | 0.345353376 |
| ENSGALG00010020131 | 0.388545176 | 0.174882184 |
| ENSGALG00010020132 | 0.875807163 | 0.227719229 |
| ENSGALG00010020133 | 0.146792371 | 0.169891493 |
| ENSGALG00010020136 | 0.80641198  | 0.234511191 |
| ENSGALG00010020137 | 0.547019104 | 0.072345498 |
| ENSGALG00010020138 | 0.544172866 | 0.336003988 |
| ENSGALG00010020140 | 0.8267718   | 0.282761894 |
| ENSGALG00010020141 | 0.559007683 | 0.48396727  |
| ENSGALG00010020142 | 0.99549528  | 0.311042995 |
| ENSGALG00010020143 | 0.938191913 | 0.260956421 |
| ENSGALG00010020146 | 0.271701261 | 0.072417625 |
| ENSGALG00010020147 | 0.901105971 | 0.291447687 |
| ENSGALG00010020149 | 0.916233433 | 0.187574695 |
| ENSGALG00010020150 | 0.009328574 | 0.083802298 |
| ENSGALG00010020152 | 0.602106283 | 0.000521017 |
| ENSGALG00010020153 | 0.987630688 | 0.29522325  |
| ENSGALG00010020154 | 0.262922434 | 0.138601464 |
| ENSGALG00010020155 | 0.974479059 | 0.391636241 |
| ENSGALG00010020160 | 0.157938721 | 0.144488287 |
| ENSGALG00010020163 | 0.928651962 | 0.357797024 |
| ENSGALG00010020164 | 0.988188776 | 0.33004743  |
| ENSGALG00010020166 | 0.684288517 | 0.320399821 |
| ENSGALG00010020168 | 0.947280091 | 0.362827028 |
| ENSGALG00010020169 | 0.304133466 | 0.450346192 |
| ENSGALG00010020170 | 0.715820585 | 0.288727454 |
| ENSGALG00010020171 | 0.948432439 | 0.329673774 |
| ENSGALG00010020174 | 0.629066859 | 0.22839624  |
| ENSGALG00010020175 | 0.499825406 | 0.277899341 |
| ENSGALG00010020176 | 0.845332307 | 0.120832948 |
| ENSGALG00010020177 | 0.305704808 | 0.008698637 |
| ENSGALG00010020179 | 0.957640255 | 0.407317686 |
| ENSGALG00010020180 | 0.961776901 | 0.362091783 |
| ENSGALG00010020181 | 0.992236103 | 0.407339702 |
| ENSGALG00010020182 | 0.954007002 | 0.322399176 |
| ENSGALG00010020183 | 0.089582073 | 0.120246751 |
| ENSGALG00010020184 | 0.776399382 | 0.289639337 |
| ENSGALG00010020186 | 0.942929866 | 0.448584857 |
| ENSGALG00010020187 | 0.94822787  | 0.305953815 |
| ENSGALG00010020189 | 0.277566769 | 0.107857127 |
| ENSGALG00010020192 | 0.388181886 | 0.168275567 |
| ENSGALG00010020193 | 0.049818185 | 0.170201035 |

|                    |             |             |
|--------------------|-------------|-------------|
| ENSGALG00010020194 | 0.868449347 | 0.100609643 |
| ENSGALG00010020196 | 0.561530937 | 0.030127274 |
| ENSGALG00010020198 | 0.318929676 | 0.136196818 |
| ENSGALG00010020199 | 0.579949033 | 0.241923084 |
| ENSGALG00010020202 | 0.750408666 | 0.179327305 |
| ENSGALG00010020204 | 0.938345656 | 0.294278413 |
| ENSGALG00010020205 | 0.297090418 | 0.136289521 |
| ENSGALG00010020206 | 0.960908734 | 0.282865422 |
| ENSGALG00010020207 | 0.318121149 | 0.063067284 |
| ENSGALG00010020208 | 0.988601461 | 0.395591338 |
| ENSGALG00010020209 | 0.480082909 | 0.111927031 |
| ENSGALG00010020210 | 0.465829381 | 0.191579387 |
| ENSGALG00010020211 | 0.528613725 | 0.244230284 |
| ENSGALG00010020212 | 0.457738473 | 0.089658185 |
| ENSGALG00010020213 | 0.287571043 | 0.097865007 |
| ENSGALG00010020215 | 0.9542151   | 0.304079168 |
| ENSGALG00010020216 | 0.672989678 | 0.019537847 |
| ENSGALG00010020217 | 0.901482736 | 0.329393544 |
| ENSGALG00010020218 | 0.659380756 | 0.322205127 |
| ENSGALG00010020220 | 0.752805333 | 0.278066716 |
| ENSGALG00010020223 | 0.387070339 | 0.105589029 |
| ENSGALG00010020224 | 0.869706154 | 0.37927876  |
| ENSGALG00010020226 | 0.918084877 | 0.306161785 |
| ENSGALG00010020228 | 0.985527861 | 0.319743506 |
| ENSGALG00010020229 | 0.545112016 | 0.168558227 |
| ENSGALG00010020230 | 0.858476851 | 0.361414867 |
| ENSGALG00010020231 | 0.994301755 | 0.334224246 |
| ENSGALG00010020234 | 0.066975135 | 0.131726206 |
| ENSGALG00010020235 | 0.004142612 | 0.369612744 |
| ENSGALG00010020236 | 0.103465014 | 0.394646778 |
| ENSGALG00010020237 | 0.90646765  | 0.259634637 |
| ENSGALG00010020240 | 0.004548546 | 0.260743011 |
| ENSGALG00010020244 | 0.954184444 | 0.20931271  |
| ENSGALG00010020246 | 0.487295094 | 0.151955111 |
| ENSGALG00010020247 | 0.489688642 | 0.142768469 |
| ENSGALG00010020248 | 0.93608277  | 0.280383141 |
| ENSGALG00010020250 | 0.877862036 | 0.090254142 |
| ENSGALG00010020251 | 0.205392353 | 0.048267044 |
| ENSGALG00010020252 | 0.176948081 | 0.188039463 |
| ENSGALG00010020254 | 0.697141454 | 0.112228752 |
| ENSGALG00010020257 | 0.968699266 | 0.29644739  |
| ENSGALG00010020258 | 0.410185387 | 0.15690962  |
| ENSGALG00010020259 | 0.758369745 | 0.031741635 |
| ENSGALG00010020260 | 0.303793964 | 0.471654236 |
| ENSGALG00010020261 | 0.90503726  | 0.335493714 |
| ENSGALG00010020262 | 0.18454997  | 0.160977104 |
| ENSGALG00010020265 | 0.444366257 | 0.233031149 |
| ENSGALG00010020266 | 0.591683149 | 0.438908213 |
| ENSGALG00010020267 | 0.799651782 | 0.437243871 |
| ENSGALG00010020268 | 0.916961219 | 0.252392455 |
| ENSGALG00010020269 | 0.261653625 | 0.225901408 |
| ENSGALG00010020270 | 0.224020725 | 0.161177186 |
| ENSGALG00010020272 | 0.660027856 | 0.152336487 |
| ENSGALG00010020273 | 0.200570274 | 0.091667991 |
| ENSGALG00010020274 | 0.382985366 | 0.1291087   |
| ENSGALG00010020275 | 0.29212014  | 0.404766674 |



|                    |             |             |
|--------------------|-------------|-------------|
| ENSGALG00010020276 | 0.136512308 | 0.205061022 |
| ENSGALG00010020277 | 0.525778537 | 0.164762089 |
| ENSGALG00010020278 | 0.189240572 | 0.04996112  |
| ENSGALG00010020279 | 0.401639624 | 0.101384476 |
| ENSGALG00010020282 | 0.979260861 | 0.319686205 |
| ENSGALG00010020283 | 0.946651791 | 0.298804409 |
| ENSGALG00010020284 | 0.349093479 | 0.169858773 |
| ENSGALG00010020285 | 0.499120598 | 0.069785254 |
| ENSGALG00010020286 | 0.396211517 | 0.126961164 |
| ENSGALG00010020287 | 0.765461697 | 0.441941099 |
| ENSGALG00010020290 | 0.319320077 | 0.024051854 |
| ENSGALG00010020291 | 0.958347801 | 0.329512035 |
| ENSGALG00010020292 | 0.434860708 | 0.100756569 |
| ENSGALG00010020293 | 0.825543496 | 0.176392723 |
| ENSGALG00010020294 | 0.116057914 | 0.149502427 |
| ENSGALG00010020295 | 0.179043696 | 0.046726239 |
| ENSGALG00010020297 | 0.360444497 | 0.098868233 |
| ENSGALG00010020298 | 0.939665823 | 0.279643978 |
| ENSGALG00010020300 | 0.221485348 | 0.180571296 |
| ENSGALG00010020302 | 0.996213389 | 0.336265371 |
| ENSGALG00010020303 | 0.706511058 | 0.41967498  |
| ENSGALG00010020304 | 0.894974301 | 0.264374075 |
| ENSGALG00010020305 | 0.608825599 | 0.531264444 |
| ENSGALG00010020306 | 0.822688596 | 0.287483828 |
| ENSGALG00010020307 | 0.073583463 | 0.3709226   |
| ENSGALG00010020309 | 0.316919054 | 0.259055221 |
| ENSGALG00010020311 | 0.9744157   | 0.269011357 |
| ENSGALG00010020313 | 0.10226259  | 0.270664646 |
| ENSGALG00010020314 | 0.7036622   | 0.033899401 |
| ENSGALG00010020315 | 0.958914663 | 0.354854638 |
| ENSGALG00010020316 | 0.384186114 | 0.249334314 |
| ENSGALG00010020319 | 0.937470555 | 0.391516107 |
| ENSGALG00010020320 | 0.573834299 | 0.092471704 |
| ENSGALG00010020321 | 0.867625476 | 0.343458316 |
| ENSGALG00010020322 | 0.044640162 | 0.167754086 |
| ENSGALG00010020323 | 0.934315017 | 0.331287994 |
| ENSGALG00010020324 | 0.817341214 | 0.230711573 |
| ENSGALG00010020325 | 0.2393273   | 0.222490344 |
| ENSGALG00010020326 | 0.24614705  | 0.19254487  |
| ENSGALG00010020327 | 0.996503057 | 0.351952451 |
| ENSGALG00010020328 | 0.290616396 | 0.103443064 |
| ENSGALG00010020329 | 0.292482362 | 0.359423709 |
| ENSGALG00010020331 | 0.832467751 | 0.030715327 |
| ENSGALG00010020334 | 0.875752366 | 0.28930357  |
| ENSGALG00010020336 | 0.88603643  | 0.325488185 |
| ENSGALG00010020337 | 0.387151135 | 0.264371195 |
| ENSGALG00010020338 | 0.968989051 | 0.248445009 |
| ENSGALG00010020339 | 0.158147761 | 0.13255959  |
| ENSGALG00010020340 | 0.680347823 | 0.289989621 |
| ENSGALG00010020341 | 0.899559999 | 0.141917287 |
| ENSGALG00010020342 | 0.957718898 | 0.359455036 |
| ENSGALG00010020343 | 0.952645749 | 0.284015513 |
| ENSGALG00010020344 | 0.63684563  | 0.028973585 |
| ENSGALG00010020345 | 0.919519258 | 0.373991505 |
| ENSGALG00010020346 | 0.982658457 | 0.30592838  |
| ENSGALG00010020347 | 0.984551353 | 0.406962003 |

|                    |             |             |
|--------------------|-------------|-------------|
| ENSGALG00010020350 | 0.989171446 | 0.336323288 |
| ENSGALG00010020351 | 0.677910474 | 0.498094026 |
| ENSGALG00010020352 | 0.974664507 | 0.292707412 |
| ENSGALG00010020353 | 0.782635951 | 0.071656968 |
| ENSGALG00010020354 | 0.818723244 | 0.018282466 |
| ENSGALG00010020356 | 0.946457071 | 0.318527052 |
| ENSGALG00010020357 | 0.993534897 | 0.305633561 |
| ENSGALG00010020359 | 0.503707307 | 0.365635161 |
| ENSGALG00010020360 | 0.97138188  | 0.32579612  |
| ENSGALG00010020361 | 0.400253218 | 0.132142018 |
| ENSGALG00010020362 | 0.948750567 | 0.252604044 |
| ENSGALG00010020364 | 0.973666524 | 0.313810356 |
| ENSGALG00010020365 | 0.711248135 | 0.136276183 |
| ENSGALG00010020368 | 0.994554293 | 0.344207214 |
| ENSGALG00010020369 | 0.788957252 | 0.184275096 |
| ENSGALG00010020370 | 0.711240541 | 0.098563187 |
| ENSGALG00010020371 | 0.31547063  | 0.309810246 |
| ENSGALG00010020372 | 0.012184093 | 0.540210871 |
| ENSGALG00010020373 | 0.98488434  | 0.286161005 |
| ENSGALG00010020374 | 0.795636289 | 0.152574441 |
| ENSGALG00010020375 | 0.450315715 | 0.108469459 |
| ENSGALG00010020377 | 0.791099214 | 0.14412233  |
| ENSGALG00010020379 | 0.946860467 | 0.264508966 |
| ENSGALG00010020380 | 0.262922434 | 0.138601464 |
| ENSGALG00010020381 | 0.674539653 | 0.190915282 |
| ENSGALG00010020382 | 0.882534286 | 0.376081999 |
| ENSGALG00010020383 | 0.857957252 | 0.231391894 |
| ENSGALG00010020384 | 0.689912718 | 0.07053755  |
| ENSGALG00010020385 | 0.951031534 | 0.368970981 |
| ENSGALG00010020386 | 0.8100781   | 0.176608129 |
| ENSGALG00010020388 | 0.935559933 | 0.391108068 |
| ENSGALG00010020389 | 0.938217365 | 0.235902397 |
| ENSGALG00010020390 | 0.473312807 | 0.314760548 |
| ENSGALG00010020391 | 0.253372503 | 0.032327539 |
| ENSGALG00010020392 | 0.951736191 | 0.491713758 |
| ENSGALG00010020393 | 0.256019099 | 0.216834183 |
| ENSGALG00010020396 | 0.707291406 | 0.438007498 |
| ENSGALG00010020397 | 0.200570274 | 0.091667991 |
| ENSGALG00010020399 | 0.920779815 | 0.32458969  |
| ENSGALG00010020400 | 0.449842243 | 0.880367635 |
| ENSGALG00010020402 | 0.939354813 | 0.342820024 |
| ENSGALG00010020405 | 0.579190936 | 0.058075035 |
| ENSGALG00010020407 | 0.075248743 | 0.102913545 |
| ENSGALG00010020408 | 0.495916114 | 0.179082398 |
| ENSGALG00010020410 | 0.203309254 | 0.296023659 |
| ENSGALG00010020411 | 0.055172705 | 0.149124272 |
| ENSGALG00010020412 | 0.587058424 | 0.051759982 |
| ENSGALG00010020413 | 0.509235349 | 0.036591239 |
| ENSGALG00010020414 | 0.255766848 | 0.224447046 |
| ENSGALG00010020415 | 0.730206753 | 0.169915086 |
| ENSGALG00010020417 | 0.887924591 | 0.403302773 |
| ENSGALG00010020418 | 0.349432482 | 0.011755753 |
| ENSGALG00010020419 | 0.383103953 | 0.01627307  |
| ENSGALG00010020420 | 0.891676166 | 0.372534867 |
| ENSGALG00010020421 | 0.494148056 | 0.064369836 |
| ENSGALG00010020422 | 0.24254036  | 0.086944743 |

|                    |             |             |
|--------------------|-------------|-------------|
| ENSGALG00010020427 | 0.41296042  | 0.806690559 |
| ENSGALG00010020428 | 0.400184835 | 0.084575054 |
| ENSGALG00010020429 | 0.71876846  | 0.39042322  |
| ENSGALG00010020430 | 0.420431013 | 0.707899194 |
| ENSGALG00010020432 | 0.386375828 | 0.172117916 |
| ENSGALG00010020433 | 0.681693441 | 0.346836297 |
| ENSGALG00010020434 | 0.615740126 | 0.2849496   |
| ENSGALG00010020436 | 0.761128607 | 0.063695792 |
| ENSGALG00010020437 | 0.707864496 | 0.28829985  |
| ENSGALG00010020438 | 0.919103171 | 0.264253744 |
| ENSGALG00010020439 | 0.277566769 | 0.107857127 |
| ENSGALG00010020440 | 0.978050674 | 0.350687461 |
| ENSGALG00010020441 | 0.743938086 | 0.420616735 |
| ENSGALG00010020442 | 0.682971434 | 0.327743641 |
| ENSGALG00010020443 | 0.422106722 | 0.136384099 |
| ENSGALG00010020445 | 0.873063824 | 0.354453937 |
| ENSGALG00010020446 | 0.121099407 | 0.267700667 |
| ENSGALG00010020447 | 0.45948101  | 0.229067773 |
| ENSGALG00010020448 | 0.121055082 | 0.149905879 |
| ENSGALG00010020449 | 0.928704229 | 0.3648326   |
| ENSGALG00010020450 | 0.871059902 | 0.263540938 |
| ENSGALG00010020451 | 0.090602943 | 0.026032714 |
| ENSGALG00010020452 | 0.721740863 | 0.289362654 |
| ENSGALG00010020453 | 0.81908753  | 0.487437521 |
| ENSGALG00010020454 | 0.862858465 | 0.483983261 |
| ENSGALG00010020455 | 0.956626403 | 0.323724769 |
| ENSGALG00010020457 | 0.488782136 | 0.091882936 |
| ENSGALG00010020459 | 0.652430022 | 0.199761189 |
| ENSGALG00010020460 | 0.462075186 | 0.277406906 |
| ENSGALG00010020461 | 0.78587489  | 0.25121653  |
| ENSGALG00010020462 | 0.316983401 | 0.11751522  |
| ENSGALG00010020463 | 0.187514554 | 0.108479243 |
| ENSGALG00010020465 | 0.917161163 | 0.328750242 |
| ENSGALG00010020467 | 0.068177567 | 0.142182378 |
| ENSGALG00010020468 | 0.901709005 | 0.301534187 |
| ENSGALG00010020469 | 0.886813364 | 0.319630359 |
| ENSGALG00010020470 | 0.337009149 | 0.19622042  |
| ENSGALG00010020472 | 0.478700858 | 0.154815381 |
| ENSGALG00010020473 | 0.963221253 | 0.311346287 |
| ENSGALG00010020474 | 0.324368703 | 0.149815344 |
| ENSGALG00010020475 | 0.114287061 | 0.131886953 |
| ENSGALG00010020476 | 0.724611528 | 0.23610225  |
| ENSGALG00010020478 | 0.940320863 | 0.338775799 |
| ENSGALG00010020479 | 0.369780764 | 0.1127516   |
| ENSGALG00010020480 | 0.201101128 | 0.166332235 |
| ENSGALG00010020481 | 0.897132241 | 0.342851435 |
| ENSGALG00010020482 | 0.208550923 | 0.676301294 |
| ENSGALG00010020484 | 0.905086219 | 0.166792425 |
| ENSGALG00010020485 | 0.726186731 | 0.471397572 |
| ENSGALG00010020486 | 0.050645232 | 0.152289163 |
| ENSGALG00010020488 | 0.208550923 | 0.676301294 |
| ENSGALG00010020489 | 0.455898289 | 0.021567847 |
| ENSGALG00010020491 | 0.609951877 | 0.287986821 |
| ENSGALG00010020493 | 0.942582385 | 0.351532723 |
| ENSGALG00010020497 | 0.972798341 | 0.308215589 |
| ENSGALG00010020498 | 0.912180971 | 0.319596426 |

|                    |             |             |
|--------------------|-------------|-------------|
| ENSGALG00010020500 | 0.064519051 | 0.143619078 |
| ENSGALG00010020501 | 0.476493638 | 0.163642365 |
| ENSGALG00010020507 | 0.963914694 | 0.339621005 |
| ENSGALG00010020509 | 0.764781875 | 0.093175426 |
| ENSGALG00010020510 | 0.417145881 | 0.03944592  |
| ENSGALG00010020513 | 0.509290079 | 0.261262817 |
| ENSGALG00010020514 | 0.26536627  | 0.210350919 |
| ENSGALG00010020516 | 0.839478048 | 0.317581957 |
| ENSGALG00010020517 | 0.808244003 | 0.303456432 |
| ENSGALG00010020519 | 0.341637029 | 0.127743113 |
| ENSGALG00010020520 | 0.853064942 | 0.459256374 |
| ENSGALG00010020521 | 0.888122685 | 0.377377191 |
| ENSGALG00010020522 | 0.922058643 | 0.31168468  |
| ENSGALG00010020524 | 0.325349187 | 0.290512841 |
| ENSGALG00010020525 | 0.991377857 | 0.33024993  |
| ENSGALG00010020526 | 0.489827757 | 0.225686727 |
| ENSGALG00010020530 | 0.952047621 | 0.385926679 |
| ENSGALG00010020533 | 0.866168448 | 0.298942091 |
| ENSGALG00010020534 | 0.514392207 | 0.178555385 |
| ENSGALG00010020535 | 0.92687953  | 0.328825069 |
| ENSGALG00010020537 | 0.710435459 | 0.344800277 |
| ENSGALG00010020538 | 0.757140355 | 0.235576216 |
| ENSGALG00010020539 | 0.383913097 | 0.180221586 |
| ENSGALG00010020540 | 0.751088457 | 0.147475828 |
| ENSGALG00010020542 | 0.501827259 | 0.171775072 |
| ENSGALG00010020544 | 0.976743382 | 0.362900393 |
| ENSGALG00010020545 | 0.953231448 | 0.301430741 |
| ENSGALG00010020546 | 0.980910205 | 0.322605762 |
| ENSGALG00010020547 | 0.285272007 | 0.109169955 |
| ENSGALG00010020548 | 0.874476467 | 0.358901663 |
| ENSGALG00010020550 | 0.754658998 | 0.189305589 |
| ENSGALG00010020554 | 0.671275217 | 0.162691826 |
| ENSGALG00010020556 | 0.778256928 | 0.118953508 |
| ENSGALG00010020557 | 0.963236059 | 0.328272996 |
| ENSGALG00010020558 | 0.985405919 | 0.267712358 |
| ENSGALG00010020559 | 0.767056618 | 0.270121799 |
| ENSGALG00010020560 | 0.314520251 | 0.081504091 |
| ENSGALG00010020561 | 0.778581377 | 0.347910667 |
| ENSGALG00010020562 | 0.900728202 | 0.177059341 |
| ENSGALG00010020563 | 0.410235727 | 0.491862739 |
| ENSGALG00010020564 | 0.817797576 | 0.37153093  |
| ENSGALG00010020565 | 0.682530937 | 0.170765948 |
| ENSGALG00010020568 | 0.944117345 | 0.357497814 |
| ENSGALG00010020569 | 0.969122506 | 0.323595003 |
| ENSGALG00010020570 | 0.060268175 | 0.168077398 |
| ENSGALG00010020571 | 0.981251775 | 0.260015671 |
| ENSGALG00010020572 | 0.795798891 | 0.335985589 |
| ENSGALG00010020573 | 0.592330361 | 0.217084871 |
| ENSGALG00010020574 | 0.572547474 | 0.507567    |
| ENSGALG00010020575 | 0.748818935 | 0.413120295 |
| ENSGALG00010020576 | 0.988599929 | 0.312339366 |
| ENSGALG00010020577 | 0.004887549 | 0.04546436  |
| ENSGALG00010020578 | 0.742411644 | 0.290116055 |
| ENSGALG00010020579 | 0.421600795 | 0.168736327 |
| ENSGALG00010020580 | 0.38511333  | 0.256177352 |
| ENSGALG00010020581 | 0.745999508 | 0.23900349  |

|                    |             |             |
|--------------------|-------------|-------------|
| ENSGALG00010020582 | 0.983775112 | 0.315178108 |
| ENSGALG00010020583 | 0.678445138 | 0.24356165  |
| ENSGALG00010020584 | 0.92602171  | 0.376811096 |
| ENSGALG00010020585 | 0.290122505 | 0.464993379 |
| ENSGALG00010020586 | 0.269503727 | 0.383637442 |
| ENSGALG00010020587 | 0.603056842 | 0.268516678 |
| ENSGALG00010020588 | 0.976247421 | 0.382201372 |
| ENSGALG00010020590 | 0.86821197  | 0.127117406 |
| ENSGALG00010020591 | 0.70482047  | 0.327324576 |
| ENSGALG00010020592 | 0.914473359 | 0.307967632 |
| ENSGALG00010020593 | 0.690119443 | 0.336310208 |
| ENSGALG00010020594 | 0.905089303 | 0.273401166 |
| ENSGALG00010020595 | 0.57493456  | 0.060471239 |
| ENSGALG00010020596 | 0.308097187 | 0.310428988 |
| ENSGALG00010020597 | 0.408114531 | 0.113315477 |
| ENSGALG00010020598 | 0.481124533 | 0.17287833  |
| ENSGALG00010020599 | 0.960248444 | 0.263144592 |
| ENSGALG00010020600 | 0.968858557 | 0.362270085 |
| ENSGALG00010020601 | 0.375699607 | 0.182609349 |
| ENSGALG00010020602 | 0.978818149 | 0.348975324 |
| ENSGALG00010020603 | 0.039735217 | 0.00817848  |
| ENSGALG00010020604 | 0.958809139 | 0.381503866 |
| ENSGALG00010020605 | 0.874257857 | 0.324358444 |
| ENSGALG00010020606 | 0.270451009 | 0.090541667 |
| ENSGALG00010020607 | 0.777509399 | 0.126196597 |
| ENSGALG00010020608 | 0.991669579 | 0.281747639 |
| ENSGALG00010020609 | 0.020659512 | 0.201787801 |
| ENSGALG00010020610 | 0.375927362 | 0.072713138 |
| ENSGALG00010020611 | 0.980985627 | 0.335134889 |
| ENSGALG00010020612 | 0.851811717 | 0.28780543  |
| ENSGALG00010020613 | 0.213204188 | 0.253729922 |
| ENSGALG00010020614 | 0.922600038 | 0.345002588 |
| ENSGALG00010020615 | 0.892948425 | 0.298715329 |
| ENSGALG00010020616 | 0.792927161 | 0.174608427 |
| ENSGALG00010020617 | 0.553887071 | 0.144149795 |
| ENSGALG00010020618 | 0.956553601 | 0.18648785  |
| ENSGALG00010020619 | 0.95413562  | 0.236892657 |
| ENSGALG00010020620 | 0.099841857 | 0.210681669 |
| ENSGALG00010020621 | 0.815047886 | 0.286409037 |
| ENSGALG00010020622 | 0.968154354 | 0.309313587 |
| ENSGALG00010020623 | 0.546846383 | 0.319762739 |
| ENSGALG00010020624 | 0.96786482  | 0.322454164 |
| ENSGALG00010020625 | 0.992231475 | 0.297038744 |
| ENSGALG00010020626 | 0.55117692  | 0.529721626 |
| ENSGALG00010020628 | 0.116087723 | 0.034760228 |
| ENSGALG00010020629 | 0.184177001 | 0.381409633 |
| ENSGALG00010020630 | 0.914467364 | 0.373977361 |
| ENSGALG00010020632 | 0.917017626 | 0.126661379 |
| ENSGALG00010020633 | 0.155915113 | 0.433989127 |
| ENSGALG00010020634 | 0.123711406 | 0.412306205 |
| ENSGALG00010020635 | 0.894961069 | 0.312459291 |
| ENSGALG00010020636 | 0.951136639 | 0.386214095 |
| ENSGALG00010020637 | 0.322358098 | 0.049764011 |
| ENSGALG00010020638 | 0.986591013 | 0.344884596 |
| ENSGALG00010020640 | 0.746659661 | 0.243607547 |
| ENSGALG00010020641 | 0.390688024 | 0.154376612 |

|                    |             |             |
|--------------------|-------------|-------------|
| ENSGALG00010020642 | 0.718248245 | 0.306968442 |
| ENSGALG00010020643 | 0.044955329 | 0.304961216 |
| ENSGALG00010020644 | 0.200570274 | 0.091667991 |
| ENSGALG00010020645 | 0.3370502   | 0.133259151 |
| ENSGALG00010020646 | 0.776706201 | 0.263331159 |
| ENSGALG00010020647 | 0.638671809 | 0.648426078 |
| ENSGALG00010020648 | 0.858100571 | 0.352133078 |
| ENSGALG00010020649 | 0.961045661 | 0.231735211 |
| ENSGALG00010020650 | 0.886587911 | 0.265219615 |
| ENSGALG00010020651 | 0.76246313  | 0.014323299 |
| ENSGALG00010020652 | 0.636058693 | 0.466203476 |
| ENSGALG00010020653 | 0.940296383 | 0.297408915 |
| ENSGALG00010020654 | 0.338453547 | 0.383259594 |
| ENSGALG00010020655 | 0.481663103 | 0.0475525   |
| ENSGALG00010020657 | 0.883257637 | 0.172358994 |
| ENSGALG00010020658 | 0.887708926 | 0.346018357 |
| ENSGALG00010020659 | 0.886096834 | 0.442405396 |
| ENSGALG00010020660 | 0.595486125 | 0.195240614 |
| ENSGALG00010020662 | 0.923919423 | 0.292125295 |
| ENSGALG00010020663 | 0.252637566 | 0.305424595 |
| ENSGALG00010020664 | 0.555622921 | 0.171124523 |
| ENSGALG00010020665 | 0.582687075 | 0.199697713 |
| ENSGALG00010020666 | 0.691288674 | 0.189763308 |
| ENSGALG00010020667 | 0.596531208 | 0.092646998 |
| ENSGALG00010020668 | 0.466317853 | 0.337985432 |
| ENSGALG00010020669 | 0.736224633 | 0.320743243 |
| ENSGALG00010020670 | 0.357803227 | 0.160665132 |
| ENSGALG00010020671 | 0.281348506 | 0.111358441 |
| ENSGALG00010020672 | 0.694063467 | 0.070495835 |
| ENSGALG00010020673 | 0.469603526 | 0.211873123 |
| ENSGALG00010020675 | 0.968110656 | 0.373559859 |
| ENSGALG00010020676 | 0.991237741 | 0.349262765 |
| ENSGALG00010020677 | 0.3112811   | 0.088460727 |
| ENSGALG00010020678 | 0.552279388 | 0.224606277 |
| ENSGALG00010020679 | 0.864511251 | 0.247631834 |
| ENSGALG00010020680 | 0.488638928 | 0.284647358 |
| ENSGALG00010020681 | 0.784707411 | 0.350995972 |
| ENSGALG00010020682 | 0.180808184 | 0.323375394 |
| ENSGALG00010020684 | 0.215007606 | 0.046290421 |
| ENSGALG00010020685 | 0.884414921 | 0.279184649 |
| ENSGALG00010020686 | 0.787869223 | 0.240500272 |
| ENSGALG00010020689 | 0.341484671 | 0.405588297 |
| ENSGALG00010020690 | 0.193228965 | 0.297822659 |
| ENSGALG00010020691 | 0.962226561 | 0.329266192 |
| ENSGALG00010020692 | 0.846477431 | 0.440220051 |
| ENSGALG00010020693 | 0.051306891 | 0.024134752 |
| ENSGALG00010020694 | 0.586621357 | 0.055892992 |
| ENSGALG00010020695 | 0.268465557 | 0.010121625 |
| ENSGALG00010020696 | 0.890725633 | 0.271982527 |
| ENSGALG00010020697 | 0.278765262 | 0.561539442 |
| ENSGALG00010020698 | 0.616891431 | 0.16351448  |
| ENSGALG00010020699 | 0.930513288 | 0.277049639 |
| ENSGALG00010020700 | 0.967185337 | 0.29712803  |
| ENSGALG00010020701 | 0.943056699 | 0.36198063  |
| ENSGALG00010020702 | 0.185500048 | 0.211168809 |
| ENSGALG00010020704 | 0.982100966 | 0.32946532  |

|                    |             |             |
|--------------------|-------------|-------------|
| ENSGALG00010020705 | 0.974791316 | 0.333409929 |
| ENSGALG00010020706 | 0.909822225 | 0.486994214 |
| ENSGALG00010020707 | 0.967072377 | 0.285795557 |
| ENSGALG00010020708 | 0.247410978 | 0.125394905 |
| ENSGALG00010020709 | 0.893906014 | 0.312636614 |
| ENSGALG00010020711 | 0.948157883 | 0.343590262 |
| ENSGALG00010020712 | 0.941889272 | 0.366685719 |
| ENSGALG00010020713 | 0.941536463 | 0.337071032 |
| ENSGALG00010020714 | 0.996503184 | 0.35503628  |
| ENSGALG00010020715 | 0.894264602 | 0.448888572 |
| ENSGALG00010020716 | 0.935103864 | 0.270535501 |
| ENSGALG00010020717 | 0.459285249 | 0.136630132 |
| ENSGALG00010020718 | 0.792043998 | 0.340400786 |
| ENSGALG00010020719 | 0.778842421 | 0.322684913 |
| ENSGALG00010020720 | 0.974496187 | 0.378066573 |
| ENSGALG00010020721 | 0.410899696 | 0.452255136 |
| ENSGALG00010020723 | 0.920108523 | 0.308010623 |
| ENSGALG00010020724 | 0.43009708  | 0.077028092 |
| ENSGALG00010020725 | 0.618466543 | 0.176924127 |
| ENSGALG00010020726 | 0.541780325 | 0.192305211 |
| ENSGALG00010020727 | 0.984211736 | 0.295950318 |
| ENSGALG00010020728 | 0.863449701 | 0.340198219 |
| ENSGALG00010020729 | 0.327392726 | 0.342589916 |
| ENSGALG00010020730 | 0.995729976 | 0.359316109 |
| ENSGALG00010020731 | 0.559301295 | 0.274132423 |
| ENSGALG00010020732 | 0.985526912 | 0.323502023 |
| ENSGALG00010020733 | 0.990932981 | 0.39161896  |
| ENSGALG00010020734 | 0.995857443 | 0.336232846 |
| ENSGALG00010020735 | 0.871052727 | 0.343644104 |
| ENSGALG00010020736 | 0.487292843 | 0.092080489 |
| ENSGALG00010020737 | 0.598876456 | 0.131356243 |
| ENSGALG00010020738 | 0.306269874 | 0.488490028 |
| ENSGALG00010020739 | 0.879045607 | 0.298849044 |
| ENSGALG00010020741 | 0.941974405 | 0.389983449 |
| ENSGALG00010020742 | 0.196511741 | 0.117092107 |
| ENSGALG00010020743 | 0.857413243 | 0.369702998 |
| ENSGALG00010020744 | 0.600821133 | 0.228499379 |
| ENSGALG00010020745 | 0.887355398 | 0.218267221 |
| ENSGALG00010020746 | 0.582131949 | 0.168287701 |
| ENSGALG00010020747 | 0.915334277 | 0.293170466 |
| ENSGALG00010020748 | 0.830312444 | 0.275370539 |
| ENSGALG00010020749 | 0.154167952 | 0.472083635 |
| ENSGALG00010020750 | 0.399427869 | 0.208545082 |
| ENSGALG00010020752 | 0.624685222 | 0.033647005 |
| ENSGALG00010020753 | 0.829815168 | 0.207128509 |
| ENSGALG00010020754 | 0.946000873 | 0.426279773 |
| ENSGALG00010020755 | 0.754024641 | 0.162560877 |
| ENSGALG00010020756 | 0.271626977 | 0.127748201 |
| ENSGALG00010020758 | 0.294909804 | 0.0629881   |
| ENSGALG00010020759 | 0.21496372  | 0.036745329 |
| ENSGALG00010020760 | 0.957149002 | 0.345848081 |
| ENSGALG00010020762 | 0.547710349 | 0.16109788  |
| ENSGALG00010020763 | 0.468132971 | 0.278535379 |
| ENSGALG00010020764 | 0.982921788 | 0.282694651 |
| ENSGALG00010020765 | 0.956028114 | 0.349358418 |
| ENSGALG00010020766 | 0.797305075 | 0.341124992 |

|                    |             |             |
|--------------------|-------------|-------------|
| ENSGALG00010020767 | 0.968886756 | 0.298083183 |
| ENSGALG00010020769 | 0.407281254 | 0.337026701 |
| ENSGALG00010020770 | 0.769041059 | 0.305033639 |
| ENSGALG00010020771 | 0.988681991 | 0.329909162 |
| ENSGALG00010020772 | 0.044800328 | 0.15752141  |
| ENSGALG00010020773 | 0.978671904 | 0.344461834 |
| ENSGALG00010020774 | 0.002808211 | 0.318497366 |
| ENSGALG00010020775 | 0.814281533 | 0.259232971 |
| ENSGALG00010020776 | 0.741794208 | 0.247639585 |
| ENSGALG00010020777 | 0.445286975 | 0.158165284 |
| ENSGALG00010020778 | 0.881277495 | 0.294482977 |
| ENSGALG00010020779 | 0.434601125 | 0.383146991 |
| ENSGALG00010020780 | 0.237246509 | 0.183928226 |
| ENSGALG00010020781 | 0.95704372  | 0.393869253 |
| ENSGALG00010020782 | 0.973510224 | 0.342797266 |
| ENSGALG00010020783 | 0.398964639 | 0.068333442 |
| ENSGALG00010020784 | 0.483803411 | 0.002859434 |
| ENSGALG00010020786 | 0.917066274 | 0.268081021 |
| ENSGALG00010020787 | 0.686944969 | 0.476037482 |
| ENSGALG00010020789 | 0.019377489 | 0.195136276 |
| ENSGALG00010020790 | 0.885542203 | 0.358951499 |
| ENSGALG00010020791 | 0.397516991 | 0.125566479 |
| ENSGALG00010020792 | 0.571395579 | 0.036659766 |
| ENSGALG00010020793 | 0.127328431 | 0.511200971 |
| ENSGALG00010020794 | 0.975721881 | 0.387913674 |
| ENSGALG00010020795 | 0.331669341 | 0.196143555 |
| ENSGALG00010020796 | 0.504401928 | 0.30445242  |
| ENSGALG00010020797 | 0.86175939  | 0.161965103 |
| ENSGALG00010020798 | 0.611262508 | 0.005356014 |
| ENSGALG00010020799 | 0.296984403 | 0.336871547 |
| ENSGALG00010020800 | 0.372757682 | 0.112441993 |
| ENSGALG00010020802 | 0.186136844 | 0.268763825 |
| ENSGALG00010020803 | 0.986048145 | 0.358063292 |
| ENSGALG00010020804 | 0.945034336 | 0.298668343 |
| ENSGALG00010020806 | 0.793400146 | 0.186192634 |
| ENSGALG00010020808 | 0.238485933 | 0.201823685 |
| ENSGALG00010020809 | 0.993868773 | 0.330467937 |
| ENSGALG00010020810 | 0.93692646  | 0.296275723 |
| ENSGALG00010020811 | 0.993924841 | 0.267399461 |
| ENSGALG00010020813 | 0.119508885 | 0.430755897 |
| ENSGALG00010020816 | 0.883163545 | 0.29800357  |
| ENSGALG00010020818 | 0.905601522 | 0.086200595 |
| ENSGALG00010020819 | 0.370951809 | 0.117490575 |
| ENSGALG00010020820 | 0.714101558 | 0.053407554 |
| ENSGALG00010020822 | 0.745017789 | 0.198556494 |
| ENSGALG00010020824 | 0.597126524 | 0.095740434 |
| ENSGALG00010020825 | 0.915185197 | 0.293723345 |
| ENSGALG00010020826 | 0.893103763 | 0.306692709 |
| ENSGALG00010020827 | 0.952905769 | 0.225711159 |
| ENSGALG00010020828 | 0.358340038 | 0.218603587 |
| ENSGALG00010020829 | 0.92792625  | 0.26190552  |
| ENSGALG00010020830 | 0.965698896 | 0.289314749 |
| ENSGALG00010020831 | 0.932685071 | 0.300801763 |
| ENSGALG00010020832 | 0.407452051 | 0.243070492 |
| ENSGALG00010020833 | 0.7905035   | 0.321560206 |
| ENSGALG00010020835 | 0.898555596 | 0.381041046 |



|                    |             |             |
|--------------------|-------------|-------------|
| ENSGALG00010020838 | 0.850442079 | 0.307333819 |
| ENSGALG00010020839 | 0.8504118   | 0.26362143  |
| ENSGALG00010020840 | 0.945602006 | 0.320729502 |
| ENSGALG00010020842 | 0.262922434 | 0.138601464 |
| ENSGALG00010020843 | 0.937044668 | 0.49878054  |
| ENSGALG00010020844 | 0.156767252 | 0.165521014 |
| ENSGALG00010020845 | 0.146524323 | 0.151387256 |
| ENSGALG00010020846 | 0.491540463 | 0.126862234 |
| ENSGALG00010020847 | 0.636854656 | 0.197528793 |
| ENSGALG00010020848 | 0.225836681 | 0.217082097 |
| ENSGALG00010020850 | 0.161330889 | 0.128849645 |
| ENSGALG00010020852 | 0.270451009 | 0.090541667 |
| ENSGALG00010020854 | 0.988669325 | 0.32502654  |
| ENSGALG00010020855 | 0.844741431 | 0.428334638 |
| ENSGALG00010020860 | 0.351096783 | 0.165551313 |
| ENSGALG00010020861 | 0.963250979 | 0.332821937 |
| ENSGALG00010020862 | 0.266521434 | 0.312856314 |
| ENSGALG00010020863 | 0.227888411 | 0.173427787 |
| ENSGALG00010020864 | 0.358813744 | 0.197864007 |
| ENSGALG00010020865 | 0.565625586 | 0.33598432  |
| ENSGALG00010020866 | 0.753331692 | 0.241184258 |
| ENSGALG00010020867 | 0.224008667 | 0.143568574 |
| ENSGALG00010020868 | 0.060562387 | 0.06174965  |
| ENSGALG00010020869 | 0.396668506 | 0.181671381 |
| ENSGALG00010020870 | 0.962495104 | 0.390638316 |
| ENSGALG00010020871 | 0.693818916 | 0.210155422 |
| ENSGALG00010020872 | 0.368720526 | 0.277125447 |
| ENSGALG00010020873 | 0.980047239 | 0.280417526 |
| ENSGALG00010020875 | 0.988870374 | 0.319309522 |
| ENSGALG00010020877 | 0.814139662 | 0.181176778 |
| ENSGALG00010020878 | 0.646360667 | 0.123885799 |
| ENSGALG00010020879 | 0.869858387 | 0.277400699 |
| ENSGALG00010020880 | 0.113642075 | 0.088679342 |
| ENSGALG00010020882 | 0.033024477 | 0.241212674 |
| ENSGALG00010020883 | 0.342798517 | 0.150343339 |
| ENSGALG00010020885 | 0.323046176 | 0.318166017 |
| ENSGALG00010020886 | 0.359175204 | 0.300173877 |
| ENSGALG00010020887 | 0.382370486 | 0.096472474 |
| ENSGALG00010020889 | 0.82731135  | 0.200105974 |
| ENSGALG00010020890 | 0.743518262 | 0.253551097 |
| ENSGALG00010020893 | 0.366356945 | 0.080496265 |
| ENSGALG00010020894 | 0.916290833 | 0.339769199 |
| ENSGALG00010020895 | 0.701540713 | 0.528393939 |
| ENSGALG00010020896 | 0.967485767 | 0.232461823 |
| ENSGALG00010020897 | 0.41296042  | 0.806690559 |
| ENSGALG00010020898 | 0.761189854 | 0.125509903 |
| ENSGALG00010020899 | 0.266137114 | 0.107784983 |
| ENSGALG00010020900 | 0.673523001 | 0.146493161 |
| ENSGALG00010020901 | 0.090108996 | 0.186196746 |
| ENSGALG00010020902 | 0.235505015 | 0.175050375 |
| ENSGALG00010020903 | 0.965543958 | 0.269561909 |
| ENSGALG00010020904 | 0.289607518 | 0.919337459 |
| ENSGALG00010020905 | 0.889074716 | 0.25085926  |
| ENSGALG00010020906 | 0.752091177 | 0.252366577 |
| ENSGALG00010020908 | 0.903411798 | 0.263279578 |
| ENSGALG00010020909 | 0.400215036 | 0.132215663 |

|                    |             |             |
|--------------------|-------------|-------------|
| ENSGALG00010020912 | 0.42166784  | 0.088901208 |
| ENSGALG00010020913 | 0.774835182 | 0.010596332 |
| ENSGALG00010020915 | 0.072999106 | 0.13664561  |
| ENSGALG00010020916 | 0.961456248 | 0.257140988 |
| ENSGALG00010020917 | 0.283513089 | 0.60631955  |
| ENSGALG00010020918 | 0.598561102 | 0.016828313 |
| ENSGALG00010020920 | 0.884661618 | 0.137527911 |
| ENSGALG00010020921 | 0.031164765 | 0.03301008  |
| ENSGALG00010020922 | 0.988180665 | 0.359186876 |
| ENSGALG00010020923 | 0.003611467 | 0.115041207 |
| ENSGALG00010020924 | 0.85675648  | 0.438769316 |
| ENSGALG00010020925 | 0.974684492 | 0.358500821 |
| ENSGALG00010020926 | 0.031576253 | 0.123183528 |
| ENSGALG00010020927 | 0.110539129 | 0.188098904 |
| ENSGALG00010020928 | 0.558778746 | 0.133983178 |
| ENSGALG00010020929 | 0.098051802 | 0.175743111 |
| ENSGALG00010020932 | 0.971065742 | 0.280632118 |
| ENSGALG00010020933 | 0.989693103 | 0.304890737 |
| ENSGALG00010020934 | 0.985324088 | 0.34981691  |
| ENSGALG00010020935 | 0.949267271 | 0.267976972 |
| ENSGALG00010020936 | 0.870648891 | 0.192278104 |
| ENSGALG00010020937 | 0.967212817 | 0.189181241 |
| ENSGALG00010020938 | 0.330508564 | 0.019587901 |
| ENSGALG00010020940 | 0.739006674 | 0.483107047 |
| ENSGALG00010020941 | 0.954632934 | 0.379112871 |
| ENSGALG00010020943 | 0.966694214 | 0.378098982 |
| ENSGALG00010020944 | 0.976960125 | 0.271123346 |
| ENSGALG00010020945 | 0.980658749 | 0.327218125 |
| ENSGALG00010020946 | 0.947773051 | 0.254808446 |
| ENSGALG00010020947 | 0.802096747 | 0.159296138 |
| ENSGALG00010020948 | 0.311289807 | 0.13851383  |
| ENSGALG00010020949 | 0.519909436 | 0.297684865 |
| ENSGALG00010020950 | 0.384309334 | 0.121080256 |
| ENSGALG00010020951 | 0.689811566 | 0.359726938 |
| ENSGALG00010020952 | 0.968858164 | 0.366422786 |
| ENSGALG00010020953 | 0.240091936 | 0.158881448 |
| ENSGALG00010020954 | 0.792065607 | 0.260342909 |
| ENSGALG00010020955 | 0.742383644 | 0.326145834 |
| ENSGALG00010020956 | 0.15137346  | 0.072214025 |
| ENSGALG00010020957 | 0.719198105 | 0.300187993 |
| ENSGALG00010020958 | 0.935409825 | 0.323010417 |
| ENSGALG00010020959 | 0.717076954 | 0.466373821 |
| ENSGALG00010020960 | 0.919724948 | 0.119790263 |
| ENSGALG00010020961 | 0.210120672 | 0.383689609 |
| ENSGALG00010020962 | 0.845599687 | 0.464827035 |
| ENSGALG00010020963 | 0.760371254 | 0.139104511 |
| ENSGALG00010020965 | 0.746348502 | 0.152959554 |
| ENSGALG00010020966 | 0.9574516   | 0.294893142 |
| ENSGALG00010020967 | 0.744780435 | 0.49751561  |
| ENSGALG00010020968 | 0.339444113 | 0.045741665 |
| ENSGALG00010020969 | 0.951415482 | 0.361574336 |
| ENSGALG00010020970 | 0.952658003 | 0.329020975 |
| ENSGALG00010020971 | 0.985728336 | 0.270035797 |
| ENSGALG00010020972 | 0.089565001 | 0.154445367 |
| ENSGALG00010020973 | 0.443536048 | 0.009782871 |
| ENSGALG00010020974 | 0.271270171 | 0.107578172 |

|                    |             |             |
|--------------------|-------------|-------------|
| ENSGALG00010020975 | 0.881476277 | 0.321961424 |
| ENSGALG00010020976 | 0.143162467 | 0.192206689 |
| ENSGALG00010020977 | 0.065713322 | 0.261555779 |
| ENSGALG00010020978 | 0.905771409 | 0.291010675 |
| ENSGALG00010020979 | 0.537515473 | 0.05670132  |
| ENSGALG00010020980 | 0.342463317 | 0.142361432 |
| ENSGALG00010020981 | 0.246404875 | 0.138114697 |
| ENSGALG00010020982 | 0.612150895 | 0.280045213 |
| ENSGALG00010020983 | 0.043904895 | 0.157504155 |
| ENSGALG00010020984 | 0.981201042 | 0.281620924 |
| ENSGALG00010020985 | 0.082866238 | 0.086007567 |
| ENSGALG00010020986 | 0.776543276 | 0.093734882 |
| ENSGALG00010020987 | 0.912795484 | 0.35449441  |
| ENSGALG00010020988 | 0.880125963 | 0.103992011 |
| ENSGALG00010020989 | 0.913449815 | 0.276388003 |
| ENSGALG00010020990 | 0.583496902 | 0.427948511 |
| ENSGALG00010020991 | 0.621378995 | 0.156899063 |
| ENSGALG00010020992 | 0.976042187 | 0.35008758  |
| ENSGALG00010020993 | 0.889241051 | 0.302312688 |
| ENSGALG00010020994 | 0.954509115 | 0.249098979 |
| ENSGALG00010020995 | 0.880315373 | 0.246531003 |
| ENSGALG00010020996 | 0.262734614 | 0.270303331 |
| ENSGALG00010020997 | 0.836252066 | 0.264299586 |
| ENSGALG00010020998 | 0.846853536 | 0.336328229 |
| ENSGALG00010020999 | 0.901447205 | 0.310994776 |
| ENSGALG00010021000 | 0.923364422 | 0.304056067 |
| ENSGALG00010021001 | 0.684949656 | 0.293027331 |
| ENSGALG00010021002 | 0.870396448 | 0.324648288 |
| ENSGALG00010021003 | 0.738230749 | 0.183049818 |
| ENSGALG00010021004 | 0.973918422 | 0.368067701 |
| ENSGALG00010021010 | 0.695115318 | 0.023156158 |
| ENSGALG00010021011 | 0.934268106 | 0.284947495 |
| ENSGALG00010021012 | 0.671052755 | 0.180134279 |
| ENSGALG00010021013 | 0.444457376 | 0.108784589 |
| ENSGALG00010021014 | 0.967159102 | 0.237446278 |
| ENSGALG00010021015 | 0.044890037 | 0.24423872  |
| ENSGALG00010021016 | 0.562211186 | 0.049345714 |
| ENSGALG00010021017 | 0.865839912 | 0.459478281 |
| ENSGALG00010021018 | 0.372732431 | 0.375576766 |
| ENSGALG00010021019 | 0.394438458 | 0.320085186 |
| ENSGALG00010021020 | 0.929300294 | 0.195874688 |
| ENSGALG00010021021 | 0.603391953 | 0.447440598 |
| ENSGALG00010021022 | 0.691714303 | 0.046575166 |
| ENSGALG00010021023 | 0.865194791 | 0.189914265 |
| ENSGALG00010021024 | 0.213376706 | 0.153329428 |
| ENSGALG00010021025 | 0.986055326 | 0.27399203  |
| ENSGALG00010021026 | 0.857087804 | 0.310267784 |
| ENSGALG00010021027 | 0.944819842 | 0.375290751 |
| ENSGALG00010021028 | 0.460937806 | 0.038984849 |
| ENSGALG00010021029 | 0.891962305 | 0.311578479 |
| ENSGALG00010021030 | 0.866389668 | 0.279355678 |
| ENSGALG00010021031 | 0.707763816 | 0.042798516 |
| ENSGALG00010021032 | 0.895341292 | 0.357277409 |
| ENSGALG00010021033 | 0.91454956  | 0.403860376 |
| ENSGALG00010021034 | 0.93040332  | 0.456733353 |
| ENSGALG00010021036 | 0.798485683 | 0.169437539 |

|                    |             |             |
|--------------------|-------------|-------------|
| ENSGALG00010021038 | 0.951025974 | 0.294576979 |
| ENSGALG00010021039 | 0.368811714 | 0.142697385 |
| ENSGALG00010021041 | 0.864182722 | 0.353206296 |
| ENSGALG00010021042 | 0.978110709 | 0.377535071 |
| ENSGALG00010021043 | 0.972158279 | 0.251593261 |
| ENSGALG00010021044 | 0.946217749 | 0.212780722 |
| ENSGALG00010021045 | 0.952301578 | 0.262233082 |
| ENSGALG00010021046 | 0.572069921 | 0.205464264 |
| ENSGALG00010021047 | 0.958758904 | 0.314346913 |
| ENSGALG00010021048 | 0.587308794 | 0.028998449 |
| ENSGALG00010021050 | 0.770096089 | 0.41070108  |
| ENSGALG00010021051 | 0.470001907 | 0.171834962 |
| ENSGALG00010021052 | 0.824919234 | 0.341171504 |
| ENSGALG00010021054 | 0.157484768 | 0.120027785 |
| ENSGALG00010021055 | 0.139629072 | 0.295467283 |
| ENSGALG00010021056 | 0.262922434 | 0.138601464 |
| ENSGALG00010021057 | 0.032202385 | 0.105848779 |
| ENSGALG00010021058 | 0.085780402 | 0.073999969 |
| ENSGALG00010021060 | 0.111315923 | 0.319375103 |
| ENSGALG00010021062 | 0.887801125 | 0.23494162  |
| ENSGALG00010021063 | 0.294277215 | 0.008754743 |
| ENSGALG00010021064 | 0.985075675 | 0.312171736 |
| ENSGALG00010021065 | 0.928749052 | 0.305348297 |
| ENSGALG00010021066 | 0.27096321  | 0.478281169 |
| ENSGALG00010021067 | 0.938057831 | 0.374628257 |
| ENSGALG00010021068 | 0.367319118 | 0.191398843 |
| ENSGALG00010021069 | 0.902705132 | 0.42388217  |
| ENSGALG00010021070 | 0.643337466 | 0.039973004 |
| ENSGALG00010021071 | 0.987364922 | 0.324911797 |
| ENSGALG00010021072 | 0.911867812 | 0.181929108 |
| ENSGALG00010021073 | 0.864420874 | 0.365777594 |
| ENSGALG00010021074 | 0.921538502 | 0.464807482 |
| ENSGALG00010021075 | 0.979464548 | 0.334283524 |
| ENSGALG00010021076 | 0.890078601 | 0.298986022 |
| ENSGALG00010021077 | 0.938351632 | 0.20936594  |
| ENSGALG00010021078 | 0.817662606 | 0.348474609 |
| ENSGALG00010021079 | 0.770096248 | 0.084913514 |
| ENSGALG00010021080 | 0.974452027 | 0.307470407 |
| ENSGALG00010021081 | 0.952878307 | 0.500723052 |
| ENSGALG00010021082 | 0.986705752 | 0.329925233 |
| ENSGALG00010021083 | 0.89485466  | 0.218991046 |
| ENSGALG00010021085 | 0.972308323 | 0.304689379 |
| ENSGALG00010021086 | 0.810465386 | 0.284430951 |
| ENSGALG00010021087 | 0.88220969  | 0.278241204 |
| ENSGALG00010021088 | 0.694069233 | 0.253675222 |
| ENSGALG00010021089 | 0.964279764 | 0.286313837 |
| ENSGALG00010021090 | 0.497172482 | 0.047761259 |
| ENSGALG00010021091 | 0.16854104  | 0.128241089 |
| ENSGALG00010021092 | 0.935567309 | 0.258447291 |
| ENSGALG00010021093 | 0.992152859 | 0.312526583 |
| ENSGALG00010021094 | 0.216617034 | 0.076842875 |
| ENSGALG00010021095 | 0.952050909 | 0.341041261 |
| ENSGALG00010021096 | 0.909509002 | 0.260605608 |
| ENSGALG00010021097 | 0.136947146 | 0.268309739 |
| ENSGALG00010021098 | 0.839698454 | 0.223729724 |
| ENSGALG00010021099 | 0.036589361 | 0.309600981 |

|                    |             |             |
|--------------------|-------------|-------------|
| ENSGALG00010021100 | 0.147544011 | 0.079060464 |
| ENSGALG00010021102 | 0.8523105   | 0.249539672 |
| ENSGALG00010021103 | 0.761891907 | 0.43237284  |
| ENSGALG00010021104 | 0.470466534 | 0.185769266 |
| ENSGALG00010021105 | 0.625821429 | 0.431032002 |
| ENSGALG00010021106 | 0.861192621 | 0.299793467 |
| ENSGALG00010021107 | 0.482292316 | 0.278342016 |
| ENSGALG00010021108 | 0.734389445 | 0.397857524 |
| ENSGALG00010021109 | 0.025977801 | 0.148665342 |
| ENSGALG00010021110 | 0.997566311 | 0.332254123 |
| ENSGALG00010021111 | 0.987845492 | 0.303309872 |
| ENSGALG00010021112 | 0.494544772 | 0.212999153 |
| ENSGALG00010021113 | 0.666350691 | 0.295125779 |
| ENSGALG00010021114 | 0.985729065 | 0.325621479 |
| ENSGALG00010021115 | 0.901578408 | 0.256368564 |
| ENSGALG00010021116 | 0.950059089 | 0.23958428  |
| ENSGALG00010021117 | 0.989732564 | 0.357265739 |
| ENSGALG00010021118 | 0.800854053 | 0.413957545 |
| ENSGALG00010021120 | 0.547698073 | 0.149707754 |
| ENSGALG00010021121 | 0.963872126 | 0.282574065 |
| ENSGALG00010021122 | 0.965167822 | 0.326947545 |
| ENSGALG00010021123 | 0.993610517 | 0.320733152 |
| ENSGALG00010021124 | 0.433464225 | 0.186137581 |
| ENSGALG00010021125 | 0.22046875  | 0.595801529 |
| ENSGALG00010021126 | 0.94204959  | 0.220729626 |
| ENSGALG00010021127 | 0.920761862 | 0.381607981 |
| ENSGALG00010021128 | 0.208550923 | 0.676301294 |
| ENSGALG00010021129 | 0.609422275 | 0.317948122 |
| ENSGALG00010021130 | 0.990022768 | 0.30851861  |
| ENSGALG00010021131 | 0.288837326 | 0.096909964 |
| ENSGALG00010021132 | 0.301772951 | 0.966506966 |
| ENSGALG00010021133 | 0.821138388 | 0.244324065 |
| ENSGALG00010021134 | 0.968800269 | 0.427331756 |
| ENSGALG00010021135 | 0.869848801 | 0.229076178 |
| ENSGALG00010021136 | 0.356674995 | 0.077564006 |
| ENSGALG00010021137 | 0.95499035  | 0.240200574 |
| ENSGALG00010021138 | 0.315473351 | 0.24335246  |
| ENSGALG00010021139 | 0.846857098 | 0.058634647 |
| ENSGALG00010021141 | 0.959828485 | 0.475512576 |
| ENSGALG00010021142 | 0.463363719 | 0.389756237 |
| ENSGALG00010021143 | 0.438678746 | 0.103266126 |
| ENSGALG00010021144 | 0.83023731  | 0.218032551 |
| ENSGALG00010021145 | 0.801663607 | 0.167520196 |
| ENSGALG00010021146 | 0.559379703 | 0.1605864   |
| ENSGALG00010021147 | 0.805688679 | 0.23462254  |
| ENSGALG00010021148 | 0.729959565 | 0.155801824 |
| ENSGALG00010021152 | 0.161821862 | 0.098757786 |
| ENSGALG00010021153 | 0.972385652 | 0.28425539  |
| ENSGALG00010021154 | 0.977693634 | 0.292174643 |
| ENSGALG00010021155 | 0.874628471 | 0.485277681 |
| ENSGALG00010021156 | 0.972235746 | 0.30009525  |
| ENSGALG00010021157 | 0.910302878 | 0.309150584 |
| ENSGALG00010021158 | 0.527825769 | 0.389746731 |
| ENSGALG00010021159 | 0.992426083 | 0.359268691 |
| ENSGALG00010021160 | 0.342500778 | 0.030022035 |
| ENSGALG00010021161 | 0.86983055  | 0.453711963 |

|                    |             |             |
|--------------------|-------------|-------------|
| ENSGALG00010021162 | 0.905527013 | 0.213930254 |
| ENSGALG00010021163 | 0.735906337 | 0.14924234  |
| ENSGALG00010021164 | 0.705164452 | 0.161622806 |
| ENSGALG00010021165 | 0.991099849 | 0.372264436 |
| ENSGALG00010021166 | 0.894429328 | 0.164682432 |
| ENSGALG00010021167 | 0.970607293 | 0.317434408 |
| ENSGALG00010021168 | 0.816116778 | 0.320379746 |
| ENSGALG00010021169 | 0.991846576 | 0.337795295 |
| ENSGALG00010021170 | 0.723942706 | 0.392407596 |
| ENSGALG00010021171 | 0.372864851 | 0.219372345 |
| ENSGALG00010021172 | 0.274506148 | 0.237011335 |
| ENSGALG00010021173 | 0.761087273 | 0.425204459 |
| ENSGALG00010021174 | 0.544393435 | 0.148577283 |
| ENSGALG00010021175 | 0.915164927 | 0.278886278 |
| ENSGALG00010021176 | 0.77819588  | 0.23926245  |
| ENSGALG00010021177 | 0.987543418 | 0.320177512 |
| ENSGALG00010021178 | 0.989800342 | 0.358909475 |
| ENSGALG00010021180 | 0.961243281 | 0.340443005 |
| ENSGALG00010021181 | 0.885890176 | 0.172535822 |
| ENSGALG00010021182 | 0.41706746  | 0.156331863 |
| ENSGALG00010021183 | 0.848805203 | 0.130910889 |
| ENSGALG00010021184 | 0.592520341 | 0.591458683 |
| ENSGALG00010021185 | 0.238945004 | 0.401007102 |
| ENSGALG00010021186 | 0.759519407 | 0.042104238 |
| ENSGALG00010021187 | 0.928246985 | 0.275265703 |
| ENSGALG00010021188 | 0.005716958 | 0.208013707 |
| ENSGALG00010021189 | 0.876172444 | 0.327651669 |
| ENSGALG00010021190 | 0.936135166 | 0.456130833 |
| ENSGALG00010021191 | 0.968168651 | 0.277957781 |
| ENSGALG00010021192 | 0.498549357 | 0.044109836 |
| ENSGALG00010021193 | 0.747863473 | 0.361761791 |
| ENSGALG00010021194 | 0.396530764 | 0.023277046 |
| ENSGALG00010021195 | 0.964788738 | 0.236375686 |
| ENSGALG00010021196 | 0.978264753 | 0.325622917 |
| ENSGALG00010021197 | 0.950080447 | 0.230095738 |
| ENSGALG00010021199 | 0.325440147 | 0.001715882 |
| ENSGALG00010021200 | 0.814077063 | 0.360904935 |
| ENSGALG00010021201 | 0.713745339 | 0.505548629 |
| ENSGALG00010021202 | 0.988570578 | 0.369390927 |
| ENSGALG00010021203 | 0.949224373 | 0.416897339 |
| ENSGALG00010021204 | 0.530638225 | 0.100173848 |
| ENSGALG00010021205 | 0.452248863 | 0.162896312 |
| ENSGALG00010021206 | 0.045665413 | 0.009527025 |
| ENSGALG00010021207 | 0.919821803 | 0.090781201 |
| ENSGALG00010021208 | 0.211022858 | 0.278044165 |
| ENSGALG00010021210 | 0.947053408 | 0.350119368 |
| ENSGALG00010021211 | 0.28416405  | 0.283723572 |
| ENSGALG00010021212 | 0.994249349 | 0.30123471  |
| ENSGALG00010021213 | 0.876730973 | 0.174890759 |
| ENSGALG00010021214 | 0.790854933 | 0.226076673 |
| ENSGALG00010021215 | 0.975126551 | 0.321378236 |
| ENSGALG00010021217 | 0.815997182 | 0.436258775 |
| ENSGALG00010021218 | 0.741015198 | 0.234942005 |
| ENSGALG00010021220 | 0.985941439 | 0.339083372 |
| ENSGALG00010021221 | 0.313684988 | 0.055668615 |
| ENSGALG00010021222 | 0.471170925 | 0.320973334 |

|                    |             |             |
|--------------------|-------------|-------------|
| ENSGALG00010021223 | 0.403059424 | 0.120443769 |
| ENSGALG00010021224 | 0.986348488 | 0.334185926 |
| ENSGALG00010021225 | 0.910576438 | 0.330115112 |
| ENSGALG00010021227 | 0.960630868 | 0.297888823 |
| ENSGALG00010021228 | 0.997105832 | 0.335912631 |
| ENSGALG00010021229 | 0.989736712 | 0.339329706 |
| ENSGALG00010021230 | 0.616685287 | 0.123200582 |
| ENSGALG00010021231 | 0.772727049 | 0.089989664 |
| ENSGALG00010021232 | 0.927844881 | 0.226217132 |
| ENSGALG00010021233 | 0.282715514 | 0.232347252 |
| ENSGALG00010021234 | 0.338962852 | 0.220700174 |
| ENSGALG00010021235 | 0.867157748 | 0.278889398 |
| ENSGALG00010021236 | 0.21723332  | 0.17470015  |
| ENSGALG00010021237 | 0.420719908 | 0.342286786 |
| ENSGALG00010021238 | 0.947691437 | 0.308254731 |
| ENSGALG00010021239 | 0.535593617 | 0.198249774 |
| ENSGALG00010021240 | 0.922288198 | 0.276069393 |
| ENSGALG00010021241 | 0.245815091 | 0.22680516  |
| ENSGALG00010021242 | 0.232917055 | 0.094533741 |
| ENSGALG00010021243 | 0.497654955 | 0.390933862 |
| ENSGALG00010021244 | 0.972567803 | 0.273037241 |
| ENSGALG00010021245 | 0.975124716 | 0.277455204 |
| ENSGALG00010021246 | 0.962698549 | 0.308606619 |
| ENSGALG00010021247 | 0.668278438 | 0.319993832 |
| ENSGALG00010021248 | 0.952734226 | 0.239138111 |
| ENSGALG00010021249 | 0.396514982 | 0.355208977 |
| ENSGALG00010021250 | 0.854954138 | 0.436397097 |
| ENSGALG00010021251 | 0.620293089 | 0.003804214 |
| ENSGALG00010021252 | 0.083657292 | 0.305515726 |
| ENSGALG00010021253 | 0.353203363 | 0.124657082 |
| ENSGALG00010021254 | 0.768124826 | 0.299840357 |
| ENSGALG00010021255 | 0.886951447 | 0.332957262 |
| ENSGALG00010021256 | 0.906838706 | 0.307486624 |
| ENSGALG00010021257 | 0.523085699 | 0.176300784 |
| ENSGALG00010021258 | 0.467260937 | 0.092809959 |
| ENSGALG00010021259 | 0.435568589 | 0.301395022 |
| ENSGALG00010021260 | 0.765559042 | 0.288710238 |
| ENSGALG00010021261 | 0.97514771  | 0.424851968 |
| ENSGALG00010021262 | 0.199091409 | 0.008690348 |
| ENSGALG00010021263 | 0.838031539 | 0.220781682 |
| ENSGALG00010021264 | 0.252240304 | 0.173980408 |
| ENSGALG00010021265 | 0.083490404 | 0.082355717 |
| ENSGALG00010021266 | 0.417590842 | 0.270759894 |
| ENSGALG00010021267 | 0.337732685 | 0.202448997 |
| ENSGALG00010021268 | 0.270451009 | 0.090541667 |
| ENSGALG00010021269 | 0.759283749 | 0.198433749 |
| ENSGALG00010021271 | 0.977903605 | 0.348328704 |
| ENSGALG00010021272 | 0.894241347 | 0.375019679 |
| ENSGALG00010021275 | 0.952798699 | 0.488254485 |
| ENSGALG00010021276 | 0.85022333  | 0.295974603 |
| ENSGALG00010021277 | 0.278555151 | 0.379192236 |
| ENSGALG00010021278 | 0.354842934 | 0.074344186 |
| ENSGALG00010021280 | 0.396365709 | 0.157137627 |
| ENSGALG00010021281 | 0.617004757 | 0.316574516 |
| ENSGALG00010021282 | 0.064282799 | 0.176650367 |
| ENSGALG00010021283 | 0.488293262 | 0.007527113 |

|                    |             |             |
|--------------------|-------------|-------------|
| ENSGALG00010021284 | 0.769419096 | 0.160893678 |
| ENSGALG00010021285 | 0.110907219 | 0.039739511 |
| ENSGALG00010021286 | 0.130058858 | 0.155301609 |
| ENSGALG00010021287 | 0.812791731 | 0.30011579  |
| ENSGALG00010021288 | 0.480337673 | 0.31086332  |
| ENSGALG00010021290 | 0.587650857 | 0.315246583 |
| ENSGALG00010021292 | 0.105945485 | 0.229581322 |
| ENSGALG00010021293 | 0.984941765 | 0.316715041 |
| ENSGALG00010021294 | 0.78696639  | 0.568791048 |
| ENSGALG00010021295 | 0.54330064  | 0.131568803 |
| ENSGALG00010021296 | 0.957860206 | 0.35790694  |
| ENSGALG00010021298 | 0.121115808 | 0.401444111 |
| ENSGALG00010021299 | 0.053819373 | 0.056702352 |
| ENSGALG00010021301 | 0.983087221 | 0.355303763 |
| ENSGALG00010021302 | 0.016423554 | 0.009302513 |
| ENSGALG00010021303 | 0.742725675 | 0.359398826 |
| ENSGALG00010021307 | 0.711173504 | 0.006534254 |
| ENSGALG00010021308 | 0.107122696 | 0.18196647  |
| ENSGALG00010021309 | 0.93357536  | 0.323275108 |
| ENSGALG00010021311 | 0.821167551 | 0.42907811  |
| ENSGALG00010021312 | 0.983305491 | 0.33336323  |
| ENSGALG00010021313 | 0.612509828 | 0.306224167 |
| ENSGALG00010021314 | 0.078047127 | 0.032127636 |
| ENSGALG00010021315 | 0.107723114 | 0.22629214  |
| ENSGALG00010021316 | 0.988604248 | 0.342015738 |
| ENSGALG00010021317 | 0.013744607 | 0.263681249 |
| ENSGALG00010021318 | 0.884666388 | 0.212873503 |
| ENSGALG00010021320 | 0.978375928 | 0.251381462 |
| ENSGALG00010021321 | 0.336118445 | 0.277401528 |
| ENSGALG00010021325 | 0.908630189 | 0.40758817  |
| ENSGALG00010021327 | 0.960208738 | 0.411794199 |
| ENSGALG00010021329 | 0.773509858 | 0.18168102  |
| ENSGALG00010021330 | 0.798693348 | 0.365306784 |
| ENSGALG00010021332 | 0.994084318 | 0.328952924 |
| ENSGALG00010021333 | 0.408511391 | 0.051283331 |
| ENSGALG00010021334 | 0.372365604 | 0.116154215 |
| ENSGALG00010021335 | 0.661394151 | 0.378354015 |
| ENSGALG00010021337 | 0.760847613 | 0.214134821 |
| ENSGALG00010021338 | 0.977145697 | 0.35023091  |
| ENSGALG00010021339 | 0.789306894 | 0.105377821 |
| ENSGALG00010021340 | 0.178690539 | 0.104880205 |
| ENSGALG00010021341 | 0.888556749 | 0.250946482 |
| ENSGALG00010021342 | 0.49421039  | 0.014551216 |
| ENSGALG00010021344 | 0.356494703 | 0.029773258 |
| ENSGALG00010021345 | 0.886741446 | 0.102236835 |
| ENSGALG00010021346 | 0.806544962 | 0.32323063  |
| ENSGALG00010021348 | 0.956709313 | 0.296371105 |
| ENSGALG00010021350 | 0.74267398  | 0.34324766  |
| ENSGALG00010021352 | 0.618005071 | 0.430176942 |
| ENSGALG00010021353 | 0.987646816 | 0.277493796 |
| ENSGALG00010021354 | 0.848199006 | 0.285831948 |
| ENSGALG00010021357 | 0.581934035 | 0.148412937 |
| ENSGALG00010021358 | 0.926307    | 0.382177934 |
| ENSGALG00010021360 | 0.882049588 | 0.50270681  |
| ENSGALG00010021361 | 0.814106223 | 0.215565892 |
| ENSGALG00010021362 | 0.830984815 | 0.197827548 |



|                    |             |             |
|--------------------|-------------|-------------|
| ENSGALG00010021363 | 0.959032671 | 0.364988281 |
| ENSGALG00010021366 | 0.900888961 | 0.156382604 |
| ENSGALG00010021367 | 0.818709501 | 0.129344398 |
| ENSGALG00010021369 | 0.235630588 | 0.132393411 |
| ENSGALG00010021370 | 0.839631042 | 0.07048721  |
| ENSGALG00010021371 | 0.08314654  | 0.268325236 |
| ENSGALG00010021372 | 0.903906743 | 0.070562637 |
| ENSGALG00010021373 | 0.614487963 | 0.270396945 |
| ENSGALG00010021374 | 0.822528308 | 0.287752074 |
| ENSGALG00010021375 | 0.826785315 | 0.262351253 |
| ENSGALG00010021376 | 0.169144926 | 0.246837998 |
| ENSGALG00010021377 | 0.557583216 | 0.15756993  |
| ENSGALG00010021378 | 0.699845186 | 0.24492978  |
| ENSGALG00010021379 | 0.717595251 | 0.518974717 |
| ENSGALG00010021380 | 0.453139391 | 0.301014156 |
| ENSGALG00010021381 | 0.995848195 | 0.309035849 |
| ENSGALG00010021382 | 0.939329019 | 0.21682364  |
| ENSGALG00010021383 | 0.906628179 | 0.340241562 |
| ENSGALG00010021384 | 0.495000548 | 0.190954161 |
| ENSGALG00010021386 | 0.026265784 | 0.082890826 |
| ENSGALG00010021387 | 0.576759017 | 0.001354273 |
| ENSGALG00010021388 | 0.478046386 | 0.544765308 |
| ENSGALG00010021390 | 0.8925425   | 0.481397609 |
| ENSGALG00010021391 | 0.885297158 | 0.13849728  |
| ENSGALG00010021392 | 0.769811148 | 0.033352841 |
| ENSGALG00010021393 | 0.179906894 | 0.194351137 |
| ENSGALG00010021394 | 0.95841121  | 0.321537707 |
| ENSGALG00010021395 | 0.9833474   | 0.351399176 |
| ENSGALG00010021396 | 0.526665948 | 0.05497845  |
| ENSGALG00010021399 | 0.222464    | 0.195401375 |
| ENSGALG00010021400 | 0.987409604 | 0.315924789 |
| ENSGALG00010021401 | 0.97516903  | 0.28583422  |
| ENSGALG00010021402 | 0.809753067 | 0.152147221 |
| ENSGALG00010021404 | 0.92558452  | 0.284441885 |
| ENSGALG00010021405 | 0.981822141 | 0.294851973 |
| ENSGALG00010021406 | 0.309926173 | 0.088116819 |
| ENSGALG00010021407 | 0.710915206 | 0.001038817 |
| ENSGALG00010021408 | 0.823237984 | 0.523193207 |
| ENSGALG00010021409 | 0.914011366 | 0.214922883 |
| ENSGALG00010021411 | 0.98825773  | 0.334395262 |
| ENSGALG00010021412 | 0.947646482 | 0.404760362 |
| ENSGALG00010021413 | 0.789964609 | 0.117807461 |
| ENSGALG00010021414 | 0.94294098  | 0.28163113  |
| ENSGALG00010021415 | 0.753166971 | 0.155723932 |
| ENSGALG00010021416 | 0.982150271 | 0.396940169 |
| ENSGALG00010021417 | 0.529272171 | 0.128227065 |
| ENSGALG00010021419 | 0.239201584 | 0.261312635 |
| ENSGALG00010021420 | 0.563817705 | 0.324551313 |
| ENSGALG00010021421 | 0.882695567 | 0.301498393 |
| ENSGALG00010021423 | 0.214232768 | 0.198854563 |
| ENSGALG00010021424 | 0.893437181 | 0.271558933 |
| ENSGALG00010021425 | 0.629217692 | 0.215248989 |
| ENSGALG00010021426 | 0.924162783 | 0.376869465 |
| ENSGALG00010021427 | 0.824976516 | 0.369980989 |
| ENSGALG00010021429 | 0.933962985 | 0.334147595 |
| ENSGALG00010021431 | 0.831924498 | 0.258129699 |

|                    |             |             |
|--------------------|-------------|-------------|
| ENSGALG00010021432 | 0.298009839 | 0.475159739 |
| ENSGALG00010021433 | 0.943830978 | 0.29629444  |
| ENSGALG00010021434 | 0.423002515 | 0.104793551 |
| ENSGALG00010021435 | 0.967353001 | 0.22438581  |
| ENSGALG00010021436 | 0.360841789 | 0.245455387 |
| ENSGALG00010021438 | 0.945108981 | 0.283424856 |
| ENSGALG00010021439 | 0.974999709 | 0.283752358 |
| ENSGALG00010021440 | 0.209224158 | 0.141084697 |
| ENSGALG00010021441 | 0.627523992 | 0.22858539  |
| ENSGALG00010021443 | 0.869413922 | 0.296662881 |
| ENSGALG00010021444 | 0.982354231 | 0.305633025 |
| ENSGALG00010021447 | 0.348032803 | 0.146426442 |
| ENSGALG00010021448 | 0.819527261 | 0.333443094 |
| ENSGALG00010021450 | 0.707534729 | 0.212488698 |
| ENSGALG00010021452 | 0.992537281 | 0.291532995 |
| ENSGALG00010021453 | 0.848546034 | 0.486005203 |
| ENSGALG00010021454 | 0.784605464 | 0.264186249 |
| ENSGALG00010021455 | 0.61320549  | 0.063273901 |
| ENSGALG00010021457 | 0.855921942 | 0.230180647 |
| ENSGALG00010021458 | 0.778249026 | 0.3981127   |
| ENSGALG00010021459 | 0.963374211 | 0.330254707 |
| ENSGALG00010021460 | 0.540360415 | 0.242292095 |
| ENSGALG00010021461 | 0.529760564 | 0.094041594 |
| ENSGALG00010021462 | 0.353331941 | 0.071532956 |
| ENSGALG00010021463 | 0.506652925 | 0.067505744 |
| ENSGALG00010021464 | 0.945237895 | 0.27891948  |
| ENSGALG00010021465 | 0.979421832 | 0.301385059 |
| ENSGALG00010021466 | 0.810080048 | 0.364181565 |
| ENSGALG00010021467 | 0.566701848 | 0.022229614 |
| ENSGALG00010021468 | 0.925589669 | 0.296106358 |
| ENSGALG00010021469 | 0.965366319 | 0.331796089 |
| ENSGALG00010021470 | 0.880481047 | 0.183210263 |
| ENSGALG00010021472 | 0.57605649  | 0.407257104 |
| ENSGALG00010021473 | 0.948668761 | 0.28739796  |
| ENSGALG00010021474 | 0.96635828  | 0.472458556 |
| ENSGALG00010021475 | 0.702445938 | 0.379198528 |
| ENSGALG00010021476 | 0.119116039 | 0.271351263 |
| ENSGALG00010021477 | 0.726301529 | 0.340659009 |
| ENSGALG00010021478 | 0.896480702 | 0.211053323 |
| ENSGALG00010021479 | 0.834627285 | 0.515466876 |
| ENSGALG00010021480 | 0.910182823 | 0.291273843 |
| ENSGALG00010021481 | 0.953055802 | 0.358395288 |
| ENSGALG00010021482 | 0.144693667 | 0.428850417 |
| ENSGALG00010021483 | 0.89616453  | 0.309391721 |
| ENSGALG00010021484 | 0.566379864 | 0.050258776 |
| ENSGALG00010021485 | 0.19968793  | 0.024506792 |
| ENSGALG00010021487 | 0.340069836 | 0.197736436 |
| ENSGALG00010021488 | 0.769967476 | 0.110486625 |
| ENSGALG00010021489 | 0.488992148 | 0.139362686 |
| ENSGALG00010021490 | 0.6317296   | 0.218691585 |
| ENSGALG00010021492 | 0.933878529 | 0.420633794 |
| ENSGALG00010021493 | 0.970127447 | 0.267911585 |
| ENSGALG00010021494 | 0.911626893 | 0.208773514 |
| ENSGALG00010021495 | 0.602847268 | 0.160291358 |
| ENSGALG00010021496 | 0.893839163 | 0.180696445 |
| ENSGALG00010021497 | 0.009346827 | 0.215206228 |

|                    |             |             |
|--------------------|-------------|-------------|
| ENSGALG00010021498 | 0.919529217 | 0.298223101 |
| ENSGALG00010021499 | 0.659380641 | 0.166734484 |
| ENSGALG00010021500 | 0.933927787 | 0.180568488 |
| ENSGALG00010021501 | 0.363075546 | 0.281950975 |
| ENSGALG00010021502 | 0.904712126 | 0.234141072 |
| ENSGALG00010021503 | 0.738426689 | 0.213495084 |
| ENSGALG00010021504 | 0.950480525 | 0.421941368 |
| ENSGALG00010021505 | 0.935796015 | 0.382486478 |
| ENSGALG00010021506 | 0.241299605 | 0.09007608  |
| ENSGALG00010021507 | 0.072280778 | 0.12225007  |
| ENSGALG00010021508 | 0.381842179 | 0.231163936 |
| ENSGALG00010021509 | 0.964557174 | 0.30427256  |
| ENSGALG00010021510 | 0.972376219 | 0.264344494 |
| ENSGALG00010021511 | 0.024272986 | 0.203024922 |
| ENSGALG00010021512 | 0.676647074 | 0.264425584 |
| ENSGALG00010021513 | 0.819530058 | 0.078132839 |
| ENSGALG00010021514 | 0.961786029 | 0.325700261 |
| ENSGALG00010021515 | 0.939982598 | 0.299979706 |
| ENSGALG00010021516 | 0.50790501  | 0.261863211 |
| ENSGALG00010021517 | 0.154837879 | 0.024680553 |
| ENSGALG00010021518 | 0.459926806 | 0.132413853 |
| ENSGALG00010021519 | 0.990732347 | 0.363872495 |
| ENSGALG00010021520 | 0.448278173 | 0.154751904 |
| ENSGALG00010021521 | 0.475893774 | 0.012334798 |
| ENSGALG00010021522 | 0.812577502 | 0.293441603 |
| ENSGALG00010021523 | 0.811083847 | 0.304204807 |
| ENSGALG00010021524 | 0.103192516 | 0.33770639  |
| ENSGALG00010021525 | 0.823383161 | 0.200870609 |
| ENSGALG00010021526 | 0.984602709 | 0.350060867 |
| ENSGALG00010021527 | 0.507951217 | 0.266445882 |
| ENSGALG00010021528 | 0.95322725  | 0.280657187 |
| ENSGALG00010021529 | 0.738551157 | 0.284655291 |
| ENSGALG00010021530 | 0.24255666  | 0.069588525 |
| ENSGALG00010021531 | 0.415304269 | 0.091288242 |
| ENSGALG00010021532 | 0.290771179 | 0.089898397 |
| ENSGALG00010021533 | 0.066212143 | 0.43799137  |
| ENSGALG00010021534 | 0.94759499  | 0.289719891 |
| ENSGALG00010021535 | 0.902663288 | 0.354296184 |
| ENSGALG00010021536 | 0.384387589 | 0.602708267 |
| ENSGALG00010021537 | 0.186934798 | 0.402872853 |
| ENSGALG00010021538 | 0.886586265 | 0.245316504 |
| ENSGALG00010021539 | 0.93241022  | 0.245875981 |
| ENSGALG00010021540 | 0.984942238 | 0.324146019 |
| ENSGALG00010021541 | 0.957418807 | 0.33939942  |
| ENSGALG00010021543 | 0.608205762 | 0.312662424 |
| ENSGALG00010021545 | 0.989574671 | 0.3384259   |
| ENSGALG00010021546 | 0.56962571  | 0.46398112  |
| ENSGALG00010021547 | 0.396668506 | 0.181671381 |
| ENSGALG00010021549 | 0.97048101  | 0.39053354  |
| ENSGALG00010021550 | 0.897820269 | 0.349731068 |
| ENSGALG00010021551 | 0.605576273 | 0.167183587 |
| ENSGALG00010021552 | 0.971614851 | 0.33631496  |
| ENSGALG00010021553 | 0.98630468  | 0.296935275 |
| ENSGALG00010021554 | 0.611749252 | 0.212190167 |
| ENSGALG00010021555 | 0.268346037 | 0.249143613 |
| ENSGALG00010021556 | 0.951487423 | 0.252679896 |

|                    |             |             |
|--------------------|-------------|-------------|
| ENSGALG00010021557 | 0.499571562 | 0.142812618 |
| ENSGALG00010021558 | 0.986634134 | 0.3318284   |
| ENSGALG00010021559 | 0.871762378 | 0.322800002 |
| ENSGALG00010021560 | 0.598169158 | 0.2162124   |
| ENSGALG00010021561 | 0.931081963 | 0.413604501 |
| ENSGALG00010021562 | 0.954142924 | 0.291893197 |
| ENSGALG00010021564 | 0.987878255 | 0.302732125 |
| ENSGALG00010021565 | 0.96892782  | 0.309114099 |
| ENSGALG00010021566 | 0.672096447 | 0.123206994 |
| ENSGALG00010021568 | 0.966929566 | 0.33083126  |
| ENSGALG00010021569 | 0.702022904 | 0.032681104 |
| ENSGALG00010021570 | 0.864410743 | 0.337175449 |
| ENSGALG00010021571 | 0.912664203 | 0.322194852 |
| ENSGALG00010021572 | 0.961647469 | 0.380993923 |
| ENSGALG00010021573 | 0.926184431 | 0.296874831 |
| ENSGALG00010021574 | 0.954996459 | 0.340819862 |
| ENSGALG00010021575 | 0.105747864 | 0.131309275 |
| ENSGALG00010021576 | 0.89303679  | 0.169742694 |
| ENSGALG00010021577 | 0.993172581 | 0.319591306 |
| ENSGALG00010021578 | 0.92737744  | 0.3058951   |
| ENSGALG00010021579 | 0.97442743  | 0.289257679 |
| ENSGALG00010021580 | 0.752241556 | 0.119426116 |
| ENSGALG00010021581 | 0.472657959 | 0.124919375 |
| ENSGALG00010021582 | 0.079630903 | 0.163135907 |
| ENSGALG00010021583 | 0.97958253  | 0.322990757 |
| ENSGALG00010021584 | 0.870113099 | 0.28587354  |
| ENSGALG00010021585 | 0.938738693 | 0.256225113 |
| ENSGALG00010021586 | 0.386317418 | 0.100081823 |
| ENSGALG00010021587 | 0.902461099 | 0.251068338 |
| ENSGALG00010021588 | 0.889641204 | 0.380443434 |
| ENSGALG00010021590 | 0.13947765  | 0.15261326  |
| ENSGALG00010021591 | 0.48798866  | 0.177542328 |
| ENSGALG00010021593 | 0.648557765 | 0.081767849 |
| ENSGALG00010021594 | 0.835187067 | 0.263359157 |
| ENSGALG00010021595 | 0.656481078 | 0.127197643 |
| ENSGALG00010021597 | 0.853924177 | 0.217787297 |
| ENSGALG00010021599 | 0.747157315 | 0.259203387 |
| ENSGALG00010021600 | 0.941154931 | 0.307353926 |
| ENSGALG00010021601 | 0.840047556 | 0.090120511 |
| ENSGALG00010021602 | 0.950193458 | 0.257444274 |
| ENSGALG00010021603 | 0.021324362 | 0.253113905 |
| ENSGALG00010021604 | 0.982067895 | 0.309978172 |
| ENSGALG00010021605 | 0.16505232  | 0.14714086  |
| ENSGALG00010021606 | 0.920771327 | 0.114430318 |
| ENSGALG00010021607 | 0.329738642 | 0.028090181 |
| ENSGALG00010021608 | 0.480593894 | 0.175264503 |
| ENSGALG00010021609 | 0.952629495 | 0.320153951 |
| ENSGALG00010021610 | 0.964977603 | 0.322211116 |
| ENSGALG00010021611 | 0.892793397 | 0.322751261 |
| ENSGALG00010021612 | 0.890011075 | 0.431462307 |
| ENSGALG00010021613 | 0.477586967 | 0.009722635 |
| ENSGALG00010021614 | 0.180831451 | 0.025295205 |
| ENSGALG00010021615 | 0.880304777 | 0.096098152 |
| ENSGALG00010021616 | 0.941784602 | 0.416113146 |
| ENSGALG00010021617 | 0.558742622 | 0.135232823 |
| ENSGALG00010021618 | 0.435266042 | 0.04291818  |

|                    |             |             |
|--------------------|-------------|-------------|
| ENSGALG00010021619 | 0.995361811 | 0.342048595 |
| ENSGALG00010021620 | 0.526612595 | 0.192636446 |
| ENSGALG00010021621 | 0.97317492  | 0.291324684 |
| ENSGALG00010021622 | 0.807236674 | 0.463490271 |
| ENSGALG00010021623 | 0.97955549  | 0.31941656  |
| ENSGALG00010021624 | 0.664059174 | 0.120036509 |
| ENSGALG00010021626 | 0.982924689 | 0.294345152 |
| ENSGALG00010021627 | 0.727421674 | 0.322941162 |
| ENSGALG00010021628 | 0.876820495 | 0.369190059 |
| ENSGALG00010021629 | 0.978465466 | 0.33821921  |
| ENSGALG00010021630 | 0.222856819 | 0.396279848 |
| ENSGALG00010021631 | 0.815672249 | 0.123579478 |
| ENSGALG00010021632 | 0.9031505   | 0.290054454 |
| ENSGALG00010021633 | 0.914948453 | 0.198787372 |
| ENSGALG00010021634 | 0.972816174 | 0.308248215 |
| ENSGALG00010021635 | 0.982224091 | 0.343811747 |
| ENSGALG00010021636 | 0.326554699 | 0.124094753 |
| ENSGALG00010021637 | 0.374130813 | 0.076000432 |
| ENSGALG00010021638 | 0.97850001  | 0.244485004 |
| ENSGALG00010021639 | 0.194978575 | 0.206766921 |
| ENSGALG00010021640 | 0.112514054 | 0.081532262 |
| ENSGALG00010021641 | 0.129174336 | 0.296426611 |
| ENSGALG00010021642 | 0.617857062 | 0.1934846   |
| ENSGALG00010021643 | 0.882530739 | 0.319056157 |
| ENSGALG00010021644 | 0.722662092 | 0.450407046 |
| ENSGALG00010021645 | 0.948117239 | 0.324313189 |
| ENSGALG00010021646 | 0.947357301 | 0.289412132 |
| ENSGALG00010021647 | 0.959260136 | 0.4191708   |
| ENSGALG00010021648 | 0.961461339 | 0.26899199  |
| ENSGALG00010021649 | 0.981377407 | 0.293674526 |
| ENSGALG00010021650 | 0.785415908 | 0.007455934 |
| ENSGALG00010021651 | 0.899329737 | 0.190215028 |
| ENSGALG00010021652 | 0.707051105 | 0.411997397 |
| ENSGALG00010021655 | 0.733625132 | 0.294455221 |
| ENSGALG00010021656 | 0.924746455 | 0.225773759 |
| ENSGALG00010021657 | 0.914643951 | 0.244930684 |
| ENSGALG00010021658 | 0.813204286 | 0.201190256 |
| ENSGALG00010021659 | 0.953030803 | 0.387011013 |
| ENSGALG00010021660 | 0.952901211 | 0.268274945 |
| ENSGALG00010021661 | 0.919058524 | 0.283079359 |
| ENSGALG00010021662 | 0.81055915  | 0.265398878 |
| ENSGALG00010021663 | 0.983048417 | 0.325258389 |
| ENSGALG00010021664 | 0.698358445 | 0.291620135 |
| ENSGALG00010021665 | 0.102593712 | 0.211517358 |
| ENSGALG00010021666 | 0.93920369  | 0.367029145 |
| ENSGALG00010021667 | 0.994309003 | 0.339017672 |
| ENSGALG00010021668 | 0.939572862 | 0.171422767 |
| ENSGALG00010021669 | 0.324441194 | 0.168858887 |
| ENSGALG00010021670 | 0.997368465 | 0.339337846 |
| ENSGALG00010021671 | 0.748910818 | 0.223921596 |
| ENSGALG00010021672 | 0.697752389 | 0.352177091 |
| ENSGALG00010021674 | 0.953742196 | 0.445759798 |
| ENSGALG00010021675 | 0.153340564 | 0.061027572 |
| ENSGALG00010021676 | 0.795190836 | 0.297861344 |
| ENSGALG00010021677 | 0.942812879 | 0.276207545 |
| ENSGALG00010021678 | 0.646023493 | 0.229609435 |

|                    |             |             |
|--------------------|-------------|-------------|
| ENSGALG00010021679 | 0.983942034 | 0.294270898 |
| ENSGALG00010021680 | 0.398065772 | 0.227683145 |
| ENSGALG00010021681 | 0.94056105  | 0.270862541 |
| ENSGALG00010021682 | 0.967107545 | 0.29875333  |
| ENSGALG00010021683 | 0.348507506 | 0.083315492 |
| ENSGALG00010021684 | 0.991851422 | 0.329367466 |
| ENSGALG00010021685 | 0.990886035 | 0.327954704 |
| ENSGALG00010021686 | 0.709131474 | 0.143455285 |
| ENSGALG00010021687 | 0.469259003 | 0.050254553 |
| ENSGALG00010021688 | 0.908838419 | 0.309552483 |
| ENSGALG00010021689 | 0.960932426 | 0.293080571 |
| ENSGALG00010021690 | 0.12495962  | 0.137192538 |
| ENSGALG00010021691 | 0.250749635 | 0.171170121 |
| ENSGALG00010021692 | 0.935786941 | 0.336991549 |
| ENSGALG00010021693 | 0.782879574 | 0.060306595 |
| ENSGALG00010021694 | 0.845201663 | 0.325984662 |
| ENSGALG00010021695 | 0.724582799 | 0.411199828 |
| ENSGALG00010021696 | 0.394555696 | 0.165889936 |
| ENSGALG00010021697 | 0.6158374   | 0.057085973 |
| ENSGALG00010021698 | 0.71056046  | 0.190986286 |
| ENSGALG00010021699 | 0.563144304 | 0.294068842 |
| ENSGALG00010021700 | 0.661534044 | 0.367096212 |
| ENSGALG00010021701 | 0.825157924 | 0.162349927 |
| ENSGALG00010021702 | 0.649030336 | 0.193147706 |
| ENSGALG00010021703 | 0.944155795 | 0.252666438 |
| ENSGALG00010021704 | 0.994059122 | 0.332574089 |
| ENSGALG00010021705 | 0.687030624 | 0.353299128 |
| ENSGALG00010021706 | 0.962703241 | 0.273357009 |
| ENSGALG00010021707 | 0.235630588 | 0.132393411 |
| ENSGALG00010021708 | 0.213066302 | 0.184369322 |
| ENSGALG00010021709 | 0.022908794 | 0.24480423  |
| ENSGALG00010021710 | 0.750525022 | 0.334164612 |
| ENSGALG00010021711 | 0.935285379 | 0.335670985 |
| ENSGALG00010021713 | 0.973149484 | 0.375069933 |
| ENSGALG00010021714 | 0.125113197 | 0.122244335 |
| ENSGALG00010021715 | 0.667473042 | 0.251634081 |
| ENSGALG00010021716 | 0.961924884 | 0.324214324 |
| ENSGALG00010021717 | 0.85571602  | 0.314032969 |
| ENSGALG00010021718 | 0.232025493 | 0.462527537 |
| ENSGALG00010021719 | 0.944896157 | 0.339566453 |
| ENSGALG00010021720 | 0.988538682 | 0.31221772  |
| ENSGALG00010021721 | 0.751365722 | 0.392280962 |
| ENSGALG00010021722 | 0.729165669 | 0.210224585 |
| ENSGALG00010021723 | 0.983622702 | 0.311789406 |
| ENSGALG00010021724 | 0.629455916 | 0.091114927 |
| ENSGALG00010021725 | 0.957935794 | 0.312712286 |
| ENSGALG00010021726 | 0.02307017  | 0.176006377 |
| ENSGALG00010021727 | 0.841038431 | 0.210881229 |
| ENSGALG00010021728 | 0.9153994   | 0.261356697 |
| ENSGALG00010021729 | 0.069722375 | 0.235962854 |
| ENSGALG00010021730 | 0.92212795  | 0.269075888 |
| ENSGALG00010021731 | 0.928265503 | 0.345528281 |
| ENSGALG00010021732 | 0.168800679 | 0.059729037 |
| ENSGALG00010021733 | 0.989249708 | 0.290724707 |
| ENSGALG00010021734 | 0.6323964   | 0.246772453 |
| ENSGALG00010021735 | 0.99000216  | 0.338438708 |

|                    |             |             |
|--------------------|-------------|-------------|
| ENSGALG00010021736 | 0.993378545 | 0.287073606 |
| ENSGALG00010021737 | 0.711195879 | 0.114505029 |
| ENSGALG00010021738 | 0.984538805 | 0.348554255 |
| ENSGALG00010021739 | 0.825880639 | 0.159546736 |
| ENSGALG00010021740 | 0.490720275 | 0.095682594 |
| ENSGALG00010021741 | 0.812736482 | 0.282667323 |
| ENSGALG00010021742 | 0.449776562 | 0.046501443 |
| ENSGALG00010021744 | 0.938407306 | 0.306895829 |
| ENSGALG00010021745 | 0.907947572 | 0.141670306 |
| ENSGALG00010021746 | 0.941552001 | 0.248149404 |
| ENSGALG00010021747 | 0.920669485 | 0.39364239  |
| ENSGALG00010021748 | 0.398208492 | 0.151400832 |
| ENSGALG00010021749 | 0.966136008 | 0.238386042 |
| ENSGALG00010021750 | 0.880436803 | 0.141307382 |
| ENSGALG00010021751 | 0.931500634 | 0.315737841 |
| ENSGALG00010021752 | 0.076627257 | 0.214412405 |
| ENSGALG00010021753 | 0.82817062  | 0.487447742 |
| ENSGALG00010021754 | 0.994277601 | 0.365274335 |
| ENSGALG00010021755 | 0.88496426  | 0.269011699 |
| ENSGALG00010021756 | 0.801797158 | 0.384365839 |
| ENSGALG00010021757 | 0.534842868 | 0.304617881 |
| ENSGALG00010021758 | 0.394888276 | 0.298935234 |
| ENSGALG00010021759 | 0.408212362 | 0.16109877  |
| ENSGALG00010021760 | 0.213236643 | 0.09979905  |
| ENSGALG00010021761 | 0.881389284 | 0.284621256 |
| ENSGALG00010021762 | 0.954147707 | 0.31912579  |
| ENSGALG00010021763 | 0.811108771 | 0.410273004 |
| ENSGALG00010021764 | 0.976920215 | 0.251571217 |
| ENSGALG00010021765 | 0.370520025 | 0.502856064 |
| ENSGALG00010021766 | 0.84584482  | 0.180354648 |
| ENSGALG00010021767 | 0.773641232 | 0.218398578 |
| ENSGALG00010021768 | 0.957923392 | 0.330996947 |
| ENSGALG00010021769 | 0.600887273 | 0.443914207 |
| ENSGALG00010021770 | 0.453425501 | 0.01239588  |
| ENSGALG00010021771 | 0.965871119 | 0.277820389 |
| ENSGALG00010021772 | 0.44285577  | 0.561283145 |
| ENSGALG00010021774 | 0.095720953 | 0.085467438 |
| ENSGALG00010021775 | 0.640712135 | 0.278439643 |
| ENSGALG00010021776 | 0.90704045  | 0.244149619 |
| ENSGALG00010021777 | 0.244699373 | 0.20034948  |
| ENSGALG00010021778 | 0.934994708 | 0.257126745 |
| ENSGALG00010021779 | 0.685237898 | 0.351396742 |
| ENSGALG00010021781 | 0.856722632 | 0.139662299 |
| ENSGALG00010021782 | 0.892898515 | 0.385097461 |
| ENSGALG00010021783 | 0.45058772  | 0.602995055 |
| ENSGALG00010021784 | 0.031846118 | 0.162328396 |
| ENSGALG00010021785 | 0.667948809 | 0.004041992 |
| ENSGALG00010021786 | 0.801752172 | 0.359536978 |
| ENSGALG00010021788 | 0.856084374 | 0.273613413 |
| ENSGALG00010021789 | 0.889352148 | 0.309089118 |
| ENSGALG00010021790 | 0.150179848 | 0.022381454 |
| ENSGALG00010021791 | 0.987875752 | 0.297316792 |
| ENSGALG00010021792 | 0.97105846  | 0.358684017 |
| ENSGALG00010021793 | 0.376356239 | 0.040919961 |
| ENSGALG00010021794 | 0.769669948 | 0.170925122 |
| ENSGALG00010021795 | 0.849242279 | 0.300035432 |

|                    |             |             |
|--------------------|-------------|-------------|
| ENSGALG00010021796 | 0.208550923 | 0.676301294 |
| ENSGALG00010021797 | 0.661003279 | 0.429537324 |
| ENSGALG00010021798 | 0.35517674  | 0.08512991  |
| ENSGALG00010021799 | 0.938601003 | 0.329248996 |
| ENSGALG00010021800 | 0.96787262  | 0.403100937 |
| ENSGALG00010021801 | 0.84872831  | 0.372593007 |
| ENSGALG00010021803 | 0.824964879 | 0.20099551  |
| ENSGALG00010021805 | 0.130761128 | 0.433881428 |
| ENSGALG00010021807 | 0.951839822 | 0.273607856 |
| ENSGALG00010021808 | 0.586890164 | 0.154015663 |
| ENSGALG00010021809 | 0.098711169 | 0.292522257 |
| ENSGALG00010021810 | 0.982391715 | 0.336503623 |
| ENSGALG00010021812 | 0.879386015 | 0.227850334 |
| ENSGALG00010021813 | 0.967343929 | 0.325509367 |
| ENSGALG00010021816 | 0.319027225 | 0.065581945 |
| ENSGALG00010021817 | 0.944017349 | 0.318316094 |
| ENSGALG00010021818 | 0.895261024 | 0.178031987 |
| ENSGALG00010021819 | 0.906079281 | 0.413762036 |
| ENSGALG00010021820 | 0.465469044 | 0.191936734 |
| ENSGALG00010021821 | 0.974987581 | 0.328443408 |
| ENSGALG00010021823 | 0.133066531 | 0.094016123 |
| ENSGALG00010021825 | 0.990438954 | 0.337514295 |
| ENSGALG00010021826 | 0.993751793 | 0.346442621 |
| ENSGALG00010021827 | 0.877799907 | 0.392126081 |
| ENSGALG00010021829 | 0.502949535 | 0.224604419 |
| ENSGALG00010021831 | 0.499630621 | 0.01576159  |
| ENSGALG00010021832 | 0.405321009 | 0.397160722 |
| ENSGALG00010021834 | 0.265558089 | 0.028821141 |
| ENSGALG00010021835 | 0.041884014 | 0.070068395 |
| ENSGALG00010021837 | 0.089090811 | 0.17241992  |
| ENSGALG00010021838 | 0.318434782 | 0.008370214 |
| ENSGALG00010021839 | 0.353535039 | 0.130781335 |
| ENSGALG00010021840 | 0.176832663 | 0.193967005 |
| ENSGALG00010021841 | 0.614127319 | 0.371794761 |
| ENSGALG00010021842 | 0.437775118 | 0.38052896  |
| ENSGALG00010021843 | 0.945835228 | 0.317020013 |
| ENSGALG00010021844 | 0.352052777 | 0.170637509 |
| ENSGALG00010021846 | 0.424243998 | 0.135578444 |
| ENSGALG00010021847 | 0.75120015  | 0.246481328 |
| ENSGALG00010021848 | 0.762298862 | 0.193827528 |
| ENSGALG00010021849 | 0.032901312 | 0.101028217 |
| ENSGALG00010021850 | 0.259861278 | 0.049935416 |
| ENSGALG00010021851 | 0.795689766 | 0.248825597 |
| ENSGALG00010021853 | 0.961697457 | 0.30622826  |
| ENSGALG00010021854 | 0.858281959 | 0.226668746 |
| ENSGALG00010021856 | 0.203991683 | 0.058221925 |
| ENSGALG00010021860 | 0.26802757  | 0.428800267 |
| ENSGALG00010021861 | 0.945080816 | 0.229228055 |
| ENSGALG00010021862 | 0.807829126 | 0.246490991 |
| ENSGALG00010021863 | 0.750032913 | 0.225299216 |
| ENSGALG00010021864 | 0.810278676 | 0.158744833 |
| ENSGALG00010021865 | 0.312822111 | 0.367410415 |
| ENSGALG00010021866 | 0.063446542 | 0.053959664 |
| ENSGALG00010021867 | 0.045985391 | 0.177518246 |
| ENSGALG00010021869 | 0.731429485 | 0.414698643 |
| ENSGALG00010021870 | 0.548728997 | 0.264720413 |



|                    |             |             |
|--------------------|-------------|-------------|
| ENSGALG00010021871 | 0.996189042 | 0.343415978 |
| ENSGALG00010021874 | 0.85844692  | 0.208890137 |
| ENSGALG00010021875 | 0.370493859 | 0.13155368  |
| ENSGALG00010021876 | 0.054255029 | 0.496773776 |
| ENSGALG00010021877 | 0.940366579 | 0.283475083 |
| ENSGALG00010021879 | 0.308927052 | 0.069480796 |
| ENSGALG00010021880 | 0.492260278 | 0.418948462 |
| ENSGALG00010021881 | 0.711868313 | 0.222622212 |
| ENSGALG00010021883 | 0.460011653 | 0.315823706 |
| ENSGALG00010021885 | 0.550570079 | 0.3928606   |
| ENSGALG00010021886 | 0.600100322 | 0.280917506 |
| ENSGALG00010021887 | 0.962479636 | 0.279196345 |
| ENSGALG00010021888 | 0.631449021 | 0.107638888 |
| ENSGALG00010021889 | 0.013863674 | 0.10879459  |
| ENSGALG00010021890 | 0.143647229 | 0.247379516 |
| ENSGALG00010021892 | 0.815840805 | 0.245347914 |
| ENSGALG00010021893 | 0.695320439 | 0.018567225 |
| ENSGALG00010021897 | 0.843218659 | 0.15661911  |
| ENSGALG00010021898 | 0.390688024 | 0.154376612 |
| ENSGALG00010021899 | 0.05197934  | 0.14495833  |
| ENSGALG00010021900 | 0.352449399 | 0.037405458 |
| ENSGALG00010021902 | 0.846020863 | 0.391911396 |
| ENSGALG00010021903 | 0.492572949 | 0.221509938 |
| ENSGALG00010021905 | 0.198313271 | 0.151397209 |
| ENSGALG00010021906 | 0.426196799 | 0.104791432 |
| ENSGALG00010021908 | 0.823888848 | 0.285338239 |
| ENSGALG00010021910 | 0.350431973 | 0.357190512 |
| ENSGALG00010021912 | 0.035682459 | 0.136951644 |
| ENSGALG00010021913 | 0.884635678 | 0.237073551 |
| ENSGALG00010021916 | 0.770834239 | 0.253411407 |
| ENSGALG00010021918 | 0.45921958  | 0.192543902 |
| ENSGALG00010021919 | 0.817910982 | 0.192555359 |
| ENSGALG00010021921 | 0.030780691 | 0.19932702  |
| ENSGALG00010021922 | 0.922158673 | 0.265312726 |
| ENSGALG00010021923 | 0.409811515 | 0.212720457 |
| ENSGALG00010021924 | 0.858810409 | 0.359407199 |
| ENSGALG00010021925 | 0.884512198 | 0.326257433 |
| ENSGALG00010021927 | 0.582053862 | 0.090039234 |
| ENSGALG00010021928 | 0.669247895 | 0.13294219  |
| ENSGALG00010021929 | 0.588084591 | 0.101926705 |
| ENSGALG00010021930 | 0.713395728 | 0.028180055 |
| ENSGALG00010021931 | 0.92649192  | 0.351949739 |
| ENSGALG00010021932 | 0.875765425 | 0.311094292 |
| ENSGALG00010021933 | 0.832215033 | 0.254642617 |
| ENSGALG00010021934 | 0.58516767  | 0.113340091 |
| ENSGALG00010021935 | 0.425849182 | 0.368188691 |
| ENSGALG00010021938 | 0.146680991 | 0.102923884 |
| ENSGALG00010021939 | 0.941098926 | 0.359556923 |
| ENSGALG00010021941 | 0.422656453 | 0.211461575 |
| ENSGALG00010021942 | 0.607683692 | 0.126449819 |
| ENSGALG00010021943 | 0.669835223 | 0.063412618 |
| ENSGALG00010021944 | 0.231094662 | 0.151443066 |
| ENSGALG00010021945 | 0.885506092 | 0.348190402 |
| ENSGALG00010021946 | 0.307123807 | 0.205922273 |
| ENSGALG00010021947 | 0.977121539 | 0.309763305 |
| ENSGALG00010021948 | 0.910489644 | 0.295264563 |

|                    |             |             |
|--------------------|-------------|-------------|
| ENSGALG00010021949 | 0.515559139 | 0.093972472 |
| ENSGALG00010021950 | 0.643193011 | 0.038801785 |
| ENSGALG00010021951 | 0.673249275 | 0.341184418 |
| ENSGALG00010021952 | 0.854937916 | 0.039052359 |
| ENSGALG00010021953 | 0.024042239 | 0.036913314 |
| ENSGALG00010021957 | 0.376463374 | 0.101862289 |
| ENSGALG00010021958 | 0.829096832 | 0.141581802 |
| ENSGALG00010021960 | 0.960416553 | 0.279832197 |
| ENSGALG00010021961 | 0.946205903 | 0.362951838 |
| ENSGALG00010021962 | 0.126246052 | 0.097988911 |
| ENSGALG00010021963 | 0.705029154 | 0.274467565 |
| ENSGALG00010021965 | 0.500950635 | 0.143403802 |
| ENSGALG00010021966 | 0.516872794 | 0.204609814 |
| ENSGALG00010021967 | 0.252063895 | 0.027194544 |
| ENSGALG00010021968 | 0.461777812 | 0.03487007  |
| ENSGALG00010021969 | 0.554015385 | 0.112943724 |
| ENSGALG00010021970 | 0.94052695  | 0.184668993 |
| ENSGALG00010021971 | 0.849019646 | 0.16248781  |
| ENSGALG00010021972 | 0.965738104 | 0.411926239 |
| ENSGALG00010021973 | 0.607246705 | 0.514974372 |
| ENSGALG00010021974 | 0.387086037 | 0.474139128 |
| ENSGALG00010021975 | 0.633660994 | 0.186123752 |
| ENSGALG00010021976 | 0.28880012  | 0.418789177 |
| ENSGALG00010021978 | 0.412024031 | 0.178760902 |
| ENSGALG00010021979 | 0.277648716 | 0.624295683 |
| ENSGALG00010021980 | 0.697622377 | 0.012649063 |
| ENSGALG00010021983 | 0.743200717 | 0.112555201 |
| ENSGALG00010021984 | 0.290122505 | 0.464993379 |
| ENSGALG00010021986 | 0.551057778 | 0.686989794 |
| ENSGALG00010021987 | 0.943069351 | 0.301688302 |
| ENSGALG00010021988 | 0.886150894 | 0.348430655 |
| ENSGALG00010021989 | 0.100808788 | 0.035591072 |
| ENSGALG00010021990 | 0.948875332 | 0.397641007 |
| ENSGALG00010021991 | 0.475029225 | 0.165477163 |
| ENSGALG00010021992 | 0.896222376 | 0.299813239 |
| ENSGALG00010021994 | 0.505279404 | 0.182452181 |
| ENSGALG00010021995 | 0.927752105 | 0.304437622 |
| ENSGALG00010021996 | 0.355293024 | 0.212466313 |
| ENSGALG00010021998 | 0.255478022 | 0.244308282 |
| ENSGALG00010021999 | 0.846124425 | 0.30394201  |
| ENSGALG00010022000 | 0.618255185 | 0.457775114 |
| ENSGALG00010022001 | 0.976406933 | 0.336704934 |
| ENSGALG00010022002 | 0.335813257 | 0.090432952 |
| ENSGALG00010022003 | 0.002319943 | 0.47043011  |
| ENSGALG00010022005 | 0.255062598 | 0.092778572 |
| ENSGALG00010022006 | 0.949627686 | 0.291324651 |
| ENSGALG00010022007 | 0.385574031 | 0.058624199 |
| ENSGALG00010022008 | 0.567937867 | 0.154970481 |
| ENSGALG00010022011 | 0.251164052 | 0.19860548  |
| ENSGALG00010022012 | 0.479249347 | 0.150800206 |
| ENSGALG00010022013 | 0.572332987 | 0.050647526 |
| ENSGALG00010022014 | 0.385953062 | 0.133261917 |
| ENSGALG00010022015 | 0.53528178  | 0.386809451 |
| ENSGALG00010022017 | 0.350975867 | 0.03147439  |
| ENSGALG00010022019 | 0.147671754 | 0.104310724 |
| ENSGALG00010022020 | 0.203991683 | 0.058221925 |

|                    |             |             |
|--------------------|-------------|-------------|
| ENSGALG00010022021 | 0.841205999 | 0.204547933 |
| ENSGALG00010022022 | 0.073307264 | 0.231459874 |
| ENSGALG00010022023 | 0.27332741  | 0.290269067 |
| ENSGALG00010022024 | 0.922668501 | 0.275876309 |
| ENSGALG00010022025 | 0.600563398 | 0.190472907 |
| ENSGALG00010022026 | 0.495164822 | 0.62246793  |
| ENSGALG00010022027 | 0.497818118 | 0.010178143 |
| ENSGALG00010022028 | 0.000781198 | 0.136542139 |
| ENSGALG00010022029 | 0.27602972  | 0.126880626 |
| ENSGALG00010022030 | 0.653596109 | 0.327451007 |
| ENSGALG00010022032 | 0.885257881 | 0.284209482 |
| ENSGALG00010022033 | 0.952455593 | 0.214931165 |
| ENSGALG00010022034 | 0.978243474 | 0.315976026 |
| ENSGALG00010022035 | 0.290587188 | 0.257419453 |
| ENSGALG00010022036 | 0.388899421 | 0.120062276 |
| ENSGALG00010022037 | 0.964350206 | 0.264254291 |
| ENSGALG00010022038 | 0.99718835  | 0.329779406 |
| ENSGALG00010022039 | 0.009934226 | 0.071417744 |
| ENSGALG00010022040 | 0.367689286 | 0.134680195 |
| ENSGALG00010022041 | 0.963815688 | 0.288213837 |
| ENSGALG00010022042 | 0.901797274 | 0.421482963 |
| ENSGALG00010022043 | 0.356429521 | 0.314833398 |
| ENSGALG00010022044 | 0.068152449 | 0.075241904 |
| ENSGALG00010022046 | 0.700240438 | 0.018678678 |
| ENSGALG00010022047 | 0.066331228 | 0.219417363 |
| ENSGALG00010022048 | 0.661026369 | 0.371277264 |
| ENSGALG00010022049 | 0.751142592 | 0.282548061 |
| ENSGALG00010022050 | 0.612861148 | 0.283379033 |
| ENSGALG00010022051 | 0.959370298 | 0.368124679 |
| ENSGALG00010022052 | 0.807701703 | 0.110674965 |
| ENSGALG00010022053 | 0.959500226 | 0.205173968 |
| ENSGALG00010022054 | 0.932950009 | 0.427929706 |
| ENSGALG00010022055 | 0.809796941 | 0.094314108 |
| ENSGALG00010022056 | 0.584241619 | 0.153182535 |
| ENSGALG00010022057 | 0.493036158 | 0.357625766 |
| ENSGALG00010022058 | 0.791463746 | 0.067146789 |
| ENSGALG00010022059 | 0.83250014  | 0.353324118 |
| ENSGALG00010022061 | 0.8067515   | 0.407220685 |
| ENSGALG00010022062 | 0.975509959 | 0.222267109 |
| ENSGALG00010022063 | 0.786322587 | 0.170507773 |
| ENSGALG00010022065 | 0.483002407 | 0.071835726 |
| ENSGALG00010022066 | 0.721329599 | 0.248360955 |
| ENSGALG00010022067 | 0.44768085  | 0.324207462 |
| ENSGALG00010022069 | 0.85559188  | 0.380347277 |
| ENSGALG00010022070 | 0.050344777 | 0.078939408 |
| ENSGALG00010022071 | 0.833904389 | 0.118283473 |
| ENSGALG00010022072 | 0.882517297 | 0.194528728 |
| ENSGALG00010022073 | 0.970574072 | 0.26967401  |
| ENSGALG00010022076 | 0.99083777  | 0.274762493 |
| ENSGALG00010022078 | 0.90222255  | 0.234716428 |
| ENSGALG00010022079 | 0.607691028 | 0.272905295 |
| ENSGALG00010022081 | 0.922911838 | 0.305631467 |
| ENSGALG00010022082 | 0.490394542 | 0.401813326 |
| ENSGALG00010022084 | 0.789975557 | 0.050929306 |
| ENSGALG00010022085 | 0.604719501 | 0.262001713 |
| ENSGALG00010022086 | 0.627483312 | 0.247936486 |

|                    |             |             |
|--------------------|-------------|-------------|
| ENSGALG00010022087 | 0.938141886 | 0.262267643 |
| ENSGALG00010022088 | 0.583043632 | 0.187915471 |
| ENSGALG00010022090 | 0.910928124 | 0.412882943 |
| ENSGALG00010022091 | 0.522487999 | 0.016101952 |
| ENSGALG00010022092 | 0.213849312 | 0.141928425 |
| ENSGALG00010022093 | 0.931986176 | 0.278742004 |
| ENSGALG00010022095 | 0.469098579 | 0.005285232 |
| ENSGALG00010022096 | 0.387850048 | 0.007987487 |
| ENSGALG00010022097 | 0.971030083 | 0.376507469 |
| ENSGALG00010022098 | 0.650037351 | 0.08935652  |
| ENSGALG00010022100 | 0.851038618 | 0.290734892 |
| ENSGALG00010022101 | 0.467810792 | 0.067190185 |
| ENSGALG00010022102 | 0.416084008 | 0.033397578 |
| ENSGALG00010022104 | 0.253815956 | 0.482626714 |
| ENSGALG00010022105 | 0.089327662 | 0.048919637 |
| ENSGALG00010022106 | 0.553530935 | 0.25474138  |
| ENSGALG00010022108 | 0.980043369 | 0.210486589 |
| ENSGALG00010022110 | 0.158978089 | 0.103816627 |
| ENSGALG00010022111 | 0.742644896 | 0.379220601 |
| ENSGALG00010022112 | 0.300683727 | 0.461762941 |
| ENSGALG00010022113 | 0.282145715 | 0.223348484 |
| ENSGALG00010022114 | 0.57647334  | 0.080690695 |
| ENSGALG00010022115 | 0.323773569 | 0.131260756 |
| ENSGALG00010022116 | 0.979001005 | 0.306596754 |
| ENSGALG00010022117 | 0.915573627 | 0.422478829 |
| ENSGALG00010022118 | 0.119471243 | 0.208742735 |
| ENSGALG00010022119 | 0.814868148 | 0.340697366 |
| ENSGALG00010022120 | 0.193167071 | 0.283934491 |
| ENSGALG00010022121 | 0.383549736 | 0.180028334 |
| ENSGALG00010022122 | 0.910462102 | 0.395799779 |
| ENSGALG00010022124 | 0.12980523  | 0.009072357 |
| ENSGALG00010022125 | 0.976724702 | 0.288114634 |
| ENSGALG00010022128 | 0.956924396 | 0.336137348 |
| ENSGALG00010022129 | 0.969426712 | 0.389166755 |
| ENSGALG00010022130 | 0.364639449 | 0.209777265 |
| ENSGALG00010022134 | 0.388183575 | 0.081314947 |
| ENSGALG00010022135 | 0.912258499 | 0.348912552 |
| ENSGALG00010022136 | 0.498082113 | 0.194392333 |
| ENSGALG00010022137 | 0.921264672 | 0.242399863 |
| ENSGALG00010022138 | 0.866789602 | 0.275090368 |
| ENSGALG00010022141 | 0.939077175 | 0.308352302 |
| ENSGALG00010022142 | 0.812939146 | 0.152477614 |
| ENSGALG00010022143 | 0.704363463 | 0.392192549 |
| ENSGALG00010022144 | 0.992450987 | 0.336703761 |
| ENSGALG00010022145 | 0.990777323 | 0.328949948 |
| ENSGALG00010022146 | 0.268686642 | 0.236683914 |
| ENSGALG00010022148 | 0.750982319 | 0.210067972 |
| ENSGALG00010022149 | 0.961756573 | 0.31835012  |
| ENSGALG00010022150 | 0.244264081 | 0.308326511 |
| ENSGALG00010022151 | 0.976999606 | 0.326424257 |
| ENSGALG00010022152 | 0.970854051 | 0.386461739 |
| ENSGALG00010022154 | 0.82978689  | 0.449537554 |
| ENSGALG00010022157 | 0.974223162 | 0.280181042 |
| ENSGALG00010022158 | 0.590378303 | 0.12785401  |
| ENSGALG00010022159 | 0.889875256 | 0.337190504 |
| ENSGALG00010022160 | 0.374225086 | 0.079757343 |

|                    |             |             |
|--------------------|-------------|-------------|
| ENSGALG00010022161 | 0.891681801 | 0.245617493 |
| ENSGALG00010022162 | 0.651247568 | 0.106190977 |
| ENSGALG00010022164 | 0.982851581 | 0.389303752 |
| ENSGALG00010022165 | 0.975497701 | 0.36498611  |
| ENSGALG00010022166 | 0.910285541 | 0.254898273 |
| ENSGALG00010022167 | 0.544254101 | 0.265682684 |
| ENSGALG00010022168 | 0.445181481 | 0.314904609 |
| ENSGALG00010022169 | 0.698488616 | 0.045566584 |
| ENSGALG00010022170 | 0.906636295 | 0.391298239 |
| ENSGALG00010022171 | 0.947462007 | 0.225669115 |
| ENSGALG00010022172 | 0.872084724 | 0.302872438 |
| ENSGALG00010022173 | 0.943509219 | 0.305546125 |
| ENSGALG00010022174 | 0.912449401 | 0.3630775   |
| ENSGALG00010022175 | 0.645847651 | 0.662281891 |
| ENSGALG00010022176 | 0.370139014 | 0.175677182 |
| ENSGALG00010022178 | 0.686617267 | 0.397622637 |
| ENSGALG00010022179 | 0.022131436 | 0.198334219 |
| ENSGALG00010022180 | 0.256514663 | 0.19972267  |
| ENSGALG00010022181 | 0.916020408 | 0.399646947 |
| ENSGALG00010022182 | 0.873926789 | 0.402728127 |
| ENSGALG00010022184 | 0.89132025  | 0.402214485 |
| ENSGALG00010022186 | 0.936016232 | 0.208757459 |
| ENSGALG00010022187 | 0.189890692 | 0.196551403 |
| ENSGALG00010022188 | 0.266137114 | 0.107784983 |
| ENSGALG00010022189 | 0.040734307 | 0.154016134 |
| ENSGALG00010022190 | 0.932231774 | 0.277932649 |
| ENSGALG00010022192 | 0.270451009 | 0.090541667 |
| ENSGALG00010022193 | 0.218099082 | 0.350254781 |
| ENSGALG00010022194 | 0.923344905 | 0.34951138  |
| ENSGALG00010022195 | 0.240472544 | 0.101172713 |
| ENSGALG00010022196 | 0.357586709 | 0.230180831 |
| ENSGALG00010022199 | 0.969977587 | 0.364279221 |
| ENSGALG00010022200 | 0.816782271 | 0.162086177 |
| ENSGALG00010022202 | 0.865615506 | 0.400024214 |
| ENSGALG00010022203 | 0.616869791 | 0.066218335 |
| ENSGALG00010022204 | 0.574143528 | 0.030424516 |
| ENSGALG00010022205 | 0.975577605 | 0.317218936 |
| ENSGALG00010022206 | 0.719646486 | 0.525206411 |
| ENSGALG00010022207 | 0.955333452 | 0.415418001 |
| ENSGALG00010022208 | 0.269707025 | 0.220966775 |
| ENSGALG00010022209 | 0.101705585 | 0.178318792 |
| ENSGALG00010022210 | 0.750866006 | 0.209140347 |
| ENSGALG00010022211 | 0.991665226 | 0.363429962 |
| ENSGALG00010022213 | 0.969475469 | 0.327834894 |
| ENSGALG00010022214 | 0.934750059 | 0.171439537 |
| ENSGALG00010022215 | 0.210332825 | 0.16260767  |
| ENSGALG00010022216 | 0.933860799 | 0.134617048 |
| ENSGALG00010022217 | 0.853457129 | 0.132133387 |
| ENSGALG00010022218 | 0.985223851 | 0.338866267 |
| ENSGALG00010022219 | 0.622707764 | 0.181163539 |
| ENSGALG00010022220 | 0.727382172 | 0.446879856 |
| ENSGALG00010022221 | 0.75139707  | 0.418974503 |
| ENSGALG00010022222 | 0.927075057 | 0.325877254 |
| ENSGALG00010022223 | 0.682661686 | 0.072157326 |
| ENSGALG00010022224 | 0.222597248 | 0.14781795  |
| ENSGALG00010022225 | 0.601829022 | 0.025433818 |

|                    |             |             |
|--------------------|-------------|-------------|
| ENSGALG00010022226 | 0.769521454 | 0.307867885 |
| ENSGALG00010022227 | 0.625613846 | 0.334109761 |
| ENSGALG00010022228 | 0.686516312 | 0.430297589 |
| ENSGALG00010022229 | 0.985193668 | 0.315766804 |
| ENSGALG00010022230 | 0.984181289 | 0.344484149 |
| ENSGALG00010022231 | 0.924408321 | 0.368044832 |
| ENSGALG00010022232 | 0.456071243 | 0.425928717 |
| ENSGALG00010022233 | 0.975645258 | 0.361439219 |
| ENSGALG00010022234 | 0.859490614 | 0.444155133 |
| ENSGALG00010022235 | 0.913521919 | 0.39318058  |
| ENSGALG00010022236 | 0.995785403 | 0.327076585 |
| ENSGALG00010022237 | 0.707975938 | 0.483318757 |
| ENSGALG00010022238 | 0.974916981 | 0.33309875  |
| ENSGALG00010022239 | 0.656969114 | 0.115316856 |
| ENSGALG00010022240 | 0.964092926 | 0.367508328 |
| ENSGALG00010022241 | 0.975038082 | 0.314224807 |
| ENSGALG00010022242 | 0.979496099 | 0.318107374 |
| ENSGALG00010022243 | 0.966586631 | 0.315864929 |
| ENSGALG00010022244 | 0.889932018 | 0.146108002 |
| ENSGALG00010022245 | 0.777334018 | 0.357797189 |
| ENSGALG00010022246 | 0.144987931 | 0.283241891 |
| ENSGALG00010022247 | 0.641543723 | 0.150422361 |
| ENSGALG00010022248 | 0.400007934 | 0.244327522 |
| ENSGALG00010022249 | 0.658672581 | 0.363363708 |
| ENSGALG00010022250 | 0.951423022 | 0.31892453  |
| ENSGALG00010022251 | 0.005910663 | 0.01624284  |
| ENSGALG00010022252 | 0.978903216 | 0.317268271 |
| ENSGALG00010022253 | 0.98821483  | 0.30958834  |
| ENSGALG00010022255 | 0.957271831 | 0.265699146 |
| ENSGALG00010022256 | 0.974415458 | 0.283964986 |
| ENSGALG00010022257 | 0.396668506 | 0.181671381 |
| ENSGALG00010022258 | 0.725856871 | 0.003790952 |
| ENSGALG00010022259 | 0.919252004 | 0.31579109  |
| ENSGALG00010022260 | 0.241258347 | 0.184127043 |
| ENSGALG00010022261 | 0.669916022 | 0.207587907 |
| ENSGALG00010022264 | 0.739234101 | 0.325448794 |
| ENSGALG00010022266 | 0.776835318 | 0.50506669  |
| ENSGALG00010022267 | 0.862667774 | 0.17760325  |
| ENSGALG00010022269 | 0.041614593 | 0.239061706 |
| ENSGALG00010022270 | 0.947771168 | 0.31073342  |
| ENSGALG00010022271 | 0.713073607 | 0.654507716 |
| ENSGALG00010022273 | 0.819482721 | 0.312633297 |
| ENSGALG00010022274 | 0.189364163 | 0.181211771 |
| ENSGALG00010022275 | 0.97417542  | 0.294326463 |
| ENSGALG00010022276 | 0.88116101  | 0.197292539 |
| ENSGALG00010022277 | 0.145445488 | 0.107454263 |
| ENSGALG00010022278 | 0.93616591  | 0.357633628 |
| ENSGALG00010022279 | 0.744246465 | 0.380948149 |
| ENSGALG00010022280 | 0.969672065 | 0.265997283 |
| ENSGALG00010022281 | 0.737348247 | 0.239326458 |
| ENSGALG00010022282 | 0.890209248 | 0.376789707 |
| ENSGALG00010022284 | 0.879744983 | 0.323525604 |
| ENSGALG00010022287 | 0.939642238 | 0.333895175 |
| ENSGALG00010022290 | 0.990005169 | 0.318012793 |
| ENSGALG00010022293 | 0.748050298 | 0.113186454 |
| ENSGALG00010022294 | 0.521438226 | 0.269844322 |

|                    |             |             |
|--------------------|-------------|-------------|
| ENSGALG00010022296 | 0.923667192 | 0.310577614 |
| ENSGALG00010022297 | 0.520391138 | 0.289523629 |
| ENSGALG00010022299 | 0.633258398 | 0.305677408 |
| ENSGALG00010022301 | 0.339323922 | 0.227455498 |
| ENSGALG00010022302 | 0.980186261 | 0.335393202 |
| ENSGALG00010022303 | 0.994460472 | 0.296011847 |
| ENSGALG00010022304 | 0.953539299 | 0.391777045 |
| ENSGALG00010022305 | 0.40135901  | 0.158038591 |
| ENSGALG00010022306 | 0.988857596 | 0.313837384 |
| ENSGALG00010022307 | 0.990687384 | 0.299210477 |
| ENSGALG00010022308 | 0.84365877  | 0.262839276 |
| ENSGALG00010022309 | 0.635961725 | 0.269284966 |
| ENSGALG00010022310 | 0.779987134 | 0.013138033 |
| ENSGALG00010022311 | 0.855461004 | 0.267353434 |
| ENSGALG00010022312 | 0.696021308 | 0.379880454 |
| ENSGALG00010022313 | 0.391378541 | 0.014984304 |
| ENSGALG00010022314 | 0.90990876  | 0.286228272 |
| ENSGALG00010022315 | 0.947276802 | 0.298484905 |
| ENSGALG00010022316 | 0.907972356 | 0.216102883 |
| ENSGALG00010022317 | 0.643108019 | 0.051846046 |
| ENSGALG00010022318 | 0.455456485 | 0.121318594 |
| ENSGALG00010022319 | 0.39198709  | 0.383967097 |
| ENSGALG00010022320 | 0.792541607 | 0.361651275 |
| ENSGALG00010022322 | 0.682988081 | 0.300277043 |
| ENSGALG00010022323 | 0.992141266 | 0.32810647  |
| ENSGALG00010022324 | 0.201433424 | 0.235000413 |
| ENSGALG00010022325 | 0.8231569   | 0.560185112 |
| ENSGALG00010022326 | 0.752776048 | 0.219777058 |
| ENSGALG00010022327 | 0.798956077 | 0.105398444 |
| ENSGALG00010022328 | 0.559126594 | 0.019511555 |
| ENSGALG00010022329 | 0.886350224 | 0.355821577 |
| ENSGALG00010022330 | 0.98038129  | 0.317351    |
| ENSGALG00010022331 | 0.136216199 | 0.22288475  |
| ENSGALG00010022332 | 0.593140392 | 0.033683697 |
| ENSGALG00010022333 | 0.843405955 | 0.245082421 |
| ENSGALG00010022334 | 0.555478268 | 0.360193454 |
| ENSGALG00010022335 | 0.264239718 | 0.073427965 |
| ENSGALG00010022338 | 0.39190877  | 0.131701825 |
| ENSGALG00010022340 | 0.900116117 | 0.392833001 |
| ENSGALG00010022341 | 0.113650382 | 0.043890876 |
| ENSGALG00010022343 | 0.976586525 | 0.250552486 |
| ENSGALG00010022345 | 0.99027851  | 0.3021248   |
| ENSGALG00010022347 | 0.938645008 | 0.333330184 |
| ENSGALG00010022348 | 0.993192524 | 0.335503881 |
| ENSGALG00010022352 | 0.374974364 | 0.078620432 |
| ENSGALG00010022353 | 0.949547088 | 0.310917945 |
| ENSGALG00010022354 | 0.482590919 | 0.137131017 |
| ENSGALG00010022355 | 0.350983868 | 0.128157198 |
| ENSGALG00010022356 | 0.608552769 | 0.306019088 |
| ENSGALG00010022357 | 0.978063827 | 0.327874841 |
| ENSGALG00010022358 | 0.307242338 | 0.098889492 |
| ENSGALG00010022359 | 0.842422519 | 0.209967835 |
| ENSGALG00010022360 | 0.290122505 | 0.464993379 |
| ENSGALG00010022361 | 0.622443595 | 0.469258101 |
| ENSGALG00010022363 | 0.525823237 | 0.117324086 |
| ENSGALG00010022365 | 0.223883554 | 0.140808323 |

|                    |             |             |
|--------------------|-------------|-------------|
| ENSGALG00010022366 | 0.861870419 | 0.206520899 |
| ENSGALG00010022368 | 0.38718504  | 0.101838932 |
| ENSGALG00010022370 | 0.366356945 | 0.080496265 |
| ENSGALG00010022373 | 0.345733183 | 0.771407729 |
| ENSGALG00010022375 | 0.426397163 | 0.22810538  |
| ENSGALG00010022377 | 0.8551441   | 0.279599837 |
| ENSGALG00010022378 | 0.262922434 | 0.138601464 |
| ENSGALG00010022379 | 0.540215559 | 0.073412036 |
| ENSGALG00010022381 | 0.265558089 | 0.028821141 |
| ENSGALG00010022383 | 0.337350312 | 0.486558046 |
| ENSGALG00010022385 | 0.305262806 | 0.293907863 |
| ENSGALG00010022386 | 0.981503687 | 0.308435213 |
| ENSGALG00010022388 | 0.977847833 | 0.310338925 |
| ENSGALG00010022391 | 0.008936839 | 0.090201086 |
| ENSGALG00010022392 | 0.935254381 | 0.356759742 |
| ENSGALG00010022393 | 0.192752914 | 0.375098429 |
| ENSGALG00010022395 | 0.937766495 | 0.331582308 |
| ENSGALG00010022396 | 0.034383068 | 0.018800754 |
| ENSGALG00010022397 | 0.895932097 | 0.178714455 |
| ENSGALG00010022400 | 0.66580992  | 0.367788904 |
| ENSGALG00010022401 | 0.98351587  | 0.28754461  |
| ENSGALG00010022403 | 0.277566769 | 0.107857127 |
| ENSGALG00010022404 | 0.379394869 | 0.170237467 |
| ENSGALG00010022406 | 0.975630584 | 0.284537412 |
| ENSGALG00010022407 | 0.967336612 | 0.28822511  |
| ENSGALG00010022408 | 0.38321826  | 0.113113547 |
| ENSGALG00010022409 | 0.992792049 | 0.342916413 |
| ENSGALG00010022411 | 0.820053593 | 0.152724833 |
| ENSGALG00010022412 | 0.300848163 | 0.101461559 |
| ENSGALG00010022414 | 0.650496204 | 0.129956994 |
| ENSGALG00010022415 | 0.978332848 | 0.393260053 |
| ENSGALG00010022416 | 0.956199455 | 0.303667957 |
| ENSGALG00010022417 | 0.142182469 | 0.149983465 |
| ENSGALG00010022418 | 0.328351802 | 0.128015076 |
| ENSGALG00010022419 | 0.406706929 | 0.075613654 |
| ENSGALG00010022420 | 0.07133679  | 0.180876351 |
| ENSGALG00010022421 | 0.885647585 | 0.079245339 |
| ENSGALG00010022422 | 0.980668122 | 0.350374982 |
| ENSGALG00010022423 | 0.422279618 | 0.252990097 |
| ENSGALG00010022425 | 0.073389205 | 0.182303476 |
| ENSGALG00010022426 | 0.452220863 | 0.225003423 |
| ENSGALG00010022427 | 0.827283769 | 0.282153368 |
| ENSGALG00010022428 | 0.395556858 | 0.102965232 |
| ENSGALG00010022429 | 0.978777865 | 0.320702697 |
| ENSGALG00010022430 | 0.168643922 | 0.317071488 |
| ENSGALG00010022431 | 0.977315388 | 0.284166418 |
| ENSGALG00010022433 | 0.980457876 | 0.332682399 |
| ENSGALG00010022435 | 0.938304325 | 0.394290287 |
| ENSGALG00010022436 | 0.142280769 | 0.281419068 |
| ENSGALG00010022437 | 0.347664293 | 0.093632472 |
| ENSGALG00010022438 | 0.936279662 | 0.233944789 |
| ENSGALG00010022439 | 0.833878649 | 0.348157006 |
| ENSGALG00010022440 | 0.927896242 | 0.239680879 |
| ENSGALG00010022441 | 0.828274891 | 0.148049572 |
| ENSGALG00010022443 | 0.08188551  | 0.154726792 |
| ENSGALG00010022444 | 0.485424642 | 0.161671104 |



|                    |             |             |
|--------------------|-------------|-------------|
| ENSGALG00010022445 | 0.059539862 | 0.180376229 |
| ENSGALG00010022446 | 0.385118354 | 0.132533137 |
| ENSGALG00010022448 | 0.53022471  | 0.001125904 |
| ENSGALG00010022449 | 0.307896896 | 0.108693604 |
| ENSGALG00010022450 | 0.848358054 | 0.158647341 |
| ENSGALG00010022451 | 0.942871909 | 0.213283369 |
| ENSGALG00010022452 | 0.541129039 | 0.160298772 |
| ENSGALG00010022453 | 0.8980627   | 0.311071574 |
| ENSGALG00010022454 | 0.925093288 | 0.261855754 |
| ENSGALG00010022455 | 0.847567089 | 0.101395633 |
| ENSGALG00010022456 | 0.689741309 | 0.40865989  |
| ENSGALG00010022458 | 0.019712204 | 0.418846563 |
| ENSGALG00010022459 | 0.502122009 | 0.474299492 |
| ENSGALG00010022460 | 0.956572573 | 0.266896607 |
| ENSGALG00010022462 | 0.31126492  | 0.041654644 |
| ENSGALG00010022463 | 0.827860901 | 0.35796764  |
| ENSGALG00010022464 | 0.010994392 | 0.115336973 |
| ENSGALG00010022465 | 0.583676413 | 0.228984121 |
| ENSGALG00010022466 | 0.655526408 | 0.088702673 |
| ENSGALG00010022467 | 0.922412961 | 0.291659367 |
| ENSGALG00010022468 | 0.928633898 | 0.377676033 |
| ENSGALG00010022469 | 0.478056432 | 0.184736379 |
| ENSGALG00010022470 | 0.967012056 | 0.32730341  |
| ENSGALG00010022471 | 0.404535974 | 0.076467456 |
| ENSGALG00010022472 | 0.56002463  | 0.07447504  |
| ENSGALG00010022473 | 0.654803775 | 0.151785787 |
| ENSGALG00010022474 | 0.958905457 | 0.329981431 |
| ENSGALG00010022476 | 0.570776324 | 0.198716506 |
| ENSGALG00010022477 | 0.210604799 | 0.300022113 |
| ENSGALG00010022478 | 0.975342478 | 0.295407245 |
| ENSGALG00010022479 | 0.984503379 | 0.376082186 |
| ENSGALG00010022480 | 0.655082018 | 0.213033851 |
| ENSGALG00010022481 | 0.135038205 | 0.205620754 |
| ENSGALG00010022482 | 0.273936874 | 0.321919722 |
| ENSGALG00010022483 | 0.745687445 | 0.058754426 |
| ENSGALG00010022484 | 0.184616839 | 0.16415848  |
| ENSGALG00010022485 | 0.920510412 | 0.271233252 |
| ENSGALG00010022486 | 0.22235895  | 0.005531054 |
| ENSGALG00010022488 | 0.164478933 | 0.270582683 |
| ENSGALG00010022489 | 0.507545279 | 0.021767074 |
| ENSGALG00010022490 | 0.113459865 | 0.170691905 |
| ENSGALG00010022493 | 0.936043751 | 0.249831672 |
| ENSGALG00010022494 | 0.702206141 | 0.290033586 |
| ENSGALG00010022495 | 0.923713824 | 0.376707    |
| ENSGALG00010022496 | 0.458020087 | 0.084885561 |
| ENSGALG00010022497 | 0.917051739 | 0.184859597 |
| ENSGALG00010022498 | 0.9880771   | 0.324012176 |
| ENSGALG00010022499 | 0.687373871 | 0.348023241 |
| ENSGALG00010022500 | 0.988577947 | 0.317079281 |
| ENSGALG00010022501 | 0.901489209 | 0.32396067  |
| ENSGALG00010022502 | 0.953231149 | 0.291390236 |
| ENSGALG00010022503 | 0.853777074 | 0.031268625 |
| ENSGALG00010022504 | 0.981546128 | 0.317284612 |
| ENSGALG00010022505 | 0.848509651 | 0.126777931 |
| ENSGALG00010022506 | 0.670138558 | 0.036255664 |
| ENSGALG00010022507 | 0.929368703 | 0.188160989 |

|                    |             |             |
|--------------------|-------------|-------------|
| ENSGALG00010022508 | 0.909180865 | 0.336003339 |
| ENSGALG00010022509 | 0.938503794 | 0.321720263 |
| ENSGALG00010022511 | 0.960289225 | 0.260730849 |
| ENSGALG00010022512 | 0.779671013 | 0.613615532 |
| ENSGALG00010022513 | 0.863099666 | 0.240933826 |
| ENSGALG00010022514 | 0.425296556 | 0.09607093  |
| ENSGALG00010022515 | 0.951105521 | 0.289006592 |
| ENSGALG00010022516 | 0.952476784 | 0.270465052 |
| ENSGALG00010022517 | 0.927256386 | 0.263611577 |
| ENSGALG00010022518 | 0.88039188  | 0.394460462 |
| ENSGALG00010022520 | 0.889162421 | 0.255789026 |
| ENSGALG00010022521 | 0.955501308 | 0.294137462 |
| ENSGALG00010022522 | 0.719779281 | 0.197783925 |
| ENSGALG00010022524 | 0.7091124   | 0.386632071 |
| ENSGALG00010022525 | 0.451788251 | 0.00193286  |
| ENSGALG00010022526 | 0.988499471 | 0.322426319 |
| ENSGALG00010022528 | 0.931917651 | 0.386301006 |
| ENSGALG00010022529 | 0.918160739 | 0.277823211 |
| ENSGALG00010022531 | 0.351039436 | 0.15590662  |
| ENSGALG00010022532 | 0.386349697 | 0.164817078 |
| ENSGALG00010022533 | 0.70768849  | 0.174592241 |
| ENSGALG00010022534 | 0.40002651  | 0.04441826  |
| ENSGALG00010022536 | 0.927652652 | 0.298270657 |
| ENSGALG00010022538 | 0.610263678 | 0.078957811 |
| ENSGALG00010022539 | 0.58554549  | 0.069036089 |
| ENSGALG00010022540 | 0.966323632 | 0.364280761 |
| ENSGALG00010022541 | 0.992416323 | 0.280156213 |
| ENSGALG00010022544 | 0.189993433 | 0.116230849 |
| ENSGALG00010022545 | 0.426654555 | 0.234652331 |
| ENSGALG00010022546 | 0.786414822 | 0.246430523 |
| ENSGALG00010022547 | 0.968966044 | 0.272224849 |
| ENSGALG00010022548 | 0.948444701 | 0.322335938 |
| ENSGALG00010022550 | 0.202166268 | 0.193360909 |
| ENSGALG00010022551 | 0.841389821 | 0.028380112 |
| ENSGALG00010022552 | 0.988945066 | 0.28461035  |
| ENSGALG00010022553 | 0.910739974 | 0.199899321 |
| ENSGALG00010022554 | 0.847306506 | 0.167054324 |
| ENSGALG00010022556 | 0.286755814 | 0.501844446 |
| ENSGALG00010022557 | 0.376640253 | 0.024581485 |
| ENSGALG00010022558 | 0.852310422 | 0.435552022 |
| ENSGALG00010022559 | 0.901604185 | 0.248474797 |
| ENSGALG00010022560 | 0.162569977 | 0.295452318 |
| ENSGALG00010022562 | 0.86863777  | 0.316526095 |
| ENSGALG00010022563 | 0.271701261 | 0.072417625 |
| ENSGALG00010022564 | 0.478592401 | 0.003490424 |
| ENSGALG00010022565 | 0.834799771 | 0.216040025 |
| ENSGALG00010022566 | 0.197588125 | 0.17325697  |
| ENSGALG00010022567 | 0.523922383 | 0.359040943 |
| ENSGALG00010022568 | 0.995688189 | 0.318311891 |
| ENSGALG00010022569 | 0.442307023 | 0.454670983 |
| ENSGALG00010022570 | 0.377008934 | 0.178767925 |
| ENSGALG00010022571 | 0.806846233 | 0.416721723 |
| ENSGALG00010022572 | 0.942818777 | 0.260292824 |
| ENSGALG00010022573 | 0.312866467 | 0.233272305 |
| ENSGALG00010022574 | 0.006609734 | 0.234178371 |
| ENSGALG00010022575 | 0.976905959 | 0.353249505 |

|                    |             |             |
|--------------------|-------------|-------------|
| ENSGALG00010022576 | 0.500450145 | 0.200577411 |
| ENSGALG00010022577 | 0.050025814 | 0.364858299 |
| ENSGALG00010022579 | 0.957731943 | 0.230336819 |
| ENSGALG00010022581 | 0.985686551 | 0.314842774 |
| ENSGALG00010022582 | 0.920728767 | 0.270328846 |
| ENSGALG00010022583 | 0.834601401 | 0.239971691 |
| ENSGALG00010022584 | 0.001135721 | 0.491064829 |
| ENSGALG00010022585 | 0.685619368 | 0.030256125 |
| ENSGALG00010022586 | 0.645549306 | 0.138289887 |
| ENSGALG00010022587 | 0.2896197   | 0.603980439 |
| ENSGALG00010022588 | 0.67412518  | 0.155681287 |
| ENSGALG00010022590 | 0.983824584 | 0.33547154  |
| ENSGALG00010022591 | 0.391097471 | 0.144336359 |
| ENSGALG00010022592 | 0.835063097 | 0.332710727 |
| ENSGALG00010022593 | 0.658848673 | 0.326645987 |
| ENSGALG00010022594 | 0.011570714 | 0.087085695 |
| ENSGALG00010022597 | 0.99079094  | 0.337147332 |
| ENSGALG00010022598 | 0.406255908 | 0.242722818 |
| ENSGALG00010022599 | 0.668744317 | 0.242016615 |
| ENSGALG00010022600 | 0.736884248 | 0.084856184 |
| ENSGALG00010022602 | 0.10463914  | 0.225992092 |
| ENSGALG00010022603 | 0.37731953  | 0.44456732  |
| ENSGALG00010022604 | 0.38620775  | 0.086736513 |
| ENSGALG00010022606 | 0.612786315 | 0.531157742 |
| ENSGALG00010022607 | 0.140628138 | 0.409068537 |
| ENSGALG00010022608 | 0.616962232 | 0.395203675 |
| ENSGALG00010022609 | 0.956286694 | 0.319447851 |
| ENSGALG00010022611 | 0.492688894 | 0.725556925 |
| ENSGALG00010022613 | 0.554520902 | 0.253830733 |
| ENSGALG00010022614 | 0.97999837  | 0.277800953 |
| ENSGALG00010022615 | 0.79641214  | 0.00152185  |
| ENSGALG00010022616 | 0.554250638 | 0.270919913 |
| ENSGALG00010022618 | 0.228720766 | 0.143882467 |
| ENSGALG00010022619 | 0.731761422 | 0.314064931 |
| ENSGALG00010022621 | 0.627875824 | 0.334555094 |
| ENSGALG00010022622 | 0.943623966 | 0.293497477 |
| ENSGALG00010022623 | 0.508863299 | 0.142414474 |
| ENSGALG00010022624 | 0.572250264 | 0.327529188 |
| ENSGALG00010022625 | 0.808129734 | 0.191896482 |
| ENSGALG00010022626 | 0.951491834 | 0.326409533 |
| ENSGALG00010022627 | 0.935716839 | 0.301051888 |
| ENSGALG00010022628 | 0.064069694 | 0.430763997 |
| ENSGALG00010022629 | 0.705614295 | 0.363499417 |
| ENSGALG00010022630 | 0.099344815 | 0.178605837 |
| ENSGALG00010022633 | 0.784367921 | 0.200063566 |
| ENSGALG00010022634 | 0.262922434 | 0.138601464 |
| ENSGALG00010022635 | 0.863775532 | 0.209987403 |
| ENSGALG00010022636 | 0.816184737 | 0.23538873  |
| ENSGALG00010022637 | 0.152010125 | 0.213116426 |
| ENSGALG00010022638 | 0.858489817 | 0.178189251 |
| ENSGALG00010022640 | 0.984075722 | 0.287510856 |
| ENSGALG00010022641 | 0.024374485 | 0.442743073 |
| ENSGALG00010022642 | 0.085042597 | 0.005420494 |
| ENSGALG00010022643 | 0.550387836 | 0.295940071 |
| ENSGALG00010022644 | 0.916020042 | 0.32947108  |
| ENSGALG00010022645 | 0.980019863 | 0.292781205 |

|                    |             |             |
|--------------------|-------------|-------------|
| ENSGALG00010022646 | 0.770420494 | 0.283408262 |
| ENSGALG00010022647 | 0.960032622 | 0.336658419 |
| ENSGALG00010022648 | 0.162241107 | 0.114782335 |
| ENSGALG00010022649 | 0.07382069  | 0.083668104 |
| ENSGALG00010022650 | 0.932889778 | 0.320445998 |
| ENSGALG00010022651 | 0.228336748 | 0.204985534 |
| ENSGALG00010022652 | 0.878161852 | 0.230334602 |
| ENSGALG00010022653 | 0.644192458 | 0.293296367 |
| ENSGALG00010022654 | 0.605893084 | 0.266429251 |
| ENSGALG00010022655 | 0.101561507 | 0.144081659 |
| ENSGALG00010022656 | 0.558161394 | 0.408938051 |
| ENSGALG00010022657 | 0.600007988 | 0.033868286 |
| ENSGALG00010022658 | 0.51433486  | 0.101818046 |
| ENSGALG00010022659 | 0.649129838 | 0.325302828 |
| ENSGALG00010022660 | 0.120522951 | 0.143700346 |
| ENSGALG00010022661 | 0.065890588 | 0.321687627 |
| ENSGALG00010022662 | 0.963347771 | 0.292450669 |
| ENSGALG00010022664 | 0.673707329 | 0.076390389 |
| ENSGALG00010022665 | 0.376801121 | 0.142341445 |
| ENSGALG00010022666 | 0.418200955 | 0.203620139 |
| ENSGALG00010022667 | 0.437658353 | 0.382782334 |
| ENSGALG00010022669 | 0.175232246 | 0.381900686 |
| ENSGALG00010022670 | 0.286555462 | 0.078819245 |
| ENSGALG00010022671 | 0.825686895 | 0.323187805 |
| ENSGALG00010022672 | 0.307860476 | 0.247884083 |
| ENSGALG00010022673 | 0.037101857 | 0.023625526 |
| ENSGALG00010022674 | 0.79080706  | 0.288735829 |
| ENSGALG00010022676 | 0.985882586 | 0.304904522 |
| ENSGALG00010022677 | 0.971787249 | 0.360488343 |
| ENSGALG00010022678 | 0.955881917 | 0.388358249 |
| ENSGALG00010022680 | 0.632859768 | 0.159253507 |
| ENSGALG00010022681 | 0.977175    | 0.282893536 |
| ENSGALG00010022682 | 0.989132295 | 0.323748422 |
| ENSGALG00010022683 | 0.339836176 | 0.257377495 |
| ENSGALG00010022684 | 0.705930976 | 0.023783618 |
| ENSGALG00010022685 | 0.64805876  | 0.237489803 |
| ENSGALG00010022689 | 0.545577486 | 0.625173244 |
| ENSGALG00010022690 | 0.719880199 | 0.105123037 |
| ENSGALG00010022691 | 0.615222744 | 0.099648965 |
| ENSGALG00010022695 | 0.949040859 | 0.248641144 |
| ENSGALG00010022696 | 0.285272007 | 0.109169955 |
| ENSGALG00010022697 | 0.770568187 | 0.274515199 |
| ENSGALG00010022698 | 0.927281796 | 0.298883277 |
| ENSGALG00010022699 | 0.820346378 | 0.103809371 |
| ENSGALG00010022700 | 0.32829454  | 0.451866978 |
| ENSGALG00010022702 | 0.521377009 | 0.102311913 |
| ENSGALG00010022703 | 0.258481337 | 0.146910782 |
| ENSGALG00010022704 | 0.361219176 | 0.129630793 |
| ENSGALG00010022705 | 0.993912305 | 0.329764736 |
| ENSGALG00010022707 | 0.9940005   | 0.316948711 |
| ENSGALG00010022708 | 0.916107412 | 0.243282232 |
| ENSGALG00010022709 | 0.941115813 | 0.262372277 |
| ENSGALG00010022710 | 0.161858822 | 0.266359545 |
| ENSGALG00010022711 | 0.489665598 | 0.448707682 |
| ENSGALG00010022712 | 0.885443303 | 0.322134098 |
| ENSGALG00010022715 | 0.875679375 | 0.353323541 |

|                    |             |             |
|--------------------|-------------|-------------|
| ENSGALG00010022717 | 0.924963095 | 0.095438156 |
| ENSGALG00010022718 | 0.892383117 | 0.315437859 |
| ENSGALG00010022719 | 0.154391753 | 0.075137614 |
| ENSGALG00010022722 | 0.189240572 | 0.04996112  |
| ENSGALG00010022723 | 0.468260787 | 0.141962844 |
| ENSGALG00010022724 | 0.264135059 | 0.122428802 |
| ENSGALG00010022725 | 0.08908866  | 0.183956964 |
| ENSGALG00010022726 | 0.799144707 | 0.262800645 |
| ENSGALG00010022727 | 0.969087508 | 0.336424906 |
| ENSGALG00010022728 | 0.54655015  | 0.214551661 |
| ENSGALG00010022731 | 0.944224316 | 0.273684569 |
| ENSGALG00010022732 | 0.542827985 | 0.351003608 |
| ENSGALG00010022733 | 0.926552568 | 0.404825858 |
| ENSGALG00010022734 | 0.956221411 | 0.348088537 |
| ENSGALG00010022735 | 0.666171994 | 0.176556353 |
| ENSGALG00010022736 | 0.286799024 | 0.210879307 |
| ENSGALG00010022737 | 0.819304669 | 0.382205126 |
| ENSGALG00010022738 | 0.598002198 | 0.426835949 |
| ENSGALG00010022739 | 0.465513101 | 0.118017327 |
| ENSGALG00010022740 | 0.815375053 | 0.115467016 |
| ENSGALG00010022741 | 0.969977782 | 0.259822799 |
| ENSGALG00010022742 | 0.139877562 | 0.35493793  |
| ENSGALG00010022743 | 0.868794912 | 0.48200002  |
| ENSGALG00010022745 | 0.976263215 | 0.359720692 |
| ENSGALG00010022746 | 0.710551534 | 0.156573694 |
| ENSGALG00010022747 | 0.900508102 | 0.327246939 |
| ENSGALG00010022748 | 0.549059156 | 0.633864384 |
| ENSGALG00010022749 | 0.659181032 | 0.39575394  |
| ENSGALG00010022751 | 0.98712403  | 0.359426282 |
| ENSGALG00010022754 | 0.552821432 | 0.350880231 |
| ENSGALG00010022755 | 0.936187615 | 0.356813624 |
| ENSGALG00010022756 | 0.102845326 | 0.156156484 |
| ENSGALG00010022759 | 0.89631143  | 0.208706726 |
| ENSGALG00010022760 | 0.106320184 | 0.296519917 |
| ENSGALG00010022761 | 0.764570267 | 0.15188003  |
| ENSGALG00010022763 | 0.252191774 | 0.795988502 |
| ENSGALG00010022764 | 0.951421753 | 0.394879997 |
| ENSGALG00010022765 | 0.044037286 | 0.232480103 |
| ENSGALG00010022766 | 0.502531638 | 0.246552155 |
| ENSGALG00010022767 | 0.248066728 | 0.116800122 |
| ENSGALG00010022768 | 0.562295553 | 0.165128148 |
| ENSGALG00010022769 | 0.990521837 | 0.363099832 |
| ENSGALG00010022770 | 0.557692005 | 0.281513255 |
| ENSGALG00010022771 | 0.910248994 | 0.325126813 |
| ENSGALG00010022772 | 0.477671531 | 0.320145305 |
| ENSGALG00010022774 | 0.997640949 | 0.344707343 |
| ENSGALG00010022776 | 0.947427651 | 0.30974598  |
| ENSGALG00010022778 | 0.865425903 | 0.110318597 |
| ENSGALG00010022780 | 0.21633306  | 0.098502548 |
| ENSGALG00010022781 | 0.845146134 | 0.385931265 |
| ENSGALG00010022782 | 0.895120865 | 0.456461942 |
| ENSGALG00010022783 | 0.911092143 | 0.144260996 |
| ENSGALG00010022784 | 0.489856264 | 0.121819625 |
| ENSGALG00010022785 | 0.910495624 | 0.238723728 |
| ENSGALG00010022786 | 0.808133056 | 0.235946414 |
| ENSGALG00010022787 | 0.927851046 | 0.43841685  |

|                    |             |             |
|--------------------|-------------|-------------|
| ENSGALG00010022788 | 0.840668245 | 0.40675518  |
| ENSGALG00010022789 | 0.962991607 | 0.27512788  |
| ENSGALG00010022790 | 0.887981856 | 0.537412741 |
| ENSGALG00010022791 | 0.924703174 | 0.384970727 |
| ENSGALG00010022792 | 0.839959871 | 0.36487897  |
| ENSGALG00010022793 | 0.498524812 | 0.23012935  |
| ENSGALG00010022795 | 0.720556051 | 0.244475131 |
| ENSGALG00010022796 | 0.385217368 | 0.300564124 |
| ENSGALG00010022797 | 0.960399898 | 0.253363963 |
| ENSGALG00010022798 | 0.664000664 | 0.16292465  |
| ENSGALG00010022799 | 0.441674678 | 0.455774693 |
| ENSGALG00010022800 | 0.848603515 | 0.101614898 |
| ENSGALG00010022801 | 0.928442468 | 0.36383382  |
| ENSGALG00010022802 | 0.546330823 | 0.237820109 |
| ENSGALG00010022803 | 0.293723519 | 0.344691562 |
| ENSGALG00010022804 | 0.822676349 | 0.027198901 |
| ENSGALG00010022805 | 0.524257857 | 0.05415808  |
| ENSGALG00010022806 | 0.984000803 | 0.327529753 |
| ENSGALG00010022807 | 0.751169046 | 0.453153807 |
| ENSGALG00010022808 | 0.87643212  | 0.262643037 |
| ENSGALG00010022809 | 0.930442145 | 0.319082299 |
| ENSGALG00010022810 | 0.716041583 | 0.272113302 |
| ENSGALG00010022811 | 0.769864345 | 0.085126852 |
| ENSGALG00010022812 | 0.851422106 | 0.315100004 |
| ENSGALG00010022813 | 0.954415351 | 0.325096141 |
| ENSGALG00010022814 | 0.238850225 | 0.196690181 |
| ENSGALG00010022815 | 0.961523125 | 0.288224384 |
| ENSGALG00010022816 | 0.828673843 | 0.121500824 |
| ENSGALG00010022818 | 0.78066525  | 0.441886264 |
| ENSGALG00010022819 | 0.990503483 | 0.332585955 |
| ENSGALG00010022820 | 0.96615109  | 0.331147459 |
| ENSGALG00010022821 | 0.995248824 | 0.336502161 |
| ENSGALG00010022822 | 0.897523457 | 0.224781145 |
| ENSGALG00010022823 | 0.965164985 | 0.210936558 |
| ENSGALG00010022824 | 0.329947021 | 0.165781736 |
| ENSGALG00010022825 | 0.960770428 | 0.262854353 |
| ENSGALG00010022826 | 0.065172727 | 0.136778041 |
| ENSGALG00010022827 | 0.884532006 | 0.274608053 |
| ENSGALG00010022828 | 0.857460989 | 0.220510083 |
| ENSGALG00010022829 | 0.80696137  | 0.284452361 |
| ENSGALG00010022830 | 0.855123196 | 0.137419664 |
| ENSGALG00010022831 | 0.447114012 | 0.116515789 |
| ENSGALG00010022832 | 0.559338046 | 0.125826849 |
| ENSGALG00010022833 | 0.113553107 | 0.333743478 |
| ENSGALG00010022834 | 0.114924896 | 0.173020819 |
| ENSGALG00010022836 | 0.530101512 | 0.168787218 |
| ENSGALG00010022837 | 0.911330112 | 0.426700042 |
| ENSGALG00010022838 | 0.955616647 | 0.29499065  |
| ENSGALG00010022839 | 0.891825767 | 0.28961038  |
| ENSGALG00010022840 | 0.165085328 | 0.579650452 |
| ENSGALG00010022841 | 0.100267692 | 0.330310359 |
| ENSGALG00010022842 | 0.83125309  | 0.187033182 |
| ENSGALG00010022843 | 0.110041974 | 0.123910509 |
| ENSGALG00010022844 | 0.027851816 | 0.14441112  |
| ENSGALG00010022845 | 0.743369985 | 0.289091656 |
| ENSGALG00010022846 | 0.000893823 | 0.500599188 |

|                    |             |             |
|--------------------|-------------|-------------|
| ENSGALG00010022847 | 0.663039987 | 0.223659035 |
| ENSGALG00010022848 | 0.216433634 | 0.680598293 |
| ENSGALG00010022849 | 0.315941415 | 0.593915018 |
| ENSGALG00010022850 | 0.592895454 | 0.053303305 |
| ENSGALG00010022851 | 0.42868344  | 0.64194763  |
| ENSGALG00010022852 | 0.764314347 | 0.293375178 |
| ENSGALG00010022853 | 0.774460409 | 0.059717664 |
| ENSGALG00010022856 | 0.464117993 | 0.328429109 |
| ENSGALG00010022857 | 0.251531739 | 0.178153052 |
| ENSGALG00010022858 | 0.744049284 | 0.312095508 |
| ENSGALG00010022860 | 0.972281984 | 0.240731634 |
| ENSGALG00010022861 | 0.730999346 | 0.226024257 |
| ENSGALG00010022862 | 0.925255021 | 0.350869714 |
| ENSGALG00010022863 | 0.190288411 | 0.37006115  |
| ENSGALG00010022864 | 0.748459996 | 0.430924261 |
| ENSGALG00010022865 | 0.277566769 | 0.107857127 |
| ENSGALG00010022866 | 0.935529822 | 0.209548244 |
| ENSGALG00010022867 | 0.974513851 | 0.336288544 |
| ENSGALG00010022868 | 0.730590263 | 0.305336176 |
| ENSGALG00010022869 | 0.751879992 | 0.188296041 |
| ENSGALG00010022870 | 0.160411737 | 0.150137187 |
| ENSGALG00010022871 | 0.350206248 | 0.230703012 |
| ENSGALG00010022872 | 0.058419119 | 0.122260959 |
| ENSGALG00010022873 | 0.810948797 | 0.303597336 |
| ENSGALG00010022874 | 0.881269443 | 0.318546022 |
| ENSGALG00010022875 | 0.947553952 | 0.424016481 |
| ENSGALG00010022877 | 0.154564568 | 0.119876687 |
| ENSGALG00010022878 | 0.257495438 | 0.124672868 |
| ENSGALG00010022879 | 0.926731747 | 0.161910162 |
| ENSGALG00010022880 | 0.135694619 | 0.134705453 |
| ENSGALG00010022881 | 0.143789094 | 0.019347315 |
| ENSGALG00010022882 | 0.334090543 | 0.210043301 |
| ENSGALG00010022883 | 0.617318004 | 0.210325894 |
| ENSGALG00010022885 | 0.932822926 | 0.24641326  |
| ENSGALG00010022886 | 0.899961482 | 0.275625496 |
| ENSGALG00010022888 | 0.935099918 | 0.233379152 |
| ENSGALG00010022890 | 0.984181301 | 0.322003482 |
| ENSGALG00010022891 | 0.888227727 | 0.067410087 |
| ENSGALG00010022892 | 0.265558089 | 0.028821141 |
| ENSGALG00010022894 | 0.847284895 | 0.280944133 |
| ENSGALG00010022895 | 0.681910899 | 0.424666953 |
| ENSGALG00010022897 | 0.973111006 | 0.28087243  |
| ENSGALG00010022899 | 0.685410856 | 0.385360621 |
| ENSGALG00010022900 | 0.17234983  | 0.329145981 |
| ENSGALG00010022903 | 0.382985366 | 0.1291087   |
| ENSGALG00010022904 | 0.405745866 | 0.078539969 |
| ENSGALG00010022905 | 0.242059507 | 0.208144847 |
| ENSGALG00010022906 | 0.021553974 | 0.325011588 |
| ENSGALG00010022907 | 0.516521745 | 0.209332593 |
| ENSGALG00010022909 | 0.078939733 | 0.184522641 |
| ENSGALG00010022911 | 0.852385123 | 0.038248204 |
| ENSGALG00010022913 | 0.488195452 | 0.180499421 |
| ENSGALG00010022914 | 0.962100015 | 0.380000246 |
| ENSGALG00010022915 | 0.426196336 | 0.036601532 |
| ENSGALG00010022917 | 0.987950128 | 0.296360984 |
| ENSGALG00010022919 | 0.991093651 | 0.299915668 |

|                    |             |             |
|--------------------|-------------|-------------|
| ENSGALG00010022920 | 0.014123847 | 0.097825401 |
| ENSGALG00010022921 | 0.831083949 | 0.10267063  |
| ENSGALG00010022922 | 0.405959509 | 0.278890396 |
| ENSGALG00010022923 | 0.930099222 | 0.271197437 |
| ENSGALG00010022924 | 0.02551123  | 0.177368566 |
| ENSGALG00010022925 | 0.873692103 | 0.173407118 |
| ENSGALG00010022926 | 0.264090193 | 0.140913682 |
| ENSGALG00010022927 | 0.243173907 | 0.148349226 |
| ENSGALG00010022928 | 0.403172961 | 0.028071491 |
| ENSGALG00010022929 | 0.97882537  | 0.317442408 |
| ENSGALG00010022930 | 0.868588812 | 0.414728686 |
| ENSGALG00010022931 | 0.948250378 | 0.31983632  |
| ENSGALG00010022932 | 0.847878553 | 0.267137625 |
| ENSGALG00010022933 | 0.884402805 | 0.285939783 |
| ENSGALG00010022934 | 0.382090837 | 0.062273071 |
| ENSGALG00010022935 | 0.000893823 | 0.500599188 |
| ENSGALG00010022937 | 0.981202009 | 0.302939197 |
| ENSGALG00010022942 | 0.574276377 | 0.105585458 |
| ENSGALG00010022943 | 0.882376361 | 0.311077058 |
| ENSGALG00010022944 | 0.558258517 | 0.357680795 |
| ENSGALG00010022946 | 0.069304212 | 0.158640267 |
| ENSGALG00010022947 | 0.982017121 | 0.329204422 |
| ENSGALG00010022948 | 0.954126398 | 0.192076646 |
| ENSGALG00010022949 | 0.031090316 | 0.095543765 |
| ENSGALG00010022950 | 0.992030283 | 0.339091229 |
| ENSGALG00010022952 | 0.672739593 | 0.269276637 |
| ENSGALG00010022954 | 0.828293852 | 0.365059301 |
| ENSGALG00010022955 | 0.765961329 | 0.317310492 |
| ENSGALG00010022956 | 0.924579462 | 0.256338846 |
| ENSGALG00010022957 | 0.943485911 | 0.313111627 |
| ENSGALG00010022958 | 0.708032723 | 0.354052075 |
| ENSGALG00010022959 | 0.7361941   | 0.309912784 |
| ENSGALG00010022960 | 0.267156317 | 0.118341176 |
| ENSGALG00010022962 | 0.104359641 | 0.043511391 |
| ENSGALG00010022963 | 0.502604739 | 0.366088542 |
| ENSGALG00010022965 | 0.511694189 | 0.096925921 |
| ENSGALG00010022966 | 0.760144912 | 0.352672876 |
| ENSGALG00010022967 | 0.250346325 | 0.370439644 |
| ENSGALG00010022968 | 0.934016877 | 0.420441106 |
| ENSGALG00010022969 | 0.989412225 | 0.308928575 |
| ENSGALG00010022970 | 0.853159157 | 0.250525971 |
| ENSGALG00010022971 | 0.063182317 | 0.050201258 |
| ENSGALG00010022972 | 0.99703904  | 0.335616701 |
| ENSGALG00010022973 | 0.035949723 | 0.15676341  |
| ENSGALG00010022974 | 0.987546712 | 0.3052732   |
| ENSGALG00010022975 | 0.048720881 | 0.155114111 |
| ENSGALG00010022976 | 0.947612716 | 0.304085931 |
| ENSGALG00010022977 | 0.209217166 | 0.130147632 |
| ENSGALG00010022978 | 0.88697272  | 0.163534452 |
| ENSGALG00010022979 | 0.867925563 | 0.201341501 |
| ENSGALG00010022980 | 0.379115405 | 0.206626367 |
| ENSGALG00010022981 | 0.236262014 | 0.187731371 |
| ENSGALG00010022982 | 0.633768134 | 0.056091135 |
| ENSGALG00010022983 | 0.970297989 | 0.307004468 |
| ENSGALG00010022985 | 0.803751455 | 0.29307783  |
| ENSGALG00010022986 | 0.963674466 | 0.339912103 |



|                    |             |             |
|--------------------|-------------|-------------|
| ENSGALG00010022987 | 0.996134126 | 0.35229465  |
| ENSGALG00010022988 | 0.38715636  | 0.027422718 |
| ENSGALG00010022989 | 0.586396573 | 0.313192369 |
| ENSGALG00010022990 | 0.969272341 | 0.241942227 |
| ENSGALG00010022991 | 0.679817527 | 0.283143945 |
| ENSGALG00010022992 | 0.284804707 | 0.501661021 |
| ENSGALG00010022994 | 0.966009855 | 0.285004772 |
| ENSGALG00010022996 | 0.399453749 | 0.144668892 |
| ENSGALG00010022997 | 0.771145419 | 0.112969534 |
| ENSGALG00010022998 | 0.234092969 | 0.282062645 |
| ENSGALG00010022999 | 0.633562388 | 0.260183361 |
| ENSGALG00010023001 | 0.505520628 | 0.130024147 |
| ENSGALG00010023002 | 0.983233595 | 0.298554463 |
| ENSGALG00010023003 | 0.993786397 | 0.288774995 |
| ENSGALG00010023004 | 0.830758813 | 0.129363179 |
| ENSGALG00010023005 | 0.886537082 | 0.286554215 |
| ENSGALG00010023006 | 0.501894671 | 0.375631667 |
| ENSGALG00010023007 | 0.967845184 | 0.265468457 |
| ENSGALG00010023008 | 0.973050334 | 0.332877116 |
| ENSGALG00010023009 | 0.377293369 | 0.176429511 |
| ENSGALG00010023010 | 0.897173838 | 0.368577219 |
| ENSGALG00010023012 | 0.43516155  | 0.399347951 |
| ENSGALG00010023013 | 0.97075444  | 0.367906333 |
| ENSGALG00010023015 | 0.929961436 | 0.160674247 |
| ENSGALG00010023016 | 0.567608652 | 0.180888036 |
| ENSGALG00010023017 | 0.460764147 | 0.054732163 |
| ENSGALG00010023019 | 0.317212487 | 0.04984452  |
| ENSGALG00010023020 | 0.669646223 | 0.224942513 |
| ENSGALG00010023022 | 0.6448968   | 0.220997327 |
| ENSGALG00010023023 | 0.324712176 | 0.287838644 |
| ENSGALG00010023024 | 0.705222179 | 0.074460881 |
| ENSGALG00010023026 | 0.853450812 | 0.13353964  |
| ENSGALG00010023028 | 0.587484876 | 0.33160754  |
| ENSGALG00010023029 | 0.313161496 | 0.127746808 |
| ENSGALG00010023030 | 0.510149741 | 0.380141913 |
| ENSGALG00010023031 | 0.262922434 | 0.138601464 |
| ENSGALG00010023032 | 0.050690267 | 0.14779477  |
| ENSGALG00010023034 | 0.410231722 | 0.16984461  |
| ENSGALG00010023037 | 0.384486165 | 0.786883991 |
| ENSGALG00010023038 | 0.870419483 | 0.215462499 |
| ENSGALG00010023039 | 0.765815699 | 0.272385841 |
| ENSGALG00010023040 | 0.359142284 | 0.158091928 |
| ENSGALG00010023041 | 0.875547378 | 0.367714153 |
| ENSGALG00010023042 | 0.990465658 | 0.340939992 |
| ENSGALG00010023043 | 0.546015045 | 0.161432397 |
| ENSGALG00010023044 | 0.382985366 | 0.1291087   |
| ENSGALG00010023045 | 0.097545881 | 0.09040332  |
| ENSGALG00010023046 | 0.754224612 | 0.323903647 |
| ENSGALG00010023047 | 0.445698713 | 0.048953051 |
| ENSGALG00010023048 | 0.478461742 | 0.12713415  |
| ENSGALG00010023049 | 0.405797923 | 0.13200104  |
| ENSGALG00010023050 | 0.100021722 | 0.090739801 |
| ENSGALG00010023051 | 0.016069541 | 0.511799972 |
| ENSGALG00010023052 | 0.121652119 | 0.058852463 |
| ENSGALG00010023053 | 0.91881428  | 0.318916476 |
| ENSGALG00010023054 | 0.987840739 | 0.31215146  |

|                    |             |             |
|--------------------|-------------|-------------|
| ENSGALG00010023055 | 0.689910534 | 0.193084995 |
| ENSGALG00010023056 | 0.490183712 | 0.206853373 |
| ENSGALG00010023057 | 0.927168375 | 0.26912026  |
| ENSGALG00010023058 | 0.988042283 | 0.323504304 |
| ENSGALG00010023059 | 0.915594048 | 0.327479951 |
| ENSGALG00010023060 | 0.856014186 | 0.475589367 |
| ENSGALG00010023061 | 0.457999501 | 0.151970763 |
| ENSGALG00010023062 | 0.953454159 | 0.270501146 |
| ENSGALG00010023063 | 0.864760862 | 0.328963826 |
| ENSGALG00010023064 | 0.936750943 | 0.307343978 |
| ENSGALG00010023065 | 0.571875688 | 0.277003544 |
| ENSGALG00010023066 | 0.143712685 | 0.023649583 |
| ENSGALG00010023067 | 0.869499105 | 0.180292377 |
| ENSGALG00010023068 | 0.982631978 | 0.33436178  |
| ENSGALG00010023069 | 0.844617201 | 0.559195369 |
| ENSGALG00010023070 | 0.728562824 | 0.309577796 |
| ENSGALG00010023071 | 0.97095833  | 0.283293287 |
| ENSGALG00010023072 | 0.325016977 | 0.371468092 |
| ENSGALG00010023073 | 0.938730167 | 0.406041841 |
| ENSGALG00010023074 | 0.910014732 | 0.313242586 |
| ENSGALG00010023075 | 0.905019372 | 0.224045547 |
| ENSGALG00010023076 | 0.984310336 | 0.31996951  |
| ENSGALG00010023077 | 0.648667983 | 0.149012522 |
| ENSGALG00010023078 | 0.420176502 | 0.494228039 |
| ENSGALG00010023079 | 0.912856018 | 0.25380346  |
| ENSGALG00010023080 | 0.973826535 | 0.332760503 |
| ENSGALG00010023081 | 0.182515023 | 0.10074783  |
| ENSGALG00010023082 | 0.376189922 | 0.190265999 |
| ENSGALG00010023083 | 0.735507098 | 0.273731394 |
| ENSGALG00010023084 | 0.859231817 | 0.461898195 |
| ENSGALG00010023085 | 0.647827407 | 0.262257697 |
| ENSGALG00010023086 | 0.887662227 | 0.340877255 |
| ENSGALG00010023087 | 0.976422655 | 0.264281325 |
| ENSGALG00010023088 | 0.481124533 | 0.17287833  |
| ENSGALG00010023089 | 0.640642962 | 0.31407038  |
| ENSGALG00010023090 | 0.750014327 | 0.332852595 |
| ENSGALG00010023091 | 0.345434828 | 0.004027976 |
| ENSGALG00010023092 | 0.400215036 | 0.132215663 |
| ENSGALG00010023093 | 0.968104858 | 0.306850843 |
| ENSGALG00010023094 | 0.101237755 | 0.297312526 |
| ENSGALG00010023096 | 0.743571613 | 0.25946076  |
| ENSGALG00010023097 | 0.503970897 | 0.18304166  |
| ENSGALG00010023098 | 0.067501704 | 0.182705483 |
| ENSGALG00010023099 | 0.997306623 | 0.334927788 |
| ENSGALG00010023100 | 0.070188579 | 0.042362924 |
| ENSGALG00010023101 | 0.724296372 | 0.258894544 |
| ENSGALG00010023102 | 0.972596569 | 0.279247755 |
| ENSGALG00010023103 | 0.942878933 | 0.187695449 |
| ENSGALG00010023104 | 0.790036305 | 0.094641306 |
| ENSGALG00010023105 | 0.281014372 | 0.081680553 |
| ENSGALG00010023107 | 0.975032331 | 0.340926706 |
| ENSGALG00010023108 | 0.404363207 | 0.188164135 |
| ENSGALG00010023110 | 0.887274242 | 0.210149726 |
| ENSGALG00010023111 | 0.499911959 | 0.176896944 |
| ENSGALG00010023112 | 0.904819865 | 0.293584671 |
| ENSGALG00010023113 | 0.22764221  | 0.205349295 |

|                    |             |             |
|--------------------|-------------|-------------|
| ENSGALG00010023114 | 0.734144595 | 0.34143054  |
| ENSGALG00010023115 | 0.891870013 | 0.345999682 |
| ENSGALG00010023116 | 0.987485876 | 0.272617888 |
| ENSGALG00010023117 | 0.1351616   | 0.103731814 |
| ENSGALG00010023118 | 0.933735121 | 0.294945134 |
| ENSGALG00010023119 | 0.90352572  | 0.369280573 |
| ENSGALG00010023120 | 0.737857447 | 0.049197863 |
| ENSGALG00010023121 | 0.337471791 | 0.167003685 |
| ENSGALG00010023122 | 0.938504964 | 0.497781085 |
| ENSGALG00010023123 | 0.247758405 | 0.052279419 |
| ENSGALG00010023124 | 0.845730195 | 0.320514826 |
| ENSGALG00010023125 | 0.941967731 | 0.34752609  |
| ENSGALG00010023126 | 0.991145379 | 0.361082603 |
| ENSGALG00010023127 | 0.981882179 | 0.355662071 |
| ENSGALG00010023128 | 0.954189568 | 0.219834361 |
| ENSGALG00010023129 | 0.461237041 | 0.033132576 |
| ENSGALG00010023130 | 0.432481777 | 0.121195283 |
| ENSGALG00010023131 | 0.856023231 | 0.306472843 |
| ENSGALG00010023133 | 0.821395863 | 0.233859945 |
| ENSGALG00010023134 | 0.809221598 | 0.325325958 |
| ENSGALG00010023135 | 0.637602955 | 0.078026723 |
| ENSGALG00010023136 | 0.802851709 | 0.01402681  |
| ENSGALG00010023137 | 0.709929539 | 0.300460954 |
| ENSGALG00010023138 | 0.188353248 | 0.077257433 |
| ENSGALG00010023140 | 0.229243984 | 0.5702469   |
| ENSGALG00010023141 | 0.382985366 | 0.1291087   |
| ENSGALG00010023142 | 0.951747326 | 0.197273623 |
| ENSGALG00010023144 | 0.547638737 | 0.182346164 |
| ENSGALG00010023146 | 0.487320017 | 0.195958317 |
| ENSGALG00010023147 | 0.798463103 | 0.453316051 |
| ENSGALG00010023149 | 0.861249531 | 0.379799006 |
| ENSGALG00010023150 | 0.019460217 | 0.206595923 |
| ENSGALG00010023151 | 0.984059808 | 0.261839823 |
| ENSGALG00010023154 | 0.618748885 | 0.005036442 |
| ENSGALG00010023155 | 0.164440723 | 0.366930101 |
| ENSGALG00010023156 | 0.155440085 | 0.150790236 |
| ENSGALG00010023157 | 0.136095582 | 0.231793088 |
| ENSGALG00010023158 | 0.81789983  | 0.206514346 |
| ENSGALG00010023159 | 0.526964233 | 0.030367953 |
| ENSGALG00010023160 | 0.810587064 | 0.302729346 |
| ENSGALG00010023161 | 0.970628196 | 0.235760197 |
| ENSGALG00010023162 | 0.956471549 | 0.406270413 |
| ENSGALG00010023163 | 0.922433937 | 0.400235816 |
| ENSGALG00010023164 | 0.875354177 | 0.396950457 |
| ENSGALG00010023165 | 0.385170559 | 0.033926908 |
| ENSGALG00010023166 | 0.838076062 | 0.317041864 |
| ENSGALG00010023167 | 0.983170926 | 0.335146733 |
| ENSGALG00010023168 | 0.403148405 | 0.16396482  |
| ENSGALG00010023169 | 0.752564641 | 0.323515551 |
| ENSGALG00010023170 | 0.903845767 | 0.298005607 |
| ENSGALG00010023171 | 0.48525293  | 0.171682166 |
| ENSGALG00010023172 | 0.868076048 | 0.307331094 |
| ENSGALG00010023173 | 0.386254376 | 0.161451439 |
| ENSGALG00010023174 | 0.611692077 | 0.641461025 |
| ENSGALG00010023175 | 0.867796282 | 0.233911309 |
| ENSGALG00010023176 | 0.262922434 | 0.138601464 |

|                    |             |             |
|--------------------|-------------|-------------|
| ENSGALG00010023177 | 0.987590751 | 0.318256909 |
| ENSGALG00010023178 | 0.821085842 | 0.139276228 |
| ENSGALG00010023179 | 0.253828841 | 0.024839892 |
| ENSGALG00010023180 | 0.985164291 | 0.332848518 |
| ENSGALG00010023181 | 0.939785969 | 0.21050929  |
| ENSGALG00010023182 | 0.032259654 | 0.215395319 |
| ENSGALG00010023183 | 0.309052815 | 0.071829493 |
| ENSGALG00010023184 | 0.809971929 | 0.176062324 |
| ENSGALG00010023185 | 0.98267692  | 0.307640967 |
| ENSGALG00010023186 | 0.487041991 | 0.56453703  |
| ENSGALG00010023187 | 0.981841718 | 0.308280349 |
| ENSGALG00010023188 | 0.985239247 | 0.313356405 |
| ENSGALG00010023189 | 0.906490101 | 0.431082113 |
| ENSGALG00010023190 | 0.794795489 | 0.152341454 |
| ENSGALG00010023192 | 0.917916327 | 0.326635439 |
| ENSGALG00010023193 | 0.471658102 | 0.162683497 |
| ENSGALG00010023194 | 0.933957659 | 0.403174609 |
| ENSGALG00010023195 | 0.881788452 | 0.200261972 |
| ENSGALG00010023196 | 0.92172164  | 0.338105214 |
| ENSGALG00010023197 | 0.296272339 | 0.491563762 |
| ENSGALG00010023198 | 0.03368789  | 0.250671139 |
| ENSGALG00010023199 | 0.763272431 | 0.264760019 |
| ENSGALG00010023200 | 0.909276694 | 0.231550806 |
| ENSGALG00010023201 | 0.822583947 | 0.445606513 |
| ENSGALG00010023202 | 0.673536865 | 0.21137413  |
| ENSGALG00010023203 | 0.741929936 | 0.313784533 |
| ENSGALG00010023204 | 0.847603135 | 0.259536577 |
| ENSGALG00010023205 | 0.936966987 | 0.43663659  |
| ENSGALG00010023206 | 0.973464527 | 0.290724622 |
| ENSGALG00010023207 | 0.118088859 | 0.104285473 |
| ENSGALG00010023208 | 0.733905471 | 0.016255872 |
| ENSGALG00010023209 | 0.922665036 | 0.296487336 |
| ENSGALG00010023210 | 0.062094683 | 0.462362884 |
| ENSGALG00010023211 | 0.782709407 | 0.321603283 |
| ENSGALG00010023212 | 0.809468578 | 0.212410309 |
| ENSGALG00010023213 | 0.42628256  | 0.091407402 |
| ENSGALG00010023214 | 0.699105174 | 0.150613073 |
| ENSGALG00010023215 | 0.788728557 | 0.140847318 |
| ENSGALG00010023216 | 0.649228365 | 0.356810619 |
| ENSGALG00010023217 | 0.815623434 | 0.300234746 |
| ENSGALG00010023218 | 0.488837505 | 0.083304764 |
| ENSGALG00010023219 | 0.543451949 | 0.189310854 |
| ENSGALG00010023220 | 0.959980385 | 0.352121144 |
| ENSGALG00010023221 | 0.011728427 | 0.130036293 |
| ENSGALG00010023222 | 0.294226904 | 0.099361029 |
| ENSGALG00010023223 | 0.837330329 | 0.083032571 |
| ENSGALG00010023225 | 0.933496361 | 0.267250527 |
| ENSGALG00010023226 | 0.30962043  | 0.189081312 |
| ENSGALG00010023227 | 0.758545313 | 0.266281797 |
| ENSGALG00010023228 | 0.987471546 | 0.347384235 |
| ENSGALG00010023229 | 0.791196219 | 0.403638833 |
| ENSGALG00010023230 | 0.984006485 | 0.290870829 |
| ENSGALG00010023231 | 0.109965949 | 0.024893637 |
| ENSGALG00010023233 | 0.338700547 | 0.042090119 |
| ENSGALG00010023234 | 0.332337017 | 0.163881835 |
| ENSGALG00010023235 | 0.491517784 | 0.008894752 |

|                    |             |             |
|--------------------|-------------|-------------|
| ENSGALG00010023237 | 0.229147801 | 0.161026159 |
| ENSGALG00010023238 | 0.933511161 | 0.280251497 |
| ENSGALG00010023239 | 0.859594947 | 0.305921088 |
| ENSGALG00010023240 | 0.59055418  | 0.399522111 |
| ENSGALG00010023243 | 0.994905249 | 0.320985601 |
| ENSGALG00010023244 | 0.874804104 | 0.211854548 |
| ENSGALG00010023245 | 0.82799123  | 0.338838473 |
| ENSGALG00010023246 | 0.483944261 | 0.636547299 |
| ENSGALG00010023247 | 0.322549733 | 0.226920139 |
| ENSGALG00010023248 | 0.568863479 | 0.294182265 |
| ENSGALG00010023249 | 0.716575912 | 0.059566683 |
| ENSGALG00010023250 | 0.448343057 | 0.088243838 |
| ENSGALG00010023251 | 0.934711206 | 0.268525987 |
| ENSGALG00010023252 | 0.909929695 | 0.209293983 |
| ENSGALG00010023253 | 0.519811601 | 0.19993089  |
| ENSGALG00010023254 | 0.308445237 | 0.068934387 |
| ENSGALG00010023255 | 0.95258963  | 0.376144864 |
| ENSGALG00010023257 | 0.226482362 | 0.246608449 |
| ENSGALG00010023258 | 0.02160797  | 0.114437157 |
| ENSGALG00010023259 | 0.955540337 | 0.30694989  |
| ENSGALG00010023260 | 0.058139656 | 0.005230107 |
| ENSGALG00010023261 | 0.8929486   | 0.238507142 |
| ENSGALG00010023262 | 0.875994928 | 0.275375397 |
| ENSGALG00010023263 | 0.891196596 | 0.468198339 |
| ENSGALG00010023264 | 0.436204244 | 0.010604866 |
| ENSGALG00010023265 | 0.848666304 | 0.154117116 |
| ENSGALG00010023266 | 0.599714871 | 0.293889639 |
| ENSGALG00010023267 | 0.307328828 | 0.270960138 |
| ENSGALG00010023268 | 0.989616943 | 0.325949437 |
| ENSGALG00010023269 | 0.572361302 | 0.11410364  |
| ENSGALG00010023270 | 0.739920173 | 0.460725995 |
| ENSGALG00010023271 | 0.763942469 | 0.357634107 |
| ENSGALG00010023272 | 0.816253193 | 0.311188694 |
| ENSGALG00010023273 | 0.944031088 | 0.293436827 |
| ENSGALG00010023274 | 0.794534486 | 0.261127968 |
| ENSGALG00010023276 | 0.831254586 | 0.230977515 |
| ENSGALG00010023277 | 0.627419073 | 0.383779683 |
| ENSGALG00010023278 | 0.351196515 | 0.083424408 |
| ENSGALG00010023279 | 0.975097706 | 0.320298153 |
| ENSGALG00010023280 | 0.147559824 | 0.053397793 |
| ENSGALG00010023281 | 0.608421081 | 0.490316239 |
| ENSGALG00010023282 | 0.912569474 | 0.327142053 |
| ENSGALG00010023283 | 0.508622295 | 0.266078524 |
| ENSGALG00010023284 | 0.839781419 | 0.406309304 |
| ENSGALG00010023285 | 0.953976319 | 0.316211098 |
| ENSGALG00010023286 | 0.552977899 | 0.062822788 |
| ENSGALG00010023287 | 0.819222182 | 0.341572257 |
| ENSGALG00010023288 | 0.902921127 | 0.2524466   |
| ENSGALG00010023289 | 0.300972266 | 0.114787999 |
| ENSGALG00010023290 | 0.048815315 | 0.369445105 |
| ENSGALG00010023291 | 0.848463669 | 0.184702106 |
| ENSGALG00010023292 | 0.456865547 | 0.27132674  |
| ENSGALG00010023293 | 0.123854023 | 0.012507325 |
| ENSGALG00010023294 | 0.285272007 | 0.109169955 |
| ENSGALG00010023295 | 0.441798016 | 0.818179307 |
| ENSGALG00010023296 | 0.651984719 | 0.125581153 |

|                    |             |             |
|--------------------|-------------|-------------|
| ENSGALG00010023297 | 0.501684793 | 0.152725632 |
| ENSGALG00010023298 | 0.00291881  | 0.189464508 |
| ENSGALG00010023299 | 0.483145695 | 0.089065759 |
| ENSGALG00010023302 | 0.757125527 | 0.055425501 |
| ENSGALG00010023304 | 0.601921454 | 0.050374347 |
| ENSGALG00010023305 | 0.909231715 | 0.230531608 |
| ENSGALG00010023307 | 0.470122212 | 0.141233929 |
| ENSGALG00010023309 | 0.308967521 | 0.10461628  |
| ENSGALG00010023311 | 0.870611655 | 0.141893694 |
| ENSGALG00010023312 | 0.986040795 | 0.295726849 |
| ENSGALG00010023314 | 0.837330459 | 0.299852571 |
| ENSGALG00010023315 | 0.733010074 | 0.109306149 |
| ENSGALG00010023316 | 0.256828349 | 0.119064955 |
| ENSGALG00010023317 | 0.825224335 | 0.352312509 |
| ENSGALG00010023319 | 0.89939368  | 0.392122281 |
| ENSGALG00010023320 | 0.961038511 | 0.33979238  |
| ENSGALG00010023322 | 0.094352618 | 0.242242076 |
| ENSGALG00010023324 | 0.892911824 | 0.296198255 |
| ENSGALG00010023325 | 0.376808449 | 0.786806161 |
| ENSGALG00010023326 | 0.310945388 | 0.732980472 |
| ENSGALG00010023327 | 0.190585904 | 0.011950567 |
| ENSGALG00010023328 | 0.821232634 | 0.234675989 |
| ENSGALG00010023329 | 0.876462347 | 0.316931848 |
| ENSGALG00010023330 | 0.986803757 | 0.332718071 |
| ENSGALG00010023331 | 0.856009647 | 0.050708652 |
| ENSGALG00010023332 | 0.988648206 | 0.341557207 |
| ENSGALG00010023333 | 0.413850864 | 0.68252835  |
| ENSGALG00010023334 | 0.875225721 | 0.288598389 |
| ENSGALG00010023335 | 0.012811482 | 0.078178341 |
| ENSGALG00010023336 | 0.247660946 | 0.300978107 |
| ENSGALG00010023337 | 0.932281696 | 0.198096842 |
| ENSGALG00010023338 | 0.124705648 | 0.149092768 |
| ENSGALG00010023339 | 0.450637699 | 0.70414841  |
| ENSGALG00010023340 | 0.860269702 | 0.09439476  |
| ENSGALG00010023341 | 0.177454464 | 0.008894243 |
| ENSGALG00010023342 | 0.067802737 | 0.115040004 |
| ENSGALG00010023343 | 0.993398513 | 0.285154482 |
| ENSGALG00010023344 | 0.105327499 | 0.095352743 |
| ENSGALG00010023345 | 0.184202368 | 0.190569538 |
| ENSGALG00010023346 | 0.584277259 | 0.19960296  |
| ENSGALG00010023347 | 0.984520238 | 0.298486715 |
| ENSGALG00010023349 | 0.507366828 | 0.176993171 |
| ENSGALG00010023350 | 0.994924892 | 0.357401436 |
| ENSGALG00010023351 | 0.79040185  | 0.128181724 |
| ENSGALG00010023352 | 0.059891944 | 0.301840631 |
| ENSGALG00010023353 | 0.649777823 | 0.21868166  |
| ENSGALG00010023354 | 0.973834725 | 0.287997084 |
| ENSGALG00010023355 | 0.71541942  | 0.571922382 |
| ENSGALG00010023356 | 0.756305648 | 0.474033545 |
| ENSGALG00010023359 | 0.129917853 | 0.363354375 |
| ENSGALG00010023362 | 0.986857638 | 0.347203668 |
| ENSGALG00010023363 | 0.206973096 | 0.396378723 |
| ENSGALG00010023364 | 0.049695279 | 0.1582619   |
| ENSGALG00010023365 | 0.845322321 | 0.268748751 |
| ENSGALG00010023366 | 0.535861882 | 0.165813128 |
| ENSGALG00010023368 | 0.476378483 | 0.249613167 |

|                    |             |             |
|--------------------|-------------|-------------|
| ENSGALG00010023369 | 0.974868042 | 0.344720888 |
| ENSGALG00010023371 | 0.203991683 | 0.058221925 |
| ENSGALG00010023372 | 0.50200739  | 0.086492125 |
| ENSGALG00010023373 | 0.304953602 | 0.087447627 |
| ENSGALG00010023374 | 0.735621418 | 0.35289718  |
| ENSGALG00010023375 | 0.954811062 | 0.367437089 |
| ENSGALG00010023376 | 0.223634466 | 0.38097584  |
| ENSGALG00010023377 | 0.96848228  | 0.359911688 |
| ENSGALG00010023378 | 0.977985172 | 0.315310005 |
| ENSGALG00010023379 | 0.248483015 | 0.473183049 |
| ENSGALG00010023380 | 0.905680636 | 0.38380976  |
| ENSGALG00010023381 | 0.964899    | 0.320232832 |
| ENSGALG00010023382 | 0.167358607 | 0.152036058 |
| ENSGALG00010023383 | 0.982805596 | 0.370694022 |
| ENSGALG00010023384 | 0.60101134  | 0.275111357 |
| ENSGALG00010023385 | 0.095322175 | 0.101865217 |
| ENSGALG00010023387 | 0.98666365  | 0.326858079 |
| ENSGALG00010023388 | 0.929058431 | 0.316182109 |
| ENSGALG00010023389 | 0.423105544 | 0.342077982 |
| ENSGALG00010023390 | 0.987605174 | 0.306448455 |
| ENSGALG00010023391 | 0.846963964 | 0.182492671 |
| ENSGALG00010023392 | 0.997917864 | 0.3310629   |
| ENSGALG00010023393 | 0.900660169 | 0.419366969 |
| ENSGALG00010023394 | 0.70614802  | 0.245833822 |
| ENSGALG00010023395 | 0.926739686 | 0.315925291 |
| ENSGALG00010023396 | 0.975492047 | 0.349719607 |
| ENSGALG00010023397 | 0.757180813 | 0.44577217  |
| ENSGALG00010023398 | 0.325642985 | 0.094857903 |
| ENSGALG00010023399 | 0.742534087 | 0.027328259 |
| ENSGALG00010023400 | 0.458680952 | 0.198997647 |
| ENSGALG00010023401 | 0.871551657 | 0.352570062 |
| ENSGALG00010023402 | 0.640788081 | 0.420152725 |
| ENSGALG00010023404 | 0.594599986 | 0.228949474 |
| ENSGALG00010023405 | 0.371953477 | 0.00858918  |
| ENSGALG00010023406 | 0.001647015 | 0.154950019 |
| ENSGALG00010023407 | 0.453540879 | 0.247014721 |
| ENSGALG00010023408 | 0.692827028 | 0.217863393 |
| ENSGALG00010023411 | 0.99059785  | 0.367231381 |
| ENSGALG00010023412 | 0.957039132 | 0.328944395 |
| ENSGALG00010023414 | 0.509219387 | 0.000331018 |
| ENSGALG00010023415 | 0.932614978 | 0.393338596 |
| ENSGALG00010023416 | 0.318813342 | 0.16516172  |
| ENSGALG00010023418 | 0.974862628 | 0.327506489 |
| ENSGALG00010023419 | 0.927391933 | 0.386690364 |
| ENSGALG00010023420 | 0.973414127 | 0.354678056 |
| ENSGALG00010023421 | 0.209686214 | 0.215611122 |
| ENSGALG00010023422 | 0.810874695 | 0.328305461 |
| ENSGALG00010023423 | 0.970649705 | 0.31142936  |
| ENSGALG00010023425 | 0.097780439 | 0.187912744 |
| ENSGALG00010023428 | 0.632822554 | 0.409454531 |
| ENSGALG00010023429 | 0.265877925 | 0.086118689 |
| ENSGALG00010023431 | 0.228755643 | 0.026989953 |
| ENSGALG00010023432 | 0.934461598 | 0.235882338 |
| ENSGALG00010023434 | 0.07749962  | 0.0183784   |
| ENSGALG00010023437 | 0.568571688 | 0.197862468 |
| ENSGALG00010023438 | 0.710221076 | 0.163777404 |

|                    |             |             |
|--------------------|-------------|-------------|
| ENSGALG00010023439 | 0.621515981 | 0.260693873 |
| ENSGALG00010023441 | 0.835989789 | 0.322006881 |
| ENSGALG00010023442 | 0.808343993 | 0.17719435  |
| ENSGALG00010023443 | 0.952903983 | 0.310164851 |
| ENSGALG00010023446 | 0.938125062 | 0.326131992 |
| ENSGALG00010023447 | 0.876092822 | 0.613655108 |
| ENSGALG00010023448 | 0.765357825 | 0.297039493 |
| ENSGALG00010023449 | 0.486399034 | 0.623919683 |
| ENSGALG00010023453 | 0.943728836 | 0.223203414 |
| ENSGALG00010023454 | 0.878673554 | 0.29278963  |
| ENSGALG00010023455 | 0.865104486 | 0.361193518 |
| ENSGALG00010023456 | 0.981011868 | 0.367353057 |
| ENSGALG00010023458 | 0.91456267  | 0.357124355 |
| ENSGALG00010023459 | 0.396033798 | 0.454055866 |
| ENSGALG00010023460 | 0.620498859 | 0.424563545 |
| ENSGALG00010023462 | 0.644539275 | 0.188882475 |
| ENSGALG00010023463 | 0.02436834  | 0.087960992 |
| ENSGALG00010023464 | 0.372022124 | 0.177125962 |
| ENSGALG00010023465 | 0.575823416 | 0.288840255 |
| ENSGALG00010023466 | 0.0668632   | 0.112335511 |
| ENSGALG00010023468 | 0.242943051 | 0.154260633 |
| ENSGALG00010023469 | 0.572495283 | 0.291977943 |
| ENSGALG00010023470 | 0.028230893 | 0.387372767 |
| ENSGALG00010023471 | 0.175020934 | 0.053743361 |
| ENSGALG00010023472 | 0.986644452 | 0.281788047 |
| ENSGALG00010023473 | 0.715617245 | 0.097711052 |
| ENSGALG00010023475 | 0.200703594 | 0.32543139  |
| ENSGALG00010023476 | 0.878862439 | 0.227432753 |
| ENSGALG00010023477 | 0.071547032 | 0.081090131 |
| ENSGALG00010023478 | 0.610117519 | 0.253443186 |
| ENSGALG00010023479 | 0.6847275   | 0.010730322 |
| ENSGALG00010023480 | 0.20888882  | 0.297887481 |
| ENSGALG00010023482 | 0.261935957 | 0.356883497 |
| ENSGALG00010023484 | 0.59338899  | 0.008488204 |
| ENSGALG00010023485 | 0.043795587 | 0.036855734 |
| ENSGALG00010023487 | 0.919179868 | 0.241361337 |
| ENSGALG00010023488 | 0.024374485 | 0.442743073 |
| ENSGALG00010023489 | 0.9731692   | 0.337152307 |
| ENSGALG00010023490 | 0.3945995   | 0.218335422 |
| ENSGALG00010023493 | 0.469322941 | 0.22948855  |
| ENSGALG00010023494 | 0.490989737 | 0.119927485 |
| ENSGALG00010023496 | 0.172527235 | 0.185827519 |
| ENSGALG00010023497 | 0.580986752 | 0.168589055 |
| ENSGALG00010023498 | 0.58690654  | 0.362556344 |
| ENSGALG00010023499 | 0.942843726 | 0.351744821 |
| ENSGALG00010023500 | 0.194449479 | 0.324733411 |
| ENSGALG00010023502 | 0.777443271 | 0.2930474   |
| ENSGALG00010023503 | 0.029037298 | 0.209055746 |
| ENSGALG00010023504 | 0.309774718 | 0.023936599 |
| ENSGALG00010023505 | 0.366057894 | 0.402915854 |
| ENSGALG00010023506 | 0.086843815 | 0.069053955 |
| ENSGALG00010023507 | 0.919001146 | 0.311213323 |
| ENSGALG00010023508 | 0.314030453 | 0.025377178 |
| ENSGALG00010023509 | 0.809459617 | 0.340956382 |
| ENSGALG00010023510 | 0.491978806 | 0.276805245 |
| ENSGALG00010023512 | 0.113557046 | 0.149841513 |



|                    |             |             |
|--------------------|-------------|-------------|
| ENSGALG00010023513 | 0.969423782 | 0.346570347 |
| ENSGALG00010023514 | 0.960538235 | 0.319817056 |
| ENSGALG00010023515 | 0.476506975 | 0.085873798 |
| ENSGALG00010023516 | 0.115840831 | 0.197904535 |
| ENSGALG00010023517 | 0.201733461 | 0.252939512 |
| ENSGALG00010023518 | 0.991466283 | 0.302739993 |
| ENSGALG00010023519 | 0.590180888 | 0.057800757 |
| ENSGALG00010023520 | 0.675622977 | 0.150020555 |
| ENSGALG00010023521 | 0.621254102 | 0.233086882 |
| ENSGALG00010023522 | 0.960535905 | 0.304838558 |
| ENSGALG00010023523 | 0.421878182 | 0.24960237  |
| ENSGALG00010023524 | 0.276986606 | 0.094261334 |
| ENSGALG00010023525 | 0.18987241  | 0.309037298 |
| ENSGALG00010023526 | 0.359014583 | 0.112997448 |
| ENSGALG00010023527 | 0.945280679 | 0.397662329 |
| ENSGALG00010023529 | 0.485646704 | 0.165312571 |
| ENSGALG00010023530 | 0.148707918 | 0.00266598  |
| ENSGALG00010023531 | 0.24623071  | 0.162379792 |
| ENSGALG00010023532 | 0.149097942 | 0.053318751 |
| ENSGALG00010023533 | 0.945010819 | 0.273941011 |
| ENSGALG00010023534 | 0.010574754 | 0.139589123 |
| ENSGALG00010023535 | 0.000893823 | 0.500599188 |
| ENSGALG00010023536 | 0.791535895 | 0.244454688 |
| ENSGALG00010023537 | 0.840407872 | 0.290516418 |
| ENSGALG00010023539 | 0.955031412 | 0.222988726 |
| ENSGALG00010023540 | 0.443892347 | 0.242324155 |
| ENSGALG00010023543 | 0.911343694 | 0.182436821 |
| ENSGALG00010023544 | 0.30012854  | 0.069535251 |
| ENSGALG00010023545 | 0.612433973 | 0.237018082 |
| ENSGALG00010023546 | 0.58172978  | 0.140153325 |
| ENSGALG00010023547 | 0.739597703 | 0.162953653 |
| ENSGALG00010023549 | 0.54305534  | 0.046263071 |
| ENSGALG00010023550 | 0.226384882 | 0.175738806 |
| ENSGALG00010023551 | 0.841323377 | 0.223496619 |
| ENSGALG00010023552 | 0.384280955 | 0.141063301 |
| ENSGALG00010023553 | 0.421071569 | 0.25896118  |
| ENSGALG00010023554 | 0.664166216 | 0.012474472 |
| ENSGALG00010023555 | 0.078740801 | 0.064527914 |
| ENSGALG00010023556 | 0.584205955 | 0.549042928 |
| ENSGALG00010023558 | 0.373310088 | 0.577638593 |
| ENSGALG00010023559 | 0.475455904 | 0.093583958 |
| ENSGALG00010023560 | 0.873363682 | 0.147462065 |
| ENSGALG00010023561 | 0.518863658 | 0.190313836 |
| ENSGALG00010023562 | 0.135086737 | 0.382847154 |
| ENSGALG00010023564 | 0.684758639 | 0.216524064 |
| ENSGALG00010023565 | 0.535175555 | 0.270437609 |
| ENSGALG00010023569 | 0.954180281 | 0.218690441 |
| ENSGALG00010023571 | 0.862946101 | 0.121573151 |
| ENSGALG00010023572 | 0.329974751 | 0.054497305 |
| ENSGALG00010023573 | 0.234683281 | 0.15335379  |
| ENSGALG00010023574 | 0.536637983 | 0.032250921 |
| ENSGALG00010023577 | 0.412003148 | 0.194027701 |
| ENSGALG00010023578 | 0.914217652 | 0.217264191 |
| ENSGALG00010023580 | 0.873803891 | 0.373138229 |
| ENSGALG00010023583 | 0.751114277 | 0.274212426 |
| ENSGALG00010023584 | 0.583651981 | 0.209341691 |

|                    |             |             |
|--------------------|-------------|-------------|
| ENSGALG00010023585 | 0.450627971 | 0.267869353 |
| ENSGALG00010023587 | 0.302237345 | 0.026759815 |
| ENSGALG00010023588 | 0.934310159 | 0.222992737 |
| ENSGALG00010023590 | 0.409716357 | 0.034904619 |
| ENSGALG00010023592 | 0.605833859 | 0.008404212 |
| ENSGALG00010023593 | 0.149840297 | 0.2335156   |
| ENSGALG00010023594 | 0.576881929 | 0.155694121 |
| ENSGALG00010023596 | 0.169555175 | 0.152663134 |
| ENSGALG00010023597 | 0.753421774 | 0.18017723  |
| ENSGALG00010023598 | 0.937515837 | 0.243831403 |
| ENSGALG00010023599 | 0.256828349 | 0.119064955 |
| ENSGALG00010023600 | 0.037122937 | 0.074267814 |
| ENSGALG00010023601 | 0.894964929 | 0.250385304 |
| ENSGALG00010023602 | 0.207422078 | 0.205899859 |
| ENSGALG00010023603 | 0.990290301 | 0.345629515 |
| ENSGALG00010023604 | 0.590640075 | 0.168898637 |
| ENSGALG00010023605 | 0.997386063 | 0.31528846  |
| ENSGALG00010023606 | 0.73916801  | 0.336752091 |
| ENSGALG00010023607 | 0.367038581 | 0.198100366 |
| ENSGALG00010023609 | 0.089560573 | 0.064827157 |
| ENSGALG00010023611 | 0.376335967 | 0.225830727 |
| ENSGALG00010023612 | 0.946014636 | 0.235500649 |
| ENSGALG00010023613 | 0.907732074 | 0.41118074  |
| ENSGALG00010023614 | 0.348032803 | 0.146426442 |
| ENSGALG00010023615 | 0.271701261 | 0.072417625 |
| ENSGALG00010023617 | 0.549003596 | 0.215398015 |
| ENSGALG00010023618 | 0.184928855 | 0.202237853 |
| ENSGALG00010023619 | 0.191411902 | 0.032149612 |
| ENSGALG00010023620 | 0.918840987 | 0.302623085 |
| ENSGALG00010023621 | 0.798684394 | 0.081410645 |
| ENSGALG00010023622 | 0.361055318 | 0.356743384 |
| ENSGALG00010023623 | 0.698377062 | 0.368053924 |
| ENSGALG00010023624 | 0.885518271 | 0.399533239 |
| ENSGALG00010023625 | 0.511186951 | 0.312227349 |
| ENSGALG00010023626 | 0.959941295 | 0.389307738 |
| ENSGALG00010023627 | 0.927180423 | 0.247840506 |
| ENSGALG00010023628 | 0.288786203 | 0.111633975 |
| ENSGALG00010023631 | 0.914728878 | 0.354267127 |
| ENSGALG00010023633 | 0.045917004 | 0.109214977 |
| ENSGALG00010023634 | 0.334983846 | 0.25736038  |
| ENSGALG00010023635 | 0.490332839 | 0.117047211 |
| ENSGALG00010023636 | 0.372644781 | 0.294065648 |
| ENSGALG00010023637 | 0.92763948  | 0.317022664 |
| ENSGALG00010023638 | 0.98838834  | 0.345951063 |
| ENSGALG00010023639 | 0.986461806 | 0.294630025 |
| ENSGALG00010023640 | 0.013611624 | 0.197553281 |
| ENSGALG00010023641 | 0.422567363 | 0.042733148 |
| ENSGALG00010023642 | 0.070044076 | 0.122805121 |
| ENSGALG00010023643 | 0.868419107 | 0.309923891 |
| ENSGALG00010023644 | 0.517881182 | 0.235040734 |
| ENSGALG00010023645 | 0.603632826 | 0.152678479 |
| ENSGALG00010023646 | 0.042747212 | 0.39423924  |
| ENSGALG00010023647 | 0.55507486  | 0.122186723 |
| ENSGALG00010023648 | 0.993400118 | 0.324833823 |
| ENSGALG00010023649 | 0.244608491 | 0.145774328 |
| ENSGALG00010023650 | 0.401639624 | 0.101384476 |

|                    |             |             |
|--------------------|-------------|-------------|
| ENSGALG00010023651 | 0.483083958 | 0.120980463 |
| ENSGALG00010023652 | 0.97501819  | 0.319422058 |
| ENSGALG00010023654 | 0.291591738 | 0.38361006  |
| ENSGALG00010023655 | 0.993093414 | 0.331036162 |
| ENSGALG00010023656 | 0.450630049 | 0.55940982  |
| ENSGALG00010023657 | 0.863111904 | 0.125885954 |
| ENSGALG00010023658 | 0.68170358  | 0.373282021 |
| ENSGALG00010023659 | 0.77294538  | 0.280926073 |
| ENSGALG00010023660 | 0.032804077 | 0.393326    |
| ENSGALG00010023663 | 0.898573549 | 0.221611186 |
| ENSGALG00010023664 | 0.427771098 | 0.103025857 |
| ENSGALG00010023665 | 0.847556785 | 0.219561161 |
| ENSGALG00010023666 | 0.939273532 | 0.259710111 |
| ENSGALG00010023667 | 0.660101963 | 0.18770249  |
| ENSGALG00010023668 | 0.198273719 | 0.289512717 |
| ENSGALG00010023670 | 0.710599603 | 0.202511978 |
| ENSGALG00010023671 | 0.831928338 | 0.147152015 |
| ENSGALG00010023673 | 0.992312555 | 0.341612817 |
| ENSGALG00010023675 | 0.38813597  | 0.156768404 |
| ENSGALG00010023676 | 0.916495629 | 0.28390264  |
| ENSGALG00010023677 | 0.992625157 | 0.309520772 |
| ENSGALG00010023679 | 0.85745941  | 0.362844732 |
| ENSGALG00010023680 | 0.91705622  | 0.33101852  |
| ENSGALG00010023681 | 0.800119699 | 0.286926624 |
| ENSGALG00010023682 | 0.827261739 | 0.44244777  |
| ENSGALG00010023683 | 0.766631351 | 0.289052456 |
| ENSGALG00010023684 | 0.396211517 | 0.126961164 |
| ENSGALG00010023685 | 0.122283444 | 0.198093229 |
| ENSGALG00010023686 | 0.818903619 | 0.428047486 |
| ENSGALG00010023687 | 0.075597773 | 0.114185715 |
| ENSGALG00010023689 | 0.264931047 | 0.003549441 |
| ENSGALG00010023690 | 0.564235723 | 0.202866004 |
| ENSGALG00010023691 | 0.404821901 | 0.251237489 |
| ENSGALG00010023692 | 0.125447572 | 0.005709717 |
| ENSGALG00010023693 | 0.69241226  | 0.383127088 |
| ENSGALG00010023694 | 0.758456323 | 0.255792577 |
| ENSGALG00010023695 | 0.951940891 | 0.291435345 |
| ENSGALG00010023696 | 0.853087182 | 0.39809182  |
| ENSGALG00010023698 | 0.336901568 | 0.194339256 |
| ENSGALG00010023699 | 0.957583496 | 0.331776029 |
| ENSGALG00010023701 | 0.777400118 | 0.211604183 |
| ENSGALG00010023702 | 0.378146111 | 0.183191241 |
| ENSGALG00010023703 | 0.934755027 | 0.428555295 |
| ENSGALG00010023704 | 0.789004443 | 0.117762019 |
| ENSGALG00010023705 | 0.815197892 | 0.392689248 |
| ENSGALG00010023706 | 0.036454286 | 0.043760178 |
| ENSGALG00010023707 | 0.856510256 | 0.110859853 |
| ENSGALG00010023708 | 0.665153208 | 0.066881722 |
| ENSGALG00010023709 | 0.589530675 | 0.088166891 |
| ENSGALG00010023710 | 0.896750011 | 0.19800571  |
| ENSGALG00010023711 | 0.77899328  | 0.119747038 |
| ENSGALG00010023712 | 0.462911791 | 0.282728495 |
| ENSGALG00010023713 | 0.902059608 | 0.289768787 |
| ENSGALG00010023714 | 0.519033498 | 0.227455988 |
| ENSGALG00010023715 | 0.963657082 | 0.234232436 |
| ENSGALG00010023716 | 0.528710171 | 0.344752015 |

|                    |             |             |
|--------------------|-------------|-------------|
| ENSGALG00010023717 | 0.753297307 | 0.296880195 |
| ENSGALG00010023719 | 0.317410796 | 0.133134556 |
| ENSGALG00010023720 | 0.776768424 | 0.042135757 |
| ENSGALG00010023721 | 0.283529993 | 0.098309861 |
| ENSGALG00010023722 | 0.975687522 | 0.290852889 |
| ENSGALG00010023724 | 0.063863594 | 0.306334881 |
| ENSGALG00010023725 | 0.475332411 | 0.009060829 |
| ENSGALG00010023726 | 0.896216365 | 0.148130782 |
| ENSGALG00010023727 | 0.572524857 | 0.313115277 |
| ENSGALG00010023728 | 0.454261635 | 0.381204938 |
| ENSGALG00010023730 | 0.945304776 | 0.3294732   |
| ENSGALG00010023731 | 0.287116597 | 0.083672352 |
| ENSGALG00010023732 | 0.633601232 | 0.287387743 |
| ENSGALG00010023733 | 0.885886526 | 0.462354939 |
| ENSGALG00010023734 | 0.012184093 | 0.540210871 |
| ENSGALG00010023736 | 0.788987846 | 0.121211317 |
| ENSGALG00010023738 | 0.792539665 | 0.082640567 |
| ENSGALG00010023739 | 0.837597559 | 0.315426837 |
| ENSGALG00010023740 | 0.839075181 | 0.292065838 |
| ENSGALG00010023741 | 0.469231849 | 0.226779169 |
| ENSGALG00010023742 | 0.017411055 | 0.13007104  |
| ENSGALG00010023743 | 0.939841907 | 0.291379468 |
| ENSGALG00010023744 | 0.882056739 | 0.233339269 |
| ENSGALG00010023745 | 0.887180978 | 0.305827029 |
| ENSGALG00010023746 | 0.798234353 | 0.214021128 |
| ENSGALG00010023747 | 0.658451612 | 0.185316664 |
| ENSGALG00010023748 | 0.918625427 | 0.274552824 |
| ENSGALG00010023749 | 0.076843932 | 0.181738623 |
| ENSGALG00010023750 | 0.263338982 | 0.010334164 |
| ENSGALG00010023751 | 0.810957661 | 0.368040313 |
| ENSGALG00010023752 | 0.284755755 | 0.069408504 |
| ENSGALG00010023754 | 0.208550923 | 0.676301294 |
| ENSGALG00010023756 | 0.47280763  | 0.151326378 |
| ENSGALG00010023757 | 0.428556337 | 0.149110462 |
| ENSGALG00010023758 | 0.962658833 | 0.299728401 |
| ENSGALG00010023759 | 0.968952678 | 0.368650293 |
| ENSGALG00010023760 | 0.044449593 | 0.078223158 |
| ENSGALG00010023762 | 0.995818444 | 0.317031331 |
| ENSGALG00010023764 | 0.846784687 | 0.293924258 |
| ENSGALG00010023765 | 0.964236876 | 0.273648625 |
| ENSGALG00010023766 | 0.294139098 | 0.154124277 |
| ENSGALG00010023767 | 0.971751606 | 0.323600228 |
| ENSGALG00010023770 | 0.291516086 | 0.043362024 |
| ENSGALG00010023773 | 0.763807712 | 0.177426579 |
| ENSGALG00010023774 | 0.580310529 | 0.1979157   |
| ENSGALG00010023775 | 0.903377693 | 0.269974786 |
| ENSGALG00010023776 | 0.978695107 | 0.300902774 |
| ENSGALG00010023777 | 0.935944575 | 0.265245801 |
| ENSGALG00010023778 | 0.61904602  | 0.347261136 |
| ENSGALG00010023781 | 0.219720361 | 0.040602198 |
| ENSGALG00010023782 | 0.083918784 | 0.055037538 |
| ENSGALG00010023783 | 0.939551829 | 0.359561402 |
| ENSGALG00010023784 | 0.062343341 | 0.224527132 |
| ENSGALG00010023786 | 0.033186437 | 0.031802851 |
| ENSGALG00010023787 | 0.274632186 | 0.093812359 |
| ENSGALG00010023788 | 0.504635697 | 0.336317259 |

|                    |             |             |
|--------------------|-------------|-------------|
| ENSGALG00010023789 | 0.591924376 | 0.235659208 |
| ENSGALG00010023790 | 0.18361269  | 0.179546988 |
| ENSGALG00010023791 | 0.869891044 | 0.301728017 |
| ENSGALG00010023792 | 0.920064556 | 0.321401662 |
| ENSGALG00010023793 | 0.843668832 | 0.428007724 |
| ENSGALG00010023794 | 0.949111051 | 0.193125103 |
| ENSGALG00010023795 | 0.853037871 | 0.318165115 |
| ENSGALG00010023798 | 0.822997261 | 0.202853793 |
| ENSGALG00010023799 | 0.952122879 | 0.350301319 |
| ENSGALG00010023800 | 0.948858322 | 0.219093769 |
| ENSGALG00010023802 | 0.864937096 | 0.215543857 |
| ENSGALG00010023803 | 0.682479832 | 0.210753172 |
| ENSGALG00010023804 | 0.172911281 | 0.120219707 |
| ENSGALG00010023805 | 0.81678081  | 0.199994501 |
| ENSGALG00010023806 | 0.983615315 | 0.310218397 |
| ENSGALG00010023807 | 0.919954359 | 0.167849329 |
| ENSGALG00010023808 | 0.914586621 | 0.205983403 |
| ENSGALG00010023809 | 0.92419192  | 0.381773181 |
| ENSGALG00010023811 | 0.965475276 | 0.367164069 |
| ENSGALG00010023813 | 0.277566769 | 0.107857127 |
| ENSGALG00010023815 | 0.585986486 | 0.355036868 |
| ENSGALG00010023817 | 0.91115932  | 0.193228073 |
| ENSGALG00010023818 | 0.861368532 | 0.350233115 |
| ENSGALG00010023819 | 0.931697855 | 0.429233075 |
| ENSGALG00010023820 | 0.553702501 | 0.064845178 |
| ENSGALG00010023821 | 0.872274686 | 0.145301997 |
| ENSGALG00010023822 | 0.947372421 | 0.33961358  |
| ENSGALG00010023823 | 0.822687215 | 0.199663241 |
| ENSGALG00010023826 | 0.082620896 | 0.08126272  |
| ENSGALG00010023827 | 0.329661263 | 0.151807418 |
| ENSGALG00010023828 | 0.644080509 | 0.03444992  |
| ENSGALG00010023829 | 0.430056041 | 0.123307063 |
| ENSGALG00010023830 | 0.705934774 | 0.349333721 |
| ENSGALG00010023831 | 0.50224189  | 0.304310982 |
| ENSGALG00010023832 | 0.374061733 | 0.202918729 |
| ENSGALG00010023833 | 0.874181903 | 0.348084925 |
| ENSGALG00010023834 | 0.58842481  | 0.228910828 |
| ENSGALG00010023835 | 0.980002199 | 0.382834835 |
| ENSGALG00010023836 | 0.734764094 | 0.213719857 |
| ENSGALG00010023837 | 0.967950359 | 0.241021052 |
| ENSGALG00010023838 | 0.992707996 | 0.342172296 |
| ENSGALG00010023840 | 0.812403923 | 0.135071898 |
| ENSGALG00010023841 | 0.597769709 | 0.017869425 |
| ENSGALG00010023842 | 0.92188737  | 0.303274491 |
| ENSGALG00010023843 | 0.709717284 | 0.231313921 |
| ENSGALG00010023845 | 0.216854643 | 0.100923479 |
| ENSGALG00010023847 | 0.981211809 | 0.298691556 |
| ENSGALG00010023849 | 0.30622539  | 0.12456887  |
| ENSGALG00010023850 | 0.948776778 | 0.366907383 |
| ENSGALG00010023851 | 0.500071497 | 0.296266538 |
| ENSGALG00010023852 | 0.904549101 | 0.232984064 |
| ENSGALG00010023854 | 0.537118235 | 0.117288    |
| ENSGALG00010023857 | 0.737873073 | 0.467187998 |
| ENSGALG00010023858 | 0.390466756 | 0.106163828 |
| ENSGALG00010023859 | 0.768966884 | 0.290295246 |
| ENSGALG00010023860 | 0.851439429 | 0.296113046 |

|                    |             |             |
|--------------------|-------------|-------------|
| ENSGALG00010023861 | 0.772635152 | 0.304476088 |
| ENSGALG00010023862 | 0.872468681 | 0.219168285 |
| ENSGALG00010023863 | 0.723415313 | 0.400283995 |
| ENSGALG00010023864 | 0.956617898 | 0.314646387 |
| ENSGALG00010023866 | 0.918000287 | 0.380685492 |
| ENSGALG00010023867 | 0.877279606 | 0.474338443 |
| ENSGALG00010023869 | 0.520756827 | 0.173569384 |
| ENSGALG00010023871 | 0.912334363 | 0.329115959 |
| ENSGALG00010023872 | 0.812037447 | 0.261580288 |
| ENSGALG00010023874 | 0.983797539 | 0.281614284 |
| ENSGALG00010023875 | 0.397831073 | 0.425497365 |
| ENSGALG00010023876 | 0.613535088 | 0.018140172 |
| ENSGALG00010023878 | 0.97017313  | 0.327510325 |
| ENSGALG00010023879 | 0.633473825 | 0.290917368 |
| ENSGALG00010023880 | 0.649824708 | 0.183381784 |
| ENSGALG00010023881 | 0.745725555 | 0.314471417 |
| ENSGALG00010023883 | 0.862360138 | 0.303653855 |
| ENSGALG00010023884 | 0.736569358 | 0.092056202 |
| ENSGALG00010023885 | 0.915201912 | 0.333569912 |
| ENSGALG00010023886 | 0.971787264 | 0.377211602 |
| ENSGALG00010023887 | 0.936654421 | 0.31136357  |
| ENSGALG00010023888 | 0.957187889 | 0.249468741 |
| ENSGALG00010023889 | 0.832040122 | 0.153263176 |
| ENSGALG00010023890 | 0.620658295 | 0.293519121 |
| ENSGALG00010023891 | 0.621315059 | 0.000332034 |
| ENSGALG00010023894 | 0.907533367 | 0.254969984 |
| ENSGALG00010023895 | 0.360611506 | 0.184110222 |
| ENSGALG00010023896 | 0.676619151 | 0.247856788 |
| ENSGALG00010023902 | 0.912113522 | 0.467154971 |
| ENSGALG00010023903 | 0.108099198 | 0.032051756 |
| ENSGALG00010023906 | 0.298206494 | 0.36290518  |
| ENSGALG00010023909 | 0.769591395 | 0.214923149 |
| ENSGALG00010023910 | 0.981012843 | 0.262688988 |
| ENSGALG00010023911 | 0.753007977 | 0.278728769 |
| ENSGALG00010023912 | 0.797056042 | 0.233243617 |
| ENSGALG00010023913 | 0.428073908 | 0.388937358 |
| ENSGALG00010023914 | 0.906082902 | 0.247267713 |
| ENSGALG00010023917 | 0.190266623 | 0.453669804 |
| ENSGALG00010023918 | 0.950662783 | 0.270497509 |
| ENSGALG00010023920 | 0.144053007 | 0.068080557 |
| ENSGALG00010023921 | 0.840701425 | 0.095351219 |
| ENSGALG00010023923 | 0.893538113 | 0.350729237 |
| ENSGALG00010023925 | 0.94960542  | 0.274952255 |
| ENSGALG00010023926 | 0.901881539 | 0.245252013 |
| ENSGALG00010023927 | 0.956845633 | 0.370918807 |
| ENSGALG00010023930 | 0.13811827  | 0.307094306 |
| ENSGALG00010023931 | 0.779494941 | 0.380023919 |
| ENSGALG00010023936 | 0.478167583 | 0.139734341 |
| ENSGALG00010023937 | 0.964785521 | 0.289992345 |
| ENSGALG00010023938 | 0.352442969 | 0.236447956 |
| ENSGALG00010023939 | 0.002908085 | 0.034405677 |
| ENSGALG00010023940 | 0.957029318 | 0.364134369 |
| ENSGALG00010023941 | 0.07069158  | 0.39804429  |
| ENSGALG00010023942 | 0.969768504 | 0.385317856 |
| ENSGALG00010023944 | 0.200570274 | 0.091667991 |
| ENSGALG00010023945 | 0.908645511 | 0.372554007 |

|                    |             |             |
|--------------------|-------------|-------------|
| ENSGALG00010023946 | 0.917744836 | 0.309679569 |
| ENSGALG00010023947 | 0.156157181 | 0.387596908 |
| ENSGALG00010023948 | 0.961519069 | 0.235325464 |
| ENSGALG00010023949 | 0.397152239 | 0.070389111 |
| ENSGALG00010023953 | 0.936883793 | 0.438999264 |
| ENSGALG00010023954 | 0.726408571 | 0.328469985 |
| ENSGALG00010023955 | 0.104578818 | 0.09343012  |
| ENSGALG00010023956 | 0.936794704 | 0.354744973 |
| ENSGALG00010023957 | 0.997799459 | 0.345445892 |
| ENSGALG00010023959 | 0.672955182 | 0.022965583 |
| ENSGALG00010023960 | 0.6021949   | 0.04301688  |
| ENSGALG00010023962 | 0.451619587 | 0.118509443 |
| ENSGALG00010023963 | 0.562717383 | 0.104239849 |
| ENSGALG00010023964 | 0.884428049 | 0.39193876  |
| ENSGALG00010023965 | 0.914359563 | 0.31691033  |
| ENSGALG00010023966 | 0.845141463 | 0.320927715 |
| ENSGALG00010023967 | 0.416405993 | 0.051714552 |
| ENSGALG00010023968 | 0.915039858 | 0.307836581 |
| ENSGALG00010023969 | 0.266137114 | 0.107784983 |
| ENSGALG00010023971 | 0.359423266 | 0.191109669 |
| ENSGALG00010023972 | 0.877168693 | 0.398026361 |
| ENSGALG00010023973 | 0.117321144 | 0.307147193 |
| ENSGALG00010023974 | 0.985313903 | 0.292059767 |
| ENSGALG00010023978 | 0.966531684 | 0.328942406 |
| ENSGALG00010023979 | 0.295616522 | 0.090723462 |
| ENSGALG00010023980 | 0.370747868 | 0.079551735 |
| ENSGALG00010023981 | 0.846826886 | 0.327357398 |
| ENSGALG00010023982 | 0.223104079 | 0.194413031 |
| ENSGALG00010023983 | 0.400215036 | 0.132215663 |
| ENSGALG00010023984 | 0.922596106 | 0.290872751 |
| ENSGALG00010023986 | 0.177461543 | 0.306723528 |
| ENSGALG00010023987 | 0.688287329 | 0.174255804 |
| ENSGALG00010023989 | 0.09256207  | 0.159732277 |
| ENSGALG00010023991 | 0.875703322 | 0.17414117  |
| ENSGALG00010023992 | 0.661461841 | 0.38904805  |
| ENSGALG00010023993 | 0.778082061 | 0.21614252  |
| ENSGALG00010023996 | 0.856601303 | 0.097790814 |
| ENSGALG00010023997 | 0.984278707 | 0.341158909 |
| ENSGALG00010023998 | 0.582031621 | 0.001568817 |
| ENSGALG00010023999 | 0.646281189 | 0.446419641 |
| ENSGALG00010024001 | 0.945682253 | 0.348937381 |
| ENSGALG00010024002 | 0.576721149 | 0.011488473 |
| ENSGALG00010024003 | 0.917298932 | 0.398179367 |
| ENSGALG00010024004 | 0.860706885 | 0.309515251 |
| ENSGALG00010024005 | 0.953339611 | 0.306717714 |
| ENSGALG00010024008 | 0.924888608 | 0.392864657 |
| ENSGALG00010024009 | 0.764734738 | 0.028914713 |
| ENSGALG00010024010 | 0.974060085 | 0.33903007  |
| ENSGALG00010024011 | 0.969414343 | 0.246688096 |
| ENSGALG00010024013 | 0.973212872 | 0.271763719 |
| ENSGALG00010024014 | 0.994699132 | 0.337012579 |
| ENSGALG00010024015 | 0.216433634 | 0.680598293 |
| ENSGALG00010024016 | 0.895728789 | 0.376886014 |
| ENSGALG00010024017 | 0.749394846 | 0.243246269 |
| ENSGALG00010024018 | 0.996462935 | 0.344678076 |
| ENSGALG00010024019 | 0.708805481 | 0.275187014 |

|                    |             |             |
|--------------------|-------------|-------------|
| ENSGALG00010024020 | 0.867092569 | 0.312231358 |
| ENSGALG00010024021 | 0.48197906  | 0.081963142 |
| ENSGALG00010024023 | 0.976993451 | 0.322858396 |
| ENSGALG00010024024 | 0.99439029  | 0.314359675 |
| ENSGALG00010024025 | 0.979766242 | 0.323778175 |
| ENSGALG00010024026 | 0.754865858 | 0.430293671 |
| ENSGALG00010024028 | 0.531335435 | 0.288731318 |
| ENSGALG00010024029 | 0.606084414 | 0.253395198 |
| ENSGALG00010024030 | 0.965034395 | 0.299536693 |
| ENSGALG00010024031 | 0.751722528 | 0.444747418 |
| ENSGALG00010024032 | 0.371558109 | 0.423898957 |
| ENSGALG00010024034 | 0.035350163 | 0.019912966 |
| ENSGALG00010024035 | 0.574502777 | 0.397067528 |
| ENSGALG00010024037 | 0.126324028 | 0.034819573 |
| ENSGALG00010024038 | 0.868406946 | 0.075132863 |
| ENSGALG00010024039 | 0.553041257 | 0.00907853  |
| ENSGALG00010024040 | 0.653704324 | 0.176204078 |
| ENSGALG00010024041 | 0.137855553 | 0.293890864 |
| ENSGALG00010024042 | 0.912036849 | 0.25108167  |
| ENSGALG00010024043 | 0.447373657 | 0.184053152 |
| ENSGALG00010024044 | 0.05112109  | 0.231227304 |
| ENSGALG00010024045 | 0.891028943 | 0.28452427  |
| ENSGALG00010024047 | 0.97396033  | 0.233577492 |
| ENSGALG00010024049 | 0.476988233 | 0.235688974 |
| ENSGALG00010024051 | 0.997182087 | 0.336667203 |
| ENSGALG00010024052 | 0.916091114 | 0.253412086 |
| ENSGALG00010024053 | 0.499840346 | 0.201293354 |
| ENSGALG00010024054 | 0.048522101 | 0.113076891 |
| ENSGALG00010024056 | 0.620540855 | 0.071419948 |
| ENSGALG00010024057 | 0.947503492 | 0.251335802 |
| ENSGALG00010024058 | 0.725090021 | 0.232479175 |
| ENSGALG00010024060 | 0.8642565   | 0.278192591 |
| ENSGALG00010024061 | 0.262922434 | 0.138601464 |
| ENSGALG00010024062 | 0.875843964 | 0.262390485 |
| ENSGALG00010024063 | 0.927593497 | 0.185873629 |
| ENSGALG00010024064 | 0.356290077 | 0.026301218 |
| ENSGALG00010024065 | 0.824737324 | 0.313423516 |
| ENSGALG00010024066 | 0.360294103 | 0.034700385 |
| ENSGALG00010024067 | 0.874876159 | 0.395836993 |
| ENSGALG00010024068 | 0.932852982 | 0.28754108  |
| ENSGALG00010024069 | 0.670746059 | 0.169405533 |
| ENSGALG00010024070 | 0.357147265 | 0.343232312 |
| ENSGALG00010024071 | 0.924798793 | 0.438504542 |
| ENSGALG00010024072 | 0.285272007 | 0.109169955 |
| ENSGALG00010024073 | 0.300802144 | 0.235170054 |
| ENSGALG00010024074 | 0.938380487 | 0.298246925 |
| ENSGALG00010024075 | 0.986982301 | 0.339958075 |
| ENSGALG00010024076 | 0.310179942 | 0.17632649  |
| ENSGALG00010024077 | 0.702548876 | 0.26274626  |
| ENSGALG00010024078 | 0.933449004 | 0.261567391 |
| ENSGALG00010024079 | 0.877230931 | 0.38523536  |
| ENSGALG00010024080 | 0.971100069 | 0.280153701 |
| ENSGALG00010024081 | 0.456484278 | 0.121976299 |
| ENSGALG00010024082 | 0.161377811 | 0.146430816 |
| ENSGALG00010024083 | 0.977995676 | 0.377561498 |
| ENSGALG00010024085 | 0.51609489  | 0.164505088 |



|                    |             |             |
|--------------------|-------------|-------------|
| ENSGALG00010024086 | 0.088023759 | 0.267686088 |
| ENSGALG00010024087 | 0.216433634 | 0.680598293 |
| ENSGALG00010024089 | 0.473351661 | 0.011868739 |
| ENSGALG00010024090 | 0.693839902 | 0.143514781 |
| ENSGALG00010024091 | 0.954508194 | 0.366396619 |
| ENSGALG00010024092 | 0.417149349 | 0.144531054 |
| ENSGALG00010024093 | 0.814904523 | 0.097117889 |
| ENSGALG00010024094 | 0.265558089 | 0.028821141 |
| ENSGALG00010024095 | 0.930423481 | 0.211082171 |
| ENSGALG00010024096 | 0.916854266 | 0.251935257 |
| ENSGALG00010024099 | 0.411042209 | 0.405776208 |
| ENSGALG00010024101 | 0.61113471  | 0.064504647 |
| ENSGALG00010024102 | 0.705182637 | 0.323425353 |
| ENSGALG00010024104 | 0.343448205 | 0.289739478 |
| ENSGALG00010024106 | 0.875632043 | 0.2581533   |
| ENSGALG00010024107 | 0.560037501 | 0.211796087 |
| ENSGALG00010024110 | 0.971059194 | 0.382620561 |
| ENSGALG00010024111 | 0.300468035 | 0.258773229 |
| ENSGALG00010024112 | 0.983678345 | 0.383114234 |
| ENSGALG00010024113 | 0.963595834 | 0.419528911 |
| ENSGALG00010024114 | 0.285272007 | 0.109169955 |
| ENSGALG00010024115 | 0.796027408 | 0.280446759 |
| ENSGALG00010024116 | 0.972398009 | 0.420374748 |
| ENSGALG00010024117 | 0.219386918 | 0.079388121 |
| ENSGALG00010024118 | 0.921852296 | 0.316390748 |
| ENSGALG00010024119 | 0.947081029 | 0.258714905 |
| ENSGALG00010024120 | 0.394443593 | 0.09072273  |
| ENSGALG00010024121 | 0.921772761 | 0.303818346 |
| ENSGALG00010024122 | 0.973872163 | 0.367948352 |
| ENSGALG00010024123 | 0.558114528 | 0.232579037 |
| ENSGALG00010024124 | 0.683082269 | 0.694778198 |
| ENSGALG00010024126 | 0.907639118 | 0.42300725  |
| ENSGALG00010024128 | 0.89357648  | 0.247827819 |
| ENSGALG00010024129 | 0.898807911 | 0.308760727 |
| ENSGALG00010024130 | 0.282390713 | 0.086738369 |
| ENSGALG00010024132 | 0.984166658 | 0.413467998 |
| ENSGALG00010024133 | 0.964033393 | 0.357324331 |
| ENSGALG00010024134 | 0.203991683 | 0.058221925 |
| ENSGALG00010024135 | 0.985617392 | 0.322109411 |
| ENSGALG00010024136 | 0.282565391 | 0.08222932  |
| ENSGALG00010024137 | 0.987713863 | 0.32415635  |
| ENSGALG00010024138 | 0.98601536  | 0.277880618 |
| ENSGALG00010024139 | 0.991219017 | 0.315342687 |
| ENSGALG00010024140 | 0.319961911 | 0.076840466 |
| ENSGALG00010024141 | 0.253037397 | 0.325238276 |
| ENSGALG00010024142 | 0.765097831 | 0.262071711 |
| ENSGALG00010024143 | 0.993252319 | 0.280451834 |
| ENSGALG00010024144 | 0.858606386 | 0.387068677 |
| ENSGALG00010024145 | 0.04485282  | 0.206333841 |
| ENSGALG00010024146 | 0.246181364 | 0.082928468 |
| ENSGALG00010024147 | 0.918580542 | 0.363917737 |
| ENSGALG00010024148 | 0.978184293 | 0.259585376 |
| ENSGALG00010024149 | 0.944049993 | 0.42523136  |
| ENSGALG00010024150 | 0.792580437 | 0.139045495 |
| ENSGALG00010024151 | 0.946566084 | 0.240130965 |
| ENSGALG00010024152 | 0.944086697 | 0.346729109 |

|                    |             |             |
|--------------------|-------------|-------------|
| ENSGALG00010024153 | 0.305838704 | 0.315015182 |
| ENSGALG00010024154 | 0.893507478 | 0.636199611 |
| ENSGALG00010024155 | 0.913926807 | 0.260330917 |
| ENSGALG00010024156 | 0.516703067 | 0.106045665 |
| ENSGALG00010024157 | 0.849981593 | 0.268000526 |
| ENSGALG00010024158 | 0.179699172 | 0.053815743 |
| ENSGALG00010024159 | 0.919231567 | 0.340070537 |
| ENSGALG00010024160 | 0.043659357 | 0.108092216 |
| ENSGALG00010024162 | 0.755168063 | 0.394873083 |
| ENSGALG00010024163 | 0.97420654  | 0.333772591 |
| ENSGALG00010024164 | 0.735002391 | 0.20432368  |
| ENSGALG00010024165 | 0.562606237 | 0.013379815 |
| ENSGALG00010024166 | 0.531439801 | 0.228363633 |
| ENSGALG00010024167 | 0.694135851 | 0.206839731 |
| ENSGALG00010024168 | 0.522281502 | 0.237832467 |
| ENSGALG00010024169 | 0.357515753 | 0.171891932 |
| ENSGALG00010024170 | 0.440958823 | 0.29300341  |
| ENSGALG00010024172 | 0.91535785  | 0.34161249  |
| ENSGALG00010024173 | 0.575366559 | 0.219832896 |
| ENSGALG00010024174 | 0.914218043 | 0.347527861 |
| ENSGALG00010024175 | 0.768121779 | 0.390184258 |
| ENSGALG00010024176 | 0.806400166 | 0.202436907 |
| ENSGALG00010024177 | 0.939082924 | 0.283353589 |
| ENSGALG00010024178 | 0.610037921 | 0.147477821 |
| ENSGALG00010024179 | 0.680800478 | 0.206931468 |
| ENSGALG00010024180 | 0.872756396 | 0.331174065 |
| ENSGALG00010024181 | 0.998643363 | 0.322357776 |
| ENSGALG00010024182 | 0.555263572 | 0.163067513 |
| ENSGALG00010024183 | 0.964988706 | 0.265675309 |
| ENSGALG00010024184 | 0.702973568 | 0.186224372 |
| ENSGALG00010024185 | 0.898397193 | 0.163485781 |
| ENSGALG00010024186 | 0.980238965 | 0.361163722 |
| ENSGALG00010024187 | 0.928782001 | 0.318781044 |
| ENSGALG00010024188 | 0.905199852 | 0.274468624 |
| ENSGALG00010024189 | 0.725355825 | 0.099954034 |
| ENSGALG00010024190 | 0.699162127 | 0.269329118 |
| ENSGALG00010024191 | 0.980063621 | 0.28524585  |
| ENSGALG00010024192 | 0.910821826 | 0.55955886  |
| ENSGALG00010024193 | 0.904054629 | 0.299057778 |
| ENSGALG00010024194 | 0.968807902 | 0.381762349 |
| ENSGALG00010024195 | 0.941137365 | 0.299753379 |
| ENSGALG00010024196 | 0.705024018 | 0.031750344 |
| ENSGALG00010024197 | 0.620133574 | 0.416263711 |
| ENSGALG00010024198 | 0.888609868 | 0.437472006 |
| ENSGALG00010024199 | 0.552568221 | 0.273575816 |
| ENSGALG00010024200 | 0.984474051 | 0.268184996 |
| ENSGALG00010024201 | 0.900383539 | 0.185243863 |
| ENSGALG00010024202 | 0.337879886 | 0.062255476 |
| ENSGALG00010024203 | 0.685666463 | 0.067801887 |
| ENSGALG00010024204 | 0.863463293 | 0.360902134 |
| ENSGALG00010024205 | 0.906134097 | 0.31677363  |
| ENSGALG00010024206 | 0.637940332 | 0.559304839 |
| ENSGALG00010024207 | 0.473274684 | 0.024337086 |
| ENSGALG00010024208 | 0.994441733 | 0.335513709 |
| ENSGALG00010024209 | 0.023594547 | 0.219067378 |
| ENSGALG00010024210 | 0.017871382 | 0.169452493 |

|                    |             |             |
|--------------------|-------------|-------------|
| ENSGALG00010024211 | 0.390861112 | 0.306774675 |
| ENSGALG00010024212 | 0.948483226 | 0.306452538 |
| ENSGALG00010024213 | 0.599632921 | 0.162644539 |
| ENSGALG00010024214 | 0.41997115  | 0.735256301 |
| ENSGALG00010024215 | 0.40135901  | 0.158038591 |
| ENSGALG00010024218 | 0.215971014 | 0.287078286 |
| ENSGALG00010024220 | 0.823899404 | 0.307430261 |
| ENSGALG00010024221 | 0.933447558 | 0.220766653 |
| ENSGALG00010024222 | 0.278098273 | 0.380595449 |
| ENSGALG00010024223 | 0.780833603 | 0.559265129 |
| ENSGALG00010024224 | 0.583726226 | 0.120748184 |
| ENSGALG00010024225 | 0.532640203 | 0.080229553 |
| ENSGALG00010024226 | 0.982809135 | 0.348071085 |
| ENSGALG00010024227 | 0.34525571  | 0.119899837 |
| ENSGALG00010024228 | 0.349000274 | 0.018432695 |
| ENSGALG00010024229 | 0.954253389 | 0.430098334 |
| ENSGALG00010024230 | 0.956619003 | 0.334890282 |
| ENSGALG00010024231 | 0.453780517 | 0.178712415 |
| ENSGALG00010024232 | 0.695884453 | 0.276219019 |
| ENSGALG00010024233 | 0.06780546  | 0.070637038 |
| ENSGALG00010024234 | 0.920698834 | 0.234391233 |
| ENSGALG00010024236 | 0.534258486 | 0.171291874 |
| ENSGALG00010024237 | 0.19570691  | 0.192118931 |
| ENSGALG00010024238 | 0.975190199 | 0.289841379 |
| ENSGALG00010024240 | 0.72431654  | 0.41342     |
| ENSGALG00010024241 | 0.553844186 | 0.199848708 |
| ENSGALG00010024242 | 0.74595891  | 0.166817323 |
| ENSGALG00010024243 | 0.382314229 | 0.323101603 |
| ENSGALG00010024245 | 0.987622028 | 0.330365263 |
| ENSGALG00010024248 | 0.136156562 | 0.206808112 |
| ENSGALG00010024250 | 0.859559327 | 0.536151548 |
| ENSGALG00010024251 | 0.976194362 | 0.352778379 |
| ENSGALG00010024252 | 0.124893167 | 0.123664865 |
| ENSGALG00010024254 | 0.889420171 | 0.162723268 |
| ENSGALG00010024255 | 0.891298202 | 0.200053022 |
| ENSGALG00010024256 | 0.160630103 | 0.195466318 |
| ENSGALG00010024258 | 0.624152598 | 0.311031094 |
| ENSGALG00010024259 | 0.965670858 | 0.322475932 |
| ENSGALG00010024263 | 0.989978395 | 0.306643831 |
| ENSGALG00010024264 | 0.96196715  | 0.402443649 |
| ENSGALG00010024265 | 0.115416321 | 0.123848617 |
| ENSGALG00010024266 | 0.505842873 | 0.539622835 |
| ENSGALG00010024267 | 0.759703053 | 0.336050222 |
| ENSGALG00010024270 | 0.963645604 | 0.317841953 |
| ENSGALG00010024272 | 0.383947044 | 0.128562519 |
| ENSGALG00010024273 | 0.579541593 | 0.209548455 |
| ENSGALG00010024274 | 0.987359673 | 0.363140361 |
| ENSGALG00010024275 | 0.719613177 | 0.080396286 |
| ENSGALG00010024276 | 0.747850837 | 0.312559162 |
| ENSGALG00010024277 | 0.785516777 | 0.097209311 |
| ENSGALG00010024278 | 0.008588083 | 0.163472264 |
| ENSGALG00010024280 | 0.923340219 | 0.327901885 |
| ENSGALG00010024282 | 0.938472478 | 0.241735951 |
| ENSGALG00010024283 | 0.670242187 | 0.041769806 |
| ENSGALG00010024285 | 0.694095506 | 0.362040559 |
| ENSGALG00010024286 | 0.307745884 | 0.173030822 |

|                    |             |             |
|--------------------|-------------|-------------|
| ENSGALG00010024287 | 0.483744414 | 0.179181822 |
| ENSGALG00010024288 | 0.935028593 | 0.231357093 |
| ENSGALG00010024289 | 0.058009884 | 0.259299954 |
| ENSGALG00010024290 | 0.455588518 | 0.386125355 |
| ENSGALG00010024291 | 0.741210447 | 0.001371915 |
| ENSGALG00010024292 | 0.241638714 | 0.135130836 |
| ENSGALG00010024293 | 0.644347911 | 0.095730054 |
| ENSGALG00010024295 | 0.078844566 | 0.039732258 |
| ENSGALG00010024296 | 0.286398484 | 0.038855808 |
| ENSGALG00010024300 | 0.26724906  | 0.207302423 |
| ENSGALG00010024302 | 0.270451009 | 0.090541667 |
| ENSGALG00010024303 | 0.86271864  | 0.281733221 |
| ENSGALG00010024304 | 0.740305824 | 0.344204136 |
| ENSGALG00010024305 | 0.896313593 | 0.249203275 |
| ENSGALG00010024309 | 0.978234208 | 0.246189888 |
| ENSGALG00010024311 | 0.942945674 | 0.164075482 |
| ENSGALG00010024313 | 0.96296839  | 0.214736651 |
| ENSGALG00010024314 | 0.862404771 | 0.315155569 |
| ENSGALG00010024316 | 0.666072151 | 0.022482376 |
| ENSGALG00010024317 | 0.560588614 | 0.159716999 |
| ENSGALG00010024321 | 0.80234747  | 0.160455877 |
| ENSGALG00010024322 | 0.98640537  | 0.35188617  |
| ENSGALG00010024323 | 0.149535722 | 0.068962659 |
| ENSGALG00010024325 | 0.862584997 | 0.342249514 |
| ENSGALG00010024326 | 0.141170608 | 0.0585404   |
| ENSGALG00010024327 | 0.897724576 | 0.175687641 |
| ENSGALG00010024328 | 0.396615883 | 0.054829952 |
| ENSGALG00010024330 | 0.976274835 | 0.241859513 |
| ENSGALG00010024332 | 0.928792003 | 0.259112604 |
| ENSGALG00010024333 | 0.281831589 | 0.169178248 |
| ENSGALG00010024334 | 0.985158647 | 0.316352496 |
| ENSGALG00010024335 | 0.763723873 | 0.327278743 |
| ENSGALG00010024336 | 0.953492229 | 0.293443388 |
| ENSGALG00010024337 | 0.054101188 | 0.196447772 |
| ENSGALG00010024338 | 0.414392356 | 0.086207952 |
| ENSGALG00010024339 | 0.377109681 | 0.165960302 |
| ENSGALG00010024340 | 0.956128017 | 0.273855424 |
| ENSGALG00010024342 | 0.98279423  | 0.310857809 |
| ENSGALG00010024343 | 0.993156861 | 0.337531531 |
| ENSGALG00010024344 | 0.300742251 | 0.20883146  |
| ENSGALG00010024345 | 0.321663115 | 0.58615923  |
| ENSGALG00010024346 | 0.42516356  | 0.082151133 |
| ENSGALG00010024347 | 0.888208889 | 0.369220805 |
| ENSGALG00010024348 | 0.525684152 | 0.203083479 |
| ENSGALG00010024349 | 0.569457283 | 0.185093444 |
| ENSGALG00010024350 | 0.995186503 | 0.32538432  |
| ENSGALG00010024351 | 0.859036335 | 0.221887125 |
| ENSGALG00010024352 | 0.325513958 | 0.002237464 |
| ENSGALG00010024353 | 0.374990794 | 0.095543633 |
| ENSGALG00010024354 | 0.924200145 | 0.253847418 |
| ENSGALG00010024355 | 0.121435942 | 0.130497039 |
| ENSGALG00010024356 | 0.871993098 | 0.294239668 |
| ENSGALG00010024357 | 0.34081212  | 0.34730063  |
| ENSGALG00010024358 | 0.950896939 | 0.3675656   |
| ENSGALG00010024359 | 0.403975313 | 0.210042477 |
| ENSGALG00010024360 | 0.93809323  | 0.405267509 |

|                    |             |             |
|--------------------|-------------|-------------|
| ENSGALG00010024361 | 0.101848016 | 0.328795008 |
| ENSGALG00010024362 | 0.759144895 | 0.274941017 |
| ENSGALG00010024363 | 0.92421773  | 0.444420018 |
| ENSGALG00010024364 | 0.256111629 | 0.409080009 |
| ENSGALG00010024365 | 0.951515415 | 0.29100591  |
| ENSGALG00010024366 | 0.297741951 | 0.095008226 |
| ENSGALG00010024367 | 0.039056979 | 0.063555219 |
| ENSGALG00010024368 | 0.728616235 | 0.249019073 |
| ENSGALG00010024369 | 0.990246785 | 0.314954392 |
| ENSGALG00010024370 | 0.96947825  | 0.265452472 |
| ENSGALG00010024371 | 0.926830509 | 0.286390453 |
| ENSGALG00010024373 | 0.993968977 | 0.351056436 |
| ENSGALG00010024374 | 0.982971037 | 0.358673173 |
| ENSGALG00010024376 | 0.279307332 | 0.330709573 |
| ENSGALG00010024377 | 0.832344409 | 0.180303167 |
| ENSGALG00010024378 | 0.700438333 | 0.237638469 |
| ENSGALG00010024380 | 0.371293896 | 0.683259107 |
| ENSGALG00010024382 | 0.306756732 | 0.327062686 |
| ENSGALG00010024383 | 0.97680145  | 0.352296304 |
| ENSGALG00010024384 | 0.36437197  | 0.115555231 |
| ENSGALG00010024386 | 0.946120875 | 0.372447118 |
| ENSGALG00010024387 | 0.66229661  | 0.308173107 |
| ENSGALG00010024388 | 0.88460955  | 0.400714472 |
| ENSGALG00010024389 | 0.958433884 | 0.336442111 |
| ENSGALG00010024390 | 0.848926858 | 0.118144942 |
| ENSGALG00010024391 | 0.898923763 | 0.263775317 |
| ENSGALG00010024392 | 0.981726533 | 0.335951824 |
| ENSGALG00010024393 | 0.745954491 | 0.012573642 |
| ENSGALG00010024394 | 0.524974397 | 0.236555333 |
| ENSGALG00010024396 | 0.782143223 | 0.330569409 |
| ENSGALG00010024397 | 0.290122505 | 0.464993379 |
| ENSGALG00010024398 | 0.733530075 | 0.207300024 |
| ENSGALG00010024399 | 0.945507512 | 0.238718466 |
| ENSGALG00010024400 | 0.730051702 | 0.023873644 |
| ENSGALG00010024401 | 0.94771443  | 0.369086826 |
| ENSGALG00010024402 | 0.986089243 | 0.365336158 |
| ENSGALG00010024403 | 0.543912245 | 0.445639322 |
| ENSGALG00010024404 | 0.219982136 | 0.067777564 |
| ENSGALG00010024405 | 0.394494248 | 0.128304162 |
| ENSGALG00010024406 | 0.493944368 | 0.007579746 |
| ENSGALG00010024407 | 0.822106224 | 0.179298165 |
| ENSGALG00010024409 | 0.654172822 | 0.239627258 |
| ENSGALG00010024410 | 0.939249224 | 0.297047629 |
| ENSGALG00010024411 | 0.081605615 | 0.316663828 |
| ENSGALG00010024412 | 0.894237202 | 0.144383439 |
| ENSGALG00010024413 | 0.969331077 | 0.398687953 |
| ENSGALG00010024414 | 0.896780116 | 0.331752071 |
| ENSGALG00010024415 | 0.893098686 | 0.206534817 |
| ENSGALG00010024416 | 0.668121329 | 0.141282544 |
| ENSGALG00010024418 | 0.037531409 | 0.198315327 |
| ENSGALG00010024419 | 0.262272194 | 0.246897288 |
| ENSGALG00010024420 | 0.378770369 | 0.182010471 |
| ENSGALG00010024421 | 0.191554037 | 0.346673119 |
| ENSGALG00010024423 | 0.442136407 | 0.16808539  |
| ENSGALG00010024424 | 0.602949015 | 0.163139349 |
| ENSGALG00010024425 | 0.946186299 | 0.272644626 |

|                    |             |             |
|--------------------|-------------|-------------|
| ENSGALG00010024426 | 0.486630026 | 0.077363626 |
| ENSGALG00010024427 | 0.954865792 | 0.265593765 |
| ENSGALG00010024428 | 0.905334068 | 0.26161319  |
| ENSGALG00010024430 | 0.094278299 | 0.214518607 |
| ENSGALG00010024431 | 0.665219189 | 0.158210097 |
| ENSGALG00010024433 | 0.85255321  | 0.322427061 |
| ENSGALG00010024434 | 0.421367771 | 0.056980992 |
| ENSGALG00010024437 | 0.921041112 | 0.355376791 |
| ENSGALG00010024438 | 0.855377832 | 0.358705465 |
| ENSGALG00010024439 | 0.976766196 | 0.393848383 |
| ENSGALG00010024440 | 0.996964743 | 0.310337661 |
| ENSGALG00010024441 | 0.946549793 | 0.272645677 |
| ENSGALG00010024442 | 0.062393725 | 0.163601889 |
| ENSGALG00010024446 | 0.298345482 | 0.168936545 |
| ENSGALG00010024449 | 0.937687803 | 0.343427512 |
| ENSGALG00010024451 | 0.193560686 | 0.051572353 |
| ENSGALG00010024452 | 0.923207365 | 0.275771477 |
| ENSGALG00010024453 | 0.58708625  | 0.190948712 |
| ENSGALG00010024454 | 0.372565772 | 0.258158389 |
| ENSGALG00010024455 | 0.235386633 | 0.576334352 |
| ENSGALG00010024456 | 0.420587617 | 0.221407689 |
| ENSGALG00010024457 | 0.814440789 | 0.270544962 |
| ENSGALG00010024459 | 0.97920429  | 0.274504665 |
| ENSGALG00010024460 | 0.847103313 | 0.363656718 |
| ENSGALG00010024462 | 0.195616753 | 0.017793808 |
| ENSGALG00010024463 | 0.717453766 | 0.151103561 |
| ENSGALG00010024464 | 0.746308201 | 0.216902622 |
| ENSGALG00010024465 | 0.780523086 | 0.263854289 |
| ENSGALG00010024466 | 0.413687687 | 0.012270907 |
| ENSGALG00010024467 | 0.903113941 | 0.20086854  |
| ENSGALG00010024469 | 0.114859951 | 0.072620953 |
| ENSGALG00010024470 | 0.421519706 | 0.326436763 |
| ENSGALG00010024471 | 0.463952287 | 0.041461167 |
| ENSGALG00010024472 | 0.989114173 | 0.32784241  |
| ENSGALG00010024473 | 0.904432941 | 0.189384343 |
| ENSGALG00010024474 | 0.942395058 | 0.312938165 |
| ENSGALG00010024475 | 0.629716211 | 0.333757603 |
| ENSGALG00010024476 | 0.355103667 | 0.406369538 |
| ENSGALG00010024477 | 0.636925286 | 0.263980061 |
| ENSGALG00010024478 | 0.362208264 | 0.229117202 |
| ENSGALG00010024479 | 0.795502108 | 0.24890471  |
| ENSGALG00010024480 | 0.560720159 | 0.065498826 |
| ENSGALG00010024481 | 0.477031301 | 0.031061569 |
| ENSGALG00010024482 | 0.97724602  | 0.27536714  |
| ENSGALG00010024486 | 0.405598105 | 0.197024946 |
| ENSGALG00010024488 | 0.811573327 | 0.313762984 |
| ENSGALG00010024490 | 0.900456918 | 0.329225006 |
| ENSGALG00010024492 | 0.443706647 | 0.636113511 |
| ENSGALG00010024493 | 0.946772446 | 0.34883034  |
| ENSGALG00010024494 | 0.206872378 | 0.294006858 |
| ENSGALG00010024495 | 0.419809954 | 0.209692258 |
| ENSGALG00010024496 | 0.991886738 | 0.325889153 |
| ENSGALG00010024497 | 0.960522415 | 0.400577485 |
| ENSGALG00010024498 | 0.745417199 | 0.430371777 |
| ENSGALG00010024499 | 0.411709875 | 0.233774138 |
| ENSGALG00010024500 | 0.85100392  | 0.430111268 |

|                    |             |             |
|--------------------|-------------|-------------|
| ENSGALG00010024501 | 0.894788342 | 0.406439456 |
| ENSGALG00010024502 | 0.989225409 | 0.314278076 |
| ENSGALG00010024503 | 0.358264974 | 0.222718588 |
| ENSGALG00010024504 | 0.932881248 | 0.289063515 |
| ENSGALG00010024505 | 0.984716162 | 0.287069872 |
| ENSGALG00010024506 | 0.977189137 | 0.301765131 |
| ENSGALG00010024507 | 0.614816731 | 0.06924813  |
| ENSGALG00010024508 | 0.93565148  | 0.4035489   |
| ENSGALG00010024509 | 0.25310292  | 0.004509242 |
| ENSGALG00010024510 | 0.866769034 | 0.221599439 |
| ENSGALG00010024511 | 0.570967201 | 0.345811581 |
| ENSGALG00010024512 | 0.582128374 | 0.100112354 |
| ENSGALG00010024513 | 0.820465703 | 0.309808729 |
| ENSGALG00010024514 | 0.669411774 | 0.307448069 |
| ENSGALG00010024515 | 0.420105365 | 0.00246261  |
| ENSGALG00010024516 | 0.976541153 | 0.346282839 |
| ENSGALG00010024517 | 0.926502886 | 0.251136033 |
| ENSGALG00010024518 | 0.623577956 | 0.23736519  |
| ENSGALG00010024519 | 0.91347205  | 0.251633679 |
| ENSGALG00010024520 | 0.992247546 | 0.343413731 |
| ENSGALG00010024521 | 0.351650508 | 0.103083755 |
| ENSGALG00010024522 | 0.601181112 | 0.169222213 |
| ENSGALG00010024523 | 0.837233901 | 0.334677824 |
| ENSGALG00010024524 | 0.732395306 | 0.17047981  |
| ENSGALG00010024525 | 0.865390814 | 0.203163316 |
| ENSGALG00010024526 | 0.653990471 | 0.299089903 |
| ENSGALG00010024527 | 0.105509146 | 0.088660351 |
| ENSGALG00010024528 | 0.443683066 | 0.347974878 |
| ENSGALG00010024529 | 0.971615881 | 0.333689181 |
| ENSGALG00010024530 | 0.709181471 | 0.143689578 |
| ENSGALG00010024531 | 0.606378832 | 0.318854128 |
| ENSGALG00010024532 | 0.987451337 | 0.297105872 |
| ENSGALG00010024533 | 0.962062188 | 0.30187078  |
| ENSGALG00010024534 | 0.056329846 | 0.124788368 |
| ENSGALG00010024535 | 0.908011413 | 0.289802287 |
| ENSGALG00010024536 | 0.84956814  | 0.010479029 |
| ENSGALG00010024537 | 0.795389563 | 0.313418231 |
| ENSGALG00010024538 | 0.271701261 | 0.072417625 |
| ENSGALG00010024539 | 0.978103804 | 0.295834202 |
| ENSGALG00010024540 | 0.927050141 | 0.365236609 |
| ENSGALG00010024541 | 0.819110136 | 0.259231697 |
| ENSGALG00010024542 | 0.956129924 | 0.388778807 |
| ENSGALG00010024544 | 0.721349453 | 0.32597117  |
| ENSGALG00010024545 | 0.882423251 | 0.430054572 |
| ENSGALG00010024546 | 0.995571292 | 0.357075407 |
| ENSGALG00010024547 | 0.993333584 | 0.330116766 |
| ENSGALG00010024548 | 0.363656258 | 0.105554037 |
| ENSGALG00010024549 | 0.620366695 | 0.283453462 |
| ENSGALG00010024550 | 0.684924159 | 0.080069634 |
| ENSGALG00010024551 | 0.989572314 | 0.37038694  |
| ENSGALG00010024552 | 0.798085397 | 0.243544033 |
| ENSGALG00010024553 | 0.764340388 | 0.22764294  |
| ENSGALG00010024554 | 0.069183191 | 0.109148621 |
| ENSGALG00010024555 | 0.792518093 | 0.408160938 |
| ENSGALG00010024556 | 0.94526187  | 0.357716709 |
| ENSGALG00010024557 | 0.703835502 | 0.075634491 |

|                    |             |             |
|--------------------|-------------|-------------|
| ENSGALG00010024558 | 0.828084835 | 0.275772124 |
| ENSGALG00010024559 | 0.520924328 | 0.007104511 |
| ENSGALG00010024560 | 0.201073322 | 0.178485389 |
| ENSGALG00010024561 | 0.874568813 | 0.220147561 |
| ENSGALG00010024562 | 0.762268852 | 0.236716063 |
| ENSGALG00010024563 | 0.305820093 | 0.038271891 |
| ENSGALG00010024564 | 0.97540583  | 0.339153307 |
| ENSGALG00010024565 | 0.265891102 | 0.176970097 |
| ENSGALG00010024566 | 0.944253777 | 0.349031723 |
| ENSGALG00010024567 | 0.970480981 | 0.377087436 |
| ENSGALG00010024568 | 0.433930714 | 0.243138129 |
| ENSGALG00010024569 | 0.258340534 | 0.102016698 |
| ENSGALG00010024570 | 0.998919402 | 0.333438041 |
| ENSGALG00010024571 | 0.954501426 | 0.347966514 |
| ENSGALG00010024573 | 0.857180308 | 0.208117038 |
| ENSGALG00010024574 | 0.237340083 | 0.254250233 |
| ENSGALG00010024575 | 0.94691443  | 0.168857687 |
| ENSGALG00010024576 | 0.963097427 | 0.29460877  |
| ENSGALG00010024577 | 0.064315755 | 0.042890996 |
| ENSGALG00010024578 | 0.467566706 | 0.290424436 |
| ENSGALG00010024579 | 0.916102362 | 0.312623029 |
| ENSGALG00010024580 | 0.975473445 | 0.327938537 |
| ENSGALG00010024581 | 0.961816548 | 0.29727456  |
| ENSGALG00010024582 | 0.917012776 | 0.289073621 |
| ENSGALG00010024583 | 0.819163263 | 0.348627411 |
| ENSGALG00010024584 | 0.192273884 | 0.326216822 |
| ENSGALG00010024585 | 0.942011931 | 0.266924282 |
| ENSGALG00010024586 | 0.974396052 | 0.301084805 |
| ENSGALG00010024587 | 0.5924837   | 0.439479214 |
| ENSGALG00010024588 | 0.688350495 | 0.403498763 |
| ENSGALG00010024589 | 0.900756522 | 0.159815087 |
| ENSGALG00010024590 | 0.954520345 | 0.35100248  |
| ENSGALG00010024591 | 0.568120494 | 0.147854416 |
| ENSGALG00010024592 | 0.964209314 | 0.386062614 |
| ENSGALG00010024593 | 0.899856322 | 0.413215331 |
| ENSGALG00010024594 | 0.983843162 | 0.330776316 |
| ENSGALG00010024595 | 0.989736769 | 0.345415666 |
| ENSGALG00010024596 | 0.007365385 | 0.049175167 |
| ENSGALG00010024597 | 0.928996311 | 0.22027782  |
| ENSGALG00010024598 | 0.089692171 | 0.143904485 |
| ENSGALG00010024599 | 0.416876165 | 0.226255574 |
| ENSGALG00010024600 | 0.877643849 | 0.265967241 |
| ENSGALG00010024601 | 0.960488133 | 0.494747036 |
| ENSGALG00010024602 | 0.429345117 | 0.098190018 |
| ENSGALG00010024603 | 0.191834552 | 0.177665559 |
| ENSGALG00010024604 | 0.971567019 | 0.330286684 |
| ENSGALG00010024605 | 0.66195373  | 0.485018175 |
| ENSGALG00010024606 | 0.532144827 | 0.174565258 |
| ENSGALG00010024607 | 0.665930992 | 0.51567616  |
| ENSGALG00010024608 | 0.921061847 | 0.252341354 |
| ENSGALG00010024609 | 0.994674521 | 0.340453068 |
| ENSGALG00010024610 | 0.952910729 | 0.258316971 |
| ENSGALG00010024611 | 0.676477491 | 0.062151194 |
| ENSGALG00010024612 | 0.32996091  | 0.145094988 |
| ENSGALG00010024613 | 0.935681983 | 0.279657978 |
| ENSGALG00010024614 | 0.956793339 | 0.32153939  |



|                    |             |             |
|--------------------|-------------|-------------|
| ENSGALG00010024615 | 0.497507349 | 0.397748813 |
| ENSGALG00010024616 | 0.857521745 | 0.287463623 |
| ENSGALG00010024617 | 0.358098542 | 0.0976513   |
| ENSGALG00010024618 | 0.947805167 | 0.360829149 |
| ENSGALG00010024619 | 0.499142582 | 0.432132385 |
| ENSGALG00010024620 | 0.871351189 | 0.232832656 |
| ENSGALG00010024621 | 0.93894484  | 0.300272524 |
| ENSGALG00010024622 | 0.863174239 | 0.310945371 |
| ENSGALG00010024623 | 0.982863169 | 0.255781617 |
| ENSGALG00010024624 | 0.804492513 | 0.139495945 |
| ENSGALG00010024625 | 0.93958399  | 0.360175124 |
| ENSGALG00010024626 | 0.190754494 | 0.355847884 |
| ENSGALG00010024627 | 0.991776263 | 0.33943188  |
| ENSGALG00010024628 | 0.736741874 | 0.195219022 |
| ENSGALG00010024629 | 0.602919333 | 0.295079302 |
| ENSGALG00010024630 | 0.839213727 | 0.137504255 |
| ENSGALG00010024631 | 0.948232131 | 0.346171508 |
| ENSGALG00010024632 | 0.558439856 | 0.475666593 |
| ENSGALG00010024633 | 0.993575003 | 0.318968455 |
| ENSGALG00010024634 | 0.794257661 | 0.257616995 |
| ENSGALG00010024635 | 0.789209856 | 0.352276847 |
| ENSGALG00010024636 | 0.252096162 | 0.201695579 |
| ENSGALG00010024637 | 0.950715785 | 0.329206622 |
| ENSGALG00010024638 | 0.259427789 | 0.330853963 |
| ENSGALG00010024639 | 0.320095025 | 0.178953894 |
| ENSGALG00010024640 | 0.403564887 | 0.075513854 |
| ENSGALG00010024641 | 0.959156938 | 0.402061857 |
| ENSGALG00010024642 | 0.064747855 | 0.283695507 |
| ENSGALG00010024643 | 0.907834095 | 0.346134967 |
| ENSGALG00010024644 | 0.842142111 | 0.251358244 |
| ENSGALG00010024645 | 0.905131243 | 0.242795197 |
| ENSGALG00010024646 | 0.811570128 | 0.344976885 |
| ENSGALG00010024647 | 0.301969328 | 0.094409867 |
| ENSGALG00010024648 | 0.688005732 | 0.331872662 |
| ENSGALG00010024649 | 0.193469558 | 0.076744911 |
| ENSGALG00010024650 | 0.995876569 | 0.343354452 |
| ENSGALG00010024651 | 0.93058187  | 0.314932678 |
| ENSGALG00010024652 | 0.669656369 | 0.295810794 |
| ENSGALG00010024653 | 0.923822202 | 0.200824506 |
| ENSGALG00010024654 | 0.945748973 | 0.288437262 |
| ENSGALG00010024655 | 0.873449666 | 0.463988549 |
| ENSGALG00010024656 | 0.858805244 | 0.266327593 |
| ENSGALG00010024657 | 0.817821204 | 0.093534496 |
| ENSGALG00010024658 | 0.922522885 | 0.351293118 |
| ENSGALG00010024659 | 0.972960813 | 0.257527856 |
| ENSGALG00010024660 | 0.324830857 | 0.075410556 |
| ENSGALG00010024662 | 0.977804945 | 0.270999346 |
| ENSGALG00010024663 | 0.87715115  | 0.294531875 |
| ENSGALG00010024664 | 0.253629479 | 0.007484988 |
| ENSGALG00010024665 | 0.961836848 | 0.256318622 |
| ENSGALG00010024666 | 0.122944626 | 0.004296002 |
| ENSGALG00010024667 | 0.924510534 | 0.281564285 |
| ENSGALG00010024668 | 0.858896091 | 0.378085121 |
| ENSGALG00010024669 | 0.452233976 | 0.113922075 |
| ENSGALG00010024670 | 0.405203022 | 0.382460151 |
| ENSGALG00010024671 | 0.933363404 | 0.325761949 |

|                    |             |             |
|--------------------|-------------|-------------|
| ENSGALG00010024672 | 0.918739619 | 0.282774592 |
| ENSGALG00010024673 | 0.971999004 | 0.313564488 |
| ENSGALG00010024674 | 0.60152572  | 0.393403705 |
| ENSGALG00010024675 | 0.94556374  | 0.320511142 |
| ENSGALG00010024676 | 0.978929436 | 0.322304902 |
| ENSGALG00010024677 | 0.936347049 | 0.193460062 |
| ENSGALG00010024678 | 0.505240785 | 0.210037772 |
| ENSGALG00010024679 | 0.95950786  | 0.27834512  |
| ENSGALG00010024680 | 0.40243889  | 0.412441434 |
| ENSGALG00010024681 | 0.918886362 | 0.26552176  |
| ENSGALG00010024682 | 0.588431339 | 0.020960522 |
| ENSGALG00010024683 | 0.988910733 | 0.33338333  |
| ENSGALG00010024684 | 0.710948732 | 0.078913808 |
| ENSGALG00010024685 | 0.375245549 | 0.38007076  |
| ENSGALG00010024686 | 0.979936427 | 0.233613041 |
| ENSGALG00010024687 | 0.868854824 | 0.396792595 |
| ENSGALG00010024688 | 0.853770931 | 0.220154128 |
| ENSGALG00010024689 | 0.994961193 | 0.358333155 |
| ENSGALG00010024690 | 0.865333099 | 0.44728367  |
| ENSGALG00010024691 | 0.818939077 | 0.342782001 |
| ENSGALG00010024692 | 0.8756233   | 0.349844053 |
| ENSGALG00010024693 | 0.913679535 | 0.471011141 |
| ENSGALG00010024694 | 0.373674325 | 0.539832752 |
| ENSGALG00010024695 | 0.267595285 | 0.248200624 |
| ENSGALG00010024696 | 0.992147061 | 0.367167732 |
| ENSGALG00010024697 | 0.853673804 | 0.158517556 |
| ENSGALG00010024698 | 0.695616895 | 0.513998324 |
| ENSGALG00010024699 | 0.965856706 | 0.296622501 |
| ENSGALG00010024700 | 0.971760762 | 0.272753701 |
| ENSGALG00010024701 | 0.588976545 | 0.170396878 |
| ENSGALG00010024702 | 0.537084042 | 0.243805645 |
| ENSGALG00010024703 | 0.114513717 | 0.23893036  |
| ENSGALG00010024705 | 0.946529569 | 0.222749881 |
| ENSGALG00010024706 | 0.075951677 | 0.352844518 |
| ENSGALG00010024707 | 0.356640388 | 0.092267518 |
| ENSGALG00010024708 | 0.245809998 | 0.281845415 |
| ENSGALG00010024709 | 0.985285649 | 0.311370123 |
| ENSGALG00010024710 | 0.980739633 | 0.34642565  |
| ENSGALG00010024711 | 0.788115565 | 0.23832183  |
| ENSGALG00010024712 | 0.886064071 | 0.483632916 |
| ENSGALG00010024713 | 0.965787816 | 0.212740799 |
| ENSGALG00010024714 | 0.968763351 | 0.333712563 |
| ENSGALG00010024715 | 0.337012172 | 0.084610335 |
| ENSGALG00010024716 | 0.852127736 | 0.107560521 |
| ENSGALG00010024717 | 0.987632262 | 0.325405337 |
| ENSGALG00010024718 | 0.974090001 | 0.407870468 |
| ENSGALG00010024719 | 0.591793903 | 0.320427475 |
| ENSGALG00010024720 | 0.382885845 | 0.114235036 |
| ENSGALG00010024721 | 0.149520162 | 0.3561471   |
| ENSGALG00010024722 | 0.822271942 | 0.300354992 |
| ENSGALG00010024723 | 0.960549872 | 0.371677262 |
| ENSGALG00010024724 | 0.79101278  | 0.565495187 |
| ENSGALG00010024726 | 0.512523124 | 0.216052958 |
| ENSGALG00010024728 | 0.778539144 | 0.430435878 |
| ENSGALG00010024729 | 0.731000329 | 0.374219058 |
| ENSGALG00010024730 | 0.079697525 | 0.247475839 |

|                    |             |             |
|--------------------|-------------|-------------|
| ENSGALG00010024731 | 0.833607743 | 0.233954597 |
| ENSGALG00010024732 | 0.914484282 | 0.362328684 |
| ENSGALG00010024733 | 0.951300763 | 0.315025833 |
| ENSGALG00010024734 | 0.677431268 | 0.214805839 |
| ENSGALG00010024735 | 0.90448037  | 0.244648514 |
| ENSGALG00010024736 | 0.397407812 | 0.1461189   |
| ENSGALG00010024737 | 0.572619595 | 0.368302797 |
| ENSGALG00010024738 | 0.980023513 | 0.360370743 |
| ENSGALG00010024739 | 0.066270896 | 0.0153241   |
| ENSGALG00010024741 | 0.888479379 | 0.293219564 |
| ENSGALG00010024742 | 0.305859218 | 0.287846736 |
| ENSGALG00010024743 | 0.140036041 | 0.46691462  |
| ENSGALG00010024744 | 0.755821401 | 0.303315899 |
| ENSGALG00010024745 | 0.743585378 | 0.255460116 |
| ENSGALG00010024747 | 0.791089726 | 0.48498188  |
| ENSGALG00010024748 | 0.931822221 | 0.404458081 |
| ENSGALG00010024749 | 0.974759828 | 0.244822196 |
| ENSGALG00010024750 | 0.983944441 | 0.333548212 |
| ENSGALG00010024751 | 0.156734101 | 0.030679904 |
| ENSGALG00010024752 | 0.280061691 | 0.1627956   |
| ENSGALG00010024753 | 0.89207282  | 0.383053964 |
| ENSGALG00010024754 | 0.982573186 | 0.319434912 |
| ENSGALG00010024755 | 0.847804458 | 0.235840228 |
| ENSGALG00010024756 | 0.794067842 | 0.092664177 |
| ENSGALG00010024757 | 0.972582771 | 0.318814594 |
| ENSGALG00010024758 | 0.743165017 | 0.485752857 |
| ENSGALG00010024759 | 0.994732262 | 0.297286764 |
| ENSGALG00010024760 | 0.252743649 | 0.138609265 |
| ENSGALG00010024761 | 0.770575514 | 0.404414092 |
| ENSGALG00010024762 | 0.633477786 | 0.214861527 |
| ENSGALG00010024763 | 0.609384942 | 0.623083179 |
| ENSGALG00010024764 | 0.952790551 | 0.18568364  |
| ENSGALG00010024765 | 0.977634444 | 0.30096179  |
| ENSGALG00010024766 | 0.388582483 | 0.339106569 |
| ENSGALG00010024767 | 0.93800205  | 0.387383449 |
| ENSGALG00010024768 | 0.812789139 | 0.436819204 |
| ENSGALG00010024769 | 0.98919052  | 0.328059362 |
| ENSGALG00010024770 | 0.988286618 | 0.320761892 |
| ENSGALG00010024771 | 0.922581862 | 0.24932104  |
| ENSGALG00010024772 | 0.508846919 | 0.38673315  |
| ENSGALG00010024773 | 0.972806604 | 0.326609324 |
| ENSGALG00010024775 | 0.319535121 | 0.299641561 |
| ENSGALG00010024776 | 0.537575252 | 0.495017876 |
| ENSGALG00010024777 | 0.682012421 | 0.208543461 |
| ENSGALG00010024778 | 0.965899643 | 0.350670658 |
| ENSGALG00010024779 | 0.041009301 | 0.044772762 |
| ENSGALG00010024781 | 0.883499015 | 0.176086165 |
| ENSGALG00010024783 | 0.182804957 | 0.281769643 |
| ENSGALG00010024784 | 0.249440845 | 0.172568822 |
| ENSGALG00010024785 | 0.839772061 | 0.369647034 |
| ENSGALG00010024786 | 0.988742133 | 0.340508498 |
| ENSGALG00010024787 | 0.829531142 | 0.355695101 |
| ENSGALG00010024788 | 0.942684556 | 0.312312632 |
| ENSGALG00010024789 | 0.934506564 | 0.266301166 |
| ENSGALG00010024791 | 0.972800951 | 0.263326447 |
| ENSGALG00010024792 | 0.861637784 | 0.432620394 |

|                    |             |             |
|--------------------|-------------|-------------|
| ENSGALG00010024793 | 0.822197428 | 0.408123314 |
| ENSGALG00010024794 | 0.720073806 | 0.275653957 |
| ENSGALG00010024795 | 0.957314281 | 0.196228815 |
| ENSGALG00010024796 | 0.186582289 | 0.445156674 |
| ENSGALG00010024797 | 0.980817577 | 0.316852726 |
| ENSGALG00010024798 | 0.564732697 | 0.00178397  |
| ENSGALG00010024799 | 0.161420921 | 0.134754424 |
| ENSGALG00010024800 | 0.567229998 | 0.070357518 |
| ENSGALG00010024801 | 0.365076351 | 0.244094112 |
| ENSGALG00010024802 | 0.236934387 | 0.240578385 |
| ENSGALG00010024803 | 0.82642178  | 0.408570029 |
| ENSGALG00010024804 | 0.927019301 | 0.385075678 |
| ENSGALG00010024805 | 0.909778703 | 0.251532241 |
| ENSGALG00010024806 | 0.538492845 | 0.119257342 |
| ENSGALG00010024807 | 0.935446183 | 0.350853368 |
| ENSGALG00010024808 | 0.798470656 | 0.314803141 |
| ENSGALG00010024809 | 0.64282685  | 0.078889244 |
| ENSGALG00010024810 | 0.977005661 | 0.362638273 |
| ENSGALG00010024811 | 0.943688558 | 0.207991316 |
| ENSGALG00010024812 | 0.185427325 | 0.19785289  |
| ENSGALG00010024813 | 0.475125876 | 0.004425468 |
| ENSGALG00010024814 | 0.272451366 | 0.364131713 |
| ENSGALG00010024816 | 0.414775335 | 0.149645142 |
| ENSGALG00010024817 | 0.968022918 | 0.382848071 |
| ENSGALG00010024818 | 0.713520704 | 0.26760434  |
| ENSGALG00010024820 | 0.696377772 | 0.27145458  |
| ENSGALG00010024821 | 0.953356635 | 0.361282307 |
| ENSGALG00010024822 | 0.939143804 | 0.300262636 |
| ENSGALG00010024823 | 0.992698609 | 0.314684921 |
| ENSGALG00010024824 | 0.229997225 | 0.050584848 |
| ENSGALG00010024825 | 0.961179963 | 0.295138342 |
| ENSGALG00010024826 | 0.71187845  | 0.262733942 |
| ENSGALG00010024827 | 0.231665585 | 0.14295467  |
| ENSGALG00010024828 | 0.739913083 | 0.322589287 |
| ENSGALG00010024829 | 0.975193578 | 0.330554744 |
| ENSGALG00010024830 | 0.619593331 | 0.178983235 |
| ENSGALG00010024831 | 0.310232863 | 0.094339566 |
| ENSGALG00010024833 | 0.990494436 | 0.345302743 |
| ENSGALG00010024834 | 0.907417583 | 0.235733588 |
| ENSGALG00010024835 | 0.771756901 | 0.16030583  |
| ENSGALG00010024836 | 0.961170492 | 0.277032015 |
| ENSGALG00010024837 | 0.962932737 | 0.232984537 |
| ENSGALG00010024839 | 0.924405583 | 0.24746687  |
| ENSGALG00010024840 | 0.446884218 | 0.130034947 |
| ENSGALG00010024841 | 0.620222601 | 0.202023861 |
| ENSGALG00010024842 | 0.915583648 | 0.258067654 |
| ENSGALG00010024843 | 0.945933115 | 0.298426284 |
| ENSGALG00010024844 | 0.673395279 | 0.702571801 |
| ENSGALG00010024845 | 0.956839761 | 0.324100564 |
| ENSGALG00010024846 | 0.952399951 | 0.131585431 |
| ENSGALG00010024847 | 0.923538253 | 0.270936733 |
| ENSGALG00010024848 | 0.926520626 | 0.328967713 |
| ENSGALG00010024849 | 0.297608073 | 0.300759368 |
| ENSGALG00010024850 | 0.969623896 | 0.30272169  |
| ENSGALG00010024851 | 0.272141256 | 0.21228556  |
| ENSGALG00010024852 | 0.747463451 | 0.2196531   |

|                    |             |             |
|--------------------|-------------|-------------|
| ENSGALG00010024853 | 0.831640384 | 0.243044304 |
| ENSGALG00010024854 | 0.944639246 | 0.304406816 |
| ENSGALG00010024855 | 0.953883958 | 0.248276655 |
| ENSGALG00010024856 | 0.968357344 | 0.370491506 |
| ENSGALG00010024857 | 0.829996854 | 0.337821529 |
| ENSGALG00010024858 | 0.788094636 | 0.218046758 |
| ENSGALG00010024859 | 0.937662456 | 0.291733394 |
| ENSGALG00010024860 | 0.240438453 | 0.047706487 |
| ENSGALG00010024861 | 0.820703279 | 0.273809835 |
| ENSGALG00010024862 | 0.97926546  | 0.238989574 |
| ENSGALG00010024863 | 0.247650251 | 0.143702356 |
| ENSGALG00010024864 | 0.655501463 | 0.358957709 |
| ENSGALG00010024865 | 0.487194845 | 0.226895153 |
| ENSGALG00010024866 | 0.919870403 | 0.329331489 |
| ENSGALG00010024867 | 0.501763497 | 0.062230736 |
| ENSGALG00010024868 | 0.948410996 | 0.297228534 |
| ENSGALG00010024869 | 0.960432753 | 0.348354755 |
| ENSGALG00010024870 | 0.968352748 | 0.277729042 |
| ENSGALG00010024871 | 0.719931425 | 0.098343627 |
| ENSGALG00010024872 | 0.480064631 | 0.223011743 |
| ENSGALG00010024873 | 0.947364425 | 0.299710479 |
| ENSGALG00010024874 | 0.984878347 | 0.306054417 |
| ENSGALG00010024875 | 0.670306739 | 0.21391956  |
| ENSGALG00010024876 | 0.96646384  | 0.379907292 |
| ENSGALG00010024877 | 0.828634354 | 0.066060048 |
| ENSGALG00010024878 | 0.977359631 | 0.279656718 |
| ENSGALG00010024879 | 0.430033034 | 0.07689666  |
| ENSGALG00010024880 | 0.116438289 | 0.032494398 |
| ENSGALG00010024881 | 0.497697539 | 0.125367511 |
| ENSGALG00010024882 | 0.733636158 | 0.115083961 |
| ENSGALG00010024883 | 0.829610613 | 0.215670537 |
| ENSGALG00010024884 | 0.952741772 | 0.306601657 |
| ENSGALG00010024885 | 0.12813337  | 0.142822932 |
| ENSGALG00010024886 | 0.925932856 | 0.312321543 |
| ENSGALG00010024887 | 0.969866016 | 0.247911804 |
| ENSGALG00010024888 | 0.884747929 | 0.230116724 |
| ENSGALG00010024889 | 0.921326726 | 0.244451252 |
| ENSGALG00010024890 | 0.937277227 | 0.354286179 |
| ENSGALG00010024891 | 0.948931383 | 0.210993427 |
| ENSGALG00010024892 | 0.581145035 | 0.301720316 |
| ENSGALG00010024893 | 0.553561688 | 0.188699465 |
| ENSGALG00010024894 | 0.96044577  | 0.348539935 |
| ENSGALG00010024895 | 0.340363993 | 0.260480035 |
| ENSGALG00010024896 | 0.98659107  | 0.321933022 |
| ENSGALG00010024897 | 0.971655449 | 0.363961461 |
| ENSGALG00010024898 | 0.944942546 | 0.34076401  |
| ENSGALG00010024899 | 0.916436179 | 0.338206309 |
| ENSGALG00010024900 | 0.80972239  | 0.403953044 |
| ENSGALG00010024901 | 0.805335911 | 0.163057856 |
| ENSGALG00010024902 | 0.885162121 | 0.278813442 |
| ENSGALG00010024903 | 0.945916226 | 0.339914505 |
| ENSGALG00010024904 | 0.944918904 | 0.291626145 |
| ENSGALG00010024905 | 0.76164317  | 0.462641058 |
| ENSGALG00010024907 | 0.965831071 | 0.268838175 |
| ENSGALG00010024908 | 0.979730628 | 0.292088652 |
| ENSGALG00010024909 | 0.988935131 | 0.321132266 |

|                    |             |             |
|--------------------|-------------|-------------|
| ENSGALG00010024910 | 0.971762965 | 0.392089788 |
| ENSGALG00010024911 | 0.956221037 | 0.328915234 |
| ENSGALG00010024913 | 0.158051691 | 0.208262414 |
| ENSGALG00010024914 | 0.241821292 | 0.324550082 |
| ENSGALG00010024915 | 0.869728045 | 0.12166943  |
| ENSGALG00010024917 | 0.107953177 | 0.026242807 |
| ENSGALG00010024918 | 0.911814058 | 0.23070267  |
| ENSGALG00010024919 | 0.747851888 | 0.159434361 |
| ENSGALG00010024920 | 0.981364775 | 0.286529719 |
| ENSGALG00010024921 | 0.761297445 | 0.442330444 |
| ENSGALG00010024922 | 0.81250693  | 0.282300494 |
| ENSGALG00010024924 | 0.322642809 | 0.120881016 |
| ENSGALG00010024925 | 0.91235628  | 0.235775612 |
| ENSGALG00010024926 | 0.018778296 | 0.060692393 |
| ENSGALG00010024927 | 0.480317847 | 0.017805989 |
| ENSGALG00010024928 | 0.95657031  | 0.273968721 |
| ENSGALG00010024929 | 0.975939025 | 0.301107415 |
| ENSGALG00010024930 | 0.873512706 | 0.214624059 |
| ENSGALG00010024931 | 0.042418018 | 0.112480393 |
| ENSGALG00010024933 | 0.989264147 | 0.319634053 |
| ENSGALG00010024934 | 0.988453997 | 0.347088676 |
| ENSGALG00010024935 | 0.987974622 | 0.305156664 |
| ENSGALG00010024936 | 0.766488883 | 0.146884804 |
| ENSGALG00010024937 | 0.203077011 | 0.083059123 |
| ENSGALG00010024938 | 0.704159287 | 0.395939705 |
| ENSGALG00010024939 | 0.950219708 | 0.418434161 |
| ENSGALG00010024940 | 0.893938395 | 0.347346704 |
| ENSGALG00010024941 | 0.908935449 | 0.195594173 |
| ENSGALG00010024942 | 0.446864709 | 0.223963771 |
| ENSGALG00010024943 | 0.947189166 | 0.315988817 |
| ENSGALG00010024944 | 0.164765055 | 0.16438162  |
| ENSGALG00010024945 | 0.261261723 | 0.134821708 |
| ENSGALG00010024946 | 0.359521837 | 0.193677693 |
| ENSGALG00010024947 | 0.896512193 | 0.311733395 |
| ENSGALG00010024948 | 0.980629202 | 0.304710522 |
| ENSGALG00010024949 | 0.657814105 | 0.046957714 |
| ENSGALG00010024950 | 0.969969024 | 0.365484631 |
| ENSGALG00010024951 | 0.189240572 | 0.04996112  |
| ENSGALG00010024952 | 0.00196969  | 0.072516884 |
| ENSGALG00010024953 | 0.614958015 | 0.002177562 |
| ENSGALG00010024954 | 0.081528906 | 0.092545242 |
| ENSGALG00010024955 | 0.026966462 | 0.158284821 |
| ENSGALG00010024956 | 0.230041278 | 0.202353941 |
| ENSGALG00010024958 | 0.28880012  | 0.418789177 |
| ENSGALG00010024959 | 0.995015266 | 0.338041235 |
| ENSGALG00010024960 | 0.887442078 | 0.649127297 |
| ENSGALG00010024961 | 0.984829417 | 0.315108334 |
| ENSGALG00010024962 | 0.994923944 | 0.339038493 |
| ENSGALG00010024963 | 0.702496018 | 0.193369339 |
| ENSGALG00010024964 | 0.164507058 | 0.357627441 |
| ENSGALG00010024965 | 0.645546274 | 0.301340509 |
| ENSGALG00010024966 | 0.59657963  | 0.144958332 |
| ENSGALG00010024967 | 0.307395467 | 0.506952586 |
| ENSGALG00010024968 | 0.904123013 | 0.328560984 |
| ENSGALG00010024969 | 0.161250365 | 0.239164779 |
| ENSGALG00010024970 | 0.922646512 | 0.216277339 |

|                    |             |             |
|--------------------|-------------|-------------|
| ENSGALG00010024971 | 0.364596763 | 0.264660927 |
| ENSGALG00010024973 | 0.591131714 | 0.336231502 |
| ENSGALG00010024974 | 0.933942759 | 0.264401557 |
| ENSGALG00010024975 | 0.948055091 | 0.333549656 |
| ENSGALG00010024976 | 0.161898872 | 0.170558899 |
| ENSGALG00010024977 | 0.944580095 | 0.233679633 |
| ENSGALG00010024978 | 0.639323424 | 0.286491768 |
| ENSGALG00010024979 | 0.203991683 | 0.058221925 |
| ENSGALG00010024980 | 0.431645979 | 0.199150541 |
| ENSGALG00010024982 | 0.410227587 | 0.202927549 |
| ENSGALG00010024983 | 0.963816852 | 0.36580031  |
| ENSGALG00010024984 | 0.37375514  | 0.063525011 |
| ENSGALG00010024985 | 0.450053866 | 0.189032749 |
| ENSGALG00010024986 | 0.941085989 | 0.416508571 |
| ENSGALG00010024987 | 0.021004637 | 0.090375244 |
| ENSGALG00010024988 | 0.198172997 | 0.262926778 |
| ENSGALG00010024989 | 0.213951738 | 0.050693271 |
| ENSGALG00010024990 | 0.62934714  | 0.328551814 |
| ENSGALG00010024991 | 0.40834889  | 0.0940038   |
| ENSGALG00010024992 | 0.298140893 | 0.421788492 |
| ENSGALG00010024993 | 0.693152292 | 0.192497857 |
| ENSGALG00010024994 | 0.965084281 | 0.328806081 |
| ENSGALG00010024996 | 0.597491619 | 0.285401279 |
| ENSGALG00010024997 | 0.24841393  | 0.254540292 |
| ENSGALG00010024999 | 0.508758851 | 0.37888574  |
| ENSGALG00010025000 | 0.33135134  | 0.153585636 |
| ENSGALG00010025003 | 0.981628141 | 0.326772285 |
| ENSGALG00010025004 | 0.157068597 | 0.037983046 |
| ENSGALG00010025005 | 0.983872808 | 0.27750662  |
| ENSGALG00010025007 | 0.940619419 | 0.302355111 |
| ENSGALG00010025008 | 0.340235079 | 0.376875117 |
| ENSGALG00010025010 | 0.951881189 | 0.285224722 |
| ENSGALG00010025011 | 0.639147631 | 0.103407227 |
| ENSGALG00010025012 | 0.488132209 | 0.641674675 |
| ENSGALG00010025013 | 0.388360885 | 0.148933175 |
| ENSGALG00010025015 | 0.414596716 | 0.066174972 |
| ENSGALG00010025016 | 0.203991683 | 0.058221925 |
| ENSGALG00010025018 | 0.364695497 | 0.432034705 |
| ENSGALG00010025019 | 0.008533611 | 0.190617541 |
| ENSGALG00010025020 | 0.089260919 | 0.269988056 |
| ENSGALG00010025023 | 0.029758472 | 0.139135504 |
| ENSGALG00010025024 | 0.802140703 | 0.136080927 |
| ENSGALG00010025025 | 0.925025105 | 0.235413326 |
| ENSGALG00010025026 | 0.95496316  | 0.362289263 |
| ENSGALG00010025027 | 0.247162476 | 0.191578568 |
| ENSGALG00010025028 | 0.94487128  | 0.410704628 |
| ENSGALG00010025029 | 0.527460055 | 0.145518388 |
| ENSGALG00010025030 | 0.620444896 | 0.325136552 |
| ENSGALG00010025031 | 0.120618136 | 0.020476545 |
| ENSGALG00010025032 | 0.8992302   | 0.421246412 |
| ENSGALG00010025033 | 0.034060073 | 0.094660884 |
| ENSGALG00010025034 | 0.119676382 | 0.177148554 |
| ENSGALG00010025035 | 0.615121791 | 0.045816259 |
| ENSGALG00010025036 | 0.176235095 | 0.78804764  |
| ENSGALG00010025038 | 0.118115358 | 0.146883891 |
| ENSGALG00010025039 | 0.979799472 | 0.274834712 |

|                    |             |             |
|--------------------|-------------|-------------|
| ENSGALG00010025040 | 0.277566769 | 0.107857127 |
| ENSGALG00010025041 | 0.115998335 | 0.068879627 |
| ENSGALG00010025042 | 0.326352227 | 0.296872118 |
| ENSGALG00010025043 | 0.830988298 | 0.122219019 |
| ENSGALG00010025044 | 0.912876958 | 0.306891478 |
| ENSGALG00010025045 | 0.93826793  | 0.301966349 |
| ENSGALG00010025046 | 0.433139787 | 0.147713633 |
| ENSGALG00010025047 | 0.346219757 | 0.266064828 |
| ENSGALG00010025048 | 0.938999529 | 0.283475907 |
| ENSGALG00010025050 | 0.01215542  | 0.094021119 |
| ENSGALG00010025052 | 0.661313483 | 0.309061303 |
| ENSGALG00010025054 | 0.351426963 | 0.019018966 |
| ENSGALG00010025055 | 0.248496247 | 0.324614358 |
| ENSGALG00010025056 | 0.798591824 | 0.294145386 |
| ENSGALG00010025057 | 0.979371872 | 0.34156393  |
| ENSGALG00010025058 | 0.62644523  | 0.055146778 |
| ENSGALG00010025059 | 0.578875156 | 0.14867564  |
| ENSGALG00010025060 | 0.384010335 | 0.305953376 |
| ENSGALG00010025061 | 0.70849635  | 0.082078832 |
| ENSGALG00010025063 | 0.808911008 | 0.285985632 |
| ENSGALG00010025064 | 0.911871495 | 0.151148203 |
| ENSGALG00010025065 | 0.410409955 | 0.23872141  |
| ENSGALG00010025067 | 0.542424544 | 0.11274235  |
| ENSGALG00010025069 | 0.895045434 | 0.363095152 |
| ENSGALG00010025070 | 0.182570305 | 0.205924811 |
| ENSGALG00010025071 | 0.812258376 | 0.394471426 |
| ENSGALG00010025072 | 0.053133577 | 0.172599439 |
| ENSGALG00010025073 | 0.726911459 | 0.241471036 |
| ENSGALG00010025075 | 0.131284031 | 0.26489006  |
| ENSGALG00010025076 | 0.211936166 | 0.274867062 |
| ENSGALG00010025077 | 0.541459165 | 0.191502374 |
| ENSGALG00010025078 | 0.785287896 | 0.46197732  |
| ENSGALG00010025080 | 0.054305167 | 0.153573709 |
| ENSGALG00010025085 | 0.375287285 | 0.114121296 |
| ENSGALG00010025088 | 0.950494352 | 0.271744153 |
| ENSGALG00010025089 | 0.430823118 | 0.12415925  |
| ENSGALG00010025090 | 0.903266014 | 0.322486282 |
| ENSGALG00010025091 | 0.5413914   | 0.215142031 |
| ENSGALG00010025092 | 0.956935833 | 0.393448326 |
| ENSGALG00010025093 | 0.00107637  | 0.201850013 |
| ENSGALG00010025097 | 0.765789609 | 0.465072622 |
| ENSGALG00010025098 | 0.747650063 | 0.305883581 |
| ENSGALG00010025100 | 0.285179533 | 0.121954912 |
| ENSGALG00010025102 | 0.932467293 | 0.391824454 |
| ENSGALG00010025103 | 0.969523006 | 0.325377343 |
| ENSGALG00010025105 | 0.295478522 | 0.152427427 |
| ENSGALG00010025106 | 0.285272007 | 0.109169955 |
| ENSGALG00010025108 | 0.938067483 | 0.326012235 |
| ENSGALG00010025109 | 0.54967768  | 0.131646634 |
| ENSGALG00010025110 | 0.208550923 | 0.676301294 |
| ENSGALG00010025111 | 0.641662661 | 0.017630084 |
| ENSGALG00010025113 | 0.816683242 | 0.229932364 |
| ENSGALG00010025114 | 0.103296136 | 0.261817969 |
| ENSGALG00010025115 | 0.141045986 | 0.011990063 |
| ENSGALG00010025116 | 0.463628627 | 0.19876714  |
| ENSGALG00010025117 | 0.824464571 | 0.363758749 |



|                    |             |             |
|--------------------|-------------|-------------|
| ENSGALG00010025118 | 0.934166572 | 0.320295984 |
| ENSGALG00010025119 | 0.308917405 | 0.210985547 |
| ENSGALG00010025120 | 0.331509393 | 0.156730178 |
| ENSGALG00010025121 | 0.531125511 | 0.005969025 |
| ENSGALG00010025122 | 0.700242725 | 0.016395606 |
| ENSGALG00010025125 | 0.939128589 | 0.228113341 |
| ENSGALG00010025126 | 0.659342023 | 0.341351428 |
| ENSGALG00010025127 | 0.558844302 | 0.350774258 |
| ENSGALG00010025128 | 0.895231675 | 0.434100082 |
| ENSGALG00010025129 | 0.784615346 | 0.461155679 |
| ENSGALG00010025130 | 0.974523983 | 0.292311316 |
| ENSGALG00010025131 | 0.408562239 | 0.236752053 |
| ENSGALG00010025132 | 0.579389511 | 0.240277667 |
| ENSGALG00010025133 | 0.626019989 | 0.195207285 |
| ENSGALG00010025134 | 0.272241446 | 0.007471202 |
| ENSGALG00010025136 | 0.254123497 | 0.181359519 |
| ENSGALG00010025137 | 0.932110606 | 0.266105055 |
| ENSGALG00010025138 | 0.643105708 | 0.008526398 |
| ENSGALG00010025139 | 0.832618008 | 0.288275315 |
| ENSGALG00010025140 | 0.597389611 | 0.224516766 |
| ENSGALG00010025142 | 0.285272007 | 0.109169955 |
| ENSGALG00010025144 | 0.233067903 | 0.095485992 |
| ENSGALG00010025145 | 0.960478612 | 0.333930477 |
| ENSGALG00010025146 | 0.549080842 | 0.002696549 |
| ENSGALG00010025147 | 0.955097153 | 0.248241975 |
| ENSGALG00010025148 | 0.22849409  | 0.039128681 |
| ENSGALG00010025149 | 0.825674228 | 0.182073809 |
| ENSGALG00010025151 | 0.369239878 | 0.007910514 |
| ENSGALG00010025152 | 0.471110355 | 0.206108819 |
| ENSGALG00010025154 | 0.909990022 | 0.324203814 |
| ENSGALG00010025155 | 0.074070766 | 0.02191982  |
| ENSGALG00010025156 | 0.142338824 | 0.01527242  |
| ENSGALG00010025157 | 0.104816559 | 0.250895583 |
| ENSGALG00010025158 | 0.400051822 | 0.226634549 |
| ENSGALG00010025159 | 0.759379287 | 0.423081251 |
| ENSGALG00010025160 | 0.896173353 | 0.130742478 |
| ENSGALG00010025161 | 0.037103126 | 0.135840299 |
| ENSGALG00010025162 | 0.124832317 | 0.132770016 |
| ENSGALG00010025163 | 0.606458025 | 0.132483332 |
| ENSGALG00010025164 | 0.820732978 | 0.252215337 |
| ENSGALG00010025166 | 0.918680192 | 0.31724359  |
| ENSGALG00010025167 | 0.688895072 | 0.068926328 |
| ENSGALG00010025168 | 0.944505233 | 0.31879072  |
| ENSGALG00010025169 | 0.352155798 | 0.161261905 |
| ENSGALG00010025170 | 0.85161083  | 0.233044273 |
| ENSGALG00010025171 | 0.447623677 | 0.1674086   |
| ENSGALG00010025172 | 0.959909368 | 0.295464817 |
| ENSGALG00010025173 | 0.474105198 | 0.267803845 |
| ENSGALG00010025175 | 0.401669771 | 0.597749459 |
| ENSGALG00010025176 | 0.856529302 | 0.277006138 |
| ENSGALG00010025177 | 0.669511942 | 0.221787745 |
| ENSGALG00010025178 | 0.596143543 | 0.056801663 |
| ENSGALG00010025180 | 0.78384213  | 0.279262144 |
| ENSGALG00010025181 | 0.264239718 | 0.073427965 |
| ENSGALG00010025182 | 0.97214018  | 0.346721858 |
| ENSGALG00010025186 | 0.722966722 | 0.158872402 |

|                    |             |             |
|--------------------|-------------|-------------|
| ENSGALG00010025188 | 0.354188534 | 0.215413583 |
| ENSGALG00010025189 | 0.615786921 | 0.117129476 |
| ENSGALG00010025190 | 0.471309782 | 0.112372609 |
| ENSGALG00010025191 | 0.166328932 | 0.250056524 |
| ENSGALG00010025192 | 0.991233129 | 0.301767186 |
| ENSGALG00010025193 | 0.671616678 | 0.459454274 |
| ENSGALG00010025194 | 0.8662221   | 0.326823702 |
| ENSGALG00010025195 | 0.93789494  | 0.411431514 |
| ENSGALG00010025196 | 0.364675373 | 0.164356268 |
| ENSGALG00010025198 | 0.551892743 | 0.134270135 |
| ENSGALG00010025200 | 0.95041453  | 0.266028623 |
| ENSGALG00010025201 | 0.270451009 | 0.090541667 |
| ENSGALG00010025202 | 0.501750882 | 0.3280941   |
| ENSGALG00010025204 | 0.637801164 | 0.465215962 |
| ENSGALG00010025205 | 0.647023284 | 0.258725278 |
| ENSGALG00010025206 | 0.319058215 | 0.168300175 |
| ENSGALG00010025207 | 0.237498436 | 0.030269156 |
| ENSGALG00010025208 | 0.65783448  | 0.190847689 |
| ENSGALG00010025210 | 0.989476258 | 0.355972296 |
| ENSGALG00010025211 | 0.647840576 | 0.195802818 |
| ENSGALG00010025212 | 0.993811848 | 0.309227452 |
| ENSGALG00010025213 | 0.027851816 | 0.14441112  |
| ENSGALG00010025214 | 0.183557842 | 0.371817764 |
| ENSGALG00010025215 | 0.993649079 | 0.323473086 |
| ENSGALG00010025216 | 0.556862908 | 0.093918925 |
| ENSGALG00010025217 | 0.380163374 | 0.082113198 |
| ENSGALG00010025219 | 0.889999176 | 0.245707738 |
| ENSGALG00010025220 | 0.044657074 | 0.54792616  |
| ENSGALG00010025221 | 0.795839835 | 0.300271208 |
| ENSGALG00010025222 | 0.959949614 | 0.2180522   |
| ENSGALG00010025223 | 0.551605364 | 0.041865855 |
| ENSGALG00010025224 | 0.789574558 | 0.310622715 |
| ENSGALG00010025225 | 0.518638566 | 0.174634352 |
| ENSGALG00010025226 | 0.218298356 | 0.216007457 |
| ENSGALG00010025227 | 0.467901446 | 0.112482642 |
| ENSGALG00010025228 | 0.665067107 | 0.128825674 |
| ENSGALG00010025229 | 0.982450788 | 0.349181593 |
| ENSGALG00010025230 | 0.74189509  | 0.258274872 |
| ENSGALG00010025232 | 0.41723425  | 0.2668753   |
| ENSGALG00010025233 | 0.902242025 | 0.181394855 |
| ENSGALG00010025234 | 0.270451009 | 0.090541667 |
| ENSGALG00010025236 | 0.97974652  | 0.294786813 |
| ENSGALG00010025238 | 0.47205787  | 0.694646782 |
| ENSGALG00010025239 | 0.74962802  | 0.219755167 |
| ENSGALG00010025240 | 0.914811573 | 0.325707678 |
| ENSGALG00010025241 | 0.299725404 | 0.140818236 |
| ENSGALG00010025242 | 0.625556967 | 0.343361878 |
| ENSGALG00010025243 | 0.882480937 | 0.246714122 |
| ENSGALG00010025244 | 0.672149796 | 0.131484466 |
| ENSGALG00010025245 | 0.098584232 | 0.127285755 |
| ENSGALG00010025246 | 0.940744194 | 0.292236445 |
| ENSGALG00010025247 | 0.989405612 | 0.335493533 |
| ENSGALG00010025248 | 0.512295115 | 0.141251594 |
| ENSGALG00010025249 | 0.160368076 | 0.256392964 |
| ENSGALG00010025250 | 0.795273823 | 0.320125807 |
| ENSGALG00010025251 | 0.21622191  | 0.257890352 |

|                    |             |             |
|--------------------|-------------|-------------|
| ENSGALG00010025252 | 0.812585581 | 0.289956575 |
| ENSGALG00010025253 | 0.874494789 | 0.185348702 |
| ENSGALG00010025254 | 0.879640834 | 0.236524394 |
| ENSGALG00010025255 | 0.970065039 | 0.300964339 |
| ENSGALG00010025256 | 0.951438529 | 0.413603063 |
| ENSGALG00010025257 | 0.753943234 | 0.31963332  |
| ENSGALG00010025259 | 0.992394328 | 0.33356428  |
| ENSGALG00010025260 | 0.065701053 | 0.184318944 |
| ENSGALG00010025261 | 0.97841525  | 0.313281573 |
| ENSGALG00010025262 | 0.792647849 | 0.272754367 |
| ENSGALG00010025263 | 0.473451822 | 0.152307208 |
| ENSGALG00010025266 | 0.990885372 | 0.373883686 |
| ENSGALG00010025268 | 0.964121887 | 0.316462046 |
| ENSGALG00010025270 | 0.956290562 | 0.309866791 |
| ENSGALG00010025271 | 0.963745588 | 0.236777809 |
| ENSGALG00010025272 | 0.546141018 | 0.083648566 |
| ENSGALG00010025273 | 0.008113557 | 0.327426402 |
| ENSGALG00010025274 | 0.942303971 | 0.295965261 |
| ENSGALG00010025275 | 0.704219923 | 0.351388808 |
| ENSGALG00010025276 | 0.635984177 | 0.043152307 |
| ENSGALG00010025280 | 0.873569545 | 0.28172635  |
| ENSGALG00010025281 | 0.29282415  | 0.184357635 |
| ENSGALG00010025283 | 0.69768656  | 0.307521007 |
| ENSGALG00010025284 | 0.045431216 | 0.019593835 |
| ENSGALG00010025286 | 0.859584068 | 0.36952422  |
| ENSGALG00010025287 | 0.385953062 | 0.133261917 |
| ENSGALG00010025289 | 0.38481335  | 0.130001139 |
| ENSGALG00010025291 | 0.44177723  | 0.367243954 |
| ENSGALG00010025292 | 0.360268197 | 0.15773279  |
| ENSGALG00010025297 | 0.920334944 | 0.278100938 |
| ENSGALG00010025298 | 0.595166151 | 0.344886275 |
| ENSGALG00010025300 | 0.670803337 | 0.290629249 |
| ENSGALG00010025301 | 0.556914319 | 0.210195898 |
| ENSGALG00010025303 | 0.745167477 | 0.124965585 |
| ENSGALG00010025304 | 0.276354659 | 0.052375499 |
| ENSGALG00010025305 | 0.903619199 | 0.488417181 |
| ENSGALG00010025307 | 0.274586994 | 0.115798603 |
| ENSGALG00010025309 | 0.934435794 | 0.35073784  |
| ENSGALG00010025310 | 0.074228737 | 0.048703972 |
| ENSGALG00010025311 | 0.120203364 | 0.135084415 |
| ENSGALG00010025312 | 0.574689654 | 0.177440138 |
| ENSGALG00010025313 | 0.970916728 | 0.287194656 |
| ENSGALG00010025314 | 0.673287914 | 0.227064033 |
| ENSGALG00010025315 | 0.981615677 | 0.370853916 |
| ENSGALG00010025316 | 0.611904758 | 0.135748472 |
| ENSGALG00010025317 | 0.37996605  | 0.103859099 |
| ENSGALG00010025318 | 0.984193275 | 0.272541197 |
| ENSGALG00010025319 | 0.703076018 | 0.217290375 |
| ENSGALG00010025320 | 0.776014145 | 0.46019344  |
| ENSGALG00010025322 | 0.757655916 | 0.241119181 |
| ENSGALG00010025323 | 0.650415252 | 0.204626726 |
| ENSGALG00010025324 | 0.975854273 | 0.324537646 |
| ENSGALG00010025325 | 0.944399835 | 0.388215369 |
| ENSGALG00010025327 | 0.792618975 | 0.263681095 |
| ENSGALG00010025328 | 0.953983277 | 0.315460468 |
| ENSGALG00010025329 | 0.645339514 | 0.25572833  |

|                    |             |             |
|--------------------|-------------|-------------|
| ENSGALG00010025330 | 0.86668232  | 0.393750576 |
| ENSGALG00010025331 | 0.87986544  | 0.224121239 |
| ENSGALG00010025332 | 0.952705566 | 0.368248131 |
| ENSGALG00010025333 | 0.437589781 | 0.265262432 |
| ENSGALG00010025334 | 0.948958203 | 0.245787567 |
| ENSGALG00010025335 | 0.954035957 | 0.348400155 |
| ENSGALG00010025336 | 0.978605995 | 0.273342137 |
| ENSGALG00010025337 | 0.780901265 | 0.072765555 |
| ENSGALG00010025338 | 0.968786882 | 0.30217612  |
| ENSGALG00010025339 | 0.981047547 | 0.344380355 |
| ENSGALG00010025340 | 0.923177163 | 0.37284125  |
| ENSGALG00010025341 | 0.557110473 | 0.143427403 |
| ENSGALG00010025342 | 0.517851161 | 0.478907429 |
| ENSGALG00010025343 | 0.846021729 | 0.493259074 |
| ENSGALG00010025344 | 0.061990633 | 0.252050695 |
| ENSGALG00010025345 | 0.6634547   | 0.098312917 |
| ENSGALG00010025346 | 0.941358868 | 0.272589523 |
| ENSGALG00010025348 | 0.872118364 | 0.329838158 |
| ENSGALG00010025349 | 0.576452708 | 0.495827681 |
| ENSGALG00010025350 | 0.051108153 | 0.173546243 |
| ENSGALG00010025351 | 0.403734227 | 0.119578312 |
| ENSGALG00010025353 | 0.976381968 | 0.30452238  |
| ENSGALG00010025354 | 0.547453926 | 0.183060818 |
| ENSGALG00010025355 | 0.955509993 | 0.321520269 |
| ENSGALG00010025357 | 0.975248257 | 0.379708422 |
| ENSGALG00010025358 | 0.667016845 | 0.192260114 |
| ENSGALG00010025359 | 0.691700599 | 0.522972987 |
| ENSGALG00010025360 | 0.975293694 | 0.343293374 |
| ENSGALG00010025362 | 0.760785941 | 0.367243656 |
| ENSGALG00010025363 | 0.266137114 | 0.107784983 |
| ENSGALG00010025364 | 0.857013316 | 0.032855833 |
| ENSGALG00010025365 | 0.978178677 | 0.288966315 |
| ENSGALG00010025367 | 0.486762748 | 0.190685035 |
| ENSGALG00010025368 | 0.939993908 | 0.226998859 |
| ENSGALG00010025369 | 0.985561645 | 0.388968158 |
| ENSGALG00010025370 | 0.986129337 | 0.318856667 |
| ENSGALG00010025371 | 0.860262924 | 0.280818089 |
| ENSGALG00010025373 | 0.715413808 | 0.136059729 |
| ENSGALG00010025374 | 0.309297036 | 0.020926432 |
| ENSGALG00010025376 | 0.590635679 | 0.15541149  |
| ENSGALG00010025377 | 0.936266582 | 0.290809093 |
| ENSGALG00010025378 | 0.925977157 | 0.128453585 |
| ENSGALG00010025379 | 0.983254747 | 0.327522646 |
| ENSGALG00010025380 | 0.197866827 | 0.027986115 |
| ENSGALG00010025381 | 0.955610262 | 0.374517503 |
| ENSGALG00010025382 | 0.53772341  | 0.2142241   |
| ENSGALG00010025383 | 0.212956652 | 0.216908197 |
| ENSGALG00010025384 | 0.943240016 | 0.246126177 |
| ENSGALG00010025385 | 0.313094935 | 0.224123301 |
| ENSGALG00010025386 | 0.95332442  | 0.379464924 |
| ENSGALG00010025387 | 0.689405423 | 0.326608205 |
| ENSGALG00010025389 | 0.90857459  | 0.185361579 |
| ENSGALG00010025390 | 0.964808944 | 0.399454972 |
| ENSGALG00010025392 | 0.001330564 | 0.275812528 |
| ENSGALG00010025394 | 0.899339307 | 0.405143446 |
| ENSGALG00010025395 | 0.675869829 | 0.283579069 |

|                    |             |             |
|--------------------|-------------|-------------|
| ENSGALG00010025396 | 0.394327047 | 0.133628127 |
| ENSGALG00010025398 | 0.559567353 | 0.265250553 |
| ENSGALG00010025399 | 0.187514554 | 0.108479243 |
| ENSGALG00010025400 | 0.953263162 | 0.316920027 |
| ENSGALG00010025403 | 0.925521534 | 0.360534218 |
| ENSGALG00010025404 | 0.488537825 | 0.227100959 |
| ENSGALG00010025405 | 0.936675435 | 0.213462662 |
| ENSGALG00010025406 | 0.914497786 | 0.308721383 |
| ENSGALG00010025407 | 0.822427983 | 0.26263614  |
| ENSGALG00010025410 | 0.14323154  | 0.195038989 |
| ENSGALG00010025411 | 0.127541883 | 0.101503614 |
| ENSGALG00010025413 | 0.904749576 | 0.274029245 |
| ENSGALG00010025414 | 0.92168626  | 0.452508826 |
| ENSGALG00010025415 | 0.949982297 | 0.328450408 |
| ENSGALG00010025416 | 0.724434269 | 0.363229366 |
| ENSGALG00010025417 | 0.870932456 | 0.339738147 |
| ENSGALG00010025418 | 0.986482301 | 0.332237443 |
| ENSGALG00010025419 | 0.915234631 | 0.256609005 |
| ENSGALG00010025420 | 0.774955436 | 0.188626076 |
| ENSGALG00010025421 | 0.97564244  | 0.329170689 |
| ENSGALG00010025422 | 0.616932816 | 0.209491807 |
| ENSGALG00010025423 | 0.862640765 | 0.19091262  |
| ENSGALG00010025424 | 0.245700908 | 0.010899108 |
| ENSGALG00010025425 | 0.408545516 | 0.270441321 |
| ENSGALG00010025426 | 0.895578048 | 0.201960399 |
| ENSGALG00010025427 | 0.933696204 | 0.377496103 |
| ENSGALG00010025428 | 0.953430775 | 0.236958831 |
| ENSGALG00010025429 | 0.328743492 | 0.129197287 |
| ENSGALG00010025431 | 0.111816492 | 0.088629934 |
| ENSGALG00010025432 | 0.601988976 | 0.00950416  |
| ENSGALG00010025433 | 0.941720455 | 0.322825692 |
| ENSGALG00010025434 | 0.677019532 | 0.253534204 |
| ENSGALG00010025435 | 0.899184442 | 0.421181456 |
| ENSGALG00010025436 | 0.265558089 | 0.028821141 |
| ENSGALG00010025437 | 0.311398252 | 0.127905775 |
| ENSGALG00010025438 | 0.901582935 | 0.378347282 |
| ENSGALG00010025440 | 0.962705774 | 0.364216645 |
| ENSGALG00010025442 | 0.993997467 | 0.319162593 |
| ENSGALG00010025444 | 0.869416989 | 0.296891146 |
| ENSGALG00010025445 | 0.860261955 | 0.455631464 |
| ENSGALG00010025446 | 0.024864555 | 0.352909512 |
| ENSGALG00010025447 | 0.523092456 | 0.640312765 |
| ENSGALG00010025448 | 0.61646547  | 0.2533504   |
| ENSGALG00010025449 | 0.652389385 | 0.202034898 |
| ENSGALG00010025451 | 0.105273261 | 0.02311766  |
| ENSGALG00010025452 | 0.665100665 | 0.388473743 |
| ENSGALG00010025454 | 0.394271748 | 0.144488011 |
| ENSGALG00010025455 | 0.954442394 | 0.376422205 |
| ENSGALG00010025456 | 0.844930195 | 0.355639006 |
| ENSGALG00010025458 | 0.524649134 | 0.064551918 |
| ENSGALG00010025459 | 0.632842372 | 0.141045055 |
| ENSGALG00010025460 | 0.661245705 | 0.29296673  |
| ENSGALG00010025463 | 0.648118454 | 0.104239374 |
| ENSGALG00010025464 | 0.620381441 | 0.130315556 |
| ENSGALG00010025465 | 0.953428033 | 0.203403866 |
| ENSGALG00010025466 | 0.020656918 | 0.064774402 |

|                    |             |             |
|--------------------|-------------|-------------|
| ENSGALG00010025470 | 0.250982019 | 0.138810371 |
| ENSGALG00010025471 | 0.319320077 | 0.024051854 |
| ENSGALG00010025472 | 0.714144873 | 0.331339269 |
| ENSGALG00010025473 | 0.254854622 | 0.325784632 |
| ENSGALG00010025476 | 0.44250459  | 0.194406598 |
| ENSGALG00010025477 | 0.843332981 | 0.296047489 |
| ENSGALG00010025478 | 0.203991683 | 0.058221925 |
| ENSGALG00010025479 | 0.256828349 | 0.119064955 |
| ENSGALG00010025480 | 0.364118301 | 0.144929949 |
| ENSGALG00010025481 | 0.933111417 | 0.306017159 |
| ENSGALG00010025483 | 0.977600694 | 0.280956896 |
| ENSGALG00010025485 | 0.932512267 | 0.329240771 |
| ENSGALG00010025486 | 0.889428576 | 0.268166304 |
| ENSGALG00010025488 | 0.228167445 | 0.174508845 |
| ENSGALG00010025490 | 0.480317276 | 0.038215845 |
| ENSGALG00010025491 | 0.978652175 | 0.341512959 |
| ENSGALG00010025492 | 0.134010064 | 0.201768367 |
| ENSGALG00010025493 | 0.655946165 | 0.343142924 |
| ENSGALG00010025494 | 0.285272007 | 0.109169955 |
| ENSGALG00010025496 | 0.977706643 | 0.34482428  |
| ENSGALG00010025499 | 0.996412146 | 0.327278646 |
| ENSGALG00010025504 | 0.995496304 | 0.335472491 |
| ENSGALG00010025505 | 0.502421136 | 0.002727107 |
| ENSGALG00010025506 | 0.960858715 | 0.296680085 |
| ENSGALG00010025508 | 0.371363241 | 0.262803777 |
| ENSGALG00010025509 | 0.379969153 | 0.146014072 |
| ENSGALG00010025511 | 0.271701261 | 0.072417625 |
| ENSGALG00010025512 | 0.336529924 | 0.338246544 |
| ENSGALG00010025513 | 0.427383873 | 0.389429401 |
| ENSGALG00010025515 | 0.425533569 | 0.152495024 |
| ENSGALG00010025516 | 0.856849604 | 0.341451921 |
| ENSGALG00010025517 | 0.779121322 | 0.325614795 |
| ENSGALG00010025520 | 0.618166591 | 0.030526867 |
| ENSGALG00010025522 | 0.02356128  | 0.063279562 |
| ENSGALG00010025523 | 0.479418787 | 0.111787351 |
| ENSGALG00010025524 | 0.265558089 | 0.028821141 |
| ENSGALG00010025527 | 0.756331681 | 0.263315629 |
| ENSGALG00010025530 | 0.315020464 | 0.160576986 |
| ENSGALG00010025531 | 0.935701388 | 0.425824021 |
| ENSGALG00010025532 | 0.112701073 | 0.170190663 |
| ENSGALG00010025533 | 0.964363091 | 0.429008421 |
| ENSGALG00010025535 | 0.555221782 | 0.223462608 |
| ENSGALG00010025536 | 0.489745363 | 0.210530503 |
| ENSGALG00010025537 | 0.501612846 | 0.160124173 |
| ENSGALG00010025538 | 0.34118751  | 0.032724182 |
| ENSGALG00010025541 | 0.634657014 | 0.064510317 |
| ENSGALG00010025542 | 0.474658292 | 0.023443461 |
| ENSGALG00010025543 | 0.601907254 | 0.313795732 |
| ENSGALG00010025544 | 0.981804653 | 0.269706078 |
| ENSGALG00010025545 | 0.976634722 | 0.193956702 |
| ENSGALG00010025546 | 0.975189082 | 0.34372375  |
| ENSGALG00010025547 | 0.83679314  | 0.293038668 |
| ENSGALG00010025548 | 0.54832323  | 0.224399958 |
| ENSGALG00010025549 | 0.911207582 | 0.233840833 |
| ENSGALG00010025553 | 0.503366675 | 0.147030659 |
| ENSGALG00010025554 | 0.506759125 | 0.137777757 |

|                    |             |             |
|--------------------|-------------|-------------|
| ENSGALG00010025555 | 0.942397469 | 0.380789102 |
| ENSGALG00010025556 | 0.417333311 | 0.169634281 |
| ENSGALG00010025557 | 0.950532109 | 0.397124603 |
| ENSGALG00010025558 | 0.778987991 | 0.216552077 |
| ENSGALG00010025560 | 0.293185829 | 0.256216488 |
| ENSGALG00010025561 | 0.387659376 | 0.117915307 |
| ENSGALG00010025562 | 0.770713167 | 0.176147492 |
| ENSGALG00010025563 | 0.354294363 | 0.32433785  |
| ENSGALG00010025564 | 0.287306084 | 0.323228033 |
| ENSGALG00010025565 | 0.386506079 | 0.168170232 |
| ENSGALG00010025567 | 0.482282027 | 0.149449428 |
| ENSGALG00010025568 | 0.499238288 | 0.39137666  |
| ENSGALG00010025569 | 0.308093876 | 0.191573855 |
| ENSGALG00010025570 | 0.189240572 | 0.04996112  |
| ENSGALG00010025571 | 0.539180348 | 0.463613076 |
| ENSGALG00010025572 | 0.038114492 | 0.060138221 |
| ENSGALG00010025573 | 0.87765187  | 0.411114659 |
| ENSGALG00010025574 | 0.724811224 | 0.104098157 |
| ENSGALG00010025575 | 0.467679419 | 0.440970569 |
| ENSGALG00010025576 | 0.243917537 | 0.031017863 |
| ENSGALG00010025577 | 0.971690859 | 0.390299605 |
| ENSGALG00010025578 | 0.827481711 | 0.335969721 |
| ENSGALG00010025579 | 0.769902836 | 0.035092762 |
| ENSGALG00010025580 | 0.935710989 | 0.411394636 |
| ENSGALG00010025581 | 0.39155441  | 0.07460765  |
| ENSGALG00010025582 | 0.784462464 | 0.162015247 |
| ENSGALG00010025583 | 0.198196562 | 0.151040066 |
| ENSGALG00010025585 | 0.159052054 | 0.177497987 |
| ENSGALG00010025586 | 0.05566616  | 0.236883668 |
| ENSGALG00010025587 | 0.829522192 | 0.375301092 |
| ENSGALG00010025588 | 0.596446383 | 0.247898115 |
| ENSGALG00010025589 | 0.16370231  | 0.222721419 |
| ENSGALG00010025590 | 0.869212398 | 0.323197453 |
| ENSGALG00010025591 | 0.610714521 | 0.345085022 |
| ENSGALG00010025592 | 0.81079556  | 0.262765646 |
| ENSGALG00010025594 | 0.250503259 | 0.171342079 |
| ENSGALG00010025595 | 0.957484185 | 0.362267032 |
| ENSGALG00010025597 | 0.208908584 | 0.09677408  |
| ENSGALG00010025598 | 0.427284053 | 0.512993905 |
| ENSGALG00010025599 | 0.978573302 | 0.323420126 |
| ENSGALG00010025600 | 0.760421295 | 0.304759964 |
| ENSGALG00010025601 | 0.333496467 | 0.22479672  |
| ENSGALG00010025604 | 0.677832206 | 0.198411175 |
| ENSGALG00010025605 | 0.264239718 | 0.073427965 |
| ENSGALG00010025606 | 0.817990243 | 0.133745564 |
| ENSGALG00010025607 | 0.712237583 | 0.100187794 |
| ENSGALG00010025608 | 0.388000333 | 0.289740802 |
| ENSGALG00010025609 | 0.277566769 | 0.107857127 |
| ENSGALG00010025610 | 0.257317102 | 0.20095426  |
| ENSGALG00010025611 | 0.871956531 | 0.294149446 |
| ENSGALG00010025612 | 0.793028663 | 0.47651601  |
| ENSGALG00010025613 | 0.909559466 | 0.329958504 |
| ENSGALG00010025614 | 0.51803537  | 0.00193194  |
| ENSGALG00010025617 | 0.309488172 | 0.159626796 |
| ENSGALG00010025618 | 0.989562192 | 0.364287411 |
| ENSGALG00010025621 | 0.855758328 | 0.360710533 |

|                    |             |             |
|--------------------|-------------|-------------|
| ENSGALG00010025623 | 0.91737847  | 0.605700787 |
| ENSGALG00010025624 | 0.111491635 | 0.302461543 |
| ENSGALG00010025628 | 0.29212014  | 0.404766674 |
| ENSGALG00010025629 | 0.954666411 | 0.264607967 |
| ENSGALG00010025632 | 0.098176012 | 0.230786181 |
| ENSGALG00010025633 | 0.975932792 | 0.332599367 |
| ENSGALG00010025634 | 0.723138806 | 0.090943541 |
| ENSGALG00010025635 | 0.947797965 | 0.250208631 |
| ENSGALG00010025636 | 0.469547605 | 0.111209253 |
| ENSGALG00010025637 | 0.991261705 | 0.270677475 |
| ENSGALG00010025638 | 0.595846964 | 0.243043205 |
| ENSGALG00010025639 | 0.42873774  | 0.191369203 |
| ENSGALG00010025640 | 0.759455879 | 0.227233532 |
| ENSGALG00010025641 | 0.445381203 | 0.017983906 |
| ENSGALG00010025642 | 0.811627412 | 0.31500232  |
| ENSGALG00010025643 | 0.044986643 | 0.113504759 |
| ENSGALG00010025644 | 0.247131793 | 0.284383911 |
| ENSGALG00010025645 | 0.961212125 | 0.329665575 |
| ENSGALG00010025646 | 0.361724536 | 0.300421964 |
| ENSGALG00010025647 | 0.660096532 | 0.192525209 |
| ENSGALG00010025648 | 0.954511811 | 0.218659196 |
| ENSGALG00010025649 | 0.326003616 | 0.301008457 |
| ENSGALG00010025650 | 0.961638347 | 0.291183972 |
| ENSGALG00010025652 | 0.867103479 | 0.453492582 |
| ENSGALG00010025653 | 0.916207647 | 0.234206381 |
| ENSGALG00010025654 | 0.975043955 | 0.269956054 |
| ENSGALG00010025655 | 0.027351409 | 0.220055346 |
| ENSGALG00010025657 | 0.877709958 | 0.118928864 |
| ENSGALG00010025658 | 0.905157502 | 0.317085728 |
| ENSGALG00010025659 | 0.970788093 | 0.303035377 |
| ENSGALG00010025660 | 0.69632177  | 0.124189822 |
| ENSGALG00010025661 | 0.936397477 | 0.324005718 |
| ENSGALG00010025663 | 0.463235288 | 0.115149902 |
| ENSGALG00010025664 | 0.888825786 | 0.076763241 |
| ENSGALG00010025665 | 0.580960191 | 0.221984986 |
| ENSGALG00010025666 | 0.983267396 | 0.383364664 |
| ENSGALG00010025668 | 0.888194465 | 0.271185001 |
| ENSGALG00010025671 | 0.984678595 | 0.347142111 |
| ENSGALG00010025672 | 0.446756698 | 0.055080262 |
| ENSGALG00010025673 | 0.954511574 | 0.24347901  |
| ENSGALG00010025674 | 0.920753256 | 0.236968002 |
| ENSGALG00010025675 | 0.031329216 | 0.144699932 |
| ENSGALG00010025678 | 0.261521937 | 0.275508417 |
| ENSGALG00010025681 | 0.852282678 | 0.468446352 |
| ENSGALG00010025684 | 0.882264674 | 0.187888346 |
| ENSGALG00010025685 | 0.951031726 | 0.295014549 |
| ENSGALG00010025687 | 0.482518465 | 0.063868665 |
| ENSGALG00010025688 | 0.412716415 | 0.03873236  |
| ENSGALG00010025689 | 0.481103591 | 0.067111283 |
| ENSGALG00010025691 | 0.612098934 | 0.03374001  |
| ENSGALG00010025692 | 0.826178942 | 0.230382445 |
| ENSGALG00010025693 | 0.758879358 | 0.168235041 |
| ENSGALG00010025696 | 0.924677134 | 0.282991474 |
| ENSGALG00010025698 | 0.277566769 | 0.107857127 |
| ENSGALG00010025699 | 0.769468925 | 0.361032123 |
| ENSGALG00010025702 | 0.604372131 | 0.20468805  |



|                    |             |             |
|--------------------|-------------|-------------|
| ENSGALG00010025703 | 0.808753474 | 0.02208857  |
| ENSGALG00010025704 | 0.329744371 | 0.371370966 |
| ENSGALG00010025705 | 0.877664146 | 0.286008002 |
| ENSGALG00010025708 | 0.886607486 | 0.04814033  |
| ENSGALG00010025712 | 0.797210278 | 0.127171789 |
| ENSGALG00010025713 | 0.649479105 | 0.348539741 |
| ENSGALG00010025714 | 0.319311594 | 0.353226242 |
| ENSGALG00010025716 | 0.24825154  | 0.586610038 |
| ENSGALG00010025717 | 0.922027122 | 0.410116659 |
| ENSGALG00010025720 | 0.970841823 | 0.257012643 |
| ENSGALG00010025723 | 0.743931467 | 0.196103509 |
| ENSGALG00010025727 | 0.864372139 | 0.228437055 |
| ENSGALG00010025731 | 0.948038447 | 0.304798918 |
| ENSGALG00010025733 | 0.016763015 | 0.076327924 |
| ENSGALG00010025734 | 0.419514768 | 0.2613498   |
| ENSGALG00010025735 | 0.441297911 | 0.226728942 |
| ENSGALG00010025736 | 0.778076799 | 0.443698137 |
| ENSGALG00010025737 | 0.971431329 | 0.228674199 |
| ENSGALG00010025738 | 0.53402376  | 0.081083233 |
| ENSGALG00010025739 | 0.375927362 | 0.072713138 |
| ENSGALG00010025740 | 0.103562557 | 0.343273643 |
| ENSGALG00010025741 | 0.39190877  | 0.131701825 |
| ENSGALG00010025742 | 0.980202079 | 0.352848275 |
| ENSGALG00010025743 | 0.949274095 | 0.250163998 |
| ENSGALG00010025744 | 0.275740267 | 0.144739672 |
| ENSGALG00010025745 | 0.983245581 | 0.319871146 |
| ENSGALG00010025747 | 0.489688642 | 0.142768469 |
| ENSGALG00010025748 | 0.923756663 | 0.444853608 |
| ENSGALG00010025750 | 0.948741924 | 0.305683774 |
| ENSGALG00010025753 | 0.987540831 | 0.31345112  |
| ENSGALG00010025755 | 0.798467054 | 0.321109259 |
| ENSGALG00010025756 | 0.353313305 | 0.24075221  |
| ENSGALG00010025758 | 0.101653335 | 0.142607874 |
| ENSGALG00010025763 | 0.386661145 | 0.092431087 |
| ENSGALG00010025766 | 0.473932792 | 0.434932788 |
| ENSGALG00010025767 | 0.44214781  | 0.148485418 |
| ENSGALG00010025769 | 0.293985632 | 0.14519096  |
| ENSGALG00010025770 | 0.329713792 | 0.203369349 |
| ENSGALG00010025771 | 0.270451009 | 0.090541667 |
| ENSGALG00010025772 | 0.379394869 | 0.170237467 |
| ENSGALG00010025774 | 0.228836647 | 0.070265399 |
| ENSGALG00010025775 | 0.052836869 | 0.101827534 |
| ENSGALG00010025776 | 0.114803004 | 0.15756782  |
| ENSGALG00010025781 | 0.125104501 | 0.078185614 |
| ENSGALG00010025785 | 0.936020627 | 0.386104493 |
| ENSGALG00010025786 | 0.539710938 | 0.307598517 |
| ENSGALG00010025787 | 0.748030983 | 0.486251314 |
| ENSGALG00010025788 | 0.490726529 | 0.122373879 |
| ENSGALG00010025789 | 0.785178061 | 0.224148124 |
| ENSGALG00010025790 | 0.957774242 | 0.33653173  |
| ENSGALG00010025791 | 0.712405576 | 0.310939724 |
| ENSGALG00010025793 | 0.597269398 | 0.160997067 |
| ENSGALG00010025796 | 0.341269885 | 0.029948769 |
| ENSGALG00010025798 | 0.30407317  | 0.400998254 |
| ENSGALG00010025799 | 0.899637482 | 0.28990369  |
| ENSGALG00010025800 | 0.515721984 | 0.567269421 |

|                    |             |             |
|--------------------|-------------|-------------|
| ENSGALG00010025801 | 0.78500674  | 0.117548414 |
| ENSGALG00010025802 | 0.354205285 | 0.12892787  |
| ENSGALG00010025805 | 0.830058728 | 0.264806513 |
| ENSGALG00010025806 | 0.947700121 | 0.143019741 |
| ENSGALG00010025809 | 0.734910658 | 0.41954087  |
| ENSGALG00010025810 | 0.070197589 | 0.372408104 |
| ENSGALG00010025811 | 0.348032803 | 0.146426442 |
| ENSGALG00010025815 | 0.912480374 | 0.371598186 |
| ENSGALG00010025817 | 0.355639478 | 0.141537604 |
| ENSGALG00010025820 | 0.270451009 | 0.090541667 |
| ENSGALG00010025822 | 0.851856135 | 0.089007078 |
| ENSGALG00010025824 | 0.595232013 | 0.042886564 |
| ENSGALG00010025825 | 0.199041595 | 0.200784023 |
| ENSGALG00010025826 | 0.290515358 | 0.070869158 |
| ENSGALG00010025828 | 0.647850157 | 0.302984245 |
| ENSGALG00010025829 | 0.454143018 | 0.291641342 |
| ENSGALG00010025830 | 0.966787429 | 0.352517077 |
| ENSGALG00010025831 | 0.884880918 | 0.244338758 |
| ENSGALG00010025832 | 0.834401424 | 0.528013399 |
| ENSGALG00010025833 | 0.944006856 | 0.253210231 |
| ENSGALG00010025835 | 0.919332334 | 0.454547054 |
| ENSGALG00010025836 | 0.94539839  | 0.3796478   |
| ENSGALG00010025837 | 0.455491161 | 0.002055857 |
| ENSGALG00010025838 | 0.348165477 | 0.035563623 |
| ENSGALG00010025839 | 0.939275016 | 0.248181833 |
| ENSGALG00010025843 | 0.863676758 | 0.342582847 |
| ENSGALG00010025844 | 0.670532637 | 0.042565208 |
| ENSGALG00010025845 | 0.539193948 | 0.2152994   |
| ENSGALG00010025846 | 0.038165923 | 0.10358575  |
| ENSGALG00010025847 | 0.882975952 | 0.18400148  |
| ENSGALG00010025848 | 0.174596352 | 0.460105186 |
| ENSGALG00010025849 | 0.99391261  | 0.321728716 |
| ENSGALG00010025850 | 0.175960236 | 0.195005168 |
| ENSGALG00010025851 | 0.000893823 | 0.500599188 |
| ENSGALG00010025852 | 0.668537827 | 0.481461662 |
| ENSGALG00010025854 | 0.212199218 | 0.180143923 |
| ENSGALG00010025856 | 0.403349636 | 0.298877835 |
| ENSGALG00010025857 | 0.857812885 | 0.260769396 |
| ENSGALG00010025860 | 0.676335277 | 0.31057721  |
| ENSGALG00010025861 | 0.782360091 | 0.02258801  |
| ENSGALG00010025862 | 0.538039428 | 0.125690459 |
| ENSGALG00010025863 | 0.204589043 | 0.218713816 |
| ENSGALG00010025864 | 0.81633546  | 0.415676695 |
| ENSGALG00010025865 | 0.265555066 | 0.192319121 |
| ENSGALG00010025866 | 0.099242338 | 0.132709837 |
| ENSGALG00010025867 | 0.058751725 | 0.152800327 |
| ENSGALG00010025869 | 0.873518073 | 0.315852203 |
| ENSGALG00010025870 | 0.301280706 | 0.449879566 |
| ENSGALG00010025872 | 0.957516422 | 0.415703228 |
| ENSGALG00010025874 | 0.641905225 | 0.466989187 |
| ENSGALG00010025880 | 0.946599985 | 0.454522468 |
| ENSGALG00010025881 | 0.675088565 | 0.178540007 |
| ENSGALG00010025882 | 0.906459459 | 0.360552123 |
| ENSGALG00010025883 | 0.538073254 | 0.132130203 |
| ENSGALG00010025886 | 0.047989055 | 0.114544364 |
| ENSGALG00010025887 | 0.34875575  | 0.37938357  |

|                    |             |             |
|--------------------|-------------|-------------|
| ENSGALG00010025888 | 0.102937049 | 0.231959204 |
| ENSGALG00010025889 | 0.958064568 | 0.362700408 |
| ENSGALG00010025890 | 0.900670861 | 0.391869239 |
| ENSGALG00010025891 | 0.68770806  | 0.439847158 |
| ENSGALG00010025892 | 0.834906674 | 0.447211998 |
| ENSGALG00010025894 | 0.02931309  | 0.104495807 |
| ENSGALG00010025896 | 0.187514554 | 0.108479243 |
| ENSGALG00010025897 | 0.959967841 | 0.287660438 |
| ENSGALG00010025899 | 0.870141156 | 0.322945307 |
| ENSGALG00010025900 | 0.404186295 | 0.077281686 |
| ENSGALG00010025903 | 0.129889745 | 0.169631389 |
| ENSGALG00010025904 | 0.832537526 | 0.309615779 |
| ENSGALG00010025905 | 0.981552618 | 0.347064609 |
| ENSGALG00010025906 | 0.847888971 | 0.487179621 |
| ENSGALG00010025907 | 0.914465119 | 0.286103745 |
| ENSGALG00010025908 | 0.360407633 | 0.310955723 |
| ENSGALG00010025909 | 0.260203497 | 0.242950444 |
| ENSGALG00010025910 | 0.92965732  | 0.20685052  |
| ENSGALG00010025911 | 0.068572699 | 0.253569288 |
| ENSGALG00010025912 | 0.168321586 | 0.146624045 |
| ENSGALG00010025913 | 0.972330396 | 0.25351719  |
| ENSGALG00010025914 | 0.559627486 | 0.147134965 |
| ENSGALG00010025917 | 0.971811831 | 0.365275061 |
| ENSGALG00010025918 | 0.451631885 | 0.333966577 |
| ENSGALG00010025919 | 0.480030643 | 0.186463434 |
| ENSGALG00010025920 | 0.780212031 | 0.463565837 |
| ENSGALG00010025922 | 0.384165008 | 0.165101073 |
| ENSGALG00010025923 | 0.343522853 | 0.200260068 |
| ENSGALG00010025924 | 0.780305009 | 0.179313781 |
| ENSGALG00010025925 | 0.366349475 | 0.082494236 |
| ENSGALG00010025926 | 0.478023857 | 0.258352166 |
| ENSGALG00010025928 | 0.554520669 | 0.021827879 |
| ENSGALG00010025929 | 0.907410697 | 0.248970532 |
| ENSGALG00010025930 | 0.742133042 | 0.217009887 |
| ENSGALG00010025931 | 0.826962648 | 0.286057345 |
| ENSGALG00010025932 | 0.973359165 | 0.242863688 |
| ENSGALG00010025933 | 0.979100401 | 0.291106016 |
| ENSGALG00010025934 | 0.07108268  | 0.297262155 |
| ENSGALG00010025935 | 0.563215423 | 0.097885273 |
| ENSGALG00010025936 | 0.907935387 | 0.221989655 |
| ENSGALG00010025937 | 0.861789741 | 0.317552219 |
| ENSGALG00010025938 | 0.960140638 | 0.310399016 |
| ENSGALG00010025939 | 0.247406418 | 0.154863212 |
| ENSGALG00010025940 | 0.367011271 | 0.244011328 |
| ENSGALG00010025941 | 0.590220505 | 0.228803027 |
| ENSGALG00010025943 | 0.889945584 | 0.214194937 |
| ENSGALG00010025945 | 0.574273966 | 0.219839548 |
| ENSGALG00010025946 | 0.309152578 | 0.416634701 |
| ENSGALG00010025949 | 0.714700956 | 0.312365395 |
| ENSGALG00010025950 | 0.671640244 | 0.191813156 |
| ENSGALG00010025951 | 0.882190548 | 0.257361014 |
| ENSGALG00010025952 | 0.947109327 | 0.32518133  |
| ENSGALG00010025954 | 0.584914176 | 0.014182997 |
| ENSGALG00010025955 | 0.199586067 | 0.015517605 |
| ENSGALG00010025956 | 0.900892708 | 0.255879081 |
| ENSGALG00010025957 | 0.989118895 | 0.307524083 |

|                    |             |             |
|--------------------|-------------|-------------|
| ENSGALG00010025958 | 0.696714708 | 0.02108306  |
| ENSGALG00010025959 | 0.063693293 | 0.122451768 |
| ENSGALG00010025960 | 0.940286284 | 0.317911325 |
| ENSGALG00010025961 | 0.210381064 | 0.122626751 |
| ENSGALG00010025962 | 0.741366582 | 0.02889454  |
| ENSGALG00010025963 | 0.982004917 | 0.312771073 |
| ENSGALG00010025965 | 0.055573343 | 0.49874354  |
| ENSGALG00010025966 | 0.003830079 | 0.379623043 |
| ENSGALG00010025968 | 0.990028283 | 0.297240404 |
| ENSGALG00010025969 | 0.283012089 | 0.206673807 |
| ENSGALG00010025970 | 0.940709949 | 0.311647297 |
| ENSGALG00010025971 | 0.968213203 | 0.334778335 |
| ENSGALG00010025972 | 0.179797963 | 0.163193665 |
| ENSGALG00010025973 | 0.879583975 | 0.395517891 |
| ENSGALG00010025974 | 0.943357507 | 0.306243279 |
| ENSGALG00010025975 | 0.20823267  | 0.068514942 |
| ENSGALG00010025976 | 0.046708758 | 0.290796188 |
| ENSGALG00010025977 | 0.870684843 | 0.191365601 |
| ENSGALG00010025978 | 0.052836869 | 0.101827534 |
| ENSGALG00010025979 | 0.949616221 | 0.26370202  |
| ENSGALG00010025980 | 0.965613546 | 0.349673743 |
| ENSGALG00010025981 | 0.057588202 | 0.120194332 |
| ENSGALG00010025982 | 0.080096649 | 0.231139376 |
| ENSGALG00010025983 | 0.885325272 | 0.029465539 |
| ENSGALG00010025984 | 0.860785337 | 0.30539625  |
| ENSGALG00010025985 | 0.311726247 | 0.083677434 |
| ENSGALG00010025986 | 0.932613564 | 0.328412586 |
| ENSGALG00010025988 | 0.825726884 | 0.335977741 |
| ENSGALG00010025990 | 0.442184346 | 0.175638411 |
| ENSGALG00010025991 | 0.367295315 | 0.457889722 |
| ENSGALG00010025992 | 0.705832487 | 0.375101214 |
| ENSGALG00010025993 | 0.308600579 | 0.142811058 |
| ENSGALG00010025994 | 0.879104721 | 0.26470511  |
| ENSGALG00010025995 | 0.948042524 | 0.384135636 |
| ENSGALG00010025996 | 0.996377386 | 0.306274094 |
| ENSGALG00010025997 | 0.966453521 | 0.225412671 |
| ENSGALG00010025998 | 0.098948842 | 0.344731271 |
| ENSGALG00010025999 | 0.566877157 | 0.318571238 |
| ENSGALG00010026000 | 0.430396274 | 0.163132962 |
| ENSGALG00010026001 | 0.118027285 | 0.023079149 |
| ENSGALG00010026002 | 0.835995065 | 0.284265156 |
| ENSGALG00010026003 | 0.805140081 | 0.007945764 |
| ENSGALG00010026004 | 0.381415582 | 0.158761082 |
| ENSGALG00010026005 | 0.916159629 | 0.296357135 |
| ENSGALG00010026006 | 0.464757457 | 0.084879844 |
| ENSGALG00010026007 | 0.460363179 | 0.196807947 |
| ENSGALG00010026008 | 0.595963434 | 0.096814938 |
| ENSGALG00010026009 | 0.908191008 | 0.038480022 |
| ENSGALG00010026010 | 0.931499445 | 0.202088546 |
| ENSGALG00010026011 | 0.745032148 | 0.412465477 |
| ENSGALG00010026013 | 0.965971079 | 0.391285518 |
| ENSGALG00010026015 | 0.11966357  | 0.272919694 |
| ENSGALG00010026016 | 0.897972284 | 0.294745885 |
| ENSGALG00010026018 | 0.245430813 | 0.175511689 |
| ENSGALG00010026019 | 0.467720654 | 0.324622962 |
| ENSGALG00010026021 | 0.212146324 | 0.27647893  |

|                    |             |             |
|--------------------|-------------|-------------|
| ENSGALG00010026023 | 0.958635198 | 0.377037058 |
| ENSGALG00010026026 | 0.405071667 | 0.170520944 |
| ENSGALG00010026027 | 0.901014717 | 0.20736042  |
| ENSGALG00010026030 | 0.593907031 | 0.113729652 |
| ENSGALG00010026031 | 0.616488709 | 0.089788433 |
| ENSGALG00010026033 | 0.891583497 | 0.296246811 |
| ENSGALG00010026034 | 0.27125251  | 0.180804602 |
| ENSGALG00010026035 | 0.327798841 | 0.049503364 |
| ENSGALG00010026036 | 0.739377072 | 0.164367494 |
| ENSGALG00010026037 | 0.266137114 | 0.107784983 |
| ENSGALG00010026038 | 0.395556858 | 0.102965232 |
| ENSGALG00010026040 | 0.943471936 | 0.304690506 |
| ENSGALG00010026041 | 0.528687065 | 0.431812039 |
| ENSGALG00010026042 | 0.02436834  | 0.087960992 |
| ENSGALG00010026043 | 0.39276112  | 0.274252474 |
| ENSGALG00010026044 | 0.690492776 | 0.506179969 |
| ENSGALG00010026045 | 0.944421526 | 0.349923239 |
| ENSGALG00010026046 | 0.780404524 | 0.22429707  |
| ENSGALG00010026051 | 0.897754269 | 0.352874572 |
| ENSGALG00010026053 | 0.510458542 | 0.009963926 |
| ENSGALG00010026056 | 0.403610966 | 0.309898237 |
| ENSGALG00010026058 | 0.097513339 | 0.023967495 |
| ENSGALG00010026059 | 0.987197197 | 0.366180821 |
| ENSGALG00010026060 | 0.467875361 | 0.023091982 |
| ENSGALG00010026061 | 0.864151599 | 0.366805829 |
| ENSGALG00010026062 | 0.948398883 | 0.220824103 |
| ENSGALG00010026063 | 0.887963455 | 0.203975301 |
| ENSGALG00010026064 | 0.940690137 | 0.254897417 |
| ENSGALG00010026066 | 0.978289576 | 0.252016137 |
| ENSGALG00010026068 | 0.857619197 | 0.278976458 |
| ENSGALG00010026069 | 0.990377185 | 0.355987957 |
| ENSGALG00010026070 | 0.31383023  | 0.338454411 |
| ENSGALG00010026073 | 0.765995143 | 0.111564953 |
| ENSGALG00010026076 | 0.904922726 | 0.255588174 |
| ENSGALG00010026078 | 0.98614277  | 0.302853919 |
| ENSGALG00010026079 | 0.677733381 | 0.270816745 |
| ENSGALG00010026081 | 0.872613739 | 0.388525745 |
| ENSGALG00010026083 | 0.821859445 | 0.378318399 |
| ENSGALG00010026085 | 0.114043601 | 0.287895224 |
| ENSGALG00010026086 | 0.359730054 | 0.159389574 |
| ENSGALG00010026087 | 0.939584143 | 0.216976082 |
| ENSGALG00010026088 | 0.968899685 | 0.23398072  |
| ENSGALG00010026089 | 0.977024524 | 0.318279355 |
| ENSGALG00010026090 | 0.98736338  | 0.354701973 |
| ENSGALG00010026091 | 7.00E-01    | 5.24E-05    |
| ENSGALG00010026092 | 0.547167668 | 0.150577659 |
| ENSGALG00010026093 | 0.83487461  | 0.307206688 |
| ENSGALG00010026094 | 0.838030321 | 0.263868101 |
| ENSGALG00010026095 | 0.848400042 | 0.312607674 |
| ENSGALG00010026097 | 0.459205388 | 0.305516661 |
| ENSGALG00010026098 | 0.902980501 | 0.283162219 |
| ENSGALG00010026099 | 0.099101311 | 0.375967491 |
| ENSGALG00010026100 | 0.068004522 | 0.318885568 |
| ENSGALG00010026101 | 0.059650661 | 0.385152578 |
| ENSGALG00010026102 | 0.689032312 | 0.262972367 |
| ENSGALG00010026103 | 0.570937068 | 0.276092743 |

|                    |             |             |
|--------------------|-------------|-------------|
| ENSGALG00010026104 | 0.946031212 | 0.282044541 |
| ENSGALG00010026105 | 0.733169866 | 0.157631584 |
| ENSGALG00010026106 | 0.569198987 | 0.221814102 |
| ENSGALG00010026107 | 0.402060142 | 0.145911736 |
| ENSGALG00010026108 | 0.20979263  | 0.06535578  |
| ENSGALG00010026109 | 0.142268032 | 0.383513863 |
| ENSGALG00010026111 | 0.152839347 | 0.032980537 |
| ENSGALG00010026112 | 0.988763922 | 0.26469499  |
| ENSGALG00010026113 | 0.858986656 | 0.18559086  |
| ENSGALG00010026114 | 0.942879339 | 0.395332529 |
| ENSGALG00010026115 | 0.922174647 | 0.296496653 |
| ENSGALG00010026116 | 0.238115312 | 0.800944552 |
| ENSGALG00010026117 | 0.701174695 | 0.657340456 |
| ENSGALG00010026120 | 0.661306668 | 0.404767329 |
| ENSGALG00010026121 | 0.843572655 | 0.175183002 |
| ENSGALG00010026122 | 0.431831647 | 0.199512818 |
| ENSGALG00010026124 | 0.047117039 | 0.095493806 |
| ENSGALG00010026125 | 0.187221887 | 0.16859055  |
| ENSGALG00010026126 | 0.258087249 | 0.123701198 |
| ENSGALG00010026127 | 0.728800034 | 0.395832485 |
| ENSGALG00010026128 | 0.985216973 | 0.312887193 |
| ENSGALG00010026130 | 0.385392063 | 0.133931937 |
| ENSGALG00010026131 | 0.295817771 | 0.175286565 |
| ENSGALG00010026132 | 0.979477284 | 0.34883989  |
| ENSGALG00010026133 | 0.897378512 | 0.391602176 |
| ENSGALG00010026135 | 0.270451009 | 0.090541667 |
| ENSGALG00010026137 | 0.932226692 | 0.31944971  |
| ENSGALG00010026143 | 0.880178983 | 0.167528969 |
| ENSGALG00010026145 | 0.204394796 | 0.384273876 |
| ENSGALG00010026148 | 0.910334375 | 0.295088521 |
| ENSGALG00010026149 | 0.81608809  | 0.069698708 |
| ENSGALG00010026151 | 0.8805117   | 0.382301971 |
| ENSGALG00010026154 | 0.869638821 | 0.403210659 |
| ENSGALG00010026155 | 0.277566769 | 0.107857127 |
| ENSGALG00010026156 | 0.906072768 | 0.269659227 |
| ENSGALG00010026159 | 0.943361119 | 0.376945104 |
| ENSGALG00010026162 | 0.65494678  | 0.280658559 |
| ENSGALG00010026163 | 0.964586306 | 0.288974471 |
| ENSGALG00010026165 | 0.518638737 | 0.197697833 |
| ENSGALG00010026166 | 0.741715828 | 0.133357132 |
| ENSGALG00010026167 | 0.825026827 | 0.338049956 |
| ENSGALG00010026170 | 0.10010901  | 0.111729267 |
| ENSGALG00010026171 | 0.264239718 | 0.073427965 |
| ENSGALG00010026172 | 0.069215939 | 0.312787575 |
| ENSGALG00010026173 | 0.487397397 | 0.059643958 |
| ENSGALG00010026174 | 0.006684895 | 0.161510246 |
| ENSGALG00010026176 | 0.388876865 | 0.186701289 |
| ENSGALG00010026177 | 0.762260386 | 0.208290321 |
| ENSGALG00010026183 | 0.857206263 | 0.278175807 |
| ENSGALG00010026184 | 0.991640899 | 0.334345149 |
| ENSGALG00010026186 | 0.391097471 | 0.144336359 |
| ENSGALG00010026187 | 0.002953388 | 0.313313918 |
| ENSGALG00010026188 | 0.504166556 | 0.007180957 |
| ENSGALG00010026189 | 0.494986208 | 0.164505697 |
| ENSGALG00010026190 | 0.373668088 | 0.160332228 |
| ENSGALG00010026191 | 0.171048961 | 0.278010478 |

|                    |             |             |
|--------------------|-------------|-------------|
| ENSGALG00010026192 | 0.988452028 | 0.381074846 |
| ENSGALG00010026193 | 0.252804965 | 0.381929009 |
| ENSGALG00010026195 | 0.901275807 | 0.319796629 |
| ENSGALG00010026196 | 0.451685302 | 0.411064578 |
| ENSGALG00010026199 | 0.886449478 | 0.237585089 |
| ENSGALG00010026202 | 0.933626744 | 0.410713281 |
| ENSGALG00010026203 | 0.657022453 | 0.521619407 |
| ENSGALG00010026205 | 0.992473198 | 0.289788206 |
| ENSGALG00010026208 | 0.392329638 | 0.175828901 |
| ENSGALG00010026209 | 0.9810841   | 0.322570182 |
| ENSGALG00010026210 | 0.245700908 | 0.010899108 |
| ENSGALG00010026211 | 0.25542332  | 0.219823953 |
| ENSGALG00010026213 | 0.949710079 | 0.332034082 |
| ENSGALG00010026214 | 0.952582229 | 0.307917922 |
| ENSGALG00010026215 | 0.286977485 | 0.247439799 |
| ENSGALG00010026216 | 0.82841021  | 0.303285128 |
| ENSGALG00010026217 | 0.526981051 | 0.20452168  |
| ENSGALG00010026218 | 0.872200791 | 0.255825279 |
| ENSGALG00010026219 | 0.942755076 | 0.347499484 |
| ENSGALG00010026220 | 0.95948404  | 0.399843418 |
| ENSGALG00010026221 | 0.971868884 | 0.332860396 |
| ENSGALG00010026223 | 0.626123579 | 0.182683871 |
| ENSGALG00010026224 | 0.953631566 | 0.324750931 |
| ENSGALG00010026225 | 0.410675159 | 0.384532076 |
| ENSGALG00010026226 | 0.942860282 | 0.309207449 |
| ENSGALG00010026229 | 0.3374524   | 0.16253848  |
| ENSGALG00010026232 | 0.982806177 | 0.313271071 |
| ENSGALG00010026233 | 0.065517623 | 0.014192041 |
| ENSGALG00010026234 | 0.956691671 | 0.298906183 |
| ENSGALG00010026235 | 0.973166857 | 0.23655297  |
| ENSGALG00010026236 | 0.325957356 | 0.610236796 |
| ENSGALG00010026237 | 0.978640368 | 0.307108801 |
| ENSGALG00010026238 | 0.095473757 | 0.237416683 |
| ENSGALG00010026239 | 0.504573231 | 0.197114758 |
| ENSGALG00010026240 | 0.041532654 | 0.541509146 |
| ENSGALG00010026241 | 0.946679813 | 0.231498074 |
| ENSGALG00010026242 | 0.405687968 | 0.171428318 |
| ENSGALG00010026244 | 0.515539735 | 0.365915727 |
| ENSGALG00010026246 | 0.847941077 | 0.139598941 |
| ENSGALG00010026249 | 0.305300423 | 0.100923143 |
| ENSGALG00010026250 | 0.824442609 | 0.269732527 |
| ENSGALG00010026252 | 0.461240722 | 0.292501289 |
| ENSGALG00010026253 | 0.178751709 | 0.427200959 |
| ENSGALG00010026255 | 0.203250927 | 0.146016153 |
| ENSGALG00010026256 | 0.017362381 | 0.009256585 |
| ENSGALG00010026258 | 0.670391699 | 0.228627598 |
| ENSGALG00010026259 | 0.943769854 | 0.287217799 |
| ENSGALG00010026261 | 0.939334253 | 0.361171748 |
| ENSGALG00010026262 | 0.769931077 | 0.421337598 |
| ENSGALG00010026264 | 0.05484482  | 0.109033392 |
| ENSGALG00010026266 | 0.419232156 | 0.016158533 |
| ENSGALG00010026267 | 0.277566769 | 0.107857127 |
| ENSGALG00010026268 | 0.813528607 | 0.244943411 |
| ENSGALG00010026269 | 0.394927857 | 0.119113854 |
| ENSGALG00010026272 | 0.961962585 | 0.309233742 |
| ENSGALG00010026277 | 0.945547001 | 0.283727704 |

|                    |             |             |
|--------------------|-------------|-------------|
| ENSGALG00010026282 | 0.247203048 | 0.342104972 |
| ENSGALG00010026283 | 0.934501459 | 0.248505022 |
| ENSGALG00010026284 | 0.153212822 | 0.121645841 |
| ENSGALG00010026287 | 0.520477459 | 0.105672889 |
| ENSGALG00010026289 | 0.957099034 | 0.285540196 |
| ENSGALG00010026290 | 0.258778752 | 0.242330282 |
| ENSGALG00010026291 | 0.977082035 | 0.32010623  |
| ENSGALG00010026292 | 0.791941507 | 0.430891537 |
| ENSGALG00010026293 | 0.958525662 | 0.313096245 |
| ENSGALG00010026295 | 0.923798348 | 0.393829432 |
| ENSGALG00010026296 | 0.98270843  | 0.235863883 |
| ENSGALG00010026297 | 0.914874755 | 0.321767339 |
| ENSGALG00010026298 | 0.97364899  | 0.301953463 |
| ENSGALG00010026300 | 0.922750027 | 0.37229541  |
| ENSGALG00010026301 | 0.445934283 | 0.210130073 |
| ENSGALG00010026303 | 0.256658325 | 0.290346532 |
| ENSGALG00010026305 | 0.627505245 | 0.331202186 |
| ENSGALG00010026306 | 0.89904087  | 0.337730338 |
| ENSGALG00010026307 | 0.045582495 | 0.125953552 |
| ENSGALG00010026308 | 0.909871448 | 0.336858492 |
| ENSGALG00010026310 | 0.67811027  | 0.26634437  |
| ENSGALG00010026311 | 0.021428271 | 0.17143496  |
| ENSGALG00010026312 | 0.825971836 | 0.440364672 |
| ENSGALG00010026313 | 0.308369125 | 0.226033304 |
| ENSGALG00010026314 | 0.49100695  | 0.155099052 |
| ENSGALG00010026315 | 0.507355254 | 0.303764549 |
| ENSGALG00010026316 | 0.81906179  | 0.310102992 |
| ENSGALG00010026317 | 0.062152491 | 0.095068005 |
| ENSGALG00010026318 | 0.280865346 | 0.279865599 |
| ENSGALG00010026320 | 0.693289803 | 0.068707058 |
| ENSGALG00010026321 | 0.952898083 | 0.341607606 |
| ENSGALG00010026325 | 0.076113767 | 0.189429522 |
| ENSGALG00010026328 | 0.948872271 | 0.216258104 |
| ENSGALG00010026329 | 0.767278521 | 0.306817902 |
| ENSGALG00010026331 | 0.129250193 | 0.225463741 |
| ENSGALG00010026332 | 0.78408296  | 0.307055952 |
| ENSGALG00010026333 | 0.364472745 | 0.19216895  |
| ENSGALG00010026334 | 0.918464758 | 0.329703745 |
| ENSGALG00010026335 | 0.691163381 | 0.143712061 |
| ENSGALG00010026336 | 0.911041478 | 0.350384655 |
| ENSGALG00010026337 | 0.47842013  | 0.059230431 |
| ENSGALG00010026338 | 0.325516549 | 0.016600499 |
| ENSGALG00010026339 | 0.806220419 | 0.296510033 |
| ENSGALG00010026343 | 0.586659847 | 0.23651777  |
| ENSGALG00010026344 | 0.915938387 | 0.366742801 |
| ENSGALG00010026345 | 0.298140893 | 0.421788492 |
| ENSGALG00010026346 | 0.995284848 | 0.323751682 |
| ENSGALG00010026350 | 0.107901641 | 0.015396987 |
| ENSGALG00010026352 | 0.972052807 | 0.351111119 |
| ENSGALG00010026353 | 0.178260204 | 0.199723546 |
| ENSGALG00010026354 | 0.903063055 | 0.355388785 |
| ENSGALG00010026355 | 0.989356761 | 0.356610423 |
| ENSGALG00010026356 | 0.463306883 | 0.178580614 |
| ENSGALG00010026360 | 0.753313329 | 0.056276536 |
| ENSGALG00010026361 | 0.016050289 | 0.159824694 |
| ENSGALG00010026362 | 0.051774122 | 0.211366192 |



|                    |             |             |
|--------------------|-------------|-------------|
| ENSGALG00010026363 | 0.216433634 | 0.680598293 |
| ENSGALG00010026365 | 0.255910915 | 0.217723976 |
| ENSGALG00010026366 | 0.889988379 | 0.383382225 |
| ENSGALG00010026367 | 0.814702142 | 0.07557615  |
| ENSGALG00010026368 | 0.106985859 | 0.466670428 |
| ENSGALG00010026369 | 0.884808621 | 0.123896494 |
| ENSGALG00010026371 | 0.663185263 | 0.381158278 |
| ENSGALG00010026372 | 0.381415582 | 0.158761082 |
| ENSGALG00010026375 | 0.775430391 | 0.404436746 |
| ENSGALG00010026376 | 0.286231124 | 0.564253946 |
| ENSGALG00010026377 | 0.5768335   | 0.127520542 |
| ENSGALG00010026381 | 0.027409972 | 0.251906952 |
| ENSGALG00010026382 | 0.60094183  | 0.229635484 |
| ENSGALG00010026385 | 0.589688307 | 0.137395849 |
| ENSGALG00010026387 | 0.434972361 | 0.277236379 |
| ENSGALG00010026388 | 0.971717877 | 0.285968324 |
| ENSGALG00010026391 | 0.337350312 | 0.486558046 |
| ENSGALG00010026393 | 0.427632194 | 0.130335722 |
| ENSGALG00010026395 | 0.265558089 | 0.028821141 |
| ENSGALG00010026402 | 0.988939261 | 0.310131774 |
| ENSGALG00010026403 | 0.982848555 | 0.293954926 |
| ENSGALG00010026407 | 0.44375007  | 0.033134044 |
| ENSGALG00010026409 | 0.949227515 | 0.208324683 |
| ENSGALG00010026410 | 0.890594557 | 0.3497538   |
| ENSGALG00010026415 | 0.140566953 | 0.087599282 |
| ENSGALG00010026416 | 0.044307996 | 0.132991646 |
| ENSGALG00010026420 | 0.148527247 | 0.406509534 |
| ENSGALG00010026421 | 0.314201399 | 0.242348686 |
| ENSGALG00010026422 | 0.814286106 | 0.345908826 |
| ENSGALG00010026423 | 0.592247103 | 0.149260289 |
| ENSGALG00010026424 | 0.027177818 | 0.116762193 |
| ENSGALG00010026425 | 0.82742789  | 0.311704954 |
| ENSGALG00010026426 | 0.018284215 | 0.551803092 |
| ENSGALG00010026427 | 0.699138204 | 0.154102787 |
| ENSGALG00010026431 | 0.225405672 | 0.042049997 |
| ENSGALG00010026433 | 0.048838644 | 0.138324083 |
| ENSGALG00010026434 | 0.951163863 | 0.27616691  |
| ENSGALG00010026436 | 0.932951949 | 0.278490115 |
| ENSGALG00010026438 | 0.967815292 | 0.354947697 |
| ENSGALG00010026439 | 0.350009831 | 0.150816787 |
| ENSGALG00010026442 | 0.264239718 | 0.073427965 |
| ENSGALG00010026443 | 0.978327261 | 0.368763936 |
| ENSGALG00010026448 | 0.793642624 | 0.019749406 |
| ENSGALG00010026450 | 0.348243575 | 0.14397611  |
| ENSGALG00010026453 | 0.306269874 | 0.488490028 |
| ENSGALG00010026456 | 0.457253341 | 0.217983055 |
| ENSGALG00010026457 | 0.547422609 | 0.076817887 |
| ENSGALG00010026458 | 0.931909647 | 0.360760386 |
| ENSGALG00010026459 | 0.744492135 | 0.264237256 |
| ENSGALG00010026461 | 0.347438992 | 0.106165656 |
| ENSGALG00010026463 | 0.200570274 | 0.091667991 |
| ENSGALG00010026464 | 0.862878031 | 0.055534287 |
| ENSGALG00010026465 | 0.123742382 | 0.213929497 |
| ENSGALG00010026466 | 0.868486978 | 0.228808269 |
| ENSGALG00010026467 | 0.592063798 | 0.293318199 |
| ENSGALG00010026469 | 0.133185764 | 0.334922938 |

|                    |             |             |
|--------------------|-------------|-------------|
| ENSGALG00010026470 | 0.904035533 | 0.391324171 |
| ENSGALG00010026472 | 0.545885614 | 0.104446966 |
| ENSGALG00010026474 | 0.245315472 | 0.062109122 |
| ENSGALG00010026478 | 0.391097471 | 0.144336359 |
| ENSGALG00010026480 | 0.946468928 | 0.269526519 |
| ENSGALG00010026481 | 0.671416234 | 0.21462929  |
| ENSGALG00010026483 | 0.256828349 | 0.119064955 |
| ENSGALG00010026484 | 0.514643593 | 0.292730282 |
| ENSGALG00010026485 | 0.986688258 | 0.343306577 |
| ENSGALG00010026487 | 0.101438177 | 0.236256937 |
| ENSGALG00010026488 | 0.33901797  | 0.388221913 |
| ENSGALG00010026490 | 0.216433634 | 0.680598293 |
| ENSGALG00010026492 | 0.865726529 | 0.174324169 |
| ENSGALG00010026493 | 0.099781655 | 0.015180604 |
| ENSGALG00010026494 | 0.409436305 | 0.178404713 |
| ENSGALG00010026495 | 0.635614611 | 0.279958864 |
| ENSGALG00010026498 | 0.291948523 | 0.142721471 |
| ENSGALG00010026500 | 0.45367877  | 0.273662537 |
| ENSGALG00010026502 | 0.06492309  | 0.207553562 |
| ENSGALG00010026503 | 0.217204044 | 0.138280225 |
| ENSGALG00010026506 | 0.242125662 | 0.515155453 |
| ENSGALG00010026507 | 0.585786249 | 0.113413787 |
| ENSGALG00010026508 | 0.681256891 | 0.428904824 |
| ENSGALG00010026510 | 0.09887047  | 0.238061524 |
| ENSGALG00010026514 | 0.500631287 | 0.434477371 |
| ENSGALG00010026516 | 0.639273076 | 0.00773297  |
| ENSGALG00010026521 | 0.200570274 | 0.091667991 |
| ENSGALG00010026522 | 0.947718142 | 0.405001504 |
| ENSGALG00010026523 | 0.36727005  | 0.486010284 |
| ENSGALG00010026524 | 0.035357573 | 0.073332577 |
| ENSGALG00010026526 | 0.470388556 | 0.132676015 |
| ENSGALG00010026527 | 0.349177561 | 0.31565517  |
| ENSGALG00010026529 | 0.01224994  | 0.401818935 |
| ENSGALG00010026532 | 0.92935542  | 0.306686805 |
| ENSGALG00010026534 | 0.850576667 | 0.119525817 |
| ENSGALG00010026536 | 0.928488066 | 0.283115712 |
| ENSGALG00010026537 | 0.629597693 | 0.078509287 |
| ENSGALG00010026538 | 0.169102026 | 0.231254333 |
| ENSGALG00010026539 | 0.888982786 | 0.327604864 |
| ENSGALG00010026541 | 0.286226772 | 0.009585674 |
| ENSGALG00010026542 | 0.469498937 | 0.01311824  |
| ENSGALG00010026543 | 0.050497546 | 0.174451807 |
| ENSGALG00010026544 | 0.675738065 | 0.235414759 |
| ENSGALG00010026545 | 0.959945141 | 0.362203136 |
| ENSGALG00010026546 | 0.394582412 | 0.053996367 |
| ENSGALG00010026549 | 0.467703276 | 0.197874296 |
| ENSGALG00010026550 | 0.952545283 | 0.293279521 |
| ENSGALG00010026553 | 0.928272873 | 0.192952984 |
| ENSGALG00010026555 | 0.942155365 | 0.284896139 |
| ENSGALG00010026558 | 0.202386985 | 0.179141798 |
| ENSGALG00010026559 | 0.030171494 | 0.375046429 |
| ENSGALG00010026560 | 0.750515917 | 0.064586994 |
| ENSGALG00010026562 | 0.94574881  | 0.14578227  |
| ENSGALG00010026563 | 0.12466491  | 0.04557714  |
| ENSGALG00010026564 | 0.676001734 | 0.257949011 |
| ENSGALG00010026565 | 0.12192239  | 0.168061017 |

|                    |             |             |
|--------------------|-------------|-------------|
| ENSGALG00010026566 | 0.958230498 | 0.245619621 |
| ENSGALG00010026567 | 0.140197935 | 0.154160862 |
| ENSGALG00010026568 | 0.918986326 | 0.242466673 |
| ENSGALG00010026569 | 0.192718436 | 0.363784003 |
| ENSGALG00010026572 | 0.204549963 | 0.089854095 |
| ENSGALG00010026573 | 0.061723759 | 0.209476687 |
| ENSGALG00010026575 | 0.959885694 | 0.319338762 |
| ENSGALG00010026576 | 0.177270153 | 0.317017532 |
| ENSGALG00010026577 | 0.208550923 | 0.676301294 |
| ENSGALG00010026578 | 0.881691158 | 0.283741789 |
| ENSGALG00010026580 | 0.430931775 | 0.218368361 |
| ENSGALG00010026581 | 0.288076026 | 0.149878403 |
| ENSGALG00010026583 | 0.687099515 | 0.179391419 |
| ENSGALG00010026584 | 0.942862743 | 0.266281961 |
| ENSGALG00010026585 | 0.527890335 | 0.170232821 |
| ENSGALG00010026586 | 0.047368886 | 0.202239219 |
| ENSGALG00010026587 | 0.264210299 | 0.781219858 |
| ENSGALG00010026588 | 0.960067607 | 0.253554998 |
| ENSGALG00010026590 | 0.796908771 | 0.380748616 |
| ENSGALG00010026591 | 0.021534578 | 0.056414416 |
| ENSGALG00010026592 | 0.561783509 | 0.089051534 |
| ENSGALG00010026593 | 0.411711016 | 0.426891687 |
| ENSGALG00010026595 | 0.971091577 | 0.306992993 |
| ENSGALG00010026596 | 0.769283925 | 0.315879234 |
| ENSGALG00010026597 | 0.352127931 | 0.305877975 |
| ENSGALG00010026600 | 0.122983455 | 0.091049012 |
| ENSGALG00010026601 | 0.992154522 | 0.320414224 |
| ENSGALG00010026602 | 0.103733265 | 0.216099768 |
| ENSGALG00010026603 | 0.548753735 | 0.241192955 |
| ENSGALG00010026604 | 0.043326458 | 0.15749233  |
| ENSGALG00010026605 | 0.795149731 | 0.077995436 |
| ENSGALG00010026607 | 0.541545868 | 0.033903869 |
| ENSGALG00010026608 | 0.571419124 | 0.054231907 |
| ENSGALG00010026609 | 0.694887908 | 0.097470167 |
| ENSGALG00010026610 | 0.72757015  | 0.248487591 |
| ENSGALG00010026611 | 0.872019729 | 0.426574557 |
| ENSGALG00010026612 | 0.91215214  | 0.447141624 |
| ENSGALG00010026613 | 0.492451889 | 0.15666988  |
| ENSGALG00010026614 | 0.235930578 | 0.458275173 |
| ENSGALG00010026615 | 0.67806841  | 0.047912239 |
| ENSGALG00010026616 | 0.264239718 | 0.073427965 |
| ENSGALG00010026617 | 0.248593158 | 0.148204836 |
| ENSGALG00010026618 | 0.535569679 | 0.199854117 |
| ENSGALG00010026619 | 0.266137114 | 0.107784983 |
| ENSGALG00010026620 | 0.189240572 | 0.04996112  |
| ENSGALG00010026621 | 0.882078413 | 0.335279908 |
| ENSGALG00010026622 | 0.738158832 | 0.503276596 |
| ENSGALG00010026623 | 0.765108698 | 0.301005883 |
| ENSGALG00010026625 | 0.927524157 | 0.18768831  |
| ENSGALG00010026626 | 0.192273128 | 0.478995801 |
| ENSGALG00010026628 | 0.971778443 | 0.376173348 |
| ENSGALG00010026629 | 0.928652008 | 0.152859515 |
| ENSGALG00010026630 | 0.962783942 | 0.307582    |
| ENSGALG00010026631 | 0.649899874 | 0.231027621 |
| ENSGALG00010026632 | 0.914323996 | 0.290931236 |
| ENSGALG00010026633 | 0.93460415  | 0.249209433 |

|                    |             |             |
|--------------------|-------------|-------------|
| ENSGALG00010026634 | 0.943579892 | 0.402184604 |
| ENSGALG00010026635 | 0.997272574 | 0.336828458 |
| ENSGALG00010026636 | 0.155959328 | 0.058280009 |
| ENSGALG00010026637 | 0.285586431 | 0.170268186 |
| ENSGALG00010026638 | 0.986909271 | 0.333870376 |
| ENSGALG00010026641 | 0.296587781 | 0.382880915 |
| ENSGALG00010026642 | 0.597271108 | 0.21030295  |
| ENSGALG00010026643 | 0.974468179 | 0.329239349 |
| ENSGALG00010026644 | 0.368476583 | 0.099553507 |
| ENSGALG00010026645 | 0.419647781 | 0.161476394 |
| ENSGALG00010026646 | 0.472380551 | 0.286466018 |
| ENSGALG00010026647 | 0.800804838 | 0.285961707 |
| ENSGALG00010026648 | 0.670201974 | 0.216954754 |
| ENSGALG00010026649 | 0.259881341 | 0.078034867 |
| ENSGALG00010026652 | 0.974827767 | 0.307125353 |
| ENSGALG00010026653 | 0.617476318 | 0.041897655 |
| ENSGALG00010026656 | 0.392408103 | 0.129411401 |
| ENSGALG00010026659 | 0.425382975 | 0.030313533 |
| ENSGALG00010026665 | 0.442030445 | 0.20194474  |
| ENSGALG00010026666 | 0.712163627 | 0.408576821 |
| ENSGALG00010026667 | 0.203991683 | 0.058221925 |
| ENSGALG00010026670 | 0.270451009 | 0.090541667 |
| ENSGALG00010026671 | 0.90040616  | 0.389074513 |
| ENSGALG00010026672 | 0.177664802 | 0.017311945 |
| ENSGALG00010026673 | 0.579216392 | 0.265524783 |
| ENSGALG00010026677 | 0.014586239 | 0.094444991 |
| ENSGALG00010026678 | 0.33777847  | 0.133444889 |
| ENSGALG00010026681 | 0.946013701 | 0.4098681   |
| ENSGALG00010026682 | 0.266137114 | 0.107784983 |
| ENSGALG00010026684 | 0.585311105 | 0.191509464 |
| ENSGALG00010026686 | 0.920673059 | 0.136323769 |
| ENSGALG00010026688 | 0.501146403 | 0.19894571  |
| ENSGALG00010026689 | 0.496532988 | 0.342585256 |
| ENSGALG00010026690 | 0.076517201 | 0.139714939 |
| ENSGALG00010026692 | 0.963850792 | 0.322250082 |
| ENSGALG00010026693 | 0.228227044 | 0.3004198   |
| ENSGALG00010026694 | 0.402394827 | 0.134676964 |
| ENSGALG00010026696 | 0.482682836 | 0.107496503 |
| ENSGALG00010026697 | 0.735504565 | 0.256788726 |
| ENSGALG00010026698 | 0.19882392  | 0.315375103 |
| ENSGALG00010026700 | 0.996983037 | 0.312213562 |
| ENSGALG00010026704 | 0.917888081 | 0.330447534 |
| ENSGALG00010026705 | 0.494403796 | 0.08868767  |
| ENSGALG00010026706 | 0.993637082 | 0.337330885 |
| ENSGALG00010026707 | 0.933112356 | 0.398843461 |
| ENSGALG00010026709 | 0.502503961 | 0.205675001 |
| ENSGALG00010026710 | 0.908066578 | 0.241335541 |
| ENSGALG00010026711 | 0.651584314 | 0.206026503 |
| ENSGALG00010026712 | 0.857384421 | 0.282635981 |
| ENSGALG00010026713 | 0.372757682 | 0.112441993 |
| ENSGALG00010026715 | 0.962748174 | 0.392950422 |
| ENSGALG00010026717 | 0.965857059 | 0.324957439 |
| ENSGALG00010026718 | 0.463412451 | 0.24596013  |
| ENSGALG00010026719 | 0.332420727 | 0.288957198 |
| ENSGALG00010026720 | 0.702620711 | 0.10414353  |
| ENSGALG00010026721 | 0.330422795 | 0.283359363 |

|                    |             |             |
|--------------------|-------------|-------------|
| ENSGALG00010026722 | 0.391896176 | 0.137012793 |
| ENSGALG00010026723 | 0.71015424  | 0.235019833 |
| ENSGALG00010026724 | 0.991158137 | 0.317095862 |
| ENSGALG00010026725 | 0.319198355 | 0.199400058 |
| ENSGALG00010026726 | 0.304868484 | 0.040509294 |
| ENSGALG00010026727 | 0.697890852 | 0.245090581 |
| ENSGALG00010026728 | 0.547603714 | 0.373398819 |
| ENSGALG00010026729 | 0.98712145  | 0.277711494 |
| ENSGALG00010026730 | 0.393547834 | 0.048755937 |
| ENSGALG00010026731 | 0.378549276 | 0.412504084 |
| ENSGALG00010026732 | 0.517452626 | 0.191158547 |
| ENSGALG00010026733 | 0.960308075 | 0.332845031 |
| ENSGALG00010026734 | 0.857419181 | 0.315534157 |
| ENSGALG00010026735 | 0.620487687 | 0.295395679 |
| ENSGALG00010026736 | 0.674207929 | 0.1899693   |
| ENSGALG00010026740 | 0.929630272 | 0.243598472 |
| ENSGALG00010026741 | 0.730224045 | 0.22587958  |
| ENSGALG00010026743 | 0.956953012 | 0.220178194 |
| ENSGALG00010026744 | 0.702311219 | 0.250019441 |
| ENSGALG00010026745 | 0.962319496 | 0.313160079 |
| ENSGALG00010026746 | 0.294688833 | 0.109855282 |
| ENSGALG00010026749 | 0.114880295 | 0.165755657 |
| ENSGALG00010026750 | 0.025967878 | 0.216501572 |
| ENSGALG00010026752 | 0.487001843 | 0.27960257  |
| ENSGALG00010026753 | 0.058070471 | 0.384313191 |
| ENSGALG00010026754 | 0.579240978 | 0.261945405 |
| ENSGALG00010026755 | 0.782950913 | 0.150102308 |
| ENSGALG00010026757 | 0.637177065 | 0.315588765 |
| ENSGALG00010026758 | 0.755865703 | 0.42644049  |
| ENSGALG00010026759 | 0.073522075 | 0.142530222 |
| ENSGALG00010026760 | 0.898046119 | 0.46496531  |
| ENSGALG00010026767 | 0.581109127 | 0.185720949 |
| ENSGALG00010026768 | 0.95167073  | 0.199620437 |
| ENSGALG00010026769 | 0.394327047 | 0.133628127 |
| ENSGALG00010026770 | 0.657820003 | 0.247292993 |
| ENSGALG00010026771 | 0.422421937 | 0.183824808 |
| ENSGALG00010026772 | 0.917550034 | 0.108262712 |
| ENSGALG00010026773 | 0.969613597 | 0.298673212 |
| ENSGALG00010026774 | 0.872362267 | 0.243876731 |
| ENSGALG00010026775 | 0.305263952 | 0.153708414 |
| ENSGALG00010026776 | 0.298469588 | 0.087870078 |
| ENSGALG00010026777 | 0.285272007 | 0.109169955 |
| ENSGALG00010026778 | 0.749036536 | 0.236719382 |
| ENSGALG00010026779 | 0.383880038 | 0.331887406 |
| ENSGALG00010026780 | 0.765818954 | 0.660851411 |
| ENSGALG00010026781 | 0.556926897 | 0.100490541 |
| ENSGALG00010026782 | 0.27184447  | 0.115107639 |
| ENSGALG00010026783 | 0.242655753 | 0.006005106 |
| ENSGALG00010026785 | 0.930191795 | 0.253345778 |
| ENSGALG00010026786 | 0.893555004 | 0.453728514 |
| ENSGALG00010026787 | 0.186557583 | 0.175131276 |
| ENSGALG00010026788 | 0.415243474 | 0.210776538 |
| ENSGALG00010026789 | 0.419622933 | 0.447331032 |
| ENSGALG00010026790 | 0.176238473 | 0.295157422 |
| ENSGALG00010026792 | 0.38480368  | 0.180523942 |
| ENSGALG00010026793 | 0.910737028 | 0.140987221 |

|                    |             |             |
|--------------------|-------------|-------------|
| ENSGALG00010026796 | 0.570418782 | 0.393876404 |
| ENSGALG00010026798 | 0.888393869 | 0.067772081 |
| ENSGALG00010026800 | 0.931355365 | 0.26811417  |
| ENSGALG00010026801 | 0.580948032 | 0.141395323 |
| ENSGALG00010026803 | 0.747324082 | 0.166555117 |
| ENSGALG00010026804 | 0.167743938 | 0.538865452 |
| ENSGALG00010026805 | 0.098858836 | 0.16668442  |
| ENSGALG00010026806 | 0.704014357 | 0.023337755 |
| ENSGALG00010026807 | 0.695065596 | 0.330268959 |
| ENSGALG00010026808 | 0.671388698 | 0.20316357  |
| ENSGALG00010026809 | 0.474942477 | 0.017340426 |
| ENSGALG00010026810 | 0.799412418 | 0.303091461 |
| ENSGALG00010026811 | 0.947752068 | 0.420063539 |
| ENSGALG00010026812 | 0.508128282 | 0.020505038 |
| ENSGALG00010026813 | 0.254086111 | 0.149558259 |
| ENSGALG00010026814 | 0.808517684 | 0.161099434 |
| ENSGALG00010026816 | 0.400778541 | 0.133797302 |
| ENSGALG00010026817 | 0.383929351 | 0.106068647 |
| ENSGALG00010026818 | 0.817580367 | 0.175877736 |
| ENSGALG00010026819 | 0.40785333  | 0.157127562 |
| ENSGALG00010026820 | 0.635640424 | 0.027981339 |
| ENSGALG00010026821 | 0.695019486 | 0.230817849 |
| ENSGALG00010026822 | 0.95514621  | 0.388443568 |
| ENSGALG00010026823 | 0.88087553  | 0.280976963 |
| ENSGALG00010026824 | 0.853486561 | 0.406687214 |
| ENSGALG00010026825 | 0.040499019 | 0.21226841  |
| ENSGALG00010026826 | 0.942329301 | 0.217460869 |
| ENSGALG00010026827 | 0.982377477 | 0.324198528 |
| ENSGALG00010026828 | 0.209971262 | 0.188326374 |
| ENSGALG00010026829 | 0.825220675 | 0.187611998 |
| ENSGALG00010026830 | 0.919713188 | 0.3125615   |
| ENSGALG00010026831 | 0.94070878  | 0.227686856 |
| ENSGALG00010026832 | 0.558304144 | 0.566446487 |
| ENSGALG00010026835 | 0.425802778 | 0.287336904 |
| ENSGALG00010026836 | 0.777880451 | 0.168399556 |
| ENSGALG00010026838 | 0.483989418 | 0.138186428 |
| ENSGALG00010026839 | 0.769105235 | 0.277779366 |
| ENSGALG00010026840 | 0.249357771 | 0.231293069 |
| ENSGALG00010026842 | 0.636911888 | 0.188463404 |
| ENSGALG00010026844 | 0.181452055 | 0.122872189 |
| ENSGALG00010026846 | 0.923200472 | 0.412534692 |
| ENSGALG00010026848 | 0.314676458 | 0.072548852 |
| ENSGALG00010026849 | 0.730319263 | 0.420569869 |
| ENSGALG00010026850 | 0.149638706 | 0.188230914 |
| ENSGALG00010026852 | 0.867879752 | 0.141296308 |
| ENSGALG00010026853 | 0.500698309 | 0.025371098 |
| ENSGALG00010026854 | 0.575462008 | 0.33806619  |
| ENSGALG00010026856 | 0.215362595 | 0.01063801  |
| ENSGALG00010026857 | 0.220163267 | 0.064584858 |
| ENSGALG00010026860 | 0.89619285  | 0.222873094 |
| ENSGALG00010026861 | 0.280448278 | 0.10678977  |
| ENSGALG00010026862 | 0.495916114 | 0.179082398 |
| ENSGALG00010026863 | 0.442333775 | 0.168954952 |
| ENSGALG00010026866 | 0.859295506 | 0.299211562 |
| ENSGALG00010026869 | 0.327597133 | 0.344787667 |
| ENSGALG00010026870 | 0.37430743  | 0.536491602 |

|                    |             |             |
|--------------------|-------------|-------------|
| ENSGALG00010026871 | 0.50038714  | 0.018586524 |
| ENSGALG00010026873 | 0.07822304  | 0.346011397 |
| ENSGALG00010026874 | 0.993837533 | 0.335135728 |
| ENSGALG00010026875 | 0.492153829 | 0.195633769 |
| ENSGALG00010026876 | 0.266137114 | 0.107784983 |
| ENSGALG00010026877 | 0.372044779 | 0.369275802 |
| ENSGALG00010026878 | 0.881827469 | 0.143841827 |
| ENSGALG00010026881 | 0.070756479 | 0.287651046 |
| ENSGALG00010026883 | 0.914987587 | 0.359253498 |
| ENSGALG00010026885 | 0.564250359 | 0.077207509 |
| ENSGALG00010026886 | 0.87474508  | 0.262534224 |
| ENSGALG00010026887 | 0.963699031 | 0.343447769 |
| ENSGALG00010026889 | 0.856386402 | 0.355737201 |
| ENSGALG00010026891 | 0.420272235 | 0.211221886 |
| ENSGALG00010026892 | 0.538634907 | 0.009014636 |
| ENSGALG00010026893 | 0.745964727 | 0.126261416 |
| ENSGALG00010026894 | 0.770494692 | 0.145570217 |
| ENSGALG00010026895 | 0.618687411 | 0.207380546 |
| ENSGALG00010026896 | 0.492471405 | 0.107463898 |
| ENSGALG00010026897 | 0.782378717 | 0.259880796 |
| ENSGALG00010026898 | 0.110197733 | 0.121304828 |
| ENSGALG00010026899 | 0.960038963 | 0.303387306 |
| ENSGALG00010026900 | 0.231754367 | 0.068663376 |
| ENSGALG00010026901 | 0.106667112 | 0.177206863 |
| ENSGALG00010026902 | 0.547676326 | 0.117813054 |
| ENSGALG00010026904 | 0.045894358 | 0.166606844 |
| ENSGALG00010026907 | 0.986765179 | 0.328333867 |
| ENSGALG00010026909 | 0.960061265 | 0.314181595 |
| ENSGALG00010026911 | 0.141927155 | 0.195577158 |
| ENSGALG00010026914 | 0.878095171 | 0.146061596 |
| ENSGALG00010026916 | 0.638399274 | 0.135267505 |
| ENSGALG00010026917 | 0.978754706 | 0.323002347 |
| ENSGALG00010026918 | 0.011730111 | 0.196288363 |
| ENSGALG00010026919 | 0.934031228 | 0.458954308 |
| ENSGALG00010026920 | 0.016788076 | 0.035497135 |
| ENSGALG00010026923 | 0.077588172 | 0.084507011 |
| ENSGALG00010026924 | 0.440259168 | 0.126461093 |
| ENSGALG00010026928 | 0.306552732 | 0.317176326 |
| ENSGALG00010026932 | 0.233126711 | 0.359820733 |
| ENSGALG00010026933 | 0.47448324  | 0.236886836 |
| ENSGALG00010026934 | 0.546168784 | 0.174358438 |
| ENSGALG00010026936 | 0.220465126 | 0.150205488 |
| ENSGALG00010026937 | 0.63842469  | 0.104047661 |
| ENSGALG00010026942 | 0.92500752  | 0.234607488 |
| ENSGALG00010026943 | 0.634039865 | 0.440409252 |
| ENSGALG00010026945 | 0.318283099 | 0.114521143 |
| ENSGALG00010026947 | 0.164579882 | 0.384164528 |
| ENSGALG00010026948 | 0.89934064  | 0.315978324 |
| ENSGALG00010026949 | 0.807143253 | 0.388697337 |
| ENSGALG00010026950 | 0.356272512 | 0.234220966 |
| ENSGALG00010026951 | 0.873681543 | 0.464510064 |
| ENSGALG00010026952 | 0.090074327 | 0.596986925 |
| ENSGALG00010026954 | 0.903971767 | 0.318300186 |
| ENSGALG00010026956 | 0.030637844 | 0.185580366 |
| ENSGALG00010026957 | 0.483761819 | 0.14768566  |
| ENSGALG00010026958 | 0.968111373 | 0.286301932 |

|                    |             |             |
|--------------------|-------------|-------------|
| ENSGALG00010026959 | 0.887802231 | 0.313286808 |
| ENSGALG00010026960 | 0.986507112 | 0.300218298 |
| ENSGALG00010026961 | 0.976506555 | 0.218681704 |
| ENSGALG00010026962 | 0.375886509 | 0.193891102 |
| ENSGALG00010026964 | 0.847829067 | 0.542200512 |
| ENSGALG00010026971 | 0.445792948 | 0.233733911 |
| ENSGALG00010026972 | 0.991120663 | 0.33025749  |
| ENSGALG00010026973 | 0.964182245 | 0.353980316 |
| ENSGALG00010026977 | 0.955333895 | 0.301405207 |
| ENSGALG00010026980 | 0.381354712 | 0.44489958  |
| ENSGALG00010026981 | 0.205002845 | 0.010871643 |
| ENSGALG00010026982 | 0.926187818 | 0.151782614 |
| ENSGALG00010026983 | 0.11186161  | 0.186699168 |
| ENSGALG00010026984 | 0.632162773 | 0.027483895 |
| ENSGALG00010026985 | 0.913913734 | 0.115390923 |
| ENSGALG00010026986 | 0.463830908 | 0.004747734 |
| ENSGALG00010026987 | 0.490239448 | 0.07557755  |
| ENSGALG00010026988 | 0.885329951 | 0.207810355 |
| ENSGALG00010026990 | 0.755018508 | 0.36545843  |
| ENSGALG00010026991 | 0.575961042 | 0.181484671 |
| ENSGALG00010026992 | 0.271701261 | 0.072417625 |
| ENSGALG00010026993 | 0.407858851 | 0.138056267 |
| ENSGALG00010026994 | 0.860571461 | 0.269406302 |
| ENSGALG00010026995 | 0.560368155 | 0.139608595 |
| ENSGALG00010026996 | 0.20304497  | 0.112778149 |
| ENSGALG00010026997 | 0.69017027  | 0.014393054 |
| ENSGALG00010026999 | 0.839074856 | 0.146714346 |
| ENSGALG00010027000 | 0.739711929 | 0.493977492 |
| ENSGALG00010027001 | 0.896916672 | 0.246508449 |
| ENSGALG00010027002 | 0.929583591 | 0.286541968 |
| ENSGALG00010027003 | 0.07367667  | 0.123663983 |
| ENSGALG00010027004 | 0.520109653 | 0.240348827 |
| ENSGALG00010027005 | 0.765317926 | 0.263042138 |
| ENSGALG00010027006 | 0.38632594  | 0.125435199 |
| ENSGALG00010027007 | 0.947631085 | 0.36805057  |
| ENSGALG00010027010 | 0.796983387 | 0.190918361 |
| ENSGALG00010027012 | 0.978860659 | 0.305971281 |
| ENSGALG00010027013 | 0.172459806 | 0.171048156 |
| ENSGALG00010027014 | 0.384831073 | 0.205747021 |
| ENSGALG00010027015 | 0.942524885 | 0.343034064 |
| ENSGALG00010027017 | 0.190942577 | 0.144175928 |
| ENSGALG00010027018 | 0.353350086 | 0.126267336 |
| ENSGALG00010027019 | 0.821874386 | 0.414022023 |
| ENSGALG00010027020 | 0.537660022 | 0.323504659 |
| ENSGALG00010027021 | 0.189240572 | 0.04996112  |
| ENSGALG00010027024 | 0.505229181 | 0.224186331 |
| ENSGALG00010027025 | 0.83234329  | 0.326040676 |
| ENSGALG00010027026 | 0.949775236 | 0.207930918 |
| ENSGALG00010027027 | 0.954781701 | 0.185475339 |
| ENSGALG00010027029 | 0.214951439 | 0.133553844 |
| ENSGALG00010027031 | 0.378863545 | 0.143149895 |
| ENSGALG00010027034 | 0.790058231 | 0.190050848 |
| ENSGALG00010027035 | 0.863543899 | 0.27062822  |
| ENSGALG00010027036 | 0.941498775 | 0.325031564 |
| ENSGALG00010027037 | 0.766880301 | 0.322522482 |
| ENSGALG00010027038 | 0.695991179 | 0.258960896 |



|                    |             |             |
|--------------------|-------------|-------------|
| ENSGALG00010027039 | 0.842015245 | 0.408462616 |
| ENSGALG00010027040 | 0.642563569 | 0.229034862 |
| ENSGALG00010027041 | 0.796474909 | 0.20255322  |
| ENSGALG00010027042 | 0.520094538 | 0.065343547 |
| ENSGALG00010027043 | 0.915821215 | 0.355106753 |
| ENSGALG00010027044 | 0.219476199 | 0.307031231 |
| ENSGALG00010027045 | 0.585110498 | 0.179664511 |
| ENSGALG00010027046 | 0.608113108 | 0.241513949 |
| ENSGALG00010027048 | 0.311289807 | 0.13851383  |
| ENSGALG00010027050 | 0.91830994  | 0.240479699 |
| ENSGALG00010027052 | 0.969449669 | 0.272125067 |
| ENSGALG00010027053 | 0.566669933 | 0.033554097 |
| ENSGALG00010027058 | 0.18738148  | 0.216898636 |
| ENSGALG00010027059 | 0.995718672 | 0.31096316  |
| ENSGALG00010027060 | 0.521632079 | 0.266201086 |
| ENSGALG00010027061 | 0.446045556 | 0.389506667 |
| ENSGALG00010027062 | 0.591760154 | 0.089453841 |
| ENSGALG00010027063 | 0.933465213 | 0.271146692 |
| ENSGALG00010027064 | 0.620738036 | 0.153109646 |
| ENSGALG00010027069 | 0.111962688 | 0.34922536  |
| ENSGALG00010027073 | 0.28363851  | 0.015327754 |
| ENSGALG00010027074 | 0.192824112 | 0.116792681 |
| ENSGALG00010027075 | 0.860305714 | 0.26873341  |
| ENSGALG00010027076 | 0.898466888 | 0.270158966 |
| ENSGALG00010027077 | 0.748988492 | 0.205916231 |
| ENSGALG00010027078 | 0.357038425 | 0.269925462 |
| ENSGALG00010027079 | 0.941625007 | 0.217587011 |
| ENSGALG00010027080 | 0.928574335 | 0.21834484  |
| ENSGALG00010027081 | 0.672314852 | 0.239075206 |
| ENSGALG00010027082 | 0.659288186 | 0.027652646 |
| ENSGALG00010027083 | 0.955916041 | 0.433789025 |
| ENSGALG00010027084 | 0.693851727 | 0.218742332 |
| ENSGALG00010027085 | 0.955147853 | 0.297599011 |
| ENSGALG00010027086 | 0.994136943 | 0.322925918 |
| ENSGALG00010027087 | 0.110965132 | 0.270342779 |
| ENSGALG00010027088 | 0.959632936 | 0.419848788 |
| ENSGALG00010027090 | 0.482405887 | 0.153626122 |
| ENSGALG00010027091 | 0.379263365 | 0.120316915 |
| ENSGALG00010027092 | 0.601079505 | 0.032336325 |
| ENSGALG00010027093 | 0.675416556 | 0.18884627  |
| ENSGALG00010027095 | 0.899046509 | 0.421982604 |
| ENSGALG00010027096 | 0.242332652 | 0.070038475 |
| ENSGALG00010027097 | 0.158159734 | 0.162855794 |
| ENSGALG00010027098 | 0.881311814 | 0.200533536 |
| ENSGALG00010027099 | 0.767485824 | 0.038732579 |
| ENSGALG00010027100 | 0.16925738  | 0.111584026 |
| ENSGALG00010027101 | 0.70406978  | 0.099825223 |
| ENSGALG00010027102 | 0.650144645 | 0.206408898 |
| ENSGALG00010027103 | 0.20620333  | 0.032178396 |
| ENSGALG00010027105 | 0.511632059 | 0.406425521 |
| ENSGALG00010027106 | 0.939019675 | 0.410403423 |
| ENSGALG00010027107 | 0.971633762 | 0.364614124 |
| ENSGALG00010027108 | 0.977935207 | 0.351158521 |
| ENSGALG00010027109 | 0.266655332 | 0.094010386 |
| ENSGALG00010027110 | 0.951167912 | 0.496403194 |
| ENSGALG00010027111 | 0.093778861 | 0.124676379 |

|                    |             |             |
|--------------------|-------------|-------------|
| ENSGALG00010027112 | 0.938974036 | 0.482067955 |
| ENSGALG00010027113 | 0.049346651 | 0.184181931 |
| ENSGALG00010027114 | 0.853333364 | 0.116925283 |
| ENSGALG00010027115 | 0.971976995 | 0.312533167 |
| ENSGALG00010027116 | 0.92096076  | 0.324472921 |
| ENSGALG00010027117 | 0.966639394 | 0.254966888 |
| ENSGALG00010027118 | 0.975949689 | 0.275950771 |
| ENSGALG00010027119 | 0.696524537 | 0.189723911 |
| ENSGALG00010027120 | 0.238868594 | 0.111653783 |
| ENSGALG00010027121 | 0.918853271 | 0.387401517 |
| ENSGALG00010027122 | 0.232399766 | 0.00713467  |
| ENSGALG00010027123 | 0.379463362 | 0.069734421 |
| ENSGALG00010027124 | 0.969485865 | 0.373262163 |
| ENSGALG00010027125 | 0.683259515 | 0.033804976 |
| ENSGALG00010027126 | 0.770136698 | 0.176961413 |
| ENSGALG00010027127 | 0.767337834 | 0.047482094 |
| ENSGALG00010027128 | 0.909287741 | 0.335560986 |
| ENSGALG00010027129 | 0.099427165 | 0.027145828 |
| ENSGALG00010027130 | 0.866163438 | 0.534705213 |
| ENSGALG00010027131 | 0.915284414 | 0.286590614 |
| ENSGALG00010027132 | 0.597749771 | 0.416389884 |
| ENSGALG00010027133 | 0.785091637 | 0.305895126 |
| ENSGALG00010027134 | 0.980436533 | 0.269505088 |
| ENSGALG00010027135 | 0.218919434 | 0.159605423 |
| ENSGALG00010027136 | 0.96983192  | 0.285378716 |
| ENSGALG00010027137 | 0.217786815 | 0.071107651 |
| ENSGALG00010027138 | 0.679718007 | 0.218586852 |
| ENSGALG00010027139 | 0.597752476 | 0.013705383 |
| ENSGALG00010027140 | 0.222326676 | 0.164988737 |
| ENSGALG00010027141 | 0.986543646 | 0.38138105  |
| ENSGALG00010027142 | 0.875910799 | 0.279658391 |
| ENSGALG00010027143 | 0.937037685 | 0.164725866 |
| ENSGALG00010027144 | 0.725574972 | 0.245275022 |
| ENSGALG00010027145 | 0.55782729  | 0.118090113 |
| ENSGALG00010027146 | 0.958745004 | 0.309692096 |
| ENSGALG00010027147 | 0.5135963   | 0.042814963 |
| ENSGALG00010027148 | 0.467765316 | 0.016217425 |
| ENSGALG00010027149 | 0.957232546 | 0.243284793 |
| ENSGALG00010027150 | 0.241523922 | 0.027277549 |
| ENSGALG00010027151 | 0.657200986 | 0.19579719  |
| ENSGALG00010027152 | 0.989343228 | 0.37128444  |
| ENSGALG00010027153 | 0.995429138 | 0.322530076 |
| ENSGALG00010027154 | 0.737910578 | 0.006268848 |
| ENSGALG00010027155 | 0.994604311 | 0.375367804 |
| ENSGALG00010027156 | 0.468027796 | 0.118920477 |
| ENSGALG00010027157 | 0.819278433 | 0.198517833 |
| ENSGALG00010027158 | 0.426591332 | 0.111779921 |
| ENSGALG00010027159 | 0.984725935 | 0.398104417 |
| ENSGALG00010027160 | 0.990477324 | 0.349826682 |
| ENSGALG00010027161 | 0.969897331 | 0.292439384 |
| ENSGALG00010027162 | 0.386696843 | 0.08099491  |
| ENSGALG00010027163 | 0.063740091 | 0.192177987 |
| ENSGALG00010027164 | 0.783089239 | 0.057703981 |
| ENSGALG00010027165 | 0.752696809 | 0.032118068 |
| ENSGALG00010027166 | 0.210174723 | 0.206154628 |
| ENSGALG00010027167 | 0.565893736 | 0.07375293  |

|                    |             |             |
|--------------------|-------------|-------------|
| ENSGALG00010027168 | 0.125884112 | 0.077725038 |
| ENSGALG00010027169 | 0.93219644  | 0.341474883 |
| ENSGALG00010027170 | 0.080180209 | 0.05477426  |
| ENSGALG00010027171 | 0.990034188 | 0.382681099 |
| ENSGALG00010027172 | 0.933774164 | 0.274332049 |
| ENSGALG00010027173 | 0.018805314 | 0.085603636 |
| ENSGALG00010027174 | 0.972561411 | 0.281405323 |
| ENSGALG00010027175 | 0.966909772 | 0.357410665 |
| ENSGALG00010027176 | 0.971656168 | 0.260999415 |
| ENSGALG00010027177 | 0.160877949 | 0.012318119 |
| ENSGALG00010027178 | 0.927029104 | 0.454931387 |
| ENSGALG00010027179 | 0.600625565 | 0.246696092 |
| ENSGALG00010027183 | 0.955372791 | 0.359160803 |
| ENSGALG00010027184 | 0.853455258 | 0.278849538 |
| ENSGALG00010027185 | 0.952487987 | 0.231760958 |
| ENSGALG00010027186 | 0.804606508 | 0.445874988 |
| ENSGALG00010027187 | 0.517084689 | 0.26196957  |
| ENSGALG00010027188 | 0.89736298  | 0.267738974 |
| ENSGALG00010027189 | 0.828823667 | 0.139772921 |
| ENSGALG00010027190 | 0.859470485 | 0.260792423 |
| ENSGALG00010027191 | 0.995168095 | 0.313774924 |
| ENSGALG00010027192 | 0.976663266 | 0.235070741 |
| ENSGALG00010027193 | 0.553235977 | 0.16485959  |
| ENSGALG00010027194 | 0.506957574 | 0.295483608 |
| ENSGALG00010027195 | 0.917789115 | 0.413500794 |
| ENSGALG00010027196 | 0.504046175 | 0.065820102 |
| ENSGALG00010027197 | 0.453854594 | 0.229154358 |
| ENSGALG00010027198 | 0.95938506  | 0.383157041 |
| ENSGALG00010027199 | 0.876771718 | 0.151854604 |
| ENSGALG00010027200 | 0.18859791  | 0.029612216 |
| ENSGALG00010027201 | 0.967080918 | 0.320830573 |
| ENSGALG00010027202 | 0.044515524 | 0.053162021 |
| ENSGALG00010027203 | 0.83176864  | 0.101679152 |
| ENSGALG00010027204 | 0.390968473 | 0.13262855  |
| ENSGALG00010027205 | 0.958473412 | 0.407076459 |
| ENSGALG00010027206 | 0.992772966 | 0.302278743 |
| ENSGALG00010027207 | 0.57790966  | 0.225170959 |
| ENSGALG00010027208 | 0.640245143 | 0.420868713 |
| ENSGALG00010027209 | 0.954691367 | 0.208486735 |
| ENSGALG00010027210 | 0.643765686 | 0.034479458 |
| ENSGALG00010027211 | 0.931510032 | 0.236255027 |
| ENSGALG00010027212 | 0.962591871 | 0.373927615 |
| ENSGALG00010027213 | 0.401033272 | 0.15803561  |
| ENSGALG00010027214 | 0.735629261 | 0.110036748 |
| ENSGALG00010027215 | 0.260735235 | 0.376001902 |
| ENSGALG00010027216 | 0.874392819 | 0.081148154 |
| ENSGALG00010027217 | 0.981173843 | 0.337790708 |
| ENSGALG00010027218 | 0.435857741 | 0.028303951 |
| ENSGALG00010027219 | 0.943294705 | 0.374172465 |
| ENSGALG00010027220 | 0.338652557 | 0.021050665 |
| ENSGALG00010027221 | 0.983446463 | 0.290100865 |
| ENSGALG00010027222 | 0.262121726 | 0.12896837  |
| ENSGALG00010027223 | 0.669555365 | 0.247175673 |
| ENSGALG00010027224 | 0.980620635 | 0.279302353 |
| ENSGALG00010027225 | 0.995321057 | 0.375328569 |
| ENSGALG00010027227 | 0.984856391 | 0.304381857 |

|                    |             |             |
|--------------------|-------------|-------------|
| ENSGALG00010027228 | 0.098683553 | 0.447716887 |
| ENSGALG00010027229 | 0.836031806 | 0.489533289 |
| ENSGALG00010027230 | 0.935981024 | 0.342476826 |
| ENSGALG00010027231 | 0.770258178 | 0.456778498 |
| ENSGALG00010027232 | 0.186024012 | 0.121599966 |
| ENSGALG00010027233 | 0.953569893 | 0.270255648 |
| ENSGALG00010027235 | 0.099329655 | 0.064271874 |
| ENSGALG00010027236 | 0.813092259 | 0.189958971 |
| ENSGALG00010027237 | 0.253191372 | 0.217417586 |
| ENSGALG00010027238 | 0.846040966 | 0.307334975 |
| ENSGALG00010027239 | 0.865369002 | 0.050014457 |
| ENSGALG00010027240 | 0.478028287 | 0.004726755 |
| ENSGALG00010027241 | 0.274150045 | 0.380501304 |
| ENSGALG00010027242 | 0.236765457 | 0.022484258 |
| ENSGALG00010027243 | 0.836113298 | 0.312385037 |
| ENSGALG00010027244 | 0.956937154 | 0.330047016 |
| ENSGALG00010027245 | 0.923948089 | 0.263509326 |
| ENSGALG00010027246 | 0.550070341 | 0.49046125  |
| ENSGALG00010027247 | 0.889369103 | 0.331772597 |
| ENSGALG00010027248 | 0.243609936 | 0.050093473 |
| ENSGALG00010027249 | 0.354775057 | 0.172857848 |
| ENSGALG00010027250 | 0.09740914  | 0.037187539 |
| ENSGALG00010027251 | 0.793979148 | 0.398699782 |
| ENSGALG00010027252 | 0.912380833 | 0.339247993 |
| ENSGALG00010027253 | 0.716987259 | 0.197474224 |
| ENSGALG00010027254 | 0.862279795 | 0.309597762 |
| ENSGALG00010027255 | 0.876590038 | 0.278955585 |
| ENSGALG00010027256 | 0.810953869 | 0.186359949 |
| ENSGALG00010027257 | 0.270989838 | 0.093392929 |
| ENSGALG00010027258 | 0.612662727 | 0.137504315 |
| ENSGALG00010027259 | 0.518606955 | 0.352260564 |
| ENSGALG00010027260 | 0.840459927 | 0.294454015 |
| ENSGALG00010027261 | 0.933361166 | 0.378166335 |
| ENSGALG00010027262 | 0.821699309 | 0.228181793 |
| ENSGALG00010027263 | 0.573375005 | 0.026948417 |
| ENSGALG00010027264 | 0.708898351 | 0.050003353 |
| ENSGALG00010027265 | 0.993346826 | 0.321720231 |
| ENSGALG00010027266 | 0.475612077 | 0.164386681 |
| ENSGALG00010027267 | 0.981927832 | 0.385501159 |
| ENSGALG00010027268 | 0.792668309 | 0.366598015 |
| ENSGALG00010027269 | 0.395848703 | 0.093633004 |
| ENSGALG00010027270 | 0.424780338 | 0.007323134 |
| ENSGALG00010027271 | 0.835825401 | 0.388984787 |
| ENSGALG00010027272 | 0.476775764 | 0.430090138 |
| ENSGALG00010027273 | 0.687875303 | 0.400484852 |
| ENSGALG00010027274 | 0.396697347 | 0.124692782 |
| ENSGALG00010027275 | 0.808496541 | 0.065158469 |
| ENSGALG00010027276 | 0.983225368 | 0.332715743 |
| ENSGALG00010027277 | 0.964872234 | 0.224606692 |
| ENSGALG00010027278 | 0.971294185 | 0.307303771 |
| ENSGALG00010027279 | 0.884552123 | 0.137304969 |
| ENSGALG00010027280 | 0.464609721 | 0.148847343 |
| ENSGALG00010027281 | 0.973096709 | 0.323122416 |
| ENSGALG00010027282 | 0.994765419 | 0.334669597 |
| ENSGALG00010027283 | 0.957219448 | 0.317966606 |
| ENSGALG00010027284 | 0.87430726  | 0.410425033 |

|                    |             |             |
|--------------------|-------------|-------------|
| ENSGALG00010027285 | 0.170354246 | 0.145765641 |
| ENSGALG00010027286 | 0.811207566 | 0.283562774 |
| ENSGALG00010027287 | 0.036506424 | 0.333028776 |
| ENSGALG00010027288 | 0.98523295  | 0.353029214 |
| ENSGALG00010027289 | 0.939347122 | 0.329845251 |
| ENSGALG00010027290 | 0.417114815 | 0.278041149 |
| ENSGALG00010027291 | 0.981515952 | 0.349584838 |
| ENSGALG00010027292 | 0.723871821 | 0.343506551 |
| ENSGALG00010027293 | 0.104977685 | 0.168858492 |
| ENSGALG00010027295 | 0.067445671 | 0.00099302  |
| ENSGALG00010027298 | 0.21983606  | 0.195833374 |
| ENSGALG00010027299 | 0.251460375 | 0.3281414   |
| ENSGALG00010027301 | 0.86215128  | 0.237091508 |
| ENSGALG00010027302 | 0.750820096 | 0.098691126 |
| ENSGALG00010027303 | 0.872373582 | 0.188549594 |
| ENSGALG00010027304 | 0.863164695 | 0.386126207 |
| ENSGALG00010027305 | 0.782327265 | 0.258565578 |
| ENSGALG00010027306 | 0.74124342  | 0.212010275 |
| ENSGALG00010027307 | 0.920701656 | 0.288808835 |
| ENSGALG00010027308 | 0.696083861 | 0.215373404 |
| ENSGALG00010027309 | 0.379253257 | 0.133484065 |
| ENSGALG00010027310 | 0.015770557 | 0.351965662 |
| ENSGALG00010027311 | 0.102373688 | 0.088541624 |
| ENSGALG00010027312 | 0.65626791  | 0.226291583 |
| ENSGALG00010027313 | 0.592939514 | 0.248444414 |
| ENSGALG00010027314 | 0.207566041 | 0.115866567 |
| ENSGALG00010027315 | 0.943230702 | 0.307220921 |
| ENSGALG00010027316 | 0.511151157 | 0.096564785 |
| ENSGALG00010027317 | 0.888257284 | 0.278894041 |
| ENSGALG00010027319 | 0.898661518 | 0.28501487  |
| ENSGALG00010027320 | 0.916896945 | 0.327824676 |
| ENSGALG00010027321 | 0.911638626 | 0.272529235 |
| ENSGALG00010027322 | 0.062591358 | 0.308974745 |
| ENSGALG00010027323 | 0.823677752 | 0.526544763 |
| ENSGALG00010027324 | 0.773648363 | 0.184509933 |
| ENSGALG00010027325 | 0.867875278 | 0.309461295 |
| ENSGALG00010027326 | 0.916084191 | 0.303926997 |
| ENSGALG00010027327 | 0.019822206 | 0.030899204 |
| ENSGALG00010027328 | 0.883212414 | 0.33497984  |
| ENSGALG00010027329 | 0.14395321  | 0.077863881 |
| ENSGALG00010027330 | 0.912682879 | 0.340202735 |
| ENSGALG00010027331 | 0.888870379 | 0.393537135 |
| ENSGALG00010027332 | 0.992088797 | 0.319082537 |
| ENSGALG00010027333 | 0.590010665 | 0.165968702 |
| ENSGALG00010027334 | 0.410049505 | 0.048390329 |
| ENSGALG00010027335 | 0.779499072 | 0.120784294 |
| ENSGALG00010027336 | 0.4596063   | 0.112804291 |
| ENSGALG00010027337 | 0.898842368 | 0.193336208 |
| ENSGALG00010027338 | 0.688952385 | 0.228997225 |
| ENSGALG00010027339 | 0.964848811 | 0.255441953 |
| ENSGALG00010027340 | 0.829565677 | 0.099542952 |
| ENSGALG00010027341 | 0.943040508 | 0.334050679 |
| ENSGALG00010027342 | 0.90619498  | 0.274187297 |
| ENSGALG00010027343 | 0.39902227  | 0.15681398  |
| ENSGALG00010027345 | 0.995315898 | 0.334314166 |
| ENSGALG00010027346 | 0.975590496 | 0.323795027 |

|                    |             |             |
|--------------------|-------------|-------------|
| ENSGALG00010027348 | 0.864060794 | 0.372153484 |
| ENSGALG00010027349 | 0.343869248 | 0.108583644 |
| ENSGALG00010027350 | 0.7613431   | 0.252829308 |
| ENSGALG00010027351 | 0.997173478 | 0.347834996 |
| ENSGALG00010027353 | 0.850563306 | 0.285919686 |
| ENSGALG00010027354 | 0.220818482 | 0.205768094 |
| ENSGALG00010027355 | 0.250650061 | 0.181903159 |
| ENSGALG00010027356 | 0.873283012 | 0.43357397  |
| ENSGALG00010027358 | 0.25507883  | 0.018812448 |
| ENSGALG00010027359 | 0.973024932 | 0.338748987 |
| ENSGALG00010027360 | 0.982100316 | 0.363955718 |
| ENSGALG00010027361 | 0.951242448 | 0.268108389 |
| ENSGALG00010027362 | 0.906732874 | 0.343796118 |
| ENSGALG00010027363 | 0.983056568 | 0.324529791 |
| ENSGALG00010027364 | 0.888997368 | 0.308317406 |
| ENSGALG00010027365 | 0.941380547 | 0.342563957 |
| ENSGALG00010027366 | 0.849417654 | 0.406028124 |
| ENSGALG00010027367 | 0.968857091 | 0.30562357  |
| ENSGALG00010027368 | 0.912960378 | 0.186117923 |
| ENSGALG00010027369 | 0.482375381 | 0.205016808 |
| ENSGALG00010027370 | 0.015605199 | 0.287868235 |
| ENSGALG00010027371 | 0.828348563 | 0.258662681 |
| ENSGALG00010027372 | 0.91397857  | 0.331438123 |
| ENSGALG00010027374 | 0.870316608 | 0.323321363 |
| ENSGALG00010027375 | 0.902566682 | 0.228504174 |
| ENSGALG00010027376 | 0.903523693 | 0.192692895 |
| ENSGALG00010027377 | 0.343963812 | 0.193657218 |
| ENSGALG00010027378 | 0.949465306 | 0.37237196  |
| ENSGALG00010027379 | 0.634621335 | 0.258867571 |
| ENSGALG00010027380 | 0.650547804 | 0.263040418 |
| ENSGALG00010027381 | 0.977758819 | 0.310978673 |
| ENSGALG00010027382 | 0.606661124 | 0.319458182 |
| ENSGALG00010027383 | 0.955807697 | 0.298315346 |
| ENSGALG00010027384 | 0.979101431 | 0.29956387  |
| ENSGALG00010027385 | 0.214586984 | 0.706975737 |
| ENSGALG00010027386 | 0.868335488 | 0.378094427 |
| ENSGALG00010027387 | 0.804346467 | 0.493400444 |
| ENSGALG00010027388 | 0.905654474 | 0.354417482 |
| ENSGALG00010027389 | 0.81033988  | 0.270978602 |
| ENSGALG00010027390 | 0.136624304 | 0.162266219 |
| ENSGALG00010027391 | 0.887360729 | 0.213567453 |
| ENSGALG00010027392 | 0.874672756 | 0.184560305 |
| ENSGALG00010027393 | 0.456444857 | 0.005070985 |
| ENSGALG00010027394 | 0.975195161 | 0.271782478 |
| ENSGALG00010027395 | 0.965386756 | 0.397067107 |
| ENSGALG00010027396 | 0.932462324 | 0.302171426 |
| ENSGALG00010027397 | 0.209367105 | 0.088230139 |
| ENSGALG00010027398 | 0.802082618 | 0.251403212 |
| ENSGALG00010027399 | 0.918176524 | 0.274527629 |
| ENSGALG00010027400 | 0.90998707  | 0.315840671 |
| ENSGALG00010027401 | 0.571502716 | 0.087120228 |
| ENSGALG00010027402 | 0.691180816 | 0.420734726 |
| ENSGALG00010027403 | 0.943490822 | 0.226555318 |
| ENSGALG00010027404 | 0.348392707 | 0.223347139 |
| ENSGALG00010027405 | 0.589633768 | 0.026422543 |
| ENSGALG00010027406 | 0.969845909 | 0.323687436 |

|                    |             |             |
|--------------------|-------------|-------------|
| ENSGALG00010027407 | 0.147441892 | 0.081240921 |
| ENSGALG00010027408 | 0.840288828 | 0.120542047 |
| ENSGALG00010027409 | 0.997117853 | 0.336142618 |
| ENSGALG00010027410 | 0.587397052 | 0.114686982 |
| ENSGALG00010027411 | 0.203374105 | 0.161442747 |
| ENSGALG00010027412 | 0.175114286 | 0.030075348 |
| ENSGALG00010027413 | 0.106557069 | 0.147443835 |
| ENSGALG00010027414 | 0.41673091  | 0.179938717 |
| ENSGALG00010027415 | 0.48236159  | 0.200526498 |
| ENSGALG00010027416 | 0.264239718 | 0.073427965 |
| ENSGALG00010027417 | 0.004290657 | 0.08735817  |
| ENSGALG00010027418 | 0.981783842 | 0.321320893 |
| ENSGALG00010027419 | 0.992626244 | 0.295756919 |
| ENSGALG00010027421 | 0.59754162  | 0.001825941 |
| ENSGALG00010027423 | 0.880822445 | 0.319467498 |
| ENSGALG00010027425 | 0.953901924 | 0.275380373 |
| ENSGALG00010027427 | 0.995162511 | 0.310020224 |
| ENSGALG00010027429 | 0.385953062 | 0.133261917 |
| ENSGALG00010027430 | 0.946055039 | 0.364061162 |
| ENSGALG00010027437 | 0.285272007 | 0.109169955 |
| ENSGALG00010027438 | 0.604303313 | 0.157418565 |
| ENSGALG00010027439 | 0.141921482 | 0.120746505 |
| ENSGALG00010027440 | 0.950705815 | 0.246189224 |
| ENSGALG00010027442 | 0.665801698 | 0.200317472 |
| ENSGALG00010027443 | 0.906687656 | 0.354471636 |
| ENSGALG00010027444 | 0.946908872 | 0.277802304 |
| ENSGALG00010027445 | 0.817884647 | 0.206727442 |
| ENSGALG00010027446 | 0.367937607 | 0.139259061 |
| ENSGALG00010027447 | 0.947808231 | 0.314480071 |
| ENSGALG00010027448 | 0.949486118 | 0.276479672 |
| ENSGALG00010027450 | 0.97661897  | 0.275992397 |
| ENSGALG00010027451 | 0.942114484 | 0.421759436 |
| ENSGALG00010027452 | 0.498363078 | 0.178723607 |
| ENSGALG00010027455 | 0.952002095 | 0.30288667  |
| ENSGALG00010027456 | 0.804537764 | 0.386097113 |
| ENSGALG00010027457 | 0.953273984 | 0.321733127 |
| ENSGALG00010027458 | 0.836112204 | 0.235340956 |
| ENSGALG00010027460 | 0.83954526  | 0.310217337 |
| ENSGALG00010027465 | 0.285272007 | 0.109169955 |
| ENSGALG00010027467 | 0.897849157 | 0.399203483 |
| ENSGALG00010027468 | 0.859579477 | 0.103115551 |
| ENSGALG00010027471 | 0.957064972 | 0.301321612 |
| ENSGALG00010027473 | 0.3043248   | 0.138242451 |
| ENSGALG00010027475 | 0.849846442 | 0.247295142 |
| ENSGALG00010027479 | 0.577970235 | 0.18535283  |
| ENSGALG00010027482 | 0.985691654 | 0.266665815 |
| ENSGALG00010027484 | 0.84596384  | 0.147155221 |
| ENSGALG00010027485 | 0.427571157 | 0.212401488 |
| ENSGALG00010027487 | 0.940526174 | 0.325086191 |
| ENSGALG00010027488 | 0.03966364  | 0.431234357 |
| ENSGALG00010027490 | 0.973545836 | 0.34721996  |
| ENSGALG00010027492 | 0.820562627 | 0.241314115 |
| ENSGALG00010027494 | 0.501872963 | 0.17834951  |
| ENSGALG00010027496 | 0.978458056 | 0.294404943 |
| ENSGALG00010027497 | 0.961642729 | 0.283738256 |
| ENSGALG00010027499 | 0.956127828 | 0.360336052 |

|                    |             |             |
|--------------------|-------------|-------------|
| ENSGALG00010027501 | 0.086039983 | 0.38613704  |
| ENSGALG00010027502 | 0.174789153 | 0.245336692 |
| ENSGALG00010027508 | 0.735472024 | 0.064804056 |
| ENSGALG00010027509 | 0.32650125  | 0.087795048 |
| ENSGALG00010027510 | 0.104429505 | 0.115460514 |
| ENSGALG00010027511 | 0.287939373 | 0.14004179  |
| ENSGALG00010027513 | 0.957882194 | 0.347017216 |
| ENSGALG00010027514 | 0.427961052 | 0.017589223 |
| ENSGALG00010027516 | 0.53347991  | 0.038325463 |
| ENSGALG00010027519 | 0.37189097  | 0.203344338 |
| ENSGALG00010027520 | 0.212962903 | 0.146646555 |
| ENSGALG00010027521 | 0.429649667 | 0.197737581 |
| ENSGALG00010027522 | 0.508969132 | 0.023987625 |
| ENSGALG00010027523 | 0.000700814 | 0.093369101 |
| ENSGALG00010027524 | 0.930935039 | 0.330126786 |
| ENSGALG00010027525 | 0.979094715 | 0.307558943 |
| ENSGALG00010027526 | 0.117359235 | 0.246998166 |
| ENSGALG00010027527 | 0.032047763 | 0.300258532 |
| ENSGALG00010027528 | 0.996545913 | 0.343909087 |
| ENSGALG00010027529 | 0.881370685 | 0.424940845 |
| ENSGALG00010027530 | 0.73035168  | 0.17770394  |
| ENSGALG00010027531 | 0.926657557 | 0.329123572 |
| ENSGALG00010027532 | 0.76889775  | 0.39549808  |
| ENSGALG00010027533 | 0.28278745  | 0.194921985 |
| ENSGALG00010027534 | 0.01062693  | 0.23176015  |
| ENSGALG00010027535 | 0.922288532 | 0.327172978 |
| ENSGALG00010027536 | 0.954328762 | 0.357080004 |
| ENSGALG00010027537 | 0.795687678 | 0.394229378 |
| ENSGALG00010027538 | 0.157585179 | 0.325083935 |
| ENSGALG00010027539 | 0.978753555 | 0.305773775 |
| ENSGALG00010027540 | 0.965130019 | 0.214910096 |
| ENSGALG00010027541 | 0.327157917 | 0.295427091 |
| ENSGALG00010027543 | 0.580507235 | 0.302293869 |
| ENSGALG00010027544 | 0.381352663 | 0.078374659 |
| ENSGALG00010027545 | 0.848397778 | 0.042766979 |
| ENSGALG00010027547 | 0.962802053 | 0.341663045 |
| ENSGALG00010027548 | 0.72258646  | 0.182989504 |
| ENSGALG00010027550 | 0.982128897 | 0.346425606 |
| ENSGALG00010027551 | 0.266137114 | 0.107784983 |
| ENSGALG00010027552 | 0.57901627  | 0.161917044 |
| ENSGALG00010027553 | 0.4385742   | 0.179389012 |
| ENSGALG00010027554 | 0.744482627 | 0.357791779 |
| ENSGALG00010027555 | 0.205614849 | 0.197314934 |
| ENSGALG00010027557 | 0.986664849 | 0.276385177 |
| ENSGALG00010027558 | 0.574744657 | 0.198171048 |
| ENSGALG00010027559 | 0.586069436 | 0.015848861 |
| ENSGALG00010027560 | 0.306259766 | 0.000467764 |
| ENSGALG00010027561 | 0.548073247 | 0.258119604 |
| ENSGALG00010027562 | 0.181593194 | 0.455162489 |
| ENSGALG00010027563 | 0.882121959 | 0.115883549 |
| ENSGALG00010027564 | 0.203991683 | 0.058221925 |
| ENSGALG00010027565 | 0.24866164  | 0.087370686 |
| ENSGALG00010027566 | 0.119246839 | 0.199824633 |
| ENSGALG00010027567 | 0.880941291 | 0.285871107 |
| ENSGALG00010027568 | 0.930762775 | 0.232272757 |
| ENSGALG00010027569 | 0.937486166 | 0.340208802 |



|                    |             |             |
|--------------------|-------------|-------------|
| ENSGALG00010027570 | 0.846571992 | 0.323424289 |
| ENSGALG00010027571 | 0.499632416 | 0.32599196  |
| ENSGALG00010027572 | 0.265558089 | 0.028821141 |
| ENSGALG00010027573 | 0.439899265 | 0.153465875 |
| ENSGALG00010027574 | 0.507566857 | 0.224266854 |
| ENSGALG00010027575 | 0.902141357 | 0.345372919 |
| ENSGALG00010027576 | 0.792798608 | 0.26796391  |
| ENSGALG00010027577 | 0.929488333 | 0.406413568 |
| ENSGALG00010027578 | 0.749755696 | 0.419184992 |
| ENSGALG00010027579 | 0.942818241 | 0.236776597 |
| ENSGALG00010027582 | 0.969592994 | 0.357801855 |
| ENSGALG00010027583 | 0.099997557 | 0.080800681 |
| ENSGALG00010027584 | 0.358566787 | 0.022041791 |
| ENSGALG00010027585 | 0.934429272 | 0.441306551 |
| ENSGALG00010027586 | 0.70794526  | 0.096293218 |
| ENSGALG00010027587 | 0.455302352 | 0.144545543 |
| ENSGALG00010027589 | 0.931818767 | 0.297792726 |
| ENSGALG00010027590 | 0.755947158 | 0.185129658 |
| ENSGALG00010027591 | 0.043070681 | 0.341217638 |
| ENSGALG00010027592 | 0.924119693 | 0.314145152 |
| ENSGALG00010027593 | 0.865892813 | 0.282826829 |
| ENSGALG00010027594 | 0.415098449 | 0.112543059 |
| ENSGALG00010027595 | 0.106346801 | 0.099646415 |
| ENSGALG00010027596 | 0.622314352 | 0.19748367  |
| ENSGALG00010027597 | 0.869141766 | 0.278977912 |
| ENSGALG00010027598 | 0.833157916 | 0.095375349 |
| ENSGALG00010027599 | 0.56828583  | 0.155197336 |
| ENSGALG00010027600 | 0.940237023 | 0.467909621 |
| ENSGALG00010027601 | 0.394065288 | 0.189158137 |
| ENSGALG00010027603 | 0.267108756 | 0.00253245  |
| ENSGALG00010027604 | 0.371009605 | 0.131442379 |
| ENSGALG00010027605 | 0.809257815 | 0.444778589 |
| ENSGALG00010027606 | 0.100997164 | 0.100050188 |
| ENSGALG00010027607 | 0.701855984 | 0.07791454  |
| ENSGALG00010027608 | 0.669373366 | 0.042440855 |
| ENSGALG00010027609 | 0.872869143 | 0.341564054 |
| ENSGALG00010027610 | 0.084026167 | 0.142254473 |
| ENSGALG00010027611 | 0.817127185 | 0.363399865 |
| ENSGALG00010027612 | 0.664008527 | 0.406713482 |
| ENSGALG00010027613 | 0.974004613 | 0.350385126 |
| ENSGALG00010027614 | 0.59677279  | 0.224999051 |
| ENSGALG00010027615 | 0.947223802 | 0.421988643 |
| ENSGALG00010027616 | 0.915695878 | 0.347046678 |
| ENSGALG00010027617 | 0.896809568 | 0.243289424 |
| ENSGALG00010027618 | 0.934286265 | 0.455573513 |
| ENSGALG00010027619 | 0.857258523 | 0.220595834 |
| ENSGALG00010027620 | 0.490375351 | 0.145312611 |
| ENSGALG00010027621 | 0.648538837 | 0.098540465 |
| ENSGALG00010027623 | 0.991693196 | 0.327940594 |
| ENSGALG00010027624 | 0.706700907 | 0.299967779 |
| ENSGALG00010027625 | 0.356803561 | 0.133583842 |
| ENSGALG00010027626 | 0.918391599 | 0.476930125 |
| ENSGALG00010027627 | 0.982320861 | 0.297036448 |
| ENSGALG00010027628 | 0.92554469  | 0.331105476 |
| ENSGALG00010027630 | 0.029548167 | 0.351637376 |
| ENSGALG00010027632 | 0.143761322 | 0.197372915 |

|                    |             |             |
|--------------------|-------------|-------------|
| ENSGALG00010027633 | 0.235630588 | 0.132393411 |
| ENSGALG00010027634 | 0.900892085 | 0.400738983 |
| ENSGALG00010027635 | 0.949008939 | 0.29225683  |
| ENSGALG00010027636 | 0.843803778 | 0.112044564 |
| ENSGALG00010027638 | 0.933561406 | 0.357830582 |
| ENSGALG00010027639 | 0.393172979 | 0.190906177 |
| ENSGALG00010027641 | 0.913089109 | 0.328031027 |
| ENSGALG00010027642 | 0.194229538 | 0.282535142 |
| ENSGALG00010027644 | 0.874664886 | 0.166346748 |
| ENSGALG00010027645 | 0.845572395 | 0.15855498  |
| ENSGALG00010027648 | 0.492996679 | 0.296109303 |
| ENSGALG00010027649 | 0.978832386 | 0.327653071 |
| ENSGALG00010027650 | 0.991833929 | 0.348325027 |
| ENSGALG00010027653 | 0.949698021 | 0.32755404  |
| ENSGALG00010027654 | 0.923593057 | 0.264359974 |
| ENSGALG00010027656 | 0.265558089 | 0.028821141 |
| ENSGALG00010027657 | 0.040432554 | 0.053381713 |
| ENSGALG00010027658 | 0.143167506 | 0.121789685 |
| ENSGALG00010027660 | 0.951908224 | 0.25622129  |
| ENSGALG00010027662 | 0.101113316 | 0.192317771 |
| ENSGALG00010027663 | 0.670479033 | 0.344550517 |
| ENSGALG00010027664 | 0.866574173 | 0.225371968 |
| ENSGALG00010027665 | 0.898552751 | 0.195787722 |
| ENSGALG00010027666 | 0.509209055 | 0.174704086 |
| ENSGALG00010027667 | 0.871479525 | 0.368553922 |
| ENSGALG00010027668 | 0.912254063 | 0.233748797 |
| ENSGALG00010027669 | 0.397377422 | 0.153175915 |
| ENSGALG00010027670 | 0.470730783 | 0.24369868  |
| ENSGALG00010027671 | 0.600870891 | 0.037970672 |
| ENSGALG00010027672 | 0.308445475 | 0.061167449 |
| ENSGALG00010027673 | 0.570625664 | 0.062485931 |
| ENSGALG00010027674 | 0.303247085 | 0.41322054  |
| ENSGALG00010027675 | 0.805867616 | 0.156208411 |
| ENSGALG00010027676 | 0.59822768  | 0.186897106 |
| ENSGALG00010027677 | 0.04158158  | 0.286470121 |
| ENSGALG00010027678 | 0.040848327 | 0.018271937 |
| ENSGALG00010027682 | 0.573281563 | 0.217712352 |
| ENSGALG00010027684 | 0.566202921 | 0.145654308 |
| ENSGALG00010027685 | 0.953511868 | 0.366886022 |
| ENSGALG00010027692 | 0.211882199 | 0.329278391 |
| ENSGALG00010027693 | 0.974261067 | 0.373256087 |
| ENSGALG00010027695 | 0.825965898 | 0.449090128 |
| ENSGALG00010027697 | 0.943282854 | 0.297944966 |
| ENSGALG00010027698 | 0.888440219 | 0.466161467 |
| ENSGALG00010027699 | 0.448997106 | 0.332276674 |
| ENSGALG00010027700 | 0.716204879 | 0.312748014 |
| ENSGALG00010027701 | 0.360419722 | 0.108643065 |
| ENSGALG00010027702 | 0.834663992 | 0.096370023 |
| ENSGALG00010027703 | 0.938336459 | 0.306462876 |
| ENSGALG00010027704 | 0.936919388 | 0.313258086 |
| ENSGALG00010027705 | 0.881625682 | 0.347760803 |
| ENSGALG00010027706 | 0.977078147 | 0.38404087  |
| ENSGALG00010027707 | 0.81604685  | 0.19600113  |
| ENSGALG00010027708 | 0.968194825 | 0.340685466 |
| ENSGALG00010027709 | 0.967473365 | 0.367306742 |
| ENSGALG00010027710 | 0.982399958 | 0.326319903 |

|                    |             |             |
|--------------------|-------------|-------------|
| ENSGALG00010027711 | 0.990430712 | 0.31651893  |
| ENSGALG00010027712 | 0.768774303 | 0.323704118 |
| ENSGALG00010027713 | 0.95691432  | 0.296983232 |
| ENSGALG00010027714 | 0.997016399 | 0.345954726 |
| ENSGALG00010027715 | 0.958357955 | 0.249423449 |
| ENSGALG00010027716 | 0.909201355 | 0.250037144 |
| ENSGALG00010027717 | 0.961513132 | 0.276929668 |
| ENSGALG00010027718 | 0.964800343 | 0.400411275 |
| ENSGALG00010027719 | 0.308096699 | 0.206514912 |
| ENSGALG00010027720 | 0.612185896 | 0.058162034 |
| ENSGALG00010027721 | 0.836153587 | 0.100779761 |
| ENSGALG00010027722 | 0.954650195 | 0.250133679 |
| ENSGALG00010027723 | 0.573096012 | 0.621055914 |
| ENSGALG00010027724 | 0.287251733 | 0.188756347 |
| ENSGALG00010027725 | 0.870356835 | 0.249465394 |
| ENSGALG00010027726 | 0.337546929 | 0.226422631 |
| ENSGALG00010027727 | 0.863421977 | 0.312923692 |
| ENSGALG00010027729 | 0.479533975 | 0.239974749 |
| ENSGALG00010027730 | 0.367279456 | 0.018476538 |
| ENSGALG00010027731 | 0.774928351 | 0.499782603 |
| ENSGALG00010027732 | 0.892086871 | 0.322388543 |
| ENSGALG00010027733 | 0.857077213 | 0.291603288 |
| ENSGALG00010027734 | 0.943879036 | 0.226026221 |
| ENSGALG00010027735 | 0.327648449 | 0.122209282 |
| ENSGALG00010027737 | 0.543058831 | 0.186462903 |
| ENSGALG00010027738 | 0.563142106 | 0.188517936 |
| ENSGALG00010027739 | 0.919858173 | 0.24738343  |
| ENSGALG00010027740 | 0.021901189 | 0.214789868 |
| ENSGALG00010027741 | 0.892983021 | 0.214731766 |
| ENSGALG00010027742 | 0.041111327 | 0.416080968 |
| ENSGALG00010027743 | 0.983069759 | 0.295799566 |
| ENSGALG00010027745 | 0.983172807 | 0.313440409 |
| ENSGALG00010027746 | 0.937048932 | 0.258602381 |
| ENSGALG00010027747 | 0.416630567 | 0.118574617 |
| ENSGALG00010027749 | 0.199173202 | 0.242170123 |
| ENSGALG00010027750 | 0.039562992 | 0.352215587 |
| ENSGALG00010027751 | 0.960132384 | 0.232840991 |
| ENSGALG00010027752 | 0.831370312 | 0.28434921  |
| ENSGALG00010027753 | 0.552408025 | 0.334425252 |
| ENSGALG00010027755 | 0.28880012  | 0.418789177 |
| ENSGALG00010027757 | 0.399426914 | 0.178230835 |
| ENSGALG00010027760 | 0.285272007 | 0.109169955 |
| ENSGALG00010027761 | 0.405430886 | 0.133933538 |
| ENSGALG00010027762 | 0.410509628 | 0.075378376 |
| ENSGALG00010027763 | 0.188457015 | 0.255709569 |
| ENSGALG00010027764 | 0.084003755 | 0.097042014 |
| ENSGALG00010027766 | 0.294193127 | 0.028634191 |
| ENSGALG00010027767 | 0.370747868 | 0.079551735 |
| ENSGALG00010027768 | 0.869041395 | 0.091010289 |
| ENSGALG00010027771 | 0.208685486 | 0.28183655  |
| ENSGALG00010027773 | 0.347170959 | 0.008041418 |
| ENSGALG00010027774 | 0.550540597 | 0.19826893  |
| ENSGALG00010027775 | 0.939337612 | 0.282733118 |
| ENSGALG00010027776 | 0.963142042 | 0.291489491 |
| ENSGALG00010027777 | 0.058556974 | 0.175380619 |
| ENSGALG00010027778 | 0.680910238 | 0.012039566 |

|                    |             |             |
|--------------------|-------------|-------------|
| ENSGALG00010027781 | 0.943591338 | 0.214037865 |
| ENSGALG00010027782 | 0.380172439 | 0.107848187 |
| ENSGALG00010027784 | 0.612941046 | 0.475862792 |
| ENSGALG00010027785 | 0.211318708 | 0.247254828 |
| ENSGALG00010027786 | 0.096552008 | 0.170527818 |
| ENSGALG00010027787 | 0.640486897 | 0.236476377 |
| ENSGALG00010027788 | 0.285272007 | 0.109169955 |
| ENSGALG00010027789 | 0.967010303 | 0.305937135 |
| ENSGALG00010027790 | 0.919789344 | 0.379820664 |
| ENSGALG00010027791 | 0.140881287 | 0.187713542 |
| ENSGALG00010027792 | 0.092853389 | 0.297573914 |
| ENSGALG00010027797 | 0.34812827  | 0.225215696 |
| ENSGALG00010027798 | 0.586758396 | 0.298237524 |
| ENSGALG00010027799 | 0.695845721 | 0.232330082 |
| ENSGALG00010027801 | 0.777891615 | 0.515580832 |
| ENSGALG00010027803 | 0.958414234 | 0.305365601 |
| ENSGALG00010027804 | 0.012433676 | 0.134633327 |
| ENSGALG00010027806 | 0.541923285 | 0.131629089 |
| ENSGALG00010027807 | 0.210073371 | 0.148173087 |
| ENSGALG00010027808 | 0.38480368  | 0.180523942 |
| ENSGALG00010027809 | 0.589106733 | 0.286402863 |
| ENSGALG00010027810 | 0.130338192 | 0.245298534 |
| ENSGALG00010027811 | 0.978218585 | 0.292182737 |
| ENSGALG00010027812 | 0.299847948 | 0.140446925 |
| ENSGALG00010027813 | 0.237809095 | 0.300688278 |
| ENSGALG00010027814 | 0.91820048  | 0.373071754 |
| ENSGALG00010027815 | 0.292709036 | 0.327963953 |
| ENSGALG00010027816 | 0.771181319 | 0.217385567 |
| ENSGALG00010027818 | 0.200570274 | 0.091667991 |
| ENSGALG00010027819 | 0.276757289 | 0.268822049 |
| ENSGALG00010027820 | 0.383562316 | 0.07752016  |
| ENSGALG00010027821 | 0.979676956 | 0.369014162 |
| ENSGALG00010027822 | 0.960353243 | 0.25107578  |
| ENSGALG00010027824 | 0.884681756 | 0.329133544 |
| ENSGALG00010027825 | 0.768835864 | 0.424094847 |
| ENSGALG00010027826 | 0.924742383 | 0.270563297 |
| ENSGALG00010027827 | 0.71805029  | 0.203558695 |
| ENSGALG00010027829 | 0.967752845 | 0.384160912 |
| ENSGALG00010027830 | 0.890213231 | 0.313610921 |
| ENSGALG00010027831 | 0.961637058 | 0.38376708  |
| ENSGALG00010027833 | 0.011292696 | 0.05037781  |
| ENSGALG00010027834 | 0.950255114 | 0.326024641 |
| ENSGALG00010027835 | 0.354612028 | 0.410667109 |
| ENSGALG00010027836 | 0.749740794 | 0.103909624 |
| ENSGALG00010027837 | 0.222393692 | 0.167305868 |
| ENSGALG00010027838 | 0.9218141   | 0.20275979  |
| ENSGALG00010027839 | 0.635119414 | 0.187980408 |
| ENSGALG00010027841 | 0.888396384 | 0.374062279 |
| ENSGALG00010027842 | 0.507989482 | 0.360747869 |
| ENSGALG00010027844 | 0.156244913 | 0.107042072 |
| ENSGALG00010027845 | 0.601887444 | 0.407056354 |
| ENSGALG00010027847 | 0.824036526 | 0.525810791 |
| ENSGALG00010027851 | 0.208550923 | 0.676301294 |
| ENSGALG00010027854 | 0.34156832  | 0.078045473 |
| ENSGALG00010027855 | 0.249075056 | 0.249313821 |
| ENSGALG00010027856 | 0.486419223 | 0.143168371 |

|                    |             |             |
|--------------------|-------------|-------------|
| ENSGALG00010027857 | 0.34608874  | 0.077180519 |
| ENSGALG00010027860 | 0.766725669 | 0.497002004 |
| ENSGALG00010027861 | 0.05551787  | 0.163912731 |
| ENSGALG00010027862 | 0.873302101 | 0.224925461 |
| ENSGALG00010027863 | 0.977133349 | 0.299538255 |
| ENSGALG00010027864 | 0.826418521 | 0.263131805 |
| ENSGALG00010027865 | 0.791946254 | 0.160253292 |
| ENSGALG00010027866 | 0.477938861 | 0.471203489 |
| ENSGALG00010027867 | 0.860922693 | 0.407692714 |
| ENSGALG00010027868 | 0.216433634 | 0.680598293 |
| ENSGALG00010027869 | 0.708664859 | 0.231550135 |
| ENSGALG00010027870 | 0.988299734 | 0.339861339 |
| ENSGALG00010027872 | 0.8011377   | 0.233885809 |
| ENSGALG00010027873 | 0.17838717  | 0.164539164 |
| ENSGALG00010027874 | 0.61643466  | 0.123922025 |
| ENSGALG00010027875 | 0.900332636 | 0.411154019 |
| ENSGALG00010027876 | 0.390785544 | 0.021697962 |
| ENSGALG00010027877 | 0.651715614 | 0.242954885 |
| ENSGALG00010027878 | 0.12305961  | 0.187427303 |
| ENSGALG00010027879 | 0.969378774 | 0.310198663 |
| ENSGALG00010027880 | 0.969262576 | 0.301184856 |
| ENSGALG00010027881 | 0.768951637 | 0.291536768 |
| ENSGALG00010027882 | 0.962855204 | 0.339095759 |
| ENSGALG00010027883 | 0.783474408 | 0.355975677 |
| ENSGALG00010027884 | 0.806169129 | 0.187023244 |
| ENSGALG00010027885 | 0.954006102 | 0.32778919  |
| ENSGALG00010027886 | 0.804889489 | 0.413428069 |
| ENSGALG00010027887 | 0.490561027 | 0.208223985 |
| ENSGALG00010027888 | 0.86566571  | 0.373693331 |
| ENSGALG00010027889 | 0.809686329 | 0.3567007   |
| ENSGALG00010027890 | 0.793480855 | 0.394502713 |
| ENSGALG00010027891 | 0.639630538 | 0.016481666 |
| ENSGALG00010027892 | 0.018276013 | 0.250391033 |
| ENSGALG00010027893 | 0.828675731 | 0.193306945 |
| ENSGALG00010027894 | 0.78544965  | 0.222931805 |
| ENSGALG00010027895 | 0.904262128 | 0.407029509 |
| ENSGALG00010027896 | 0.97215516  | 0.201172636 |
| ENSGALG00010027897 | 0.78624664  | 0.275493523 |
| ENSGALG00010027898 | 0.854437628 | 0.549761491 |
| ENSGALG00010027899 | 0.832592941 | 0.329226147 |
| ENSGALG00010027900 | 0.985862893 | 0.274140174 |
| ENSGALG00010027901 | 0.828057865 | 0.124369428 |
| ENSGALG00010027902 | 0.837245212 | 0.226966386 |
| ENSGALG00010027903 | 0.903776698 | 0.341075048 |
| ENSGALG00010027904 | 0.722813866 | 0.378436968 |
| ENSGALG00010027905 | 0.250329824 | 0.018573168 |
| ENSGALG00010027906 | 0.952406078 | 0.357282364 |
| ENSGALG00010027907 | 0.992026518 | 0.317799095 |
| ENSGALG00010027908 | 0.968449283 | 0.339400791 |
| ENSGALG00010027909 | 0.691976352 | 0.094312341 |
| ENSGALG00010027910 | 0.006226029 | 0.262741413 |
| ENSGALG00010027911 | 0.915121699 | 0.258310589 |
| ENSGALG00010027912 | 0.4936239   | 0.398267853 |
| ENSGALG00010027913 | 0.533493931 | 0.099499711 |
| ENSGALG00010027914 | 0.974116727 | 0.29360225  |
| ENSGALG00010027915 | 0.204556209 | 0.071256561 |

|                    |             |             |
|--------------------|-------------|-------------|
| ENSGALG00010027916 | 0.86143543  | 0.234874196 |
| ENSGALG00010027917 | 0.917773924 | 0.261116626 |
| ENSGALG00010027918 | 0.977567631 | 0.34856789  |
| ENSGALG00010027919 | 0.876753513 | 0.281049537 |
| ENSGALG00010027920 | 0.751680243 | 0.177820533 |
| ENSGALG00010027921 | 0.7675496   | 0.241180735 |
| ENSGALG00010027922 | 0.121346884 | 0.231968526 |
| ENSGALG00010027923 | 0.94266326  | 0.197522003 |
| ENSGALG00010027924 | 0.920184545 | 0.392673156 |
| ENSGALG00010027925 | 0.746553643 | 0.159637869 |
| ENSGALG00010027926 | 0.418582331 | 0.182800994 |
| ENSGALG00010027927 | 0.991842681 | 0.338443282 |
| ENSGALG00010027928 | 0.427723161 | 0.152431441 |
| ENSGALG00010027929 | 0.422184508 | 0.168783767 |
| ENSGALG00010027930 | 0.985590979 | 0.286373296 |
| ENSGALG00010027931 | 0.991659978 | 0.345268049 |
| ENSGALG00010027932 | 0.892738624 | 0.20293662  |
| ENSGALG00010027933 | 0.637942814 | 0.504347223 |
| ENSGALG00010027934 | 0.908531127 | 0.345598751 |
| ENSGALG00010027935 | 0.530090258 | 0.217974375 |
| ENSGALG00010027936 | 0.809663338 | 0.319812283 |
| ENSGALG00010027937 | 0.494424598 | 0.11827745  |
| ENSGALG00010027938 | 0.851013265 | 0.40054003  |
| ENSGALG00010027939 | 0.826565432 | 0.185642909 |
| ENSGALG00010027940 | 0.861766563 | 0.069633464 |
| ENSGALG00010027941 | 0.074160509 | 0.204569886 |
| ENSGALG00010027942 | 0.500070257 | 0.211469438 |
| ENSGALG00010027943 | 0.988871207 | 0.340736349 |
| ENSGALG00010027944 | 0.722522172 | 0.175527126 |
| ENSGALG00010027946 | 0.179126645 | 0.381609164 |
| ENSGALG00010027947 | 0.861326966 | 0.397382879 |
| ENSGALG00010027948 | 0.870540291 | 0.271511389 |
| ENSGALG00010027949 | 0.54335597  | 0.155217282 |
| ENSGALG00010027950 | 0.958624489 | 0.29034508  |
| ENSGALG00010027951 | 0.799186891 | 0.306930076 |
| ENSGALG00010027952 | 0.907356032 | 0.146018758 |
| ENSGALG00010027953 | 0.986792862 | 0.246607177 |
| ENSGALG00010027954 | 0.938081162 | 0.411184831 |
| ENSGALG00010027955 | 0.848476    | 0.360028122 |
| ENSGALG00010027956 | 0.986117527 | 0.282315065 |
| ENSGALG00010027957 | 0.044602121 | 0.233381933 |
| ENSGALG00010027958 | 0.853578103 | 0.306715845 |
| ENSGALG00010027959 | 0.059652645 | 0.261265823 |
| ENSGALG00010027960 | 0.877321349 | 0.34615161  |
| ENSGALG00010027961 | 0.605510821 | 0.177294406 |
| ENSGALG00010027962 | 0.926636825 | 0.350522491 |
| ENSGALG00010027964 | 0.927132315 | 0.317447616 |
| ENSGALG00010027965 | 0.948538641 | 0.422359318 |
| ENSGALG00010027966 | 0.60014083  | 0.096182301 |
| ENSGALG00010027968 | 0.927350372 | 0.484463056 |
| ENSGALG00010027969 | 0.911677962 | 0.292776168 |
| ENSGALG00010027970 | 0.838068253 | 0.141894378 |
| ENSGALG00010027971 | 0.681050715 | 0.515519332 |
| ENSGALG00010027972 | 0.151264133 | 0.0303821   |
| ENSGALG00010027973 | 0.659041381 | 0.452683621 |
| ENSGALG00010027974 | 0.697805349 | 0.363782812 |

|                    |             |             |
|--------------------|-------------|-------------|
| ENSGALG00010027975 | 0.974761718 | 0.258408486 |
| ENSGALG00010027976 | 0.630777234 | 0.382104906 |
| ENSGALG00010027977 | 0.981326414 | 0.39872327  |
| ENSGALG00010027979 | 0.776593307 | 0.2923142   |
| ENSGALG00010027980 | 0.960100574 | 0.319635804 |
| ENSGALG00010027981 | 0.856711768 | 0.091168862 |
| ENSGALG00010027982 | 0.759239156 | 0.376444782 |
| ENSGALG00010027983 | 0.873269456 | 0.326985134 |
| ENSGALG00010027984 | 0.909543409 | 0.352862712 |
| ENSGALG00010027985 | 0.968854513 | 0.335392014 |
| ENSGALG00010027986 | 0.958330493 | 0.309861378 |
| ENSGALG00010027987 | 0.416182109 | 0.168190418 |
| ENSGALG00010027988 | 0.345776417 | 0.207947535 |
| ENSGALG00010027989 | 0.53259045  | 0.25240673  |
| ENSGALG00010027990 | 0.867875843 | 0.224178074 |
| ENSGALG00010027991 | 0.408735413 | 0.237258012 |
| ENSGALG00010027993 | 0.782214684 | 0.357875878 |
| ENSGALG00010027994 | 0.006297287 | 0.466792324 |
| ENSGALG00010027995 | 0.387857269 | 0.098722115 |
| ENSGALG00010027996 | 0.891356629 | 0.260885249 |
| ENSGALG00010027997 | 0.361444391 | 0.09663825  |
| ENSGALG00010027998 | 0.991190369 | 0.350223263 |
| ENSGALG00010027999 | 0.186336073 | 0.186221145 |
| ENSGALG00010028000 | 0.982738541 | 0.314925882 |
| ENSGALG00010028001 | 0.949396272 | 0.342820369 |
| ENSGALG00010028002 | 0.448248202 | 0.13158303  |
| ENSGALG00010028004 | 0.850342042 | 0.373072828 |
| ENSGALG00010028005 | 0.975296179 | 0.309237314 |
| ENSGALG00010028006 | 0.543931112 | 0.254682888 |
| ENSGALG00010028007 | 0.911404866 | 0.233287762 |
| ENSGALG00010028008 | 0.975060978 | 0.344839458 |
| ENSGALG00010028009 | 0.95213814  | 0.316961303 |
| ENSGALG00010028010 | 0.702302852 | 0.35670526  |
| ENSGALG00010028011 | 0.376956865 | 0.079022251 |
| ENSGALG00010028012 | 0.729742595 | 0.374264265 |
| ENSGALG00010028013 | 0.982677003 | 0.309318955 |
| ENSGALG00010028014 | 0.16840497  | 0.108071966 |
| ENSGALG00010028015 | 0.97384841  | 0.272320284 |
| ENSGALG00010028016 | 0.861587925 | 0.291385633 |
| ENSGALG00010028017 | 0.649055997 | 0.403801177 |
| ENSGALG00010028019 | 0.961342552 | 0.307323205 |
| ENSGALG00010028020 | 0.588580492 | 0.322746844 |
| ENSGALG00010028021 | 0.980194721 | 0.297832345 |
| ENSGALG00010028022 | 0.659161713 | 0.083747521 |
| ENSGALG00010028023 | 0.304058409 | 0.967808645 |
| ENSGALG00010028024 | 0.879401055 | 0.281753495 |
| ENSGALG00010028025 | 0.991222954 | 0.311363977 |
| ENSGALG00010028026 | 0.108320634 | 0.034270087 |
| ENSGALG00010028027 | 0.172709069 | 0.130692177 |
| ENSGALG00010028028 | 0.913993945 | 0.406786299 |
| ENSGALG00010028029 | 0.477386554 | 0.240567571 |
| ENSGALG00010028030 | 0.158507398 | 0.282957871 |
| ENSGALG00010028031 | 0.322587846 | 0.104186967 |
| ENSGALG00010028032 | 0.827934194 | 0.206770762 |
| ENSGALG00010028033 | 0.419651701 | 0.182461132 |
| ENSGALG00010028034 | 0.791239597 | 0.314743495 |

|                    |             |             |
|--------------------|-------------|-------------|
| ENSGALG00010028035 | 0.179171407 | 0.246488957 |
| ENSGALG00010028036 | 0.945383872 | 0.343668477 |
| ENSGALG00010028037 | 0.849165445 | 0.224605964 |
| ENSGALG00010028038 | 0.01417792  | 0.172123804 |
| ENSGALG00010028039 | 0.972855518 | 0.292332095 |
| ENSGALG00010028040 | 0.934176967 | 0.15753134  |
| ENSGALG00010028041 | 0.492697196 | 0.305275753 |
| ENSGALG00010028042 | 0.534267653 | 0.02428475  |
| ENSGALG00010028043 | 0.901711451 | 0.247296632 |
| ENSGALG00010028044 | 0.017230816 | 0.102968279 |
| ENSGALG00010028045 | 0.56497305  | 0.036845467 |
| ENSGALG00010028046 | 0.920546623 | 0.364697512 |
| ENSGALG00010028047 | 0.016243446 | 0.057520701 |
| ENSGALG00010028048 | 0.91062255  | 0.351667646 |
| ENSGALG00010028049 | 0.963452289 | 0.31893964  |
| ENSGALG00010028050 | 0.852718785 | 0.380247291 |
| ENSGALG00010028051 | 0.699393136 | 0.237781055 |
| ENSGALG00010028052 | 0.740759973 | 0.546324371 |
| ENSGALG00010028053 | 0.995880482 | 0.337974263 |
| ENSGALG00010028054 | 0.889647012 | 0.275821473 |
| ENSGALG00010028055 | 0.186894171 | 0.217495048 |
| ENSGALG00010028056 | 0.934389771 | 0.275410129 |
| ENSGALG00010028057 | 0.408721057 | 0.019695582 |
| ENSGALG00010028058 | 0.899844628 | 0.179924334 |
| ENSGALG00010028059 | 0.607347395 | 0.175057512 |
| ENSGALG00010028060 | 0.89066886  | 0.38421711  |
| ENSGALG00010028061 | 0.67590401  | 0.362507023 |
| ENSGALG00010028062 | 0.34279423  | 0.134133055 |
| ENSGALG00010028064 | 0.244701234 | 0.16673831  |
| ENSGALG00010028065 | 0.835646055 | 0.215994113 |
| ENSGALG00010028066 | 0.962013354 | 0.230341263 |
| ENSGALG00010028067 | 0.919289568 | 0.188386328 |
| ENSGALG00010028068 | 0.872009998 | 0.249569054 |
| ENSGALG00010028069 | 0.29932927  | 0.180646537 |
| ENSGALG00010028070 | 0.837722559 | 0.323055981 |
| ENSGALG00010028071 | 0.906163213 | 0.097897742 |
| ENSGALG00010028072 | 0.705713797 | 0.215542292 |
| ENSGALG00010028073 | 0.989894394 | 0.364524542 |
| ENSGALG00010028074 | 0.903453221 | 0.181026621 |
| ENSGALG00010028075 | 0.964995762 | 0.335123876 |
| ENSGALG00010028076 | 0.982663318 | 0.329147793 |
| ENSGALG00010028077 | 0.365894691 | 0.232214944 |
| ENSGALG00010028078 | 0.82395818  | 0.253886612 |
| ENSGALG00010028079 | 0.99044456  | 0.283934478 |
| ENSGALG00010028080 | 0.934703617 | 0.381541825 |
| ENSGALG00010028081 | 0.798227271 | 0.24550553  |
| ENSGALG00010028082 | 0.996367332 | 0.335278693 |
| ENSGALG00010028083 | 0.121990842 | 0.189637871 |
| ENSGALG00010028084 | 0.737669545 | 0.031347261 |
| ENSGALG00010028085 | 0.701501203 | 0.192234501 |
| ENSGALG00010028086 | 0.879184692 | 0.385463875 |
| ENSGALG00010028087 | 0.992568801 | 0.270006268 |
| ENSGALG00010028088 | 0.959792598 | 0.37113636  |
| ENSGALG00010028089 | 0.415286156 | 0.321052467 |
| ENSGALG00010028090 | 0.936208123 | 0.281589895 |
| ENSGALG00010028091 | 0.942130638 | 0.243697751 |



|                    |             |             |
|--------------------|-------------|-------------|
| ENSGALG00010028092 | 0.394015974 | 0.103970839 |
| ENSGALG00010028093 | 0.900811519 | 0.415969639 |
| ENSGALG00010028094 | 0.46399919  | 0.320225977 |
| ENSGALG00010028095 | 0.38250133  | 0.114283922 |
| ENSGALG00010028096 | 0.955399844 | 0.264260787 |
| ENSGALG00010028097 | 0.960654121 | 0.402439912 |
| ENSGALG00010028098 | 0.70971105  | 0.263952961 |
| ENSGALG00010028099 | 0.861776014 | 0.211838659 |
| ENSGALG00010028100 | 0.233503217 | 0.025146126 |
| ENSGALG00010028101 | 0.961168043 | 0.31138096  |
| ENSGALG00010028102 | 0.899308536 | 0.476234277 |
| ENSGALG00010028103 | 0.937935362 | 0.263839415 |
| ENSGALG00010028104 | 0.953229089 | 0.304869721 |
| ENSGALG00010028105 | 0.985160285 | 0.343607225 |
| ENSGALG00010028106 | 0.847597183 | 0.261386269 |
| ENSGALG00010028107 | 0.331732426 | 0.057424403 |
| ENSGALG00010028108 | 0.320321366 | 0.004604427 |
| ENSGALG00010028109 | 0.905189148 | 0.322199289 |
| ENSGALG00010028110 | 0.514678397 | 0.3796821   |
| ENSGALG00010028111 | 0.39483326  | 0.099921928 |
| ENSGALG00010028112 | 0.653880446 | 0.434988707 |
| ENSGALG00010028113 | 0.741090436 | 0.04934692  |
| ENSGALG00010028114 | 0.534948545 | 0.018797602 |
| ENSGALG00010028115 | 0.967995203 | 0.32767184  |
| ENSGALG00010028116 | 0.981237802 | 0.317302095 |
| ENSGALG00010028117 | 0.964414109 | 0.33755039  |
| ENSGALG00010028118 | 0.87749905  | 0.25072887  |
| ENSGALG00010028119 | 0.924905933 | 0.324274396 |
| ENSGALG00010028120 | 0.6223184   | 0.155574414 |
| ENSGALG00010028121 | 0.977015333 | 0.331566223 |
| ENSGALG00010028122 | 0.964946611 | 0.34226543  |
| ENSGALG00010028123 | 0.916336341 | 0.380046641 |
| ENSGALG00010028124 | 0.436005305 | 0.204504047 |
| ENSGALG00010028125 | 0.859355286 | 0.280881542 |
| ENSGALG00010028126 | 0.961618222 | 0.312284046 |
| ENSGALG00010028127 | 0.771666131 | 0.34363156  |
| ENSGALG00010028128 | 0.879891523 | 0.230284022 |
| ENSGALG00010028129 | 0.911961228 | 0.245384229 |
| ENSGALG00010028130 | 0.952082307 | 0.302499911 |
| ENSGALG00010028131 | 0.913554294 | 0.380832508 |
| ENSGALG00010028132 | 0.760663751 | 0.167021327 |
| ENSGALG00010028133 | 0.816068469 | 0.301658128 |
| ENSGALG00010028134 | 0.777095998 | 0.361395974 |
| ENSGALG00010028135 | 0.627840989 | 0.083643133 |
| ENSGALG00010028136 | 0.66854655  | 0.119252656 |
| ENSGALG00010028137 | 0.591233376 | 0.404696013 |
| ENSGALG00010028138 | 0.396080963 | 0.234725335 |
| ENSGALG00010028139 | 0.956371083 | 0.278470732 |
| ENSGALG00010028140 | 0.823131879 | 0.340554593 |
| ENSGALG00010028141 | 0.732559994 | 0.150917192 |
| ENSGALG00010028142 | 0.50454932  | 0.201716762 |
| ENSGALG00010028144 | 0.934484675 | 0.260121282 |
| ENSGALG00010028145 | 0.670522007 | 0.064040035 |
| ENSGALG00010028146 | 0.733147306 | 0.327625448 |
| ENSGALG00010028147 | 0.873972512 | 0.143659682 |
| ENSGALG00010028148 | 0.991577109 | 0.312281158 |

|                    |             |             |
|--------------------|-------------|-------------|
| ENSGALG00010028149 | 0.874518111 | 0.258040896 |
| ENSGALG00010028150 | 0.6096093   | 0.573528567 |
| ENSGALG00010028151 | 0.662722831 | 0.016557706 |
| ENSGALG00010028152 | 0.486324452 | 0.695992403 |
| ENSGALG00010028153 | 0.399389175 | 0.163283405 |
| ENSGALG00010028154 | 0.049138588 | 0.34885672  |
| ENSGALG00010028155 | 0.985286126 | 0.296643229 |
| ENSGALG00010028156 | 0.953209041 | 0.321407031 |
| ENSGALG00010028157 | 0.701406354 | 0.060324443 |
| ENSGALG00010028158 | 0.662787262 | 0.574928682 |
| ENSGALG00010028159 | 0.183641364 | 0.143268904 |
| ENSGALG00010028160 | 0.756174438 | 0.260029936 |
| ENSGALG00010028161 | 0.909735981 | 0.339164964 |
| ENSGALG00010028162 | 0.890418983 | 0.554284061 |
| ENSGALG00010028163 | 0.874497671 | 0.313029551 |
| ENSGALG00010028164 | 0.38268392  | 0.37685511  |
| ENSGALG00010028165 | 0.896343287 | 0.362447653 |
| ENSGALG00010028166 | 0.061531154 | 0.288695837 |
| ENSGALG00010028167 | 0.958235061 | 0.277603786 |
| ENSGALG00010028168 | 0.963333987 | 0.334502135 |
| ENSGALG00010028169 | 0.971359527 | 0.279320471 |
| ENSGALG00010028170 | 0.916247797 | 0.355908404 |
| ENSGALG00010028171 | 0.993864346 | 0.344029864 |
| ENSGALG00010028172 | 0.846996183 | 0.270568898 |
| ENSGALG00010028173 | 0.975128757 | 0.293427429 |
| ENSGALG00010028174 | 0.827117353 | 0.300653246 |
| ENSGALG00010028175 | 0.927639748 | 0.270098095 |
| ENSGALG00010028176 | 0.860143302 | 0.203919293 |
| ENSGALG00010028177 | 0.95898139  | 0.391482325 |
| ENSGALG00010028178 | 0.947943183 | 0.431695166 |
| ENSGALG00010028179 | 0.587386199 | 0.089795015 |
| ENSGALG00010028180 | 0.317508343 | 0.006938615 |
| ENSGALG00010028181 | 0.718825646 | 0.210516313 |
| ENSGALG00010028182 | 0.913278456 | 0.308536994 |
| ENSGALG00010028183 | 0.12558323  | 0.175468314 |
| ENSGALG00010028184 | 0.727461212 | 0.231468021 |
| ENSGALG00010028185 | 0.844752843 | 0.164508769 |
| ENSGALG00010028186 | 0.953927981 | 0.322021971 |
| ENSGALG00010028187 | 0.707442134 | 0.046223755 |
| ENSGALG00010028188 | 0.965413089 | 0.287192158 |
| ENSGALG00010028189 | 0.754212683 | 0.097615034 |
| ENSGALG00010028190 | 0.911026698 | 0.232858834 |
| ENSGALG00010028191 | 0.948110264 | 0.399512811 |
| ENSGALG00010028192 | 0.715964996 | 0.303110779 |
| ENSGALG00010028193 | 0.936565729 | 0.364190349 |
| ENSGALG00010028194 | 0.857271273 | 0.338671359 |
| ENSGALG00010028195 | 0.862089227 | 0.292876488 |
| ENSGALG00010028196 | 0.964897913 | 0.274086817 |
| ENSGALG00010028197 | 0.898700779 | 0.321724552 |
| ENSGALG00010028198 | 0.94873886  | 0.349427188 |
| ENSGALG00010028199 | 0.184255302 | 0.188105183 |
| ENSGALG00010028200 | 0.421006053 | 0.290336603 |
| ENSGALG00010028201 | 0.983105348 | 0.336840062 |
| ENSGALG00010028202 | 0.94903935  | 0.240297848 |
| ENSGALG00010028204 | 0.74106493  | 0.230268633 |
| ENSGALG00010028205 | 0.99108802  | 0.298213375 |

|                    |             |             |
|--------------------|-------------|-------------|
| ENSGALG00010028206 | 0.844063842 | 0.20921822  |
| ENSGALG00010028207 | 0.908215205 | 0.315488625 |
| ENSGALG00010028208 | 0.635705932 | 0.164955432 |
| ENSGALG00010028211 | 0.972023346 | 0.271890225 |
| ENSGALG00010028214 | 0.407102152 | 0.199420323 |
| ENSGALG00010028215 | 0.271701261 | 0.072417625 |
| ENSGALG00010028217 | 0.433096566 | 0.307096488 |
| ENSGALG00010028221 | 0.953836811 | 0.233827903 |
| ENSGALG00010028224 | 0.863836175 | 0.56169598  |
| ENSGALG00010028225 | 0.317155256 | 0.13063615  |
| ENSGALG00010028228 | 0.234771306 | 0.207497118 |
| ENSGALG00010028231 | 0.333832984 | 0.163897725 |
| ENSGALG00010028232 | 0.954402118 | 0.254440221 |
| ENSGALG00010028233 | 0.304106886 | 0.03208708  |
| ENSGALG00010028235 | 0.657675788 | 0.321878198 |
| ENSGALG00010028238 | 0.25824367  | 0.193626791 |
| ENSGALG00010028241 | 0.294093629 | 0.19319161  |
| ENSGALG00010028242 | 0.180457871 | 0.122865108 |
| ENSGALG00010028244 | 0.901053025 | 0.121899606 |
| ENSGALG00010028246 | 0.858948828 | 0.037850134 |
| ENSGALG00010028247 | 0.078080342 | 0.163556713 |
| ENSGALG00010028248 | 0.62562242  | 0.042089194 |
| ENSGALG00010028249 | 0.855198511 | 0.23923833  |
| ENSGALG00010028250 | 0.345023716 | 0.157482062 |
| ENSGALG00010028251 | 0.490982144 | 0.141261977 |
| ENSGALG00010028252 | 0.323828903 | 0.027237309 |
| ENSGALG00010028254 | 0.191186883 | 0.091883276 |
| ENSGALG00010028255 | 0.266514019 | 0.223679135 |
| ENSGALG00010028258 | 0.628904518 | 0.434953629 |
| ENSGALG00010028259 | 0.798391926 | 0.458387828 |
| ENSGALG00010028260 | 0.285533721 | 0.190043249 |
| ENSGALG00010028261 | 0.015935051 | 0.173680644 |
| ENSGALG00010028262 | 0.935255749 | 0.25599142  |
| ENSGALG00010028263 | 0.015616096 | 0.166431014 |
| ENSGALG00010028264 | 0.386719876 | 0.191163161 |
| ENSGALG00010028265 | 0.19020302  | 0.31813848  |
| ENSGALG00010028267 | 0.364055186 | 0.42690201  |
| ENSGALG00010028268 | 0.169528072 | 0.055502654 |
| ENSGALG00010028269 | 0.219386918 | 0.079388121 |
| ENSGALG00010028270 | 0.970050129 | 0.248295467 |
| ENSGALG00010028271 | 0.38813597  | 0.156768404 |
| ENSGALG00010028272 | 0.314874757 | 0.361635101 |
| ENSGALG00010028274 | 0.285179533 | 0.121954912 |
| ENSGALG00010028277 | 0.872700884 | 0.306345208 |
| ENSGALG00010028278 | 0.001469805 | 0.175131669 |
| ENSGALG00010028281 | 0.062935807 | 0.101865633 |
| ENSGALG00010028282 | 0.669949337 | 0.488511518 |
| ENSGALG00010028283 | 0.960406589 | 0.316452541 |
| ENSGALG00010028284 | 0.173867179 | 0.018916982 |
| ENSGALG00010028287 | 0.159280159 | 0.118171765 |
| ENSGALG00010028288 | 0.271699272 | 0.336976622 |
| ENSGALG00010028296 | 0.353817108 | 0.280339226 |
| ENSGALG00010028297 | 0.390218599 | 0.089311719 |
| ENSGALG00010028298 | 0.991007398 | 0.310715915 |
| ENSGALG00010028301 | 0.55532104  | 0.340628811 |
| ENSGALG00010028306 | 0.083977401 | 0.264925397 |

|                    |             |             |
|--------------------|-------------|-------------|
| ENSGALG00010028307 | 0.063657685 | 0.134567151 |
| ENSGALG00010028308 | 0.396343306 | 0.152518913 |
| ENSGALG00010028309 | 0.457678933 | 0.122453557 |
| ENSGALG00010028311 | 0.510170206 | 0.501690956 |
| ENSGALG00010028312 | 0.695687691 | 0.361337073 |
| ENSGALG00010028313 | 0.839207488 | 0.281340433 |
| ENSGALG00010028314 | 0.982799717 | 0.323516825 |
| ENSGALG00010028316 | 0.684551278 | 0.23807148  |
| ENSGALG00010028317 | 0.807533559 | 0.161415215 |
| ENSGALG00010028318 | 0.223820863 | 0.025578236 |
| ENSGALG00010028319 | 0.442711702 | 0.1454099   |
| ENSGALG00010028320 | 0.300123619 | 0.204779738 |
| ENSGALG00010028321 | 0.688968321 | 0.022773809 |
| ENSGALG00010028322 | 0.298125726 | 0.587497397 |
| ENSGALG00010028324 | 0.303942447 | 0.152546132 |
| ENSGALG00010028326 | 0.123974279 | 0.324303115 |
| ENSGALG00010028328 | 0.599804723 | 0.110158189 |
| ENSGALG00010028329 | 0.401327218 | 0.103777949 |
| ENSGALG00010028331 | 0.005675254 | 0.152307444 |
| ENSGALG00010028332 | 0.838003105 | 0.26958222  |
| ENSGALG00010028333 | 0.867986486 | 0.245498137 |
| ENSGALG00010028334 | 0.917999647 | 0.298143312 |
| ENSGALG00010028335 | 0.891595533 | 0.252103673 |
| ENSGALG00010028337 | 0.973043181 | 0.294171229 |
| ENSGALG00010028338 | 0.399428581 | 0.10718574  |
| ENSGALG00010028339 | 0.669609291 | 0.165911192 |
| ENSGALG00010028340 | 0.834364326 | 0.096616145 |
| ENSGALG00010028341 | 0.753752784 | 0.100546484 |
| ENSGALG00010028342 | 0.501075399 | 0.177682095 |
| ENSGALG00010028343 | 0.208190352 | 0.146696756 |
| ENSGALG00010028344 | 0.140282969 | 0.037579917 |
| ENSGALG00010028345 | 0.075275665 | 0.128781405 |
| ENSGALG00010028346 | 0.186528505 | 0.146846001 |
| ENSGALG00010028347 | 0.714538923 | 0.270929631 |
| ENSGALG00010028348 | 0.890825136 | 0.335424938 |
| ENSGALG00010028349 | 0.477393685 | 0.189411753 |
| ENSGALG00010028352 | 0.254758994 | 0.252732843 |
| ENSGALG00010028354 | 0.575816562 | 0.182921777 |
| ENSGALG00010028355 | 0.943282966 | 0.271735703 |
| ENSGALG00010028357 | 0.826863542 | 0.240979711 |
| ENSGALG00010028358 | 0.87200405  | 0.230061462 |
| ENSGALG00010028359 | 0.032232389 | 0.38723197  |
| ENSGALG00010028362 | 0.081124257 | 0.37131748  |
| ENSGALG00010028363 | 0.941621606 | 0.266700206 |
| ENSGALG00010028364 | 0.975512785 | 0.35212538  |
| ENSGALG00010028365 | 0.520823946 | 0.307483387 |
| ENSGALG00010028366 | 0.901264346 | 0.386166154 |
| ENSGALG00010028367 | 0.285179533 | 0.121954912 |
| ENSGALG00010028368 | 0.867549058 | 0.251714682 |
| ENSGALG00010028369 | 0.551396218 | 0.080036539 |
| ENSGALG00010028370 | 0.933759202 | 0.39192207  |
| ENSGALG00010028372 | 0.861673252 | 0.337891599 |
| ENSGALG00010028374 | 0.085303677 | 0.081706369 |
| ENSGALG00010028375 | 0.119510349 | 0.291295431 |
| ENSGALG00010028376 | 0.406942834 | 0.032764134 |
| ENSGALG00010028377 | 0.810527411 | 0.45108025  |

|                    |             |             |
|--------------------|-------------|-------------|
| ENSGALG00010028378 | 0.310043156 | 0.36908045  |
| ENSGALG00010028380 | 0.921594547 | 0.275578097 |
| ENSGALG00010028382 | 0.934153511 | 0.332102631 |
| ENSGALG00010028383 | 0.1661022   | 0.376192566 |
| ENSGALG00010028388 | 0.491886059 | 0.325801125 |
| ENSGALG00010028389 | 0.187400028 | 0.199108296 |
| ENSGALG00010028390 | 0.194390396 | 0.166300887 |
| ENSGALG00010028391 | 0.455139312 | 0.129475505 |
| ENSGALG00010028392 | 0.924227289 | 0.127028705 |
| ENSGALG00010028393 | 0.385917095 | 0.083976977 |
| ENSGALG00010028394 | 0.201458959 | 0.265843204 |
| ENSGALG00010028395 | 0.633386799 | 0.322591717 |
| ENSGALG00010028398 | 0.298399403 | 0.094963927 |
| ENSGALG00010028399 | 0.902994612 | 0.466180497 |
| ENSGALG00010028400 | 0.696814712 | 0.221484982 |
| ENSGALG00010028403 | 0.5278691   | 0.342775586 |
| ENSGALG00010028405 | 0.931719737 | 0.329341748 |
| ENSGALG00010028407 | 0.197090373 | 0.262558979 |
| ENSGALG00010028409 | 0.492765214 | 0.168083719 |
| ENSGALG00010028411 | 0.990678018 | 0.338370521 |
| ENSGALG00010028412 | 0.926503332 | 0.354485628 |
| ENSGALG00010028413 | 0.903991562 | 0.310429052 |
| ENSGALG00010028414 | 0.930377656 | 0.395753032 |
| ENSGALG00010028415 | 0.984934259 | 0.314233072 |
| ENSGALG00010028416 | 0.146717733 | 0.186292138 |
| ENSGALG00010028417 | 0.611708584 | 0.224122606 |
| ENSGALG00010028418 | 0.989932691 | 0.334317674 |
| ENSGALG00010028419 | 0.865636596 | 0.41674532  |
| ENSGALG00010028420 | 0.554978532 | 0.268297266 |
| ENSGALG00010028421 | 0.428456045 | 0.220898209 |
| ENSGALG00010028422 | 0.961343228 | 0.293399489 |
| ENSGALG00010028425 | 0.970426829 | 0.294241823 |
| ENSGALG00010028426 | 0.544220967 | 0.006676139 |
| ENSGALG00010028427 | 0.085488368 | 0.238055966 |
| ENSGALG00010028428 | 0.232744471 | 0.145437826 |
| ENSGALG00010028429 | 0.623920385 | 0.011790796 |
| ENSGALG00010028430 | 0.938380923 | 0.261762187 |
| ENSGALG00010028431 | 0.729076068 | 0.452691386 |
| ENSGALG00010028432 | 0.958138658 | 0.334185509 |
| ENSGALG00010028433 | 0.393097515 | 0.246928066 |
| ENSGALG00010028434 | 0.884642526 | 0.445703404 |
| ENSGALG00010028435 | 0.799806924 | 0.333572259 |
| ENSGALG00010028436 | 0.983999052 | 0.356842718 |
| ENSGALG00010028437 | 0.913427677 | 0.538671245 |
| ENSGALG00010028438 | 0.876439338 | 0.384991547 |
| ENSGALG00010028439 | 0.114171529 | 0.297722856 |
| ENSGALG00010028440 | 0.916382584 | 0.218359995 |
| ENSGALG00010028441 | 0.957789311 | 0.326902504 |
| ENSGALG00010028442 | 0.795748016 | 0.005433034 |
| ENSGALG00010028443 | 0.260901931 | 0.360175578 |
| ENSGALG00010028444 | 0.94357007  | 0.303089401 |
| ENSGALG00010028445 | 0.088780292 | 0.506210968 |
| ENSGALG00010028447 | 0.784101788 | 0.439597527 |
| ENSGALG00010028448 | 0.919702861 | 0.397400188 |
| ENSGALG00010028449 | 0.722170628 | 0.03264654  |
| ENSGALG00010028450 | 0.800545214 | 0.145390338 |

|                    |             |             |
|--------------------|-------------|-------------|
| ENSGALG00010028451 | 0.871069519 | 0.400888696 |
| ENSGALG00010028452 | 0.809798122 | 0.074837915 |
| ENSGALG00010028453 | 0.532576802 | 0.077740821 |
| ENSGALG00010028454 | 0.987899209 | 0.320633055 |
| ENSGALG00010028455 | 0.28149508  | 0.113236359 |
| ENSGALG00010028456 | 0.971260633 | 0.318940917 |
| ENSGALG00010028457 | 0.913605834 | 0.425256593 |
| ENSGALG00010028458 | 0.074770747 | 0.07271716  |
| ENSGALG00010028459 | 0.355618501 | 0.151276023 |
| ENSGALG00010028460 | 0.921791886 | 0.449116748 |
| ENSGALG00010028461 | 0.438438085 | 0.190786501 |
| ENSGALG00010028462 | 0.163508537 | 0.011402347 |
| ENSGALG00010028463 | 0.99149919  | 0.317537641 |
| ENSGALG00010028464 | 0.602607235 | 0.198112452 |
| ENSGALG00010028465 | 0.919315974 | 0.34762962  |
| ENSGALG00010028466 | 0.987946026 | 0.358999328 |
| ENSGALG00010028467 | 0.961288014 | 0.339014545 |
| ENSGALG00010028468 | 0.47628697  | 0.164924065 |
| ENSGALG00010028470 | 0.540987655 | 0.124705891 |
| ENSGALG00010028471 | 0.832892498 | 0.329828838 |
| ENSGALG00010028472 | 0.926775947 | 0.287813146 |
| ENSGALG00010028473 | 0.968658694 | 0.269034246 |
| ENSGALG00010028474 | 0.899034289 | 0.388887883 |
| ENSGALG00010028475 | 0.983200123 | 0.271337253 |
| ENSGALG00010028476 | 0.994094042 | 0.326997787 |
| ENSGALG00010028477 | 0.350455964 | 0.27830169  |
| ENSGALG00010028478 | 0.153308058 | 0.231161324 |
| ENSGALG00010028479 | 0.995472424 | 0.350238687 |
| ENSGALG00010028480 | 0.980798179 | 0.306811385 |
| ENSGALG00010028481 | 0.674149976 | 0.280027664 |
| ENSGALG00010028482 | 0.481949378 | 0.570373855 |
| ENSGALG00010028483 | 0.859245925 | 0.294436629 |
| ENSGALG00010028484 | 0.935805621 | 0.427273373 |
| ENSGALG00010028485 | 0.988747149 | 0.294243674 |
| ENSGALG00010028486 | 0.93227671  | 0.170957351 |
| ENSGALG00010028487 | 0.987455068 | 0.340191931 |
| ENSGALG00010028488 | 0.958818623 | 0.369475383 |
| ENSGALG00010028489 | 0.770138303 | 0.320417131 |
| ENSGALG00010028490 | 0.929519189 | 0.241756114 |
| ENSGALG00010028491 | 0.849932353 | 0.225704379 |
| ENSGALG00010028492 | 0.962252367 | 0.277063784 |
| ENSGALG00010028493 | 0.959090507 | 0.273107897 |
| ENSGALG00010028494 | 0.909482752 | 0.290220565 |
| ENSGALG00010028495 | 0.918257664 | 0.313066414 |
| ENSGALG00010028496 | 0.976724583 | 0.265231702 |
| ENSGALG00010028497 | 0.319962382 | 0.029634672 |
| ENSGALG00010028498 | 0.850233424 | 0.441250977 |
| ENSGALG00010028499 | 0.849203007 | 0.269233425 |
| ENSGALG00010028500 | 0.849953411 | 0.220039934 |
| ENSGALG00010028501 | 0.932993824 | 0.223417983 |
| ENSGALG00010028502 | 0.952949396 | 0.306406139 |
| ENSGALG00010028503 | 0.6598265   | 0.339096807 |
| ENSGALG00010028506 | 0.050979664 | 0.142981828 |
| ENSGALG00010028507 | 0.970818188 | 0.312637533 |
| ENSGALG00010028508 | 0.480232974 | 0.412250666 |
| ENSGALG00010028510 | 0.833418194 | 0.027146688 |

|                    |             |             |
|--------------------|-------------|-------------|
| ENSGALG00010028511 | 0.120869112 | 0.158641392 |
| ENSGALG00010028512 | 0.475457535 | 0.07559826  |
| ENSGALG00010028513 | 0.441438777 | 0.553197771 |
| ENSGALG00010028514 | 0.944841712 | 0.326312691 |
| ENSGALG00010028516 | 0.934732154 | 0.413907441 |
| ENSGALG00010028517 | 0.294826952 | 0.114439813 |
| ENSGALG00010028518 | 0.909266099 | 0.393131589 |
| ENSGALG00010028520 | 0.482286234 | 0.152831865 |
| ENSGALG00010028523 | 0.456396609 | 0.387658885 |
| ENSGALG00010028525 | 0.993904832 | 0.337256312 |
| ENSGALG00010028528 | 0.892998391 | 0.211406428 |
| ENSGALG00010028529 | 0.271701261 | 0.072417625 |
| ENSGALG00010028535 | 0.994119331 | 0.326295196 |
| ENSGALG00010028536 | 0.945137497 | 0.365394335 |
| ENSGALG00010028538 | 0.99421042  | 0.325745689 |
| ENSGALG00010028541 | 0.495098378 | 0.303900124 |
| ENSGALG00010028543 | 0.151242978 | 0.024739024 |
| ENSGALG00010028544 | 0.880021036 | 0.210153605 |
| ENSGALG00010028547 | 0.701281596 | 0.163567749 |
| ENSGALG00010028548 | 0.947293682 | 0.272139471 |
| ENSGALG00010028549 | 0.001708573 | 0.132604552 |
| ENSGALG00010028550 | 0.977495902 | 0.359727732 |
| ENSGALG00010028551 | 0.452558713 | 0.277950787 |
| ENSGALG00010028553 | 0.796874164 | 0.051170403 |
| ENSGALG00010028556 | 0.670542552 | 0.207303904 |
| ENSGALG00010028559 | 0.915025878 | 0.377777237 |
| ENSGALG00010028561 | 0.716031809 | 0.083694131 |
| ENSGALG00010028562 | 0.871363557 | 0.001264741 |
| ENSGALG00010028565 | 0.841171397 | 0.270891019 |
| ENSGALG00010028566 | 0.431360016 | 0.316354216 |
| ENSGALG00010028568 | 0.602680346 | 0.181887058 |
| ENSGALG00010028569 | 0.416626919 | 0.015148479 |
| ENSGALG00010028570 | 0.916613445 | 0.319669993 |
| ENSGALG00010028571 | 0.230810078 | 0.278328982 |
| ENSGALG00010028572 | 0.4409894   | 0.320808527 |
| ENSGALG00010028573 | 0.884279773 | 0.366655758 |
| ENSGALG00010028574 | 0.895285536 | 0.443762346 |
| ENSGALG00010028575 | 0.681192846 | 0.107051716 |
| ENSGALG00010028576 | 0.557080381 | 0.159997392 |
| ENSGALG00010028577 | 0.95491254  | 0.254255106 |
| ENSGALG00010028578 | 0.530543095 | 0.108416183 |
| ENSGALG00010028579 | 0.754821316 | 0.415303213 |
| ENSGALG00010028580 | 0.802205149 | 0.347157133 |
| ENSGALG00010028581 | 0.844253665 | 0.281017423 |
| ENSGALG00010028582 | 0.625253149 | 0.035973824 |
| ENSGALG00010028583 | 0.771867965 | 0.108849973 |
| ENSGALG00010028584 | 0.970429455 | 0.226076268 |
| ENSGALG00010028585 | 0.910836376 | 0.270298678 |
| ENSGALG00010028586 | 0.964592487 | 0.325847083 |
| ENSGALG00010028587 | 0.20710621  | 0.028654473 |
| ENSGALG00010028588 | 0.259798891 | 0.849430008 |
| ENSGALG00010028589 | 0.927923509 | 0.170404664 |
| ENSGALG00010028590 | 0.980105101 | 0.328901864 |
| ENSGALG00010028591 | 0.218579171 | 0.007353185 |
| ENSGALG00010028592 | 0.972999245 | 0.26212559  |
| ENSGALG00010028593 | 0.950045067 | 0.300779977 |

|                    |             |             |
|--------------------|-------------|-------------|
| ENSGALG00010028594 | 0.978049011 | 0.310550248 |
| ENSGALG00010028595 | 0.994713331 | 0.321905236 |
| ENSGALG00010028596 | 0.986862637 | 0.328650974 |
| ENSGALG00010028597 | 0.962666559 | 0.294708586 |
| ENSGALG00010028598 | 0.999184491 | 0.32932947  |
| ENSGALG00010028599 | 0.989288635 | 0.294256249 |
| ENSGALG00010028600 | 0.983058712 | 0.342984566 |
| ENSGALG00010028601 | 0.992502295 | 0.325577296 |
| ENSGALG00010028602 | 0.920635549 | 0.356703159 |
| ENSGALG00010028603 | 0.936727342 | 0.229215839 |
| ENSGALG00010028604 | 0.030971975 | 0.01833132  |
| ENSGALG00010028605 | 0.828551812 | 0.311051411 |
| ENSGALG00010028606 | 0.968525456 | 0.279902418 |
| ENSGALG00010028607 | 0.942205963 | 0.331724776 |
| ENSGALG00010028608 | 0.976751232 | 0.359116541 |
| ENSGALG00010028609 | 0.936565978 | 0.353537388 |
| ENSGALG00010028610 | 0.939457166 | 0.437428888 |
| ENSGALG00010028611 | 0.854962819 | 0.350201483 |
| ENSGALG00010028612 | 0.685890177 | 0.227393664 |
| ENSGALG00010028613 | 0.821148199 | 0.268768265 |
| ENSGALG00010028614 | 0.557322348 | 0.184745089 |
| ENSGALG00010028615 | 0.088904751 | 0.024105003 |
| ENSGALG00010028616 | 0.309655755 | 0.987979031 |
| ENSGALG00010028617 | 0.144040418 | 0.155016492 |
| ENSGALG00010028618 | 0.979896134 | 0.311263289 |
| ENSGALG00010028619 | 0.365862997 | 0.257073287 |
| ENSGALG00010028620 | 0.270851313 | 0.216716485 |
| ENSGALG00010028622 | 0.189240572 | 0.04996112  |
| ENSGALG00010028626 | 0.974456756 | 0.316235652 |
| ENSGALG00010028627 | 0.386800217 | 0.214616758 |
| ENSGALG00010028628 | 0.251056315 | 0.192486239 |
| ENSGALG00010028633 | 0.837962202 | 0.414826671 |
| ENSGALG00010028634 | 0.708798997 | 0.547343251 |
| ENSGALG00010028635 | 0.51259949  | 0.327173137 |
| ENSGALG00010028636 | 0.415585971 | 0.352768884 |
| ENSGALG00010028641 | 0.371942231 | 0.168336798 |
| ENSGALG00010028642 | 0.857129801 | 0.349623958 |
| ENSGALG00010028643 | 0.513849806 | 0.2018346   |
| ENSGALG00010028645 | 0.332566097 | 0.145842773 |
| ENSGALG00010028646 | 0.205334133 | 0.18475969  |
| ENSGALG00010028648 | 0.107126787 | 0.270085544 |
| ENSGALG00010028649 | 0.925028481 | 0.406673146 |
| ENSGALG00010028650 | 0.899139007 | 0.311291546 |
| ENSGALG00010028651 | 0.095918798 | 0.385687932 |
| ENSGALG00010028652 | 0.646047855 | 0.330587407 |
| ENSGALG00010028653 | 0.217540133 | 0.027611342 |
| ENSGALG00010028654 | 0.362179464 | 0.653663197 |
| ENSGALG00010028655 | 0.677487142 | 0.126834392 |
| ENSGALG00010028657 | 0.148901949 | 0.334499326 |
| ENSGALG00010028658 | 0.933213103 | 0.264613419 |
| ENSGALG00010028660 | 0.101500259 | 0.192665648 |
| ENSGALG00010028661 | 0.88017148  | 0.471725069 |
| ENSGALG00010028662 | 0.52272835  | 0.084598193 |
| ENSGALG00010028663 | 0.570557434 | 0.231043008 |
| ENSGALG00010028664 | 0.363397673 | 0.209391989 |
| ENSGALG00010028665 | 0.730052098 | 0.252912954 |



|                    |             |             |
|--------------------|-------------|-------------|
| ENSGALG00010028666 | 0.825879311 | 0.285773782 |
| ENSGALG00010028667 | 0.103877244 | 0.131405303 |
| ENSGALG00010028668 | 0.090150639 | 0.269233068 |
| ENSGALG00010028669 | 0.072582137 | 0.360728672 |
| ENSGALG00010028670 | 0.096584746 | 0.230715513 |
| ENSGALG00010028671 | 0.717356105 | 0.193282083 |
| ENSGALG00010028673 | 0.054470997 | 0.402410723 |
| ENSGALG00010028674 | 0.858851214 | 0.383272553 |
| ENSGALG00010028675 | 0.957289872 | 0.300563413 |
| ENSGALG00010028676 | 0.960113891 | 0.309680516 |
| ENSGALG00010028677 | 0.771571997 | 0.08846253  |
| ENSGALG00010028678 | 0.078418949 | 0.131024373 |
| ENSGALG00010028679 | 0.40308773  | 0.146014129 |
| ENSGALG00010028680 | 0.092838636 | 0.16556646  |
| ENSGALG00010028681 | 0.610788432 | 0.255458751 |
| ENSGALG00010028682 | 0.011589493 | 0.110944875 |
| ENSGALG00010028683 | 0.975649969 | 0.397527032 |
| ENSGALG00010028684 | 0.855786102 | 0.291677561 |
| ENSGALG00010028685 | 0.89924336  | 0.39805766  |
| ENSGALG00010028686 | 0.640095604 | 0.382573794 |
| ENSGALG00010028689 | 0.742551957 | 0.117506154 |
| ENSGALG00010028690 | 0.440387508 | 0.523944502 |
| ENSGALG00010028691 | 0.658593102 | 0.371953082 |
| ENSGALG00010028692 | 0.919623358 | 0.397038564 |
| ENSGALG00010028693 | 0.365259184 | 0.356937382 |
| ENSGALG00010028694 | 0.700970403 | 0.604842321 |
| ENSGALG00010028695 | 0.256350973 | 0.133778452 |
| ENSGALG00010028696 | 0.629709439 | 0.268256273 |
| ENSGALG00010028699 | 0.882964898 | 0.314460817 |
| ENSGALG00010028700 | 0.804796421 | 0.391767411 |
| ENSGALG00010028701 | 0.74555256  | 0.19221884  |
| ENSGALG00010028702 | 0.741942672 | 0.370967699 |
| ENSGALG00010028705 | 0.415654447 | 0.189116078 |
| ENSGALG00010028706 | 0.173458425 | 0.199362002 |
| ENSGALG00010028708 | 0.975215344 | 0.342762051 |
| ENSGALG00010028709 | 0.728950546 | 0.249573786 |
| ENSGALG00010028711 | 0.731451787 | 0.027399138 |
| ENSGALG00010028712 | 0.131447791 | 0.201484131 |
| ENSGALG00010028714 | 0.764773799 | 0.414827242 |
| ENSGALG00010028715 | 0.265558089 | 0.028821141 |
| ENSGALG00010028722 | 0.264677033 | 0.216624317 |
| ENSGALG00010028723 | 0.059104051 | 0.085538612 |
| ENSGALG00010028724 | 0.432922988 | 0.142055724 |
| ENSGALG00010028725 | 0.993638364 | 0.359287019 |
| ENSGALG00010028726 | 0.947638329 | 0.308103566 |
| ENSGALG00010028727 | 0.833092108 | 0.271438322 |
| ENSGALG00010028728 | 0.203991683 | 0.058221925 |
| ENSGALG00010028730 | 0.379887859 | 0.102864813 |
| ENSGALG00010028732 | 0.435024422 | 0.326149724 |
| ENSGALG00010028733 | 0.370756474 | 0.275399566 |
| ENSGALG00010028734 | 0.858362682 | 0.196238811 |
| ENSGALG00010028735 | 0.682738314 | 0.080199917 |
| ENSGALG00010028738 | 0.413239085 | 0.364941309 |
| ENSGALG00010028739 | 0.804161938 | 0.171208125 |
| ENSGALG00010028740 | 0.107931762 | 0.050084819 |
| ENSGALG00010028742 | 0.060208389 | 0.611333422 |

|                    |             |             |
|--------------------|-------------|-------------|
| ENSGALG00010028743 | 0.534227901 | 0.042476155 |
| ENSGALG00010028744 | 0.989116048 | 0.333260469 |
| ENSGALG00010028745 | 0.689430254 | 0.271640472 |
| ENSGALG00010028746 | 0.976427553 | 0.320907665 |
| ENSGALG00010028747 | 0.270560426 | 0.152183132 |
| ENSGALG00010028748 | 0.856178752 | 0.243457892 |
| ENSGALG00010028750 | 0.932212178 | 0.22640269  |
| ENSGALG00010028751 | 0.819047142 | 0.571878405 |
| ENSGALG00010028752 | 0.969748302 | 0.256057155 |
| ENSGALG00010028753 | 0.138510682 | 0.263671194 |
| ENSGALG00010028756 | 0.264239718 | 0.073427965 |
| ENSGALG00010028760 | 0.969296733 | 0.282710725 |
| ENSGALG00010028761 | 0.982595857 | 0.2675316   |
| ENSGALG00010028762 | 0.695451228 | 0.214269561 |
| ENSGALG00010028763 | 0.903366724 | 0.415089513 |
| ENSGALG00010028764 | 0.943890396 | 0.18153461  |
| ENSGALG00010028768 | 0.903376912 | 0.393023166 |
| ENSGALG00010028771 | 0.913612925 | 0.37863935  |
| ENSGALG00010028772 | 0.261891035 | 0.050295821 |
| ENSGALG00010028777 | 0.554782995 | 0.2064046   |
| ENSGALG00010028782 | 0.978202946 | 0.334896842 |
| ENSGALG00010028783 | 0.185357993 | 0.139330399 |
| ENSGALG00010028785 | 0.241608376 | 0.122620388 |
| ENSGALG00010028786 | 0.850378787 | 0.484455432 |
| ENSGALG00010028793 | 0.277566769 | 0.107857127 |
| ENSGALG00010028794 | 0.482505748 | 0.164169546 |
| ENSGALG00010028797 | 0.132583218 | 0.19457471  |
| ENSGALG00010028798 | 0.694348348 | 0.294400796 |
| ENSGALG00010028799 | 0.102263818 | 0.231665894 |
| ENSGALG00010028800 | 0.119990717 | 0.08394926  |
| ENSGALG00010028801 | 0.560759663 | 0.038769391 |
| ENSGALG00010028802 | 0.682397829 | 0.265589914 |
| ENSGALG00010028803 | 0.135899574 | 0.128824344 |
| ENSGALG00010028805 | 0.046193222 | 0.197262472 |
| ENSGALG00010028806 | 0.399695266 | 0.011610469 |
| ENSGALG00010028807 | 0.671935532 | 0.223886379 |
| ENSGALG00010028810 | 0.425485765 | 0.024326886 |
| ENSGALG00010028811 | 0.022266455 | 0.458482365 |
| ENSGALG00010028812 | 0.142866237 | 0.388358232 |
| ENSGALG00010028813 | 0.111059707 | 0.204208036 |
| ENSGALG00010028814 | 0.189240572 | 0.04996112  |
| ENSGALG00010028815 | 0.587867944 | 0.253116799 |
| ENSGALG00010028817 | 0.929043676 | 0.306493057 |
| ENSGALG00010028818 | 0.336910174 | 0.272324369 |
| ENSGALG00010028820 | 0.978810428 | 0.299832699 |
| ENSGALG00010028821 | 0.810777367 | 0.326929511 |
| ENSGALG00010028822 | 0.472034295 | 0.432818764 |
| ENSGALG00010028823 | 0.569565773 | 0.312327991 |
| ENSGALG00010028824 | 0.562212276 | 0.362160791 |
| ENSGALG00010028825 | 0.404167701 | 0.144831306 |
| ENSGALG00010028826 | 0.231848192 | 0.144441284 |
| ENSGALG00010028827 | 0.794315943 | 0.289572692 |
| ENSGALG00010028828 | 0.863338979 | 0.421123201 |
| ENSGALG00010028829 | 0.482885603 | 0.016080589 |
| ENSGALG00010028831 | 0.872954685 | 0.282951701 |
| ENSGALG00010028832 | 0.886539737 | 0.204409146 |

|                    |             |             |
|--------------------|-------------|-------------|
| ENSGALG00010028833 | 0.990199241 | 0.336153378 |
| ENSGALG00010028834 | 0.884682315 | 0.396977583 |
| ENSGALG00010028836 | 0.510958236 | 0.337941296 |
| ENSGALG00010028837 | 0.771025187 | 0.228612314 |
| ENSGALG00010028838 | 0.001640067 | 0.238025727 |
| ENSGALG00010028839 | 0.142284408 | 0.232950918 |
| ENSGALG00010028842 | 0.292351161 | 0.111245881 |
| ENSGALG00010028843 | 0.341172574 | 0.238879914 |
| ENSGALG00010028844 | 0.40023056  | 0.132187227 |
| ENSGALG00010028845 | 0.235489199 | 0.200926615 |
| ENSGALG00010028847 | 0.211991405 | 0.286722041 |
| ENSGALG00010028849 | 0.996870045 | 0.333112743 |
| ENSGALG00010028851 | 0.000960407 | 0.085810649 |
| ENSGALG00010028853 | 0.827512838 | 0.284846491 |
| ENSGALG00010028854 | 0.880997759 | 0.29688509  |
| ENSGALG00010028855 | 0.918469705 | 0.243565791 |
| ENSGALG00010028856 | 0.154776551 | 0.461347173 |
| ENSGALG00010028857 | 0.70883611  | 0.114341113 |
| ENSGALG00010028858 | 0.290366012 | 0.276219181 |
| ENSGALG00010028859 | 0.888007386 | 0.317082793 |
| ENSGALG00010028860 | 0.835076841 | 0.292431768 |
| ENSGALG00010028861 | 0.949994021 | 0.349567226 |
| ENSGALG00010028865 | 0.926983422 | 0.221812478 |
| ENSGALG00010028866 | 0.763994682 | 0.080775848 |
| ENSGALG00010028867 | 0.10898139  | 0.117849347 |
| ENSGALG00010028869 | 0.985078236 | 0.342298004 |
| ENSGALG00010028870 | 0.943995544 | 0.255132197 |
| ENSGALG00010028871 | 0.973585095 | 0.403634289 |
| ENSGALG00010028872 | 0.969980738 | 0.364146317 |
| ENSGALG00010028873 | 0.977339702 | 0.279028282 |
| ENSGALG00010028874 | 0.619308934 | 0.13492423  |
| ENSGALG00010028875 | 0.96011965  | 0.323880152 |
| ENSGALG00010028876 | 0.416437857 | 0.144697522 |
| ENSGALG00010028878 | 0.751641455 | 0.293822193 |
| ENSGALG00010028881 | 0.803912427 | 0.333201198 |
| ENSGALG00010028884 | 0.979109272 | 0.262814581 |
| ENSGALG00010028885 | 0.936115594 | 0.279365798 |
| ENSGALG00010028887 | 0.014780113 | 0.093338841 |
| ENSGALG00010028888 | 0.824986267 | 0.300913203 |
| ENSGALG00010028889 | 0.938323188 | 0.282870267 |
| ENSGALG00010028890 | 0.059539862 | 0.180376229 |
| ENSGALG00010028891 | 0.817933597 | 0.460378755 |
| ENSGALG00010028892 | 0.912617253 | 0.450875468 |
| ENSGALG00010028893 | 0.916159434 | 0.207657233 |
| ENSGALG00010028894 | 0.640076666 | 0.094129266 |
| ENSGALG00010028896 | 0.949261875 | 0.293904084 |
| ENSGALG00010028897 | 0.96307149  | 0.405574192 |
| ENSGALG00010028898 | 0.822643833 | 0.26043989  |
| ENSGALG00010028899 | 0.853688716 | 0.431232264 |
| ENSGALG00010028900 | 0.823427467 | 0.191674757 |
| ENSGALG00010028901 | 0.863596796 | 0.245468023 |
| ENSGALG00010028902 | 0.274364069 | 0.161105648 |
| ENSGALG00010028903 | 0.223536814 | 0.302581821 |
| ENSGALG00010028904 | 0.733111782 | 0.193511353 |
| ENSGALG00010028905 | 0.876358207 | 0.403454199 |
| ENSGALG00010028906 | 0.711092839 | 0.376002045 |

|                    |             |             |
|--------------------|-------------|-------------|
| ENSGALG00010028909 | 0.535919624 | 0.29097414  |
| ENSGALG00010028912 | 0.917819819 | 0.280346647 |
| ENSGALG00010028913 | 0.769924307 | 0.150591577 |
| ENSGALG00010028914 | 0.962352839 | 0.251484589 |
| ENSGALG00010028915 | 0.539655856 | 0.172468264 |
| ENSGALG00010028916 | 0.196621825 | 0.258317461 |
| ENSGALG00010028917 | 0.951333704 | 0.426966211 |
| ENSGALG00010028918 | 0.701284223 | 0.029037434 |
| ENSGALG00010028919 | 0.554736829 | 0.270151541 |
| ENSGALG00010028921 | 0.983193054 | 0.31982648  |
| ENSGALG00010028922 | 0.37867901  | 0.208370193 |
| ENSGALG00010028923 | 0.681199044 | 0.352191514 |
| ENSGALG00010028924 | 0.885765058 | 0.277919966 |
| ENSGALG00010028925 | 0.985036985 | 0.368212209 |
| ENSGALG00010028926 | 0.229514601 | 0.252459805 |
| ENSGALG00010028930 | 0.271701261 | 0.072417625 |
| ENSGALG00010028931 | 0.749128298 | 0.276849937 |
| ENSGALG00010028932 | 0.122172626 | 0.391373971 |
| ENSGALG00010028935 | 0.276156205 | 0.230511396 |
| ENSGALG00010028936 | 0.262939219 | 0.025300248 |
| ENSGALG00010028937 | 0.378356569 | 0.111059644 |
| ENSGALG00010028939 | 0.41124688  | 0.494068853 |
| ENSGALG00010028940 | 0.216433634 | 0.680598293 |
| ENSGALG00010028943 | 0.327171109 | 0.165614547 |
| ENSGALG00010028945 | 0.369201932 | 0.878545561 |
| ENSGALG00010028948 | 0.309655755 | 0.987979031 |
| ENSGALG00010028949 | 0.627875785 | 0.180920851 |
| ENSGALG00010028951 | 0.490247427 | 0.088932749 |
| ENSGALG00010028957 | 0.309677636 | 0.988082733 |
| ENSGALG00010028960 | 0.310184688 | 0.17631624  |
| ENSGALG00010028962 | 0.34081212  | 0.34730063  |
| ENSGALG00010028963 | 0.40407931  | 0.24317184  |
| ENSGALG00010028966 | 0.012368823 | 0.162842107 |
| ENSGALG00010028967 | 0.393634217 | 0.115318426 |
| ENSGALG00010028972 | 0.237514972 | 0.409481613 |
| ENSGALG00010028973 | 0.458750443 | 0.177069425 |
| ENSGALG00010028980 | 0.020656918 | 0.064774402 |
| ENSGALG00010028981 | 0.476711311 | 0.203859313 |
| ENSGALG00010028983 | 0.398511795 | 0.272244852 |
| ENSGALG00010028984 | 0.081791238 | 0.074811512 |
| ENSGALG00010028989 | 0.234345033 | 0.123532749 |
| ENSGALG00010028990 | 0.429385192 | 0.113102805 |
| ENSGALG00010028991 | 0.115305899 | 0.328817113 |
| ENSGALG00010028992 | 0.197061897 | 0.237610802 |
| ENSGALG00010028993 | 0.076469307 | 0.242971074 |
| ENSGALG00010028994 | 0.396668506 | 0.181671381 |
| ENSGALG00010028995 | 0.372796048 | 0.167811456 |
| ENSGALG00010028997 | 0.715019265 | 0.056469794 |
| ENSGALG00010028998 | 0.271701261 | 0.072417625 |
| ENSGALG00010029000 | 0.739995572 | 0.312935623 |
| ENSGALG00010029001 | 0.388293838 | 0.285628693 |
| ENSGALG00010029005 | 0.200570274 | 0.091667991 |
| ENSGALG00010029007 | 0.668780928 | 0.193518964 |
| ENSGALG00010029009 | 0.271701261 | 0.072417625 |
| ENSGALG00010029011 | 0.064206171 | 0.20106995  |
| ENSGALG00010029021 | 0.263966013 | 0.445665299 |

|                    |             |             |
|--------------------|-------------|-------------|
| ENSGALG00010029022 | 0.419611914 | 0.482493353 |
| ENSGALG00010029023 | 0.948207778 | 0.34686547  |
| ENSGALG00010029024 | 0.819798795 | 0.199099035 |
| ENSGALG00010029025 | 0.473415435 | 0.206300472 |
| ENSGALG00010029026 | 0.453081598 | 0.284083708 |
| ENSGALG00010029027 | 0.383211517 | 0.152712488 |
| ENSGALG00010029028 | 0.631436966 | 0.437858499 |
| ENSGALG00010029029 | 0.138101678 | 0.223751001 |
| ENSGALG00010029030 | 0.464292879 | 0.521619199 |
| ENSGALG00010029031 | 0.810050852 | 0.266439075 |
| ENSGALG00010029035 | 0.276222946 | 0.413406195 |
| ENSGALG00010029038 | 0.180005877 | 0.055220627 |
| ENSGALG00010029039 | 0.450975048 | 0.209694345 |
| ENSGALG00010029042 | 0.201497347 | 0.289630029 |
| ENSGALG00010029047 | 0.131594986 | 0.150403193 |
| ENSGALG00010029048 | 0.796564942 | 0.37658117  |
| ENSGALG00010029049 | 0.570541241 | 0.31797224  |
| ENSGALG00010029050 | 0.357479516 | 0.140501891 |
| ENSGALG00010029053 | 0.298014721 | 0.246852884 |
| ENSGALG00010029056 | 0.553919903 | 0.379340892 |
| ENSGALG00010029057 | 0.480373529 | 0.01967922  |
| ENSGALG00010029058 | 0.558657554 | 0.003269642 |
| ENSGALG00010029059 | 0.266137114 | 0.107784983 |
| ENSGALG00010029065 | 0.164390601 | 0.253906274 |
| ENSGALG00010029066 | 0.00989989  | 0.414012244 |
| ENSGALG00010029069 | 0.423276176 | 0.613019395 |
| ENSGALG00010029070 | 0.313696025 | 0.350296666 |
| ENSGALG00010029071 | 0.370930594 | 0.701731144 |
| ENSGALG00010029072 | 0.44463987  | 0.22173105  |
| ENSGALG00010029073 | 0.447613441 | 0.524085947 |
| ENSGALG00010029074 | 0.377445378 | 0.160177126 |
| ENSGALG00010029076 | 0.90160722  | 0.191127693 |
| ENSGALG00010029078 | 0.300683727 | 0.461762941 |
| ENSGALG00010029083 | 0.05197934  | 0.14495833  |
| ENSGALG00010029084 | 0.418385807 | 0.202957738 |
| ENSGALG00010029085 | 0.332752772 | 0.064402972 |
| ENSGALG00010029086 | 0.38480368  | 0.180523942 |
| ENSGALG00010029087 | 0.462726142 | 0.107104348 |
| ENSGALG00010029091 | 0.223829944 | 0.334880464 |
| ENSGALG00010029092 | 0.081738198 | 0.084882396 |
| ENSGALG00010029094 | 0.143769036 | 0.164222446 |
| ENSGALG00010029100 | 0.548312897 | 0.099516943 |
| ENSGALG00010029101 | 0.007242584 | 0.179665658 |
| ENSGALG00010029102 | 0.802808539 | 0.413510627 |
| ENSGALG00010029103 | 0.37300765  | 0.246974419 |
| ENSGALG00010029104 | 0.122850389 | 0.45041869  |
| ENSGALG00010029105 | 0.039141949 | 0.214534127 |
| ENSGALG00010029106 | 0.456573993 | 0.062879435 |
| ENSGALG00010029107 | 0.721945569 | 0.244187138 |
| ENSGALG00010029109 | 0.983818776 | 0.334131535 |
| ENSGALG00010029110 | 0.285272007 | 0.109169955 |
| ENSGALG00010029111 | 0.316866425 | 0.158245935 |
| ENSGALG00010029114 | 0.264239718 | 0.073427965 |
| ENSGALG00010029115 | 0.461643443 | 0.006569855 |
| ENSGALG00010029116 | 0.474944767 | 0.095250436 |
| ENSGALG00010029118 | 0.385011888 | 0.139928827 |

|                    |             |             |
|--------------------|-------------|-------------|
| ENSGALG00010029119 | 0.730280825 | 0.239610101 |
| ENSGALG00010029120 | 0.453458843 | 0.187889608 |
| ENSGALG00010029121 | 0.324102667 | 0.023744924 |
| ENSGALG00010029122 | 0.262922434 | 0.138601464 |
| ENSGALG00010029124 | 0.10019489  | 0.316009192 |
| ENSGALG00010029125 | 0.476017749 | 0.17850825  |
| ENSGALG00010029126 | 0.417776658 | 0.081103746 |
| ENSGALG00010029127 | 0.496746903 | 0.024733722 |
| ENSGALG00010029128 | 0.66621252  | 0.303190969 |
| ENSGALG00010029132 | 0.007420952 | 0.120965845 |
| ENSGALG00010029134 | 0.11668492  | 0.19461373  |
| ENSGALG00010029136 | 0.132120601 | 0.175896385 |
| ENSGALG00010029137 | 0.494740301 | 0.258198608 |
| ENSGALG00010029140 | 0.809994521 | 0.298551193 |
| ENSGALG00010029141 | 0.988709152 | 0.314316153 |
| ENSGALG00010029142 | 0.638233944 | 0.319686785 |
| ENSGALG00010029143 | 0.744944869 | 0.22281256  |
| ENSGALG00010029144 | 0.991881937 | 0.296653808 |
| ENSGALG00010029145 | 0.01516189  | 0.13320567  |
| ENSGALG00010029146 | 0.970700383 | 0.339694799 |
| ENSGALG00010029147 | 0.894939905 | 0.2994993   |
| ENSGALG00010029148 | 0.843832015 | 0.360827586 |
| ENSGALG00010029149 | 0.262360613 | 0.235488877 |
| ENSGALG00010029150 | 0.249348091 | 0.113349243 |
| ENSGALG00010029151 | 0.944838329 | 0.180072443 |
| ENSGALG00010029152 | 0.285284598 | 0.406142071 |
| ENSGALG00010029153 | 0.940676418 | 0.361739034 |
| ENSGALG00010029154 | 0.549753698 | 0.402657339 |
| ENSGALG00010029155 | 0.836226773 | 0.518716846 |
| ENSGALG00010029158 | 0.953070051 | 0.275196582 |
| ENSGALG00010029159 | 0.135949415 | 0.000248613 |
| ENSGALG00010029160 | 0.859193621 | 0.299048562 |
| ENSGALG00010029161 | 0.993898242 | 0.336270377 |
| ENSGALG00010029162 | 0.849443431 | 0.489887035 |
| ENSGALG00010029163 | 0.977048155 | 0.267495135 |
| ENSGALG00010029164 | 0.965401846 | 0.344740428 |
| ENSGALG00010029165 | 0.89871675  | 0.209179151 |
| ENSGALG00010029166 | 0.881908447 | 0.26286489  |
| ENSGALG00010029167 | 0.029819876 | 0.115613244 |
| ENSGALG00010029168 | 0.612694238 | 0.16714768  |
| ENSGALG00010029169 | 0.719200548 | 0.379472271 |
| ENSGALG00010029170 | 0.989950672 | 0.27924424  |
| ENSGALG00010029171 | 0.841061032 | 0.236612873 |
| ENSGALG00010029172 | 0.724030438 | 0.124514873 |
| ENSGALG00010029173 | 0.943382319 | 0.33034851  |
| ENSGALG00010029175 | 0.631871146 | 0.0793096   |
| ENSGALG00010029176 | 0.96364414  | 0.253651758 |
| ENSGALG00010029177 | 0.796647838 | 0.252731434 |
| ENSGALG00010029178 | 0.972814649 | 0.297188106 |
| ENSGALG00010029179 | 0.008638603 | 0.404093717 |
| ENSGALG00010029180 | 0.908786125 | 0.295715379 |
| ENSGALG00010029181 | 0.938378248 | 0.248938321 |
| ENSGALG00010029182 | 0.19888029  | 0.549654377 |
| ENSGALG00010029183 | 0.986050205 | 0.375621746 |
| ENSGALG00010029184 | 0.959745243 | 0.34361537  |
| ENSGALG00010029185 | 0.959663245 | 0.338744594 |

|                    |             |             |
|--------------------|-------------|-------------|
| ENSGALG00010029186 | 0.900099644 | 0.319981707 |
| ENSGALG00010029187 | 0.914620069 | 0.509740154 |
| ENSGALG00010029188 | 0.979457493 | 0.378594492 |
| ENSGALG00010029189 | 0.827101461 | 0.277385834 |
| ENSGALG00010029190 | 0.989889648 | 0.310633792 |
| ENSGALG00010029191 | 0.975100978 | 0.308444965 |
| ENSGALG00010029192 | 0.96550911  | 0.350724296 |
| ENSGALG00010029193 | 0.451465204 | 0.128206002 |
| ENSGALG00010029194 | 0.540093666 | 0.019739162 |
| ENSGALG00010029195 | 0.133535385 | 0.23320484  |
| ENSGALG00010029196 | 0.884762045 | 0.328594923 |
| ENSGALG00010029197 | 0.303021111 | 0.156563333 |
| ENSGALG00010029198 | 0.621906136 | 0.352621278 |
| ENSGALG00010029199 | 0.219217366 | 0.5574567   |
| ENSGALG00010029200 | 0.350591321 | 0.039099589 |
| ENSGALG00010029201 | 0.553793219 | 0.130376506 |
| ENSGALG00010029202 | 0.9673714   | 0.313729259 |
| ENSGALG00010029203 | 0.035319214 | 0.390637982 |
| ENSGALG00010029204 | 0.421606057 | 0.124690281 |
| ENSGALG00010029205 | 0.985755867 | 0.319528026 |
| ENSGALG00010029206 | 0.612794338 | 0.252115504 |
| ENSGALG00010029207 | 0.056394145 | 0.343211141 |
| ENSGALG00010029208 | 0.308025201 | 0.07234198  |
| ENSGALG00010029209 | 0.943524943 | 0.279528668 |
| ENSGALG00010029210 | 0.455122004 | 0.035069526 |
| ENSGALG00010029211 | 0.541015114 | 0.393082032 |
| ENSGALG00010029212 | 0.953748356 | 0.283087657 |
| ENSGALG00010029213 | 0.997220432 | 0.318165417 |
| ENSGALG00010029214 | 0.995195275 | 0.318947863 |
| ENSGALG00010029215 | 0.99892395  | 0.327637273 |
| ENSGALG00010029216 | 0.920026788 | 0.335523641 |
| ENSGALG00010029217 | 0.15260558  | 0.217190615 |
| ENSGALG00010029218 | 0.878029615 | 0.301700166 |
| ENSGALG00010029219 | 0.182290514 | 0.043764392 |
| ENSGALG00010029220 | 0.285425135 | 0.016324676 |
| ENSGALG00010029221 | 0.931974747 | 0.353415255 |
| ENSGALG00010029222 | 0.768556466 | 0.242947478 |
| ENSGALG00010029223 | 0.808082202 | 0.370163745 |
| ENSGALG00010029224 | 0.539512166 | 0.118202645 |
| ENSGALG00010029225 | 0.665376765 | 0.352078638 |
| ENSGALG00010029226 | 0.923714022 | 0.275090758 |
| ENSGALG00010029227 | 0.426631115 | 0.302196951 |
| ENSGALG00010029228 | 0.716922185 | 0.094256081 |
| ENSGALG00010029229 | 0.868557997 | 0.150066517 |
| ENSGALG00010029230 | 0.94706583  | 0.380879262 |
| ENSGALG00010029231 | 0.426926433 | 0.176728923 |
| ENSGALG00010029232 | 0.800926146 | 0.283489893 |
| ENSGALG00010029233 | 0.598624142 | 0.440042723 |
| ENSGALG00010029234 | 0.422037886 | 0.238728387 |
| ENSGALG00010029235 | 0.86093373  | 0.246675818 |
| ENSGALG00010029236 | 0.583515313 | 0.179560718 |
| ENSGALG00010029237 | 0.388194624 | 0.175916204 |
| ENSGALG00010029238 | 0.889492655 | 0.358212569 |
| ENSGALG00010029239 | 0.095907681 | 0.418447317 |
| ENSGALG00010029240 | 0.874955377 | 0.422797818 |
| ENSGALG00010029241 | 0.049817691 | 0.215035813 |

|                    |             |             |
|--------------------|-------------|-------------|
| ENSGALG00010029242 | 0.921002761 | 0.367405337 |
| ENSGALG00010029243 | 0.028947784 | 0.017742903 |
| ENSGALG00010029244 | 0.732659654 | 0.130649255 |
| ENSGALG00010029245 | 0.585867347 | 0.041110428 |
| ENSGALG00010029246 | 0.715553499 | 0.139825036 |
| ENSGALG00010029247 | 0.980849193 | 0.348899418 |
| ENSGALG00010029248 | 0.598371231 | 0.185880253 |
| ENSGALG00010029249 | 0.410478445 | 0.130338355 |
| ENSGALG00010029250 | 0.88692493  | 0.342841877 |
| ENSGALG00010029251 | 0.548103956 | 0.215254737 |
| ENSGALG00010029252 | 0.674493304 | 0.138032081 |
| ENSGALG00010029253 | 0.352261695 | 0.077439344 |
| ENSGALG00010029254 | 0.956325023 | 0.347011851 |
| ENSGALG00010029255 | 0.694915518 | 0.108884916 |
| ENSGALG00010029256 | 0.719217435 | 0.007892197 |
| ENSGALG00010029257 | 0.362097152 | 0.096916306 |
| ENSGALG00010029258 | 0.529636464 | 0.119310852 |
| ENSGALG00010029259 | 0.865095777 | 0.178433723 |
| ENSGALG00010029260 | 0.641980954 | 0.195013804 |
| ENSGALG00010029261 | 0.725458062 | 0.197257811 |
| ENSGALG00010029262 | 0.976280094 | 0.285383967 |
| ENSGALG00010029263 | 0.905465474 | 0.285482906 |
| ENSGALG00010029264 | 0.659626039 | 0.314569136 |
| ENSGALG00010029265 | 0.981789345 | 0.315427321 |
| ENSGALG00010029266 | 0.876029988 | 0.417789344 |
| ENSGALG00010029267 | 0.725759261 | 0.257266845 |
| ENSGALG00010029268 | 0.95290615  | 0.249826495 |
| ENSGALG00010029269 | 0.916735154 | 0.396968122 |
| ENSGALG00010029270 | 0.850634039 | 0.441582982 |
| ENSGALG00010029271 | 0.026193426 | 0.299497212 |
| ENSGALG00010029272 | 0.831204692 | 0.087085049 |
| ENSGALG00010029273 | 0.888961126 | 0.146733609 |
| ENSGALG00010029274 | 0.942152266 | 0.203171419 |
| ENSGALG00010029275 | 0.978698482 | 0.326660493 |
| ENSGALG00010029276 | 0.706661014 | 0.293606817 |
| ENSGALG00010029277 | 0.601038405 | 0.254077623 |
| ENSGALG00010029278 | 0.855366681 | 0.261586886 |
| ENSGALG00010029279 | 0.881558795 | 0.290952831 |
| ENSGALG00010029280 | 0.93058034  | 0.315387798 |
| ENSGALG00010029281 | 0.336296958 | 0.249498879 |
| ENSGALG00010029282 | 0.674260577 | 0.381113975 |
| ENSGALG00010029283 | 0.210852824 | 0.339939127 |
| ENSGALG00010029284 | 0.945699421 | 0.31945447  |
| ENSGALG00010029285 | 0.105018858 | 0.014356426 |
| ENSGALG00010029286 | 0.784445298 | 0.320017624 |
| ENSGALG00010029287 | 0.961145465 | 0.342461528 |
| ENSGALG00010029288 | 0.884813464 | 0.240298675 |
| ENSGALG00010029289 | 0.869528824 | 0.195190514 |
| ENSGALG00010029290 | 0.937087405 | 0.247176879 |
| ENSGALG00010029291 | 0.926765013 | 0.307325664 |
| ENSGALG00010029292 | 0.692650615 | 0.125787178 |
| ENSGALG00010029293 | 0.840469612 | 0.381624086 |
| ENSGALG00010029294 | 0.187404371 | 0.118968722 |
| ENSGALG00010029295 | 0.815028248 | 0.367058808 |
| ENSGALG00010029296 | 0.682163534 | 0.142365416 |
| ENSGALG00010029297 | 0.960503625 | 0.314215342 |



|                    |             |             |
|--------------------|-------------|-------------|
| ENSGALG00010029298 | 0.126314084 | 0.271012273 |
| ENSGALG00010029299 | 0.913767996 | 0.346295358 |
| ENSGALG00010029300 | 0.808731648 | 0.243325066 |
| ENSGALG00010029301 | 0.936022963 | 0.383423524 |
| ENSGALG00010029302 | 0.923952367 | 0.395747597 |
| ENSGALG00010029303 | 0.764430354 | 0.227468943 |
| ENSGALG00010029304 | 0.469883057 | 0.487864319 |
| ENSGALG00010029305 | 0.991029133 | 0.351310648 |
| ENSGALG00010029306 | 0.063096039 | 0.072309363 |
| ENSGALG00010029307 | 0.918774345 | 0.339853491 |
| ENSGALG00010029308 | 0.841625014 | 0.366938304 |
| ENSGALG00010029309 | 0.97594425  | 0.273621112 |
| ENSGALG00010029310 | 0.216160673 | 0.192054217 |
| ENSGALG00010029311 | 0.855751639 | 0.15977216  |
| ENSGALG00010029312 | 0.386416735 | 0.10974354  |
| ENSGALG00010029313 | 0.66235366  | 0.21644103  |
| ENSGALG00010029314 | 0.659436748 | 0.271316035 |
| ENSGALG00010029315 | 0.888828306 | 0.268285672 |
| ENSGALG00010029316 | 0.899334897 | 0.371062548 |
| ENSGALG00010029317 | 0.667519842 | 0.13130821  |
| ENSGALG00010029318 | 0.946339409 | 0.39014473  |
| ENSGALG00010029319 | 0.883689442 | 0.015816329 |
| ENSGALG00010029321 | 0.899860301 | 0.149733698 |
| ENSGALG00010029322 | 0.905526461 | 0.331190243 |
| ENSGALG00010029323 | 0.934085789 | 0.166269647 |
| ENSGALG00010029324 | 0.955104805 | 0.345834732 |
| ENSGALG00010029325 | 0.210477708 | 0.351392496 |
| ENSGALG00010029326 | 0.555613282 | 0.442045446 |
| ENSGALG00010029327 | 0.824429744 | 0.260392127 |
| ENSGALG00010029328 | 0.959737879 | 0.336090717 |
| ENSGALG00010029329 | 0.281520391 | 0.237858739 |
| ENSGALG00010029330 | 0.978118323 | 0.375062797 |
| ENSGALG00010029331 | 0.785832885 | 0.161207976 |
| ENSGALG00010029332 | 0.932028271 | 0.200783883 |
| ENSGALG00010029333 | 0.572505202 | 0.032949131 |
| ENSGALG00010029336 | 0.997160552 | 0.348422617 |
| ENSGALG00010029337 | 0.949739061 | 0.289739116 |
| ENSGALG00010029338 | 0.949804487 | 0.297498265 |
| ENSGALG00010029339 | 0.776097663 | 0.187293763 |
| ENSGALG00010029340 | 0.856797526 | 0.262658902 |
| ENSGALG00010029341 | 0.319547257 | 0.223317377 |
| ENSGALG00010029342 | 0.082107063 | 0.174000743 |
| ENSGALG00010029343 | 0.937931984 | 0.282244306 |
| ENSGALG00010029344 | 0.895716438 | 0.16208545  |
| ENSGALG00010029345 | 0.261412418 | 0.083069029 |
| ENSGALG00010029346 | 0.885121303 | 0.261529458 |
| ENSGALG00010029347 | 0.38244303  | 0.126083347 |
| ENSGALG00010029348 | 0.749322918 | 0.241043573 |
| ENSGALG00010029349 | 0.952136342 | 0.231862096 |
| ENSGALG00010029350 | 0.868928309 | 0.342134098 |
| ENSGALG00010029351 | 0.982854244 | 0.28131335  |
| ENSGALG00010029352 | 0.173030078 | 0.06482495  |
| ENSGALG00010029353 | 0.976645018 | 0.278254129 |
| ENSGALG00010029354 | 0.347015121 | 0.336051287 |
| ENSGALG00010029355 | 0.978391376 | 0.310144655 |
| ENSGALG00010029356 | 0.717582264 | 0.114217884 |

|                    |             |             |
|--------------------|-------------|-------------|
| ENSGALG00010029357 | 0.933305179 | 0.193857225 |
| ENSGALG00010029359 | 0.236877526 | 0.13201527  |
| ENSGALG00010029360 | 0.936959532 | 0.294284709 |
| ENSGALG00010029361 | 0.44471812  | 0.265435523 |
| ENSGALG00010029362 | 0.770990329 | 0.212682408 |
| ENSGALG00010029363 | 0.769106971 | 0.424481466 |
| ENSGALG00010029364 | 0.973172983 | 0.415377412 |
| ENSGALG00010029365 | 0.938098104 | 0.317062191 |
| ENSGALG00010029366 | 0.861585085 | 0.376244793 |
| ENSGALG00010029367 | 0.801487907 | 0.054867863 |
| ENSGALG00010029368 | 0.229589011 | 0.585814115 |
| ENSGALG00010029369 | 0.673036286 | 0.420330574 |
| ENSGALG00010029370 | 0.739491179 | 0.37509867  |
| ENSGALG00010029371 | 0.466343761 | 0.337248842 |
| ENSGALG00010029372 | 0.823316881 | 0.163563693 |
| ENSGALG00010029373 | 0.957898711 | 0.286683228 |
| ENSGALG00010029374 | 0.576675461 | 0.285415698 |
| ENSGALG00010029375 | 0.969255832 | 0.323993941 |
| ENSGALG00010029376 | 0.89069278  | 0.401539082 |
| ENSGALG00010029377 | 0.927593371 | 0.281079928 |
| ENSGALG00010029378 | 0.573697331 | 0.438979747 |
| ENSGALG00010029379 | 0.48947446  | 0.003163972 |
| ENSGALG00010029380 | 0.778696451 | 0.375716312 |
| ENSGALG00010029381 | 0.836382543 | 0.346169195 |
| ENSGALG00010029382 | 0.988353374 | 0.308007015 |
| ENSGALG00010029383 | 0.81161633  | 0.37003118  |
| ENSGALG00010029384 | 0.881052685 | 0.055257723 |
| ENSGALG00010029385 | 0.771088078 | 0.544199108 |
| ENSGALG00010029386 | 0.743832438 | 0.415160891 |
| ENSGALG00010029387 | 0.930205064 | 0.224740284 |
| ENSGALG00010029388 | 0.741662948 | 0.19328328  |
| ENSGALG00010029389 | 0.014815925 | 0.283718791 |
| ENSGALG00010029390 | 0.354934685 | 0.343618001 |
| ENSGALG00010029391 | 0.929981838 | 0.278031351 |
| ENSGALG00010029392 | 0.248447067 | 0.048863123 |
| ENSGALG00010029393 | 0.291637091 | 0.096160096 |
| ENSGALG00010029394 | 0.971987471 | 0.394967954 |
| ENSGALG00010029395 | 0.117716651 | 0.35180016  |
| ENSGALG00010029396 | 0.970439553 | 0.324382292 |
| ENSGALG00010029397 | 0.666661333 | 0.422564617 |
| ENSGALG00010029398 | 0.354887295 | 0.335494438 |
| ENSGALG00010029399 | 0.978707916 | 0.28090998  |
| ENSGALG00010029400 | 0.858156381 | 0.330177021 |
| ENSGALG00010029401 | 0.776503048 | 0.268092038 |
| ENSGALG00010029402 | 0.723104072 | 0.227610718 |
| ENSGALG00010029403 | 0.973531834 | 0.306383523 |
| ENSGALG00010029404 | 0.383349556 | 0.308465858 |
| ENSGALG00010029405 | 0.726497674 | 0.13712705  |
| ENSGALG00010029406 | 0.304653396 | 0.075761233 |
| ENSGALG00010029407 | 0.777726276 | 0.126458712 |
| ENSGALG00010029408 | 0.985865216 | 0.353444277 |
| ENSGALG00010029409 | 0.967046596 | 0.289808907 |
| ENSGALG00010029410 | 0.990611573 | 0.306814748 |
| ENSGALG00010029411 | 0.973513434 | 0.290105172 |
| ENSGALG00010029412 | 0.805858103 | 0.180887459 |
| ENSGALG00010029413 | 0.497151878 | 0.184431313 |

|                    |             |             |
|--------------------|-------------|-------------|
| ENSGALG00010029414 | 0.802404966 | 0.30563552  |
| ENSGALG00010029416 | 0.326286323 | 0.130037105 |
| ENSGALG00010029417 | 0.82759108  | 0.251268499 |
| ENSGALG00010029418 | 0.880650469 | 0.296654605 |
| ENSGALG00010029419 | 0.769588531 | 0.23928495  |
| ENSGALG00010029420 | 0.53839665  | 0.343660313 |
| ENSGALG00010029421 | 0.975839697 | 0.278936643 |
| ENSGALG00010029422 | 0.93104502  | 0.257355422 |
| ENSGALG00010029423 | 0.450151842 | 0.049406798 |
| ENSGALG00010029424 | 0.841915434 | 0.368939249 |
| ENSGALG00010029425 | 0.884297043 | 0.353840055 |
| ENSGALG00010029427 | 0.528307017 | 0.181203273 |
| ENSGALG00010029428 | 0.973840632 | 0.384637472 |
| ENSGALG00010029429 | 0.990989359 | 0.298405767 |
| ENSGALG00010029430 | 0.899862067 | 0.379837684 |
| ENSGALG00010029431 | 0.364130097 | 0.168510939 |
| ENSGALG00010029432 | 0.494369564 | 0.164218257 |
| ENSGALG00010029434 | 0.509499309 | 0.420972333 |
| ENSGALG00010029436 | 0.170227232 | 0.012252927 |
| ENSGALG00010029437 | 0.548096646 | 0.16498867  |
| ENSGALG00010029439 | 0.358112066 | 0.164961849 |
| ENSGALG00010029440 | 0.973787883 | 0.247145933 |
| ENSGALG00010029442 | 0.038638171 | 0.109562364 |
| ENSGALG00010029443 | 0.090670275 | 0.261041598 |
| ENSGALG00010029445 | 0.665897109 | 0.369695753 |
| ENSGALG00010029446 | 0.968987974 | 0.245538753 |
| ENSGALG00010029447 | 0.274885481 | 0.169614777 |
| ENSGALG00010029449 | 0.970475289 | 0.258943281 |
| ENSGALG00010029451 | 0.090102811 | 0.295791431 |
| ENSGALG00010029452 | 0.2909684   | 0.148873921 |
| ENSGALG00010029453 | 0.372844675 | 0.121260847 |
| ENSGALG00010029456 | 0.735253355 | 0.424713995 |
| ENSGALG00010029459 | 0.505711214 | 0.23408374  |
| ENSGALG00010029463 | 0.05197934  | 0.14495833  |
| ENSGALG00010029465 | 0.264086386 | 0.150531706 |
| ENSGALG00010029466 | 0.957385211 | 0.186526233 |
| ENSGALG00010029467 | 0.348489793 | 0.158514494 |
| ENSGALG00010029469 | 0.395418784 | 0.135316935 |
| ENSGALG00010029470 | 0.595369388 | 0.305111527 |
| ENSGALG00010029473 | 0.929445523 | 0.206411483 |
| ENSGALG00010029474 | 0.061332302 | 0.385743211 |
| ENSGALG00010029475 | 0.296726552 | 0.12798907  |
| ENSGALG00010029476 | 0.360302963 | 0.034133254 |
| ENSGALG00010029477 | 0.697281771 | 0.087636018 |
| ENSGALG00010029478 | 0.369586233 | 0.175264494 |
| ENSGALG00010029479 | 0.026013658 | 0.201342713 |
| ENSGALG00010029480 | 0.076687646 | 0.231573049 |
| ENSGALG00010029481 | 0.384893753 | 0.071722217 |
| ENSGALG00010029482 | 0.821829984 | 0.097302883 |
| ENSGALG00010029483 | 0.229565439 | 0.252046404 |
| ENSGALG00010029484 | 0.703560225 | 0.15439048  |
| ENSGALG00010029486 | 0.568204855 | 0.246630293 |
| ENSGALG00010029487 | 0.431385704 | 0.175633551 |
| ENSGALG00010029488 | 0.737688716 | 0.262881879 |
| ENSGALG00010029489 | 0.42642119  | 0.122522338 |
| ENSGALG00010029490 | 0.203991683 | 0.058221925 |

|                    |             |             |
|--------------------|-------------|-------------|
| ENSGALG00010029491 | 0.572057954 | 0.289273991 |
| ENSGALG00010029492 | 0.630149953 | 0.446748666 |
| ENSGALG00010029494 | 0.084879627 | 0.073141606 |
| ENSGALG00010029495 | 0.936421338 | 0.301388366 |
| ENSGALG00010029496 | 0.585131293 | 0.469470978 |
| ENSGALG00010029497 | 0.032345365 | 0.334658117 |
| ENSGALG00010029498 | 0.953258309 | 0.361046138 |
| ENSGALG00010029499 | 0.569296062 | 0.228185068 |
| ENSGALG00010029500 | 0.277566769 | 0.107857127 |
| ENSGALG00010029501 | 0.062039976 | 0.134108662 |
| ENSGALG00010029502 | 0.515473214 | 0.395405172 |
| ENSGALG00010029503 | 0.266135033 | 0.10195952  |
| ENSGALG00010029504 | 0.566443797 | 0.123466428 |
| ENSGALG00010029505 | 0.968166068 | 0.234522686 |
| ENSGALG00010029506 | 0.627849049 | 0.046221486 |
| ENSGALG00010029507 | 0.382982725 | 0.066000061 |
| ENSGALG00010029508 | 0.257752143 | 0.306620164 |
| ENSGALG00010029509 | 0.937233615 | 0.362589504 |
| ENSGALG00010029510 | 0.121214993 | 0.131654747 |
| ENSGALG00010029511 | 0.962550538 | 0.311609701 |
| ENSGALG00010029512 | 0.932854772 | 0.290197856 |
| ENSGALG00010029513 | 0.295314363 | 0.052564455 |
| ENSGALG00010029514 | 0.965858513 | 0.339405559 |
| ENSGALG00010029515 | 0.966650769 | 0.344256203 |
| ENSGALG00010029516 | 0.971943431 | 0.361430464 |
| ENSGALG00010029517 | 0.966286951 | 0.223775747 |
| ENSGALG00010029518 | 0.521646979 | 0.210628976 |
| ENSGALG00010029519 | 0.434516781 | 0.076508357 |
| ENSGALG00010029520 | 0.807693478 | 0.206145068 |
| ENSGALG00010029521 | 0.45402556  | 0.028215975 |
| ENSGALG00010029522 | 0.722953661 | 0.379128089 |
| ENSGALG00010029523 | 0.515218569 | 0.750526749 |
| ENSGALG00010029524 | 0.957146225 | 0.259047816 |
| ENSGALG00010029525 | 0.980714679 | 0.263190064 |
| ENSGALG00010029526 | 0.982020314 | 0.357646589 |
| ENSGALG00010029527 | 0.977045088 | 0.313971162 |
| ENSGALG00010029528 | 0.532717117 | 0.4749944   |
| ENSGALG00010029529 | 0.599920746 | 0.329729189 |
| ENSGALG00010029530 | 0.984338765 | 0.386445356 |
| ENSGALG00010029531 | 0.952146393 | 0.269886431 |
| ENSGALG00010029532 | 0.723711551 | 0.12222211  |
| ENSGALG00010029533 | 0.946073606 | 0.283586021 |
| ENSGALG00010029534 | 0.931608848 | 0.27235028  |
| ENSGALG00010029536 | 0.95530849  | 0.314820188 |
| ENSGALG00010029537 | 0.984617241 | 0.326837298 |
| ENSGALG00010029538 | 0.775472075 | 0.27727794  |
| ENSGALG00010029539 | 0.222778    | 0.14046234  |
| ENSGALG00010029540 | 0.102362161 | 0.104164023 |
| ENSGALG00010029541 | 0.978134655 | 0.317011959 |
| ENSGALG00010029542 | 0.628933055 | 0.080416398 |
| ENSGALG00010029543 | 0.845951787 | 0.339753034 |
| ENSGALG00010029544 | 0.882687397 | 0.335960074 |
| ENSGALG00010029545 | 0.738779747 | 0.002153666 |
| ENSGALG00010029546 | 0.957172041 | 0.33848504  |
| ENSGALG00010029547 | 0.984840743 | 0.318301002 |
| ENSGALG00010029548 | 0.984166834 | 0.333595347 |

|                    |             |             |
|--------------------|-------------|-------------|
| ENSGALG00010029549 | 0.916746786 | 0.317105635 |
| ENSGALG00010029550 | 0.958053094 | 0.328520052 |
| ENSGALG00010029552 | 0.791104586 | 0.226860457 |
| ENSGALG00010029553 | 0.985701039 | 0.330137903 |
| ENSGALG00010029554 | 0.981807108 | 0.315939797 |
| ENSGALG00010029555 | 0.205650116 | 0.322334566 |
| ENSGALG00010029556 | 0.901865358 | 0.315686418 |
| ENSGALG00010029557 | 0.99413505  | 0.336099963 |
| ENSGALG00010029558 | 0.880460169 | 0.241041517 |
| ENSGALG00010029559 | 0.91595601  | 0.419228024 |
| ENSGALG00010029560 | 0.7575435   | 0.196735602 |
| ENSGALG00010029561 | 0.346021511 | 0.369462447 |
| ENSGALG00010029562 | 0.722450394 | 0.412946245 |
| ENSGALG00010029563 | 0.616969383 | 0.444590879 |
| ENSGALG00010029564 | 0.719022763 | 0.320294024 |
| ENSGALG00010029565 | 0.397725943 | 0.173871128 |
| ENSGALG00010029566 | 0.984394125 | 0.362220664 |
| ENSGALG00010029567 | 0.982092049 | 0.329582978 |
| ENSGALG00010029568 | 0.178108277 | 0.124234799 |
| ENSGALG00010029569 | 0.849921222 | 0.262024598 |
| ENSGALG00010029570 | 0.932398585 | 0.376308922 |
| ENSGALG00010029571 | 0.906491966 | 0.248867545 |
| ENSGALG00010029572 | 0.504909531 | 0.312361421 |
| ENSGALG00010029573 | 0.921162088 | 0.277067154 |
| ENSGALG00010029574 | 0.758266409 | 0.134484667 |
| ENSGALG00010029575 | 0.353460169 | 0.153659574 |
| ENSGALG00010029576 | 0.892858988 | 0.111266538 |
| ENSGALG00010029577 | 0.105614442 | 0.105420647 |
| ENSGALG00010029578 | 0.423670969 | 0.253752419 |
| ENSGALG00010029579 | 0.5867965   | 0.436556664 |
| ENSGALG00010029580 | 0.880643402 | 0.08582166  |
| ENSGALG00010029581 | 0.853755025 | 0.271203933 |
| ENSGALG00010029582 | 0.988813204 | 0.287259219 |
| ENSGALG00010029583 | 0.914100586 | 0.300953985 |
| ENSGALG00010029584 | 0.979234444 | 0.367539545 |
| ENSGALG00010029585 | 0.686688883 | 0.41250708  |
| ENSGALG00010029586 | 0.854110646 | 0.325112357 |
| ENSGALG00010029587 | 0.064059294 | 0.306337965 |
| ENSGALG00010029588 | 0.965386313 | 0.318082597 |
| ENSGALG00010029589 | 0.144560807 | 0.137212893 |
| ENSGALG00010029590 | 0.731479905 | 0.059959051 |
| ENSGALG00010029591 | 0.939968926 | 0.40062819  |
| ENSGALG00010029592 | 0.164341713 | 0.058562557 |
| ENSGALG00010029593 | 0.928768888 | 0.334291596 |
| ENSGALG00010029594 | 0.979064313 | 0.253504255 |
| ENSGALG00010029595 | 0.889630914 | 0.343488753 |
| ENSGALG00010029596 | 0.95102668  | 0.317264072 |
| ENSGALG00010029597 | 0.965961857 | 0.305318349 |
| ENSGALG00010029598 | 0.139172544 | 0.119786931 |
| ENSGALG00010029599 | 0.994126471 | 0.360679418 |
| ENSGALG00010029600 | 0.912427531 | 0.246418344 |
| ENSGALG00010029601 | 0.895859325 | 0.273574544 |
| ENSGALG00010029602 | 0.981368804 | 0.406397479 |
| ENSGALG00010029603 | 0.139316547 | 0.121525453 |
| ENSGALG00010029604 | 0.896881416 | 0.265457597 |
| ENSGALG00010029605 | 0.946489343 | 0.343811363 |

|                    |             |             |
|--------------------|-------------|-------------|
| ENSGALG00010029606 | 0.576247137 | 0.238750469 |
| ENSGALG00010029607 | 0.538275946 | 0.117753848 |
| ENSGALG00010029608 | 0.9793059   | 0.370977895 |
| ENSGALG00010029609 | 0.949946557 | 0.439563005 |
| ENSGALG00010029610 | 0.985589659 | 0.305617132 |
| ENSGALG00010029611 | 0.971978797 | 0.32733802  |
| ENSGALG00010029612 | 0.988867994 | 0.32105186  |
| ENSGALG00010029613 | 0.353767897 | 0.186851719 |
| ENSGALG00010029614 | 0.930115671 | 0.305615211 |
| ENSGALG00010029615 | 0.56614739  | 0.332793814 |
| ENSGALG00010029616 | 0.965803044 | 0.347048975 |
| ENSGALG00010029617 | 0.982603832 | 0.326566227 |
| ENSGALG00010029618 | 0.924184058 | 0.14621009  |
| ENSGALG00010029619 | 0.875961462 | 0.397391212 |
| ENSGALG00010029620 | 0.692899444 | 0.259612608 |
| ENSGALG00010029621 | 0.080604005 | 0.142749464 |
| ENSGALG00010029622 | 0.964714182 | 0.358601689 |
| ENSGALG00010029623 | 0.732922526 | 0.286611107 |
| ENSGALG00010029624 | 0.553524565 | 0.059085326 |
| ENSGALG00010029625 | 0.383290923 | 0.228090811 |
| ENSGALG00010029626 | 0.092131694 | 0.031403681 |
| ENSGALG00010029627 | 0.289908941 | 0.060469215 |
| ENSGALG00010029628 | 0.995316391 | 0.330749356 |
| ENSGALG00010029629 | 0.835413178 | 0.434729396 |
| ENSGALG00010029630 | 0.022664457 | 0.033414052 |
| ENSGALG00010029631 | 0.86390738  | 0.486958628 |
| ENSGALG00010029632 | 0.953000563 | 0.340092547 |
| ENSGALG00010029633 | 0.743607491 | 0.295516909 |
| ENSGALG00010029634 | 0.986584122 | 0.337278036 |
| ENSGALG00010029635 | 0.926711889 | 0.28650608  |
| ENSGALG00010029636 | 0.883690597 | 0.270699199 |
| ENSGALG00010029638 | 0.964410834 | 0.286849895 |
| ENSGALG00010029639 | 0.067004358 | 0.159893419 |
| ENSGALG00010029641 | 0.429964376 | 0.167835486 |
| ENSGALG00010029642 | 0.98823935  | 0.339999874 |
| ENSGALG00010029643 | 0.277566769 | 0.107857127 |
| ENSGALG00010029644 | 0.211967288 | 0.186486131 |
| ENSGALG00010029645 | 0.535575212 | 0.109766377 |
| ENSGALG00010029646 | 0.923232147 | 0.337330869 |
| ENSGALG00010029647 | 0.786378825 | 0.195655639 |
| ENSGALG00010029648 | 0.954146995 | 0.299373224 |
| ENSGALG00010029649 | 0.980519367 | 0.33124782  |
| ENSGALG00010029650 | 0.976603057 | 0.335848751 |
| ENSGALG00010029651 | 0.923636373 | 0.363047471 |
| ENSGALG00010029652 | 0.723259734 | 0.088943588 |
| ENSGALG00010029653 | 0.98630906  | 0.335562515 |
| ENSGALG00010029654 | 0.914447301 | 0.321867915 |
| ENSGALG00010029655 | 0.998949766 | 0.332091847 |
| ENSGALG00010029656 | 0.974860017 | 0.300704733 |
| ENSGALG00010029657 | 0.984085278 | 0.349975437 |
| ENSGALG00010029658 | 0.481477    | 0.303834297 |
| ENSGALG00010029659 | 0.891429633 | 0.20349327  |
| ENSGALG00010029660 | 0.937925855 | 0.193468917 |
| ENSGALG00010029661 | 0.617711969 | 0.032243239 |
| ENSGALG00010029662 | 0.549245171 | 0.193332842 |
| ENSGALG00010029663 | 0.979687017 | 0.256405297 |

|                    |             |             |
|--------------------|-------------|-------------|
| ENSGALG00010029664 | 0.95946444  | 0.240207791 |
| ENSGALG00010029665 | 0.890932049 | 0.101476927 |
| ENSGALG00010029666 | 0.979497017 | 0.35802556  |
| ENSGALG00010029667 | 0.792418338 | 0.218868137 |
| ENSGALG00010029668 | 0.91464091  | 0.168717    |
| ENSGALG00010029669 | 0.753718308 | 0.362825839 |
| ENSGALG00010029670 | 0.972692887 | 0.318693142 |
| ENSGALG00010029671 | 0.681816794 | 0.404037534 |
| ENSGALG00010029672 | 0.5971229   | 0.284720316 |
| ENSGALG00010029673 | 0.9040481   | 0.289165293 |
| ENSGALG00010029674 | 0.961735161 | 0.331588739 |
| ENSGALG00010029675 | 0.909761144 | 0.164277892 |
| ENSGALG00010029676 | 0.99167741  | 0.339098601 |
| ENSGALG00010029677 | 0.856641707 | 0.133037457 |
| ENSGALG00010029679 | 0.948249763 | 0.339288626 |
| ENSGALG00010029680 | 0.884839882 | 0.312822911 |
| ENSGALG00010029681 | 0.565241436 | 0.275769557 |
| ENSGALG00010029682 | 0.620424513 | 0.431351966 |
| ENSGALG00010029683 | 0.932095036 | 0.278544979 |
| ENSGALG00010029684 | 0.691449381 | 0.20609873  |
| ENSGALG00010029685 | 0.78606913  | 0.305829756 |
| ENSGALG00010029686 | 0.695450315 | 0.205895444 |
| ENSGALG00010029687 | 0.989376421 | 0.350463601 |
| ENSGALG00010029688 | 0.985562303 | 0.300328155 |
| ENSGALG00010029689 | 0.983224145 | 0.294185703 |
| ENSGALG00010029690 | 0.9790953   | 0.324099489 |
| ENSGALG00010029691 | 0.07097039  | 0.086666223 |
| ENSGALG00010029692 | 0.553862524 | 0.460490662 |
| ENSGALG00010029693 | 0.608527171 | 0.443603669 |
| ENSGALG00010029694 | 0.295349069 | 0.091739094 |
| ENSGALG00010029695 | 0.533017513 | 0.165157425 |
| ENSGALG00010029696 | 0.7112329   | 0.028488445 |
| ENSGALG00010029697 | 0.985131659 | 0.306614098 |
| ENSGALG00010029698 | 0.957689124 | 0.344568747 |
| ENSGALG00010029699 | 0.978338313 | 0.336481843 |
| ENSGALG00010029700 | 0.962179114 | 0.379520956 |
| ENSGALG00010029701 | 0.671908065 | 0.249084839 |
| ENSGALG00010029702 | 0.983092795 | 0.338516457 |
| ENSGALG00010029703 | 0.953286015 | 0.367457819 |
| ENSGALG00010029704 | 0.504760521 | 0.23238702  |
| ENSGALG00010029705 | 0.898562355 | 0.305571035 |
| ENSGALG00010029706 | 0.950394857 | 0.22016055  |
| ENSGALG00010029707 | 0.196599738 | 0.053299441 |
| ENSGALG00010029708 | 0.613949329 | 0.10678424  |
| ENSGALG00010029709 | 0.951990415 | 0.305695818 |
| ENSGALG00010029710 | 0.955766059 | 0.222673216 |
| ENSGALG00010029711 | 0.723258967 | 0.106970104 |
| ENSGALG00010029712 | 0.2991341   | 0.047692132 |
| ENSGALG00010029713 | 0.808008374 | 0.110013799 |
| ENSGALG00010029715 | 0.755936788 | 0.265900391 |
| ENSGALG00010029716 | 0.862375725 | 0.364114768 |
| ENSGALG00010029717 | 0.564447972 | 0.174835608 |
| ENSGALG00010029718 | 0.643756177 | 0.013090941 |
| ENSGALG00010029719 | 0.660198961 | 0.210405758 |
| ENSGALG00010029720 | 0.876717055 | 0.181644501 |
| ENSGALG00010029721 | 0.791386456 | 0.192735235 |

|                    |             |             |
|--------------------|-------------|-------------|
| ENSGALG00010029722 | 0.957110914 | 0.188538106 |
| ENSGALG00010029723 | 0.066558328 | 0.0795024   |
| ENSGALG00010029724 | 0.659032863 | 0.23793205  |
| ENSGALG00010029725 | 0.850379544 | 0.188025413 |
| ENSGALG00010029726 | 0.102946481 | 0.422305277 |
| ENSGALG00010029727 | 0.884915543 | 0.231452051 |
| ENSGALG00010029728 | 0.823329964 | 0.231283686 |
| ENSGALG00010029730 | 0.939438847 | 0.177839851 |
| ENSGALG00010029731 | 0.630587136 | 0.057365575 |
| ENSGALG00010029732 | 0.570524881 | 0.282084471 |
| ENSGALG00010029733 | 0.960839061 | 0.303574135 |
| ENSGALG00010029734 | 0.912564651 | 0.248943793 |
| ENSGALG00010029735 | 0.645160486 | 0.416899512 |
| ENSGALG00010029736 | 0.635336226 | 0.198390919 |
| ENSGALG00010029737 | 0.80546896  | 0.508744708 |
| ENSGALG00010029738 | 0.791834541 | 0.55019744  |
| ENSGALG00010029739 | 0.851466477 | 0.225160503 |
| ENSGALG00010029740 | 0.481962646 | 0.321881709 |
| ENSGALG00010029741 | 0.978772002 | 0.28491992  |
| ENSGALG00010029742 | 0.902982461 | 0.184725063 |
| ENSGALG00010029743 | 0.990447602 | 0.319475667 |
| ENSGALG00010029744 | 0.127581942 | 0.112069311 |
| ENSGALG00010029745 | 0.935113877 | 0.445646255 |
| ENSGALG00010029746 | 0.178786633 | 0.157251584 |
| ENSGALG00010029747 | 0.095074944 | 0.376673614 |
| ENSGALG00010029748 | 0.991955861 | 0.345137803 |
| ENSGALG00010029749 | 0.573029552 | 0.264574624 |
| ENSGALG00010029750 | 0.908944496 | 0.347408226 |
| ENSGALG00010029751 | 0.749925956 | 0.249238092 |
| ENSGALG00010029752 | 0.162948555 | 0.108866622 |
| ENSGALG00010029753 | 0.934153459 | 0.399166916 |
| ENSGALG00010029754 | 0.81368558  | 0.380113799 |
| ENSGALG00010029755 | 0.98879695  | 0.338230868 |
| ENSGALG00010029756 | 0.304875474 | 0.144074166 |
| ENSGALG00010029757 | 0.923256595 | 0.298429498 |
| ENSGALG00010029758 | 0.084656592 | 0.141693424 |
| ENSGALG00010029759 | 0.975329139 | 0.329063429 |
| ENSGALG00010029761 | 0.799116051 | 0.329210711 |
| ENSGALG00010029762 | 0.76117642  | 0.140620643 |
| ENSGALG00010029763 | 0.51534521  | 0.048273123 |
| ENSGALG00010029764 | 0.81486154  | 0.28467014  |
| ENSGALG00010029765 | 0.339321283 | 0.243147379 |
| ENSGALG00010029766 | 0.900371865 | 0.276194936 |
| ENSGALG00010029767 | 0.922013614 | 0.338145274 |
| ENSGALG00010029768 | 0.971851037 | 0.353715855 |
| ENSGALG00010029769 | 0.068967245 | 0.000587985 |
| ENSGALG00010029770 | 0.370843422 | 0.342049638 |
| ENSGALG00010029771 | 0.664526599 | 0.192990407 |
| ENSGALG00010029772 | 0.760693661 | 0.02481403  |
| ENSGALG00010029773 | 0.913812966 | 0.391341523 |
| ENSGALG00010029774 | 0.982804086 | 0.312708401 |
| ENSGALG00010029775 | 0.892562942 | 0.167865458 |
| ENSGALG00010029776 | 0.97032975  | 0.34957846  |
| ENSGALG00010029777 | 0.899345163 | 0.153261652 |
| ENSGALG00010029778 | 0.462614994 | 0.302062805 |
| ENSGALG00010029780 | 0.406491347 | 0.346953861 |



|                    |             |             |
|--------------------|-------------|-------------|
| ENSGALG00010029781 | 0.949796825 | 0.368258118 |
| ENSGALG00010029782 | 0.660806056 | 0.17013627  |
| ENSGALG00010029783 | 0.140888165 | 0.047638098 |
| ENSGALG00010029784 | 0.975978899 | 0.311095856 |
| ENSGALG00010029785 | 0.997479405 | 0.327130528 |
| ENSGALG00010029786 | 0.998131827 | 0.331919977 |
| ENSGALG00010029787 | 0.936374746 | 0.22467007  |
| ENSGALG00010029788 | 0.785202706 | 0.233551649 |
| ENSGALG00010029790 | 0.065158438 | 0.217455258 |
| ENSGALG00010029791 | 0.920092929 | 0.196942673 |
| ENSGALG00010029792 | 0.08849734  | 0.252962123 |
| ENSGALG00010029793 | 0.238022712 | 0.095493128 |
| ENSGALG00010029794 | 0.382985366 | 0.1291087   |
| ENSGALG00010029795 | 0.383041837 | 0.148092965 |
| ENSGALG00010029796 | 0.857610095 | 0.502617149 |
| ENSGALG00010029797 | 0.818936978 | 0.271026599 |
| ENSGALG00010029798 | 0.330589625 | 0.32753095  |
| ENSGALG00010029801 | 0.714285371 | 0.009316713 |
| ENSGALG00010029802 | 0.265558089 | 0.028821141 |
| ENSGALG00010029804 | 0.418403859 | 0.137262211 |
| ENSGALG00010029805 | 0.437101788 | 0.120409956 |
| ENSGALG00010029806 | 0.701625928 | 0.313395722 |
| ENSGALG00010029807 | 0.28050743  | 0.185921568 |
| ENSGALG00010029808 | 0.426866692 | 0.538467599 |
| ENSGALG00010029809 | 0.000957769 | 0.339665072 |
| ENSGALG00010029810 | 0.804002542 | 0.076246751 |
| ENSGALG00010029811 | 0.780542968 | 0.122255382 |
| ENSGALG00010029812 | 0.025122514 | 0.626982856 |
| ENSGALG00010029813 | 0.58139716  | 0.534111761 |
| ENSGALG00010029814 | 0.799314364 | 0.249033611 |
| ENSGALG00010029815 | 0.836051824 | 0.220289839 |
| ENSGALG00010029816 | 0.664155278 | 0.266036686 |
| ENSGALG00010029817 | 0.891454072 | 0.327708327 |
| ENSGALG00010029818 | 0.936478481 | 0.326534776 |
| ENSGALG00010029819 | 0.2430798   | 0.207668055 |
| ENSGALG00010029820 | 0.387374433 | 0.109360451 |
| ENSGALG00010029823 | 0.311997177 | 0.424590371 |
| ENSGALG00010029827 | 0.298598643 | 0.256694648 |
| ENSGALG00010029828 | 0.500406649 | 0.182616804 |
| ENSGALG00010029834 | 0.242704765 | 0.126598106 |
| ENSGALG00010029835 | 0.907340973 | 0.44214869  |
| ENSGALG00010029836 | 0.739378944 | 0.011752061 |
| ENSGALG00010029837 | 0.982429247 | 0.330425634 |
| ENSGALG00010029839 | 0.349898801 | 0.27603925  |
| ENSGALG00010029841 | 0.475537496 | 0.378349006 |
| ENSGALG00010029844 | 0.581247037 | 0.200158436 |
| ENSGALG00010029845 | 0.470810233 | 0.309523015 |
| ENSGALG00010029847 | 0.586553086 | 0.37973285  |
| ENSGALG00010029850 | 0.626542268 | 0.06388599  |
| ENSGALG00010029854 | 0.277566769 | 0.107857127 |
| ENSGALG00010029856 | 0.963807909 | 0.241124139 |
| ENSGALG00010029857 | 0.906300766 | 0.333228107 |
| ENSGALG00010029858 | 0.785725497 | 0.516767646 |
| ENSGALG00010029859 | 0.83546448  | 0.295804857 |
| ENSGALG00010029860 | 0.288784432 | 0.238149581 |
| ENSGALG00010029861 | 0.826596895 | 0.251948412 |

|                    |             |             |
|--------------------|-------------|-------------|
| ENSGALG00010029862 | 0.676118961 | 0.024427399 |
| ENSGALG00010029863 | 0.692681928 | 0.026920455 |
| ENSGALG00010029864 | 0.911316249 | 0.389108763 |
| ENSGALG00010029865 | 0.212856342 | 0.113526745 |
| ENSGALG00010029866 | 0.034122929 | 0.043157565 |
| ENSGALG00010029867 | 0.075864242 | 0.032286247 |
| ENSGALG00010029868 | 0.028716272 | 0.17724602  |
| ENSGALG00010029869 | 0.633118691 | 0.162596501 |
| ENSGALG00010029871 | 0.208550923 | 0.676301294 |
| ENSGALG00010029873 | 0.271162407 | 0.118740615 |
| ENSGALG00010029876 | 0.508627651 | 0.218138437 |
| ENSGALG00010029878 | 0.604595787 | 0.268337389 |
| ENSGALG00010029879 | 0.777330867 | 0.371494779 |
| ENSGALG00010029880 | 0.010534108 | 0.108510093 |
| ENSGALG00010029881 | 0.41596524  | 0.187579552 |
| ENSGALG00010029882 | 0.219386918 | 0.079388121 |
| ENSGALG00010029883 | 0.528736459 | 0.61536648  |
| ENSGALG00010029884 | 0.72105419  | 0.416249342 |
| ENSGALG00010029885 | 0.230386193 | 0.091602208 |
| ENSGALG00010029886 | 0.181275072 | 0.251143049 |
| ENSGALG00010029887 | 0.786213248 | 0.327410698 |
| ENSGALG00010029888 | 0.249675719 | 0.319212827 |
| ENSGALG00010029889 | 0.275125424 | 0.126154882 |
| ENSGALG00010029892 | 0.476636619 | 0.28042731  |
| ENSGALG00010029893 | 0.559440921 | 0.176551736 |
| ENSGALG00010029894 | 0.377096693 | 0.134016806 |
| ENSGALG00010029895 | 0.975242098 | 0.294908674 |
| ENSGALG00010029897 | 0.206911318 | 0.115213763 |
| ENSGALG00010029898 | 0.270451009 | 0.090541667 |
| ENSGALG00010029899 | 0.382448095 | 0.094032633 |
| ENSGALG00010029901 | 0.285272007 | 0.109169955 |
| ENSGALG00010029903 | 0.833852274 | 0.187553682 |
| ENSGALG00010029904 | 0.25153872  | 0.017020562 |
| ENSGALG00010029907 | 0.905687956 | 0.266725071 |
| ENSGALG00010029909 | 0.63529269  | 0.198965251 |
| ENSGALG00010029914 | 0.390466756 | 0.106163828 |
| ENSGALG00010029916 | 0.81081909  | 0.300721096 |
| ENSGALG00010029920 | 0.266137114 | 0.107784983 |
| ENSGALG00010029921 | 0.785102578 | 0.187893556 |
| ENSGALG00010029923 | 0.459194924 | 0.139014987 |
| ENSGALG00010029924 | 0.187555343 | 0.194535423 |
| ENSGALG00010029925 | 0.104345636 | 0.078743762 |
| ENSGALG00010029926 | 0.730431408 | 0.075227096 |
| ENSGALG00010029927 | 0.054717168 | 0.37877297  |
| ENSGALG00010029928 | 0.686766021 | 0.408688922 |
| ENSGALG00010029929 | 0.093350038 | 0.109304197 |
| ENSGALG00010029930 | 0.109168363 | 0.225682899 |
| ENSGALG00010029932 | 0.239260536 | 0.186256372 |
| ENSGALG00010029933 | 0.929350179 | 0.243010289 |
| ENSGALG00010029934 | 0.088797653 | 0.357122107 |
| ENSGALG00010029935 | 0.154958561 | 0.342899367 |
| ENSGALG00010029936 | 0.992920323 | 0.305973123 |
| ENSGALG00010029937 | 0.953807656 | 0.305115733 |
| ENSGALG00010029938 | 0.983207766 | 0.281005046 |
| ENSGALG00010029939 | 0.043367435 | 0.54588566  |
| ENSGALG00010029941 | 0.816544072 | 0.288573728 |

|                    |             |             |
|--------------------|-------------|-------------|
| ENSGALG00010029943 | 0.419258983 | 0.210904094 |
| ENSGALG00010029944 | 0.144515293 | 0.311748346 |
| ENSGALG00010029945 | 0.492239349 | 0.30102198  |
| ENSGALG00010029946 | 0.821476518 | 0.432083936 |
| ENSGALG00010029947 | 0.796672625 | 0.363427116 |
| ENSGALG00010029948 | 0.987355338 | 0.354485627 |
| ENSGALG00010029950 | 0.966089682 | 0.308533708 |
| ENSGALG00010029951 | 0.944073113 | 0.367531113 |
| ENSGALG00010029952 | 0.099921756 | 0.261213653 |
| ENSGALG00010029953 | 0.790518263 | 0.410172502 |
| ENSGALG00010029956 | 0.98483516  | 0.337671089 |
| ENSGALG00010029957 | 0.985608097 | 0.293505707 |
| ENSGALG00010029958 | 0.981814006 | 0.28174133  |
| ENSGALG00010029959 | 0.981874325 | 0.330401523 |
| ENSGALG00010029960 | 0.019712204 | 0.418846563 |
| ENSGALG00010029962 | 0.430182133 | 0.052554495 |
| ENSGALG00010029966 | 0.418583343 | 0.253436761 |
| ENSGALG00010029967 | 0.39190877  | 0.131701825 |
| ENSGALG00010029968 | 0.285272007 | 0.109169955 |
| ENSGALG00010029978 | 0.375157217 | 0.295541278 |
| ENSGALG00010029983 | 0.483999928 | 0.154434277 |
| ENSGALG00010029984 | 0.888721302 | 0.31904481  |
| ENSGALG00010029987 | 0.418023482 | 0.260249685 |
| ENSGALG00010029988 | 0.643939703 | 0.305192965 |
| ENSGALG00010029990 | 0.265842936 | 0.058628392 |
| ENSGALG00010029991 | 0.538752987 | 0.320278859 |
| ENSGALG00010029995 | 0.945645706 | 0.162554554 |
| ENSGALG00010029997 | 0.94280447  | 0.311098534 |
| ENSGALG00010030001 | 0.544232447 | 0.025189088 |
| ENSGALG00010030002 | 0.56977859  | 0.067115863 |
| ENSGALG00010030003 | 0.53813553  | 0.329636751 |
| ENSGALG00010030004 | 0.949544811 | 0.393962156 |
| ENSGALG00010030005 | 0.117150563 | 0.27518886  |
| ENSGALG00010030006 | 0.398498509 | 0.49303674  |
| ENSGALG00010030007 | 0.255492709 | 0.101879462 |
| ENSGALG00010030008 | 0.908686375 | 0.33897134  |
| ENSGALG00010030012 | 0.712184303 | 0.273427504 |
| ENSGALG00010030013 | 0.303768277 | 0.18293581  |
| ENSGALG00010030014 | 0.893464387 | 0.341746497 |
| ENSGALG00010030016 | 0.981356994 | 0.293312669 |
| ENSGALG00010030017 | 0.148948063 | 0.268126765 |
| ENSGALG00010030019 | 0.339444113 | 0.045741665 |
| ENSGALG00010030021 | 0.278434714 | 0.327665487 |
| ENSGALG00010030026 | 0.121386485 | 0.19735015  |
| ENSGALG00010030027 | 0.775227756 | 0.149829211 |
| ENSGALG00010030029 | 0.045230036 | 0.275555838 |
| ENSGALG00010030041 | 0.322415465 | 0.246520801 |
| ENSGALG00010030042 | 0.662903744 | 0.415586347 |
| ENSGALG00010030043 | 0.577744561 | 0.209142794 |
| ENSGALG00010030044 | 0.353136475 | 0.236486821 |
| ENSGALG00010030045 | 0.266137114 | 0.107784983 |
| ENSGALG00010030046 | 0.102206405 | 0.249375097 |
| ENSGALG00010030047 | 0.947420611 | 0.404980986 |
| ENSGALG00010030048 | 0.640987691 | 0.138551271 |
| ENSGALG00010030049 | 0.932167086 | 0.360781167 |
| ENSGALG00010030052 | 0.816828571 | 0.390570912 |

|                    |             |             |
|--------------------|-------------|-------------|
| ENSGALG00010030053 | 0.886967454 | 0.406331887 |
| ENSGALG00010030062 | 0.277566769 | 0.107857127 |
| ENSGALG00010030063 | 0.591182869 | 0.123954105 |
| ENSGALG00010030064 | 0.379129433 | 0.232100788 |
| ENSGALG00010030066 | 0.646258753 | 0.031483691 |
| ENSGALG00010030068 | 0.523699346 | 0.09038894  |
| ENSGALG00010030072 | 0.86924154  | 0.232717136 |
| ENSGALG00010030073 | 0.845446017 | 0.203979876 |
| ENSGALG00010030074 | 0.412432723 | 0.157005434 |
| ENSGALG00010030075 | 0.032251128 | 0.066414782 |
| ENSGALG00010030076 | 0.515522834 | 0.144283912 |
| ENSGALG00010030080 | 0.434561311 | 0.038781454 |
| ENSGALG00010030081 | 0.863818482 | 0.276755676 |
| ENSGALG00010030082 | 0.910008608 | 0.318614762 |
| ENSGALG00010030084 | 0.189609775 | 0.037416632 |
| ENSGALG00010030085 | 0.089985046 | 0.429628186 |
| ENSGALG00010030087 | 0.192559451 | 0.243801159 |
| ENSGALG00010030088 | 0.38480368  | 0.180523942 |
| ENSGALG00010030089 | 0.16810692  | 0.168037377 |
| ENSGALG00010030091 | 0.396365709 | 0.157137627 |
| ENSGALG00010030100 | 0.506004162 | 0.19477771  |
| ENSGALG00010030101 | 0.95633373  | 0.368615735 |
| ENSGALG00010030102 | 0.982482726 | 0.351681263 |
| ENSGALG00010030103 | 0.093680825 | 0.121060027 |
| ENSGALG00010030104 | 0.991791047 | 0.311065543 |
| ENSGALG00010030105 | 0.443955729 | 0.160904907 |
| ENSGALG00010030106 | 0.911658811 | 0.272358657 |
| ENSGALG00010030107 | 0.79801444  | 0.269339316 |
| ENSGALG00010030108 | 0.962719101 | 0.296716842 |
| ENSGALG00010030109 | 0.514288074 | 0.029961593 |
