# Supplementary material for: Weighted gene co-expression network analysis identifies important modules and hub genes involved in the regulation of breast muscle yield in broilers
Source: PubMed Central journal article supplement (PMC11366510; doi:10.5713/ab.23.0548), 2024-04-25
Supplement: ab-23-0548-Supplementary-Table-8.pdf [file ab-23-0548-Supplementary-Table-8.pdf]

**Table S8. Hub genes identified in the skyblue3 module.**

| Gene ID            | gene name          |
|--------------------|--------------------|
| ENSGALG00010028957 | ENSGALG00010028957 |
| ENSGALG00010005055 | ENSGALG00010005055 |
| ENSGALG00010007379 | ENSGALG00010007379 |
| ENSGALG00010019489 | ENSGALG00010019489 |
| ENSGALG00010028616 | ENSGALG00010028616 |
| ENSGALG00010028948 | ENSGALG00010028948 |
| ENSGALG00010011669 | ENSGALG00010011669 |
| ENSGALG00010028023 | ENSGALG00010028023 |
| ENSGALG00010016628 | ENSGALG00010016628 |
| ENSGALG00010021132 | CALHM3             |
| ENSGALG00010010930 | FAM163A            |
| ENSGALG00010007044 | ENSGALG00010007044 |
| ENSGALG00010020904 | ENSGALG00010020904 |
| ENSGALG00010011938 | ENSGALG00010011938 |
| ENSGALG00010020400 | ENSGALG00010020400 |
| ENSGALG00010028945 | ENSGALG00010028945 |
| ENSGALG00010015988 | ENSGALG00010015988 |
| ENSGALG00010028588 | ABHD8              |
| ENSGALG00010015294 | ENSGALG00010015294 |
| ENSGALG00010023295 | ENSGALG00010023295 |
| ENSGALG00010015293 | ENSGALG00010015293 |
| ENSGALG00010020427 | ENSGALG00010020427 |
| ENSGALG00010020897 | VTG3               |
| ENSGALG00010026116 | DLX3               |
| ENSGALG00010022763 | ENSGALG00010022763 |
| ENSGALG00010025036 | ENSGALG00010025036 |
| ENSGALG00010023037 | ENSGALG00010023037 |
| ENSGALG00010023325 | ENSGALG00010023325 |
| ENSGALG00010002375 | NPY                |
| ENSGALG00010026587 | ENSGALG00010026587 |
| ENSGALG00010009783 | ENSGALG00010009783 |
| ENSGALG00010022373 | AK5                |
| ENSGALG00010018155 | ENSGALG00010018155 |
| ENSGALG00010019415 | ENSGALG00010019415 |
| ENSGALG00010016621 | GRXCR2             |
| ENSGALG00010019992 | CHAC2              |
| ENSGALG00010029523 | FSCN2              |
| ENSGALG00010018083 | PAX1               |
| ENSGALG00010024214 | CRABP1             |
| ENSGALG00010023326 | ENSGALG00010023326 |
| ENSGALG00010016051 | ENSGALG00010016051 |
| ENSGALG00010001372 | ENSGALG00010001372 |
| ENSGALG00010005206 | gga-mir-6601       |
| ENSGALG00010016627 | SH3RF2             |
| ENSGALG00010022611 | gga-mir-191        |
| ENSGALG00010017352 | GPCPD1             |
| ENSGALG00010012459 | ENSGALG00010012459 |
| ENSGALG00010015506 | ENSGALG00010015506 |
| ENSGALG00010002531 | ENSGALG00010002531 |
| ENSGALG00010014307 | ENSGALG00010014307 |
| ENSGALG00010008479 | ENSGALG00010008479 |
| ENSGALG00010019144 | IFT122             |
| ENSGALG00010020430 | ENSGALG00010020430 |

|                    |                    |
|--------------------|--------------------|
| ENSGALG00010027385 | CNTN2              |
| ENSGALG00010023339 | ENSGALG00010023339 |
| ENSGALG00010024844 | TM4SF19            |
| ENSGALG00010029071 | ENSGALG00010029071 |
| ENSGALG00010028152 | ENSGALG00010028152 |
| ENSGALG00010024124 | DIDO1              |
| ENSGALG00010025238 | IGSF9B             |
| ENSGALG00010019299 | ENSGALG00010019299 |
| ENSGALG00010013111 | RFESD              |
| ENSGALG00010009819 | ENSGALG00010009819 |
| ENSGALG00010000811 | ENSGALG00010000811 |
| ENSGALG00010004285 | SLC18B1            |
| ENSGALG00010021986 | ENSGALG00010021986 |
| ENSGALG00010007274 | ENSGALG00010007274 |
| ENSGALG00010019838 | ALX4               |
| ENSGALG00010009471 | ENSGALG00010009471 |
| ENSGALG00010024380 | PNMT               |
| ENSGALG00010023333 | ENDOU              |
| ENSGALG00010002535 | ENSGALG00010002535 |
| ENSGALG00010003684 | ENSGALG00010003684 |
| ENSGALG00010007520 | ENSGALG00010007520 |
| ENSGALG00010008944 | ENSGALG00010008944 |
| ENSGALG00010011109 | ENSGALG00010011109 |
| ENSGALG00010011259 | ENSGALG00010011259 |
| ENSGALG00010014279 | ENSGALG00010014279 |
| ENSGALG00010015106 | ENSGALG00010015106 |
| ENSGALG00010016539 | ENSGALG00010016539 |
| ENSGALG00010019133 | ENSGALG00010019133 |
| ENSGALG00010019512 | ENSGALG00010019512 |
| ENSGALG00010022848 | SGIP1              |
| ENSGALG00010024015 | ENSGALG00010024015 |
| ENSGALG00010024087 | ENSGALG00010024087 |
| ENSGALG00010026363 | FAM187A            |
| ENSGALG00010026490 | ENSGALG00010026490 |
| ENSGALG00010027868 | CACNA2D3           |
| ENSGALG00010028940 | ENSGALG00010028940 |
| ENSGALG00010018176 | ENSGALG00010018176 |
| ENSGALG00010002640 | ENSGALG00010002640 |
| ENSGALG00010003163 | ENSGALG00010003163 |
| ENSGALG00010003266 | ENSGALG00010003266 |
| ENSGALG00010004320 | ENSGALG00010004320 |
| ENSGALG00010004813 | ENSGALG00010004813 |
| ENSGALG00010005066 | ENSGALG00010005066 |
| ENSGALG00010007804 | ENSGALG00010007804 |
| ENSGALG00010010040 | ENSGALG00010010040 |
| ENSGALG00010010176 | ENSGALG00010010176 |
| ENSGALG00010010227 | OLIG2              |
| ENSGALG00010010517 | STMN4              |
| ENSGALG00010011444 | TMEM252            |
| ENSGALG00010014123 | ENSGALG00010014123 |
| ENSGALG00010014815 | ENSGALG00010014815 |
| ENSGALG00010015178 | ENSGALG00010015178 |
| ENSGALG00010015183 | SLC5A7             |
| ENSGALG00010016327 | IL4                |
| ENSGALG00010018679 | ENSGALG00010018679 |
| ENSGALG00010018683 | ENSGALG00010018683 |

|                    |                    |
|--------------------|--------------------|
| ENSGALG00010020482 | Metazoa SRP        |
| ENSGALG00010020488 | gga-mir-1676       |
| ENSGALG00010021128 | CALHM1             |
| ENSGALG00010021796 | VENTX              |
| ENSGALG00010023754 | ENSGALG00010023754 |
| ENSGALG00010025110 | ENSGALG00010025110 |
| ENSGALG00010026577 | ENSGALG00010026577 |
| ENSGALG00010027851 | gga-mir-6654       |
| ENSGALG00010029871 | ENSGALG00010029871 |
| ENSGALG00010019340 | ENSGALG00010019340 |
| ENSGALG00010010369 | ENSGALG00010010369 |
| ENSGALG00010001827 | PDZRN4             |
| ENSGALG00010009567 | NSD1               |
| ENSGALG00010022175 | ENSGALG00010022175 |
| ENSGALG00010026780 | MYSM1              |
| ENSGALG00010016284 | ENSGALG00010016284 |
| ENSGALG00010026117 | LZTR1              |
| ENSGALG00010004386 | CFAP44             |
| ENSGALG00010022271 | SLC18A2            |
| ENSGALG00010028654 | ENSGALG00010028654 |
| ENSGALG00010002569 | GTPBP6             |
| ENSGALG00010003918 | HTR1E              |
| ENSGALG00010013568 | ENSGALG00010013568 |
| ENSGALG00010024960 | ARFRP1             |
| ENSGALG00010020647 | ENSGALG00010020647 |
| ENSGALG00010005682 | ENSGALG00010005682 |
| ENSGALG00010012086 | CIBAR1             |
| ENSGALG00010012128 | ENSGALG00010012128 |
| ENSGALG00010013093 | GPATCH3            |
| ENSGALG00010006736 | ENSGALG00010006736 |
| ENSGALG00010008346 | NR4A3              |
| ENSGALG00010022851 | ENSGALG00010022851 |
| ENSGALG00010025012 | CRH2               |
| ENSGALG00010023174 | KCNQ2              |
| ENSGALG00010018929 | ENSGALG00010018929 |
| ENSGALG00010025447 | ENSGALG00010025447 |
| ENSGALG00010010667 | ENSGALG00010010667 |
| ENSGALG00010013952 | ENSGALG00010013952 |
| ENSGALG00010023246 | SP5                |
| ENSGALG00010024154 | VPS29L             |
| ENSGALG00010024492 | NTF3               |
