# Supplementary material for: Weighted gene co-expression network analysis identifies important modules and hub genes involved in the regulation of breast muscle yield in broilers
Source: PubMed Central journal article supplement (PMC11366510; doi:10.5713/ab.23.0548), 2024-04-25
Supplement: ab-23-0548-Supplementary-Table-9.pdf [file ab-23-0548-Supplementary-Table-9.pdf]

**Table S9. Functional enrichment analysis of the hub genes in the skyblue3 module.**

| Category | Term description                             | Term ID    | Adjusted p value | Genes                                 |
|----------|----------------------------------------------|------------|------------------|---------------------------------------|
| GO:MF    | monoamine:proton antiporter activity         | GO:0015311 | 0.02079708       | ENSGALG00010004285,ENSGALG00010022271 |
| GO:MF    | monoamine transmembrane transporter activity | GO:0008504 | 0.0480393        | ENSGALG00010004285,ENSGALG00010022271 |
