# Supplementary material for: Weighted gene co-expression network analysis identifies important modules and hub genes involved in the regulation of breast muscle yield in broilers
Source: PubMed Central journal article supplement (PMC11366510; doi:10.5713/ab.23.0548), 2024-04-25
Supplement: ab-23-0548-Supplementary-Table-10.pdf [file ab-23-0548-Supplementary-Table-10.pdf]

**Table S10. The hub genes identified in the turquoise module.**

| Gene ID            | gene name          |
|--------------------|--------------------|
| ENSGALG00010028598 | TMOD4              |
| ENSGALG00010029655 | PHKG1              |
| ENSGALG00010029215 | ENSGALG00010029215 |
| ENSGALG00010024570 | TPM1               |
| ENSGALG00010024181 | FOXD3              |
| ENSGALG00010019451 | CAV3               |
| ENSGALG00010016292 | PHKA1              |
| ENSGALG00010000153 | NF2                |
| ENSGALG00010002079 | ARX                |
| ENSGALG00010012253 | MYF6               |
| ENSGALG00010018340 | DNPEP              |
| ENSGALG00010029786 | ENSGALG00010029786 |
| ENSGALG00010017826 | PABPC4             |
| ENSGALG00010019045 | LBX1               |
| ENSGALG00010023392 | TPI1               |
| ENSGALG00010013012 | TMEM182            |
| ENSGALG00010023957 | YBX3               |
| ENSGALG00010022774 | A1CF               |
| ENSGALG00010021110 | PKLR               |
| ENSGALG00010013846 | YIPF7              |
| ENSGALG00010009385 | GPI                |
| ENSGALG00010006069 | TTR                |
| ENSGALG00010001844 | HOXA10             |
| ENSGALG00010029785 | ENSGALG00010029785 |
| ENSGALG00010004358 | GC                 |
| ENSGALG00010017501 | SPIA5              |
| ENSGALG00010006653 | CFL2               |
| ENSGALG00010003750 | CPB2               |
| ENSGALG00010023605 | INSYN1             |
| ENSGALG00010000081 | ALDOA              |
| ENSGALG00010013965 | SLC2A2             |
| ENSGALG00010021670 | BLCAP              |
| ENSGALG00010009379 | RYR1               |
| ENSGALG00010019065 | CAND2              |
| ENSGALG00010023099 | DNAJC22            |
| ENSGALG00010007226 | PLG                |
| ENSGALG00010026635 | C8A                |
| ENSGALG00010017481 | SPIA1              |
| ENSGALG00010005199 | ENSGALG00010005199 |
| ENSGALG00010029213 | APOH               |
| ENSGALG00010016781 | CDIP1              |
| ENSGALG00010004990 | ENSGALG00010004990 |
| ENSGALG00010018306 | DES                |
| ENSGALG00010022038 | GAPDH              |
| ENSGALG00010024051 | KRT8               |
| ENSGALG00010006570 | SULT6B1L           |
| ENSGALG00010018322 | NT5C1A             |
| ENSGALG00010027351 | TMEM38A            |
| ENSGALG00010029336 | SYNGR2             |
| ENSGALG00010027409 | ENSGALG00010027409 |
| ENSGALG00010021228 | ESRP2              |
| ENSGALG00010001427 | ASB11              |
| ENSGALG00010011715 | SLCO1B3            |

|                    |                    |
|--------------------|--------------------|
| ENSGALG00010014778 | TMPRSS6            |
| ENSGALG00010016699 | SYNPO              |
| ENSGALG00010022972 | A2M                |
| ENSGALG00010004888 | FOXA1              |
| ENSGALG00010017512 | SPIA9              |
| ENSGALG00010027714 | SYPL2              |
| ENSGALG00010026700 | C8B                |
| ENSGALG00010024440 | PKNOX2             |
| ENSGALG00010008084 | CYP2AC1            |
| ENSGALG00010007977 | APOB               |
| ENSGALG00010014972 | FGA                |
| ENSGALG00010002953 | WDFY2              |
| ENSGALG00010008664 | TM4SF1a            |
| ENSGALG00010018732 | FYTTD1L            |
| ENSGALG00010028849 | CCDC180            |
| ENSGALG00010017466 | SPIA4              |
| ENSGALG00010017460 | SERPINA10          |
| ENSGALG00010001351 | CAPN1              |
| ENSGALG00010004338 | ENSGALG00010004338 |
| ENSGALG00010003206 | ENSGALG00010003206 |
| ENSGALG00010008168 | CAVIN4             |
| ENSGALG00010018783 | ENSGALG00010018783 |
| ENSGALG00010013767 | PGK2               |
| ENSGALG00010018076 | FOXA2              |
| ENSGALG00010000476 | ENSGALG00010000476 |
| ENSGALG00010014696 | SPINK5             |
| ENSGALG00010002582 | C10orf90           |
| ENSGALG00010016263 | HGFAC              |
| ENSGALG00010013994 | CHRM2              |
| ENSGALG00010027528 | APOA2              |
| ENSGALG00010005255 | BZW2               |
| ENSGALG00010020714 | PGAM1              |
| ENSGALG00010020327 | MTTPL              |
| ENSGALG00010005926 | NUDT5              |
| ENSGALG00010024018 | KRT18              |
| ENSGALG00010012264 | MYF5               |
| ENSGALG00010007957 | CDH15              |
| ENSGALG00010025499 | STAC3              |
| ENSGALG00010017656 | FSD2               |
| ENSGALG00010001514 | MET                |
| ENSGALG00010025996 | CUL3               |
| ENSGALG00010028082 | AK1                |
| ENSGALG00010005269 | KIN                |
| ENSGALG00010016400 | PRPS1L1            |
| ENSGALG00010009676 | ACO1               |
| ENSGALG00010019621 | ENSGALG00010019621 |
| ENSGALG00010016229 | ENSGALG00010016229 |
| ENSGALG00010015188 | SULT1C3            |
| ENSGALG00010020302 | HAAO               |
| ENSGALG00010000571 | ASPDH              |
| ENSGALG00010004921 | RRAGD              |
| ENSGALG00010012171 | CDH17              |
| ENSGALG00010017562 | SLC30A10           |
| ENSGALG00010021871 | ENSGALG00010021871 |
| ENSGALG00010004973 | SLN                |
| ENSGALG00010022987 | F2                 |

|                    |                    |
|--------------------|--------------------|
| ENSGALG00010001971 | MLIP               |
| ENSGALG00010004995 | PIT54              |
| ENSGALG00010003811 | PGLYRP2            |
| ENSGALG00010006487 | ENSGALG00010006487 |
| ENSGALG00010013428 | BPGM               |
| ENSGALG00010014540 | FTCD               |
| ENSGALG00010005556 | IYD                |
| ENSGALG00010011455 | AvBD8              |
| ENSGALG00010010115 | NEB                |
| ENSGALG00010013029 | MYLK2              |
| ENSGALG00010028053 | ORM1               |
| ENSGALG00010024650 | PRKAG1             |
| ENSGALG00010020734 | SIGIRR             |
| ENSGALG00010021381 | DNAJB2             |
| ENSGALG00010006279 | HACD1              |
| ENSGALG00010013451 | PRKAB2             |
| ENSGALG00010023762 | BBS5               |
| ENSGALG00010016916 | ACYP2              |
| ENSGALG00010022236 | SHF                |
| ENSGALG00010016177 | HRG                |
| ENSGALG00010020730 | RRP12              |
| ENSGALG00010027059 | ASB14              |
| ENSGALG00010015075 | MUL1L              |
| ENSGALG00010022568 | SCRN3              |
| ENSGALG00010012730 | CAP2               |
| ENSGALG00010005264 | ITIH2              |
| ENSGALG00010024546 | KY                 |
| ENSGALG00010017724 | FLII               |
| ENSGALG00010019764 | ENSGALG00010019764 |
| ENSGALG00010020070 | ARL6IP5            |
| ENSGALG00010025504 | AMPD1              |
| ENSGALG00010020142 | SLC35E2B           |
| ENSGALG00010017515 | SPIA3              |
| ENSGALG00010028479 | CASQ2              |
| ENSGALG00010000565 | ENSGALG00010000565 |
| ENSGALG00010027153 | ACTR3B             |
| ENSGALG00010021619 | FHOD1              |
| ENSGALG00010015583 | PRDM4              |
| ENSGALG00010027225 | CREB3L3            |
| ENSGALG00010013429 | PDE4DIP            |
| ENSGALG00010029628 | UNC45B             |
