# Supplementary material for: Weighted gene co-expression network analysis identifies important modules and hub genes involved in the regulation of breast muscle yield in broilers
Source: PubMed Central journal article supplement (PMC11366510; doi:10.5713/ab.23.0548), 2024-04-25
Supplement: ab-23-0548-Supplementary-Table-11.pdf [file ab-23-0548-Supplementary-Table-11.pdf]

**Table S11. Functional enrichment analysis of the top 150 hub genes in the turquoise module.**

| Category | Term description                             | Term ID    | Adjusted p value | Genes                                                                                                                                                                                         |
|----------|----------------------------------------------|------------|------------------|-----------------------------------------------------------------------------------------------------------------------------------------------------------------------------------------------|
| GO:MF    | endopeptidase inhibitor activity             | GO:0004866 | 9.55E-06         | ENSGALG00010017501,ENSGALG00010017481,ENSGALG00010022038,ENSGALG00010022972,ENSGALG00010017512,ENSGALG00010017466,ENSGALG00010017460,ENSGALG00010016177,ENSGALG00010005264,ENSGALG00010017515 |
| GO:MF    | peptidase inhibitor activity                 | GO:0030414 | 9.55E-06         | ENSGALG00010017501,ENSGALG00010017481,ENSGALG00010022038,ENSGALG00010022972,ENSGALG00010017512,ENSGALG00010017466,ENSGALG00010017460,ENSGALG00010016177,ENSGALG00010005264,ENSGALG00010017515 |
| GO:MF    | endopeptidase regulator activity             | GO:0061135 | 9.55E-06         | ENSGALG00010017501,ENSGALG00010017481,ENSGALG00010022038,ENSGALG00010022972,ENSGALG00010017512,ENSGALG00010017466,ENSGALG00010017460,ENSGALG00010016177,ENSGALG00010005264,ENSGALG00010017515 |
| GO:MF    | peptidase regulator activity                 | GO:0061134 | 3.49E-05         | ENSGALG00010017501,ENSGALG00010017481,ENSGALG00010022038,ENSGALG00010022972,ENSGALG00010017512,ENSGALG00010017466,ENSGALG00010017460,ENSGALG00010016177,ENSGALG00010005264,ENSGALG00010017515 |
| GO:MF    | serine-type endopeptidase inhibitor activity | GO:0004867 | 4.67E-05         | ENSGALG00010017501,ENSGALG00010017481,ENSGALG00010017512,ENSGALG00010017466,ENSGALG00010017460,ENSGALG00010005264,ENSGALG00010017515                                                          |
| GO:MF    | enzyme inhibitor activity                    | GO:0004857 | 0.002536         | ENSGALG00010017501,ENSGALG00010017481,ENSGALG00010022038,ENSGALG00010022972,ENSGALG00010017512,ENSGALG00010017466,ENSGALG00010017460,ENSGALG00010016177,ENSGALG00010005264,ENSGALG00010017515 |

|       |                                                                             |            |          |                                                                                                                                                                                               |
|-------|-----------------------------------------------------------------------------|------------|----------|-----------------------------------------------------------------------------------------------------------------------------------------------------------------------------------------------|
| GO:MF | phosphoglycerate mutase activity                                            | GO:0004619 | 0.004217 | ENSGALG00010020714,ENSGALG00010013428                                                                                                                                                         |
| GO:MF | actin binding                                                               | GO:0003779 | 0.007441 | ENSGALG00010028598,ENSGALG00010024570,ENSGALG00010000153,ENSGALG00010004358,ENSGALG00010006653,ENSGALG00010016699,ENSGALG00010024440,ENSGALG00010010115,ENSGALG00010012730,ENSGALG00010017724 |
| GO:MF | intramolecular oxidoreductase activity, interconverting aldoses and ketoses | GO:0016861 | 0.017502 | ENSGALG00010023392,ENSGALG00010009385                                                                                                                                                         |
| GO:MF | fructose-bisphosphate aldolase activity                                     | GO:0004332 | 0.017502 | ENSGALG00010000081,ENSGALG00010000476                                                                                                                                                         |
| GO:BP | glycolytic process                                                          | GO:0006096 | 3.60E-06 | ENSGALG00010023392,ENSGALG00010021110,ENSGALG00010009385,ENSGALG00010000081,ENSGALG00010022038,ENSGALG00010013767,ENSGALG00010000476,ENSGALG00010020714,ENSGALG00010013428                    |
| GO:BP | carbohydrate catabolic process                                              | GO:0016052 | 5.59E-06 | ENSGALG00010023392,ENSGALG00010021110,ENSGALG00010009385,ENSGALG00010000081,ENSGALG00010022038,ENSGALG00010013767,ENSGALG00010000476,ENSGALG00010020714,ENSGALG00010005926,ENSGALG00010013428 |
| GO:BP | pyruvate metabolic process                                                  | GO:0006090 | 1.41E-05 | ENSGALG00010023392,ENSGALG00010021110,ENSGALG00010009385,ENSGALG00010000081,ENSGALG00010022038,ENSGALG00010013767,ENSGALG00010000476,ENSGALG00010020714,ENSGALG00010013428                    |

|       |                                   |            |          |                                                                                                                                                                                                                                                                                                                                                                                                                                                                                                               |
|-------|-----------------------------------|------------|----------|---------------------------------------------------------------------------------------------------------------------------------------------------------------------------------------------------------------------------------------------------------------------------------------------------------------------------------------------------------------------------------------------------------------------------------------------------------------------------------------------------------------|
| GO:BP | muscle cell development           | GO:0055001 | 1.85E-05 | ENSGALG00010024570,ENSGALG00010019451,ENSGALG00010012253,ENSGALG00010013012,ENSGALG00010006653,ENSGALG00010027714,ENSGALG00010012264,ENSGALG00010025499,ENSGALG00010023762,ENSGALG00010028479                                                                                                                                                                                                                                                                                                                 |
| GO:BP | small molecule metabolic process  | GO:0044281 | 0.000705 | ENSGALG00010023392,ENSGALG00010021110,ENSGALG00010009385,ENSGALG00010006069,ENSGALG00010004358,ENSGALG00010000081,ENSGALG00010022038,ENSGALG00010018322,ENSGALG00010008084,ENSGALG00010007977,ENSGALG00010013767,ENSGALG00010000476,ENSGALG00010020714,ENSGALG00010005926,ENSGALG00010028082,ENSGALG00010016400,ENSGALG00010009676,ENSGALG00010015188,ENSGALG00010020302,ENSGALG00010000571,ENSGALG00010013428,ENSGALG00010005556,ENSGALG00010024650,ENSGALG00010006279,ENSGALG00010013451,ENSGALG00010025504 |
| GO:BP | actomyosin structure organization | GO:0031032 | 0.000705 | ENSGALG00010024570,ENSGALG00010019451,ENSGALG00010000153,ENSGALG00010006653,ENSGALG00010001514,ENSGALG00010025996,ENSGALG00010023762,ENSGALG00010028479,ENSGALG00010021619                                                                                                                                                                                                                                                                                                                                    |
| GO:BP | sarcomere organization            | GO:0045214 | 0.001206 | ENSGALG00010024570,ENSGALG00010019451,ENSGALG00010006653,ENSGALG00010023762,ENSGALG00010028479                                                                                                                                                                                                                                                                                                                                                                                                                |
| GO:BP | organic acid metabolic process    | GO:0006082 | 0.00174  | ENSGALG00010023392,ENSGALG00010021110,ENSGALG00010009385,ENSGALG00010000081,ENSGALG00010022038,ENSGALG00010008084,ENSGALG00010013767,ENSGALG00010000476,ENSGALG00010020714,ENSGALG00010009676,ENSGALG00010015188,ENSGALG00010020302,ENSGALG00010013428,ENSGALG00010005556,ENSGALG00010024650,ENSGALG00010006279,ENSGALG00010013451                                                                                                                                                                            |

|       |                                      |            |          |                                                                                                                                                                                               |
|-------|--------------------------------------|------------|----------|-----------------------------------------------------------------------------------------------------------------------------------------------------------------------------------------------|
| GO:BP | blood coagulation                    | GO:0007596 | 0.001814 | ENSGALG00010003750,ENSGALG00010007226,ENSGALG00010029213,ENSGALG00010014972,ENSGALG00010017460,ENSGALG00010018076,ENSGALG00010016263,ENSGALG00010022987                                       |
| GO:BP | myotube cell development             | GO:0014904 | 0.001814 | ENSGALG00010012253,ENSGALG00010013012,ENSGALG00010012264,ENSGALG00010025499,ENSGALG00010023762                                                                                                |
| GO:BP | hemostasis                           | GO:0007599 | 0.001823 | ENSGALG00010003750,ENSGALG00010007226,ENSGALG00010029213,ENSGALG00010014972,ENSGALG00010017460,ENSGALG00010018076,ENSGALG00010016263,ENSGALG00010022987                                       |
| GO:BP | coagulation                          | GO:0050817 | 0.001823 | ENSGALG00010003750,ENSGALG00010007226,ENSGALG00010029213,ENSGALG00010014972,ENSGALG00010017460,ENSGALG00010018076,ENSGALG00010016263,ENSGALG00010022987                                       |
| GO:BP | striated muscle cell differentiation | GO:0051146 | 0.001852 | ENSGALG00010024570,ENSGALG00010019451,ENSGALG00010012253,ENSGALG00010013012,ENSGALG00010006653,ENSGALG00010012264,ENSGALG00010025499,ENSGALG00010023762,ENSGALG00010028479                    |
| GO:BP | myofibril assembly                   | GO:0030239 | 0.00327  | ENSGALG00010024570,ENSGALG00010019451,ENSGALG00010006653,ENSGALG00010023762,ENSGALG00010028479                                                                                                |
| GO:BP | muscle cell differentiation          | GO:0042692 | 0.003292 | ENSGALG00010024570,ENSGALG00010019451,ENSGALG00010012253,ENSGALG00010013012,ENSGALG00010006653,ENSGALG00010027714,ENSGALG00010012264,ENSGALG00010025499,ENSGALG00010023762,ENSGALG00010028479 |

|       |                                       |            |          |                                                                                                                                                                                                                                                                                                                 |
|-------|---------------------------------------|------------|----------|-----------------------------------------------------------------------------------------------------------------------------------------------------------------------------------------------------------------------------------------------------------------------------------------------------------------|
| GO:BP | monocarboxylic acid metabolic process | GO:0032787 | 0.003292 | ENSGALG00010023392,ENSGALG00010021110,ENSGALG00010009385,ENSGALG00010000081,ENSGALG00010022038,ENSGALG00010013767,ENSGALG00010000476,ENSGALG00010020714,ENSGALG00010013428,ENSGALG00010024650,ENSGALG00010006279,ENSGALG00010013451                                                                             |
| GO:BP | oxoacid metabolic process             | GO:0043436 | 0.003292 | ENSGALG00010023392,ENSGALG00010021110,ENSGALG00010009385,ENSGALG00010000081,ENSGALG00010022038,ENSGALG00010013767,ENSGALG00010000476,ENSGALG00010020714,ENSGALG00010009676,ENSGALG00010015188,ENSGALG00010020302,ENSGALG00010013428,ENSGALG00010005556,ENSGALG00010024650,ENSGALG00010006279,ENSGALG00010013451 |
| GO:BP | muscle structure development          | GO:0061061 | 0.003292 | ENSGALG00010024570,ENSGALG00010019451,ENSGALG00010012253,ENSGALG00010013012,ENSGALG00010006653,ENSGALG00010027714,ENSGALG00010012264,ENSGALG00010025499,ENSGALG00010013029,ENSGALG00010023762,ENSGALG00010024546,ENSGALG00010028479,ENSGALG00010029628                                                          |
| GO:BP | striated muscle cell development      | GO:0055002 | 0.003292 | ENSGALG00010024570,ENSGALG00010019451,ENSGALG00010006653,ENSGALG00010023762,ENSGALG00010028479                                                                                                                                                                                                                  |
| GO:BP | myotube differentiation               | GO:0014902 | 0.004148 | ENSGALG00010019451,ENSGALG00010012253,ENSGALG00010013012,ENSGALG00010012264,ENSGALG00010025499,ENSGALG00010023762                                                                                                                                                                                               |
| GO:BP | fibrinolysis                          | GO:0042730 | 0.005309 | ENSGALG00010003750,ENSGALG00010007226,ENSGALG00010029213                                                                                                                                                                                                                                                        |

|       |                                   |            |          |                                                                                                                                                                                                                                                                                              |
|-------|-----------------------------------|------------|----------|----------------------------------------------------------------------------------------------------------------------------------------------------------------------------------------------------------------------------------------------------------------------------------------------|
| GO:BP | muscle organ development          | GO:0007517 | 0.005451 | ENSGALG00010024570,ENSGALG00010012253,ENSGALG00010006653,ENSGALG00010012264,ENSGALG00010025499,ENSGALG00010013029,ENSGALG00010023762,ENSGALG00010024546,ENSGALG00010029628                                                                                                                   |
| GO:BP | carbohydrate metabolic process    | GO:0005975 | 0.007004 | ENSGALG00010029655,ENSGALG00010016292,ENSGALG00010023392,ENSGALG00010021110,ENSGALG00010009385,ENSGALG00010000081,ENSGALG00010022038,ENSGALG00010013767,ENSGALG00010000476,ENSGALG00010020714,ENSGALG00010005926,ENSGALG00010013428                                                          |
| GO:BP | carboxylic acid metabolic process | GO:0019752 | 0.007117 | ENSGALG00010023392,ENSGALG00010021110,ENSGALG00010009385,ENSGALG00010000081,ENSGALG00010022038,ENSGALG00010013767,ENSGALG00010000476,ENSGALG00010020714,ENSGALG00010009676,ENSGALG00010020302,ENSGALG00010013428,ENSGALG00010005556,ENSGALG00010024650,ENSGALG00010006279,ENSGALG00010013451 |
| GO:BP | skeletal muscle fiber development | GO:0048741 | 0.007117 | ENSGALG00010012253,ENSGALG00010012264,ENSGALG00010025499,ENSGALG00010023762                                                                                                                                                                                                                  |
| GO:BP | actin filament-based process      | GO:0030029 | 0.009573 | ENSGALG00010028598,ENSGALG00010024570,ENSGALG00010019451,ENSGALG00010000153,ENSGALG00010006653,ENSGALG00010016699,ENSGALG00010001514,ENSGALG00010025996,ENSGALG00010013029,ENSGALG00010023762,ENSGALG00010012730,ENSGALG00010017724,ENSGALG00010028479,ENSGALG00010021619                    |

|       |                                                       |            |          |                                                                                                                                                                                                                                                        |
|-------|-------------------------------------------------------|------------|----------|--------------------------------------------------------------------------------------------------------------------------------------------------------------------------------------------------------------------------------------------------------|
| GO:BP | actin cytoskeleton organization                       | GO:0030036 | 0.010374 | ENSGALG00010028598,ENSGALG00010024570,ENSGALG00010019451,ENSGALG00010000153,ENSGALG00010006653,ENSGALG00010016699,ENSGALG00010001514,ENSGALG00010025996,ENSGALG00010023762,ENSGALG00010012730,ENSGALG00010017724,ENSGALG00010028479,ENSGALG00010021619 |
| GO:BP | wound healing                                         | GO:0042060 | 0.010374 | ENSGALG00010019451,ENSGALG00010003750,ENSGALG00010007226,ENSGALG00010029213,ENSGALG00010014972,ENSGALG00010017460,ENSGALG00010018076,ENSGALG00010016263,ENSGALG00010022987                                                                             |
| GO:BP | regulation of body fluid levels                       | GO:0050878 | 0.012533 | ENSGALG00010003750,ENSGALG00010007226,ENSGALG00010029213,ENSGALG00010014972,ENSGALG00010017460,ENSGALG00010018076,ENSGALG00010016263,ENSGALG00010022987                                                                                                |
| GO:BP | striated muscle contraction                           | GO:0006941 | 0.013053 | ENSGALG00010024570,ENSGALG00010019451,ENSGALG00010027351,ENSGALG00010025499,ENSGALG00010013029,ENSGALG00010028479                                                                                                                                      |
| GO:BP | regulation of myoblast differentiation                | GO:0045661 | 0.025211 | ENSGALG00010012253,ENSGALG00010013012,ENSGALG00010012264,ENSGALG00010023762                                                                                                                                                                            |
| GO:BP | cellular component assembly involved in morphogenesis | GO:0010927 | 0.025211 | ENSGALG00010024570,ENSGALG00010019451,ENSGALG00010006653,ENSGALG00010023762,ENSGALG00010028479                                                                                                                                                         |

|       |                                                |            |          |                                                                                                                                      |
|-------|------------------------------------------------|------------|----------|--------------------------------------------------------------------------------------------------------------------------------------|
| GO:BP | regulation of blood coagulation                | GO:0030193 | 0.025211 | ENSGALG00010003750,ENSGALG00010007226,ENSGALG00010029213,ENSGALG00010018076                                                          |
| GO:BP | skeletal muscle contraction                    | GO:0003009 | 0.025211 | ENSGALG00010019451,ENSGALG00010025499,ENSGALG00010028479                                                                             |
| GO:BP | regulation of hemostasis                       | GO:1900046 | 0.026673 | ENSGALG00010003750,ENSGALG00010007226,ENSGALG00010029213,ENSGALG00010018076                                                          |
| GO:BP | skeletal muscle tissue development             | GO:0007519 | 0.029153 | ENSGALG00010012253,ENSGALG00010006653,ENSGALG00010012264,ENSGALG00010025499,ENSGALG00010013029,ENSGALG00010023762                    |
| GO:BP | regulation of coagulation                      | GO:0050818 | 0.030334 | ENSGALG00010003750,ENSGALG00010007226,ENSGALG00010029213,ENSGALG00010018076                                                          |
| GO:BP | ribonucleoside monophosphate metabolic process | GO:0009161 | 0.03227  | ENSGALG00010018322,ENSGALG00010028082,ENSGALG00010016400,ENSGALG00010025504                                                          |
| GO:BP | muscle contraction                             | GO:0006936 | 0.032596 | ENSGALG00010024570,ENSGALG00010019451,ENSGALG00010027351,ENSGALG00010013994,ENSGALG00010025499,ENSGALG00010013029,ENSGALG00010028479 |



|       |                                                        |            |          |                                                                                                                                                                                                                                     |
|-------|--------------------------------------------------------|------------|----------|-------------------------------------------------------------------------------------------------------------------------------------------------------------------------------------------------------------------------------------|
| GO:BP | monosaccharide catabolic process                       | GO:0046365 | 0.032795 | ENSGALG00010023392,ENSGALG00010021110,ENSGALG00010005926                                                                                                                                                                            |
| GO:BP | supramolecular fiber organization                      | GO:0097435 | 0.032795 | ENSGALG00010028598,ENSGALG00010024570,ENSGALG00010019451,ENSGALG00010000153,ENSGALG00010006653,ENSGALG00010018306,ENSGALG00010016699,ENSGALG00010001514,ENSGALG00010025996,ENSGALG00010023762,ENSGALG00010028479,ENSGALG00010021619 |
| GO:BP | skeletal muscle organ development                      | GO:0060538 | 0.032795 | ENSGALG00010012253,ENSGALG00010006653,ENSGALG00010012264,ENSGALG00010025499,ENSGALG00010013029,ENSGALG00010023762                                                                                                                   |
| GO:BP | nucleobase-containing small molecule metabolic process | GO:0055086 | 0.032795 | ENSGALG00010006069,ENSGALG00010018322,ENSGALG00010005926,ENSGALG00010028082,ENSGALG00010016400,ENSGALG00010015188,ENSGALG00010020302,ENSGALG00010000571,ENSGALG00010013428,ENSGALG00010025504                                       |
| GO:BP | response to wounding                                   | GO:0009611 | 0.033153 | ENSGALG00010019451,ENSGALG00010003750,ENSGALG00010007226,ENSGALG00010029213,ENSGALG00010014972,ENSGALG00010017460,ENSGALG00010018076,ENSGALG00010016263,ENSGALG00010022987                                                          |
| GO:BP | response to caffeine                                   | GO:0031000 | 0.033591 | ENSGALG00010009379,ENSGALG00010027351                                                                                                                                                                                               |

|       |                                                          |            |          |                                                                                                                                                                            |
|-------|----------------------------------------------------------|------------|----------|----------------------------------------------------------------------------------------------------------------------------------------------------------------------------|
| GO:BP | cellular response to caffeine                            | GO:0071313 | 0.033591 | ENSGALG00010009379,ENSGALG00010027351                                                                                                                                      |
| GO:BP | gluconeogenesis                                          | GO:0006094 | 0.033591 | ENSGALG00010023392,ENSGALG00010009385,ENSGALG00010022038,ENSGALG00010020714                                                                                                |
| GO:BP | regulation of muscle contraction                         | GO:0006937 | 0.035345 | ENSGALG00010019451,ENSGALG00010027351,ENSGALG00010013994,ENSGALG00010013029,ENSGALG00010028479                                                                             |
| GO:BP | hexose biosynthetic process                              | GO:0019319 | 0.037759 | ENSGALG00010023392,ENSGALG00010009385,ENSGALG00010022038,ENSGALG00010020714                                                                                                |
| GO:BP | muscle tissue morphogenesis                              | GO:0060415 | 0.03995  | ENSGALG00010024570,ENSGALG00010012253,ENSGALG00010012264,ENSGALG00010013029                                                                                                |
| GO:BP | nucleoside phosphate metabolic process                   | GO:0006753 | 0.045037 | ENSGALG00010018322,ENSGALG00010005926,ENSGALG00010028082,ENSGALG00010016400,ENSGALG00010015188,ENSGALG00010020302,ENSGALG00010000571,ENSGALG00010013428,ENSGALG00010025504 |
| GO:BP | positive regulation of skeletal muscle fiber development | GO:0048743 | 0.045037 | ENSGALG00010012253,ENSGALG00010012264                                                                                                                                      |

|       |                      |            |          |                                                                                                                                                                                                                                                                                                                                                                                                                                   |
|-------|----------------------|------------|----------|-----------------------------------------------------------------------------------------------------------------------------------------------------------------------------------------------------------------------------------------------------------------------------------------------------------------------------------------------------------------------------------------------------------------------------------|
| GO:CC | extracellular space  | GO:0005615 | 0.004333 | ENSGALG00010009385,ENSGALG00010006069,ENSGALG00010004358,ENSGALG00010017501,ENSGALG00010007226,ENSGALG00010017481,ENSGALG00010029213,ENSGALG00010011715,ENSGALG00010014778,ENSGALG00010022972,ENSGALG00010017512,ENSGALG00010007977,ENSGALG00010014972,ENSGALG00010017466,ENSGALG00010017460,ENSGALG00010028053,ENSGALG00010017515                                                                                                |
| GO:CC | contractile fiber    | GO:0043292 | 0.004333 | ENSGALG00010028598,ENSGALG00010006653,ENSGALG00010009379,ENSGALG00010018306,ENSGALG00010010115,ENSGALG00010023762,ENSGALG00010029628                                                                                                                                                                                                                                                                                              |
| GO:CC | extracellular region | GO:0005576 | 0.004333 | ENSGALG00010009385,ENSGALG00010006069,ENSGALG00010004358,ENSGALG00010017501,ENSGALG00010007226,ENSGALG00010017481,ENSGALG00010029213,ENSGALG00010011715,ENSGALG00010014778,ENSGALG00010022972,ENSGALG00010017512,ENSGALG00010007977,ENSGALG00010014972,ENSGALG00010017466,ENSGALG00010017460,ENSGALG00010016263,ENSGALG00010027528,ENSGALG00010022987,ENSGALG00010011455,ENSGALG00010028053,ENSGALG00010005264,ENSGALG00010017515 |
| GO:CC | sarcomere            | GO:0030017 | 0.004333 | ENSGALG00010028598,ENSGALG00010006653,ENSGALG00010009379,ENSGALG00010018306,ENSGALG00010010115,ENSGALG00010023762,ENSGALG00010029628                                                                                                                                                                                                                                                                                              |
| GO:CC | myofibril            | GO:0030016 | 0.004333 | ENSGALG00010028598,ENSGALG00010006653,ENSGALG00010009379,ENSGALG00010018306,ENSGALG00010010115,ENSGALG00010023762,ENSGALG00010029628                                                                                                                                                                                                                                                                                              |

|       |                         |            |          |                                                                                                |
|-------|-------------------------|------------|----------|------------------------------------------------------------------------------------------------|
| GO:CC | sarcoplasmic reticulum  | GO:0016529 | 0.004333 | ENSGALG00010009379,ENSGALG00010027351,ENSGALG00010023762,ENSGALG00010028479                    |
| GO:CC | pore complex            | GO:0046930 | 0.012445 | ENSGALG00010026635,ENSGALG00010026700,ENSGALG00010004338                                       |
| GO:CC | I band                  | GO:0031674 | 0.012445 | ENSGALG00010006653,ENSGALG00010009379,ENSGALG00010018306,ENSGALG00010010115,ENSGALG00010029628 |
| GO:CC | sarcoplasm              | GO:0016528 | 0.012445 | ENSGALG00010009379,ENSGALG00010027351,ENSGALG00010023762,ENSGALG00010028479                    |
| GO:CC | membrane attack complex | GO:0005579 | 0.019091 | ENSGALG00010026635,ENSGALG00010026700                                                          |
| GO:CC | chylomicron             | GO:0042627 | 0.036008 | ENSGALG00010029213,ENSGALG00010007977                                                          |
| GO:CC | Z disc                  | GO:0030018 | 0.040642 | ENSGALG00010006653,ENSGALG00010018306,ENSGALG00010010115,ENSGALG00010029628                    |

|       |                                               |            |          |                                                                                                                                                         |
|-------|-----------------------------------------------|------------|----------|---------------------------------------------------------------------------------------------------------------------------------------------------------|
| GO:CC | triglyceride-rich plasma lipoprotein particle | GO:0034385 | 0.047918 | ENSGALG00010029213,ENSGALG00010007977                                                                                                                   |
| GO:CC | very-low-density lipoprotein particle         | GO:0034361 | 0.047918 | ENSGALG00010029213,ENSGALG00010007977                                                                                                                   |
| KEGG  | Glycolysis / Gluconeogenesis                  | KEGG:00010 | 1.57E-05 | ENSGALG00010023392,ENSGALG00010021110,ENSGALG00010009385,ENSGALG00010022038,ENSGALG00010013767,ENSGALG00010020714,ENSGALG00010013428                    |
| KEGG  | Biosynthesis of amino acids                   | KEGG:01230 | 2.28E-05 | ENSGALG00010023392,ENSGALG00010021110,ENSGALG00010022038,ENSGALG00010013767,ENSGALG00010020714,ENSGALG00010016400,ENSGALG00010009676                    |
| KEGG  | Carbon metabolism                             | KEGG:01200 | 5.10E-05 | ENSGALG00010023392,ENSGALG00010021110,ENSGALG00010009385,ENSGALG00010022038,ENSGALG00010013767,ENSGALG00010020714,ENSGALG00010016400,ENSGALG00010009676 |
| KEGG  | Tight junction                                | KEGG:04530 | 0.028562 | ENSGALG00010000153,ENSGALG00010023957,ENSGALG00010016699,ENSGALG00010024650,ENSGALG00010013451,ENSGALG00010027153                                       |
| KEGG  | Regulation of actin cytoskeleton              | KEGG:04810 | 0.028562 | ENSGALG00010006653,ENSGALG00010026635,ENSGALG00010026700,ENSGALG00010013994,ENSGALG00010022987,ENSGALG00010013029,ENSGALG00010027153                    |

|      |                   |            |          |                                                                                                |
|------|-------------------|------------|----------|------------------------------------------------------------------------------------------------|
| KEGG | Purine metabolism | KEGG:00230 | 0.049899 | ENSGALG00010018322,ENSGALG00010005926,ENSGALG00010028082,ENSGALG00010016400,ENSGALG00010025504 |
|------|-------------------|------------|----------|------------------------------------------------------------------------------------------------|
