# Supplementary material for: Weighted gene co-expression network analysis identifies important modules and hub genes involved in the regulation of breast muscle yield in broilers
Source: PubMed Central journal article supplement (PMC11366510; doi:10.5713/ab.23.0548), 2024-04-25
Supplement: ab-23-0548-Supplementary-Table-12.pdf [file ab-23-0548-Supplementary-Table-12.pdf]

**Table S12. Top 30 hub genes identified in the turquoise module.**

| <b>Gene ID</b>     | <b>gene name</b>   |
|--------------------|--------------------|
| ENSGALG00010028598 | TMOD4              |
| ENSGALG00010029655 | PHKG1              |
| ENSGALG00010029215 | ENSGALG00010029215 |
| ENSGALG00010024570 | TPM1               |
| ENSGALG00010024181 | FOXD3              |
| ENSGALG00010019451 | CAV3               |
| ENSGALG00010016292 | PHKA1              |
| ENSGALG00010000153 | NF2                |
| ENSGALG00010002079 | ARX                |
| ENSGALG00010012253 | MYF6               |
| ENSGALG00010018340 | DNPEP              |
| ENSGALG00010029786 | ENSGALG00010029786 |
| ENSGALG00010017826 | PABPC4             |
| ENSGALG00010019045 | LBX1               |
| ENSGALG00010023392 | TPI1               |
| ENSGALG00010013012 | TMEM182            |
| ENSGALG00010023957 | YBX3               |
| ENSGALG00010022774 | A1CF               |
| ENSGALG00010021110 | PKLR               |
| ENSGALG00010013846 | YIPF7              |
| ENSGALG00010009385 | GPI                |
| ENSGALG00010006069 | TTR                |
| ENSGALG00010001844 | HOXA10             |
| ENSGALG00010029785 | ENSGALG00010029785 |
| ENSGALG00010004358 | GC                 |
| ENSGALG00010017501 | SPIA5              |
| ENSGALG00010006653 | CFL2               |
| ENSGALG00010003750 | CPB2               |
| ENSGALG00010023605 | INSYN1             |
| ENSGALG00010000081 | ALDOA              |
