# Supplementary material for: Weighted gene co-expression network analysis identifies important modules and hub genes involved in the regulation of breast muscle yield in broilers
Source: PubMed Central journal article supplement (PMC11366510; doi:10.5713/ab.23.0548), 2024-04-25
Supplement: ab-23-0548-Supplementary-Table-13.pdf [file ab-23-0548-Supplementary-Table-13.pdf]

**Table S13. Functional enrichment analysis of the top 30 hub genes in the turquoise module.**

| Category | Term description                                    | Term ID    | Adjusted p value | Genes                                                                                                             |
|----------|-----------------------------------------------------|------------|------------------|-------------------------------------------------------------------------------------------------------------------|
| GO:BP    | purine nucleoside diphosphate metabolic process     | GO:0009135 | 5.9E-05          | ENSGALG00010023392,ENSGALG00010021110,ENSGALG00010009385,ENSGALG00010000081                                       |
| GO:BP    | glycolytic process                                  | GO:0006096 | 5.9E-05          | ENSGALG00010023392,ENSGALG00010021110,ENSGALG00010009385,ENSGALG00010000081                                       |
| GO:BP    | ADP metabolic process                               | GO:0046031 | 5.9E-05          | ENSGALG00010023392,ENSGALG00010021110,ENSGALG00010009385,ENSGALG00010000081                                       |
| GO:BP    | nucleoside diphosphate phosphorylation              | GO:0006165 | 5.9E-05          | ENSGALG00010023392,ENSGALG00010021110,ENSGALG00010009385,ENSGALG00010000081                                       |
| GO:BP    | nucleotide phosphorylation                          | GO:0046939 | 5.9E-05          | ENSGALG00010023392,ENSGALG00010021110,ENSGALG00010009385,ENSGALG00010000081                                       |
| GO:BP    | ATP generation from ADP                             | GO:0006757 | 5.9E-05          | ENSGALG00010023392,ENSGALG00010021110,ENSGALG00010009385,ENSGALG00010000081                                       |
| GO:BP    | purine ribonucleoside diphosphate metabolic process | GO:0009179 | 5.9E-05          | ENSGALG00010023392,ENSGALG00010021110,ENSGALG00010009385,ENSGALG00010000081                                       |
| GO:BP    | ribonucleoside diphosphate metabolic process        | GO:0009185 | 5.9E-05          | ENSGALG00010023392,ENSGALG00010021110,ENSGALG00010009385,ENSGALG00010000081                                       |
| GO:BP    | striated muscle cell differentiation                | GO:0051146 | 5.9E-05          | ENSGALG00010024570,ENSGALG00010019451,ENSGALG00010012253,ENSGALG00010013012,ENSGALG00010006653                    |
| GO:BP    | muscle cell development                             | GO:0055001 | 5.9E-05          | ENSGALG00010024570,ENSGALG00010019451,ENSGALG00010012253,ENSGALG00010013012,ENSGALG00010006653                    |
| GO:BP    | generation of precursor metabolites and energy      | GO:0006091 | 5.9E-05          | ENSGALG00010029655,ENSGALG00010016292,ENSGALG00010023392,ENSGALG00010021110,ENSGALG00010009385,ENSGALG00010000081 |

|       |                                                          |            |          |                                                                                                                                                                                                                                                        |
|-------|----------------------------------------------------------|------------|----------|--------------------------------------------------------------------------------------------------------------------------------------------------------------------------------------------------------------------------------------------------------|
| GO:BP | pyruvate metabolic process                               | GO:0006090 | 6.42E-05 | ENSGALG00010023392,ENSGALG00010021110,ENSGALG00010009385,ENSGALG00010000081                                                                                                                                                                            |
| GO:BP | nucleoside diphosphate metabolic process                 | GO:0009132 | 0.000113 | ENSGALG00010023392,ENSGALG00010021110,ENSGALG00010009385,ENSGALG00010000081                                                                                                                                                                            |
| GO:BP | carbohydrate metabolic process                           | GO:0005975 | 0.000113 | ENSGALG00010029655,ENSGALG00010016292,ENSGALG00010023392,ENSGALG00010021110,ENSGALG00010009385,ENSGALG00010000081                                                                                                                                      |
| GO:BP | carbohydrate catabolic process                           | GO:0016052 | 0.000121 | ENSGALG00010023392,ENSGALG00010021110,ENSGALG00010009385,ENSGALG00010000081                                                                                                                                                                            |
| GO:BP | muscle cell differentiation                              | GO:0042692 | 0.000141 | ENSGALG00010024570,ENSGALG00010019451,ENSGALG00010012253,ENSGALG00010013012,ENSGALG00010006653                                                                                                                                                         |
| GO:BP | anatomical structure morphogenesis                       | GO:0009653 | 0.000141 | ENSGALG00010024570,ENSGALG00010019451,ENSGALG00010000153,ENSGALG00010002079,ENSGALG00010012253,ENSGALG00010019045,ENSGALG00010013012,ENSGALG00010021110,ENSGALG00010001844,ENSGALG00010006653                                                          |
| GO:BP | sarcomere organization                                   | GO:0045214 | 0.000157 | ENSGALG00010024570,ENSGALG00010019451,ENSGALG00010006653                                                                                                                                                                                               |
| GO:BP | ATP metabolic process                                    | GO:0046034 | 0.000177 | ENSGALG00010023392,ENSGALG00010021110,ENSGALG00010009385,ENSGALG00010000081                                                                                                                                                                            |
| GO:BP | anatomical structure formation involved in morphogenesis | GO:0048646 | 0.000225 | ENSGALG00010024570,ENSGALG00010019451,ENSGALG00010000153,ENSGALG00010012253,ENSGALG00010013012,ENSGALG00010021110,ENSGALG00010006653                                                                                                                   |
| GO:BP | anatomical structure development                         | GO:0048856 | 0.000284 | ENSGALG00010024570,ENSGALG00010019451,ENSGALG00010000153,ENSGALG00010002079,ENSGALG00010012253,ENSGALG00010017826,ENSGALG00010019045,ENSGALG00010013012,ENSGALG00010022774,ENSGALG00010021110,ENSGALG00010006069,ENSGALG00010001844,ENSGALG00010006653 |

|       |                                                      |            |          |                                                                                                                                                                                                                                                        |
|-------|------------------------------------------------------|------------|----------|--------------------------------------------------------------------------------------------------------------------------------------------------------------------------------------------------------------------------------------------------------|
| GO:BP | purine ribonucleoside triphosphate metabolic process | GO:0009205 | 0.000289 | ENSGALG00010023392,ENSGALG00010021110,ENSGALG00010009385,ENSGALG00010000081                                                                                                                                                                            |
| GO:BP | actomyosin structure organization                    | GO:0031032 | 0.000295 | ENSGALG00010024570,ENSGALG00010019451,ENSGALG00010000153,ENSGALG00010006653                                                                                                                                                                            |
| GO:BP | myofibril assembly                                   | GO:0030239 | 0.0003   | ENSGALG00010024570,ENSGALG00010019451,ENSGALG00010006653                                                                                                                                                                                               |
| GO:BP | ribonucleoside triphosphate metabolic process        | GO:0009199 | 0.0003   | ENSGALG00010023392,ENSGALG00010021110,ENSGALG00010009385,ENSGALG00010000081                                                                                                                                                                            |
| GO:BP | purine nucleoside triphosphate metabolic process     | GO:0009144 | 0.0003   | ENSGALG00010023392,ENSGALG00010021110,ENSGALG00010009385,ENSGALG00010000081                                                                                                                                                                            |
| GO:BP | striated muscle cell development                     | GO:0055002 | 0.000313 | ENSGALG00010024570,ENSGALG00010019451,ENSGALG00010006653                                                                                                                                                                                               |
| GO:BP | purine-containing compound metabolic process         | GO:0072521 | 0.000387 | ENSGALG00010023392,ENSGALG00010021110,ENSGALG00010009385,ENSGALG00010006069,ENSGALG00010000081                                                                                                                                                         |
| GO:BP | nucleoside triphosphate metabolic process            | GO:0009141 | 0.000403 | ENSGALG00010023392,ENSGALG00010021110,ENSGALG00010009385,ENSGALG00010000081                                                                                                                                                                            |
| GO:BP | developmental process                                | GO:0032502 | 0.000403 | ENSGALG00010024570,ENSGALG00010019451,ENSGALG00010000153,ENSGALG00010002079,ENSGALG00010012253,ENSGALG00010017826,ENSGALG00010019045,ENSGALG00010013012,ENSGALG00010022774,ENSGALG00010021110,ENSGALG00010006069,ENSGALG00010001844,ENSGALG00010006653 |
| GO:BP | cell development                                     | GO:0048468 | 0.000426 | ENSGALG00010024570,ENSGALG00010019451,ENSGALG00010000153,ENSGALG00010002079,ENSGALG00010012253,ENSGALG00010017826,ENSGALG00010013012,ENSGALG00010006069,ENSGALG00010006653                                                                             |

|       |                                                        |            |          |                                                                                                                                                                                                                                                                                                                                                                                                                                                                         |
|-------|--------------------------------------------------------|------------|----------|-------------------------------------------------------------------------------------------------------------------------------------------------------------------------------------------------------------------------------------------------------------------------------------------------------------------------------------------------------------------------------------------------------------------------------------------------------------------------|
| GO:BP | primary metabolic process                              | GO:0044238 | 0.000451 | ENSGALG00010029655,ENSGALG00010019451,ENSGALG00010016292,ENSGALG00010000153,ENSGALG00010002079,ENSGALG00010012253,ENSGALG00010018340,ENSGALG00010017826,ENSGALG00010019045,ENSGALG00010023392,ENSGALG00010022774,ENSGALG00010021110,ENSGALG00010009385,ENSGALG00010006069,ENSGALG00010001844,ENSGALG00010004358,ENSGALG00010003750,ENSGALG00010000081                                                                                                                   |
| GO:BP | biological_process                                     | GO:0008150 | 0.000476 | ENSGALG00010028598,ENSGALG00010029655,ENSGALG00010024570,ENSGALG00010019451,ENSGALG00010016292,ENSGALG00010000153,ENSGALG00010002079,ENSGALG00010012253,ENSGALG00010018340,ENSGALG00010017826,ENSGALG00010019045,ENSGALG00010023392,ENSGALG00010013012,ENSGALG00010022774,ENSGALG00010021110,ENSGALG00010013846,ENSGALG00010009385,ENSGALG00010006069,ENSGALG00010001844,ENSGALG00010004358,ENSGALG00010006653,ENSGALG00010003750,ENSGALG00010023605,ENSGALG00010000081 |
| GO:BP | NADH regeneration                                      | GO:0006735 | 0.00073  | ENSGALG00010023392,ENSGALG00010021110                                                                                                                                                                                                                                                                                                                                                                                                                                   |
| GO:BP | canonical glycolysis                                   | GO:0061621 | 0.00073  | ENSGALG00010023392,ENSGALG00010021110                                                                                                                                                                                                                                                                                                                                                                                                                                   |
| GO:BP | glucose catabolic process to pyruvate                  | GO:0061718 | 0.00073  | ENSGALG00010023392,ENSGALG00010021110                                                                                                                                                                                                                                                                                                                                                                                                                                   |
| GO:BP | glucose catabolic process                              | GO:0006007 | 0.000844 | ENSGALG00010023392,ENSGALG00010021110                                                                                                                                                                                                                                                                                                                                                                                                                                   |
| GO:BP | glycolytic process through glucose-6-phosphate         | GO:0061620 | 0.000844 | ENSGALG00010023392,ENSGALG00010021110                                                                                                                                                                                                                                                                                                                                                                                                                                   |
| GO:BP | muscle structure development                           | GO:0061061 | 0.000844 | ENSGALG00010024570,ENSGALG00010019451,ENSGALG00010012253,ENSGALG00010013012,ENSGALG00010006653                                                                                                                                                                                                                                                                                                                                                                          |
| GO:BP | nucleobase-containing small molecule metabolic process | GO:0055086 | 0.000844 | ENSGALG00010023392,ENSGALG00010021110,ENSGALG00010009385,ENSGALG00010006069,ENSGALG00010000081                                                                                                                                                                                                                                                                                                                                                                          |

|       |                                                       |            |          |                                                                                                                                                                                                                                                                                                                                                       |
|-------|-------------------------------------------------------|------------|----------|-------------------------------------------------------------------------------------------------------------------------------------------------------------------------------------------------------------------------------------------------------------------------------------------------------------------------------------------------------|
| GO:BP | cellular component assembly involved in morphogenesis | GO:0010927 | 0.000937 | ENSGALG00010024570,ENSGALG00010019451,ENSGALG00010006653                                                                                                                                                                                                                                                                                              |
| GO:BP | organic substance metabolic process                   | GO:0071704 | 0.000967 | ENSGALG00010029655,ENSGALG00010019451,ENSGALG00010016292,ENSGALG00010000153,ENSGALG00010002079,ENSGALG00010012253,ENSGALG00010018340,ENSGALG00010017826,ENSGALG00010019045,ENSGALG00010023392,ENSGALG00010022774,ENSGALG00010021110,ENSGALG00010009385,ENSGALG00010006069,ENSGALG00010001844,ENSGALG00010004358,ENSGALG00010003750,ENSGALG00010000081 |
| GO:BP | glycolytic process through fructose-6-phosphate       | GO:0061615 | 0.00098  | ENSGALG00010023392,ENSGALG00010021110                                                                                                                                                                                                                                                                                                                 |
| GO:BP | cell differentiation                                  | GO:0030154 | 0.001005 | ENSGALG00010024570,ENSGALG00010019451,ENSGALG00010000153,ENSGALG00010002079,ENSGALG00010012253,ENSGALG00010017826,ENSGALG00010019045,ENSGALG00010013012,ENSGALG00010006069,ENSGALG00010006653                                                                                                                                                         |
| GO:BP | cellular developmental process                        | GO:0048869 | 0.001051 | ENSGALG00010024570,ENSGALG00010019451,ENSGALG00010000153,ENSGALG00010002079,ENSGALG00010012253,ENSGALG00010017826,ENSGALG00010019045,ENSGALG00010013012,ENSGALG00010006069,ENSGALG00010006653                                                                                                                                                         |
| GO:BP | myotube differentiation                               | GO:0014902 | 0.001084 | ENSGALG00010019451,ENSGALG00010012253,ENSGALG00010013012                                                                                                                                                                                                                                                                                              |
| GO:BP | regulation of developmental process                   | GO:0050793 | 0.001105 | ENSGALG00010024570,ENSGALG00010019451,ENSGALG00010000153,ENSGALG00010002079,ENSGALG00010012253,ENSGALG00010019045,ENSGALG00010013012,ENSGALG00010021110                                                                                                                                                                                               |
| GO:BP | tissue morphogenesis                                  | GO:0048729 | 0.001152 | ENSGALG00010024570,ENSGALG00010019451,ENSGALG00010000153,ENSGALG00010012253,ENSGALG00010019045                                                                                                                                                                                                                                                        |
| GO:BP | regulation of actin cytoskeleton organization         | GO:0032956 | 0.001154 | ENSGALG00010028598,ENSGALG00010019451,ENSGALG00010000153,ENSGALG00010006653                                                                                                                                                                                                                                                                           |
| GO:BP | regulation of supramolecular fiber organization       | GO:1902903 | 0.001154 | ENSGALG00010028598,ENSGALG00010019451,ENSGALG00010000153,ENSGALG00010006653                                                                                                                                                                                                                                                                           |

|       |                                            |            |          |                                                                                                                                                                                                                                                                                                                                                       |
|-------|--------------------------------------------|------------|----------|-------------------------------------------------------------------------------------------------------------------------------------------------------------------------------------------------------------------------------------------------------------------------------------------------------------------------------------------------------|
| GO:BP | actin cytoskeleton organization            | GO:0030036 | 0.001185 | ENSGALG00010028598,ENSGALG00010024570,ENSGALG00010019451,ENSGALG00010000153,ENSGALG00010006653                                                                                                                                                                                                                                                        |
| GO:BP | supramolecular fiber organization          | GO:0097435 | 0.001241 | ENSGALG00010028598,ENSGALG00010024570,ENSGALG00010019451,ENSGALG00010000153,ENSGALG00010006653                                                                                                                                                                                                                                                        |
| GO:BP | metabolic process                          | GO:0008152 | 0.001406 | ENSGALG00010029655,ENSGALG00010019451,ENSGALG00010016292,ENSGALG00010000153,ENSGALG00010002079,ENSGALG00010012253,ENSGALG00010018340,ENSGALG00010017826,ENSGALG00010019045,ENSGALG00010023392,ENSGALG00010022774,ENSGALG00010021110,ENSGALG00010009385,ENSGALG00010006069,ENSGALG00010001844,ENSGALG00010004358,ENSGALG00010003750,ENSGALG00010000081 |
| GO:BP | regulation of biological quality           | GO:0065008 | 0.00148  | ENSGALG00010028598,ENSGALG00010019451,ENSGALG00010000153,ENSGALG00010017826,ENSGALG00010006069,ENSGALG00010006653,ENSGALG00010003750,ENSGALG00010023605                                                                                                                                                                                               |
| GO:BP | purine ribonucleotide metabolic process    | GO:0009150 | 0.00153  | ENSGALG00010023392,ENSGALG00010021110,ENSGALG00010009385,ENSGALG00010000081                                                                                                                                                                                                                                                                           |
| GO:BP | regulation of actin filament-based process | GO:0032970 | 0.00153  | ENSGALG00010028598,ENSGALG00010019451,ENSGALG00010000153,ENSGALG00010006653                                                                                                                                                                                                                                                                           |
| GO:BP | hexose catabolic process                   | GO:0019320 | 0.00172  | ENSGALG00010023392,ENSGALG00010021110                                                                                                                                                                                                                                                                                                                 |
| GO:BP | actin filament-based process               | GO:0030029 | 0.001784 | ENSGALG00010028598,ENSGALG00010024570,ENSGALG00010019451,ENSGALG00010000153,ENSGALG00010006653                                                                                                                                                                                                                                                        |
| GO:BP | ribose phosphate metabolic process         | GO:0019693 | 0.001805 | ENSGALG00010023392,ENSGALG00010021110,ENSGALG00010009385,ENSGALG00010000081                                                                                                                                                                                                                                                                           |
| GO:BP | ribonucleotide metabolic process           | GO:0009259 | 0.001805 | ENSGALG00010023392,ENSGALG00010021110,ENSGALG00010009385,ENSGALG00010000081                                                                                                                                                                                                                                                                           |

|       |                                     |            |          |                                                                                                                                                                                                                                                                                                                                    |
|-------|-------------------------------------|------------|----------|------------------------------------------------------------------------------------------------------------------------------------------------------------------------------------------------------------------------------------------------------------------------------------------------------------------------------------|
| GO:BP | muscle tissue development           | GO:0060537 | 0.001805 | ENSGALG00010024570,ENSGALG00010019451,ENSGALG00010012253,ENSGALG00010006653                                                                                                                                                                                                                                                        |
| GO:BP | regulation of biological process    | GO:0050789 | 0.001805 | ENSGALG00010028598,ENSGALG00010024570,ENSGALG00010019451,ENSGALG00010000153,ENSGALG00010002079,ENSGALG00010012253,ENSGALG00010017826,ENSGALG00010019045,ENSGALG00010013012,ENSGALG00010022774,ENSGALG00010021110,ENSGALG00010009385,ENSGALG00010006069,ENSGALG00010001844,ENSGALG00010006653,ENSGALG00010003750,ENSGALG00010023605 |
| GO:BP | tissue development                  | GO:0009888 | 0.001982 | ENSGALG00010024570,ENSGALG00010019451,ENSGALG00010000153,ENSGALG00010002079,ENSGALG00010012253,ENSGALG00010019045,ENSGALG00010006653                                                                                                                                                                                               |
| GO:BP | monosaccharide catabolic process    | GO:0046365 | 0.001982 | ENSGALG00010023392,ENSGALG00010021110                                                                                                                                                                                                                                                                                              |
| GO:BP | actin filament organization         | GO:0007015 | 0.002025 | ENSGALG00010028598,ENSGALG00010019451,ENSGALG00010000153,ENSGALG00010006653                                                                                                                                                                                                                                                        |
| GO:BP | phosphorylation                     | GO:0016310 | 0.002025 | ENSGALG00010029655,ENSGALG00010019451,ENSGALG00010000153,ENSGALG00010023392,ENSGALG00010021110,ENSGALG00010009385,ENSGALG00010000081                                                                                                                                                                                               |
| GO:BP | glucose metabolic process           | GO:0006006 | 0.0021   | ENSGALG00010023392,ENSGALG00010021110,ENSGALG00010009385                                                                                                                                                                                                                                                                           |
| GO:BP | nitrogen compound metabolic process | GO:0006807 | 0.002124 | ENSGALG00010029655,ENSGALG00010019451,ENSGALG00010000153,ENSGALG00010002079,ENSGALG00010012253,ENSGALG00010018340,ENSGALG00010017826,ENSGALG00010019045,ENSGALG00010023392,ENSGALG00010022774,ENSGALG00010021110,ENSGALG00010009385,ENSGALG00010006069,ENSGALG00010001844,ENSGALG00010003750,ENSGALG00010000081                    |
| GO:BP | myoblast fusion                     | GO:0007520 | 0.002309 | ENSGALG00010019451,ENSGALG00010013012                                                                                                                                                                                                                                                                                              |
| GO:BP | muscle cell cellular homeostasis    | GO:0046716 | 0.002518 | ENSGALG00010019451,ENSGALG00010006653                                                                                                                                                                                                                                                                                              |

|       |                                           |            |          |                                                                                                                                                                                                                                                                                                                                   |
|-------|-------------------------------------------|------------|----------|-----------------------------------------------------------------------------------------------------------------------------------------------------------------------------------------------------------------------------------------------------------------------------------------------------------------------------------|
| GO:BP | purine nucleotide metabolic process       | GO:0006163 | 0.002518 | ENSGALG00010023392,ENSGALG0001021110,ENSGALG00010009385,ENSGALG00010000081                                                                                                                                                                                                                                                        |
| GO:BP | biological regulation                     | GO:0065007 | 0.002682 | ENSGALG00010028598,ENSGALG0001024570,ENSGALG00010019451,ENSGALG00010000153,ENSGALG00010002079,ENSGALG00010012253,ENSGALG00010017826,ENSGALG00010019045,ENSGALG00010013012,ENSGALG00010022774,ENSGALG00010021110,ENSGALG00010009385,ENSGALG00010006069,ENSGALG00010001844,ENSGALG00010006653,ENSGALG00010003750,ENSGALG00010023605 |
| GO:BP | multicellular organismal process          | GO:0032501 | 0.002745 | ENSGALG00010024570,ENSGALG0001019451,ENSGALG00010000153,ENSGALG00010002079,ENSGALG00010012253,ENSGALG00010019045,ENSGALG00010022774,ENSGALG00010021110,ENSGALG00010006069,ENSGALG00010001844,ENSGALG00010003750,ENSGALG00010023605                                                                                                |
| GO:BP | animal organ development                  | GO:0048513 | 0.002986 | ENSGALG00010024570,ENSGALG0001019451,ENSGALG00010000153,ENSGALG00010002079,ENSGALG00010012253,ENSGALG00010019045,ENSGALG00010001844,ENSGALG00010006653                                                                                                                                                                            |
| GO:BP | organic cyclic compound metabolic process | GO:1901360 | 0.003003 | ENSGALG00010002079,ENSGALG0001012253,ENSGALG00010017826,ENSGALG00010019045,ENSGALG00010023392,ENSGALG00010022774,ENSGALG00010021110,ENSGALG00010009385,ENSGALG00010006069,ENSGALG00010001844,ENSGALG00010004358,ENSGALG00010000081                                                                                                |
| GO:BP | monocarboxylic acid metabolic process     | GO:0032787 | 0.003004 | ENSGALG00010023392,ENSGALG0001021110,ENSGALG00010009385,ENSGALG00010000081                                                                                                                                                                                                                                                        |
| GO:BP | regulation of cytoskeleton organization   | GO:0051493 | 0.003193 | ENSGALG00010028598,ENSGALG0001019451,ENSGALG00010000153,ENSGALG00010006653                                                                                                                                                                                                                                                        |
| GO:BP | carbohydrate biosynthetic process         | GO:0016051 | 0.00321  | ENSGALG00010029655,ENSGALG0001023392,ENSGALG00010009385                                                                                                                                                                                                                                                                           |
| GO:BP | hexose metabolic process                  | GO:0019318 | 0.003322 | ENSGALG00010023392,ENSGALG0001021110,ENSGALG00010009385                                                                                                                                                                                                                                                                           |



|       |                                                             |            |          |                                                                                                                                                                                                                                                                                                                                                                                                                |
|-------|-------------------------------------------------------------|------------|----------|----------------------------------------------------------------------------------------------------------------------------------------------------------------------------------------------------------------------------------------------------------------------------------------------------------------------------------------------------------------------------------------------------------------|
| GO:BP | cellular process                                            | GO:0009987 | 0.003539 | ENSGALG00010028598,ENSGALG00010029655,ENSGALG00010024570,ENSGALG00010019451,ENSGALG00010016292,ENSGALG00010000153,ENSGALG00010002079,ENSGALG00010012253,ENSGALG00010017826,ENSGALG00010019045,ENSGALG00010023392,ENSGALG00010013012,ENSGALG00010022774,ENSGALG00010021110,ENSGALG00010013846,ENSGALG00010009385,ENSGALG00010006069,ENSGALG00010001844,ENSGALG00010006653,ENSGALG00010023605,ENSGALG00010000081 |
| GO:BP | regulation of myotube differentiation                       | GO:0010830 | 0.003722 | ENSGALG00010019451,ENSGALG00010012253                                                                                                                                                                                                                                                                                                                                                                          |
| GO:BP | positive regulation of striated muscle cell differentiation | GO:0051155 | 0.003924 | ENSGALG00010019451,ENSGALG00010012253                                                                                                                                                                                                                                                                                                                                                                          |
| GO:BP | nucleotide metabolic process                                | GO:0009117 | 0.003924 | ENSGALG00010023392,ENSGALG00010021110,ENSGALG00010009385,ENSGALG00010000081                                                                                                                                                                                                                                                                                                                                    |
| GO:BP | nucleoside phosphate metabolic process                      | GO:0006753 | 0.0041   | ENSGALG00010023392,ENSGALG00010021110,ENSGALG00010009385,ENSGALG00010000081                                                                                                                                                                                                                                                                                                                                    |
| GO:BP | monosaccharide metabolic process                            | GO:0005996 | 0.004205 | ENSGALG00010023392,ENSGALG00010021110,ENSGALG00010009385                                                                                                                                                                                                                                                                                                                                                       |
| GO:BP | syncytium formation                                         | GO:0006949 | 0.004272 | ENSGALG00010019451,ENSGALG00010013012                                                                                                                                                                                                                                                                                                                                                                          |
| GO:BP | syncytium formation by plasma membrane fusion               | GO:0000768 | 0.004272 | ENSGALG00010019451,ENSGALG00010013012                                                                                                                                                                                                                                                                                                                                                                          |
| GO:BP | cell-cell fusion                                            | GO:0140253 | 0.004272 | ENSGALG00010019451,ENSGALG00010013012                                                                                                                                                                                                                                                                                                                                                                          |
| GO:BP | negative regulation of cell differentiation                 | GO:0045596 | 0.005002 | ENSGALG00010019451,ENSGALG00010000153,ENSGALG00010019045,ENSGALG00010013012                                                                                                                                                                                                                                                                                                                                    |
| GO:BP | myotube cell development                                    | GO:0014904 | 0.005093 | ENSGALG00010012253,ENSGALG00010013012                                                                                                                                                                                                                                                                                                                                                                          |
| GO:BP | animal organ morphogenesis                                  | GO:0009887 | 0.005278 | ENSGALG00010024570,ENSGALG00010019451,ENSGALG00010000153,ENSGALG00010012253,ENSGALG00010019045                                                                                                                                                                                                                                                                                                                 |

|       |                                                    |            |          |                                                                                                                                                                                                                                                                                              |
|-------|----------------------------------------------------|------------|----------|----------------------------------------------------------------------------------------------------------------------------------------------------------------------------------------------------------------------------------------------------------------------------------------------|
| GO:BP | small molecule metabolic process                   | GO:0044281 | 0.005525 | ENSGALG00010023392,ENSGALG00010021110,ENSGALG00010009385,ENSGALG00010006069,ENSGALG00010004358,ENSGALG00010000081                                                                                                                                                                            |
| GO:BP | cellular metabolic process                         | GO:0044237 | 0.005525 | ENSGALG00010029655,ENSGALG00010019451,ENSGALG00010016292,ENSGALG00010000153,ENSGALG00010002079,ENSGALG00010012253,ENSGALG00010017826,ENSGALG00010019045,ENSGALG00010023392,ENSGALG00010022774,ENSGALG00010021110,ENSGALG00010009385,ENSGALG00010006069,ENSGALG00010001844,ENSGALG00010000081 |
| GO:BP | nucleobase-containing compound metabolic process   | GO:0006139 | 0.005855 | ENSGALG00010002079,ENSGALG00010012253,ENSGALG00010017826,ENSGALG00010019045,ENSGALG00010023392,ENSGALG00010022774,ENSGALG00010021110,ENSGALG00010009385,ENSGALG00010006069,ENSGALG00010001844,ENSGALG00010000081                                                                             |
| GO:BP | regulation of actin filament depolymerization      | GO:0030834 | 0.006058 | ENSGALG00010028598,ENSGALG00010006653                                                                                                                                                                                                                                                        |
| GO:BP | regulation of actin filament organization          | GO:0110053 | 0.006058 | ENSGALG00010028598,ENSGALG00010000153,ENSGALG00010006653                                                                                                                                                                                                                                     |
| GO:BP | cell fate commitment                               | GO:0045165 | 0.006058 | ENSGALG00010002079,ENSGALG00010012253,ENSGALG00010019045                                                                                                                                                                                                                                     |
| GO:BP | cellular carbohydrate metabolic process            | GO:0044262 | 0.006101 | ENSGALG00010029655,ENSGALG00010016292,ENSGALG00010023392                                                                                                                                                                                                                                     |
| GO:BP | heart morphogenesis                                | GO:0003007 | 0.006145 | ENSGALG00010024570,ENSGALG00010019451,ENSGALG00010019045                                                                                                                                                                                                                                     |
| GO:BP | positive regulation of muscle cell differentiation | GO:0051149 | 0.006409 | ENSGALG00010019451,ENSGALG00010012253                                                                                                                                                                                                                                                        |
| GO:BP | actin filament depolymerization                    | GO:0030042 | 0.006409 | ENSGALG00010028598,ENSGALG00010006653                                                                                                                                                                                                                                                        |
| GO:BP | negative regulation of biological process          | GO:0048519 | 0.006431 | ENSGALG00010028598,ENSGALG00010024570,ENSGALG00010019451,ENSGALG00010000153,ENSGALG00010002079,ENSGALG00010012253,ENSGALG00010017826,ENSGALG00010019045,ENSGALG00010013012,ENSGALG00010003750                                                                                                |

|       |                                                    |            |          |                                                                                                                                                                                                                                                                                              |
|-------|----------------------------------------------------|------------|----------|----------------------------------------------------------------------------------------------------------------------------------------------------------------------------------------------------------------------------------------------------------------------------------------------|
| GO:BP | heterocycle metabolic process                      | GO:0046483 | 0.006644 | ENSGALG00010002079,ENSGALG00010012253,ENSGALG00010017826,ENSGALG00010019045,ENSGALG00010023392,ENSGALG00010022774,ENSGALG00010021110,ENSGALG00010009385,ENSGALG00010006069,ENSGALG00010001844,ENSGALG00010000081                                                                             |
| GO:BP | epithelium development                             | GO:0060429 | 0.00675  | ENSGALG00010019451,ENSGALG00010000153,ENSGALG00010002079,ENSGALG00010012253,ENSGALG00010019045                                                                                                                                                                                               |
| GO:BP | regulation of cellular process                     | GO:0050794 | 0.00675  | ENSGALG00010028598,ENSGALG00010024570,ENSGALG00010019451,ENSGALG00010000153,ENSGALG00010002079,ENSGALG00010012253,ENSGALG00010017826,ENSGALG00010019045,ENSGALG00010013012,ENSGALG00010021110,ENSGALG00010009385,ENSGALG00010006069,ENSGALG00010001844,ENSGALG00010006653,ENSGALG00010023605 |
| GO:BP | regulation of myoblast differentiation             | GO:0045661 | 0.006767 | ENSGALG00010012253,ENSGALG00010013012                                                                                                                                                                                                                                                        |
| GO:BP | cellular aromatic compound metabolic process       | GO:0006725 | 0.006949 | ENSGALG00010002079,ENSGALG00010012253,ENSGALG00010017826,ENSGALG00010019045,ENSGALG00010023392,ENSGALG00010022774,ENSGALG00010021110,ENSGALG00010009385,ENSGALG00010006069,ENSGALG00010001844,ENSGALG00010000081                                                                             |
| GO:BP | positive regulation of developmental process       | GO:0051094 | 0.007438 | ENSGALG00010019451,ENSGALG00010000153,ENSGALG00010002079,ENSGALG00010012253,ENSGALG00010021110                                                                                                                                                                                               |
| GO:BP | gluconeogenesis                                    | GO:0006094 | 0.00782  | ENSGALG00010023392,ENSGALG00010009385                                                                                                                                                                                                                                                        |
| GO:BP | hexose biosynthetic process                        | GO:0019319 | 0.00782  | ENSGALG00010023392,ENSGALG00010009385                                                                                                                                                                                                                                                        |
| GO:BP | regulation of striated muscle cell differentiation | GO:0051153 | 0.00782  | ENSGALG00010019451,ENSGALG00010012253                                                                                                                                                                                                                                                        |
| GO:BP | muscle organ development                           | GO:0007517 | 0.00782  | ENSGALG00010024570,ENSGALG00010012253,ENSGALG00010006653                                                                                                                                                                                                                                     |

|       |                                              |            |          |                                                                                                                                                                                                                  |
|-------|----------------------------------------------|------------|----------|------------------------------------------------------------------------------------------------------------------------------------------------------------------------------------------------------------------|
| GO:BP | cellular component morphogenesis             | GO:0032989 | 0.00782  | ENSGALG00010024570,ENSGALG00010019451,ENSGALG00010002079,ENSGALG00010006653                                                                                                                                      |
| GO:BP | multicellular organism development           | GO:0007275 | 0.00782  | ENSGALG00010024570,ENSGALG00010019451,ENSGALG00010000153,ENSGALG00010002079,ENSGALG00010012253,ENSGALG00010019045,ENSGALG00010022774,ENSGALG00010021110,ENSGALG00010001844                                       |
| GO:BP | muscle tissue morphogenesis                  | GO:0060415 | 0.008192 | ENSGALG00010024570,ENSGALG00010012253                                                                                                                                                                            |
| GO:BP | glycogen metabolic process                   | GO:0005977 | 0.00821  | ENSGALG00010029655,ENSGALG00010016292                                                                                                                                                                            |
| GO:BP | glucan metabolic process                     | GO:0044042 | 0.00821  | ENSGALG00010029655,ENSGALG00010016292                                                                                                                                                                            |
| GO:BP | monosaccharide biosynthetic process          | GO:0046364 | 0.00821  | ENSGALG00010023392,ENSGALG00010009385                                                                                                                                                                            |
| GO:BP | cellular glucan metabolic process            | GO:0006073 | 0.00821  | ENSGALG00010029655,ENSGALG00010016292                                                                                                                                                                            |
| GO:BP | regulation of cellular component size        | GO:0032535 | 0.00821  | ENSGALG00010028598,ENSGALG00010019451,ENSGALG00010006653                                                                                                                                                         |
| GO:BP | regulation of protein depolymerization       | GO:1901879 | 0.00917  | ENSGALG00010028598,ENSGALG00010006653                                                                                                                                                                            |
| GO:BP | muscle organ morphogenesis                   | GO:0048644 | 0.009452 | ENSGALG00010024570,ENSGALG00010012253                                                                                                                                                                            |
| GO:BP | energy reserve metabolic process             | GO:0006112 | 0.009736 | ENSGALG00010029655,ENSGALG00010016292                                                                                                                                                                            |
| GO:BP | cellular nitrogen compound metabolic process | GO:0034641 | 0.009847 | ENSGALG00010002079,ENSGALG00010012253,ENSGALG00010017826,ENSGALG00010019045,ENSGALG00010023392,ENSGALG00010022774,ENSGALG00010021110,ENSGALG00010009385,ENSGALG00010006069,ENSGALG00010001844,ENSGALG00010000081 |
| GO:BP | regulation of cell differentiation           | GO:0045595 | 0.010893 | ENSGALG00010019451,ENSGALG00010000153,ENSGALG00010012253,ENSGALG00010019045,ENSGALG00010013012                                                                                                                   |

|       |                                                 |            |          |                                                                                                                                      |
|-------|-------------------------------------------------|------------|----------|--------------------------------------------------------------------------------------------------------------------------------------|
| GO:BP | non-membrane-bounded organelle assembly         | GO:0140694 | 0.01126  | ENSGALG00010024570,ENSGALG00010019451,ENSGALG00010006653                                                                             |
| GO:BP | carboxylic acid metabolic process               | GO:0019752 | 0.011664 | ENSGALG00010023392,ENSGALG00010021110,ENSGALG00010009385,ENSGALG00010000081                                                          |
| GO:BP | negative regulation of developmental process    | GO:0051093 | 0.011664 | ENSGALG00010019451,ENSGALG00010000153,ENSGALG00010019045,ENSGALG00010013012                                                          |
| GO:BP | phosphate-containing compound metabolic process | GO:0006796 | 0.011983 | ENSGALG00010029655,ENSGALG00010019451,ENSGALG00010000153,ENSGALG00010023392,ENSGALG00010021110,ENSGALG00010009385,ENSGALG00010000081 |
| GO:BP | oxoacid metabolic process                       | GO:0043436 | 0.012078 | ENSGALG00010023392,ENSGALG00010021110,ENSGALG00010009385,ENSGALG00010000081                                                          |
| GO:BP | organic acid metabolic process                  | GO:0006082 | 0.012245 | ENSGALG00010023392,ENSGALG00010021110,ENSGALG00010009385,ENSGALG00010000081                                                          |
| GO:BP | phosphorus metabolic process                    | GO:0006793 | 0.012301 | ENSGALG00010029655,ENSGALG00010019451,ENSGALG00010000153,ENSGALG00010023392,ENSGALG00010021110,ENSGALG00010009385,ENSGALG00010000081 |
| GO:BP | cellular polysaccharide metabolic process       | GO:0044264 | 0.012685 | ENSGALG00010029655,ENSGALG00010016292                                                                                                |
| GO:BP | regulation of actomyosin structure organization | GO:0110020 | 0.012855 | ENSGALG00010019451,ENSGALG00010000153                                                                                                |
| GO:BP | myoblast differentiation                        | GO:0045445 | 0.013069 | ENSGALG00010012253,ENSGALG00010013012                                                                                                |
| GO:BP | protein depolymerization                        | GO:0051261 | 0.013284 | ENSGALG00010028598,ENSGALG00010006653                                                                                                |
| GO:BP | cytoskeleton organization                       | GO:0007010 | 0.013284 | ENSGALG00010028598,ENSGALG00010024570,ENSGALG00010019451,ENSGALG00010000153,ENSGALG00010006653                                       |
| GO:BP | polysaccharide metabolic process                | GO:0005976 | 0.013584 | ENSGALG00010029655,ENSGALG00010016292                                                                                                |

|       |                                                          |            |          |                                                                                                                                                         |
|-------|----------------------------------------------------------|------------|----------|---------------------------------------------------------------------------------------------------------------------------------------------------------|
| GO:BP | regulation of protein-containing complex disassembly     | GO:0043244 | 0.015083 | ENSGALG00010028598,ENSGALG00010006653                                                                                                                   |
| GO:BP | cardiac muscle contraction                               | GO:0060048 | 0.016223 | ENSGALG00010024570,ENSGALG00010019451                                                                                                                   |
| GO:BP | regulation of muscle cell differentiation                | GO:0051147 | 0.016449 | ENSGALG00010019451,ENSGALG00010012253                                                                                                                   |
| GO:BP | organic hydroxy compound metabolic process               | GO:1901615 | 0.016449 | ENSGALG00010023392,ENSGALG00010006069,ENSGALG00010004358                                                                                                |
| GO:BP | regulation of anatomical structure size                  | GO:0090066 | 0.016934 | ENSGALG00010028598,ENSGALG00010019451,ENSGALG00010006653                                                                                                |
| GO:BP | regionalization                                          | GO:0003002 | 0.016934 | ENSGALG00010012253,ENSGALG00010019045,ENSGALG00010001844                                                                                                |
| GO:BP | organophosphate metabolic process                        | GO:0019637 | 0.018829 | ENSGALG00010023392,ENSGALG00010021110,ENSGALG00010009385,ENSGALG00010000081                                                                             |
| GO:BP | cardiac chamber morphogenesis                            | GO:0003206 | 0.020406 | ENSGALG00010024570,ENSGALG00010019451                                                                                                                   |
| GO:BP | striated muscle contraction                              | GO:0006941 | 0.020569 | ENSGALG00010024570,ENSGALG00010019451                                                                                                                   |
| GO:BP | negative regulation of cytoskeleton organization         | GO:0051494 | 0.020569 | ENSGALG00010028598,ENSGALG00010019451                                                                                                                   |
| GO:BP | negative regulation of supramolecular fiber organization | GO:1902904 | 0.020569 | ENSGALG00010028598,ENSGALG00010019451                                                                                                                   |
| GO:BP | negative regulation of MAPK cascade                      | GO:0043409 | 0.020569 | ENSGALG00010019451,ENSGALG00010000153                                                                                                                   |
| GO:BP | pattern specification process                            | GO:0007389 | 0.020569 | ENSGALG00010012253,ENSGALG00010019045,ENSGALG00010001844                                                                                                |
| GO:BP | negative regulation of cellular process                  | GO:0048523 | 0.020569 | ENSGALG00010028598,ENSGALG00010024570,ENSGALG00010019451,ENSGALG00010000153,ENSGALG00010002079,ENSGALG00010012253,ENSGALG00010019045,ENSGALG00010013012 |

|       |                                                          |            |          |                                                                                                                                                                                                                                                        |
|-------|----------------------------------------------------------|------------|----------|--------------------------------------------------------------------------------------------------------------------------------------------------------------------------------------------------------------------------------------------------------|
| GO:BP | carbohydrate derivative metabolic process                | GO:1901135 | 0.021374 | ENSGALG00010023392,ENSGALG00010021110,ENSGALG00010009385,ENSGALG00010000081                                                                                                                                                                            |
| GO:BP | regulation of actin polymerization or depolymerization   | GO:0008064 | 0.021418 | ENSGALG00010028598,ENSGALG00010006653                                                                                                                                                                                                                  |
| GO:BP | regulation of actin filament length                      | GO:0030832 | 0.021418 | ENSGALG00010028598,ENSGALG00010006653                                                                                                                                                                                                                  |
| GO:BP | regulation of organelle organization                     | GO:0033043 | 0.021951 | ENSGALG00010028598,ENSGALG00010019451,ENSGALG00010000153,ENSGALG00010006653                                                                                                                                                                            |
| GO:BP | positive regulation of supramolecular fiber organization | GO:1902905 | 0.022417 | ENSGALG00010000153,ENSGALG00010006653                                                                                                                                                                                                                  |
| GO:BP | circulatory system development                           | GO:0072359 | 0.022417 | ENSGALG00010024570,ENSGALG00010019451,ENSGALG00010019045,ENSGALG00010021110                                                                                                                                                                            |
| GO:BP | pallium development                                      | GO:0021543 | 0.024253 | ENSGALG00010000153,ENSGALG00010002079                                                                                                                                                                                                                  |
| GO:BP | macromolecule metabolic process                          | GO:0043170 | 0.024253 | ENSGALG00010029655,ENSGALG00010019451,ENSGALG00010016292,ENSGALG00010000153,ENSGALG00010002079,ENSGALG00010012253,ENSGALG00010018340,ENSGALG00010017826,ENSGALG00010019045,ENSGALG00010022774,ENSGALG00010021110,ENSGALG00010001844,ENSGALG00010003750 |
| GO:BP | organonitrogen compound metabolic process                | GO:1901564 | 0.02521  | ENSGALG00010029655,ENSGALG00010019451,ENSGALG00010000153,ENSGALG00010018340,ENSGALG00010023392,ENSGALG00010021110,ENSGALG00010009385,ENSGALG00010006069,ENSGALG00010003750,ENSGALG00010000081                                                          |
| GO:BP | neural precursor cell proliferation                      | GO:0061351 | 0.026212 | ENSGALG00010000153,ENSGALG00010002079                                                                                                                                                                                                                  |
| GO:BP | skeletal muscle tissue development                       | GO:0007519 | 0.026474 | ENSGALG00010012253,ENSGALG00010006653                                                                                                                                                                                                                  |
| GO:BP | heart development                                        | GO:0007507 | 0.026474 | ENSGALG00010024570,ENSGALG00010019451,ENSGALG00010019045                                                                                                                                                                                               |

|       |                                                        |            |          |                                                                                                                                      |
|-------|--------------------------------------------------------|------------|----------|--------------------------------------------------------------------------------------------------------------------------------------|
| GO:BP | positive regulation of cytoskeleton organization       | GO:0051495 | 0.026574 | ENSGALG00010000153,ENSGALG0001006653                                                                                                 |
| GO:BP | actin polymerization or depolymerization               | GO:0008154 | 0.026574 | ENSGALG00010028598,ENSGALG0001006653                                                                                                 |
| GO:BP | system development                                     | GO:0048731 | 0.026574 | ENSGALG00010024570,ENSGALG00010019451,ENSGALG00010000153,ENSGALG00010002079,ENSGALG00010019045,ENSGALG00010021110,ENSGALG00010001844 |
| GO:BP | skeletal muscle organ development                      | GO:0060538 | 0.027297 | ENSGALG00010012253,ENSGALG0001006653                                                                                                 |
| GO:BP | negative regulation of cellular component organization | GO:0051129 | 0.027297 | ENSGALG00010028598,ENSGALG00010019451,ENSGALG00010013012                                                                             |
| GO:BP | negative regulation of protein kinase activity         | GO:0006469 | 0.027498 | ENSGALG00010019451,ENSGALG00010000153                                                                                                |
| GO:BP | cardiac chamber development                            | GO:0003205 | 0.027498 | ENSGALG00010024570,ENSGALG00010019451                                                                                                |
| GO:BP | heart contraction                                      | GO:0060047 | 0.028909 | ENSGALG00010024570,ENSGALG00010019451                                                                                                |
| GO:BP | cardiac muscle tissue development                      | GO:0048738 | 0.028909 | ENSGALG00010024570,ENSGALG00010019451                                                                                                |
| GO:BP | negative regulation of cell population proliferation   | GO:0008285 | 0.028909 | ENSGALG00010024570,ENSGALG00010000153,ENSGALG00010019045                                                                             |
| GO:BP | embryo development                                     | GO:0009790 | 0.028909 | ENSGALG00010000153,ENSGALG00010012253,ENSGALG00010019045,ENSGALG00010001844                                                          |
| GO:BP | cellular component assembly                            | GO:0022607 | 0.029397 | ENSGALG00010028598,ENSGALG00010024570,ENSGALG00010019451,ENSGALG00010000153,ENSGALG00010006069,ENSGALG00010006653                    |
| GO:BP | organic substance catabolic process                    | GO:1901575 | 0.02966  | ENSGALG00010017826,ENSGALG00010023392,ENSGALG00010021110,ENSGALG00010009385,ENSGALG00010000081                                       |
| GO:BP | developmental growth                                   | GO:0048589 | 0.030136 | ENSGALG00010002079,ENSGALG00010013012,ENSGALG00010006069                                                                             |



|       |                                                    |            |          |                                                                                                                                                                            |
|-------|----------------------------------------------------|------------|----------|----------------------------------------------------------------------------------------------------------------------------------------------------------------------------|
| GO:BP | negative regulation of kinase activity             | GO:0033673 | 0.030393 | ENSGALG00010019451,ENSGALG00010000153                                                                                                                                      |
| GO:BP | heart process                                      | GO:0003015 | 0.031426 | ENSGALG00010024570,ENSGALG00010019451                                                                                                                                      |
| GO:BP | central nervous system neuron differentiation      | GO:0021953 | 0.031426 | ENSGALG00010002079,ENSGALG00010019045                                                                                                                                      |
| GO:BP | regulation of macromolecule metabolic process      | GO:0060255 | 0.031426 | ENSGALG00010019451,ENSGALG00010000153,ENSGALG00010002079,ENSGALG00010012253,ENSGALG00010017826,ENSGALG00010019045,ENSGALG00010022774,ENSGALG00010021110,ENSGALG00010001844 |
| GO:BP | negative regulation of cell development            | GO:0010721 | 0.031503 | ENSGALG00010019451,ENSGALG00010000153                                                                                                                                      |
| GO:BP | striated muscle tissue development                 | GO:0014706 | 0.032277 | ENSGALG00010024570,ENSGALG00010019451                                                                                                                                      |
| GO:BP | protein-containing complex disassembly             | GO:0032984 | 0.033057 | ENSGALG00010028598,ENSGALG00010006653                                                                                                                                      |
| GO:BP | regulation of cell development                     | GO:0060284 | 0.033845 | ENSGALG00010019451,ENSGALG00010000153,ENSGALG00010012253                                                                                                                   |
| GO:BP | regulation of cellular component organization      | GO:0051128 | 0.033845 | ENSGALG00010028598,ENSGALG00010019451,ENSGALG00010000153,ENSGALG00010013012,ENSGALG00010006653                                                                             |
| GO:BP | cellular component organization                    | GO:0016043 | 0.033845 | ENSGALG00010028598,ENSGALG00010024570,ENSGALG00010019451,ENSGALG00010000153,ENSGALG00010002079,ENSGALG00010013012,ENSGALG00010013846,ENSGALG00010006069,ENSGALG00010006653 |
| GO:BP | embryonic morphogenesis                            | GO:0048598 | 0.034141 | ENSGALG00010000153,ENSGALG00010019045,ENSGALG00010001844                                                                                                                   |
| GO:BP | negative regulation of transferase activity        | GO:0051348 | 0.036477 | ENSGALG00010019451,ENSGALG00010000153                                                                                                                                      |
| GO:BP | post-transcriptional regulation of gene expression | GO:0010608 | 0.037231 | ENSGALG00010017826,ENSGALG00010022774,ENSGALG00010021110                                                                                                                   |

|       |                                                   |            |          |                                                                                                                                                                            |
|-------|---------------------------------------------------|------------|----------|----------------------------------------------------------------------------------------------------------------------------------------------------------------------------|
| GO:BP | cellular component biogenesis                     | GO:0044085 | 0.037277 | ENSGALG00010028598,ENSGALG00010024570,ENSGALG00010019451,ENSGALG00010000153,ENSGALG00010006069,ENSGALG00010006653                                                          |
| GO:BP | anterior/posterior pattern specification          | GO:0009952 | 0.037913 | ENSGALG00010012253,ENSGALG0001001844                                                                                                                                       |
| GO:BP | cellular component organization or biogenesis     | GO:0071840 | 0.038467 | ENSGALG00010028598,ENSGALG00010024570,ENSGALG00010019451,ENSGALG00010000153,ENSGALG00010002079,ENSGALG00010013012,ENSGALG00010013846,ENSGALG00010006069,ENSGALG00010006653 |
| GO:BP | muscle contraction                                | GO:0006936 | 0.038935 | ENSGALG00010024570,ENSGALG00010019451                                                                                                                                      |
| GO:BP | regulation of cell population proliferation       | GO:0042127 | 0.039515 | ENSGALG00010024570,ENSGALG00010000153,ENSGALG00010002079,ENSGALG00010019045                                                                                                |
| GO:BP | telencephalon development                         | GO:0021537 | 0.039585 | ENSGALG00010000153,ENSGALG0001002079                                                                                                                                       |
| GO:BP | regulation of anatomical structure morphogenesis  | GO:0022603 | 0.040373 | ENSGALG00010024570,ENSGALG00010019451,ENSGALG00010021110                                                                                                                   |
| GO:BP | regulation of cellular metabolic process          | GO:0031323 | 0.040373 | ENSGALG00010019451,ENSGALG00010000153,ENSGALG00010002079,ENSGALG00010012253,ENSGALG00010017826,ENSGALG00010019045,ENSGALG00010021110,ENSGALG00010001844                    |
| GO:BP | alcohol metabolic process                         | GO:0006066 | 0.040966 | ENSGALG00010023392,ENSGALG00010006069                                                                                                                                      |
| GO:BP | positive regulation of cell differentiation       | GO:0045597 | 0.040966 | ENSGALG00010019451,ENSGALG00010000153,ENSGALG00010012253                                                                                                                   |
| GO:BP | regulation of nitrogen compound metabolic process | GO:0051171 | 0.041447 | ENSGALG00010019451,ENSGALG00010000153,ENSGALG00010002079,ENSGALG00010012253,ENSGALG00010017826,ENSGALG00010019045,ENSGALG00010021110,ENSGALG00010001844                    |
| GO:BP | regulation of metabolic process                   | GO:0019222 | 0.042396 | ENSGALG00010019451,ENSGALG00010000153,ENSGALG00010002079,ENSGALG00010012253,ENSGALG00010017826,ENSGALG00010019045,ENSGALG00010022774,ENSGALG00010021110,ENSGALG00010001844 |

|       |                                                     |            |          |                                                                                                                                                                                                                                                                                                                                                                                             |
|-------|-----------------------------------------------------|------------|----------|---------------------------------------------------------------------------------------------------------------------------------------------------------------------------------------------------------------------------------------------------------------------------------------------------------------------------------------------------------------------------------------------|
| GO:BP | catabolic process                                   | GO:0009056 | 0.04534  | ENSGALG00010017826,ENSGALG00010023392,ENSGALG00010021110,ENSGALG00010009385,ENSGALG00010000081                                                                                                                                                                                                                                                                                              |
| GO:BP | regulation of primary metabolic process             | GO:0080090 | 0.046352 | ENSGALG00010019451,ENSGALG00010000153,ENSGALG00010002079,ENSGALG00010012253,ENSGALG00010017826,ENSGALG00010019045,ENSGALG00010021110,ENSGALG00010001844                                                                                                                                                                                                                                     |
| GO:BP | negative regulation of protein phosphorylation      | GO:0001933 | 0.047599 | ENSGALG00010019451,ENSGALG00010000153                                                                                                                                                                                                                                                                                                                                                       |
| GO:BP | growth                                              | GO:0040007 | 0.04785  | ENSGALG00010002079,ENSGALG00010013012,ENSGALG00010006069                                                                                                                                                                                                                                                                                                                                    |
| GO:BP | energy derivation by oxidation of organic compounds | GO:0015980 | 0.048675 | ENSGALG00010029655,ENSGALG00010016292                                                                                                                                                                                                                                                                                                                                                       |
| GO:BP | small molecule catabolic process                    | GO:0044282 | 0.048929 | ENSGALG00010023392,ENSGALG00010021110                                                                                                                                                                                                                                                                                                                                                       |
| GO:BP | muscle system process                               | GO:0003012 | 0.049729 | ENSGALG00010024570,ENSGALG00010019451                                                                                                                                                                                                                                                                                                                                                       |
| GO:CC | actin cytoskeleton                                  | GO:0015629 | 0.015768 | ENSGALG00010028598,ENSGALG00010024570,ENSGALG00010000153,ENSGALG00010006653                                                                                                                                                                                                                                                                                                                 |
| GO:CC | cytoplasm                                           | GO:0005737 | 0.015768 | ENSGALG00010028598,ENSGALG00010029655,ENSGALG00010024570,ENSGALG00010019451,ENSGALG00010000153,ENSGALG00010018340,ENSGALG00010017826,ENSGALG00010023392,ENSGALG00010022774,ENSGALG00010021110,ENSGALG00010013846,ENSGALG00010009385,ENSGALG00010006069,ENSGALG00010001844,ENSGALG00010006653                                                                                                |
| GO:CC | cellular_component                                  | GO:0005575 | 0.034358 | ENSGALG00010028598,ENSGALG00010029655,ENSGALG00010024570,ENSGALG00010019451,ENSGALG00010000153,ENSGALG00010012253,ENSGALG00010018340,ENSGALG00010017826,ENSGALG00010019045,ENSGALG00010023392,ENSGALG00010022774,ENSGALG00010021110,ENSGALG00010013846,ENSGALG00010009385,ENSGALG00010006069,ENSGALG00010001844,ENSGALG00010004358,ENSGALG00010017501,ENSGALG00010006653,ENSGALG00010023605 |

|       |                                    |            |          |                                                                                                                                                                                                                                                                                                                                                                          |
|-------|------------------------------------|------------|----------|--------------------------------------------------------------------------------------------------------------------------------------------------------------------------------------------------------------------------------------------------------------------------------------------------------------------------------------------------------------------------|
| GO:CC | sarcomere                          | GO:0030017 | 0.040988 | ENSGALG00010028598,ENSGALG00010006653                                                                                                                                                                                                                                                                                                                                    |
| GO:CC | ruffle                             | GO:0001726 | 0.040988 | ENSGALG00010024570,ENSGALG00010000153                                                                                                                                                                                                                                                                                                                                    |
| GO:CC | extracellular space                | GO:0005615 | 0.040988 | ENSGALG00010009385,ENSGALG00010006069,ENSGALG00010004358,ENSGALG00010017501                                                                                                                                                                                                                                                                                              |
| GO:CC | cytosol                            | GO:0005829 | 0.040988 | ENSGALG00010024570,ENSGALG00010000153,ENSGALG00010018340,ENSGALG00010017826,ENSGALG00010023392,ENSGALG00010021110,ENSGALG00010009385                                                                                                                                                                                                                                     |
| GO:CC | intracellular anatomical structure | GO:0005622 | 0.040988 | ENSGALG00010028598,ENSGALG00010029655,ENSGALG00010024570,ENSGALG00010019451,ENSGALG00010000153,ENSGALG00010012253,ENSGALG00010018340,ENSGALG00010017826,ENSGALG00010023392,ENSGALG00010022774,ENSGALG00010021110,ENSGALG00010013846,ENSGALG00010009385,ENSGALG00010006069,ENSGALG00010001844,ENSGALG00010006653                                                          |
| GO:CC | cellular anatomical entity         | GO:0110165 | 0.040988 | ENSGALG00010028598,ENSGALG00010029655,ENSGALG00010024570,ENSGALG00010019451,ENSGALG00010000153,ENSGALG00010012253,ENSGALG00010018340,ENSGALG00010017826,ENSGALG00010023392,ENSGALG00010022774,ENSGALG00010021110,ENSGALG00010013846,ENSGALG00010009385,ENSGALG00010006069,ENSGALG00010001844,ENSGALG00010004358,ENSGALG00010017501,ENSGALG00010006653,ENSGALG00010023605 |
| GO:CC | transcription regulator complex    | GO:0005667 | 0.041257 | ENSGALG00010012253,ENSGALG00010019045,ENSGALG00010001844                                                                                                                                                                                                                                                                                                                 |
| GO:CC | myofibril                          | GO:0030016 | 0.041749 | ENSGALG00010028598,ENSGALG00010006653                                                                                                                                                                                                                                                                                                                                    |
| GO:CC | contractile fiber                  | GO:0043292 | 0.041749 | ENSGALG00010028598,ENSGALG00010006653                                                                                                                                                                                                                                                                                                                                    |
| GO:MF | actin binding                      | GO:0003779 | 0.000452 | ENSGALG00010028598,ENSGALG00010024570,ENSGALG00010000153,ENSGALG00010004358,ENSGALG00010006653                                                                                                                                                                                                                                                                           |

|       |                                        |            |          |                                                                                                                                                                                                                                                                                                                                                                                                                |
|-------|----------------------------------------|------------|----------|----------------------------------------------------------------------------------------------------------------------------------------------------------------------------------------------------------------------------------------------------------------------------------------------------------------------------------------------------------------------------------------------------------------|
| GO:MF | binding                                | GO:0005488 | 0.00083  | ENSGALG00010028598,ENSGALG00010029655,ENSGALG00010024570,ENSGALG00010019451,ENSGALG00010016292,ENSGALG00010000153,ENSGALG00010002079,ENSGALG00010012253,ENSGALG00010018340,ENSGALG00010017826,ENSGALG00010019045,ENSGALG00010023392,ENSGALG00010023957,ENSGALG00010022774,ENSGALG00010021110,ENSGALG00010009385,ENSGALG00010006069,ENSGALG00010001844,ENSGALG00010004358,ENSGALG00010006653,ENSGALG00010003750 |
| GO:MF | cytoskeletal protein binding           | GO:0008092 | 0.000866 | ENSGALG00010028598,ENSGALG00010024570,ENSGALG00010019451,ENSGALG00010000153,ENSGALG00010004358,ENSGALG00010006653                                                                                                                                                                                                                                                                                              |
| GO:MF | intramolecular oxidoreductase activity | GO:0016860 | 0.005255 | ENSGALG00010023392,ENSGALG00010009385                                                                                                                                                                                                                                                                                                                                                                          |
| GO:MF | protein binding                        | GO:0005515 | 0.011037 | ENSGALG00010028598,ENSGALG00010029655,ENSGALG00010024570,ENSGALG00010019451,ENSGALG00010016292,ENSGALG00010000153,ENSGALG00010012253,ENSGALG00010018340,ENSGALG00010023392,ENSGALG00010009385,ENSGALG00010006069,ENSGALG00010001844,ENSGALG00010004358,ENSGALG00010006653                                                                                                                                      |
| GO:MF | single-stranded RNA binding            | GO:0003727 | 0.011739 | ENSGALG00010017826,ENSGALG00010022774                                                                                                                                                                                                                                                                                                                                                                          |
| GO:MF | nucleic acid binding                   | GO:0003676 | 0.016043 | ENSGALG00010002079,ENSGALG00010012253,ENSGALG00010017826,ENSGALG00010019045,ENSGALG00010023957,ENSGALG00010022774,ENSGALG00010021110,ENSGALG00010001844                                                                                                                                                                                                                                                        |
| GO:MF | exopeptidase activity                  | GO:0008238 | 0.019835 | ENSGALG00010018340,ENSGALG00010003750                                                                                                                                                                                                                                                                                                                                                                          |
| GO:MF | calmodulin binding                     | GO:0005516 | 0.019835 | ENSGALG00010029655,ENSGALG00010016292                                                                                                                                                                                                                                                                                                                                                                          |

|       |                                                                       |            |          |                                                                                                                                                                                              |
|-------|-----------------------------------------------------------------------|------------|----------|----------------------------------------------------------------------------------------------------------------------------------------------------------------------------------------------|
| GO:MF | organic cyclic compound binding                                       | GO:0097159 | 0.022924 | ENSGALG00010029655,ENSGALG0001002079,ENSGALG00010012253,ENSGALG00010017826,ENSGALG00010019045,ENSGALG00010023957,ENSGALG00010022774,ENSGALG00010021110,ENSGALG00010001844,ENSGALG00010004358 |
| GO:MF | isomerase activity                                                    | GO:0016853 | 0.028434 | ENSGALG00010023392,ENSGALG00010009385                                                                                                                                                        |
| GO:MF | DNA-binding transcription factor activity                             | GO:0003700 | 0.028434 | ENSGALG00010002079,ENSGALG00010012253,ENSGALG00010019045,ENSGALG00010001844                                                                                                                  |
| GO:MF | actin filament binding                                                | GO:0051015 | 0.028628 | ENSGALG00010028598,ENSGALG00010006653                                                                                                                                                        |
| GO:MF | lyase activity                                                        | GO:0016829 | 0.039499 | ENSGALG00010023392,ENSGALG00010000081                                                                                                                                                        |
| GO:MF | RNA polymerase II cis-regulatory region sequence-specific DNA binding | GO:0000978 | 0.044598 | ENSGALG00010002079,ENSGALG00010012253,ENSGALG00010001844                                                                                                                                     |
| GO:MF | heterocyclic compound binding                                         | GO:1901363 | 0.044598 | ENSGALG00010029655,ENSGALG0001002079,ENSGALG00010012253,ENSGALG00010017826,ENSGALG00010019045,ENSGALG00010023957,ENSGALG00010022774,ENSGALG00010021110,ENSGALG00010001844                    |
| GO:MF | cis-regulatory region sequence-specific DNA binding                   | GO:0000987 | 0.046697 | ENSGALG00010002079,ENSGALG00010012253,ENSGALG00010001844                                                                                                                                     |
| GO:MF | mRNA binding                                                          | GO:0003729 | 0.047635 | ENSGALG00010017826,ENSGALG00010021110                                                                                                                                                        |
| KEGG  | Glycolysis / Gluconeogenesis                                          | KEGG:00010 | 0.000351 | ENSGALG00010023392,ENSGALG00010021110,ENSGALG00010009385                                                                                                                                     |
| KEGG  | Carbon metabolism                                                     | KEGG:01200 | 0.001359 | ENSGALG00010023392,ENSGALG00010021110,ENSGALG00010009385                                                                                                                                     |
| KEGG  | Biosynthesis of amino acids                                           | KEGG:01230 | 0.010857 | ENSGALG00010023392,ENSGALG00010021110                                                                                                                                                        |
| KEGG  | Insulin signaling pathway                                             | KEGG:04910 | 0.02625  | ENSGALG00010029655,ENSGALG00010016292                                                                                                                                                        |

|      |                |            |         |                                                                                                                                                                                                                  |
|------|----------------|------------|---------|------------------------------------------------------------------------------------------------------------------------------------------------------------------------------------------------------------------|
| KEGG | KEGG root term | KEGG:00000 | 0.02625 | ENSGALG00010029655,ENSGALG00010024570,ENSGALG00010019451,ENSGALG00010016292,ENSGALG00010000153,ENSGALG00010017826,ENSGALG00010023392,ENSGALG00010023957,ENSGALG00010021110,ENSGALG00010009385,ENSGALG00010006653 |
| KEGG | Tight junction | KEGG:04530 | 0.03319 | ENSGALG00010000153,ENSGALG00010023957                                                                                                                                                                            |
