# Supplementary material for: Weighted gene co-expression network analysis identifies important modules and hub genes involved in the regulation of breast muscle yield in broilers
Source: PubMed Central journal article supplement (PMC11366510; doi:10.5713/ab.23.0548), 2024-04-25
Supplement: ab-23-0548-Supplementary-Table-14.pdf [file ab-23-0548-Supplementary-Table-14.pdf]

**Table S14. Comparison of breast muscle yield between the 817 brolier and Wannan chickens at the market age.**

| Item                | 817 broliers | Wannan chickens | P values |
|---------------------|--------------|-----------------|----------|
| Breast muscle yield | 19.22±0.78   | 14.88±0.85      | 0.00016  |
