# Supplementary material for: Weighted gene co-expression network analysis identifies important modules and hub genes involved in the regulation of breast muscle yield in broilers
Source: PubMed Central journal article supplement (PMC11366510; doi:10.5713/ab.23.0548), 2024-04-25
Supplement: ab-23-0548-Supplementary-Table-15.pdf [file ab-23-0548-Supplementary-Table-15.pdf]

**Table S15. Correlation analysis between the expression of the 6 genes and breast muscle yield in the 817 broilers\*.**

| Genes  | Breast muscle yield |
|--------|---------------------|
| CAV3   | 0.731095**          |
| CFL2   | 0.625810*           |
| MYF6   | 0.759531**          |
| TPM1   | 0.698414**          |
| SH3RF2 | -0.620048*          |
| DLX3   | -0.708843**         |

\*Significant correlation (P<0.05), \*\*extremely significant correlation (P<0.01)
